# Supplementary material for: Influence of Landscape Design on Driving Behavior Based on Slope Illusion
Source: Hindawi journal article supplement (doi:10.1155/2022/6407145), 2022-01-12
Supplement: f1 [file 6407145.f1.zip]

Archive with 8 entries (8 files):
- 1.txt
- 2.txt
- 3.txt
- 4.txt
- 5.txt
- 6.txt
- 7.txt
- 8.txt
