# Supplementary material for: Influence of Landscape Design on Driving Behavior Based on Slope Illusion
Source: Hindawi journal article supplement (doi:10.1155/2022/6407145), 2022-01-12
Supplement: f1 [file 6407145.f1.zip › 1.txt]

CO2 emission report
0.3	0.028	0.056	0.00231
Time(s)	Vehicle Name	Road Name	Travelled Distance (m)	Speed(km/h)	Steering Wheel Angle(-1..1)	Acceleration(m/s^2)	Accelerate (0..1)	Brake (0..1)	X Pos(m)	Y Pos(m)	Z Pos(m)	Distance to the left border(m)	Distance to the right border(m)	Measurement Point Number	Gasoline Consumption(cc/sec)	Carbon Dioxide Emission(kg/sec)	Progressive Gasoline Consumption(cc)	Progressive Carbon Dioxide Emission(kg)
0			0	0	0	0	0	0	0	10000	0	NAN	NAN	1	0	0	0	0
83.35149179	×ÔÉí³µÁ¾	Road 1	0.210310515	0.009083435	0	0.423589438	0	0	17.2786	977.0928	655.7373	3.8317	0.7021	2	0.300070653	0.000693163	25.01133659	0.057776188
83.36675959	×ÔÉí³µÁ¾	Road 1	0.210513793	0.047930964	0	0.473767698	0	0	17.2789	977.0928	655.7373	3.8317	0.7021	3	0.300999633	0.000695309	25.01593219	0.057786803
83.39933543	×ÔÉí³µÁ¾	Road 1	0.211286285	0.085369188	0	0.477168232	0	0	17.2794	977.0928	655.7373	3.8317	0.7021	4	0.301325945	0.000696063	25.02574814	0.057809478
83.46400694	×ÔÉí³µÁ¾	Road 1	0.214510241	0.179464526	0	0.548720062	0	0	17.2817	977.0928	655.7373	3.8317	0.7021	5	0.303060825	0.000700071	25.04534754	0.057854753
83.49730123	×ÔÉí³µÁ¾	Road 1	0.216719309	0.238859108	0	0.588476896	0	0	17.2837	977.0928	655.7373	3.8318	0.702	6	0.305082368	0.00070474	25.05550504	0.057878217
83.51417894	×ÔÉí³µÁ¾	Road 1	0.217956974	0.263992801	0	0.60392946	0	0	17.2847	977.0928	655.7373	3.8318	0.702	7	0.30528896	0.000705217	25.06065762	0.057890119
83.53065161	×ÔÉí³µÁ¾	Road 1	0.219352849	0.305059889	0	0.628083289	0	0	17.2865	977.0928	655.7373	3.8318	0.702	8	0.308502759	0.000712641	25.06573948	0.057901858
83.5473618	×ÔÉí³µÁ¾	Road 1	0.220894757	0.332184532	0	0.64303571	0	0	17.2877	977.0928	655.7373	3.8318	0.702	9	0.307053288	0.000709293	25.0708704	0.057913711
83.56422229	×ÔÉí³µÁ¾	Road 1	0.222590582	0.362087515	0	0.659248292	0	0	17.2892	977.0928	655.7373	3.8319	0.7019	10	0.308136794	0.000711796	25.07606574	0.057925712
83.58062824	×ÔÉí³µÁ¾	Road 1	0.224371291	0.39074555	0	0.673318982	0	0	17.2906	977.0928	655.7373	3.8319	0.7019	11	0.308721465	0.000713147	25.08113061	0.057937412
83.59724863	×ÔÉí³µÁ¾	Road 1	0.226340387	0.426508972	0	0.6907233	0	0	17.2926	977.0928	655.7373	3.8319	0.7019	12	0.310915973	0.000718216	25.08629815	0.057949349
83.61442838	×ÔÉí³µÁ¾	Road 1	0.228540608	0.461054134	0	0.703495383	0	0	17.2945	977.0928	655.7373	3.832	0.7018	13	0.31129772	0.000719098	25.09164617	0.057961703
83.63059571	×ÔÉí³µÁ¾	Road 1	0.230809228	0.505156517	0	0.715067267	0	0	17.2969	977.0928	655.7373	3.832	0.7018	14	0.315317815	0.000728384	25.09674401	0.057973479					62.90550144
83.64730444	×ÔÉí³µÁ¾	Road 1	0.233278336	0.531984669	0	0.721249759	0	0	17.299	977.0928	655.7373	3.832	0.7018	15	0.311333279	0.00071918	25.101946	0.057985495
83.66397798	×ÔÉí³µÁ¾	Road 1	0.236014585	0.590786362	0	0.730309665	0	0	17.303	977.0928	655.7373	3.8321	0.7017	16	0.321704463	0.000743137	25.10730995	0.057997886
83.68056098	×ÔÉí³µÁ¾	Road 1	0.238883176	0.62274161	0	0.733170092	0	0	17.3054	977.0928	655.7373	3.8322	0.7016	17	0.314947978	0.00072753	25.11253273	0.058009951
83.69722829	×ÔÉí³µÁ¾	Road 1	0.241914906	0.654828608	0	0.736050725	0	0	17.3079	977.0938	655.7373	3.8312	0.7026	18	0.315720619	0.000729315	25.11779494	0.058022106
83.71424895	×ÔÉí³µÁ¾	Road 1	0.24517405	0.689333618	0	0.738130927	0	0	17.3107	977.0938	655.7373	3.8313	0.7025	19	0.317135924	0.000732584	25.12319281	0.058034575
83.73055081	×ÔÉí³µÁ¾	Road 1	0.248462718	0.726249129	0	0.739341259	0	0	17.3138	977.0938	655.7373	3.8313	0.7025	20	0.319499895	0.000738045	25.12840125	0.058046607
83.74722544	×ÔÉí³µÁ¾	Road 1	0.252008668	0.765558887	0	0.740983069	0	0	17.3174	977.0938	655.7373	3.8314	0.7024	21	0.321150718	0.000741858	25.13375632	0.058058977
83.76434508	×ÔÉí³µÁ¾	Road 1	0.255847437	0.807234836	0	0.74180156	0	0	17.3213	977.0938	655.7373	3.8315	0.7023	22	0.322822691	0.00074572	25.13928293	0.058071744
83.78060845	×ÔÉí³µÁ¾	Road 1	0.259672174	0.846630156	0	0.741810024	0	0	17.3252	977.0938	655.7373	3.8315	0.7023	23	0.32389571	0.000748199	25.14455056	0.058083912
83.79729078	×ÔÉí³µÁ¾	Road 1	0.263756523	0.881390566	0	0.74180156	0	0	17.3288	977.0938	655.7373	3.8316	0.7022	24	0.322413482	0.000744775	25.14992917	0.058096336
83.81428249	×ÔÉí³µÁ¾	Road 1	0.268102557	0.920785618	0	0.74180156	0	0	17.3331	977.0938	655.7373	3.8317	0.7021	25	0.325216141	0.000751249	25.15545515	0.058109101
83.83055722	×ÔÉí³µÁ¾	Road 1	0.272432824	0.957863295	0	0.74180311	0	0	17.3372	977.0938	655.7373	3.8318	0.702	26	0.325943904	0.00075293	25.1607598	0.058121355
83.84723662	×ÔÉí³µÁ¾	Road 1	0.277053234	0.997246277	0	0.740973055	0	0	17.3419	977.0938	655.7373	3.8318	0.702	27	0.327703571	0.000756995	25.1662257	0.058133981
83.86424996	×ÔÉí³µÁ¾	Road 1	0.281941126	1.034271705	0	0.740139782	0	0	17.3464	977.0938	655.7373	3.8319	0.7019	28	0.327147894	0.000755712	25.17179158	0.058146839
83.8806123	×ÔÉí³µÁ¾	Road 1	0.286831088	1.075877166	0	0.740149796	0	0	17.3517	977.0938	655.7373	3.832	0.7018	29	0.331552619	0.000765887	25.17721655	0.05815937
83.89728474	×ÔÉí³µÁ¾	Road 1	0.291984814	1.112819445	0	0.739322782	0	0	17.3565	977.0938	655.7373	3.8321	0.7017	30	0.329610525	0.0007614	25.18271196	0.058172065
83.91456603	×ÔÉí³µÁ¾	Road 1	0.297503868	1.149717093	0	0.738501012	0	0	17.3616	977.0947	655.7373	3.8312	0.7026	31	0.329816026	0.000761875	25.18841161	0.058185231
83.93061569	×ÔÉí³µÁ¾	Road 1	0.302814319	1.191154432	0	0.736850739	0	0	17.3674	977.0947	655.7373	3.8313	0.7025	32	0.335379329	0.000774726	25.19379434	0.058197665
83.94729582	×ÔÉí³µÁ¾	Road 1	0.30850379	1.227933204	0	0.736029208	0	0	17.3725	977.0947	655.7373	3.8314	0.7024	33	0.332598537	0.000768303	25.19934212	0.05821048
83.96451003	×ÔÉí³µÁ¾	Road 1	0.314594916	1.273834491	0	0.735200644	0	0	17.3798	977.0947	655.7373	3.8316	0.7022	34	0.338732499	0.000782472	25.20517314	0.05822395
83.98060222	×ÔÉí³µÁ¾	Road 1	0.320432408	1.305911779	0	0.734378934	0	0	17.3848	977.0947	655.7373	3.8316	0.7022	35	0.332377025	0.000767791	25.21052181	0.058236305
83.99725926	×ÔÉí³µÁ¾	Road 1	0.326644217	1.342525864	0	0.733551741	0	0	17.3907	977.0947	655.7373	3.8318	0.7021	36	0.335596792	0.000775229	25.21611186	0.058249218
84.01446027	×ÔÉí³µÁ¾	Road 1	0.333233602	1.379092312	0	0.73272866	0	0	17.3967	977.0947	655.7373	3.8319	0.7019	37	0.335726213	0.000775528	25.22188669	0.058262558
84.03220049	×ÔÉí³µÁ¾	Road 1	0.340254436	1.424728918	0	0.731491566	0	0	17.4045	977.0947	655.7373	3.832	0.7018	38	0.342247703	0.000790592	25.22795824	0.058276584
84.04726742	×ÔÉí³µÁ¾	Road 1	0.346360315	1.458902085	0	0.730669796	0	0	17.4105	977.0947	655.7373	3.8321	0.7017	39	0.339607744	0.000784494	25.23307508	0.058288403
84.06394645	×ÔÉí³µÁ¾	Road 1	0.353361905	1.511221576	0	0.729421139	0	0	17.42	977.0957	655.7373	3.8313	0.7025	40	0.352011749	0.000813147	25.2389463	0.058301966
84.08061816	×ÔÉí³µÁ¾	Road 1	0.36050766	1.543016374	0	0.728589416	0	0	17.426	977.0957	655.7373	3.8314	0.7024	41	0.337170003	0.000778863	25.2445675	0.058314951
84.09720593	×ÔÉí³µÁ¾	Road 1	0.367784648	1.579306126	0	0.727767825	0	0	17.432	977.0957	655.7373	3.8315	0.7023	42	0.341799451	0.000789557	25.25023719	0.058328048
84.11385087	×ÔÉí³µÁ¾	Road 1	0.375222877	1.608753777	0	0.72694087	0	0	17.4387	977.0957	655.7373	3.8316	0.7022	43	0.336883774	0.000778202	25.2558446	0.058341001
84.13061312	×ÔÉí³µÁ¾	Road 1	0.382871545	1.642691767	0	0.726110637	0	0	17.4454	977.0957	655.7373	3.8318	0.702	44	0.341221982	0.000788223	25.26156425	0.058354213
84.1472654	×ÔÉí³µÁ¾	Road 1	0.390658152	1.683360279	0	0.725290596	0	0	17.4538	977.0957	655.7373	3.8319	0.7019	45	0.348191957	0.000804323	25.26736244	0.058367607
84.16426371	×ÔÉí³µÁ¾	Road 1	0.398787745	1.721732175	0	0.7244488	0	0	17.4618	977.0957	655.7373	3.8321	0.7017	46	0.346605122	0.000800658	25.27325414	0.058381217
84.18060405	×ÔÉí³µÁ¾	Road 1	0.406776585	1.760050642	0	0.723637223	0	0	17.47	977.0967	655.7373	3.8312	0.7026	47	0.34896954	0.00080612	25.27895642	0.058394389
84.19729958	×ÔÉí³µÁ¾	Road 1	0.41517909	1.811803007	0	0.722379982	0	0	17.4814	977.0967	655.7373	3.8314	0.7024	48	0.3619335	0.000836066	25.28499909	0.058408348
84.21426197	×ÔÉí³µÁ¾	Road 1	0.423864086	1.843253946	0	0.72198832	0	0	17.4885	977.0967	655.7373	3.8316	0.7022	49	0.343619978	0.000793762	25.29082771	0.058421812
84.23055246	×ÔÉí³µÁ¾	Road 1	0.432347197	1.874664545	0	0.721158266	0	0	17.4958	977.0967	655.7373	3.8317	0.7021	50	0.3455567	0.000798236	25.296457	0.058434816
84.24728831	×ÔÉí³µÁ¾	Road 1	0.441218484	1.908276272	0	0.720328033	0	0	17.5037	977.0967	655.7373	3.8319	0.702	51	0.347670987	0.00080312	25.30227557	0.058448257
84.26395708	×ÔÉí³µÁ¾	Road 1	0.450292445	1.959727693	0	0.718679488	0	0	17.516	977.0967	655.7373	3.8321	0.7017	52	0.366832102	0.000847382	25.30839021	0.058462381
84.28069697	×ÔÉí³µÁ¾	Road 1	0.459550524	1.990998173	0	0.718256295	0	0	17.5237	977.0977	655.7373	3.8312	0.7026	53	0.34737462	0.000802435	25.31420522	0.058475814
84.29719713	×ÔÉí³µÁ¾	Road 1	0.46881916	2.022228527	0	0.717427611	0	0	17.5315	977.0977	655.7373	3.8314	0.7024	54	0.34855048	0.000805152	25.31995636	0.058489099
84.31447585	×ÔÉí³µÁ¾	Road 1	0.478685534	2.055646491	0	0.716606021	0	0	17.54	977.0977	655.7373	3.8315	0.7023	55	0.350067237	0.000808655	25.32600507	0.058503072
84.33054274	×ÔÉí³µÁ¾	Road 1	0.488038627	2.095684576	0	0.715367198	0	0	17.5504	977.0977	655.7373	3.8317	0.7021	56	0.361000219	0.000833911	25.33180522	0.05851647
84.34721958	×ÔÉí³µÁ¾	Road 1	0.497911418	2.131222129	0	0.714537203	0	0	17.5598	977.0977	655.7373	3.8319	0.7019	57	0.355496768	0.000821198	25.33773379	0.058530165
84.36390338	×ÔÉí³µÁ¾	Road 1	0.50803494	2.184434795	0	0.713705599	0	0	17.5742	977.0977	655.7373	3.8322	0.7017	58	0.376467165	0.000869639	25.34401469	0.058544674
84.38059855	×ÔÉí³µÁ¾	Road 1	0.518237202	2.199926805	0	0.712878466	0	0	17.5785	977.0986	655.7373	3.8313	0.7026	59	0.334690037	0.000773134	25.3496024	0.058557582
84.39727466	×ÔÉí³µÁ¾	Road 1	0.528622435	2.241940713	0	0.712046683	0	0	17.5902	977.0986	655.7373	3.8315	0.7024	60	0.365792949	0.000844982	25.3557024	0.058571673
84.41423557	×ÔÉí³µÁ¾	Road 1	0.539434563	2.294902754	0	0.710396409	0	0	17.6053	977.0986	655.7373	3.8317	0.7021	61	0.379063438	0.000875637	25.36213166	0.058586524
84.43054476	×ÔÉí³µÁ¾	Road 1	0.549970946	2.325743651	0	0.709566355	0	0	17.6143	977.0986	655.7373	3.8319	0.7019	62	0.355844647	0.000822001	25.3679352	0.05859993
84.44719557	×ÔÉí³µÁ¾	Road 1	0.560870509	2.356547213	0	0.708736122	0	0	17.6234	977.0986	655.7373	3.8321	0.7018	63	0.355757586	0.0008218	25.37385885	0.058613614
84.46398751	×ÔÉí³µÁ¾	Road 1	0.572005938	2.387308931	0	0.707906067	0	0	17.6326	977.0996	655.7373	3.8313	0.7026	64	0.356119203	0.000822635	25.37983878	0.058627428
84.48052835	×ÔÉí³µÁ¾	Road 1	0.583146344	2.424631763	0	0.707484424	0	0	17.644	977.0996	655.7373	3.8315	0.7024	65	0.365774157	0.000844938	25.385889	0.058641404
84.49719896	×ÔÉí³µÁ¾	Road 1	0.59454672	2.461899233	0	0.706655741	0	0	17.6555	977.0996	655.7373	3.8317	0.7021	66	0.366350299	0.000846269	25.39199628	0.058655511
84.51404735	×ÔÉí³µÁ¾	Road 1	0.606232577	2.496920729	0	0.705817223	0	0	17.6666	977.0996	655.7373	3.8319	0.7019	67	0.363959215	0.000840746	25.3981284	0.058669677
84.53059443	×ÔÉí³µÁ¾	Road 1	0.617880226	2.534074903	0	0.704987228	0	0	17.6784	977.0996	655.7373	3.8321	0.7017	68	0.368521097	0.000851284	25.40422635	0.058683763
84.547261	×ÔÉí³µÁ¾	Road 1	0.629783734	2.571171999	0	0.70373702	0	0	17.6905	977.1006	655.7373	3.8313	0.7025	69	0.369099343	0.000852619	25.41037797	0.058697973
84.5643887	×ÔÉí³µÁ¾	Road 1	0.642182441	2.606032133	0	0.702923715	0	0	17.702	977.1006	655.7373	3.8315	0.7023	70	0.36580025	0.000844999	25.41664329	0.058712446
84.58055053	×ÔÉí³µÁ¾	Road 1	0.654057721	2.645184016	0	0.701673567	0	0	17.7151	977.1006	655.7373	3.8318	0.702	71	0.375541044	0.0008675	25.42271272	0.058726466
84.59722334	×ÔÉí³µÁ¾	Road 1	0.666469357	2.679926133	0	0.700846434	0	0	17.727	977.1006	655.7373	3.832	0.7018	72	0.368790622	0.000851906	25.42886149	0.05874067
84.61430339	×ÔÉí³µÁ¾	Road 1	0.679348725	2.714612889	0	0.70001334	0	0	17.739	977.1016	655.7373	3.8312	0.7026	73	0.368451874	0.000851124	25.43515467	0.058755207
84.63061807	×ÔÉí³µÁ¾	Road 1	0.691827476	2.75356307	0	0.698776245	0	0	17.7526	977.1016	655.7373	3.8315	0.7023	74	0.37782664	0.00087278	25.44131879	0.058769446
84.64727438	×ÔÉí³µÁ¾	Road 1	0.704727438	2.788124084	0	0.697522819	0	0	17.765	977.1016	655.7373	3.8317	0.7021	75	0.371371254	0.000857868	25.44750447	0.058783735
84.6645751	×ÔÉí³µÁ¾	Road 1	0.718292298	2.82262845	0	0.696695864	0	0	17.7774	977.1016	655.7373	3.8319	0.7019	76	0.370305737	0.000855406	25.45391102	0.058798534
84.68057271	×ÔÉí³µÁ¾	Road 1	0.731007628	2.861376715	0	0.695462584	0	0	17.7916	977.1025	655.7373	3.8312	0.7026	77	0.381743874	0.000881828	25.46001801	0.058812642
84.6971876	×ÔÉí³µÁ¾	Road 1	0.744372269	2.895758343	0	0.694622397	0	0	17.8044	977.1025	655.7373	3.8315	0.7024	78	0.374000177	0.00086394	25.46623198	0.058826996
84.71426948	×ÔÉí³µÁ¾	Road 1	0.758366901	2.949363041	0	0.692965209	0	0	17.8247	977.1025	655.7373	3.8318	0.702	79	0.402197592	0.000929076	25.47310228	0.058842866
84.73054494	×ÔÉí³µÁ¾	Road 1	0.771826732	2.977205658	0.054606039	0.603807092	0	0.011764706	17.8363	977.1025	655.7373	3.832	0.7018	80	0.366965024	0.000847689	25.4790748	0.058856663
84.74725953	×ÔÉí³µÁ¾	Road 1	0.785764451	3.001915026	4.43E-05	0.582624793	0	0.011764706	17.8479	977.1035	655.7373	3.8313	0.7026	81	0.361541437	0.000835161	25.48511782	0.058870622
84.76415411	×ÔÉí³µÁ¾	Road 1	0.799992309	3.031759858	-0.001329976	0.589619815	0	0.011764706	17.8621	977.1035	655.7373	3.8315	0.7023	82	0.369636422	0.00085386	25.49136267	0.058885048
84.81414174	×ÔÉí³µÁ¾	Road 1	0.843130654	3.106729531	-0.001354484	0.594896197	0	0.011764706	17.8979	977.1035	655.7373	3.8322	0.7017	83	0.363943712	0.00084071	25.50955535	0.058927073
84.83056052	×ÔÉí³µÁ¾	Road 1	0.857536088	3.158550882	-0.001387248	0.594035208	0	0.011764706	17.9232	977.1045	655.7373	3.8317	0.7022	84	0.410012422	0.000947129	25.51628726	0.058942624
84.84727475	×ÔÉí³µÁ¾	Road 1	0.872316651	3.183517098	-0.00152844	0.593196034	0	0.011764706	17.9355	977.1045	655.7373	3.8319	0.702	85	0.365694326	0.000844754	25.52239955	0.058956743
84.86405166	×ÔÉí³µÁ¾	Road 1	0.887268845	3.208451557	-0.00160124	0.592357337	0	0.011764706	17.948	977.1045	655.7373	3.8321	0.7017	86	0.366003915	0.000845469	25.52853997	0.058970927
84.88058994	×ÔÉí³µÁ¾	Road 1	0.902179869	3.245784044	-0.001694469	0.591517806	0	0.011764706	17.9668	977.1045	655.7373	3.8325	0.7014	87	0.388199144	0.00089674	25.53496011	0.058985758
84.89736501	×ÔÉí³µÁ¾	Road 1	0.917362304	3.258212757	-0.001788548	0.591110766	0	0.011764706	17.9731	977.1055	655.7373	3.8316	0.7023	88	0.346163778	0.000799638	25.54076704	0.058999172
84.91426215	×ÔÉí³µÁ¾	Road 1	0.932829921	3.295434952	-0.001869326	0.589841306	0	0.011764706	17.9922	977.1055	655.7373	3.8319	0.7019	89	0.388012533	0.000896309	25.54732334	0.059014317
84.93054054	×ÔÉí³µÁ¾	Road 1	0.947859095	3.323732686	-0.001966836	0.588593006	0	0.011764706	18.0069	977.1055	655.7373	3.8322	0.7017	90	0.375570733	0.000867568	25.55343703	0.05902844
84.94717853	×ÔÉí³µÁ¾	Road 1	0.963350755	3.351967335	-0.002057296	0.587754071	0	0.011764706	18.0218	977.1055	655.7373	3.8325	0.7014	91	0.375021853	0.0008663	25.55967664	0.059042853
84.96423732	×ÔÉí³µÁ¾	Road 1	0.979367805	3.380156493	-0.002153541	0.586914539	0	0.011764706	18.0367	977.1064	655.7373	3.8318	0.7021	92	0.37435954	0.000864771	25.56606276	0.059057605
84.98052194	×ÔÉí³µÁ¾	Road 1	0.994801152	3.411810422	-0.002265351	0.586074233	0	0.011764706	18.0537	977.1064	655.7373	3.8321	0.7018	93	0.383582735	0.000886076	25.57230926	0.059072034
84.99726659	×ÔÉí³µÁ¾	Road 1	1.010801136	3.439900875	-0.002354942	0.585234821	0	0.011764706	18.0689	977.1064	655.7373	3.8324	0.7015	94	0.376421417	0.000869533	25.5786123	0.059086594
85.06422504	×ÔÉí³µÁ¾	Road 1	1.076765698	3.546564174	-0.002453519	0.582713127	0	0.011764706	18.1281	977.1074	655.7373	3.8325	0.7014	95	0.375673877	0.000867807	25.60376684	0.059144701
85.08054338	×ÔÉí³µÁ¾	Road 1	1.09307065	3.597045064	-0.002573678	0.581451476	0	0.011764706	18.1569	977.1084	655.7373	3.832	0.7019	96	0.423465626	0.000978206	25.6106771	0.059160664
85.09731553	×ÔÉí³µÁ¾	Road 1	1.109942389	3.62137742	-0.002970784	0.580613613	0	0.011764706	18.1709	977.1084	655.7373	3.8323	0.7016	97	0.373416513	0.000862592	25.61694009	0.059175132
85.1142156	×ÔÉí³µÁ¾	Road 1	1.127065026	3.647410297	-0.00306253	0.579773605	0	0.011764706	18.1861	977.1094	655.7373	3.8315	0.7023	98	0.37675017	0.000870293	25.6233072	0.05918984
85.13061459	×ÔÉí³µÁ¾	Road 1	1.143790492	3.671669912	-0.003164031	0.578944564	0	0.011764706	18.2003	977.1094	655.7373	3.8318	0.7021	99	0.375342403	0.000867041	25.62946244	0.059204058
85.14717706	×ÔÉí³µÁ¾	Road 1	1.160818003	3.701080227	-0.003261706	0.578105152	0	0.011764706	18.2177	977.1094	655.7373	3.8321	0.7018	100	0.38535629	0.000890173	25.63584489	0.059218802
85.16386233	×ÔÉí³µÁ¾	Road 1	1.178103815	3.729572582	-0.003355212	0.641047359	0	0	18.2342	977.1104	655.7373	3.8314	0.7024	101	0.38383613	0.000886661	25.6422493	0.059233596
85.18066746	×ÔÉí³µÁ¾	Road 1	1.195747209	3.779572392	-0.003460951	0.682375014	0	0	18.2593	977.1104	655.7373	3.8319	0.702	102	0.425935031	0.00098391	25.64940719	0.059250131
85.19725339	×ÔÉí³µÁ¾	Road 1	1.213295117	3.80879817	-0.003562478	0.674115419	0	0	18.274	977.1104	655.7373	3.8322	0.7017	103	0.387401353	0.000894897	25.65583261	0.059264973
85.21388991	×ÔÉí³µÁ¾	Road 1	1.231030105	3.837699509	-0.003674685	0.669616163	0	0	18.2889	977.1113	655.7373	3.8315	0.7024	104	0.387247351	0.000894541	25.66227505	0.059279855
85.2305202	×ÔÉí³µÁ¾	Road 1	1.248900669	3.868486118	-0.003807054	0.66711694	0	0	18.305	977.1113	655.7373	3.8318	0.7021	105	0.391731349	0.000904899	25.66878966	0.059294904
85.24719557	×ÔÉí³µÁ¾	Road 1	1.267018553	3.911419916	-0.003926591	0.665477574	0	0	18.3276	977.1123	655.7373	3.8312	0.7027	106	0.416974959	0.000963212	25.67574287	0.059310966
85.26382586	×ÔÉí³µÁ¾	Road 1	1.285219391	3.939981365	-0.00404628	0.664648473	0	0	18.3429	977.1123	655.7373	3.8315	0.7024	107	0.388909698	0.000898381	25.68221055	0.059325906
85.28054338	×ÔÉí³µÁ¾	Road 1	1.303723907	3.984815454	-0.004170748	0.663817942	0	0	18.3671	977.1123	655.7373	3.8322	0.702	108	0.422827854	0.000976732	25.68927919	0.059342235
85.29729353	×ÔÉí³µÁ¾	Road 1	1.322330856	3.999069786	-0.004295324	0.663818598	0	0	18.3749	977.1133	655.7373	3.8314	0.7028	109	0.360461809	0.000832667	25.69531697	0.059356182
85.31383255	×ÔÉí³µÁ¾	Road 1	1.340899593	4.041804028	-0.004437171	0.663398325	0	0	18.3983	977.1133	655.7373	3.8318	0.7016	110	0.421210687	0.000972997	25.70228338	0.059372275
85.330553	×ÔÉí³µÁ¾	Road 1	1.359879705	4.08651495	-0.004630265	0.662568867	0	0	18.4232	977.1143	655.7373	3.8313	0.7021	111	0.425702084	0.000983372	25.70940132	0.059388717
85.34723974	×ÔÉí³µÁ¾	Road 1	1.378953275	4.114936066	-0.004826266	0.661729455	0	0	18.4391	977.1143	655.7373	3.8316	0.7018	112	0.392364256	0.000906361	25.7159486	0.059403841
85.36391255	×ÔÉí³µÁ¾	Road 1	1.398142465	4.143338728	-0.005060034	0.661720872	0.011764706	0	18.4552	977.1143	655.7373	3.8319	0.7015	113	0.393014645	0.000907864	25.72250125	0.059418978
85.38059598	×ÔÉí³µÁ¾	Road 1	1.417541376	4.185952806	-0.005351493	0.662122667	0.011764706	0	18.4795	977.1152	655.7373	3.8313	0.7021	114	0.42448771	0.000980567	25.72958317	0.059435337
85.39726219	×ÔÉí³µÁ¾	Road 1	1.437061305	4.216420555	-0.005639418	0.662534595	0.011764706	0	18.497	977.1152	655.7373	3.8316	0.7018	115	0.39916694	0.000922076	25.73623577	0.059450705
85.41389834	×ÔÉí³µÁ¾	Road 1	1.456677504	4.244871283	-0.005955521	0.662926495	0.019607844	0	18.5134	977.1162	655.7373	3.831	0.7024	116	0.395541605	0.000913701	25.74281606	0.059465905
85.43053523	×ÔÉí³µÁ¾	Road 1	1.476492031	4.287599516	-0.006370913	0.663738728	0.019607844	0	18.5383	977.1162	655.7373	3.8314	0.702	117	0.42803727	0.000988766	25.74993726	0.059482355
85.44717871	×ÔÉí³µÁ¾	Road 1	1.49644627	4.316119766	-0.006808474	0.664552033	0.027450981	0	18.5551	977.1162	655.7373	3.8317	0.7017	118	0.397275536	0.000917706	25.75654931	0.059497629
85.46391603	×ÔÉí³µÁ¾	Road 1	1.5167123	4.358983612	-0.007296578	0.665765524	0.027450981	0	18.5804	977.1172	655.7373	3.8312	0.7022	119	0.429901362	0.000993072	25.76374471	0.05951425
85.48055401	×ÔÉí³µÁ¾	Road 1	1.536990366	4.387613297	-0.007908795	0.666571438	0.035294119	0	18.5974	977.1172	655.7373	3.8315	0.7019	120	0.399159513	0.000922058	25.77038592	0.059529591
85.49733642	×ÔÉí³µÁ¾	Road 1	1.557578167	4.416296625	-0.008489397	0.667785227	0.035294119	0	18.6145	977.1182	655.7373	3.8308	0.7026	121	0.399367021	0.000922538	25.77708826	0.059545074
85.51393372	×ÔÉí³µÁ¾	Road 1	1.578137606	4.459399939	-0.009089764	0.668579876	0.035294119	0	18.6404	977.1182	655.7373	3.8313	0.7021	122	0.434284096	0.001003196	25.7842962	0.059561724
85.53057023	×ÔÉí³µÁ¾	Road 1	1.598878586	4.488170385	-0.009759542	0.669373572	0.043137256	0	18.6578	977.1191	655.7373	3.8307	0.7028	123	0.40176891	0.000928086	25.79098023	0.059577164
85.54717083	×ÔÉí³µÁ¾	Road 1	1.619707668	4.516988468	-0.010317585	0.670588136	0.043137256	0	18.6753	977.1191	655.7373	3.831	0.7024	124	0.402680652	0.000930192	25.79766497	0.059592606
85.5638418	×ÔÉí³µÁ¾	Road 1	1.640768259	4.547912407	-0.010842596	0.671372056	0.043137256	0	18.6942	977.1191	655.7373	3.8313	0.7021	125	0.408030064	0.000942549	25.80446723	0.059608319
85.58093871	×ÔÉí³µÁ¾	Road 1	1.662602168	4.597442722	-0.011385122	0.67172581	0.043137256	0	18.7247	977.1201	655.7373	3.8309	0.7016	126	0.450239838	0.001040054	25.81216494	0.059626101
85.59735676	×ÔÉí³µÁ¾	Road 1	1.683701018	4.626362944	-0.011821491	0.672119319	0.043137256	0	18.7426	977.1211	655.7373	3.8302	0.7022	127	0.406188658	0.000938296	25.81883377	0.059641506
85.61389065	×ÔÉí³µÁ¾	Road 1	1.705081563	4.655287027	-0.012220232	0.672082484	0.043137256	0	18.7606	977.1211	655.7373	3.8306	0.7019	128	0.40636834	0.000938711	25.82555261	0.059657027
85.63055869	×ÔÉí³µÁ¾	Road 1	1.726779076	4.686276197	-0.012578257	0.672046065	0.043137256	0	18.7801	977.1211	655.7373	3.8309	0.7015	129	0.411494886	0.000950553	25.83241143	0.05967287
85.64723149	×ÔÉí³µÁ¾	Road 1	1.748683695	4.729655457	-0.012842529	0.671597898	0.043137256	0	18.8076	977.1221	655.7373	3.8304	0.702	130	0.442643249	0.001022506	25.83979153	0.059689918
85.66387974	×ÔÉí³µÁ¾	Road 1	1.770689692	4.75855422	-0.013049487	0.671580195	0.043137256	0	18.826	977.1221	655.7373	3.8308	0.7017	131	0.408177877	0.000942891	25.84658698	0.059705616
85.68055218	×ÔÉí³µÁ¾	Road 1	1.792928419	4.801901722	-0.013227907	0.671553075	0.043137256	0	18.8539	977.123	655.7373	3.8303	0.7022	132	0.44475363	0.001027381	25.85400211	0.059722745
85.69721839	×ÔÉí³µÁ¾	Road 1	1.815302136	4.832855701	-0.013423453	0.671124518	0.043137256	0	18.874	977.124	655.7373	3.8297	0.7028	133	0.414910951	0.000958444	25.8609171	0.059738719
85.7138835	×ÔÉí³µÁ¾	Road 1	1.83780797	4.861714554	-0.013647043	0.670697749	0.043137256	0	18.8928	977.124	655.7373	3.83	0.7024	134	0.410354161	0.000947918	25.8677557	0.059754516
85.73048922	×ÔÉí³µÁ¾	Road 1	1.860433179	4.904979658	-0.013968468	0.669620395	0.043137256	0	18.9213	977.125	655.7373	3.8296	0.7019	135	0.448103703	0.00103512	25.87519678	0.059771705
85.74721701	×ÔÉí³µÁ¾	Road 1	1.883358574	4.933791304	-0.014262568	0.669842958	0.043137256	0	18.9404	977.125	655.7373	3.8299	0.7016	136	0.41159792	0.000950791	25.88208191	0.059787609
85.76383154	×ÔÉí³µÁ¾	Road 1	1.906271044	4.964625549	-0.01457169	0.668766201	0.043137256	0	18.961	977.126	655.7374	3.8283	0.7022	137	0.417990664	0.000965558	25.88902662	0.059803652
85.78047465	×ÔÉí³µÁ¾	Road 1	1.929355909	4.993386984	-0.014929611	0.668569565	0.043137256	0	18.9804	977.126	655.7373	3.8287	0.7018	138	0.413196124	0.000954483	25.89590349	0.059819537
85.79720354	×ÔÉí³µÁ¾	Road 1	1.952702783	5.024167585	-0.015293345	0.667922497	0.043137256	0	19.0013	977.127	655.7374	3.8281	0.7024	139	0.418721165	0.000967246	25.90290823	0.059835718
85.81386499	×ÔÉí³µÁ¾	Road 1	1.976221115	5.081552267	-0.015691614	0.667086005	0.043137256	0	19.0406	977.1279	655.7374	3.8278	0.7017	140	0.489918268	0.001131711	25.91107098	0.059854574
85.83057445	×ÔÉí³µÁ¾	Road 1	1.99987373	5.095879984	-0.016207891	0.666660011	0.043137256	0	19.0505	977.1279	655.7374	3.828	0.7015	141	0.377342819	0.000871662	25.91737618	0.059869139
85.84724542	×ÔÉí³µÁ¾	Road 1	2.023642391	5.132704353	-0.016705437	0.666214526	0.043137256	0	19.076	977.1289	655.7374	3.8275	0.702	142	0.4375487	0.001010737	25.92467054	0.059885989
85.86387131	×ÔÉí³µÁ¾	Road 1	2.047497777	5.165401983	-0.017231381	0.665788531	0.043137256	0	19.0989	977.1299	655.7374	3.8269	0.7026	143	0.427688201	0.00098796	25.93178123	0.059902415
85.88055878	×ÔÉí³µÁ¾	Road 1	2.071668581	5.214385557	-0.01786818	0.664926231	0.043137256	0	19.1335	977.1309	655.7374	3.8266	0.702	144	0.472209555	0.001090804	25.93966122	0.059920617
85.89730563	×ÔÉí³µÁ¾	Road 1	2.096058189	5.242931128	-0.0184309	0.664071023	0.043137256	0	19.1538	977.1309	655.7374	3.827	0.7016	145	0.417799301	0.000965116	25.94665804	0.05993678
85.91389156	×ÔÉí³µÁ¾	Road 1	2.120344846	5.271453094	-0.018998794	0.664046109	0.050980393	0	19.1743	977.1318	655.7374	3.8263	0.7022	146	0.419128143	0.000968186	25.95360967	0.059952838
85.93057353	×ÔÉí³µÁ¾	Road 1	2.144913728	5.302010107	-0.019638149	0.664002597	0.05882353	0	19.1963	977.1318	655.7374	3.8267	0.7018	147	0.42492598	0.000981579	25.96069827	0.059969213
85.94716093	×ÔÉí³µÁ¾	Road 1	2.169569093	5.351008701	-0.02021686	0.666450083	0.074509807	0	19.2318	977.1328	655.7374	3.8264	0.7012	148	0.477594578	0.001103243	25.96862032	0.059987513
85.98060551	×ÔÉí³µÁ¾	Road 1	2.219680849	5.394066954	-0.020751471	0.668898106	0.082352944	0	19.2631	977.1338	655.7374	3.826	0.7016	149	0.40172934	0.000927995	25.98205599	0.060018549
85.9972479	×ÔÉí³µÁ¾	Road 1	2.244893157	5.453805113	-0.021309495	0.672165692	0.098039217	0	19.3068	977.1357	655.7374	3.8248	0.7017	150	0.510671912	0.001179652	25.99055479	0.060038182
86.01381477	×ÔÉí³µÁ¾	Road 1	2.270134068	5.484878397	-0.022028172	0.675616801	0.121568628	0	19.3296	977.1357	655.7374	3.8253	0.7012	151	0.431313429	0.000996334	25.99770031	0.060054688
86.03056272	×ÔÉí³µÁ¾	Road 1	2.29578677	5.514091301	-0.022317206	0.679712236	0.137254909	0	19.351	977.1367	655.7374	3.8237	0.7018	152	0.425786148	0.000983566	26.00483135	0.06007116
86.04717944	×ÔÉí³µÁ¾	Road 1	2.321374501	5.543561697	-0.022601437	0.685479999	0.152941182	0	19.3725	977.1377	655.7374	3.8231	0.7023	153	0.427856221	0.000988348	26.01194092	0.060087584
86.06425363	×ÔÉí³µÁ¾	Road 1	2.347878881	5.588305664	-0.02296935	0.694129646	0.160784319	0	19.4049	977.1387	655.7374	3.8227	0.7017	154	0.46951538	0.001084581	26.01995751	0.060106102
86.08054815	×ÔÉí³µÁ¾	Road 1	2.373378143	5.633632851	-0.023468586	0.699048758	0.168627456	0	19.4377	977.1396	655.7374	3.8223	0.7021	155	0.478703521	0.001105805	26.02775776	0.06012412
86.09728877	×ÔÉí³µÁ¾	Road 1	2.399717331	5.664131927	-0.024020707	0.705161452	0.168627456	0	19.4596	977.1396	655.7374	3.8227	0.7017	156	0.432993049	0.001000214	26.03500633	0.060140865
86.11420607	×ÔÉí³µÁ¾	Road 1	2.426488966	5.697001648	-0.024689941	0.708385408	0.176470593	0	19.4833	977.1406	655.7374	3.8222	0.7013	157	0.439692725	0.00101569	26.04244474	0.060158047
86.13059296	×ÔÉí³µÁ¾	Road 1	2.452632305	5.743372107	-0.025561687	0.714465022	0.192156866	0	19.5167	977.1416	655.7374	3.8218	0.7017	158	0.484554665	0.001119321	26.05038509	0.06017639
86.14723644	×ÔÉí³µÁ¾	Road 1	2.479329235	5.774569845	-0.026299577	0.719351113	0.20784314	0	19.539	977.1426	655.7374	3.8212	0.7013	159	0.438203695	0.001012251	26.05767832	0.060193237
86.16556498	×ÔÉí³µÁ¾	Road 1	2.508958272	5.819586754	-0.026927965	0.726700485	0.215686277	0	19.5712	977.1436	655.7374	3.8208	0.7016	160	0.468310152	0.001081796	26.06626176	0.060213065
86.18058389	×ÔÉí³µÁ¾	Road 1	2.533369771	5.851384878	-0.027457817	0.731144249	0.23137255	0	19.5939	977.1445	655.7374	3.8203	0.7022	161	0.452281761	0.001044771	26.07305454	0.060228756
86.19717935	×ÔÉí³µÁ¾	Road 1	2.560491591	5.883448648	-0.027784077	0.737268031	0.239215687	0	19.6167	977.1455	655.7374	3.8197	0.7018	162	0.443728365	0.001025013	26.08041842	0.060245767
86.21384409	×ÔÉí³µÁ¾	Road 1	2.587951916	5.932115078	-0.028189166	0.746221721	0.247058824	0	19.6512	977.1465	655.7375	3.8194	0.7021	163	0.495235484	0.001143994	26.08867139	0.060264831
86.23054696	×ÔÉí³µÁ¾	Road 1	2.615627514	5.96497407	-0.029366968	0.753698468	0.262745112	0	19.6743	977.1475	655.7375	3.8178	0.7027	164	0.447525877	0.001033785	26.09614635	0.060282098
86.24726961	×ÔÉí³µÁ¾	Road 1	2.643490448	5.998242903	-0.030586082	0.762175381	0.262745112	0	19.6976	977.1475	655.7375	3.8182	0.7013	165	0.449493283	0.001038329	26.10366308	0.060299462
86.26387974	×ÔÉí³µÁ¾	Road 1	2.671410994	6.051366949	-0.031866077	0.774666429	0.262745112	0	19.7344	977.1494	655.7375	3.817	0.7026	166	0.513589195	0.001186391	26.11219386	0.060319168
86.28047264	×ÔÉí³µÁ¾	Road 1	2.699460729	6.085679054	-0.033285394	0.782261729	0.262745112	0	19.758	977.1504	655.7375	3.8164	0.7022	167	0.455780964	0.001052854	26.11975658	0.060336638
86.29716084	×ÔÉí³µÁ¾	Road 1	2.727843875	6.122848034	-0.034678046	0.789829195	0.262745112	0	19.7834	977.1514	655.7375	3.8159	0.7027	168	0.465116612	0.001074419	26.12751854	0.060354568
86.31383548	×ÔÉí³µÁ¾	Road 1	2.756366342	6.157907295	-0.036349591	0.796928167	0.262745112	0	19.8073	977.1514	655.7375	3.8163	0.7013	169	0.459466629	0.001061368	26.13517998	0.060372266
86.33062375	×ÔÉí³µÁ¾	Road 1	2.785331099	6.211069536	-0.038521301	0.805495739	0.262745112	0	19.8433	977.1533	655.7375	3.815	0.7026	170	0.517552635	0.001195547	26.1438688	0.060392337
86.34726357	×ÔÉí³µÁ¾	Road 1	2.814217137	6.249452162	-0.040604532	0.811383486	0.262745112	0	19.8693	977.1543	655.7375	3.8145	0.7021	171	0.472802219	0.001092173	26.15173614	0.06041051
86.36390668	×ÔÉí³µÁ¾	Road 1	2.843275967	6.285589457	-0.042817548	0.817712367	0.262745112	0	19.8936	977.1553	655.7375	3.814	0.7026	172	0.46649401	0.001077601	26.15950006	0.060428445
86.38051864	×ÔÉí³µÁ¾	Road 1	2.872532973	6.340325403	-0.045295428	0.82610321	0.262745112	0	19.9305	977.1563	655.7375	3.8127	0.702	173	0.529075557	0.001222165	26.16828904	0.060448748
86.3972402	×ÔÉí³µÁ¾	Road 1	2.902154018	6.377142477	-0.04737395	0.830453753	0.262745112	0	19.9552	977.1572	655.7375	3.8122	0.7025	174	0.470591868	0.001087067	26.17615807	0.060466925
86.4138221	×ÔÉí³µÁ¾	Road 1	2.931710643	6.416867065	-0.049219407	0.83565706	0.262745112	0	19.9818	977.1582	655.7375	3.8117	0.702	175	0.482347631	0.001114223	26.18415631	0.060485401
86.43061697	×ÔÉí³µÁ¾	Road 1	2.961908407	6.472926092	-0.051074356	0.841989756	0.254901975	0	20.0194	977.1602	655.7375	3.8104	0.7023	176	0.536252899	0.001238744	26.1931626	0.060506206
86.44723443	×ÔÉí³µÁ¾	Road 1	2.991960721	6.510522938	-0.052511793	0.845267892	0.254901975	0	20.0446	977.1611	655.7376	3.8099	0.7028	177	0.477566138	0.001103178	26.20109854	0.060524538
86.46388304	×ÔÉí³µÁ¾	Road 1	3.02234395	6.569893742	-0.053649709	0.849457741	0.254901975	0	20.0846	977.1631	655.7376	3.8086	0.7031	178	0.552656902	0.001276637	26.21029951	0.060545792
86.4804939	×ÔÉí³µÁ¾	Road 1	3.052845979	6.610573626	-0.054527011	0.852026999	0.254901975	0	20.112	977.1641	655.7376	3.8072	0.7026	179	0.490892208	0.001133961	26.21845365	0.060564628
86.49714544	×ÔÉí³µÁ¾	Road 1	3.083598969	6.648677731	-0.055042058	0.855144441	0.254901975	0	20.1378	977.165	655.7376	3.8067	0.7021	180	0.482816929	0.001115307	26.2264933	0.0605832
86.5138681	×ÔÉí³µÁ¾	Road 1	3.114749926	6.706077862	-0.055600338	0.85889256	0.254901975	0	20.1767	977.167	655.7377	3.8054	0.7024	181	0.55023196	0.001271036	26.23569464	0.060604455
86.5471459	×ÔÉí³µÁ¾	Road 1	3.177375266	6.774823523	-0.056310207	0.864105821	0.262745112	0	20.2235	977.1699	655.7377	3.8033	0.7035	182	0.47302826	0.001092695	26.25143598	0.060640817
86.56445872	×ÔÉí³µÁ¾	Road 1	3.21020926	6.827450609	-0.057039659	0.868130863	0.262745112	0	20.2537	977.1709	655.7377	3.8019	0.7029	183	0.531766054	0.00122838	26.26064235	0.060662084
86.58059965	×ÔÉí³µÁ¾	Road 1	3.241058096	6.880383253	-0.058655508	0.873671293	0.270588249	0	20.2955	977.1738	655.7377	3.7997	0.7041	184	0.547757727	0.00126532	26.26948367	0.060682507
86.59721527	×ÔÉí³µÁ¾	Road 1	3.272995267	6.919620752	-0.059460804	0.877855301	0.278431386	0	20.3223	977.1748	655.7377	3.7992	0.7036	185	0.494633621	0.001142604	26.27770231	0.060701492
86.61382613	×ÔÉí³µÁ¾	Road 1	3.305197094	6.978963661	-0.06032975	0.886020362	0.286274523	0	20.3628	977.1768	655.7377	3.798	0.7029	186	0.568831731	0.001314001	26.2871511	0.060723319
86.63047548	×ÔÉí³µÁ¾	Road 1	3.337658246	7.018902826	-0.061249793	0.893065333	0.301960796	0	20.39	977.1787	655.7378	3.7956	0.7033	187	0.499684531	0.001154271	26.29547052	0.060742537
86.64715268	×ÔÉí³µÁ¾	Road 1	3.370360571	7.059238529	-0.061992522	0.901308	0.309803933	0	20.4173	977.1797	655.7378	3.7951	0.7028	188	0.502032976	0.001159696	26.30384302	0.060761877
86.66377637	×ÔÉí³µÁ¾	Road 1	3.403200708	7.111808968	-0.062755689	0.913059354	0.34117648	0	20.4488	977.1816	655.7378	3.7937	0.7032	189	0.548955909	0.001268088	26.3129687	0.060782958
86.68058847	×ÔÉí³µÁ¾	Road 1	3.436677534	7.168443489	-0.063554257	0.935336411	0.36470589	0	20.4904	977.1846	655.7378	3.7905	0.7044	190	0.563618062	0.001301958	26.3224443	0.060804846
86.69718027	×ÔÉí³µÁ¾	Road 1	3.469926764	7.214241028	-0.064124592	0.953898311	0.380392164	0	20.5203	977.1855	655.7379	3.7901	0.7029	191	0.527653241	0.001218879	26.33119901	0.06082507
86.71380249	×ÔÉí³µÁ¾	Road 1	3.503556502	7.283446312	-0.064565629	0.986795247	0.411764711	0	20.5646	977.1885	655.7379	3.788	0.7041	192	0.617463651	0.001426341	26.34146263	0.060848779
86.73062448	×ÔÉí³µÁ¾	Road 1	3.53780308	7.328957176	-0.064919911	1.011072397	0.435294122	0	20.5929	977.1904	655.7379	3.7865	0.7045	193	0.527824397	0.001219274	26.35034169	0.060869289
86.74720162	×ÔÉí³µÁ¾	Road 1	3.571766749	7.375774384	-0.065127179	1.037937522	0.450980395	0	20.6215	977.1924	655.7379	3.7841	0.705	194	0.536814112	0.001240041	26.35924053	0.060889846
86.76521675	×ÔÉí³µÁ¾	Road 1	3.60904134	7.448654938	-0.065394305	1.081862807	0.474509805	0	20.6647	977.1943	655.7379	3.7829	0.7042	195	0.617074399	0.001425442	26.37035721	0.060915525
86.78044386	×ÔÉí³µÁ¾	Road 1	3.640761026	7.499182606	-0.065662161	1.113690972	0.498039216	0	20.6937	977.1963	655.738	3.7815	0.7046	196	0.572652153	0.001322826	26.37907705	0.060935668
86.7971383	×ÔÉí³µÁ¾	Road 1	3.675779408	7.55138998	-0.066005483	1.149312615	0.529411793	0	20.7229	977.1982	655.738	3.7791	0.7051	197	0.562107403	0.001298468	26.38846111	0.060957345
86.81390641	×ÔÉí³µÁ¾	Road 1	3.711333767	7.633280182	-0.066319995	1.207985878	0.545098066	0	20.7672	977.2012	655.738	3.777	0.7052	198	0.679802182	0.001570343	26.39986011	0.060983677
86.83053449	×ÔÉí³µÁ¾	Road 1	3.746854927	7.690372181	-0.066861488	1.24841249	0.568627477	0	20.7969	977.2031	655.738	3.7755	0.7057	199	0.587155279	0.001356329	26.40962338	0.06100623
86.84713546	×ÔÉí³µÁ¾	Road 1	3.782591158	7.749577332	-0.067390747	1.291167974	0.58431375	0	20.8269	977.2051	655.738	3.7731	0.7051	200	0.598207747	0.00138186	26.4195542	0.06102917
86.86386874	×ÔÉí³µÁ¾	Road 1	3.819065323	7.84705267	-0.068105862	1.359737039	0.592156887	0	20.8745	977.208	655.7381	3.7711	0.7062	201	0.753611802	0.001740843	26.43216461	0.0610583
86.88052652	×ÔÉí³µÁ¾	Road 1	3.855674904	7.911889172	-0.068979882	1.403062224	0.600000024	0	20.9051	977.21	655.7381	3.7697	0.7056	202	0.62657763	0.001447394	26.442602	0.061082411
86.89724991	×ÔÉí³µÁ¾	Road 1	3.892739997	7.978904057	-0.069907956	1.446051478	0.607843161	0	20.936	977.2119	655.7382	3.7673	0.7061	203	0.637211951	0.00147196	26.45325834	0.061107027
86.91385564	×ÔÉí³µÁ¾	Road 1	3.930073604	8.093652821	-0.070875674	1.515112638	0.607843161	0	20.9872	977.2148	655.7382	3.7653	0.7061	204	0.842858785	0.001947004	26.46725462	0.061139358
86.93048226	×ÔÉí³µÁ¾	Road 1	3.967789429	8.166239834	-0.072153345	1.555174828	0.607843161	0	21.0188	977.2168	655.7382	3.7639	0.7065	205	0.670244768	0.001548265	26.47839853	0.061165101
86.94837533	×ÔÉí³µÁ¾	Road 1	4.008937568	8.27880764	-0.073349983	1.611779571	0.607843161	0	21.0667	977.2207	655.7382	3.7599	0.7076	206	0.811431825	0.001874408	26.49291754	0.06119864
86.96377655	×ÔÉí³µÁ¾	Road 1	4.044686221	8.356164265	-0.074689597	1.647605419	0.600000024	0	21.099	977.2227	655.7383	3.7585	0.7079	207	0.726025799	0.00167712	26.50409922	0.061224469
86.98046439	×ÔÉí³µÁ¾	Road 1	4.083787657	8.435196304	-0.07616052	1.678728938	0.592156887	0	21.1316	977.2246	655.7383	3.7571	0.7083	208	0.70922207	0.001638303	26.5159346	0.061251809
86.99724313	×ÔÉí³µÁ¾	Road 1	4.123504591	8.521554852	-0.077534042	1.709208369	0.58431375	0	21.1669	977.2275	655.7383	3.7539	0.7087	209	0.743391865	0.001717235	26.52840778	0.061280622
87.01386682	×ÔÉí³µÁ¾	Road 1	4.163452338	8.651021862	-0.078957677	1.749534369	0.58431375	0	21.2193	977.2305	655.7383	3.7519	0.7087	210	0.945182449	0.002183371	26.5441202	0.061316918
87.03047548	×ÔÉí³µÁ¾	Road 1	4.203751401	8.734999466	-0.080654718	1.772796512	0.576470613	0	21.253	977.2334	655.7384	3.7496	0.71	211	0.747788893	0.001727392	26.55653997	0.061345607
87.04712226	×ÔÉí³µÁ¾	Road 1	4.244564591	8.826179981	-0.08215078	1.794854999	0.576470613	0	21.2896	977.2354	655.7384	3.7473	0.7103	212	0.784279593	0.001811686	26.5695957	0.061375766
87.0639164	×ÔÉí³µÁ¾	Road 1	4.286343733	8.955798912	-0.08380542	1.823695183	0.576470613	0	21.3413	977.2393	655.7385	3.7443	0.7113	213	0.962682399	0.002223796	26.58576312	0.061413113
87.08131498	×ÔÉí³µÁ¾	Road 1	4.330049758	9.043359947	-0.085677706	1.840943813	0.576470613	0	21.3763	977.2422	655.7385	3.741	0.7117	214	0.761747433	0.001759637	26.59901645	0.061443728
87.09815567	×ÔÉí³µÁ¾	Road 1	4.372976166	9.176291084	-0.087343156	1.864272833	0.568627477	0	21.4293	977.2461	655.7385	3.7381	0.7126	215	0.992797895	0.002293363	26.61573585	0.06148235
87.11383511	×ÔÉí³µÁ¾	Road 1	4.413332465	9.265808201	-0.089285858	1.877048254	0.568627477	0	21.4651	977.248	655.7385	3.7368	0.713	216	0.827022916	0.001910423	26.62870311	0.061512304
87.13052258	×ÔÉí³µÁ¾	Road 1	4.456701151	9.355958748	-0.09105318	1.888796926	0.568627477	0	21.5012	977.251	655.7386	3.7335	0.7133	217	0.807460735	0.001865234	26.64217758	0.06154343
87.14711951	×ÔÉí³µÁ¾	Road 1	4.500252741	9.446670628	-0.092937559	1.900206923	0.568627477	0	21.5377	977.2539	655.7386	3.7312	0.7146	218	0.817530401	0.001888495	26.65574608	0.061574773
87.16378132	×ÔÉí³µÁ¾	Road 1	4.544639501	9.590334892	-0.094904892	1.916329384	0.568627477	0	21.5958	977.2588	655.7386	3.7264	0.7155	219	1.083856026	0.002503707	26.67380508	0.06161649
87.18099406	×ÔÉí³µÁ¾	Road 1	4.590934059	9.682384872	-0.097286604	1.924649239	0.568627477	0	21.6332	977.2617	655.7387	3.7241	0.7157	220	0.820655564	0.001895714	26.68793082	0.06164912
87.19771782	×ÔÉí³µÁ¾	Road 1	4.636558582	9.821254635	-0.099432491	1.936815143	0.568627477	0	21.6899	977.2666	655.7388	3.7193	0.7176	221	1.076185235	0.002485988	26.70592868	0.061690695
87.23052606	×ÔÉí³µÁ¾	Road 1	4.727397534	9.967624283	-0.101549894	1.947142363	0.568627477	0	21.7503	977.2715	655.7388	3.7155	0.7185	222	0.75900642	0.001753305	26.73083034	0.061748218
87.2471032	×ÔÉí³µÁ¾	Road 1	4.774128087	10.14831505	-0.10404107	1.956921458	0.568627477	0	21.8255	977.2783	655.7389	3.709	0.72	223	1.326367196	0.003063908	26.75281771	0.061799009
87.26441711	×ÔÉí³µÁ¾	Road 1	4.823387735	10.2423254	-0.108560555	1.959815979	0.568627477	0	21.865	977.2813	655.739	3.7058	0.7203	224	0.858066022	0.001982133	26.76767419	0.061833327
87.28046311	×ÔÉí³µÁ¾	Road 1	4.869520018	10.3500103	-0.111206971	1.963098884	0.568627477	0	21.9049	977.2852	655.739	3.7026	0.7215	225	0.977640917	0.002258351	26.78336141	0.061869565
87.2971799	×ÔÉí³µÁ¾	Road 1	4.91817588	10.47815208	-0.11346636	1.966784954	0.568627477	0	21.9655	977.291	655.7391	3.6969	0.7233	226	1.071373916	0.002474874	26.80127135	0.061910937
87.31414925	×ÔÉí³µÁ¾	Road 1	4.968044458	10.57947865	-0.115669176	1.968823314	0.568627477	0	22.0092	977.2949	655.7391	3.6928	0.7235	227	0.925598484	0.002138132	26.81697816	0.06194722
87.33044121	×ÔÉí³µÁ¾	Road 1	5.016381394	10.68091421	-0.118120596	1.969617009	0.568627477	0	22.0504	977.2988	655.7392	3.6896	0.7247	228	0.955041307	0.002206145	26.83253764	0.061983162
87.34714664	×ÔÉí³µÁ¾	Road 1	5.06657306	10.81624346	-0.119892649	1.970882297	0.568627477	0	22.1129	977.3047	655.7393	3.6839	0.7255	229	1.136611729	0.002625573	26.85152523	0.062027023
87.36412185	×ÔÉí³µÁ¾	Road 1	5.118022159	10.91101084	-0.12172731	1.970885038	0.568627477	0	22.155	977.3086	655.7393	3.6798	0.7266	230	0.908984289	0.002099754	26.86695544	0.062062667
87.38042957	×ÔÉí³µÁ¾	Road 1	5.168092007	11.05313873	-0.12367148	1.970241785	0.568627477	0	22.2188	977.3154	655.7394	3.6741	0.7284	231	1.213117551	0.002802302	26.88673861	0.062108366
87.39716066	×ÔÉí³µÁ¾	Road 1	5.219902192	11.14790955	-0.125085846	1.970172763	0.568627477	0	22.2618	977.3203	655.7394	3.669	0.7296	232	0.930090037	0.002148508	26.90230003	0.062144313
87.41377958	×ÔÉí³µÁ¾	Road 1	5.271802464	11.24266491	-0.126211256	1.969032168	0.568627477	0	22.3052	977.3242	655.7395	3.6649	0.7307	233	0.939074623	0.002169262	26.91790644	0.062180364
87.43047841	×ÔÉí³µÁ¾	Road 1	5.324391719	11.33739882	-0.127111807	1.968023419	0.568627477	0	22.3489	977.3291	655.7396	3.6608	0.7319	234	0.941692401	0.002175309	26.9336316	0.062216689
87.44714609	×ÔÉí³µÁ¾	Road 1	5.377540529	11.4794486	-0.12741293	1.96618402	0.568627477	0	22.4152	977.3369	655.7396	3.6532	0.7336	235	1.229526322	0.002840206	26.95412495	0.062264029
87.46382072	×ÔÉí³µÁ¾	Road 1	5.431181389	11.58088589	-0.127459303	1.965174556	0.568627477	0	22.463	977.3418	655.7397	3.6481	0.7346	236	0.996237064	0.002301308	26.97073684	0.062302402
87.4804818	×ÔÉí³µÁ¾	Road 1	5.485216506	11.67550135	-0.127459303	1.963638306	0.568627477	0	22.508	977.3467	655.7397	3.6431	0.7357	237	0.961478499	0.002221015	26.98675611	0.062339407
87.49708753	×ÔÉí³µÁ¾	Road 1	5.539819709	11.83757458	-0.12732023	1.960512996	0.568627477	0	22.586	977.3564	655.7399	3.6337	0.7392	238	1.383691389	0.003196327	27.00973331	0.062392484
87.51374091	×ÔÉí³µÁ¾	Road 1	5.594829305	11.8915535	-0.126880497	1.959189296	0.568627477	0	22.6122	977.3594	655.74	3.6313	0.7397	239	0.724832933	0.001674364	27.02180423	0.062420368
87.53046247	×ÔÉí³µÁ¾	Road 1	5.650815819	12.05338898	-0.126165196	1.956504107	0.568627477	0	22.6916	977.3691	655.7401	3.621	0.7421	240	1.395116818	0.00322272	27.04513276	0.062474257
87.54707956	×ÔÉí³µÁ¾	Road 1	5.706888232	12.14777613	-0.125062957	1.957401276	0.568627477	0	22.7384	977.374	655.7401	3.6169	0.7432	241	0.98847006	0.002283366	27.06155825	0.0625122
87.56391841	×ÔÉí³µÁ¾	Road 1	5.764403139	12.2961834	-0.123648755	1.957227468	0.568627477	0	22.8127	977.3838	655.7403	3.6065	0.7467	242	1.326524398	0.003064271	27.08389541	0.062563798
87.58049115	×ÔÉí³µÁ¾	Road 1	5.821443929	12.39064178	-0.121480122	1.957242608	0.568627477	0	22.8604	977.3896	655.7404	3.6015	0.7478	243	1.00435905	0.002320069	27.10054038	0.062602248
87.59712437	×ÔÉí³µÁ¾	Road 1	5.879160666	12.49188509	-0.119292617	1.957677722	0.568627477	0	22.912	977.3955	655.7405	3.5956	0.7488	244	1.051595634	0.002429186	27.1180318	0.062642653
87.61394526	×ÔÉí³µÁ¾	Road 1	5.938190859	12.63361387	-0.116628148	1.956815481	0.568627477	0	22.9848	977.4053	655.7406	3.5861	0.7523	245	1.313020404	0.003033077	27.14011798	0.062693673
87.63041683	×ÔÉí³µÁ¾	Road 1	5.996427358	12.72807827	-0.11325191	1.956647396	0.56078434	0	23.0338	977.4111	655.7407	3.5802	0.7543	246	1.027480546	0.00237348	27.1570422	0.062732767
87.64710943	×ÔÉí³µÁ¾	Road 1	6.055914356	12.82922888	-0.109836452	1.954539895	0.56078434	0	23.0867	977.418	655.7407	3.5733	0.7563	247	1.068962372	0.002469303	27.17488596	0.062773987
87.66381339	×ÔÉí³µÁ¾	Road 1	6.115910669	12.93026791	-0.106161587	1.952635169	0.56078434	0	23.1401	977.4248	655.7408	3.5664	0.7582	248	1.073839926	0.00248057	27.19282334	0.062815422
87.68153308	×ÔÉí³µÁ¾	Road 1	6.180250474	13.07152033	-0.101809181	1.949316978	0.56078434	0	23.2154	977.4346	655.741	3.557	0.7617	249	1.297291965	0.002996744	27.21581095	0.062868523
87.69711135	×ÔÉí³µÁ¾	Road 1	6.237221734	13.165553	-0.097635619	1.948109388	0.56078434	0	23.2661	977.4414	655.7411	3.5501	0.7637	250	1.086716734	0.002510316	27.23274012	0.06290763
87.71378966	×ÔÉí³µÁ¾	Road 1	6.298868341	13.30637541	-0.092749834	1.944841623	0.56078434	0	23.3428	977.4512	655.7412	3.5407	0.7671	251	1.369296858	0.003163076	27.25557767	0.062960384
87.73047273	×ÔÉí³µÁ¾	Road 1	6.360966744	13.40006647	-0.088301867	1.941982865	0.552941203	0	23.3944	977.458	655.7413	3.5338	0.7701	252	1.05229174	0.002430794	27.27313313	0.063000938
87.7471404	×ÔÉí³µÁ¾	Road 1	6.423471581	13.50022831	-0.083577693	1.937767506	0.552941203	0	23.45	977.4648	655.7413	3.527	0.772	253	1.103503265	0.002549093	27.29152596	0.063043425
87.79715406	×ÔÉí³µÁ¾	Road 1	6.615358215	13.81206579	-0.078654759	1.920645833	0.552941203	0	23.6271	977.4873	655.7417	3.5058	0.7814	254	1.143263014	0.002640938	27.34870472	0.063175508
87.81428982	×ÔÉí³µÁ¾	Road 1	6.681791942	13.9568553	-0.073349983	1.912017584	0.552941203	0	23.7114	977.498	655.7418	3.4956	0.7857	255	1.42240767	0.003285762	27.37307877	0.063231812
87.83041243	×ÔÉí³µÁ¾	Road 1	6.744708841	14.0486495	-0.061320949	1.907859325	0.545098066	0	23.7655	977.5049	655.7419	3.4887	0.7896	256	1.09824703	0.002536951	27.39078537	0.063272714
87.84716111	×ÔÉí³µÁ¾	Road 1	6.81049426	14.14006691	-0.058393292	1.900325775	0.53725493	0	23.8199	977.5117	655.742	3.4829	0.7925	257	1.074802087	0.002482793	27.40878689	0.063314298
87.8638046	×ÔÉí³µÁ¾	Road 1	6.876526294	14.2827879	-0.05566705	1.886736155	0.53725493	0	23.9062	977.5225	655.7422	3.4727	0.7978	258	1.464248378	0.003382414	27.43315708	0.063370593
87.88108845	×ÔÉí³µÁ¾	Road 1	6.945470355	14.36014194	-0.053052861	1.879011512	0.53725493	0	23.9536	977.5283	655.7422	3.4667	0.8008	259	0.965604693	0.002230547	27.44984646	0.063409145
88.0305158	×ÔÉí³µÁ¾	Road 1	7.578555121	15.25226269	-0.050923269	1.776149035	0.53725493	0	24.5383	977.5957	655.7431	3.4059	0.8399	260	1.182552878	0.002731697	27.6265522	0.063817336
88.04707901	×ÔÉí³µÁ¾	Road 1	7.649531143	15.4265831	-0.048839208	1.757242918	0.53725493	0	24.6611	977.6104	655.7433	3.3935	0.8494	261	1.815150511	0.004192998	27.65661691	0.063886785
88.06378077	×ÔÉí³µÁ¾	Road 1	7.721488916	15.51021652	-0.032926694	1.755682826	0.576470613	0	24.7209	977.6172	655.7434	3.3877	0.8541	262	1.090019943	0.002517946	27.67482217	0.063928839
88.08239266	×ÔÉí³µÁ¾	Road 1	7.802324597	15.63562202	-0.031099316	1.756776214	0.576470613	0	24.8112	977.627	655.7435	3.3786	0.8613	263	1.328405574	0.003068617	27.6995463	0.063985952
88.10036967	×ÔÉí³µÁ¾	Road 1	7.880820838	15.7193224	-0.029123632	1.759299755	0.58431375	0	24.8718	977.6338	655.7437	3.3729	0.866	264	1.053071882	0.002432596	27.71847739	0.064029683
88.13058893	×ÔÉí³µÁ¾	Road 1	8.013979318	15.86308193	-0.027374573	1.763128281	0.58431375	0	24.9764	977.6455	655.7438	3.3631	0.8739	265	1.072583423	0.002477668	27.75089006	0.064104556
88.14712867	×ÔÉí³µÁ¾	Road 1	8.08760484	16.02514744	-0.025689011	1.767435551	0.592156887	0	25.0953	977.6592	655.7439	3.3506	0.8835	266	1.774768733	0.004099716	27.78024429	0.064172364
88.16377692	×ÔÉí³µÁ¾	Road 1	8.162102974	16.10940056	-0.02318456	1.772491217	0.615686297	0	25.1574	977.666	655.744	3.3449	0.8882	267	1.12799978	0.002605679	27.79902351	0.064215744
88.18052451	×ÔÉí³µÁ¾	Road 1	8.237439359	16.19403648	-0.021720259	1.782239676	0.639215708	0	25.2199	977.6729	655.7441	3.3392	0.8929	268	1.131351809	0.002613423	27.81797091	0.064259513
88.19766101	×ÔÉí³µÁ¾	Road 1	8.315134892	16.32211475	-0.020441907	1.802006245	0.647058845	0	25.3142	977.6826	655.7443	3.3311	0.9	269	1.477061457	0.003412012	27.84328258	0.064317983
88.21488841	×ÔÉí³µÁ¾	Road 1	8.393685003	16.41456642	-0.019234434	1.817866921	0.662745118	0	25.382	977.6904	655.7444	3.3235	0.9056	270	1.186792527	0.002741491	27.86372794	0.064365212
88.23041463	×ÔÉí³µÁ¾	Road 1	8.464880934	16.50790558	-0.018043963	1.835544109	0.678431392	0	25.4502	977.6982	655.7444	3.317	0.9112	271	1.283606521	0.002965131	27.88365749	0.064411249
88.24913942	×ÔÉí³µÁ¾	Road 1	8.551465935	16.6467041	-0.017121673	1.865168214	0.686274529	0	25.5509	977.709	655.7446	3.308	0.9191	272	1.491401907	0.003445138	27.91158368	0.064475758
88.26378627	×ÔÉí³µÁ¾	Road 1	8.619610885	16.74911728	-0.016325446	1.88699472	0.701960802	0	25.6247	977.7168	655.7447	3.3016	0.9246	273	1.439260636	0.003324692	27.93266431	0.064524455
88.28045174	×ÔÉí³µÁ¾	Road 1	8.69756725	16.83977852	-0.015537187	1.906754494	0.701960802	0	25.6896	977.7236	655.7448	3.2959	0.9293	274	1.220531622	0.002819428	27.95300505	0.064571442
88.29830303	×ÔÉí³µÁ¾	Road 1	8.781753977	16.97761402	-0.015141547	1.935748458	0.709803939	0	25.7877	977.7344	655.7449	3.286	0.9373	275	1.560322593	0.003604345	27.98085881	0.064635784
88.31376437	×ÔÉí³µÁ¾	Road 1	8.855098268	17.07739906	-0.01480782	1.946786761	0.709803939	0	25.8583	977.7422	655.745	3.2794	0.9438	276	1.382515461	0.003193611	28.00223435	0.064685161
88.33039649	×ÔÉí³µÁ¾	Road 1	8.934430849	17.17143173	-0.014593549	1.972257137	0.709803939	0	25.9245	977.749	655.7451	3.2738	0.9485	277	1.270236686	0.002934247	28.02336108	0.064733964
88.34710961	×ÔÉí³µÁ¾	Road 1	9.014590165	17.26627979	-0.014489913	1.987859488	0.709803939	0	25.9911	977.7568	655.7452	3.2672	0.9551	278	1.278770692	0.00295396	28.04473334	0.064783334
88.3637289	×ÔÉí³µÁ¾	Road 1	9.09499426	17.4167942	-0.014435566	2.009840727	0.709803939	0	26.0965	977.7676	655.7454	3.2584	0.9629	279	1.792733945	0.004141215	28.0745273	0.064852158
88.38042077	×ÔÉí³µÁ¾	Road 1	9.176197485	17.51341553	-0.014397604	2.021350145	0.701960802	0	26.164	977.7754	655.7455	3.2518	0.9695	280	1.309895206	0.003025858	28.0963919	0.064902665
88.3971152	×ÔÉí³µÁ¾	Road 1	9.25786367	17.61055698	-0.014348893	2.030916929	0.701960802	0	26.2319	977.7822	655.7455	3.2462	0.9741	281	1.320090722	0.00304941	28.11843007	0.064953573
88.41377885	×ÔÉí³µÁ¾	Road 1	9.340089695	17.76404457	-0.014311084	2.042142868	0.694117665	0	26.3394	977.7939	655.7457	3.2364	0.9839	282	1.846084534	0.004264455	28.14919256	0.065024635
88.4309487	×ÔÉí³µÁ¾	Road 1	9.425281217	17.86208725	-0.014214163	2.04590416	0.678431392	0	26.4083	977.8018	655.7458	3.2289	0.9895	283	1.31795026	0.003044465	28.17182158	0.065076908
88.44737555	×ÔÉí³µÁ¾	Road 1	9.507265954	17.96723671	-0.014085618	2.046258688	0.678431392	0	26.4776	977.8086	655.7458	3.2233	0.9951	284	1.430747024	0.003305026	28.19532424	0.065131199
88.46372065	×ÔÉí³µÁ¾	Road 1	9.589479023	18.10738106	-0.01376765	2.047768593	0.662745118	0	26.5822	977.8203	655.7461	3.2135	1.0039	285	1.777346468	0.00410567	28.22437515	0.065198307
88.48040336	×ÔÉí³µÁ¾	Road 1	9.673845701	18.20568466	-0.013192093	2.049920082	0.647058845	0	26.6524	977.8281	655.7461	3.2069	1.0105	286	1.366189256	0.003155897	28.24716688	0.065250956
88.49750723	×ÔÉí³µÁ¾	Road 1	9.760841693	18.31079464	-0.012533744	2.039850712	0.631372571	0	26.7281	977.8359	655.7462	3.2005	1.0159	287	1.412081389	0.003261908	28.27131895	0.065306747
88.5137596	×ÔÉí³µÁ¾	Road 1	9.844164009	18.45640984	-0.011783523	2.011131525	0.615686297	0	26.8347	977.8477	655.7464	3.1907	1.0257	288	1.866972026	0.004312705	28.30166166	0.065376838
88.53039319	×ÔÉí³µÁ¾	Road 1	9.92988385	18.55231018	-0.010887508	1.994110584	0.607843161	0	26.9063	977.8555	655.7465	3.1842	1.0322	289	1.366275529	0.003156096	28.32438772	0.065429336
88.54712171	×ÔÉí³µÁ¾	Road 1	10.01675508	18.69480114	-0.010042369	1.974402547	0.600000024	0	27.0143	977.8672	655.7466	3.1744	1.041	290	1.816302612	0.004195659	28.35477178	0.065499523
88.56373953	×ÔÉí³µÁ¾	Road 1	10.10348523	18.78877544	-0.009209919	1.964956641	0.592156887	0	27.0868	977.875	655.7468	3.1679	1.0475	291	1.362058073	0.003146354	28.37740622	0.065551808
88.58173084	×ÔÉí³µÁ¾	Road 1	10.19787974	18.88802147	-0.008315339	1.922223568	0.592156887	0	27.1648	977.8828	655.7468	3.1615	1.0529	292	1.344970984	0.003106883	28.40160401	0.065607705
88.59818481	×ÔÉí³µÁ¾	Road 1	10.28483067	19.02418156	-0.007557955	1.882608294	0.592156887	0	27.2748	977.8955	655.747	3.1499	1.0627	293	1.803595643	0.004166306	28.43128032	0.065676258
88.614038	×ÔÉí³µÁ¾	Road 1	10.36900018	19.11352272	-0.006778917	1.863849282	0.592156887	0	27.3485	977.9033	655.7471	3.1434	1.0691	294	1.37735464	0.003181689	28.45311579	0.065726697
88.63048098	×ÔÉí³µÁ¾	Road 1	10.45670509	19.20197811	-0.006143976	1.846608281	0.592156887	0	27.4226	977.9111	655.7472	3.1369	1.0756	295	1.33998713	0.00309537	28.47514916	0.065777595
88.64709477	×ÔÉí³µÁ¾	Road 1	10.5459256	19.33296432	-0.005529909	1.819067478	0.592156887	0	27.5344	977.9229	655.7474	3.1272	1.0843	296	1.763155467	0.004072889	28.50444186	0.065845261
88.66373165	×ÔÉí³µÁ¾	Road 1	10.63566853	19.4191761	-0.004987525	1.802862406	0.592156887	0	27.6093	977.9316	655.7475	3.1198	1.0918	297	1.31874549	0.003046302	28.52638167	0.065895942
88.68042645	×ÔÉí³µÁ¾	Road 1	10.72614859	19.51075745	-0.004514251	1.789563417	0.592156887	0	27.6846	977.9395	655.7476	3.1134	1.0972	298	1.374518253	0.003175137	28.54932898	0.06594895
88.69710696	×ÔÉí³µÁ¾	Road 1	10.81697211	19.60160751	-0.00404628	1.776153684	0.592156887	0	27.771	977.9492	655.7477	3.1052	1.1054	299	1.372934457	0.003171479	28.57223022	0.066001852
88.71378013	×ÔÉí³µÁ¾	Road 1	10.90839423	19.7394722	-0.003685597	1.754317403	0.592156887	0	27.8959	977.9619	655.7479	3.0947	1.1159	300	1.859136761	0.004294606	28.60322793	0.066073457
88.73038256	×ÔÉí³µÁ¾	Road 1	10.99981152	19.82253742	-0.003377833	1.74275291	0.592156887	0	27.9724	977.9707	655.748	3.0873	1.1223	301	1.309456659	0.003024845	28.62496809	0.066123676
88.74713307	×ÔÉí³µÁ¾	Road 1	11.09242843	19.90510998	-0.003087698	1.734540105	0.592156887	0	28.0492	977.9785	655.7481	3.0809	1.1287	302	1.301037743	0.003005397	28.64676114	0.066174018
88.76379268	×ÔÉí³µÁ¾	Road 1	11.18511233	20.02820148	-0.002873481	1.722098827	0.592156887	0	28.1651	977.9912	655.7483	3.0703	1.1393	303	1.730690976	0.003997896	28.67559378	0.066240622
88.78040794	×ÔÉí³µÁ¾	Road 1	11.27792554	20.10968227	-0.002671171	1.711346626	0.592156887	0	28.2427	978	655.7484	3.0629	1.1457	304	1.306930843	0.00301901	28.69730877	0.066290783
88.79708038	×ÔÉí³µÁ¾	Road 1	11.37143316	20.19065151	-0.002532632	1.70208168	0.592156887	0	28.3206	978.0078	655.7485	3.0565	1.1521	305	1.30273106	0.003009309	28.71902848	0.066340956
88.81382613	×ÔÉí³µÁ¾	Road 1	11.46594021	20.31711788	-0.002430276	1.69253993	0.592156887	0	28.4437	978.0215	655.7487	3.0441	1.1636	306	1.77990124	0.004111572	28.74883426	0.066409807
88.83046302	×ÔÉí³µÁ¾	Road 1	11.5602031	20.39723396	-0.002369557	1.686528563	0.592156887	0	28.5224	978.0293	655.7488	3.0378	1.17	307	1.30583016	0.003016468	28.7705592	0.066459992
88.84711713	×ÔÉí³µÁ¾	Road 1	11.65493276	20.47703075	-0.002346848	1.679436803	0.592156887	0	28.6015	978.0381	655.7489	3.0304	1.1773	308	1.305512365	0.003015734	28.79230135	0.066510216
88.86378077	×ÔÉí³µÁ¾	Road 1	11.75029339	20.60163288	-0.002343616	1.667987823	0.592156887	0	28.7263	978.0518	655.749	3.019	1.1877	309	1.787491379	0.004129105	28.82208747	0.066579022
88.88044221	×ÔÉí³µÁ¾	Road 1	11.84600653	20.68051987	-0.002343616	1.663349628	0.592156887	0	28.8061	978.0596	655.7491	3.0126	1.1941	310	1.305423263	0.003015528	28.84383771	0.066629265
88.89704757	×ÔÉí³µÁ¾	Road 1	11.94176051	20.75922146	-0.002343616	1.659660339	0.592156887	0	28.8862	978.0684	655.7493	3.0053	1.2015	311	1.310123628	0.003026386	28.86559278	0.066679519
88.91379516	×ÔÉí³µÁ¾	Road 1	12.03872578	20.84330292	-0.002346848	1.65410018	0.592156887	0	28.9724	978.0781	655.7494	2.9971	1.2097	312	1.364622007	0.003152277	28.8884469	0.066732312
88.93116589	×ÔÉí³µÁ¾	Road 1	12.13994448	20.97708721	-0.002348465	1.643371224	0.592156887	0	29.1111	978.0928	655.7496	2.985	1.2218	313	1.854895356	0.004284808	28.92066779	0.066806743
88.94814257	×ÔÉí³µÁ¾	Road 1	12.23923343	21.054776	-0.002348465	1.63962841	0.592156887	0	29.1923	978.1016	655.7497	2.9777	1.2291	314	1.294886041	0.002991187	28.94265066	0.066857523
88.96485056	×ÔÉí³µÁ¾	Road 1	12.3374906	21.17104912	-0.002287532	1.635380149	0.592156887	0	29.3148	978.1143	655.7499	2.9672	1.2396	315	1.734407589	0.004006482	28.97162913	0.066924463
88.98209593	×ÔÉí³µÁ¾	Road 1	12.43927819	21.2483345	-0.002190392	1.630716324	0.592156887	0	29.3969	978.123	655.75	2.9599	1.2469	316	1.286698132	0.002972273	28.99381871	0.066975721
88.99800887	×ÔÉí³µÁ¾	Road 1	12.53354171	21.32533493	-0.002063226	1.625000477	0.592156887	0	29.4792	978.1318	655.7501	2.9526	1.2542	317	1.356021388	0.003132409	29.01539699	0.067025567
89.0137026	×ÔÉí³µÁ¾	Road 1	12.62700847	21.4404253	-0.001893044	1.621199727	0.592156887	0	29.5677	978.1416	655.7502	2.9422	1.2646	318	1.821922982	0.004208642	29.04398977	0.067091616
89.03157698	×ÔÉí³µÁ¾	Road 1	12.73384273	21.51701889	-0.001737774	1.618726373	0.592156887	0	29.6863	978.1543	655.7504	2.9339	1.2729	319	1.262749776	0.002916952	29.06656064	0.067143755
89.04797707	×ÔÉí³µÁ¾	Road 1	12.83238736	21.63163033	-0.00158625	1.612906694	0.592156887	0	29.8114	978.167	655.7505	2.9235	1.2833	320	1.771208712	0.004091492	29.09560862	0.067210856
89.06379177	×ÔÉí³µÁ¾	Road 1	12.92774894	21.70776043	-0.001425168	1.60817647	0.592156887	0	29.8953	978.1758	655.7506	2.9162	1.2906	321	1.370329008	0.00316546	29.11727996	0.067260917
89.08043891	×ÔÉí³µÁ¾	Road 1	13.02848127	21.78369484	-0.001303578	1.605524302	0.592156887	0	29.9794	978.1855	655.7507	2.908	1.2988	322	1.326635838	0.003064529	29.13936466	0.067311932
89.09761537	×ÔÉí³µÁ¾	Road 1	13.13285577	21.88118477	-0.001188081	1.603670359	0.592156887	0	30.0698	978.1943	655.7509	2.9008	1.3059	323	1.541026654	0.003559772	29.16583403	0.067373077
89.11378306	×ÔÉí³µÁ¾	Road 1	13.23156165	21.97847214	-0.001076728	1.598905563	0.592156887	0	30.197	978.208	655.7511	2.8895	1.3163	324	1.611342292	0.003722201	29.19188572	0.067433256
89.14716496	×ÔÉí³µÁ¾	Road 1	13.43685222	22.13912315	-0.000955584	1.577083588	0.592156887	0	30.3798	978.2275	655.7513	2.8733	1.3325	325	1.38961118	0.003210002	29.23827358	0.067540412
89.16376006	×ÔÉí³µÁ¾	Road 1	13.53925006	22.21332207	-0.000852087	1.568823934	0.592156887	0	30.4655	978.2373	655.7515	2.8651	1.3407	326	1.329647026	0.003071485	29.26033921	0.067591384
89.1803328	×ÔÉí³µÁ¾	Road 1	13.64206708	22.3343502	-0.000639784	1.556131124	0.592156887	0	30.6071	978.252	655.7516	2.853	1.3528	327	1.879435941	0.004341497	29.2914866	0.067663334
89.19730984	×ÔÉí³µÁ¾	Road 1	13.74773752	22.40752087	-0.000546192	1.548741817	0.600000024	0	30.6936	978.2617	655.7518	2.8448	1.361	328	1.307524291	0.003020381	29.3136845	0.067714611
89.21377335	×ÔÉí³µÁ¾	Road 1	13.85071124	22.5168005	-0.000460563	1.54487586	0.600000024	0	30.8239	978.2754	655.752	2.8335	1.3723	329	1.763622093	0.004073967	29.3427199	0.067781683
89.23041316	×ÔÉí³µÁ¾	Road 1	13.95512411	22.58957119	-0.000374788	1.544321537	0.600000024	0	30.9111	978.2842	655.7521	2.8263	1.3795	330	1.3280681	0.003067837	29.36481871	0.067832731
89.24767063	×ÔÉí³µÁ¾	Road 1	14.06378637	22.66753292	-0.000305339	1.543689609	0.600000024	0	31.0049	978.2949	655.7522	2.8173	1.3886	331	1.359737411	0.003140993	29.38828433	0.067886937
89.26441161	×ÔÉí³µÁ¾	Road 1	14.1695589	22.74544144	-0.000243616	1.542047381	0.600000024	0	31.099	978.3047	655.7523	2.8092	1.3966	332	1.390111029	0.003211156	29.41155616	0.067940695
89.28034361	×ÔÉí³µÁ¾	Road 1	14.27072486	22.85950012	-0.000186311	1.539170623	0.600000024	0	31.2375	978.3193	655.7525	2.7971	1.4087	333	1.888555952	0.004362564	29.44164463	0.068010199
89.29708899	×ÔÉí³µÁ¾	Road 1	14.37739307	22.93202362	-0.000142996	1.539231896	0.600000024	0	31.3261	978.3291	655.7526	2.7889	1.4169	334	1.335302798	0.003084549	29.46400479	0.068061851
89.31382265	×ÔÉí³µÁ¾	Road 1	14.48432361	23.0045351	-0.000106357	1.538817644	0.600000024	0	31.4149	978.3379	655.7527	2.7817	1.4241	335	1.33904102	0.003093185	29.48641184	0.068113611
89.33040822	×ÔÉí³µÁ¾	Road 1	14.59083235	23.11838093	-7.66E-05	1.536553264	0.600000024	0	31.5551	978.3535	655.7529	2.7687	1.4371	336	1.847811187	0.004268444	29.51705883	0.068184406
89.34704876	×ÔÉí³µÁ¾	Road 1	14.69802858	23.19072762	-5.12E-05	1.535131693	0.600000024	0	31.6446	978.3623	655.7531	2.7615	1.4443	337	1.350334624	0.003119273	29.53952914	0.068236312
89.36372011	×ÔÉí³µÁ¾	Road 1	14.80575792	23.2630125	-3.52E-05	1.534284353	0.600000024	0	31.7344	978.3721	655.7532	2.7534	1.4524	338	1.351258053	0.003121406	29.56205642	0.06828835
89.3804303	×ÔÉí³µÁ¾	Road 1	14.91426532	23.37654591	-2.44E-05	1.533874035	0.600000024	0	31.8762	978.3877	655.7534	2.7403	1.4655	339	1.851057591	0.004275943	29.59298796	0.068359802
89.39703676	×ÔÉí³µÁ¾	Road 1	15.02243225	23.44876385	-1.70E-05	1.533055544	0.600000024	0	31.9667	978.3965	655.7535	2.7332	1.4726	340	1.362276056	0.003146858	29.61561054	0.06841206
89.41376015	×ÔÉí³µÁ¾	Road 1	15.13171986	23.52605438	-1.30E-05	1.531239152	0.600000024	0	32.064	978.4072	655.7537	2.7242	1.4816	341	1.421082499	0.003282701	29.63937586	0.068466958
89.43116827	×ÔÉí³µÁ¾	Road 1	15.24600483	23.63413925	-1.05E-05	1.529389024	0.600000024	0	32.2008	978.4219	655.7538	2.712	1.4938	342	1.749057496	0.004040323	29.66982366	0.068537293
89.4474133	×ÔÉí³µÁ¾	Road 1	15.3529791	23.70615807	-9.00E-06	1.52935636	0.600000024	0	32.2924	978.4316	655.754	2.7039	1.5019	343	1.391239272	0.003213763	29.69242439	0.0685895
89.463684	×ÔÉí³µÁ¾	Road 1	15.46044771	23.7781477	-8.68E-06	1.528487682	0.600000024	0	32.3842	978.4414	655.7541	2.6958	1.51	344	1.39275537	0.003217265	29.71508549	0.068641847
89.48041802	×ÔÉí³µÁ¾	Road 1	15.57135869	23.86034603	-8.68E-06	1.526875854	0.600000024	0	32.4895	978.4521	655.7543	2.687	1.5188	345	1.496702892	0.003457384	29.74013134	0.068699703
89.4970725	×ÔÉí³µÁ¾	Road 1	15.68224089	23.96808243	-8.68E-06	1.525427699	0.600000024	0	32.6282	978.4678	655.7544	2.6739	1.5319	346	1.823323397	0.004211877	29.77049784	0.06876985
89.51370242	×ÔÉí³µÁ¾	Road 1	15.79329123	24.03987637	-8.72E-06	1.524597526	0.600000024	0	32.7211	978.4775	655.7545	2.6658	1.54	347	1.382535183	0.003193656	29.79348929	0.06882296
89.53046576	×ÔÉí³µÁ¾	Road 1	15.90573373	24.14750805	-8.72E-06	1.524191976	0.600000024	0	32.8608	978.4922	655.7548	2.6537	1.5521	348	1.824704357	0.004215067	29.82407744	0.068893619
89.54702604	×ÔÉí³µÁ¾	Road 1	16.01714391	24.21920242	-9.32E-06	1.522950411	0.600000024	0	32.9544	978.502	655.7549	2.6457	1.5601	349	1.393160222	0.0032182	29.84714856	0.068946913
89.56370104	×ÔÉí³µÁ¾	Road 1	16.12965763	24.29081097	-9.65E-06	1.521510124	0.600000024	0	33.0482	978.5117	655.755	2.6376	1.5682	350	1.389075171	0.003208764	29.87031139	0.069000419
89.58034746	×ÔÉí³µÁ¾	Road 1	16.24235668	24.37261105	-1.01E-05	1.521065593	0.600000024	0	33.1557	978.5234	655.7551	2.6278	1.578	351	1.522846345	0.003517775	29.89566133	0.069058978
89.59705839	×ÔÉí³µÁ¾	Road 1	16.35599055	24.47990284	-1.02E-05	1.519824028	0.600000024	0	33.2974	978.5381	655.7554	2.6158	1.59	352	1.845700599	0.004263568	29.9265047	0.069130226
89.61380011	×ÔÉí³µÁ¾	Road 1	16.47016623	24.5513895	-1.03E-05	1.5191468	0.607843161	0	33.3922	978.5488	655.7555	2.6068	1.599	353	1.395606832	0.003223852	29.94986955	0.069184199
89.63052496	×ÔÉí³µÁ¾	Road 1	16.58458275	24.62798138	-1.03E-05	1.520263314	0.607843161	0	33.4941	978.5596	655.7556	2.5979	1.6079	354	1.464715471	0.003383493	29.97436671	0.069240787
89.64701816	×ÔÉí³µÁ¾	Road 1	16.69792995	24.74050198	-1.03E-05	1.523300171	0.607843161	0	33.6441	978.5752	655.7559	2.585	1.6208	355	1.947751433	0.004499306	30.00649135	0.069314995
89.6636895	×ÔÉí³µÁ¾	Road 1	16.8128337	24.812253	-1.03E-05	1.525545239	0.615686297	0	33.74	978.5859	655.756	2.576	1.6298	356	1.41451192	0.003267523	30.03007316	0.069369469
89.68135457	×ÔÉí³µÁ¾	Road 1	16.93493935	24.88414993	-1.03E-05	1.529506445	0.623529434	0	33.8361	978.5957	655.7561	2.5679	1.6379	357	1.367526204	0.003158986	30.05423061	0.069425273
89.69701092	×ÔÉí³µÁ¾	Road 1	17.04365369	24.99763527	-1.03E-05	1.538577318	0.623529434	0	33.9876	978.6123	655.7563	2.5541	1.6517	358	2.056761707	0.00475112	30.08643199	0.069499658
89.71369472	×ÔÉí³µÁ¾	Road 1	17.15983913	25.07027721	-1.03E-05	1.545314789	0.631372571	0	34.0844	978.6221	655.7565	2.5461	1.6597	359	1.436956369	0.003319369	30.11040589	0.069555038
89.73033674	×ÔÉí³µÁ¾	Road 1	17.27607103	25.14327965	-1.02E-05	1.553218484	0.639215708	0	34.1815	978.6328	655.7566	2.5371	1.6687	360	1.447336313	0.003343347	30.13449248	0.069610678
89.78045449	×ÔÉí³µÁ¾	Road 1	17.62956266	25.39159641	-1.01E-05	1.580530763	0.639215708	0	34.4816	978.6641	655.757	2.5113	1.6945	361	1.579394011	0.0036484	30.21364816	0.069793527
89.79699424	×ÔÉí³µÁ¾	Road 1	17.74683619	25.52546482	-1.01E-05	1.593151093	0.639215708	0	34.6854	978.6865	655.7573	2.4926	1.7132	362	2.279251255	0.00526507	30.2513464	0.06988061
89.81423741	×ÔÉí³µÁ¾	Road 1	17.8694581	25.60079842	-9.48E-06	1.597604394	0.647058845	0	34.7843	978.6963	655.7574	2.4846	1.7212	363	1.46427599	0.003382478	30.27659516	0.069938935
89.83032629	×ÔÉí³µÁ¾	Road 1	17.98420918	25.6763586	-9.12E-06	1.602792621	0.647058845	0	34.8835	978.707	655.7576	2.4757	1.7301	364	1.540281753	0.003558051	30.30137657	0.06999618
89.84714719	×ÔÉí³µÁ¾	Road 1	18.10471331	25.79023533	-8.42E-06	1.611056924	0.647058845	0	35.0327	978.7227	655.7577	2.4627	1.7431	365	2.006137708	0.004634178	30.3351216	0.070074131
89.86433134	×ÔÉí³µÁ¾	Road 1	18.22820992	25.87196674	-7.72E-06	1.617301822	0.647058845	0	35.1398	978.7344	655.7579	2.453	1.7528	366	1.56296314	0.003610445	30.3619798	0.070136173
89.88035021	×ÔÉí³µÁ¾	Road 1	18.34367242	25.94845905	-6.82E-06	1.620099545	0.647058845	0	35.24	978.7451	655.7581	2.4441	1.7617	367	1.571048285	0.003629122	30.38714622	0.070194308
89.89702448	×ÔÉí³µÁ¾	Road 1	18.46439169	26.06346703	-5.94E-06	1.624502063	0.647058845	0	35.3909	978.7607	655.7582	2.4312	1.7746	368	2.052841888	0.004742065	30.42137586	0.070273378
89.9139975	×ÔÉí³µÁ¾	Road 1	18.5876361	26.14030952	-5.19E-06	1.626674294	0.647058845	0	35.4918	978.7715	655.7584	2.4223	1.7835	369	1.524552554	0.003521716	30.44725212	0.070333152
89.93034847	×ÔÉí³µÁ¾	Road 1	18.7068879	26.25571747	-4.34E-06	1.628149748	0.647058845	0	35.6438	978.7881	655.7585	2.4084	1.7974	370	2.102199303	0.00485608	30.48162512	0.070412554
89.94704217	×ÔÉí³µÁ¾	Road 1	18.82899637	26.3327179	-3.21E-06	1.629436374	0.647058845	0	35.7455	978.7988	655.7587	2.3995	1.8063	371	1.552936768	0.003587284	30.50754938	0.070472439
89.96397523	×ÔÉí³µÁ¾	Road 1	18.95321817	26.40978355	-2.11E-06	1.630916715	0.647058845	0	35.8475	978.8096	655.7589	2.3906	1.8152	372	1.542625317	0.003563464	30.53367075	0.070532779
89.98042957	×ÔÉí³µÁ¾	Road 1	19.07445645	26.52539234	-1.28E-06	1.630122662	0.647058845	0	36.001	978.8262	655.759	2.3768	1.829	373	2.113389699	0.00488193	30.56844518	0.070613108
89.99758806	×ÔÉí³µÁ¾	Road 1	19.20125045	26.60247688	-5.38E-07	1.630625129	0.639215708	0	36.1037	978.8369	655.7592	2.3679	1.8378	374	1.53822845	0.003553308	30.59483886	0.070674078
90.01398228	×ÔÉí³µÁ¾	Road 1	19.32287273	26.70697918	-1.54E-07	1.62825191	0.639215708	0	36.2068	978.8477	655.7593	2.359	1.8467	375	1.976046146	0.004564667	30.6272346	0.070748912
90.03036001	×ÔÉí³µÁ¾	Road 1	19.44477207	26.79477882	-6.61E-09	1.62361598	0.639215708	0	36.3619	978.8643	655.7595	2.3452	1.8605	376	1.747742961	0.004037286	30.65585866	0.070815034
90.04698773	×ÔÉí³µÁ¾	Road 1	19.5688862	26.87144451	2.03E-09	1.620558143	0.639215708	0	36.4657	978.875	655.7597	2.3364	1.8693	377	1.578183972	0.003645605	30.68210026	0.070875652
90.06396441	×ÔÉí³µÁ¾	Road 1	19.69614577	26.98610229	8.05E-08	1.616483688	0.639215708	0	36.6219	978.8916	655.7599	2.3226	1.8831	378	2.081630558	0.004808567	30.71743944	0.070957285
90.08029706	×ÔÉí³µÁ¾	Road 1	19.81892368	27.06239891	4.00E-07	1.614383817	0.639215708	0	36.7264	978.9033	655.7601	2.3128	1.8929	379	1.601462091	0.003699377	30.74359555	0.071017706
90.09846725	×ÔÉí³µÁ¾	Road 1	19.95609169	27.17664814	1.32E-06	1.610952139	0.639215708	0	36.8837	978.9199	655.7603	2.299	1.9067	380	1.985005532	0.004585363	30.77966347	0.071101023
90.11737348	×ÔÉí³µÁ¾	Road 1	20.09935811	27.27984581	2.98E-06	1.608387947	0.631372571	0	37.0266	978.9355	655.7605	2.286	1.9197	381	1.796568561	0.004150073	30.81362982	0.071179485
90.1324437	×ÔÉí³µÁ¾	Road 1	20.21387371	27.35567894	6.15E-06	1.604166627	0.631372571	0	37.1323	978.9463	655.7606	2.2771	1.9285	382	1.700714435	0.00392865	30.83925996	0.071238691
90.14985988	×ÔÉí³µÁ¾	Road 1	20.34660774	27.43669453	1.15E-05	1.599769831	0.631372571	0	37.2458	978.958	655.7607	2.2675	1.9382	383	1.61472978	0.003730026	30.86738239	0.071303653
90.16602684	×ÔÉí³µÁ¾	Road 1	20.4703045	27.54434853	1.69E-05	1.594200015	0.631372571	0	37.3977	978.9746	655.761	2.2536	1.952	384	2.096202322	0.004842227	30.90127161	0.071381937
90.19706828	×ÔÉí³µÁ¾	Road 1	20.70845676	27.61946926	2.71E-05	1.590537548	0.631372571	0	37.5044	978.9863	655.7611	2.2438	1.9618	385	1.091657999	0.00252173	30.93515825	0.071460216
90.21373926	×ÔÉí³µÁ¾	Road 1	20.83712533	27.78523064	4.11E-05	1.584345102	0.631372571	0	37.7416	979.0107	655.7615	2.2237	1.9819	386	2.896518673	0.006690958	30.98344603	0.07157176
90.23032592	×ÔÉí³µÁ¾	Road 1	20.96548719	27.85989132	8.48E-05	1.582545042	0.631372571	0	37.8492	979.0225	655.7616	2.2139	1.9916	387	1.598976402	0.003693635	31.00996772	0.071633025
90.24793308	×ÔÉí³µÁ¾	Road 1	21.10229342	27.97171669	0.000123206	1.579133153	0.631372571	0	38.0111	979.04	655.7618	2.1993	2.0063	388	2.049753515	0.004734931	31.04605806	0.071716394
90.26368473	×ÔÉí³µÁ¾	Road 1	21.22500816	28.0461422	0.000163152	1.577395558	0.623529434	0	38.1195	979.0518	655.762	2.1895	2.016	389	1.661818574	0.003838801	31.07223444	0.071776862
90.28041216	×ÔÉí³µÁ¾	Road 1	21.35566981	28.12040806	0.000212215	1.573496938	0.623529434	0	38.2281	979.0625	655.7622	2.1808	2.0248	390	1.596223395	0.003687276	31.09893515	0.07183854
90.29707507	×ÔÉí³µÁ¾	Road 1	21.48634134	28.23141289	0.000259297	1.567376971	0.623529434	0	38.3915	979.0801	655.7624	2.1661	2.0394	391	2.14169407	0.004947313	31.134622	0.071920977
90.31366686	×ÔÉí³µÁ¾	Road 1	21.61679511	28.3051672	0.000311608	1.563513875	0.623529434	0	38.5009	979.0918	655.7626	2.1564	2.0491	392	1.606093043	0.003710075	31.16126997	0.071982534
90.33039575	×ÔÉí³µÁ¾	Road 1	21.74866865	28.3787344	0.000369106	1.559842467	0.623529434	0	38.6105	979.1035	655.7627	2.1467	2.0589	393	1.597833028	0.003690994	31.18799994	0.07204428
90.34704876	×ÔÉí³µÁ¾	Road 1	21.88047714	28.49397926	0.000439066	1.554798126	0.623529434	0	38.7833	979.1221	655.7629	2.1312	2.0743	394	2.222273016	0.005133451	31.22500748	0.072129767
90.36369628	×ÔÉí³µÁ¾	Road 1	22.01258042	28.56713619	0.000506803	1.552581549	0.623529434	0	38.8936	979.1338	655.7631	2.1215	2.084	395	1.605689939	0.003709144	31.25173823	0.072191515
90.38120117	×ÔÉí³µÁ¾	Road 1	22.15202	28.6767025	0.000577354	1.550297022	0.623529434	0	39.0597	979.1514	655.7633	2.1069	2.0985	396	2.071249489	0.004784586	31.28799522	0.072275269
90.3970265	×ÔÉí³µÁ¾	Road 1	22.27840122	28.74963112	0.000655547	1.547631741	0.623529434	0	39.1707	979.1631	655.7634	2.0972	2.1082	397	1.667116667	0.00385104	31.31437789	0.072336213
90.41508049	×ÔÉí³µÁ¾	Road 1	22.42297182	28.82765465	0.0007308	1.546258092	0.623529434	0	39.282	979.1748	655.7636	2.0875	2.1179	398	1.599408528	0.003694634	31.3432536	0.072402916
90.43075516	×ÔÉí³µÁ¾	Road 1	22.54894188	28.93152351	0.000787157	1.544253469	0.623529434	0	39.4496	979.1924	655.7638	2.073	2.1325	399	2.178853096	0.005033151	31.37740641	0.072481809
90.4484085	×ÔÉí³µÁ¾	Road 1	22.69116984	29.00417404	0.000852087	1.543020129	0.623529434	0	39.5616	979.2051	655.764	2.0623	2.1431	400	1.555834293	0.003593977	31.40487209	0.072545255
90.46374595	×ÔÉí³µÁ¾	Road 1	22.81507057	29.08194351	0.000894747	1.542407513	0.623529434	0	39.6819	979.2178	655.7642	2.0518	2.1536	401	1.798850478	0.004155345	31.43246185	0.072608987
90.48032675	×ÔÉí³µÁ¾	Road 1	22.9495402	29.19585457	0.000917032	1.539352536	0.623529434	0	39.859	979.2363	655.7644	2.0364	2.169	402	2.257080592	0.005213856	31.46988606	0.072695437
90.49697756	×ÔÉí³µÁ¾	Road 1	23.08491255	29.2682682	0.00092136	1.538319349	0.623529434	0	39.9721	979.248	655.7645	2.0267	2.1786	403	1.626287044	0.003756723	31.49696506	0.072757989
90.51367089	×ÔÉí³µÁ¾	Road 1	23.22096621	29.34064407	0.00092136	1.537684441	0.623529434	0	40.0854	979.2607	655.7648	2.0161	2.1893	404	1.626192544	0.003756505	31.52411163	0.072820698
90.5303393	×ÔÉí³µÁ¾	Road 1	23.35731894	29.44911346	0.00092136	1.536823034	0.623529434	0	40.256	979.2783	655.765	2.0016	2.2037	405	2.182143532	0.005040752	31.56048449	0.072904719
90.54706526	×ÔÉí³µÁ¾	Road 1	23.49447813	29.52136574	0.00092136	1.535172343	0.623529434	0	40.37	979.29	655.7651	1.9919	2.2134	406	1.630334077	0.003766072	31.58775339	0.07296771
90.56371717	×ÔÉí³µÁ¾	Road 1	23.63153101	29.62964973	0.00092136	1.534712791	0.623529434	0	40.5416	979.3086	655.7653	1.9765	2.2288	407	2.192507786	0.005064693	31.62426284	0.073052047
90.58036652	×ÔÉí³µÁ¾	Road 1	23.76875346	29.6708828	0.00092136	1.53385663	0.623529434	0	40.6071	979.3154	655.7654	1.9708	2.2345	408	1.165358839	0.002691979	31.6436653	0.073096867
90.59699864	×ÔÉí³µÁ¾	Road 1	23.90640499	29.79449272	0.00092136	1.532819867	0.623529434	0	40.7384	979.3291	655.7656	1.9595	2.2458	409	2.441381327	0.005639591	31.68427064	0.073190665
90.61365458	×ÔÉí³µÁ¾	Road 1	24.04458717	29.86656303	0.00092136	1.53147006	0.623529434	0	40.9196	979.3486	655.7659	1.9433	2.262	410	1.647773696	0.003806357	31.71171587	0.073254064
90.63031199	×ÔÉí³µÁ¾	Road 1	24.1831146	29.93855095	0.00092136	1.530065417	0.615686297	0	41.0353	979.3613	655.766	1.9327	2.2726	411	1.649650339	0.003810692	31.73919478	0.07331754
90.64696574	×ÔÉí³µÁ¾	Road 1	24.32211025	30.04635429	0.00092136	1.526161313	0.615686297	0	41.2093	979.3789	655.7662	1.9183	2.287	412	2.211513658	0.005108597	31.77602476	0.073402617
90.66366054	×ÔÉí³µÁ¾	Road 1	24.46178081	30.11800232	0.00092136	1.522439957	0.615686297	0	41.3256	979.3916	655.7664	1.9077	2.2976	413	1.64994568	0.003811375	31.80357028	0.073466247
90.68032565	×ÔÉí³µÁ¾	Road 1	24.6015338	30.18946838	0.00092136	1.518344641	0.615686297	0	41.4422	979.4043	655.7666	1.8971	2.3091	414	1.652302657	0.003816819	31.83110608	0.073529855
90.69698453	×ÔÉí³µÁ¾	Road 1	24.74175257	30.30141563	0.00092136	1.514061213	0.615686297	0	41.626	979.4238	655.7668	1.8809	2.3253	415	2.292147356	0.00529486	31.86929068	0.073618061
90.71379992	×ÔÉí³µÁ¾	Road 1	24.88362082	30.37250404	0.000924832	1.512092829	0.615686297	0	41.7434	979.4355	655.767	1.8713	2.3349	416	1.64458015	0.00379898	31.89694495	0.073681943
90.73031218	×ÔÉí³µÁ¾	Road 1	25.02341974	30.4789444	0.000934425	1.508902669	0.615686297	0	41.9199	979.4551	655.7672	1.8549	2.3512	417	2.231996663	0.005155912	31.93380025	0.073767079
90.74700368	×ÔÉí³µÁ¾	Road 1	25.1650646	30.54976845	0.000959141	1.506884933	0.615686297	0	42.0379	979.4668	655.7674	1.8454	2.3608	418	1.656538518	0.003826604	31.96145036	0.07383095
90.76365156	×ÔÉí³µÁ¾	Road 1	25.30666642	30.62050667	0.000995201	1.505666971	0.615686297	0	42.1562	979.4795	655.7676	1.8348	2.3713	419	1.661260031	0.003837511	31.98910682	0.073894837
90.78031484	×ÔÉí³µÁ¾	Road 1	25.44891307	30.73153038	0.001044357	1.503250003	0.615686297	0	42.3426	979.499	655.7678	1.8186	2.3875	420	2.305334806	0.005325323	32.02752125	0.073983574
90.79699534	×ÔÉí³µÁ¾	Road 1	25.59163375	30.80209351	0.001113692	1.501789451	0.615686297	0	42.4616	979.5117	655.7679	1.8081	2.398	421	1.664342954	0.003844632	32.05528333	0.074047704
90.81367841	×ÔÉí³µÁ¾	Road 1	25.73470306	30.87258453	0.00117682	1.500754118	0.615686297	0	42.5809	979.5244	655.7681	1.7976	2.4085	422	1.666144462	0.003848794	32.08307973	0.074111914
90.8307504	×ÔÉí³µÁ¾	Road 1	25.88160858	30.97822838	0.001251837	1.499498367	0.615686297	0	42.7603	979.543	655.7684	1.7823	2.4238	423	2.194763095	0.005069903	32.1205487	0.074198467
90.84803242	×ÔÉí³µÁ¾	Road 1	26.03065934	31.04860611	0.00133663	1.498655558	0.615686297	0	42.8803	979.5557	655.7686	1.7717	2.4344	424	1.63293787	0.003772086	32.14876917	0.074263657
90.86455494	×ÔÉí³µÁ¾	Road 1	26.17364369	31.15406799	0.001417067	1.496801138	0.615686297	0	43.0607	979.5752	655.7688	1.7555	2.4506	425	2.257890935	0.005215728	32.18607521	0.074349834
90.88029559	×ÔÉí³µÁ¾	Road 1	26.31016893	31.2242981	0.001511495	1.496098161	0.615686297	0	43.1813	979.5879	655.7689	1.7449	2.4611	426	1.745445532	0.004031979	32.21354967	0.0744133
90.89704941	×ÔÉí³µÁ¾	Road 1	26.45580849	31.2945076	0.00158625	1.495268106	0.615686297	0	43.3022	979.6006	655.7692	1.7344	2.4716	427	1.67547848	0.003870355	32.24162032	0.074478143
90.91370718	×ÔÉí³µÁ¾	Road 1	26.6010538	31.38972816	0.00165573	1.494796395	0.615686297	0	43.4321	979.6143	655.7693	1.7231	2.4829	428	2.092442128	0.004833541	32.27647576	0.074558659
90.93033197	×ÔÉí³µÁ¾	Road 1	26.74640457	31.47485504	0.001714063	1.493507624	0.615686297	0	43.6144	979.6338	655.7695	1.7069	2.4991	429	1.935716447	0.004471505	32.30865663	0.074632997
90.94697985	×ÔÉí³µÁ¾	Road 1	26.89228121	31.54491005	0.001760368	1.492658973	0.615686297	0	43.7363	979.6465	655.7697	1.6964	2.5096	430	1.691231671	0.003906745	32.33681206	0.074698036
90.96375493	×ÔÉí³µÁ¾	Road 1	27.03962193	31.61992264	0.0017872	1.491783023	0.615686297	0	43.8671	979.6602	655.7699	1.6851	2.5219	431	1.76640535	0.004080396	32.36644364	0.074766485
90.9803042	×ÔÉí³µÁ¾	Road 1	27.18546197	31.72490044	0.001802072	1.491521716	0.615686297	0	44.0509	979.6797	655.7701	1.6689	2.5381	432	2.283000538	0.005273731	32.40422565	0.074853761
90.99696088	×ÔÉí³µÁ¾	Road 1	27.3325721	31.79484215	0.001806143	1.490193129	0.615686297	0	44.1737	979.6924	655.7703	1.6584	2.5485	433	1.699789728	0.003926514	32.4325385	0.074919164
91.01372716	×ÔÉí³µÁ¾	Road 1	27.48116168	31.90466423	0.00181294	1.489103913	0.615686297	0	44.3673	979.7129	655.7706	1.6414	2.5655	434	2.351049289	0.005430924	32.47195685	0.07501022
91.03034388	×ÔÉí³µÁ¾	Road 1	27.62874826	31.97451668	0.001827955	1.4886235	0.615686297	0	44.4908	979.7256	655.7708	1.6309	2.576	435	1.709012885	0.00394782	32.50035504	0.07507582
91.04699983	×ÔÉí³µÁ¾	Road 1	27.77700615	32.04431763	0.001873497	1.487554193	0.615686297	0	44.6147	979.7393	655.7709	1.6195	2.5874	436	1.708498891	0.003946632	32.5288117	0.075141555
91.06367044	×ÔÉí³µÁ¾	Road 1	27.92587928	32.14899673	0.00194964	1.487292647	0.615686297	0	44.8009	979.7588	655.7712	1.6043	2.6035	437	2.291780107	0.005294012	32.56701707	0.075229809
91.08028313	×ÔÉí³µÁ¾	Road 1	28.07455702	32.21873245	0.002048424	1.485979557	0.615686297	0	44.9254	979.7715	655.7714	1.5939	2.614	438	1.718115963	0.003968848	32.5955596	0.075295743
91.09702595	×ÔÉí³µÁ¾	Road 1	28.22472346	32.2884201	0.002212082	1.485527992	0.607843161	0	45.0501	979.7842	655.7715	1.5834	2.6244	439	1.711292879	0.003953087	32.62421147	0.075361928
91.11375777	×ÔÉí³µÁ¾	Road 1	28.37527622	32.39276276	0.002390774	1.481207371	0.607843161	0	45.2378	979.8047	655.7717	1.5663	2.6415	440	2.294872368	0.005301155	32.66260886	0.075450626
91.13072749	×ÔÉí³µÁ¾	Road 1	28.5282965	32.46212082	0.002580562	1.477673531	0.607843161	0	45.3632	979.8174	655.772	1.5559	2.6519	441	1.697859126	0.003922055	32.69142105	0.075517183
91.14721225	×ÔÉí³µÁ¾	Road 1	28.67741866	32.56581802	0.002789197	1.472980738	0.607843161	0	45.5518	979.8369	655.7722	1.5398	2.669	442	2.320821963	0.005361099	32.72967925	0.075605559
91.16363323	×ÔÉí³µÁ¾	Road 1	28.82627843	32.63478127	0.00297457	1.470579028	0.607843161	0	45.6779	979.8506	655.7723	1.5284	2.6804	443	1.737012409	0.004012499	32.7582027	0.075671448
91.18031997	×ÔÉí³µÁ¾	Road 1	28.97786632	32.70360374	0.003158115	1.467344999	0.607843161	0	45.8043	979.8633	655.7725	1.518	2.6908	444	1.718783221	0.003970389	32.78688358	0.075737701
91.19705912	×ÔÉí³µÁ¾	Road 1	29.1304096	32.8066658	0.003386084	1.465389013	0.607843161	0	45.9943	979.8838	655.7728	1.5009	2.7078	445	2.298003833	0.005308389	32.82535022	0.075826559
91.21371067	×ÔÉí³µÁ¾	Road 1	29.28247186	32.87527542	0.003629091	1.463969707	0.607843161	0	46.1214	979.8965	655.7729	1.4906	2.7182	446	1.725086777	0.00398495	32.85407558	0.075892915
91.23074856	×ÔÉí³µÁ¾	Road 1	29.43838648	32.94377518	0.003926591	1.461695433	0.607843161	0	46.2487	979.9102	655.7731	1.4792	2.7296	447	1.699654378	0.003926202	32.88303412	0.075959809
91.24798257	×ÔÉí³µÁ¾	Road 1	29.59658705	33.04641495	0.004314706	1.46003592	0.607843161	0	46.4401	979.9297	655.7734	1.4632	2.7456	448	2.255239609	0.005209603	32.92190093	0.076049591
91.26360336	×ÔÉí³µÁ¾	Road 1	29.74027566	33.11477737	0.004704416	1.459382534	0.607843161	0	46.5681	979.9434	655.7736	1.4518	2.7579	449	1.808684709	0.004178062	32.95015401	0.076114856
91.28030622	×ÔÉí³µÁ¾	Road 1	29.89439294	33.21719055	0.005171479	1.456887126	0.607843161	0	46.7605	979.9639	655.7738	1.4348	2.775	450	2.315756651	0.005349398	32.98883378	0.076204206
91.2969728	×ÔÉí³µÁ¾	Road 1	30.04849113	33.28539162	0.005607571	1.456163883	0.607843161	0	46.8892	979.9766	655.7739	1.4245	2.7853	451	1.734775383	0.004007331	33.01774654	0.076270995
91.31585117	×ÔÉí³µÁ¾	Road 1	30.22360112	33.39249115	0.006088859	1.455026865	0.607843161	0	47.0918	979.998	655.7743	1.4067	2.8031	452	2.194230193	0.005068672	33.05917004	0.076366683
91.33131617	×ÔÉí³µÁ¾	Road 1	30.36734232	33.46059952	0.006609818	1.454550743	0.607843161	0	47.2211	980.0107	655.7744	1.3963	2.8135	453	1.832447823	0.004232954	33.08750886	0.076432145
91.34696372	×ÔÉí³µÁ¾	Road 1	30.51307592	33.52863579	0.007310364	1.452571034	0.607843161	0	47.3507	980.0244	655.7746	1.385	2.8258	454	1.81936233	0.004202727	33.11597742	0.076497908
91.36368125	×ÔÉí³µÁ¾	Road 1	30.66909049	33.59662399	0.007879756	1.452221513	0.607843161	0	47.4806	980.0381	655.7748	1.3737	2.8371	455	1.740895668	0.004021469	33.14508089	0.076565137
91.38034453	×ÔÉí³µÁ¾	Road 1	30.82509301	33.7034008	0.008371833	1.451672792	0.607843161	0	47.6851	980.0586	655.775	1.3569	2.8539	456	2.425574938	0.005603078	33.18549891	0.076658502
91.39697188	×ÔÉí³µÁ¾	Road 1	30.98107286	33.77130661	0.008998358	1.450077653	0.607843161	0	47.8157	980.0723	655.7752	1.3456	2.8652	457	1.753380713	0.004050309	33.21465299	0.076725848
91.41362233	×ÔÉí³µÁ¾	Road 1	31.13758322	33.83917122	0.009560218	1.449719071	0.607843161	0	47.9464	980.0859	655.7754	1.3343	2.8774	458	1.753926842	0.004051571	33.24385666	0.076793309
91.4305158	×ÔÉí³µÁ¾	Road 1	31.29687806	33.9457386	0.010110708	1.449096322	0.607843161	0	48.1525	980.1064	655.7756	1.3176	2.8942	459	2.411679612	0.00557098	33.2845983	0.076887422
91.44749248	×ÔÉí³µÁ¾	Road 1	31.45727712	34.01351395	0.010730856	1.447706103	0.600000024	0	48.284	980.1201	655.7758	1.3063	2.9055	460	1.736881374	0.004012196	33.31408479	0.076955536
91.46362315	×ÔÉí³µÁ¾	Road 1	31.60998611	34.08118629	0.011242089	1.445035815	0.600000024	0	48.4157	980.1338	655.776	1.296	2.9177	461	1.799473806	0.004156784	33.3431115	0.077022588
91.48027653	×ÔÉí³µÁ¾	Road 1	31.76811124	34.18228111	0.011774044	1.437517285	0.600000024	0	48.6138	980.1533	655.7762	1.2801	2.9337	462	2.356459378	0.005443421	33.38235451	0.077113239
91.498071	×ÔÉí³µÁ¾	Road 1	31.93740248	34.24932175	0.012205666	1.430933356	0.600000024	0	48.7462	980.167	655.7764	1.2688	2.9459	463	1.680403224	0.003881731	33.4122564	0.077182312
91.51479549	×ÔÉí³µÁ¾	Road 1	32.09697893	34.34933853	0.01258321	1.423433423	0.600000024	0	48.9453	980.1875	655.7767	1.2519	2.9628	464	2.339793754	0.005404924	33.45138826	0.077272707
91.53092799	×ÔÉí³µÁ¾	Road 1	32.25120448	34.41573715	0.01291799	1.419238925	0.600000024	0	49.0784	980.2002	655.7769	1.2417	2.9741	465	1.790626716	0.004136348	33.48027555	0.077339437
91.54750183	×ÔÉí³µÁ¾	Road 1	32.40997577	34.4866848	0.013130849	1.416231275	0.600000024	0	49.2212	980.2148	655.777	1.2296	2.9861	466	1.842708128	0.004256656	33.51081629	0.077409986
91.56367355	×ÔÉí³µÁ¾	Road 1	32.56519187	34.55277443	0.013222787	1.414042115	0.600000024	0	49.3548	980.2275	655.7772	1.2193	2.9974	467	1.787894526	0.004130036	33.53972963	0.077476775
91.58028331	×ÔÉí³µÁ¾	Road 1	32.72498221	34.63296776	0.013238151	1.413586378	0.600000024	0	49.4982	980.2422	655.7773	1.2073	3.0104	468	2.012727126	0.0046494	33.57316054	0.077554001
91.59699791	×ÔÉí³µÁ¾	Road 1	32.88619669	34.72247887	0.013238151	1.411695361	0.600000024	0	49.6995	980.2617	655.7776	1.1924	3.0263	469	2.17495163	0.005024138	33.60951397	0.077637977
91.61366411	×ÔÉí³µÁ¾	Road 1	33.0472498	34.78842773	0.013238151	1.411838055	0.600000024	0	49.8341	980.2754	655.7778	1.1812	3.0385	470	1.75909671	0.004063513	33.63883144	0.077705701
91.6306375	×ÔÉí³µÁ¾	Road 1	33.21173765	34.88734589	0.013207434	1.41236496	0.600000024	0	50.0363	980.2949	655.7781	1.1653	3.0553	471	2.325922973	0.005372882	33.67831022	0.077796897
91.64700313	×ÔÉí³µÁ¾	Road 1	33.3706356	34.95328445	0.013166552	1.41188252	0.600000024	0	50.1715	980.3086	655.7782	1.1541	3.0675	472	1.787758982	0.004129723	33.70756803	0.077864482
91.66364881	×ÔÉí³µÁ¾	Road 1	33.53264466	35.03807487	0.013130849	1.412209868	0.600000024	0	50.3166	980.3223	655.7784	1.1431	3.0785	473	2.113057252	0.004881162	33.74274131	0.077945732
91.68031722	×ÔÉí³µÁ¾	Road 1	33.69526754	35.12287216	0.013085041	1.412530303	0.600000024	0	50.5202	980.3428	655.7787	1.1263	3.0963	474	2.115468838	0.004886733	33.77800281	0.078027186
91.69699809	×ÔÉí³µÁ¾	Road 1	33.85831768	35.18884163	0.013049487	1.41269052	0.600000024	0	50.6563	980.3555	655.7788	1.117	3.1075	475	1.775221959	0.004100763	33.80761505	0.078095591
91.71367199	×ÔÉí³µÁ¾	Road 1	34.021758	35.28778038	0.013034268	1.41256845	0.600000024	0	50.861	980.375	655.7791	1.1012	3.1243	476	2.381456456	0.005501164	33.84732324	0.078187317
91.73032794	×ÔÉí³µÁ¾	Road 1	34.18532743	35.35373955	0.013034268	1.412241817	0.600000024	0	50.9977	980.3887	655.7793	1.0901	3.1365	477	1.783758219	0.004120481	33.87703341	0.078255947
91.74694686	×ÔÉí³µÁ¾	Road 1	34.34883782	35.41970901	0.013034268	1.413200021	0.600000024	0	51.1347	980.4014	655.7794	1.0799	3.1477	478	1.789416197	0.004133551	33.90677158	0.078324642
91.76361637	×ÔÉí³µÁ¾	Road 1	34.51330424	35.5186924	0.013034268	1.413242579	0.600000024	0	51.3407	980.4209	655.7797	1.0641	3.1644	479	2.396392952	0.005535668	33.94671827	0.078416919
91.78027965	×ÔÉí³µÁ¾	Road 1	34.67801459	35.5846756	0.013034268	1.412706017	0.600000024	0	51.4783	980.4346	655.7798	1.0539	3.1756	480	1.793365138	0.004142673	33.97660161	0.07848595
91.79707635	×ÔÉí³µÁ¾	Road 1	34.84450566	35.68366241	0.013074877	1.412961245	0.600000024	0	51.6853	980.4541	655.78	1.0382	3.1933	481	2.392357204	0.005526345	34.01678532	0.078578774
91.81516809	×ÔÉí³µÁ¾	Road 1	35.02416501	35.74965591	0.013141043	1.412678361	0.600000024	0	51.8236	980.4668	655.7803	1.028	3.2035	482	1.703965131	0.003936159	34.04761303	0.078649986
91.83085376	×ÔÉí³µÁ¾	Road 1	35.18021845	35.81564255	0.013233028	1.413174033	0.600000024	0	51.9621	980.4805	655.7804	1.0169	3.2157	483	1.879449557	0.004341528	34.07709345	0.078718086
91.84696207	×ÔÉí³µÁ¾	Road 1	35.34091976	35.914674	0.013387288	1.414527535	0.607843161	0	52.1704	980.5	655.7806	1.0012	3.2324	484	2.484836227	0.005739972	34.11711997	0.078810547
91.86365724	×ÔÉí³µÁ¾	Road 1	35.50778242	35.98080826	0.013563559	1.417645454	0.607843161	0	52.3096	980.5127	655.7808	0.992	3.2435	485	1.81046058	0.004182164	34.14734591	0.078880369
91.88034178	×ÔÉí³µÁ¾	Road 1	35.67484623	36.04713478	0.013757135	1.421961904	0.615686297	0	52.4491	980.5254	655.781	0.9818	3.2547	486	1.817615649	0.004198692	34.17767198	0.078950422
91.89696363	×ÔÉí³µÁ¾	Road 1	35.84174399	36.1471035	0.014037614	1.430509567	0.615686297	0	52.6588	980.5449	655.7813	0.9661	3.2714	487	2.457305549	0.005676376	34.21851696	0.079044774
91.91363167	×ÔÉí³µÁ¾	Road 1	36.00941578	36.2141201	0.014321879	1.43707037	0.615686297	0	52.7989	980.5586	655.7814	0.955	3.2835	488	1.8388144	0.004247661	34.24916639	0.079115574
91.93037303	×ÔÉí³µÁ¾	Road 1	36.17829498	36.31517372	0.014659257	1.44406569	0.615686297	0	53.0095	980.5781	655.7816	0.9393	3.3002	489	2.474175497	0.005715345	34.29058744	0.079211257
91.94698022	×ÔÉí³µÁ¾	Road 1	36.34613282	36.38280144	0.015220131	1.447349668	0.615686297	0	53.1503	980.5908	655.7817	0.9302	3.3113	490	1.862163734	0.004301598	34.32151275	0.079282694
91.96369481	×ÔÉí³µÁ¾	Road 1	36.51537095	36.45061798	0.015858617	1.450810194	0.615686297	0	53.2913	980.6035	655.782	0.9201	3.3214	491	1.860394988	0.004297512	34.3526085	0.079354526
91.98140241	×ÔÉí³µÁ¾	Road 1	36.69516453	36.55250244	0.016603934	1.452415228	0.615686297	0	53.5034	980.623	655.7822	0.9044	3.3381	492	2.399281368	0.00554234	34.395094	0.079452667
91.9975833	×ÔÉí³µÁ¾	Road 1	36.85976232	36.62049065	0.017532403	1.453733444	0.615686297	0	53.6451	980.6357	655.7823	0.8943	3.3492	493	1.913336764	0.004419808	34.42605349	0.079524184
92.01360693	×ÔÉí³µÁ¾	Road 1	37.02306335	36.68853378	0.018494856	1.45403266	0.615686297	0	53.7871	980.6484	655.7825	0.8842	3.3603	494	1.930483633	0.004459417	34.45698685	0.07959564
92.03030356	×ÔÉí³µÁ¾	Road 1	37.1936964	36.7905899	0.019392606	1.454225898	0.615686297	0	54.0005	980.668	655.7827	0.8696	3.3769	495	2.526843479	0.005837008	34.49917663	0.079693098
92.04700056	×ÔÉí³µÁ¾	Road 1	37.36464882	36.85864334	0.020312132	1.454308867	0.615686297	0	54.1432	980.6807	655.783	0.8595	3.388	496	1.883746766	0.004351455	34.53062955	0.079765754
92.06368217	×ÔÉí³µÁ¾	Road 1	37.53591648	36.96068916	0.02130246	1.454015732	0.615686297	0	54.3577	980.7002	655.7832	0.8439	3.4046	497	2.538711465	0.005864423	34.57297933	0.079863582
92.08030256	×ÔÉí³µÁ¾	Road 1	37.70689218	37.03358002	0.022317206	1.454039454	0.615686297	0	54.5112	980.7139	655.7833	0.833	3.4165	498	1.99024865	0.004597474	34.60605803	0.079939994
92.09697719	×ÔÉí³µÁ¾	Road 1	37.87874085	37.10156479	0.023506129	1.452722907	0.615686297	0	54.6548	980.7266	655.7834	0.8229	3.4276	499	1.894625421	0.004376585	34.63765023	0.080012972
92.11367529	×ÔÉí³µÁ¾	Road 1	38.05130423	37.20352821	0.024558205	1.452273846	0.615686297	0	54.8708	980.7451	655.7837	0.8093	3.4441	500	2.54991561	0.005890305	34.68022897	0.080111329
92.13030448	×ÔÉí³µÁ¾	Road 1	38.22346951	37.27151642	0.02560143	1.452617049	0.615686297	0	55.015	980.7578	655.7839	0.7992	3.4552	501	1.905588055	0.004401908	34.71191735	0.080184529
92.14775072	×ÔÉí³µÁ¾	Road 1	38.4044937	37.35401344	0.026829382	1.451369524	0.615686297	0	55.1906	980.7725	655.7841	0.7878	3.4676	502	2.115310197	0.004886367	34.74882156	0.080269778
92.16414824	×ÔÉí³µÁ¾	Road 1	38.57494563	37.42192955	0.027901825	1.451024055	0.615686297	0	55.3355	980.7852	655.7842	0.7777	3.4787	503	1.929316272	0.004456721	34.78045757	0.080342857
92.1805322	×ÔÉí³µÁ¾	Road 1	38.74574226	37.52864799	0.029054355	1.450938582	0.615686297	0	55.5637	980.8047	655.7844	0.7633	3.496	504	2.701385025	0.006240199	34.82471695	0.080445096
92.19698911	×ÔÉí³µÁ¾	Road 1	38.91760964	37.5965332	0.030069672	1.450164437	0.615686297	0	55.7093	980.8164	655.7845	0.7542	3.506	505	1.931463652	0.004461681	34.85650287	0.080518522
92.2138177	×ÔÉí³µÁ¾	Road 1	39.09367607	37.66441841	0.031063115	1.450453758	0.615686297	0	55.8551	980.8291	655.7848	0.7442	3.5171	506	1.904783098	0.004400049	34.88855768	0.080592568
92.23070861	×ÔÉí³µÁ¾	Road 1	39.27087211	37.76622047	0.032022774	1.449504852	0.615686297	0	56.0744	980.8467	655.785	0.7315	3.5327	507	2.558157554	0.005909344	34.93176729	0.080692382
92.24740597	×ÔÉí³µÁ¾	Road 1	39.44635245	37.83406448	0.033039689	1.448652983	0.615686297	0	56.221	980.8584	655.7852	0.7225	3.5428	508	1.921567724	0.004438821	34.96385241	0.080766499
92.26362352	×ÔÉí³µÁ¾	Road 1	39.6171175	37.90673904	0.033857051	1.44862175	0.615686297	0	56.3783	980.8711	655.7853	0.7126	3.5546	509	2.061425429	0.004761893	34.99728366	0.080843725
92.28029852	×ÔÉí³µÁ¾	Road 1	39.79317078	38.00848961	0.034707263	1.448171973	0.615686297	0	56.599	980.8887	655.7855	0.7	3.5702	510	2.597246801	0.00599964	35.04059277	0.080943769
92.29762123	×ÔÉí³µÁ¾	Road 1	39.97638882	38.07631302	0.035364043	1.447817087	0.615686297	0	56.7465	980.9004	655.7856	0.691	3.5813	511	1.883345206	0.004350527	35.07321741	0.081019132
92.31358072	×ÔÉí³µÁ¾	Road 1	40.14551065	38.14900475	0.03590934	1.448158741	0.615686297	0	56.9048	980.9131	655.7858	0.6821	3.5921	512	2.096911485	0.004843866	35.10668305	0.081096438
92.33028908	×ÔÉí³µÁ¾	Road 1	40.32304039	38.25073128	0.036359638	1.447176576	0.615686297	0	57.127	980.9297	655.786	0.6696	3.6077	513	2.607409321	0.006023116	35.15024859	0.081197074
92.34700404	×ÔÉí³µÁ¾	Road 1	40.50095536	38.31859932	0.036611427	1.448392987	0.615686297	0	57.2755	980.9414	655.7861	0.6615	3.6187	514	1.941410347	0.004484658	35.18269918	0.081272035
92.36369078	×ÔÉí³µÁ¾	Road 1	40.67888451	38.38647423	0.036712464	1.448352456	0.615686297	0	57.4243	980.9521	655.7863	0.6535	3.6278	515	1.946732488	0.004496952	35.21518379	0.081347075
92.38026242	×ÔÉí³µÁ¾	Road 1	40.85607734	38.49313087	0.036722578	1.447514296	0.615686297	0	57.6586	980.9697	655.7864	0.6411	3.6441	516	2.73743524	0.006323475	35.26054758	0.081451865
92.39694036	×ÔÉí³µÁ¾	Road 1	41.0347215	38.56106071	0.036722578	1.448930979	0.615686297	0	57.808	980.9805	655.7866	0.6331	3.6541	517	1.956037497	0.004518447	35.29317025	0.081527223
92.41368904	×ÔÉí³µÁ¾	Road 1	41.21452986	38.64841576	0.036702354	1.448558807	0.615686297	0	57.9577	980.9922	655.7867	0.6251	3.6661	518	2.340645589	0.005406891	35.33237298	0.081617782
92.43032592	×ÔÉí³µÁ¾	Road 1	41.39351921	38.73090935	0.036672026	1.449041963	0.615686297	0	58.1828	981.0078	655.7869	0.6135	3.6797	519	2.259132215	0.005218595	35.3699579	0.081704603
92.44701596	×ÔÉí³µÁ¾	Road 1	41.57339565	38.79891129	0.03665182	1.449757099	0.615686297	0	58.3332	981.0186	655.787	0.6065	3.6897	520	1.966716523	0.004543115	35.40278247	0.081780428
92.46363195	×ÔÉí³µÁ¾	Road 1	41.75294493	38.90092621	0.036611427	1.449999571	0.615686297	0	58.5593	981.0342	655.7872	0.595	3.7042	521	2.663859958	0.006153517	35.44704514	0.081882674
92.48133734	×ÔÉí³µÁ¾	Road 1	41.94460056	38.96892815	0.036560975	1.45023489	0.615686297	0	58.7104	981.0449	655.7874	0.5879	3.7142	522	1.895405675	0.004378387	35.48060405	0.081960195
92.49693944	×ÔÉí³µÁ¾	Road 1	42.11378351	39.03697472	0.036470283	1.450337172	0.615686297	0	58.8617	981.0547	655.7875	0.5809	3.7232	523	2.0736766	0.004790193	35.51295775	0.082034932
92.51364267	×ÔÉí³µÁ¾	Road 1	42.29531271	39.12447395	0.036369689	1.450749516	0.615686297	0	59.035	981.0664	655.7876	0.5733	3.7347	524	2.37351158	0.005482812	35.55260306	0.082126513
92.53106912	×ÔÉí³µÁ¾	Road 1	42.4851489	39.21684837	0.03624922	1.450031281	0.607843161	0	59.263	981.082	655.7877	0.5628	3.7491	525	2.399409871	0.005542637	35.59441625	0.082223102
92.54889364	×ÔÉí³µÁ¾	Road 1	42.67968225	39.28968773	0.036069017	1.447683096	0.607843161	0	59.4262	981.0928	655.7878	0.555	3.7588	526	1.991821742	0.004601108	35.62991952	0.082305114
92.56446238	×ÔÉí³µÁ¾	Road 1	42.85003611	39.3913662	0.03590934	1.442618608	0.607843161	0	59.6553	981.1074	655.788	0.5455	3.7732	527	2.826764594	0.006529826	35.67392869	0.082406775
92.58024556	×ÔÉí³µÁ¾	Road 1	43.02303264	39.45894928	0.035730265	1.439677835	0.607843161	0	59.8083	981.1172	655.7881	0.5385	3.7822	528	2.065818322	0.00477204	35.70653386	0.082482093
92.59707305	×ÔÉí³µÁ¾	Road 1	43.20779103	39.52639847	0.035581492	1.43724966	0.607843161	0	59.9616	981.127	655.7882	0.5325	3.7911	529	1.975429959	0.004563243	35.73977539	0.082558881
92.61358824	×ÔÉí³µÁ¾	Road 1	43.38942936	39.59373779	0.035462774	1.435757518	0.607843161	0	60.1152	981.1357	655.7883	0.5265	3.7991	530	2.001927324	0.004624452	35.7728376	0.082635255
92.63027351	×ÔÉí³µÁ¾	Road 1	43.57345028	39.70420189	0.03539364	1.433594465	0.607843161	0	60.368	981.1514	655.7885	0.5165	3.814	531	2.877279462	0.006646516	35.82084578	0.082746154
92.64694118	×ÔÉí³µÁ¾	Road 1	43.75758823	39.77139359	0.035364043	1.433406591	0.607843161	0	60.5223	981.1611	655.7886	0.5105	3.8229	532	1.993719718	0.004605493	35.85407645	0.082822917
92.66365541	×ÔÉí³µÁ¾	Road 1	43.94255219	39.83853035	0.035364043	1.432110906	0.607843161	0	60.6769	981.1699	655.7887	0.5045	3.8309	533	1.991588897	0.00460057	35.88736432	0.082899812
92.68026737	×ÔÉí³µÁ¾	Road 1	44.1267163	39.91045303	0.035364043	1.433026552	0.607843161	0	60.8427	981.1797	655.7888	0.4988	3.8396	534	2.102361089	0.004856454	35.92228865	0.082980487
92.69694824	×ÔÉí³µÁ¾	Road 1	44.31215534	40.02072487	0.035364043	1.432036042	0.607843161	0	61.0977	981.1953	655.789	0.4878	3.8545	535	2.894478451	0.006686245	35.97057108	0.083092019
92.71391612	×ÔÉí³µÁ¾	Road 1	44.50107877	40.08303795	0.035383772	1.432662249	0.607843161	0	61.2421	981.2031	655.7891	0.4836	3.8616	536	1.882879644	0.004349452	36.00251956	0.08316582
92.73027442	×ÔÉí³µÁ¾	Road 1	44.68354182	40.15496407	0.035403512	1.432328701	0.607843161	0	61.409	981.2129	655.7892	0.4769	3.8703	537	2.136760624	0.004935917	36.03747333	0.083246563
92.74691021	×ÔÉí³µÁ¾	Road 1	44.86952084	40.24604073	0.035413384	1.432373881	0.607843161	0	61.5762	981.2217	655.7892	0.4721	3.879	538	2.515015146	0.005809685	36.07931258	0.083343212
92.76360464	×ÔÉí³µÁ¾	Road 1	45.05653353	40.32755585	0.035423256	1.432957172	0.607843161	0	61.8108	981.2354	655.7894	0.4637	3.8913	539	2.313632747	0.005344492	36.11793737	0.083432435
92.78025545	×ÔÉí³µÁ¾	Road 1	45.24336803	40.39467545	0.035423256	1.432592511	0.607843161	0	61.9676	981.2432	655.7895	0.4587	3.8982	540	2.020196238	0.004666653	36.15157528	0.083510139
92.79699717	×ÔÉí³µÁ¾	Road 1	45.431557	40.46659126	0.035423256	1.433283329	0.607843161	0	62.1358	981.2529	655.7896	0.453	3.9069	541	2.11562695	0.004887098	36.18699451	0.083591957
92.81365385	×ÔÉí³µÁ¾	Road 1	45.61916727	40.54812012	0.035423256	1.433047771	0.607843161	0	62.3269	981.2627	655.7897	0.4467	3.9161	542	2.328818065	0.00537957	36.22578489	0.083681563
92.8303032	×ÔÉí³µÁ¾	Road 1	45.80707193	40.62962837	0.035423256	1.433053374	0.607843161	0	62.5183	981.2725	655.7898	0.4414	3.9244	543	2.333222222	0.005389743	36.26463151	0.083771299
92.8469738	×ÔÉí³µÁ¾	Road 1	45.99568296	40.7303524	0.035423256	1.434115887	0.607843161	0	62.6988	981.2822	655.7899	0.436	3.9348	544	2.740894459	0.006331466	36.31032389	0.083876848
92.86371699	×ÔÉí³µÁ¾	Road 1	46.18547196	40.80707474	0.035423256	1.432850122	0.607843161	0	62.9363	981.2939	655.79	0.4286	3.9441	545	2.231835249	0.005155539	36.34769192	0.083963168
92.8802615	×ÔÉí³µÁ¾	Road 1	46.37347179	40.90778847	0.035423256	1.434257388	0.607843161	0	63.1744	981.3057	655.7902	0.4222	3.9544	546	2.767579418	0.006393108	36.39348017	0.084068939
92.89699662	×ÔÉí³µÁ¾	Road 1	46.56394974	40.9749424	0.03539364	1.433461666	0.607843161	0	63.3334	981.3135	655.7902	0.4173	3.9613	547	2.038463764	0.004708851	36.42759411	0.084147742
92.91428451	×ÔÉí³µÁ¾	Road 1	46.7610647	41.04687881	0.035354178	1.433496714	0.607843161	0	63.5041	981.3213	655.7903	0.4135	3.969	548	2.094006546	0.004837155	36.46379506	0.084231367
92.9302517	×ÔÉí³µÁ¾	Road 1	46.94356798	41.14762688	0.03528519	1.434410572	0.607843161	0	63.7436	981.333	655.7904	0.4072	3.9793	549	2.860997246	0.006608904	36.50947713	0.084336892
92.94693073	×ÔÉí³µÁ¾	Road 1	47.13451875	41.21477394	0.035176955	1.433864713	0.607843161	0	63.9036	981.3398	655.7904	0.4033	3.9851	550	2.053301563	0.004743127	36.54372422	0.084416003
92.96358595	×ÔÉí³µÁ¾	Road 1	47.32550757	41.28195877	0.035039529	1.434239984	0.607843161	0	64.0639	981.3477	655.7905	0.3993	3.992	551	2.059022135	0.004756341	36.57801767	0.084495221
92.98031227	×ÔÉí³µÁ¾	Road 1	47.51778011	41.38274117	0.034814529	1.434370399	0.607843161	0	64.3048	981.3584	655.7906	0.393	4.0013	552	2.774088895	0.006408145	36.62441798	0.084602406
92.9969048	×ÔÉí³µÁ¾	Road 1	47.70882435	41.44993286	0.034503095	1.435049772	0.607843161	0	64.4657	981.3652	655.7906	0.3901	4.0082	553	2.071786448	0.004785827	36.65879416	0.084681815
93.01357321	×ÔÉí³µÁ¾	Road 1	47.90105349	41.51715546	0.034164593	1.435630441	0.607843161	0	64.6269	981.3721	655.7908	0.3862	4.0141	554	2.06871724	0.004778737	36.69327639	0.084761468
93.03028634	×ÔÉí³µÁ¾	Road 1	48.09428889	41.62281647	0.033713527	1.43571651	0.607843161	0	64.8808	981.3828	655.7908	0.381	4.0232	555	2.894904515	0.006687229	36.74165929	0.084873233
93.04976879	×ÔÉí³µÁ¾	Road 1	48.31993292	41.69486618	0.033143494	1.435850024	0.607843161	0	65.0542	981.3896	655.7909	0.3783	4.0289	556	1.955693808	0.004517653	36.77976102	0.084961248
93.06564507	×ÔÉí³µÁ¾	Road 1	48.50427679	41.80059242	0.032570582	1.436676741	0.607843161	0	65.3091	981.4004	655.791	0.3723	4.0389	557	3.027707168	0.006994004	36.82782975	0.085072287
93.08118339	×ÔÉí³µÁ¾	Road 1	48.68496618	41.86308403	0.031737417	1.437831044	0.607843161	0	65.4601	981.4063	655.791	0.3701	4.044	558	2.079512492	0.004803674	36.86014187	0.085146928
93.09804204	×ÔÉí³µÁ¾	Road 1	48.88132493	41.93049202	0.031017901	1.437997341	0.607843161	0	65.6229	981.4131	655.7911	0.3663	4.0499	559	2.073838531	0.004790567	36.89510399	0.08522769
93.11358512	×ÔÉí³µÁ¾	Road 1	49.06267268	42.00273743	0.030380597	1.439136147	0.607843161	0	65.7977	981.4189	655.7911	0.3646	4.0546	560	2.312426076	0.005341704	36.93104621	0.085310717
93.13024143	×ÔÉí³µÁ¾	Road 1	49.25749917	42.1086834	0.029576616	1.438956022	0.607843161	0	66.0545	981.4287	655.7912	0.3605	4.0626	561	2.93927652	0.006789729	36.98000372	0.085423809
93.14698755	×ÔÉí³µÁ¾	Road 1	49.45368987	42.17613602	0.028873026	1.439639211	0.607843161	0	66.2183	981.4355	655.7913	0.3566	4.0685	562	2.094992584	0.004839433	37.01508671	0.08550485
93.1637311	×ÔÉí³µÁ¾	Road 1	49.65016429	42.24359894	0.028223099	1.440180302	0.607843161	0	66.3824	981.4414	655.7913	0.3547	4.0733	563	2.098315023	0.004847108	37.05021995	0.085586008
93.180335	×ÔÉí³µÁ¾	Road 1	49.84546653	42.34476929	0.027591357	1.440360665	0.607843161	0	66.629	981.4502	655.7914	0.3504	4.0816	564	2.85643412	0.006598363	37.09764788	0.085695567
93.19697811	×ÔÉí³µÁ¾	Road 1	50.04154213	42.41226311	0.026944419	1.441213369	0.607843161	0	66.7937	981.4561	655.7914	0.3486	4.0864	565	2.115084142	0.004885844	37.13284947	0.085776882
93.21374989	×ÔÉí³µÁ¾	Road 1	50.23944798	42.47976036	0.026437461	1.441536427	0.607843161	0	66.9587	981.4619	655.7915	0.3457	4.0903	566	2.106638045	0.004866334	37.16818154	0.085858499
93.23023648	×ÔÉí³µÁ¾	Road 1	50.43447441	42.58581619	0.026017208	1.441562057	0.607843161	0	67.2185	981.4707	655.7916	0.3426	4.0983	567	2.995729098	0.006920134	37.21757091	0.085972589
93.24690086	×ÔÉí³µÁ¾	Road 1	50.63191626	42.65330315	0.025681041	1.441819191	0.607843161	0	67.3841	981.4766	655.7916	0.3398	4.1022	568	2.123349225	0.004904937	37.2529552	0.086054327
93.26398201	×ÔÉí³µÁ¾	Road 1	50.83461634	42.72079353	0.02546647	1.441967607	0.607843161	0	67.55	981.4814	655.7916	0.3389	4.106	569	2.089858065	0.004827572	37.28865238	0.086136787
93.2802527	×ÔÉí³µÁ¾	Road 1	51.02813469	42.81722946	0.025363587	1.442469716	0.607843161	0	67.7281	981.4873	655.7917	0.3363	4.1116	570	2.823683064	0.006522708	37.33459566	0.086242916
93.29699992	×ÔÉí³µÁ¾	Road 1	51.22767937	42.89433975	0.025347782	1.44180274	0.607843161	0	67.9779	981.4961	655.7917	0.333	4.1179	571	2.338888723	0.005402833	37.37376554	0.086333398
93.31397404	×ÔÉí³µÁ¾	Road 1	51.43024568	42.96180954	0.025347782	1.442215085	0.607843161	0	68.1448	981.501	655.7917	0.3312	4.1217	572	2.108755517	0.004871225	37.4095598	0.086416083
93.33022237	×ÔÉí³µÁ¾	Road 1	51.62462925	43.06785164	0.025347782	1.442833304	0.607843161	0	68.4076	981.5088	655.7918	0.3292	4.1277	573	3.06102752	0.007070974	37.4592964	0.086530975
93.34689115	×ÔÉí³µÁ¾	Road 1	51.8243774	43.14014511	0.025347782	1.442674398	0.607843161	0	68.5871	981.5146	655.7919	0.3266	4.1313	574	2.251105264	0.005200053	37.49681957	0.086617653
93.36439237	×ÔÉí³µÁ¾	Road 1	52.03442895	43.207584	0.025347782	1.442141056	0.607843161	0	68.7549	981.5195	655.7919	0.3257	4.1351	575	2.073784375	0.004790442	37.53311333	0.086701492
93.38032033	×ÔÉí³µÁ¾	Road 1	52.22604576	43.30876808	0.025308302	1.442095041	0.607843161	0	69.0072	981.5273	655.7919	0.3225	4.1413	576	3.011679355	0.006956979	37.58108325	0.086812302
93.39696198	×ÔÉí³µÁ¾	Road 1	52.42656004	43.37619324	0.025190106	1.441909194	0.607843161	0	69.1757	981.5322	655.792	0.3217	4.1441	577	2.154953136	0.004977942	37.61694523	0.086895143
93.41412378	×ÔÉí³µÁ¾	Road 1	52.63366288	43.44361153	0.025033087	1.441823006	0.607843161	0	69.3445	981.5371	655.792	0.3199	4.1479	578	2.111621328	0.004877845	37.65318443	0.086978856
93.43022072	×ÔÉí³µÁ¾	Road 1	52.82838918	43.54954376	0.024806567	1.441492438	0.607843161	0	69.6102	981.5439	655.792	0.3188	4.1519	579	3.112451197	0.007189762	37.70328539	0.087094589
93.44692542	×ÔÉí³µÁ¾	Road 1	53.03078028	43.61695175	0.024488654	1.44150424	0.607843161	0	69.7796	981.5488	655.7921	0.317	4.1557	580	2.159109261	0.004987542	37.73935266	0.087177905
93.46374485	×ÔÉí³µÁ¾	Road 1	53.23487628	43.68433571	0.024135217	1.441349268	0.607843161	0	69.9493	981.5527	655.7921	0.3162	4.1585	581	2.151060983	0.004968951	37.77553228	0.08726148
93.48022631	×ÔÉí³µÁ¾	Road 1	53.435356	43.79022331	0.023686897	1.441792607	0.607843161	0	70.2166	981.5605	655.7921	0.3143	4.1635	582	3.068956476	0.007089289	37.82611317	0.087378321
93.49688299	×ÔÉí³µÁ¾	Road 1	53.63827866	43.8575798	0.023080498	1.441078782	0.607843161	0	70.3869	981.5645	655.7921	0.3135	4.1663	583	2.172607892	0.005018724	37.8623016	0.087461917
93.51383145	×ÔÉí³µÁ¾	Road 1	53.84507312	43.92494659	0.022477245	1.44152832	0.607843161	0	70.5576	981.5684	655.7921	0.3136	4.1681	584	2.149310239	0.004964907	37.89872909	0.087546064
93.53020991	×ÔÉí³µÁ¾	Road 1	54.04528502	44.00674667	0.021805897	1.44130826	0.607843161	0	70.7407	981.5732	655.7922	0.3121	4.1716	585	2.539893923	0.005867155	37.94032865	0.087642159
93.54700881	×ÔÉí³µÁ¾	Road 1	54.25108539	44.10296288	0.021050181	1.441719294	0.607843161	0	71.0098	981.5801	655.7922	0.3111	4.1755	586	2.823613529	0.006522547	37.98776226	0.087751731
93.56370838	×ÔÉí³µÁ¾	Road 1	54.45595893	44.16550598	0.020359879	1.441883683	0.607843161	0	71.1692	981.584	655.7922	0.3101	4.1785	587	2.071952454	0.00478621	38.02236296	0.087831658
93.5802155	×ÔÉí³µÁ¾	Road 1	54.65895677	44.27132492	0.01969151	1.440822482	0.607843161	0	71.4394	981.5898	655.7922	0.3102	4.1815	588	3.094006063	0.007147154	38.0734361	0.087949637
93.59687914	×ÔÉí³µÁ¾	Road 1	54.86419105	44.33865051	0.01894669	1.442044258	0.607843161	0	71.6116	981.5938	655.7922	0.3094	4.1842	589	2.191804761	0.005063069	38.10995955	0.088034007
93.61366301	×ÔÉí³µÁ¾	Road 1	55.07124245	44.41078949	0.018271657	1.441341639	0.607843161	0	71.7965	981.5977	655.7922	0.3089	4.1858	590	2.293679994	0.005298401	38.14845639	0.088122934
93.63023575	×ÔÉí³µÁ¾	Road 1	55.27613194	44.50696106	0.017650062	1.442008615	0.615686297	0	72.0434	981.6035	655.7922	0.3085	4.1891	591	2.875749918	0.006642982	38.19611543	0.088233027
93.64704125	×ÔÉí³µÁ¾	Road 1	55.48423628	44.57919273	0.017018488	1.445561171	0.623529434	0	72.229	981.6074	655.7922	0.308	4.1917	592	2.301237382	0.005315858	38.23478888	0.088322362
93.66414549	×ÔÉí³µÁ¾	Road 1	55.69649965	44.67594109	0.016544418	1.454336882	0.623529434	0	72.4769	981.6123	655.7923	0.3086	4.194	593	2.828983209	0.006534951	38.28317649	0.088434138
93.68025527	×ÔÉí³µÁ¾	Road 1	55.89672654	44.74405975	0.016149327	1.461193442	0.623529434	0	72.6507	981.6162	655.7923	0.3078	4.1958	594	2.281792199	0.00527094	38.31993565	0.088519051
93.696953	×ÔÉí³µÁ¾	Road 1	56.10457851	44.81249771	0.015800897	1.466664195	0.623529434	0	72.8249	981.6201	655.7923	0.3071	4.1975	595	2.234602932	0.005161933	38.35724846	0.088605244
93.71368886	×ÔÉí³µÁ¾	Road 1	56.31340747	44.92057915	0.015605696	1.476088285	0.631372571	0	73.099	981.625	655.7923	0.3082	4.1994	596	3.153408142	0.007284373	38.41002343	0.088727154
93.73025573	×ÔÉí³µÁ¾	Road 1	56.52044622	44.98975525	0.015485938	1.481828094	0.631372571	0	73.2738	981.6289	655.7923	0.3074	4.2021	597	2.27213457	0.005248631	38.4476656	0.088814108
93.74688125	×ÔÉí³µÁ¾	Road 1	56.72853864	45.05920258	0.01546888	1.4869802	0.631372571	0	73.4489	981.6318	655.7923	0.3077	4.2029	598	2.275792112	0.00525708	38.48550183	0.088901509
93.7641893	×ÔÉí³µÁ¾	Road 1	56.94553304	45.13390617	0.01546888	1.492989421	0.631372571	0	73.6368	981.6357	655.7923	0.3082	4.2044	599	2.333133717	0.005389539	38.52588382	0.088994792
93.78027745	×ÔÉí³µÁ¾	Road 1	57.14759061	45.21385574	0.01548025	1.496768594	0.631372571	0	73.8375	981.6396	655.7923	0.3079	4.2056	600	2.591702336	0.005986832	38.56757951	0.089091109
93.79687328	×ÔÉí³µÁ¾	Road 1	57.35646301	45.30901108	0.015485938	1.499186993	0.631372571	0	74.0386	981.6436	655.7923	0.3077	4.2079	601	2.89512569	0.00668774	38.61562652	0.089202097
93.81420442	×ÔÉí³µÁ¾	Road 1	57.57502474	45.39933243	0.015485938	1.501608014	0.631372571	0	74.3031	981.6484	655.7923	0.3086	4.2089	602	2.69575385	0.006227191	38.66234701	0.089310022
93.83023612	×ÔÉí³µÁ¾	Road 1	57.77766889	45.50477715	0.015485938	1.503111362	0.631372571	0	74.5682	981.6533	655.7923	0.3085	4.211	603	3.23744587	0.0074785	38.71424877	0.089429915
93.84690856	×ÔÉí³µÁ¾	Road 1	57.98873786	45.57511024	0.015457515	1.503723741	0.631372571	0	74.7453	981.6563	655.7924	0.3088	4.2116	604	2.314694853	0.005346945	38.75284039	0.089519061
93.86370453	×ÔÉí³µÁ¾	Road 1	58.20169887	45.64545364	0.01540644	1.503123045	0.631372571	0	74.9227	981.6592	655.7923	0.3101	4.2123	605	2.305818653	0.005326441	38.79156885	0.089608524
93.88031942	×ÔÉí³µÁ¾	Road 1	58.41285077	45.75093956	0.015293345	1.502936959	0.631372571	0	75.1892	981.6631	655.7923	0.3111	4.2134	606	3.163156662	0.007306892	38.84412435	0.089729927
93.8969519	×ÔÉí³µÁ¾	Road 1	58.62455113	45.82125206	0.015068818	1.503246665	0.631372571	0	75.3673	981.666	655.7923	0.3114	4.214	607	2.3291028	0.005380227	38.88286312	0.089819414
93.91368006	×ÔÉí³µÁ¾	Road 1	58.83781926	45.89658394	0.01480782	1.502367854	0.631372571	0	75.5583	981.6699	655.7923	0.3109	4.2155	608	2.441682955	0.005640288	38.92370797	0.089913765
93.93021027	×ÔÉí³µÁ¾	Road 1	59.04904791	46.00200806	0.014528038	1.502453685	0.631372571	0	75.8264	981.6738	655.7923	0.3129	4.2155	609	3.190315982	0.00736963	38.97644458	0.090035587
93.94690214	×ÔÉí³µÁ¾	Road 1	59.26264483	46.06728058	0.01422491	1.502414584	0.631372571	0	75.9926	981.6768	655.7923	0.313	4.2164	610	2.213991859	0.005114321	39.01340024	0.090120955
93.96376556	×ÔÉí³µÁ¾	Road 1	59.47893066	46.1726738	0.013989719	1.501689196	0.631372571	0	76.2616	981.6807	655.7922	0.314	4.2174	611	3.150094993	0.007276719	39.0665216	0.090243665
93.98023236	×ÔÉí³µÁ¾	Road 1	59.69045093	46.24291763	0.013778172	1.50206542	0.631372571	0	76.4413	981.6826	655.7922	0.3163	4.216	612	2.363108655	0.005458781	39.10543444	0.090333554
93.996907	×ÔÉí³µÁ¾	Road 1	59.90498951	46.31817741	0.01353754	1.501935959	0.631372571	0	76.6341	981.6855	655.7922	0.3168	4.2174	613	2.465422093	0.005695125	39.14654447	0.090428518
94.01373229	×ÔÉí³µÁ¾	Road 1	60.12195878	46.42351913	0.013315151	1.501389742	0.631372571	0	76.9046	981.6895	655.7922	0.3175	4.2171	614	3.170043799	0.007322801	39.19988139	0.090551726
94.03024858	×ÔÉí³µÁ¾	Road 1	60.33526529	46.49370804	0.013054562	1.500928044	0.631372571	0	77.0853	981.6924	655.7922	0.3169	4.2167	615	2.367838817	0.005469708	39.23898929	0.090642065
94.04695108	×ÔÉí³µÁ¾	Road 1	60.55134888	46.57392883	0.012762363	1.501244307	0.631372571	0	77.2921	981.6953	655.7922	0.3167	4.2149	616	2.593708506	0.005991467	39.2823107	0.090742138
94.06377087	×ÔÉí³µÁ¾	Road 1	60.7694184	46.67418594	0.012528805	1.500529528	0.631372571	0	77.5511	981.6982	655.7922	0.3175	4.2131	617	3.064714814	0.007079491	39.33385858	0.090861213
94.08084872	×ÔÉí³µÁ¾	Road 1	60.9911664	46.74433708	0.012337179	1.500433087	0.631372571	0	77.7327	981.7012	655.7922	0.3169	4.2128	618	2.321693045	0.005363111	39.37350811	0.090952804
94.09688959	×ÔÉí³µÁ¾	Road 1	61.19976216	46.81448135	0.012142679	1.500764012	0.631372571	0	77.9147	981.7031	655.7922	0.3173	4.2114	619	2.431908919	0.00561771	39.41251803	0.091042917
94.11417234	×ÔÉí³µÁ¾	Road 1	61.42501262	46.91969604	0.011955021	1.500029325	0.631372571	0	78.188	981.7061	655.7921	0.3184	4.2084	620	3.130654537	0.007231812	39.46662436	0.091167902
94.13020074	×ÔÉí³µÁ¾	Road 1	61.63424913	46.9947979	0.011717275	1.499282718	0.631372571	0	78.3837	981.709	655.7921	0.318	4.2078	621	2.566926543	0.0059296	39.50776809	0.091262944
94.1469179	×ÔÉí³µÁ¾	Road 1	61.85280232	47.06490097	0.01133423	1.499645114	0.631372571	0	78.5666	981.7109	655.7921	0.3184	4.2064	622	2.370419712	0.00547567	39.54739478	0.091354482
94.16395433	×ÔÉí³µÁ¾	Road 1	62.07588487	47.13999252	0.010896506	1.499566555	0.631372571	0	78.7629	981.7139	655.7921	0.3181	4.2058	623	2.460836632	0.005684533	39.58931865	0.091451326
94.1802199	×ÔÉí³µÁ¾	Road 1	62.28939337	47.25508804	0.010426443	1.498890042	0.631372571	0	79.0644	981.7168	655.7921	0.3187	4.2023	624	3.553708303	0.008209066	39.64712171	0.091584851
94.19694036	×ÔÉí³µÁ¾	Road 1	62.50919844	47.32515335	0.009885515	1.499467015	0.631372571	0	79.2483	981.7188	655.792	0.3201	4.2009	625	2.380614916	0.00549922	39.68692669	0.091676801
94.21368611	×ÔÉí³µÁ¾	Road 1	62.72968513	47.40020714	0.00941252	1.499024868	0.631372571	0	79.4456	981.7207	655.792	0.3208	4.1993	626	2.503166396	0.005782314	39.72884409	0.09177363
94.23024381	×ÔÉí³µÁ¾	Road 1	62.94817902	47.50524673	0.00892725	1.498287559	0.631372571	0	79.7224	981.7246	655.792	0.3209	4.1982	627	3.271004392	0.00755602	39.78300442	0.09189874
94.24696354	×ÔÉí³µÁ¾	Road 1	63.16918903	47.58666916	0.008405852	2.077538967	0.623529434	0	79.9205	981.7266	655.7919	0.3216	4.1955	628	2.671092811	0.006170224	39.82766436	0.092001905
94.26365211	×ÔÉí³µÁ¾	Road 1	63.39060341	47.7627388	0.007952486	4.22961998	0.615686297	0	80.1192	981.7285	655.7919	0.3223	4.1939	629	5.018255579	0.01159217	39.91141186	0.092195361
94.28023401	×ÔÉí³µÁ¾	Road 1	63.6119983	48.0657589	0.007501679	4.33023119	0.615686297	0	80.3854	981.7314	655.7919	0.3232	4.192	630	8.240689655	0.019035993	40.04805816	0.092511014
94.29948994	×ÔÉí³µÁ¾	Road 1	63.87023449	48.27865334	0.007007718	4.338875294	0.615686297	0	80.5727	981.7334	655.7919	0.3237	4.1906	631	5.27816631	0.012192564	40.14969415	0.092745793
94.33027002	×ÔÉí³µÁ¾	Road 1	64.28657404	48.69454765	0.006596928	3.600260019	0.615686297	0	80.9499	981.7363	655.7918	0.3266	4.1858	632	6.340449119	0.014646437	40.34485372	0.093196612
94.34688821	×ÔÉí³µÁ¾	Road 1	64.51207469	48.85022736	0.006110254	1.081842899	0.615686297	0	81.2617	981.7402	655.7918	0.3274	4.1842	633	4.628475108	0.010691777	40.4217706	0.09337429
94.3640786	×ÔÉí³µÁ¾	Road 1	64.74564759	48.91469994	0.005413354	1.860565305	0.615686297	0	81.4517	981.7412	655.7917	0.3289	4.1817	634	2.264813923	0.00523172	40.46070362	0.093464225
94.380313	×ÔÉí³µÁ¾	Road 1	64.96708387	49.10377464	0.005054639	2.978839397	0.615686297	0	81.7376	981.7441	655.7917	0.3302	4.1795	635	5.614655878	0.012969855	40.55185422	0.093674783
94.39692129	×ÔÉí³µÁ¾	Road 1	65.19424795	49.23990211	0.004665964	2.548229933	0.615686297	0	81.9288	981.7461	655.7917	0.3317	4.178	636	4.165951223	0.009623347	40.62104355	0.093834611
94.41365422	×ÔÉí³µÁ¾	Road 1	65.42361225	49.346521	0.004356088	1.696267724	0.615686297	0	82.1342	981.748	655.7917	0.3325	4.1762	637	3.398135219	0.007849692	40.67790429	0.093965959
94.43028927	×ÔÉí³µÁ¾	Road 1	65.65209881	49.44689484	0.00408593	1.432651162	0.615686297	0	82.4224	981.751	655.7916	0.3339	4.1729	638	3.260359008	0.007531429	40.73214052	0.094091245
94.446987	×ÔÉí³µÁ¾	Road 1	65.8817917	49.52135811	0.003818226	1.723022699	0.615686297	0	82.6148	981.7529	655.7916	0.3354	4.1714	639	2.592222581	0.005988034	40.77542476	0.094191231
94.46365651	×ÔÉí³µÁ¾	Road 1	66.11148881	49.60612106	0.003611822	1.800224304	0.615686297	0	82.8076	981.7549	655.7916	0.337	4.1698	640	2.86383808	0.006615466	40.82316353	0.094301508
94.4802725	×ÔÉí³µÁ¾	Road 1	66.34086628	49.69664154	0.003442132	1.543614626	0.615686297	0	83.0283	981.7568	655.7916	0.338	4.1678	641	3.024101248	0.006985674	40.87341197	0.094417582
94.49685623	×ÔÉí³µÁ¾	Road 1	66.57011859	49.7661335	0.003296057	1.298077226	0.615686297	0	83.2355	981.7588	655.7915	0.3399	4.166	642	2.487995828	0.00574727	40.91467223	0.094512893
94.51420607	×ÔÉí³µÁ¾	Road 1	66.81036386	49.84963646	0.00320167	1.294773102	0.615686297	0	83.5122	981.7607	655.7915	0.342	4.1629	643	2.759375322	0.006374157	40.96254694	0.094623483
94.53667962	×ÔÉí³µÁ¾	Road 1	67.12212736	49.94085045	0.003142375	1.300472379	0.615686297	0	83.8033	981.7637	655.7914	0.3443	4.1605	644	2.438524509	0.005632992	41.01734926	0.094750077
94.5636215	×ÔÉí³µÁ¾	Road 1	67.49647787	50.02108154	0.003105203	1.176033854	0.615686297	0	84.0393	981.7656	655.7914	0.3457	4.1582	645	1.97532402	0.004562998	41.0705682	0.094873013
94.58019387	×ÔÉí³µÁ¾	Road 1	67.72723658	50.12749443	0.003087698	1.070210814	0.615686297	0	84.4982	981.7695	655.7913	0.349	4.1528	646	3.468553304	0.008012358	41.12805034	0.095005796
94.59687584	×ÔÉí³µÁ¾	Road 1	67.95974245	50.17519569	0.003045185	1.04484427	0.615686297	0	84.6933	981.7715	655.7913	0.3506	4.1512	647	1.929556353	0.004457275	41.16023915	0.095080152
94.61360803	×ÔÉí³µÁ¾	Road 1	68.19317743	50.22450714	0.002985946	1.007616758	0.615686297	0	84.9024	981.7734	655.7913	0.3524	4.1494	648	1.969163664	0.004548768	41.19318756	0.095156263
94.63024125	×ÔÉí³µÁ¾	Road 1	68.42552348	50.28766823	0.002893885	0.978907466	0.615686297	0	85.1816	981.7754	655.7913	0.3554	4.1463	649	2.340332677	0.005406168	41.23211483	0.095246185
94.64696574	×ÔÉí³µÁ¾	Road 1	68.65936138	50.33435326	0.002794643	0.973555982	0.615686297	0	85.3913	981.7773	655.7912	0.3563	4.1444	650	1.905159873	0.004400919	41.26397766	0.095319788
94.6636785	×ÔÉí³µÁ¾	Road 1	68.89331971	50.39562263	0.002720827	0.948990643	0.615686297	0	85.6711	981.7793	655.7911	0.3594	4.1413	651	2.287613712	0.005284388	41.30221	0.095408105
94.68034324	×ÔÉí³µÁ¾	Road 1	69.12679829	50.43719559	0.002674697	0.926782489	0.615686297	0	85.8671	981.7813	655.7911	0.361	4.1397	652	1.77920834	0.004109971	41.33186005	0.095476597
94.69694934	×ÔÉí³µÁ¾	Road 1	69.35965664	50.48087311	0.002637822	0.917695284	0.615686297	0	86.0774	981.7832	655.7911	0.3629	4.1378	653	1.839573669	0.004249415	41.36240818	0.095547163
94.71411113	×ÔÉí³µÁ¾	Road 1	69.60050133	50.52158089	0.002634328	0.920983553	0.615686297	0	86.2738	981.7842	655.7911	0.3645	4.1352	654	1.728158623	0.003992046	41.39206648	0.095615674
94.73025133	×ÔÉí³µÁ¾	Road 1	69.82730882	50.58840179	0.002634328	0.917391896	0.615686297	0	86.5967	981.7871	655.791	0.3674	4.1323	655	2.502223531	0.005780136	41.43245287	0.095708966
94.74687465	×ÔÉí³µÁ¾	Road 1	70.06108956	50.62830963	0.002634328	0.89689523	0.615686297	0	86.7936	981.7891	655.791	0.3691	4.1307	656	1.743742707	0.004028046	41.46143966	0.095775926
94.76365119	×ÔÉí³µÁ¾	Road 1	70.29722136	50.67042503	0.002646571	0.889707804	0.615686297	0	87.0046	981.79	655.791	0.3719	4.1278	657	1.792920771	0.004141647	41.49151867	0.095845408
94.7802188	×ÔÉí³µÁ¾	Road 1	70.53068379	50.72940445	0.002665887	0.894658148	0.615686297	0	87.3003	981.793	655.7909	0.3734	4.1254	658	2.254333565	0.005207511	41.52886758	0.095931684
94.79692533	×ÔÉí³µÁ¾	Road 1	70.76630014	50.77169838	0.002688835	0.893431067	0.615686297	0	87.5118	981.7949	655.7909	0.3753	4.1235	659	1.805204393	0.004170022	41.55902628	0.096001351
94.81398448	×ÔÉí³µÁ¾	Road 1	71.00708841	50.81363525	0.0027048	0.883878827	0.615686297	0	87.7234	981.7959	655.7908	0.3781	4.1206	660	1.774294417	0.00409862	41.58929425	0.09607127
94.83017307	×ÔÉí³µÁ¾	Road 1	71.23576265	50.85232773	0.002711915	0.876785755	0.615686297	0	87.9211	981.7979	655.7908	0.3798	4.118	661	1.745486426	0.004032074	41.61755121	0.096136543
94.8468851	×ÔÉí³µÁ¾	Road 1	71.47207397	50.90469818	0.002711915	0.878389597	0.615686297	0	88.1331	981.7998	655.7908	0.3817	4.1161	662	2.073783886	0.004790441	41.65220834	0.096216601
94.86390357	×ÔÉí³µÁ¾	Road 1	71.7129411	50.95180206	0.002711915	0.882269382	0.615686297	0	88.4301	981.8018	655.7907	0.3841	4.1127	663	1.914462041	0.004422407	41.68478955	0.096291864
94.88026443	×ÔÉí³µÁ¾	Road 1	71.94476453	51.00978584	0.002711915	0.877446473	0.615686297	0	88.7275	981.8037	655.7906	0.3876	4.1092	664	2.258163072	0.005216357	41.72173506	0.096377208
94.8968522	×ÔÉí³µÁ¾	Road 1	72.17999217	51.05085068	0.0027048	0.871135771	0.615686297	0	88.9402	981.8057	655.7906	0.3895	4.1073	665	1.788812899	0.004132158	41.75140747	0.096445751
94.91372295	×ÔÉí³µÁ¾	Road 1	72.4194121	51.08912773	0.002688835	0.872538447	0.615686297	0	89.1388	981.8066	655.7906	0.3921	4.1047	666	1.698703151	0.003924004	41.78006586	0.096511952
94.93031218	×ÔÉí³µÁ¾	Road 1	72.65511514	51.14950104	0.002665887	0.875104129	0.615686297	0	89.4512	981.8096	655.7905	0.3939	4.1019	667	2.30557283	0.005325873	41.81831354	0.096600304
94.94684496	×ÔÉí³µÁ¾	Road 1	72.89019244	51.18789482	0.002632582	0.872126758	0.615686297	0	89.6501	981.8105	655.7905	0.3965	4.0993	668	1.725038015	0.003984838	41.84683322	0.096666185
94.96359658	×ÔÉí³µÁ¾	Road 1	73.12855913	51.22610664	0.00259091	0.869184315	0.615686297	0	89.8493	981.8125	655.7905	0.3982	4.0976	669	1.707871995	0.003945184	41.87544283	0.096732273
94.98020377	×ÔÉí³µÁ¾	Road 1	73.36513451	51.28328362	0.002544558	0.869286537	0.615686297	0	90.1483	981.8145	655.7904	0.4017	4.0941	670	2.223876125	0.005137154	41.91237517	0.096817587
94.99682013	×ÔÉí³µÁ¾	Road 1	73.6020168	51.321492	0.002485299	0.87002784	0.615686297	0	90.248	981.8154	655.7904	0.4025	4.0933	671	1.718634977	0.003970047	41.94093263	0.096883554
95.01407246	×ÔÉí³µÁ¾	Road 1	73.84817491	51.36518326	0.002433588	0.869707406	0.615686297	0	90.576	981.8174	655.7903	0.4056	4.0893	672	1.823190015	0.004211569	41.9723869	0.096956214
95.03020789	×ÔÉí³µÁ¾	Road 1	74.07856794	51.40331955	0.002371184	0.867581189	0.615686297	0	90.7758	981.8184	655.7903	0.4082	4.0867	673	1.749348033	0.004040994	42.0006134	0.097021417
95.04760281	×ÔÉí³µÁ¾	Road 1	74.32723355	51.46307487	0.002287532	0.866999626	0.615686297	0	91.0901	981.8213	655.7903	0.411	4.0839	674	2.227168624	0.00514476	42.03935482	0.09711091
95.06361545	×ÔÉí³µÁ¾	Road 1	74.55630828	51.5011322	0.002208974	0.867990375	0.615686297	0	91.2903	981.8223	655.7902	0.4137	4.0812	675	1.757977448	0.004060928	42.06750468	0.097175936
95.08018086	×ÔÉí³µÁ¾	Road 1	74.79355381	51.55828514	0.002123149	0.868061483	0.615686297	0	91.5909	981.8242	655.7902	0.4172	4.0777	676	2.23741916	0.005168438	42.10456844	0.097261553
95.09689105	×ÔÉí³µÁ¾	Road 1	75.03304951	51.59631844	0.002036633	0.865722001	0.615686297	0	91.7915	981.8262	655.7902	0.4179	4.076	677	1.715809402	0.00396352	42.13323995	0.097327784
95.1135547	×ÔÉí³µÁ¾	Road 1	75.2720537	51.63427277	0.001951069	0.865217626	0.615686297	0	91.9922	981.8271	655.7901	0.4205	4.0733	678	1.717574458	0.003967597	42.16186099	0.097393899
95.13016702	×ÔÉí³µÁ¾	Road 1	75.51050953	51.67494621	0.001862388	0.866381824	0.615686297	0	92.2075	981.8291	655.79	0.4225	4.0714	679	1.794872222	0.004146155	42.19167799	0.097462776
95.14684753	×ÔÉí³µÁ¾	Road 1	75.75013268	51.71566429	0.001759034	0.866707385	0.615686297	0	92.4228	981.8301	655.79	0.4254	4.0685	680	1.792774524	0.004141309	42.22158238	0.097531855
95.18027268	×ÔÉí³µÁ¾	Road 1	76.23118141	51.81054153	0.001671154	0.864196479	0.615686297	0	92.9261	981.834	655.7899	0.4307	4.0622	681	1.972731754	0.00455701	42.28752124	0.097684174
95.19684798	×ÔÉí³µÁ¾	Road 1	76.47000442	51.8701149	0.00158625	0.864688277	0.615686297	0	93.2429	981.8359	655.7899	0.4335	4.0584	682	2.313603097	0.005344423	42.32586991	0.097772759
95.21359227	×ÔÉí³µÁ¾	Road 1	76.71143846	51.90801086	0.001422851	0.864632368	0.607843161	0	93.4447	981.8369	655.7899	0.4362	4.0557	683	1.718610203	0.00396999	42.35464681	0.097839234
95.23081198	×ÔÉí³µÁ¾	Road 1	76.95999906	51.96476898	0.001356727	0.861226797	0.607843161	0	93.7477	981.8389	655.7898	0.4397	4.0522	684	2.183575059	0.005044058	42.39224734	0.097926091
95.24690489	×ÔÉí³µÁ¾	Road 1	77.19247509	52.00510597	0.00128185	0.858297586	0.607843161	0	93.9643	981.8398	655.7897	0.4427	4.0492	685	1.83053845	0.004228544	42.42170604	0.097994141
95.26379946	×ÔÉí³µÁ¾	Road 1	77.43670786	52.04262772	0.001219159	0.85658741	0.607843161	0	94.1666	981.8418	655.7897	0.4444	4.0475	686	1.703283756	0.003934585	42.45048229	0.098060614
95.28038356	×ÔÉí³µÁ¾	Road 1	77.67671127	52.09883308	0.001158546	0.855653286	0.607843161	0	94.4703	981.8438	655.7897	0.447	4.0439	687	2.230292991	0.005151977	42.48746969	0.098146055
95.29683644	×ÔÉí³µÁ¾	Road 1	77.91498663	52.13626213	0.001099001	0.854767501	0.607843161	0	94.673	981.8447	655.7896	0.4497	4.0412	688	1.730127067	0.003996594	42.51593525	0.09821181
95.31410526	×ÔÉí³µÁ¾	Road 1	78.16525808	52.17362251	0.001047187	0.853455722	0.607843161	0	94.8758	981.8467	655.7896	0.4515	4.0395	689	1.680912377	0.003882908	42.54496263	0.098278864
95.33015602	×ÔÉí³µÁ¾	Road 1	78.39813765	52.23219337	0.001003437	0.852080047	0.607843161	0	95.1949	981.8486	655.7896	0.4553	4.0357	690	2.352492522	0.005434258	42.58272193	0.098366088
95.34690874	×ÔÉí³µÁ¾	Road 1	78.64137515	52.26943703	0.0009636	0.851206899	0.600000024	0	95.3981	981.8496	655.7895	0.458	4.0329	691	1.710400036	0.003951024	42.61137577	0.098432278
95.3641904	×ÔÉí³µÁ¾	Road 1	78.89247089	52.30659828	0.000927442	0.84824717	0.600000024	0	95.6014	981.8506	655.7894	0.4607	4.0302	692	1.678502259	0.00387734	42.64038307	0.098499285
95.38018507	×ÔÉí³µÁ¾	Road 1	79.12511363	52.36203461	0.000896448	0.84407711	0.600000024	0	95.9067	981.8525	655.7894	0.4642	4.0266	693	2.274799863	0.005254788	42.67676776	0.098583334
95.39685128	×ÔÉí³µÁ¾	Road 1	79.36769418	52.39883881	0.00086449	0.842373431	0.592156887	0	96.1104	981.8545	655.7894	0.466	4.0249	694	1.707184391	0.003943596	42.70522005	0.098649058
95.41365971	×ÔÉí³µÁ¾	Road 1	79.61251623	52.43555031	0.000837361	0.840053618	0.592156887	0	96.3142	981.8555	655.7893	0.4687	4.0221	695	1.697208899	0.003920553	42.73374748	0.098714957
95.4303021	×ÔÉí³µÁ¾	Road 1	79.85518467	52.49286804	0.000800501	0.834427357	0.592156887	0	96.6348	981.8574	655.7892	0.4715	4.0183	696	2.269805475	0.005243251	42.77152245	0.098802217
95.44685357	×ÔÉí³µÁ¾	Road 1	80.09669439	52.52915039	0.000757868	0.831487536	0.592156887	0	96.8391	981.8584	655.7892	0.4742	4.0155	697	1.703328592	0.003934689	42.79971505	0.098867342
95.46363781	×ÔÉí³µÁ¾	Road 1	80.34176912	52.56532631	0.000712386	0.830017686	0.592156887	0	97.0434	981.8604	655.7892	0.476	4.0138	698	1.687611802	0.003898383	42.82804033	0.098932773
95.48015373	×ÔÉí³µÁ¾	Road 1	80.58317423	52.61943398	0.000661784	0.827852368	0.592156887	0	97.3502	981.8623	655.7891	0.4795	4.0102	699	2.198252553	0.005077963	42.86434649	0.09901664
95.49694384	×ÔÉí³µÁ¾	Road 1	80.82876662	52.65795822	0.00060312	0.825886011	0.592156887	0	97.5695	981.8633	655.7891	0.4825	4.0071	700	1.753317683	0.004050164	42.89378488	0.099084643
95.51359832	×ÔÉí³µÁ¾	Road 1	81.0725412	52.69384232	0.000548642	0.824600041	0.592156887	0	97.7744	981.8643	655.7891	0.4852	4.0044	701	1.690675948	0.003905461	42.92194221	0.099149687
95.53019268	×ÔÉí³µÁ¾	Road 1	81.31568345	52.74755516	0.000492963	0.82283783	0.592156887	0	98.0819	981.8662	655.789	0.4888	4.0008	702	2.184986115	0.005047318	42.95820066	0.099233444
95.54687062	×ÔÉí³µÁ¾	Road 1	81.56023954	52.788414	0.000444909	0.822151244	0.592156887	0	98.3164	981.8682	655.7889	0.4911	3.9985	703	1.827766989	0.004222142	42.98868405	0.09930386
95.5636204	×ÔÉí³µÁ¾	Road 1	81.80601523	52.82411613	0.000398595	0.821011245	0.592156887	0	98.5218	981.8691	655.7889	0.4938	3.9957	704	1.683564383	0.003889034	43.01688339	0.099369001
95.58016051	×ÔÉí³µÁ¾	Road 1	82.04896007	52.87759552	0.000351948	0.819687843	0.592156887	0	98.8301	981.8711	655.7888	0.4975	3.992	705	2.188040579	0.005054374	43.05307382	0.099452601
95.59689893	×ÔÉí³µÁ¾	Road 1	82.29498321	52.91319809	0.000300795	0.819421768	0.592156887	0	99.0358	981.8721	655.7888	0.5002	3.9892	706	1.683841492	0.003889674	43.08125867	0.099517708
95.61363662	×ÔÉí³µÁ¾	Road 1	82.54116097	52.94876976	0.000258553	0.818695724	0.592156887	0	99.2417	981.874	655.7888	0.502	3.9874	707	1.683970472	0.003889972	43.10944444	0.099582817
95.63015767	×ÔÉí³µÁ¾	Road 1	82.78439717	53.00209122	0.000218465	0.818382204	0.592156887	0	99.5507	981.875	655.7887	0.5066	3.9828	708	2.189821258	0.005058487	43.14562259	0.099666388
95.64684441	×ÔÉí³µÁ¾	Road 1	83.03023739	53.03762169	0.000176341	0.817648947	0.592156887	0	99.7569	981.877	655.7887	0.5083	3.9809	709	1.688135876	0.003899594	43.17379207	0.09973146
95.66355754	×ÔÉí³µÁ¾	Road 1	83.27671351	53.09084358	0.000142246	0.816722512	0.592156887	0	100.0664	981.8789	655.7886	0.5119	3.9772	710	2.173246987	0.005020201	43.21011382	0.099815363
95.68013907	×ÔÉí³µÁ¾	Road 1	83.52142395	53.12883568	0.00011307	0.816855729	0.592156887	0	100.2877	981.8799	655.7886	0.515	3.9743	711	1.764838761	0.004076778	43.23937756	0.099882962
95.69685367	×ÔÉí³µÁ¾	Road 1	83.76827438	53.16680374	8.53E-05	0.816539109	0.592156887	0	100.5091	981.8818	655.7886	0.517	3.9725	712	1.756848133	0.004058319	43.26874256	0.099950795
95.71431677	×ÔÉí³µÁ¾	Road 1	84.02636328	53.20475464	6.47E-05	0.815639019	0.592156887	0	100.7308	981.8828	655.7885	0.52	3.9696	713	1.712685324	0.003956303	43.29865136	0.100019885
95.7306912	×ÔÉí³µÁ¾	Road 1	84.26860409	53.2578495	4.87E-05	0.815515637	0.592156887	0	101.0413	981.8848	655.7885	0.5237	3.9659	714	2.205876018	0.005095574	43.33477132	0.100103322
95.74835444	×ÔÉí³µÁ¾	Road 1	84.530085	53.29323578	3.64E-05	0.81543225	0.592156887	0	101.2485	981.8857	655.7884	0.5264	3.9631	715	1.636873365	0.003781177	43.36368381	0.10017011
95.76363433	×ÔÉí³µÁ¾	Road 1	84.75643367	53.32859459	2.85E-05	0.814512253	0.592156887	0	101.4558	981.8877	655.7883	0.5272	3.9613	716	1.780898935	0.004113877	43.39089575	0.100232969
95.78013816	×ÔÉí³µÁ¾	Road 1	85.00116768	53.38413734	2.27E-05	0.813982189	0.592156887	0	101.7819	981.8896	655.7883	0.5312	3.9573	717	2.267032642	0.005236845	43.42831046	0.100319397
95.79679703	×ÔÉí³µÁ¾	Road 1	85.2483644	53.41945839	1.93E-05	0.814542174	0.592156887	0	101.9895	981.8906	655.7883	0.5339	3.9545	718	1.693975398	0.003913083	43.45653019	0.100384585
95.81357797	×ÔÉí³µÁ¾	Road 1	85.49753708	53.45478973	1.72E-05	0.814638913	0.600000024	0	102.1973	981.8916	655.7882	0.5367	3.9517	719	1.688058757	0.003899416	43.4848574	0.100450021
95.83019066	×ÔÉí³µÁ¾	Road 1	85.74446802	53.51037712	1.55E-05	0.816535592	0.600000024	0	102.5242	981.8936	655.7881	0.5407	3.9477	720	2.262733628	0.005226915	43.5224475	0.100536854
95.8468664	×ÔÉí³µÁ¾	Road 1	85.99250056	53.54588356	1.38E-05	0.818892241	0.600000024	0	102.7323	981.8955	655.7881	0.5425	3.9459	721	1.701424661	0.003930291	43.55082001	0.100602394
95.86364771	×ÔÉí³µÁ¾	Road 1	86.24226923	53.58147583	1.23E-05	0.820668995	0.600000024	0	102.9406	981.8965	655.7881	0.5453	3.9431	722	1.69852288	0.003923588	43.57932345	0.100668237
95.88012807	×ÔÉí³µÁ¾	Road 1	86.48780346	53.63493118	1.08E-05	0.821365654	0.607843161	0	103.2534	981.8984	655.788	0.5491	3.9394	723	2.219848035	0.005127849	43.61590735	0.100752746
95.89688079	×ÔÉí³µÁ¾	Road 1	86.73756154	53.67064705	9.52E-06	0.823495686	0.607843161	0	103.462	981.8994	655.788	0.5519	3.9366	724	1.705948877	0.003940742	43.64448663	0.100818764
95.9137607	×ÔÉí³µÁ¾	Road 1	86.98946844	53.72450409	8.92E-06	0.829075813	0.615686297	0	103.7752	981.9014	655.7879	0.5556	3.9328	725	2.198465072	0.005078454	43.68159652	0.100904488
95.93013916	×ÔÉí³µÁ¾	Road 1	87.2340565	53.76066628	8.45E-06	0.832835853	0.623529434	0	103.9842	981.9033	655.7879	0.5575	3.931	726	1.74358531	0.004027682	43.71015377	0.100970455
95.94680354	×ÔÉí³µÁ¾	Road 1	87.48308266	53.79704475	8.42E-06	0.837625921	0.623529434	0	104.1934	981.9043	655.7878	0.5606	3.9282	727	1.732986902	0.0040032	43.73903291	0.101037166
95.96369078	×ÔÉí³µÁ¾	Road 1	87.73570963	53.85468521	8.42E-06	0.844969809	0.631372571	0	104.5223	981.9063	655.7878	0.5649	3.9241	728	2.30658545	0.005328212	43.77798478	0.101127145
95.98021586	×ÔÉí³µÁ¾	Road 1	87.98308884	53.891716	8.42E-06	0.850976169	0.639215708	0	104.7318	981.9072	655.7877	0.5677	3.9213	729	1.762447966	0.004071255	43.80710938	0.101194423
95.99685861	×ÔÉí³µÁ¾	Road 1	88.23240206	53.92904892	8.42E-06	0.857226312	0.639215708	0	104.9415	981.9092	655.7877	0.5695	3.9194	730	1.764534784	0.004076075	43.83647609	0.10126226
96.01359007	×ÔÉí³µÁ¾	Road 1	88.48331963	53.98832359	8.42E-06	0.867216468	0.647058845	0	105.2712	981.9111	655.7877	0.5735	3.9154	731	2.371908399	0.005479108	43.87616157	0.101353933
96.03011479	×ÔÉí³µÁ¾	Road 1	88.73131185	54.02645988	8.42E-06	0.87359035	0.654901981	0	105.4813	981.9121	655.7876	0.5764	3.9126	732	1.797342024	0.00415186	43.90586214	0.101422542
96.04685284	×ÔÉí³µÁ¾	Road 1	88.98268452	54.06492577	8.45E-06	0.880166709	0.654901981	0	105.6914	981.9131	655.7876	0.5792	3.9097	733	1.793863593	0.004143825	43.93588792	0.101491901
96.06404799	×ÔÉí³µÁ¾	Road 1	89.24110724	54.10373497	8.53E-06	0.887146831	0.662745118	0	105.9018	981.915	655.7875	0.581	3.9079	734	1.775711634	0.004101894	43.96642155	0.101562434
96.08018269	×ÔÉí³µÁ¾	Road 1	89.48380607	54.15134354	8.53E-06	0.895937026	0.662745118	0	106.1574	981.916	655.7875	0.5847	3.9042	735	2.101419813	0.00485428	44.00032733	0.101640756
96.09683167	×ÔÉí³µÁ¾	Road 1	89.73454203	54.21649933	8.53E-06	0.9024508	0.662745118	0	106.5036	981.918	655.7874	0.589	3.8999	736	2.554204391	0.005900212	44.04285223	0.101738989
96.13026709	×ÔÉí³µÁ¾	Road 1	90.23882872	54.29667549	8.53E-06	0.91333735	0.662745118	0	106.9256	981.9209	655.7874	0.5937	3.8951	737	1.846663858	0.004265794	44.10459621	0.101881617
96.14679071	×ÔÉí³µÁ¾	Road 1	90.48833602	54.36014557	8.57E-06	0.917621076	0.662745118	0	107.2576	981.9229	655.7873	0.5977	3.891	738	2.526250274	0.005835638	44.14633901	0.101978043
96.16383374	×ÔÉí³µÁ¾	Road 1	90.74587849	54.40071259	8.57E-06	0.920757473	0.662745118	0	107.469	981.9248	655.7872	0.5996	3.8892	739	1.841735053	0.004254408	44.17772775	0.102050551
96.18014109	×ÔÉí³µÁ¾	Road 1	90.99258056	54.4617897	8.57E-06	0.922431171	0.662745118	0	107.7866	981.9268	655.7872	0.6034	3.8853	740	2.485391193	0.005741254	44.21825789	0.102144176
96.1967842	×ÔÉí³µÁ¾	Road 1	91.2445508	54.50258675	8.57E-06	0.924271226	0.662745118	0	107.9984	981.9277	655.7871	0.6062	3.8825	741	1.878057325	0.004338312	44.24951462	0.102216379
96.21353472	×ÔÉí³µÁ¾	Road 1	91.49833734	54.54348679	8.57E-06	0.926437557	0.662745118	0	108.2105	981.9287	655.7871	0.6091	3.8796	742	1.874732323	0.004330632	44.28091735	0.102288919
96.23020423	×ÔÉí³µÁ¾	Road 1	91.75118098	54.60491753	8.57E-06	0.927487612	0.662745118	0	108.5288	981.9307	655.787	0.6129	3.8758	743	2.462759443	0.005688974	44.32197034	0.102383751
96.24690709	×ÔÉí³µÁ¾	Road 1	92.00472082	54.645924	8.57E-06	0.928177595	0.647058845	0	108.7413	981.9326	655.787	0.6147	3.8739	744	1.883985999	0.004352008	44.3534383	0.102456442
96.26386838	×ÔÉí³µÁ¾	Road 1	92.26237639	54.6868927	8.57E-06	0.92499125	0.647058845	0	108.9539	981.9336	655.787	0.6176	3.871	745	1.866451178	0.004311502	44.38509571	0.102529571
96.28016546	×ÔÉí³µÁ¾	Road 1	92.51023168	54.75083313	8.57E-06	0.918827415	0.647058845	0	109.2882	981.9355	655.7869	0.6217	3.8668	746	2.581146316	0.005962448	44.42716088	0.102626742
96.29709413	×ÔÉí³µÁ¾	Road 1	92.76788266	54.79130402	8.64E-06	0.915747344	0.639215708	0	109.5013	981.9365	655.7869	0.6246	3.864	747	1.857732074	0.004291361	44.4586098	0.102699389
96.31362544	×ÔÉí³µÁ¾	Road 1	93.01968439	54.83448715	8.76E-06	0.912997365	0.639215708	0	109.7296	981.9385	655.7868	0.6267	3.8618	748	1.96386883	0.004536537	44.49107513	0.102774384
96.33017912	×ÔÉí³µÁ¾	Road 1	93.27201135	54.87464561	8.96E-06	0.909240961	0.639215708	0	109.943	981.9395	655.7867	0.6296	3.8589	749	1.87683087	0.004335479	44.52214358	0.102846152
96.34681234	×ÔÉí³µÁ¾	Road 1	93.5257618	54.92031441	9.32E-06	0.904917121	0.639215708	0	110.187	981.9414	655.7867	0.6321	3.8564	750	2.029750794	0.004688724	44.55590487	0.10292414
96.36404964	×ÔÉí³µÁ¾	Road 1	93.78905424	54.98846397	9.52E-06	0.902800798	0.639215708	0	110.5533	981.9434	655.7866	0.6367	3.8517	751	2.605314485	0.006018276	44.60081347	0.103027879
96.38012899	×ÔÉí³µÁ¾	Road 1	94.03483651	55.02809715	9.98E-06	0.900237024	0.639215708	0	110.7672	981.9443	655.7866	0.6396	3.8488	752	1.899736841	0.004388392	44.63136	0.103098442
96.39682526	×ÔÉí³µÁ¾	Road 1	94.29024516	55.07046661	1.04E-05	0.898297012	0.639215708	0	110.9966	981.9463	655.7866	0.6418	3.8466	753	1.935578764	0.004471187	44.66367694	0.103173094
96.4140446	×ÔÉí³µÁ¾	Road 1	94.55395185	55.13242607	1.08E-05	0.895936966	0.639215708	0	111.3334	981.9482	655.7865	0.6459	3.8424	754	2.442240578	0.005641576	44.70573072	0.103270238
96.4301694	×ÔÉí³µÁ¾	Road 1	94.80107244	55.17177429	1.14E-05	0.894386947	0.639215708	0	111.5478	981.9492	655.7865	0.6488	3.8395	755	1.892183398	0.004370944	44.73624181	0.103340719
96.44679822	×ÔÉí³µÁ¾	Road 1	95.0560988	55.21106758	1.19E-05	0.894146979	0.639215708	0	111.7625	981.9512	655.7864	0.6508	3.8375	756	1.85646519	0.004288435	44.76711263	0.10341203
96.46376024	×ÔÉí³µÁ¾	Road 1	95.31651253	55.26991997	1.27E-05	0.891966879	0.639215708	0	112.0847	981.9531	655.7864	0.6546	3.8336	757	2.386246174	0.005512229	44.80758818	0.103505529
96.48017939	×ÔÉí³µÁ¾	Road 1	95.5687831	55.31188087	1.33E-05	0.891230583	0.639215708	0	112.3151	981.9541	655.7863	0.6578	3.8304	758	1.951330676	0.004507574	44.83962737	0.103579539
96.49681738	×ÔÉí³µÁ¾	Road 1	95.82459688	55.3510334	1.39E-05	0.891146898	0.639215708	0	112.5303	981.9551	655.7863	0.6607	3.8275	759	1.855745627	0.004286772	44.87050324	0.103650862
96.51382961	×ÔÉí³µÁ¾	Road 1	96.08645526	55.41247444	1.47E-05	0.889770508	0.639215708	0	112.8687	981.958	655.7863	0.6639	3.8243	760	2.459515623	0.005681481	44.9123451	0.103747517
96.54681197	×ÔÉí³µÁ¾	Road 1	96.59469376	55.47386055	1.55E-05	0.889850497	0.639215708	0	113.2075	981.96	655.7861	0.6681	3.8201	761	1.623226432	0.003749653	44.96588294	0.10387119
96.56347928	×ÔÉí³µÁ¾	Road 1	96.85178511	55.52959557	1.60E-05	0.888266802	0.639215708	0	113.5159	981.9619	655.7861	0.6717	3.8164	762	2.335814964	0.005395733	45.00481468	0.103961122
96.58016015	×ÔÉí³µÁ¾	Road 1	97.10938247	55.59364929	1.65E-05	0.888120472	0.639215708	0	113.8709	981.9639	655.786	0.6762	3.8119	763	2.576194252	0.005951009	45.04778785	0.10406039
96.59684725	×ÔÉí³µÁ¾	Road 1	97.36725658	55.63259583	1.65E-05	0.887426794	0.639215708	0	114.0871	981.9648	655.786	0.6791	3.809	764	1.854401744	0.004283668	45.07873244	0.104131872
96.61346947	×ÔÉí³µÁ¾	Road 1	97.62430785	55.67153206	1.65E-05	0.887330532	0.639215708	0	114.3036	981.9668	655.7859	0.6811	3.807	765	1.85957335	0.004295614	45.10964268	0.104203275
96.63018407	×ÔÉí³µÁ¾	Road 1	97.88304575	55.72713661	1.65E-05	0.886400461	0.639215708	0	114.5356	981.9678	655.7859	0.6843	3.8038	766	2.334751164	0.005393275	45.1486671	0.104293421
96.64681435	×ÔÉí³µÁ¾	Road 1	98.1406839	55.77157974	1.65E-05	0.886456728	0.639215708	0	114.8608	981.9697	655.7858	0.6883	3.7998	767	2.02131032	0.004669227	45.18228207	0.104371072
96.66404542	×ÔÉí³µÁ¾	Road 1	98.40781556	55.81045761	1.65E-05	0.886190474	0.639215708	0	115.0777	981.9717	655.7858	0.6903	3.7978	768	1.821927479	0.004208652	45.21367583	0.104443591
96.68014604	×ÔÉí³µÁ¾	Road 1	98.65771972	55.87706566	1.63E-05	0.88607049	0.639215708	0	115.45	981.9736	655.7858	0.6951	3.793	769	2.731111725	0.006308868	45.2576484	0.104545168
96.69680161	×ÔÉí³µÁ¾	Road 1	98.91641736	55.91589203	1.59E-05	0.885516763	0.639215708	0	115.6674	981.9746	655.7857	0.698	3.79	770	1.860969198	0.004298839	45.28864392	0.104616767
96.7135525	×ÔÉí³µÁ¾	Road 1	99.17677592	55.95471153	1.53E-05	0.885440409	0.639215708	0	115.8849	981.9766	655.7856	0.7	3.788	771	1.855443845	0.004286075	45.31972424	0.104688563
96.73010984	×ÔÉí³µÁ¾	Road 1	99.43439405	56.01293221	1.43E-05	0.885050416	0.639215708	0	116.2115	981.9785	655.7856	0.704	3.7841	772	2.436882807	0.005629199	45.36007254	0.104781768
96.74710925	×ÔÉí³µÁ¾	Road 1	99.69907346	56.05171051	1.33E-05	0.884136736	0.639215708	0	116.4294	981.9795	655.7855	0.707	3.7811	773	1.840561875	0.004251698	45.391361	0.104854044
96.76347744	×ÔÉí³µÁ¾	Road 1	99.95410126	56.09047852	1.20E-05	0.884256721	0.639215708	0	116.6475	981.9805	655.7855	0.71	3.7781	774	1.883949372	0.004351923	45.42219786	0.104925277
96.78011543	×ÔÉí³µÁ¾	Road 1	100.2136012	56.14861336	1.04E-05	0.884126723	0.639215708	0	116.9748	981.9824	655.7855	0.714	3.7741	775	2.431294933	0.005616291	45.4626497	0.105018721
96.79686081	×ÔÉí³µÁ¾	Road 1	100.4749693	56.19012451	8.92E-06	0.883606672	0.639215708	0	117.2089	981.9844	655.7854	0.7163	3.7718	776	1.940357385	0.004482226	45.49514174	0.105093777
96.81346507	×ÔÉí³µÁ¾	Road 1	100.7343134	56.22885818	7.19E-06	0.882886708	0.639215708	0	117.4275	981.9854	655.7853	0.7193	3.7688	777	1.870497092	0.004320848	45.52619996	0.105165522
96.83009866	×ÔÉí³µÁ¾	Road 1	100.9943837	56.28692093	5.42E-06	0.883140326	0.639215708	0	117.7556	981.9873	655.7853	0.7233	3.7648	778	2.434889977	0.005624596	45.56670091	0.105259079
96.84683451	×ÔÉí³µÁ¾	Road 1	101.2562459	56.32839088	3.98E-06	0.88245666	0.639215708	0	117.9903	981.9893	655.7853	0.7256	3.7625	779	1.943884375	0.004490373	45.59923347	0.105334229
96.86345307	×ÔÉí³µÁ¾	Road 1	101.5164512	56.36705246	2.85E-06	0.882560372	0.639215708	0	118.2094	981.9902	655.7852	0.7286	3.7595	780	1.871268832	0.004322631	45.63033126	0.105406065
96.88010718	×ÔÉí³µÁ¾	Road 1	101.7774816	56.42507057	1.88E-06	0.882626653	0.639215708	0	118.5384	981.9922	655.7852	0.7326	3.7555	781	2.436729593	0.005628845	45.67091283	0.105499809
96.89678219	×ÔÉí³µÁ¾	Road 1	102.0390313	56.46648216	1.26E-06	0.881880403	0.639215708	0	118.7736	981.9941	655.7851	0.7349	3.7531	782	1.95061951	0.004505931	45.70343942	0.105574945
96.91346672	×ÔÉí³µÁ¾	Road 1	102.3009096	56.50513	7.64E-07	0.882416606	0.639215708	0	118.9932	981.9951	655.785	0.738	3.7501	783	1.870226191	0.004320223	45.73464327	0.105647026
96.93010214	×ÔÉí³µÁ¾	Road 1	102.5622847	56.56307945	4.00E-07	0.881460309	0.639215708	0	119.323	981.9971	655.785	0.742	3.7461	784	2.441855013	0.005640685	45.77526455	0.105740861
96.94680757	×ÔÉí³µÁ¾	Road 1	102.824939	56.6016861	1.84E-07	0.881366611	0.639215708	0	119.5431	981.999	655.785	0.744	3.744	785	1.870287893	0.004320365	45.80650852	0.105813035
96.96345618	×ÔÉí³µÁ¾	Road 1	103.0868914	56.64306679	6.46E-08	0.880816579	0.639215708	0	119.779	982	655.7849	0.7473	3.7407	786	1.956801379	0.004520211	45.83908655	0.10588829
96.98010443	×ÔÉí³µÁ¾	Road 1	103.3491055	56.70092354	8.36E-09	0.880480289	0.639215708	0	120.1096	982.002	655.7849	0.7514	3.7367	787	2.443036534	0.005643414	45.87975882	0.105982243
96.99935816	×ÔÉí³µÁ¾	Road 1	103.6526661	56.75877686	1.80E-10	0.880160272	0.639215708	0	120.4405	982.0039	655.7848	0.7555	3.7327	788	2.214577012	0.005115673	45.92239769	0.106080739
97.01413697	×ÔÉí³µÁ¾	Road 1	103.8858319	56.79732857	-8.06E-10	0.880236626	0.639215708	0	120.6613	982.0059	655.7848	0.7575	3.7306	789	2.021720818	0.004670175	45.95227632	0.106149758
97.0300829	×ÔÉí³µÁ¾	Road 1	104.1375821	56.83587341	-1.54E-08	0.879966557	0.639215708	0	120.8823	982.0068	655.7847	0.7606	3.7276	790	1.92893142	0.004455832	45.98303491	0.106220811
97.04685687	×ÔÉí³µÁ¾	Road 1	104.4025848	56.87439423	-5.22E-08	0.879870296	0.639215708	0	121.1034	982.0078	655.7847	0.7636	3.7246	791	1.870701987	0.004321322	46.01441402	0.106293296
97.06346003	×ÔÉí³µÁ¾	Road 1	104.665168	56.93490486	-1.38E-07	0.879486561	0.639215708	0	121.4511	982.0107	655.7846	0.767	3.7213	792	2.535089929	0.005856058	46.05650453	0.106390525
97.08011744	×ÔÉí³µÁ¾	Road 1	104.9287873	56.97340851	-2.65E-07	0.878980279	0.639215708	0	121.6726	982.0117	655.7845	0.77	3.7182	793	1.880839738	0.00434474	46.08783445	0.106462898
97.09762453	×ÔÉí³µÁ¾	Road 1	105.2061209	57.02838478	-4.26E-07	0.878420293	0.639215708	0	121.9893	982.0137	655.7845	0.7738	3.7145	794	2.290432157	0.005290898	46.12793325	0.106555526
97.11346269	×ÔÉí³µÁ¾	Road 1	105.4571858	57.06685066	-5.81E-07	0.878976583	0.639215708	0	122.2111	982.0146	655.7845	0.7769	3.7114	795	1.941204465	0.004484182	46.15867835	0.106626547
97.14771553	×ÔÉí³µÁ¾	Road 1	106.0010992	57.16571732	-6.90E-07	0.878090262	0.639215708	0	122.7823	982.0186	655.7844	0.7833	3.705	796	2.169331419	0.005011156	46.23298411	0.106798193
97.1652809	×ÔÉí³µÁ¾	Road 1	106.280227	57.20689201	-7.71E-07	0.87798655	0.639215708	0	123.0206	982.0195	655.7843	0.7867	3.7017	797	1.903394794	0.004396842	46.26641795	0.106875425
97.18013376	×ÔÉí³µÁ¾	Road 1	106.5164093	57.24529953	-7.71E-07	0.877476454	0.639215708	0	123.2431	982.0215	655.7843	0.7888	3.6996	798	2.024072989	0.004675609	46.29648121	0.106944872
97.1968883	×ÔÉí³µÁ¾	Road 1	106.7830101	57.28371391	-7.71E-07	0.878016531	0.639215708	0	123.4658	982.0225	655.7842	0.7919	3.6966	799	1.880184145	0.004343225	46.32798285	0.10701764
97.21506289	×ÔÉí³µÁ¾	Road 1	107.072525	57.346772	-7.71E-07	0.877046466	0.639215708	0	123.832	982.0254	655.7842	0.7956	3.6929	800	2.464569562	0.005693156	46.37277538	0.107121111
97.23182001	×ÔÉí³µÁ¾	Road 1	107.3396388	57.38515549	-7.71E-07	0.877530217	0.647058845	0	124.0551	982.0264	655.7841	0.7987	3.6898	801	1.881895225	0.004347178	46.40431051	0.107193957
97.24808557	×ÔÉí³µÁ¾	Road 1	107.5990907	57.42630959	-8.26E-07	0.878236532	0.647058845	0	124.2783	982.0273	655.7841	0.8017	3.6868	802	2.001825908	0.004624218	46.43687134	0.107269173
97.26343951	×ÔÉí³µÁ¾	Road 1	107.8442477	57.48136139	-9.10E-07	0.881740332	0.647058845	0	124.6135	982.0303	655.7841	0.8049	3.6837	803	2.527338888	0.005838153	46.47567594	0.107358811
97.28009289	×ÔÉí³µÁ¾	Road 1	108.1103445	57.52277985	-9.89E-07	0.883896589	0.647058845	0	124.8531	982.0313	655.784	0.8083	3.6803	804	1.983312838	0.004581453	46.5087048	0.107435108
97.29685293	×ÔÉí³µÁ¾	Road 1	108.3783259	57.56146202	-1.09E-06	0.883766592	0.647058845	0	125.0768	982.0322	655.7839	0.8114	3.6772	805	1.895416535	0.004378412	46.54047207	0.10750849
97.31346929	×ÔÉí³µÁ¾	Road 1	108.6442905	57.62230911	-1.33E-06	0.885256648	0.647058845	0	125.4288	982.0352	655.7839	0.8148	3.6738	806	2.570718824	0.00593836	46.58318805	0.107607164
97.33013366	×ÔÉí³µÁ¾	Road 1	108.9112289	57.66661835	-1.65E-06	0.885516644	0.647058845	0	125.685	982.0361	655.7838	0.8185	3.6702	807	2.073090918	0.00478884	46.61773482	0.107686967
97.34754325	×ÔÉí³µÁ¾	Road 1	109.190292	57.70540009	-1.95E-06	0.885596633	0.647058845	0	125.9093	982.0381	655.7838	0.8206	3.6681	808	1.859329552	0.004295051	46.65010497	0.107761742
97.36343676	×ÔÉí³µÁ¾	Road 1	109.4452248	57.74422302	-2.38E-06	0.886540353	0.647058845	0	126.1338	982.0391	655.7838	0.8237	3.665	809	1.967674009	0.004545327	46.68137822	0.107833984
97.38009637	×ÔÉí³µÁ¾	Road 1	109.7126385	57.78580627	-2.87E-06	0.886020362	0.647058845	0	126.3745	982.041	655.7837	0.8261	3.6626	810	1.995483817	0.004609568	46.7146222	0.107910777
97.39695209	×ÔÉí³µÁ¾	Road 1	109.9834726	57.84404755	-3.21E-06	0.88648659	0.647058845	0	126.6314	982.042	655.7836	0.8298	3.6589	811	2.476278944	0.005720204	46.75636166	0.108007195
97.41390347	×ÔÉí³µÁ¾	Road 1	110.256053	57.88843918	-3.21E-06	0.885500312	0.639215708	0	126.9689	982.0439	655.7836	0.834	3.6548	812	2.059829732	0.004758207	46.79127863	0.108087854
97.43009499	×ÔÉí³µÁ¾	Road 1	110.5165889	57.92720032	-3.23E-06	0.884020329	0.639215708	0	127.1941	982.0459	655.7836	0.8361	3.6527	813	1.948551436	0.004501154	46.82282864	0.108160734
97.44675607	×ÔÉí³µÁ¾	Road 1	110.7849614	57.98789978	-3.23E-06	0.880626559	0.639215708	0	127.5483	982.0479	655.7834	0.8406	3.6482	814	2.575773102	0.005950036	46.86574379	0.108259868
97.46341568	×ÔÉí³µÁ¾	Road 1	111.0534884	58.02639999	-3.23E-06	0.879736483	0.639215708	0	127.7739	982.0488	655.7834	0.8437	3.6451	815	1.909807928	0.004411656	46.89756045	0.108333365
97.48015007	×ÔÉí³µÁ¾	Road 1	111.3234888	58.08407822	-3.29E-06	0.879006505	0.639215708	0	128.1126	982.0508	655.7833	0.8479	3.6409	816	2.481009845	0.005731133	46.93907863	0.108429272
97.49677815	×ÔÉí³µÁ¾	Road 1	111.5919514	58.12246857	-3.61E-06	0.8774665	0.639215708	0	128.3385	982.0527	655.7833	0.8501	3.6388	817	1.911357191	0.004415235	46.97086084	0.108502689
97.51348175	×ÔÉí³µÁ¾	Road 1	111.8618111	58.16081085	-4.34E-06	0.876746416	0.639215708	0	128.5646	982.0537	655.7833	0.8532	3.6357	818	1.90573088	0.004402238	47.0026934	0.108576222
97.53013293	×ÔÉí³µÁ¾	Road 1	112.1310137	58.20185165	-5.53E-06	0.87522018	0.631372571	0	128.8071	982.0557	655.7833	0.8557	3.6333	819	1.991955551	0.004601417	47.03586181	0.108652841
97.54692377	×ÔÉí³µÁ¾	Road 1	112.4027539	58.26181641	-7.43E-06	0.872680068	0.631372571	0	129.1629	982.0576	655.7832	0.8602	3.6288	820	2.550350618	0.00589131	47.07868434	0.108751761
97.56369298	×ÔÉí³µÁ¾	Road 1	112.6743211	58.29980164	-1.01E-05	0.868920028	0.631372571	0	129.3896	982.0586	655.7831	0.8633	3.6257	821	1.894324892	0.004375891	47.11045067	0.108825141
97.58012606	×ÔÉí³µÁ¾	Road 1	112.9407038	58.35655975	-1.45E-05	0.866369963	0.631372571	0	129.7298	982.0615	655.7831	0.8666	3.6225	822	2.494891281	0.005763199	47.15144942	0.108919848
97.59687218	×ÔÉí³µÁ¾	Road 1	113.2123367	58.39433899	-2.01E-05	0.865009964	0.631372571	0	129.9568	982.0625	655.783	0.8697	3.6193	823	1.892283077	0.004371174	47.18313781	0.108993048
97.6134834	×ÔÉí³µÁ¾	Road 1	113.4819555	58.43202896	-2.75E-05	0.863486171	0.631372571	0	130.184	982.0635	655.783	0.8729	3.6162	824	1.899847267	0.004388647	47.2146966	0.109065949
97.63009903	×ÔÉí³µÁ¾	Road 1	113.7519062	58.48847122	-3.79E-05	0.862129927	0.631372571	0	130.525	982.0664	655.783	0.8761	3.6129	825	2.471084822	0.005708206	47.25575522	0.109160795
97.64678686	×ÔÉí³µÁ¾	Road 1	114.0232041	58.526017	-4.77E-05	0.861036122	0.631372571	0	130.7525	982.0674	655.7829	0.8793	3.6098	826	1.892787068	0.004372338	47.28734174	0.109233759
97.66345014	×ÔÉí³µÁ¾	Road 1	114.2942763	58.56351471	-5.83E-05	0.860936105	0.631372571	0	130.9802	982.0684	655.7828	0.8825	3.6066	827	1.894026591	0.004375201	47.31890242	0.109306665
97.68009142	×ÔÉí³µÁ¾	Road 1	114.565263	58.62239456	-7.11E-05	0.859576106	0.631372571	0	131.3383	982.0713	655.7828	0.886	3.603	828	2.547540739	0.005884819	47.36129677	0.109404596
97.6968445	×ÔÉí³µÁ¾	Road 1	114.8382442	58.65980988	-8.25E-05	0.858659863	0.631372571	0	131.5663	982.0723	655.7827	0.8892	3.5999	829	1.888043294	0.00436138	47.39292731	0.109477662
97.7134286	×ÔÉí³µÁ¾	Road 1	115.1086443	58.69720459	-9.47E-05	0.858139813	0.631372571	0	131.7945	982.0742	655.7827	0.8914	3.5977	830	1.899965948	0.004388921	47.42443654	0.109550448
97.73011827	×ÔÉí³µÁ¾	Road 1	115.3810377	58.75589218	-0.000109051	0.857626081	0.631372571	0	132.1534	982.0762	655.7826	0.896	3.5931	831	2.541611626	0.005871123	47.46685519	0.109648435
97.74676615	×ÔÉí³µÁ¾	Road 1	115.6529218	58.79321823	-0.000121402	0.85669601	0.631372571	0	132.382	982.0771	655.7826	0.8991	3.5899	832	1.89610154	0.004379995	47.49842127	0.109721353
97.76340303	×ÔÉí³µÁ¾	Road 1	115.9247985	58.83050995	-0.000133213	0.856595993	0.623529434	0	132.6107	982.0791	655.7825	0.9013	3.5877	833	1.896818867	0.004381652	47.52997842	0.10979425
97.78010993	×ÔÉí³µÁ¾	Road 1	116.1980907	58.88897095	-0.000147805	0.85319972	0.623529434	0	132.9704	982.0811	655.7825	0.9059	3.5831	834	2.537950802	0.005862666	47.5723797	0.109892197
97.79779187	×ÔÉí³µÁ¾	Road 1	116.4875145	58.92599487	-0.000162606	0.849989653	0.623529434	0	133.1995	982.082	655.7824	0.9091	3.58	835	1.824261615	0.004214044	47.60463618	0.10996671
97.81342915	×ÔÉí³µÁ¾	Road 1	116.7436312	58.96292267	-0.000181574	0.848295987	0.623529434	0	133.4287	982.084	655.7823	0.9113	3.5777	836	1.961551752	0.004531185	47.63530952	0.110037565
97.83008363	×ÔÉí³µÁ¾	Road 1	117.0166636	59.0181633	-0.000205448	0.846769273	0.623529434	0	133.7728	982.0859	655.7823	0.9156	3.5735	837	2.449949936	0.005659384	47.67611216	0.110131819
97.84690599	×ÔÉí³µÁ¾	Road 1	117.2926202	59.05495377	-0.000231674	0.846262515	0.623529434	0	134.0024	982.0869	655.7822	0.9188	3.5703	838	1.875106109	0.004331495	47.70765587	0.110204685
97.86340798	×ÔÉí³µÁ¾	Road 1	117.5635738	59.11001587	-0.00026379	0.844502628	0.623529434	0	134.3471	982.0898	655.7822	0.9221	3.5669	839	2.463425315	0.005690512	47.7483073	0.11029859
97.88008812	×ÔÉí³µÁ¾	Road 1	117.8376223	59.14666901	-0.00030617	0.843989253	0.623529434	0	134.577	982.0908	655.7822	0.9252	3.5637	840	1.882875785	0.004349443	47.77971392	0.110371139
97.89680565	×ÔÉí³µÁ¾	Road 1	118.1124551	59.18326721	-0.0003465	0.84227258	0.623529434	0	134.8071	982.0918	655.7821	0.9284	3.5605	841	1.879663085	0.004342022	47.81113724	0.110443727
97.91339158	×ÔÉí³µÁ¾	Road 1	118.3852928	59.21982422	-0.000391693	0.842569172	0.623529434	0	135.0373	982.0938	655.7821	0.9306	3.5583	842	1.888255058	0.004361869	47.84245571	0.110516073
97.94688455	×ÔÉí³µÁ¾	Road 1	118.9371969	59.32154388	-0.000447583	0.84070915	0.623529434	0	135.6135	982.0977	655.782	0.9371	3.5517	843	2.317012381	0.005352299	47.92005934	0.110695337
97.96345655	×ÔÉí³µÁ¾	Road 1	119.2104776	59.36582565	-0.000502161	0.840559185	0.623529434	0	135.9597	982.0996	655.7819	0.9414	3.5474	844	2.132103033	0.004925158	47.95539255	0.110776957
97.98008024	×ÔÉí³µÁ¾	Road 1	119.4847789	59.40224533	-0.000631661	0.838832855	0.623529434	0	136.1906	982.1006	655.7819	0.9446	3.5442	845	1.886341379	0.004357449	47.9867505	0.110849394
97.9967897	×ÔÉí³µÁ¾	Road 1	119.7606644	59.43865814	-0.000694285	0.839309573	0.623529434	0	136.4217	982.1025	655.7818	0.9469	3.5419	846	1.88132805	0.004345868	48.01818648	0.110922011
98.0134834	×ÔÉí³µÁ¾	Road 1	120.0365549	59.49583511	-0.000755588	0.838162899	0.623529434	0	136.7851	982.1045	655.7817	0.9515	3.5373	847	2.52293474	0.005827979	48.0603036	0.111019301
98.03012175	×ÔÉí³µÁ¾	Road 1	120.3116987	59.53219986	-0.00082522	0.838886261	0.623529434	0	137.0165	982.1055	655.7817	0.9547	3.5341	848	1.887122113	0.004359252	48.0917022	0.111091832
98.04685247	×ÔÉí³µÁ¾	Road 1	120.5886234	59.58672638	-0.000883741	0.838090003	0.623529434	0	137.364	982.1084	655.7816	0.958	3.5307	849	2.440930507	0.005638549	48.13254073	0.111186169
98.06342631	×ÔÉí³µÁ¾	Road 1	120.8631185	59.62304306	-0.000947612	0.837820172	0.623529434	0	137.5958	982.1094	655.7816	0.9612	3.5274	850	1.892433358	0.004371521	48.16390561	0.111258622
98.08007859	×ÔÉí³µÁ¾	Road 1	121.1390808	59.65935287	-0.001017265	0.837710381	0.623529434	0	137.8277	982.1113	655.7816	0.9635	3.5252	851	1.887870738	0.004360981	48.19534296	0.111331242
98.09685623	×ÔÉí³µÁ¾	Road 1	121.4173743	59.713797	-0.001076728	0.836747229	0.623529434	0	138.1759	982.1133	655.7815	0.9678	3.5208	852	2.438264559	0.005632391	48.23625129	0.11142574
98.11348798	×ÔÉí³µÁ¾	Road 1	121.6934155	59.75005188	-0.001125538	0.83601737	0.623529434	0	138.4082	982.1143	655.7814	0.971	3.5176	853	1.889970052	0.004365831	48.2676848	0.111498352
98.13009224	×ÔÉí³µÁ¾	Road 1	121.9692512	59.80444794	-0.001171725	0.836718261	0.623529434	0	138.7569	982.1172	655.7814	0.9744	3.5142	854	2.45752162	0.005676875	48.30849013	0.111592612
98.14681307	×ÔÉí³µÁ¾	Road 1	122.2471916	59.84068222	-0.001199414	0.836005509	0.623529434	0	138.9895	982.1182	655.7813	0.9786	3.5109	855	1.885742188	0.004356064	48.3400213	0.111665449
98.16341256	×ÔÉí³µÁ¾	Road 1	122.5232823	59.87690964	-0.00122125	0.836305916	0.623529434	0	139.2223	982.1201	655.7813	0.9809	3.5086	856	1.894682114	0.004376716	48.37147207	0.1117381
98.1800971	×ÔÉí³µÁ¾	Road 1	122.8009554	59.91314392	-0.001241233	0.835769951	0.623529434	0	139.4552	982.1211	655.7813	0.9841	3.5054	857	1.890102439	0.004366137	48.40300755	0.111810947
98.19673838	×ÔÉí³µÁ¾	Road 1	123.0781835	59.97260742	-0.001258228	0.835230649	0.623529434	0	139.8382	982.124	655.7812	0.9881	3.5014	858	2.617487089	0.006046395	48.44656589	0.111911567
98.21342915	×ÔÉí³µÁ¾	Road 1	123.3564037	60.00879364	-0.001266784	0.835531235	0.623529434	0	140.0715	982.125	655.7811	0.9913	3.4981	859	1.890728664	0.004367583	48.4781236	0.111984466
98.23014484	×ÔÉí³µÁ¾	Road 1	123.6352074	60.04497986	-0.001268929	0.835018396	0.623529434	0	140.3049	982.127	655.7811	0.9936	3.4958	860	1.890011034	0.004365925	48.50971645	0.112057445
98.24677623	×ÔÉí³µÁ¾	Road 1	123.912784	60.08372726	-0.001268929	0.834925711	0.631372571	0	140.5552	982.1289	655.7811	0.9961	3.4933	861	1.976645655	0.004566051	48.54259081	0.112133385
98.26342741	×ÔÉí³µÁ¾	Road 1	124.190966	60.14319763	-0.001268929	0.837210178	0.631372571	0	140.9393	982.1309	655.781	1.0011	3.4883	862	2.623192504	0.006059575	48.58627005	0.112234284
98.28012807	×ÔÉí³µÁ¾	Road 1	124.4701433	60.17954178	-0.00128185	0.839960933	0.631372571	0	141.1732	982.1328	655.7809	1.0034	3.486	863	1.899502913	0.004387852	48.61799302	0.112307564
98.29686246	×ÔÉí³µÁ¾	Road 1	124.7500536	60.21594772	-0.001289427	0.840428114	0.631372571	0	141.4073	982.1338	655.7809	1.0067	3.4828	864	1.900109847	0.004389254	48.64979019	0.112381015
98.31344143	×ÔÉí³µÁ¾	Road 1	125.0275563	60.25764084	-0.001289427	0.841532528	0.631372571	0	141.675	982.1357	655.7808	1.0095	3.4799	865	2.077797366	0.004799712	48.68423793	0.11246059
98.33010544	×ÔÉí³µÁ¾	Road 1	125.3067598	60.31759186	-0.001289427	0.841673434	0.631372571	0	142.0602	982.1387	655.7808	1.0136	3.4758	866	2.643519281	0.00610653	48.72828956	0.112562349
98.34676945	×ÔÉí³µÁ¾	Road 1	125.5861326	60.35413513	-0.001289427	0.843128145	0.631372571	0	142.2949	982.1396	655.7808	1.0168	3.4726	867	1.912869295	0.004418728	48.76016563	0.112635983
98.36342136	×ÔÉí³µÁ¾	Road 1	125.8654717	60.39071274	-0.001289427	0.843408942	0.631372571	0	142.5296	982.1416	655.7807	1.0191	3.4703	868	1.915753488	0.004425391	48.79206659	0.112709674
98.38012936	×ÔÉí³µÁ¾	Road 1	126.1459578	60.43774796	-0.001289427	0.843729794	0.631372571	0	142.7813	982.1436	655.7806	1.0227	3.4677	869	2.239826728	0.005174	48.8294896	0.112796121
98.39687511	×ÔÉí³µÁ¾	Road 1	126.4273088	60.48480377	-0.001289427	0.843758166	0.631372571	0	143.134	982.1455	655.7806	1.0271	3.4633	870	2.238683985	0.00517136	48.86697805	0.112882719
98.41345334	×ÔÉí³µÁ¾	Road 1	126.7060981	60.53971481	-0.001289427	0.844649494	0.631372571	0	143.487	982.1484	655.7805	1.0306	3.4598	871	2.502983653	0.005781892	48.9084731	0.112978573
98.43009463	×ÔÉí³µÁ¾	Road 1	126.9861169	60.57632675	-0.001294858	0.844313264	0.631372571	0	143.7225	982.1494	655.7805	1.0338	3.4565	872	1.922534349	0.004441054	48.94046654	0.113052478
98.44680959	×ÔÉí³µÁ¾	Road 1	127.2675698	60.61817093	-0.001303578	0.843814254	0.631372571	0	143.9918	982.1514	655.7805	1.0368	3.4536	873	2.082453281	0.004810467	48.97527466	0.113132884
98.46340725	×ÔÉí³µÁ¾	Road 1	127.5472164	60.6547966	-0.001321137	0.844755054	0.631372571	0	144.2276	982.1533	655.7804	1.0391	3.4513	874	1.928099921	0.004453911	49.00727661	0.113206809
98.48008592	×ÔÉí³µÁ¾	Road 1	127.8284944	60.71232376	-0.00134777	0.843956411	0.631372571	0	144.5985	982.1563	655.7803	1.0429	3.4476	875	2.581027834	0.005962174	49.05032473	0.11330625
98.49678072	×ÔÉí³µÁ¾	Road 1	128.1102143	60.74894257	-0.001373627	0.844487369	0.631372571	0	144.8346	982.1572	655.7803	1.0463	3.4443	876	1.923673219	0.004443685	49.08244007	0.113380437
98.5134484	×ÔÉí³µÁ¾	Road 1	128.3916459	60.78556137	-0.001405548	0.844166458	0.631372571	0	145.071	982.1592	655.7803	1.0486	3.4419	877	1.926526735	0.004450277	49.11455079	0.113454612
98.5301278	×ÔÉí³µÁ¾	Road 1	128.67353	60.84045868	-0.00144497	0.843995154	0.631372571	0	145.4257	982.1621	655.7802	1.0522	3.4385	878	2.502940393	0.005781792	49.15629834	0.113551049
98.54683726	×ÔÉí³µÁ¾	Road 1	128.9560919	60.87705002	-0.001483931	0.844125092	0.631372571	0	145.6624	982.1631	655.7802	1.0555	3.4352	879	1.925221441	0.004447262	49.18846776	0.113625361
98.5634056	×ÔÉí³µÁ¾	Road 1	129.2364357	60.91362762	-0.00152844	0.843793571	0.631372571	0	145.8992	982.165	655.7801	1.0588	3.4328	880	1.935578103	0.004471185	49.22053707	0.113699441
98.58011799	×ÔÉí³µÁ¾	Road 1	129.5194839	60.97112732	-0.00158625	0.84362638	0.631372571	0	146.2716	982.168	655.78	1.0627	3.429	881	2.586224387	0.005974178	49.26375907	0.113799283
98.59686558	×ÔÉí³µÁ¾	Road 1	129.8032981	61.00768433	-0.001640401	0.843531251	0.631372571	0	146.5088	982.1689	655.78	1.066	3.4257	882	1.925002271	0.004446755	49.29599821	0.113873756
98.61342255	×ÔÉí³µÁ¾	Road 1	130.0841344	61.06251984	-0.001694469	0.842546582	0.631372571	0	146.8648	982.1719	655.7799	1.0696	3.4222	883	2.521853052	0.005825481	49.33775247	0.113970208
98.63010159	×ÔÉí³µÁ¾	Road 1	130.3672103	61.09904938	-0.001760368	0.843268573	0.631372571	0	147.1024	982.1738	655.7799	1.0719	3.4199	884	1.931302706	0.004461309	49.36996474	0.114044619
98.64684074	×ÔÉí³µÁ¾	Road 1	130.6514765	61.13559265	-0.001811579	0.843147457	0.631372571	0	147.34	982.1758	655.7799	1.0743	3.4175	885	1.928557446	0.004454968	49.40224716	0.114119191
98.6634516	×ÔÉí³µÁ¾	Road 1	130.9338166	61.19036636	-0.001863774	0.842851937	0.631372571	0	147.6968	982.1777	655.7798	1.0788	3.413	886	2.51886232	0.005818572	49.44408762	0.114215842
98.68012661	×ÔÉí³µÁ¾	Road 1	131.2174162	61.22688904	-0.001926868	0.842892468	0.631372571	0	147.9349	982.1797	655.7798	1.0812	3.4107	887	1.934779042	0.00446934	49.47635007	0.114290369
98.69680638	×ÔÉí³µÁ¾	Road 1	131.5012661	61.26339798	-0.001984134	0.841793895	0.631372571	0	148.173	982.1816	655.7797	1.0836	3.4083	888	1.934987221	0.00446982	49.50862522	0.114364924
98.71345609	×ÔÉí³µÁ¾	Road 1	131.7848695	61.32071915	-0.002033692	0.842452466	0.631372571	0	148.5476	982.1846	655.7797	1.0885	3.4045	889	2.600521735	0.006007205	49.55192316	0.114464943
98.73003983	×ÔÉí³µÁ¾	Road 1	132.0675171	61.35719376	-0.002088554	0.841720104	0.631372571	0	148.7861	982.1865	655.7797	1.0909	3.402	890	1.943113076	0.004488591	49.58414723	0.11453938
98.7468105	×ÔÉí³µÁ¾	Road 1	132.3535207	61.39364777	-0.002126175	0.841605306	0.639215708	0	149.0248	982.1875	655.7795	1.0942	3.3982	891	1.930434233	0.004459303	49.61652192	0.114614166
98.76344299	×ÔÉí³µÁ¾	Road 1	132.6373364	61.43015671	-0.002158124	0.843541086	0.639215708	0	149.2636	982.1895	655.7795	1.0966	3.3955	892	1.942741128	0.004487732	49.64883453	0.114688808
98.78011689	×ÔÉí³µÁ¾	Road 1	132.9221375	61.49033432	-0.002179601	0.846184373	0.639215708	0	149.6563	982.1924	655.7795	1.1009	3.3923	893	2.695182228	0.006225871	49.69377375	0.114792617
98.7968916	×ÔÉí³µÁ¾	Road 1	133.2088316	61.52707672	-0.002190392	0.848372459	0.639215708	0	149.8955	982.1943	655.7794	1.1033	3.3899	894	1.942836551	0.004487952	49.72636427	0.114867901
98.81340313	×ÔÉí³µÁ¾	Road 1	133.4911964	61.56387405	-0.002190392	0.848834515	0.639215708	0	150.1348	982.1963	655.7794	1.1057	3.3875	895	1.964157713	0.004537204	49.7587955	0.114942818
98.8311679	×ÔÉí³µÁ¾	Road 1	133.7952786	61.62171021	-0.002218305	0.849491894	0.639215708	0	150.5112	982.1992	655.7793	1.1096	3.3836	896	2.512215995	0.005803219	49.80342446	0.11504591
98.84682645	×ÔÉí³µÁ¾	Road 1	134.0634685	61.6585762	-0.002271674	0.850174248	0.639215708	0	150.7509	982.2012	655.7793	1.113	3.3813	897	2.033721737	0.004697897	49.83526958	0.115119473
98.86339405	×ÔÉí³µÁ¾	Road 1	134.347495	61.71654282	-0.002333937	0.850417972	0.639215708	0	151.1279	982.2041	655.7792	1.1169	3.3774	898	2.645232184	0.006110486	49.87909474	0.115220709
98.88003754	×ÔÉí³µÁ¾	Road 1	134.6329929	61.75345001	-0.002402251	0.850941539	0.639215708	0	151.368	982.2061	655.7792	1.1193	3.375	899	1.963376976	0.004535401	49.91177217	0.115296194
98.89679832	×ÔÉí³µÁ¾	Road 1	134.9206993	61.79565125	-0.002481941	0.850995004	0.639215708	0	151.6425	982.209	655.7792	1.1214	3.3729	900	2.124800776	0.00490829	49.94738549	0.11537846
98.91345683	×ÔÉí³µÁ¾	Road 1	135.2068211	61.83256531	-0.002566806	0.85065186	0.639215708	0	151.8829	982.2109	655.7791	1.1238	3.3706	901	1.964659885	0.004538364	49.9801138	0.115454063
98.93008894	×ÔÉí³µÁ¾	Road 1	135.4926969	61.87742386	-0.002664127	0.851975441	0.639215708	0	152.1406	982.2129	655.7791	1.1265	3.3678	902	2.223003908	0.005135139	50.01708706	0.115539471
98.94681527	×ÔÉí³µÁ¾	Road 1	135.7804369	61.93017883	-0.002758471	0.851166189	0.639215708	0	152.5189	982.2158	655.7791	1.1305	3.3639	903	2.468982871	0.00570335	50.05838407	0.115634867
98.96346388	×ÔÉí³µÁ¾	Road 1	136.067011	61.96712036	-0.002864239	0.851674557	0.639215708	0	152.7598	982.2178	655.779	1.1337	3.3615	904	1.969871314	0.004550403	50.0911797	0.115710625
98.98005605	×ÔÉí³µÁ¾	Road 1	136.3528808	62.02514191	-0.003003065	0.851135492	0.639215708	0	153.1387	982.2207	655.7789	1.1375	3.3576	905	2.655961639	0.006135271	50.13524785	0.115812423
98.99682196	×ÔÉí³µÁ¾	Road 1	136.6419161	62.06206284	-0.003118864	0.851955473	0.639215708	0	153.38	982.2227	655.7789	1.1399	3.3552	906	1.963448182	0.004535565	50.16816685	0.115888465
99.01343612	×ÔÉí³µÁ¾	Road 1	136.9285056	62.09898376	-0.003249639	0.85061878	0.639215708	0	153.6214	982.2246	655.7788	1.1423	3.3528	907	1.975229346	0.00456278	50.20098362	0.115964272
99.03035048	×ÔÉí³µÁ¾	Road 1	137.2205338	62.15434113	-0.003379895	0.850021124	0.631372571	0	153.9838	982.2285	655.7788	1.145	3.3501	908	2.540580079	0.00586874	50.24395592	0.116063538
99.04678539	×ÔÉí³µÁ¾	Road 1	137.5044521	62.19113159	-0.003490361	0.847896874	0.631372571	0	154.2256	982.2305	655.7787	1.1484	3.3477	909	1.986474197	0.004588755	50.27660345	0.116138954
99.06338306	×ÔÉí³µÁ¾	Road 1	137.7913631	62.23042831	-0.003588166	0.845310986	0.631372571	0	154.4848	982.2324	655.7787	1.1512	3.345	910	2.056896216	0.00475143	50.31074312	0.116217817
99.08006979	×ÔÉí³µÁ¾	Road 1	138.0800681	62.28528442	-0.003692154	0.84311074	0.631372571	0	154.8479	982.2354	655.7787	1.1549	3.3413	911	2.553168093	0.005897818	50.35334716	0.116316232
99.096747	×ÔÉí³µÁ¾	Road 1	138.3687772	62.3217659	-0.003800361	0.842429578	0.631372571	0	155.0902	982.2383	655.7786	1.1563	3.3399	912	1.962533575	0.004533453	50.38607673	0.116391837
99.11341137	×ÔÉí³µÁ¾	Road 1	138.6574329	62.35820618	-0.00394028	0.841252327	0.631372571	0	155.3327	982.2402	655.7786	1.1588	3.3374	913	1.963081655	0.004534719	50.41879026	0.116467406
99.13009884	×ÔÉí³µÁ¾	Road 1	138.9467537	62.41537628	-0.004132908	0.839848459	0.631372571	0	155.7139	982.2432	655.7786	1.1638	3.3335	914	2.632526501	0.006081136	50.46272047	0.116568884
99.1468303	×ÔÉí³µÁ¾	Road 1	139.2370058	62.45169296	-0.004336582	0.839118242	0.631372571	0	155.9567	982.2461	655.7785	1.1653	3.332	915	1.956860714	0.004520348	50.4954616	0.116644516
99.16339937	×ÔÉí³µÁ¾	Road 1	139.524608	62.48797531	-0.004561932	0.8383407	0.631372571	0	156.1996	982.248	655.7785	1.1677	3.3305	916	1.968189411	0.004546518	50.52807267	0.116719848
99.18011506	×ÔÉí³µÁ¾	Road 1	139.8150076	62.5423439	-0.004810595	0.837299347	0.631372571	0	156.5643	982.251	655.7784	1.1714	3.3269	917	2.543643895	0.005875817	50.57059144	0.116818066
99.19676917	×ÔÉí³µÁ¾	Road 1	140.1045048	62.57853699	-0.005046554	0.837180853	0.631372571	0	156.8076	982.2539	655.7784	1.1739	3.3254	918	1.961665322	0.004531447	50.60326123	0.116893533
99.21339396	×ÔÉí³µÁ¾	Road 1	140.3937428	62.63278885	-0.005292885	0.836127043	0.631372571	0	157.1728	982.2568	655.7783	1.1776	3.3217	919	2.55271488	0.005896771	50.64569958	0.116991566
99.24685651	×ÔÉí³µÁ¾	Road 1	140.9764759	62.69216309	-0.005552845	0.835509241	0.631372571	0	157.5731	982.2617	655.7783	1.18	3.3194	920	1.748464695	0.004038953	50.70420765	0.11712672
99.26395598	×ÔÉí³µÁ¾	Road 1	141.274573	62.75918655	-0.005770959	0.834850192	0.631372571	0	158.0261	982.2656	655.7783	1.1854	3.3151	921	2.912850454	0.006728685	50.75401587	0.117241777
99.28002874	×ÔÉí³µÁ¾	Road 1	141.5549321	62.79526291	-0.006183988	0.835059106	0.631372571	0	158.2702	982.2686	655.7782	1.1869	3.3136	922	2.006127731	0.004634155	50.78625987	0.11731626
99.29675873	×ÔÉí³µÁ¾	Road 1	141.846923	62.8313118	-0.006339501	0.834098399	0.631372571	0	158.5145	982.2705	655.7782	1.1894	3.3111	923	1.958351026	0.004523791	50.81902306	0.117391943
99.31340734	×ÔÉí³µÁ¾	Road 1	142.1377435	62.88535767	-0.006475309	0.833483219	0.631372571	0	158.8811	982.2744	655.7781	1.1931	3.3084	924	2.552546802	0.005896383	50.86151943	0.11749011
99.33004056	×ÔÉí³µÁ¾	Road 1	142.4284615	62.92135162	-0.006590489	0.83314997	0.631372571	0	159.1258	982.2773	655.7781	1.1946	3.3069	925	1.965747989	0.004540878	50.89421615	0.117565639
99.34669137	×ÔÉí³µÁ¾	Road 1	142.7196535	62.95735931	-0.006651826	0.83327806	0.631372571	0	159.3705	982.2803	655.7781	1.1962	3.3054	926	1.965906151	0.004541243	50.92695008	0.117641255
99.36369005	×ÔÉí³µÁ¾	Road 1	143.017208	63.01645203	-0.006707028	0.832863569	0.631372571	0	159.7729	982.2842	655.778	1.2005	3.3019	927	2.682393809	0.00619633	50.97254722	0.117746584
99.38003955	×ÔÉí³µÁ¾	Road 1	143.3035623	63.05241852	-0.006752716	0.832564831	0.631372571	0	160.0181	982.2871	655.778	1.2021	3.3014	928	1.988759641	0.004594035	51.00506245	0.117821694
99.39677797	×ÔÉí³µÁ¾	Road 1	143.5968954	63.08833008	-0.006808474	0.831407189	0.631372571	0	160.2633	982.29	655.778	1.2046	3.2999	929	1.960073953	0.004527771	51.037871	0.117897482
99.41372386	×ÔÉí³µÁ¾	Road 1	143.8941301	63.14480667	-0.006881085	0.832046151	0.631372571	0	160.649	982.2939	655.778	1.2077	3.2968	930	2.608986491	0.006026759	51.0820826	0.117999611
99.43009206	×ÔÉí³µÁ¾	Road 1	144.1814069	63.18327255	-0.007011071	0.831512928	0.631372571	0	160.9122	982.2979	655.778	1.2096	3.2959	931	2.074221839	0.004791452	51.11603387	0.118078038
99.44675534	×ÔÉí³µÁ¾	Road 1	144.4740286	63.21916351	-0.007142683	0.83137095	0.631372571	0	161.1579	982.3008	655.7779	1.2111	3.2944	932	1.968126677	0.004546373	51.14882931	0.118153796
99.46364588	×ÔÉí³µÁ¾	Road 1	144.7709059	63.27554398	-0.007296578	0.830758452	0.631372571	0	161.5444	982.3047	655.7778	1.2152	3.2912	933	2.616628804	0.006044413	51.19302558	0.118255889
99.48008226	×ÔÉí³µÁ¾	Road 1	145.0599642	63.31138	-0.007449176	0.8302145	0.631372571	0	161.7906	982.3076	655.7778	1.2168	3.2897	934	1.984996671	0.004585342	51.22565174	0.118331256
99.49679025	×ÔÉí³µÁ¾	Road 1	145.3539776	63.34981155	-0.007540339	0.830857575	0.631372571	0	162.0544	982.3115	655.7778	1.2186	3.2888	935	2.051617545	0.004739237	51.25993016	0.118410439
99.51355323	×ÔÉí³µÁ¾	Road 1	145.6492089	63.40356903	-0.007589733	0.829886258	0.631372571	0	162.4241	982.3154	655.7778	1.2214	3.287	936	2.549566435	0.005889498	51.30266849	0.118509164
99.53004166	×ÔÉí³µÁ¾	Road 1	145.9397689	63.43938446	-0.007639343	0.829939961	0.631372571	0	162.6707	982.3193	655.7778	1.223	3.2864	937	1.983947221	0.004582918	51.33538066	0.118584729
99.54671153	×ÔÉí³µÁ¾	Road 1	146.2337038	63.47773361	-0.007714163	0.829611361	0.631372571	0	162.9351	982.3223	655.7777	1.2248	3.2845	938	2.055330201	0.004747813	51.36964275	0.118663875
99.56361307	×ÔÉí³µÁ¾	Road 1	146.5319757	63.53142242	-0.007782276	0.829054713	0.631372571	0	163.3055	982.3271	655.7777	1.2276	3.2827	939	2.537447367	0.005861503	51.41252952	0.118762943
99.58003662	×ÔÉí³µÁ¾	Road 1	146.8219754	63.56718979	-0.007850789	0.829128563	0.631372571	0	163.5527	982.3311	655.7777	1.2282	3.2821	940	1.990446184	0.004597931	51.44521971	0.118838458
99.59671749	×ÔÉí³µÁ¾	Road 1	147.1166962	63.60550461	-0.007887009	0.828596771	0.631372571	0	163.8176	982.334	655.7776	1.231	3.2802	941	2.056900145	0.004751439	51.47953059	0.118917716
99.61341046	×ÔÉí³µÁ¾	Road 1	147.4117966	63.64125824	-0.007894266	0.828468621	0.631372571	0	164.065	982.3379	655.7776	1.2316	3.2796	942	1.972637987	0.004556794	51.51245977	0.118993782
99.63003158	×ÔÉí³µÁ¾	Road 1	147.7058038	63.67955246	-0.007894266	0.828336537	0.631372571	0	164.3302	982.3408	655.7776	1.2344	3.2777	943	2.062806834	0.004765084	51.54674594	0.119072983
99.64674837	×ÔÉí³µÁ¾	Road 1	148.0017046	63.72292786	-0.007894266	0.827980042	0.631372571	0	164.631	982.3457	655.7776	1.2349	3.2781	944	2.224027892	0.005137504	51.58392455	0.119158866
99.66342961	×ÔÉí³µÁ¾	Road 1	148.2971652	63.76374207	-0.007894266	0.827701032	0.631372571	0	164.9143	982.3496	655.7776	1.2371	3.2769	945	2.143757206	0.004952079	51.61968507	0.119241473
99.68002031	×ÔÉí³µÁ¾	Road 1	148.5913042	63.82494965	-0.007894266	0.827308536	0.631372571	0	165.3396	982.3555	655.7776	1.2399	3.275	946	2.830345175	0.006538097	51.66664247	0.119349944
99.69691305	×ÔÉí³µÁ¾	Road 1	148.8909775	63.8631752	-0.007894266	0.827255547	0.631372571	0	165.6056	982.3594	655.7776	1.2408	3.2741	947	2.04520982	0.004724435	51.70119167	0.119429753
99.71337069	×ÔÉí³µÁ¾	Road 1	149.1831069	63.90138016	-0.007894266	0.827089131	0.631372571	0	165.8717	982.3633	655.7775	1.2427	3.2731	948	2.078590412	0.004801544	51.73540036	0.119508775
99.73008785	×ÔÉí³µÁ¾	Road 1	149.4800914	63.95489044	-0.007876132	0.82737273	0.631372571	0	166.2446	982.3691	655.7775	1.2446	3.2722	949	2.565824148	0.005927054	51.77829365	0.119607858
99.74680024	×ÔÉí³µÁ¾	Road 1	149.7771567	63.99052734	-0.007865263	0.826464355	0.631372571	0	166.4933	982.373	655.7775	1.2451	3.2716	950	1.976582537	0.004565906	51.81132708	0.119684166
99.76337481	×ÔÉí³µÁ¾	Road 1	150.071936	64.02613678	-0.00782911	0.826394737	0.631372571	0	166.7422	982.377	655.7775	1.2467	3.272	951	1.986407686	0.004588602	51.84425093	0.11976022
99.78004138	×ÔÉí³µÁ¾	Road 1	150.3685991	64.0795784	-0.007767903	0.826216877	0.631372571	0	167.1158	982.3828	655.7775	1.2476	3.271	952	2.573341241	0.005944418	51.88713972	0.119859293
99.79672995	×ÔÉí³µÁ¾	Road 1	150.6658186	64.11516724	-0.007689169	0.826186717	0.631372571	0	167.3651	982.3867	655.7775	1.2492	3.2704	953	1.979940218	0.004573662	51.92018209	0.119935621
99.81340093	×ÔÉí³µÁ¾	Road 1	150.9629721	64.16857452	-0.007603886	0.825598359	0.631372571	0	167.7392	982.3926	655.7775	1.251	3.2695	954	2.574889519	0.005947995	51.963108	0.120034779
99.86344354	×ÔÉí³µÁ¾	Road 1	151.8566213	64.28794785	-0.00751221	0.824658155	0.631372571	0	168.5777	982.4063	655.7775	1.2535	3.2689	955	2.124073797	0.00490661	52.0694022	0.120280319
99.88007456	×ÔÉí³µÁ¾	Road 1	152.1537783	64.32349548	-0.007417791	0.825018227	0.631372571	0	168.8277	982.4102	655.7775	1.2551	3.2682	956	1.988124494	0.004592568	52.10246674	0.120356698
99.89679428	×ÔÉí³µÁ¾	Road 1	152.4527678	64.37679977	-0.007108781	0.824537456	0.631372571	0	169.203	982.417	655.7775	1.256	3.2683	957	2.573654779	0.005945143	52.14549754	0.120456099
99.91342054	×ÔÉí³µÁ¾	Road 1	152.7502498	64.41229248	-0.007001014	0.823856175	0.631372571	0	169.4534	982.4209	655.7774	1.2566	3.2677	958	1.988958169	0.004594493	52.17856646	0.120532489
99.9300314	×ÔÉí³µÁ¾	Road 1	153.0476787	64.46048813	-0.006881085	0.824405849	0.631372571	0	169.7039	982.4248	655.7774	1.2582	3.267	959	2.41705655	0.005583401	52.21871585	0.120625234
99.94673939	×ÔÉí³µÁ¾	Road 1	153.3470117	64.49598083	-0.006782197	0.824333131	0.631372571	0	169.9546	982.4297	655.7774	1.2578	3.2674	960	1.985333408	0.00458612	52.25188679	0.120701858
99.96335868	×ÔÉí³µÁ¾	Road 1	153.6449425	64.53652039	-0.006697264	0.823803663	0.631372571	0	170.3309	982.4365	655.7774	1.2588	3.2674	961	2.161981145	0.004994176	52.28781738	0.120784858
99.98005531	×ÔÉí³µÁ¾	Road 1	153.9444244	64.57199249	-0.006606594	0.823501527	0.631372571	0	170.5819	982.4404	655.7774	1.2594	3.2678	962	1.987438493	0.004590983	52.32100091	0.120861512
99.99676404	×ÔÉí³µÁ¾	Road 1	154.2443936	64.63023376	-0.006519941	0.823748231	0.631372571	0	170.9946	982.4482	655.7774	1.26	3.2681	963	2.748668945	0.006349425	52.36692768	0.120967603
100.0133943	×ÔÉí³µÁ¾	Road 1	154.54313	64.66821899	-0.006465772	0.82328248	0.631372571	0	171.2639	982.4531	655.7774	1.261	3.2681	964	2.079094671	0.004802709	52.40150361	0.121047473
100.0300521	×ÔÉí³µÁ¾	Road 1	154.842524	64.70361557	-0.006408744	0.821952045	0.631372571	0	171.5154	982.457	655.7774	1.2616	3.2675	965	1.99111498	0.004599476	52.43467116	0.12112409
100.0467092	×ÔÉí³µÁ¾	Road 1	155.1420687	64.73903275	-0.00638981	0.823079288	0.631372571	0	171.7671	982.4619	655.7774	1.2623	3.2678	966	1.992784651	0.004603333	52.46786507	0.121200768
100.0633871	×ÔÉí³µÁ¾	Road 1	155.4421766	64.77950363	-0.006380357	0.822541058	0.631372571	0	172.0548	982.4668	655.7774	1.2626	3.2675	967	2.161889165	0.004993964	52.50392092	0.121284057
100.0799913	×ÔÉí³µÁ¾	Road 1	155.741157	64.82246704	-0.006380357	0.822022915	0.631372571	0	172.3608	982.4727	655.7774	1.2632	3.2678	968	2.253192913	0.005204876	52.54133352	0.12137048
100.0966752	×ÔÉí³µÁ¾	Road 1	156.0417804	64.86797104	-0.006380357	0.822283804	0.631372571	0	172.667	982.4785	655.7774	1.2629	3.2682	969	2.332958402	0.005389134	52.58025614	0.121460392
100.1133831	×ÔÉí³µÁ¾	Road 1	156.3430742	64.91847382	-0.006380357	0.820922673	0.631372571	0	173.0454	982.4854	655.7774	1.2639	3.2691	970	2.500052449	0.005775121	52.62202701	0.121556882
100.1300464	×ÔÉí³µÁ¾	Road 1	156.6437252	64.95382233	-0.006380357	0.82202822	0.631372571	0	173.2979	982.4902	655.7774	1.2636	3.2695	971	1.995643978	0.004609938	52.65528097	0.121633699
100.1467834	×ÔÉí³µÁ¾	Road 1	156.9459636	65.00935135	-0.006411904	0.820818126	0.631372571	0	173.695	982.498	655.7774	1.264	3.2701	972	2.66877452	0.006164869	52.69994813	0.12173688
100.1633895	×ÔÉí³µÁ¾	Road 1	157.2460019	65.04465866	-0.006437216	0.821114898	0.631372571	0	173.9478	982.5029	655.7775	1.264	3.2704	973	2.000726951	0.004621679	52.73317239	0.121813628
100.1800396	×ÔÉí³µÁ¾	Road 1	157.5469983	65.07998657	-0.006507168	0.820549071	0.631372571	0	174.2008	982.5078	655.7775	1.2638	3.2697	974	1.999188051	0.004618124	52.76645903	0.12189052
100.1967703	×ÔÉí³µÁ¾	Road 1	157.8497102	65.1354332	-0.006619496	0.819988906	0.631372571	0	174.5986	982.5156	655.7775	1.2632	3.2694	975	2.67129558	0.006170693	52.81115173	0.121993761
100.2133782	×ÔÉí³µÁ¾	Road 1	158.1503746	65.17321243	-0.006795327	0.820218444	0.631372571	0	174.87	982.5215	655.7775	1.2622	3.2703	976	2.087740231	0.00482268	52.84582477	0.122073855
100.2300701	×ÔÉí³µÁ¾	Road 1	158.4527221	65.20845795	-0.007021137	0.819628596	0.631372571	0	175.1235	982.5264	655.7775	1.262	3.2706	977	1.996770135	0.004612539	52.87915459	0.122150847
100.2470698	×ÔÉí³µÁ¾	Road 1	158.7608133	65.24371033	-0.007221067	0.81988728	0.631372571	0	175.3771	982.5313	655.7775	1.2617	3.2699	978	1.976357147	0.004565385	52.91275222	0.122228458
100.2634157	×ÔÉí³µÁ¾	Road 1	159.0573273	65.30411453	-0.007414309	0.819199145	0.631372571	0	175.8122	982.54	655.7775	1.2598	3.2699	979	2.892472442	0.006681611	52.96003211	0.122337674
100.280083	×ÔÉí³µÁ¾	Road 1	159.3598359	65.33933258	-0.007625147	0.819462776	0.631372571	0	176.0662	982.5459	655.7775	1.2586	3.2711	980	2.001002619	0.004622316	52.99338343	0.122414716
100.2968148	×ÔÉí³µÁ¾	Road 1	159.663679	65.37455063	-0.007818285	0.818674266	0.631372571	0	176.3203	982.5508	655.7775	1.2583	3.2714	981	1.997317977	0.004613805	53.0268022	0.122491913
100.313345	×ÔÉí³µÁ¾	Road 1	159.9641148	65.42979813	-0.008010992	0.818038106	0.631372571	0	176.7199	982.5596	655.7775	1.2568	3.272	982	2.697930311	0.006232219	53.07139957	0.122594933
100.3300475	×ÔÉí³µÁ¾	Road 1	160.2678449	65.46497498	-0.008199391	0.817845941	0.631372571	0	176.9743	982.5645	655.7775	1.2565	3.2723	983	2.000361518	0.004620835	53.10481061	0.122672113
100.3467801	×ÔÉí³µÁ¾	Road 1	160.5722967	65.50263062	-0.008334142	0.818094075	0.631372571	0	177.2471	982.5703	655.7775	1.2556	3.2723	984	2.083011027	0.004811755	53.1396647	0.122752625
100.3633777	×ÔÉí³µÁ¾	Road 1	160.8745487	65.55785751	-0.008455154	0.81749934	0.631372571	0	177.6475	982.5791	655.7776	1.2541	3.2728	985	2.694231248	0.006223674	53.18438264	0.122855924
100.3800084	×ÔÉí³µÁ¾	Road 1	161.1775637	65.59297943	-0.00856966	0.817342818	0.631372571	0	177.9025	982.585	655.7776	1.2519	3.2741	986	2.006971594	0.004636104	53.21775989	0.122933025
100.3967017	×ÔÉí³µÁ¾	Road 1	161.4818837	65.62810822	-0.008642713	0.817629158	0.631372571	0	178.1576	982.5908	655.7776	1.2506	3.2743	987	2.003622873	0.004628369	53.25120704	0.123010288
100.4134141	×ÔÉí³µÁ¾	Road 1	161.7868071	65.68325272	-0.008696806	0.816486239	0.631372571	0	178.5587	982.5996	655.7776	1.2491	3.2759	988	2.683055156	0.006197857	53.29604731	0.123113869
100.4300283	×ÔÉí³µÁ¾	Road 1	162.0901117	65.72083969	-0.008751124	0.816710651	0.631372571	0	178.8324	982.6055	655.7776	1.2483	3.2758	989	2.095711956	0.004841095	53.3308658	0.1231943
100.4467487	×ÔÉí³µÁ¾	Road 1	162.3955196	65.75588608	-0.008797863	0.816130936	0.631372571	0	179.088	982.6113	655.7776	1.247	3.2771	990	2.002202148	0.004625087	53.36434354	0.123271634
100.4633827	×ÔÉí³µÁ¾	Road 1	162.6995094	65.79093933	-0.008852601	0.815640152	0.631372571	0	179.3437	982.6172	655.7777	1.2458	3.2773	991	2.009540365	0.004642038	53.39777014	0.123348849
100.4800042	×ÔÉí³µÁ¾	Road 1	163.0035141	65.84348831	-0.0089115	0.81505084	0.631372571	0	179.7276	982.626	655.7777	1.244	3.2782	992	2.610352877	0.006029915	53.44115809	0.123449075
100.4967741	×ÔÉí³µÁ¾	Road 1	163.3103969	65.87846603	-0.008978568	0.814924479	0.639215708	0	179.9836	982.6318	655.7778	1.2428	3.2794	993	1.999525794	0.004618905	53.47469002	0.123526534
100.5133582	×ÔÉí³µÁ¾	Road 1	163.6141327	65.93356247	-0.00906586	0.816428959	0.639215708	0	180.3863	982.6416	655.7778	1.2394	3.2809	994	2.705028052	0.006248615	53.51955048	0.123630162
100.5300889	×ÔÉí³µÁ¾	Road 1	163.9207175	65.96878052	-0.00918982	0.820680678	0.639215708	0	180.6427	982.6475	655.7778	1.2382	3.2812	995	2.012827716	0.004649632	53.55322654	0.123707953
100.5467064	×ÔÉí³µÁ¾	Road 1	164.2253898	66.00410156	-0.009339245	0.822350442	0.639215708	0	180.8992	982.6533	655.7778	1.237	3.2824	996	2.0254604	0.004678814	53.58688454	0.123785703
100.5633638	×ÔÉí³µÁ¾	Road 1	164.5310402	66.05716553	-0.009486178	0.82287693	0.639215708	0	181.2843	982.6631	655.7778	1.2342	3.2842	997	2.631597116	0.006078989	53.63072013	0.123886964
100.5800755	×ÔÉí³µÁ¾	Road 1	164.8378503	66.09255524	-0.009684474	0.823142707	0.639215708	0	181.5412	982.6689	655.7779	1.233	3.2854	998	2.02327689	0.00467377	53.66453245	0.12396507
100.5967039	×ÔÉí³µÁ¾	Road 1	165.1432964	66.12797928	-0.009830794	0.823339462	0.639215708	0	181.7982	982.6758	655.7779	1.2308	3.2866	999	2.031434138	0.004692613	53.69831206	0.124043101
100.6133595	×ÔÉí³µÁ¾	Road 1	165.4494984	66.18365936	-0.009974338	0.823677897	0.639215708	0	182.2024	982.6855	655.778	1.2274	3.2881	1000	2.726028259	0.006297125	53.74371564	0.124147983
100.6300998	×ÔÉí³µÁ¾	Road 1	165.757422	66.2191246	-0.010097872	0.82419312	0.639215708	0	182.4598	982.6924	655.778	1.2252	3.2893	1001	2.02708904	0.004682576	53.77764962	0.124226371
100.6467726	×ÔÉí³µÁ¾	Road 1	166.064269	66.25454865	-0.010179357	0.823811591	0.639215708	0	182.7173	982.6982	655.778	1.2241	3.2905	1002	2.031504774	0.004692776	53.81152051	0.124304612
100.6633743	×ÔÉí³µÁ¾	Road 1	166.3699824	66.29253387	-0.010239679	0.824734509	0.639215708	0	182.9933	982.7061	655.7781	1.2213	3.2923	1003	2.126043744	0.004911161	53.84681644	0.124386146
100.6799935	×ÔÉí³µÁ¾	Road 1	166.6762771	66.34824829	-0.010243997	0.823903203	0.639215708	0	183.3985	982.7158	655.7781	1.2189	3.2938	1004	2.73743066	0.006323465	53.89231059	0.124491237
100.6966916	×ÔÉí³µÁ¾	Road 1	166.9841886	66.38368607	-0.010243997	0.823827088	0.639215708	0	183.6565	982.7227	655.7781	1.2167	3.2959	1005	2.033506123	0.004697399	53.92626627	0.124569675
100.7133941	×ÔÉí³µÁ¾	Road 1	167.2923574	66.42166443	-0.010243997	0.824124932	0.639215708	0	183.9146	982.7295	655.7781	1.2136	3.2971	1006	2.121441413	0.00490053	53.96169964	0.124651526
100.7299947	×ÔÉí³µÁ¾	Road 1	167.5989028	66.47735138	-0.01020518	0.823984981	0.639215708	0	184.339	982.7412	655.7782	1.2096	3.3001	1007	2.743393308	0.006337239	54.00724161	0.124756728
100.7467541	×ÔÉí³µÁ¾	Road 1	167.9085441	66.51278915	-0.010119272	0.823724329	0.639215708	0	184.5975	982.748	655.7783	1.2074	3.3012	1008	2.032423542	0.004694898	54.04130363	0.124835411
100.7634074	×ÔÉí³µÁ¾	Road 1	168.216474	66.56592178	-0.009991317	0.823796809	0.639215708	0	184.9855	982.7588	655.7783	1.2037	3.304	1009	2.65237366	0.006126983	54.08547461	0.124937446
100.7800505	×ÔÉí³µÁ¾	Road 1	168.5243896	66.60387955	-0.009813998	0.823920786	0.639215708	0	185.2629	982.7656	655.7783	1.2019	3.3058	1010	2.130395567	0.004921214	54.12093103	0.125019351
100.7967314	×ÔÉí³µÁ¾	Road 1	168.8331678	66.63929672	-0.009634644	0.823101819	0.639215708	0	185.5219	982.7734	655.7784	1.1988	3.3079	1011	2.04073341	0.004714094	54.15497224	0.125097986
100.8133393	×ÔÉí³µÁ¾	Road 1	169.1408407	66.69241562	-0.00943703	0.82383436	0.639215708	0	185.9106	982.7842	655.7784	1.1941	3.3106	1012	2.661399645	0.006147833	54.19917257	0.125200089
100.8300822	×ÔÉí³µÁ¾	Road 1	169.4511775	66.72784653	-0.009181788	0.823830605	0.639215708	0	186.17	982.791	655.7785	1.192	3.3127	1013	2.038990695	0.004710069	54.23331102	0.125278948
100.8468371	×ÔÉí³µÁ¾	Road 1	169.7619032	66.76324997	-0.008946965	0.822989464	0.639215708	0	186.4294	982.7988	655.7785	1.1889	3.3148	1014	2.038086958	0.004707981	54.267459	0.12535783
100.863408	×ÔÉí³µÁ¾	Road 1	170.0694724	66.81888199	-0.008673595	0.823365867	0.639215708	0	186.8374	982.8105	655.7786	1.1846	3.3181	1015	2.757507183	0.006369842	54.31315338	0.125463384
100.8799888	×ÔÉí³µÁ¾	Road 1	170.3773884	66.85427856	-0.008349204	0.822970867	0.639215708	0	187.0973	982.8174	655.7786	1.1825	3.3193	1016	2.053034261	0.004742509	54.34719433	0.125542019
100.8966982	×ÔÉí³µÁ¾	Road 1	170.687858	66.88968201	-0.008047703	0.824229479	0.639215708	0	187.3572	982.8252	655.7784	1.1784	3.3224	1017	2.044700748	0.004723259	54.38136018	0.125620942
100.913415	×ÔÉí³µÁ¾	Road 1	170.9986755	66.9352684	-0.007753548	0.824647903	0.639215708	0	187.6173	982.833	655.7783	1.1753	3.3245	1018	2.39750127	0.005538228	54.42143872	0.125713523
100.9300878	×ÔÉí³µÁ¾	Road 1	171.3088864	66.98088226	-0.007417791	0.825804293	0.639215708	0	188.0263	982.8447	655.7779	1.171	3.3278	1019	2.404046962	0.005553348	54.46152093	0.125806113
100.9467295	×ÔÉí³µÁ¾	Road 1	171.6186819	67.01642303	-0.007135894	0.827149391	0.639215708	0	188.2867	982.8525	655.7776	1.168	3.3299	1020	2.057782855	0.004753478	54.49576583	0.125885219
100.9633792	×ÔÉí³µÁ¾	Road 1	171.9288747	67.06985779	-0.006854622	0.830473185	0.639215708	0	188.6777	982.8643	655.7769	1.1633	3.3345	1021	2.681104072	0.00619335	54.54040544	0.125988337
100.9967776	×ÔÉí³µÁ¾	Road 1	172.5516498	67.12868271	-0.006551946	0.832335472	0.639215708	0	189.1062	982.877	655.776	1.1574	3.3384	1022	1.843443049	0.004258353	54.60197349	0.126130559
101.0133951	×ÔÉí³µÁ¾	Road 1	172.8618331	67.19800644	-0.00629882	0.837556899	0.639215708	0	189.6097	982.8916	655.7747	1.1519	3.342	1023	3.24402982	0.007493709	54.65588101	0.126255085
101.0300532	×ÔÉí³µÁ¾	Road 1	173.1729432	67.23415833	-0.005794556	0.840102196	0.639215708	0	189.871	982.8994	655.7739	1.1488	3.345	1024	2.083570819	0.004813049	54.69058943	0.126335262
101.0466934	×ÔÉí³µÁ¾	Road 1	173.4838855	67.27042694	-0.005564336	0.842623651	0.639215708	0	190.1324	982.9072	655.7731	1.1458	3.3471	1025	2.089970512	0.004827832	54.72536692	0.126415598
101.06332	×ÔÉí³µÁ¾	Road 1	173.7948385	67.32762451	-0.005351493	0.845576108	0.639215708	0	190.5435	982.9199	655.7717	1.1405	3.3523	1026	2.824421167	0.006524413	54.7723275	0.126524077
101.0799741	×ÔÉí³µÁ¾	Road 1	174.1064746	67.36414032	-0.005135967	0.848849475	0.639215708	0	190.8053	982.9277	655.7706	1.1375	3.3544	1027	2.100039765	0.004851092	54.8073018	0.126604867
101.0966737	×ÔÉí³µÁ¾	Road 1	174.4191315	67.40084152	-0.004950203	0.851474047	0.639215708	0	191.0672	982.9365	655.7696	1.1334	3.3584	1028	2.10400846	0.00486026	54.84243783	0.126686031
101.1133564	×ÔÉí³µÁ¾	Road 1	174.7317407	67.45867767	-0.004766378	0.854647398	0.639215708	0	191.479	982.9492	655.7678	1.1273	3.3627	1029	2.844893575	0.006571704	54.88989834	0.126795665
101.1301428	×ÔÉí³µÁ¾	Road 1	175.0464659	67.49560547	-0.004561932	0.857535422	0.639215708	0	191.7413	982.957	655.7664	1.1242	3.3657	1030	2.107782226	0.004868977	54.9252805	0.126877398
101.1467207	×ÔÉí³µÁ¾	Road 1	175.3574516	67.53271179	-0.004392821	0.859542668	0.639215708	0	192.0038	982.9648	655.7651	1.1211	3.3678	1031	2.131206127	0.004923086	54.96061136	0.126959012
101.1633865	×ÔÉí³µÁ¾	Road 1	175.670346	67.58853607	-0.004227941	0.863475204	0.639215708	0	192.3977	982.9775	655.763	1.1156	3.3733	1032	2.78139	0.006425011	55.00696556	0.12706609
101.1799772	×ÔÉí³µÁ¾	Road 1	175.9820016	67.62586899	-0.004048605	0.866171896	0.639215708	0	192.6605	982.9863	655.7615	1.1116	3.3763	1033	2.140698915	0.004945014	55.04248125	0.127148132
101.1967461	×ÔÉí³µÁ¾	Road 1	176.2971785	67.66339417	-0.003903848	0.868360579	0.639215708	0	192.9234	982.9941	655.7599	1.1085	3.3794	1034	2.13444624	0.004930571	55.07827345	0.127230812
101.2133844	×ÔÉí³µÁ¾	Road 1	176.610176	67.72251434	-0.003767015	0.871687829	0.639215708	0	193.3369	983.0068	655.7573	1.1034	3.3836	1035	2.905383505	0.006711436	55.12661424	0.127342479
101.2300858	×ÔÉí³µÁ¾	Road 1	176.9245346	67.76024551	-0.003646415	0.874377072	0.639215708	0	193.6003	983.0156	655.7555	1.0993	3.3876	1036	2.149581497	0.004965533	55.16251525	0.12742541
101.2466963	×ÔÉí³µÁ¾	Road 1	177.237357	67.79814835	-0.003553942	0.876969218	0.639215708	0	193.8637	983.0234	655.7536	1.0963	3.3906	1037	2.163910159	0.004998632	55.19845886	0.12750844
101.26364	×ÔÉí³µÁ¾	Road 1	177.5567358	67.8579277	-0.003463046	0.880281985	0.639215708	0	194.278	983.0371	655.7506	1.0892	3.3958	1038	2.895855085	0.006689425	55.24752534	0.127621784
101.2799866	×ÔÉí³µÁ¾	Road 1	177.8650325	67.89607773	-0.003369595	0.882937074	0.639215708	0	194.5419	983.0459	655.7486	1.0852	3.3998	1039	2.197081775	0.005075259	55.28344009	0.127704747
101.2967188	×ÔÉí³µÁ¾	Road 1	178.1808693	67.95359802	-0.003281884	0.885813832	0.639215708	0	194.9379	983.0586	655.7454	1.0797	3.4043	1040	2.846476026	0.00657536	55.33106787	0.127814767
101.363403	×ÔÉí³µÁ¾	Road 1	179.4428106	68.12685242	-0.00320565	0.89717406	0.639215708	0	196.128	983.0967	655.7349	1.0632	3.4198	1041	2.357581144	0.005446012	55.48828142	0.12817793
101.3800245	×ÔÉí³µÁ¾	Road 1	179.7575377	68.16582642	-0.003113005	0.899560034	0.639215708	0	196.3929	983.1055	655.7324	1.0592	3.4238	1042	2.211073489	0.00510758	55.52503276	0.128262826
101.3967021	×ÔÉí³µÁ¾	Road 1	180.0735985	68.22449341	-0.002740502	0.904003561	0.639215708	0	196.7905	983.1182	655.7285	1.0537	3.4292	1043	2.903769928	0.006707709	55.57346059	0.128374694
101.4133368	×ÔÉí³µÁ¾	Road 1	180.3890281	68.26379013	-0.002636074	0.905982375	0.639215708	0	197.0558	983.127	655.7257	1.0498	3.4322	1044	2.224162048	0.005137814	55.61045882	0.12846016
101.4300613	×ÔÉí³µÁ¾	Road 1	180.7064353	68.32290344	-0.002522439	0.908851206	0.639215708	0	197.454	983.1396	655.7216	1.0441	3.4377	1045	2.91744598	0.0067393	55.65925162	0.128572871
101.4670424	×ÔÉí³µÁ¾	Road 1	181.4093593	68.42752762	-0.002422011	0.916055441	0.639215708	0	198.1564	983.1631	655.7137	1.033	3.4474	1046	2.503934946	0.00578409	55.75184993	0.128786773
101.483092	×ÔÉí³µÁ¾	Road 1	181.7146033	68.46739426	-0.00231466	0.917829692	0.639215708	0	198.4225	983.1719	655.7106	1.0289	3.4514	1047	2.301836477	0.005317242	55.78879363	0.128872113
101.4982931	×ÔÉí³µÁ¾	Road 1	182.0038771	68.50733643	-0.002055816	0.921050429	0.639215708	0	198.6887	983.1797	655.7075	1.0258	3.4543	1048	2.38801455	0.005516314	55.82509404	0.128955967
101.5139561	×ÔÉí³µÁ¾	Road 1	182.3021271	68.55032043	-0.001948212	0.923509121	0.639215708	0	198.9741	983.1895	655.704	1.0204	3.4589	1049	2.458417912	0.005678945	55.8636001	0.129044916
101.5300046	×ÔÉí³µÁ¾	Road 1	182.6078991	68.59053726	-0.001863774	0.925937295	0.639215708	0	199.2406	983.1982	655.7007	1.0165	3.4629	1050	2.318465316	0.005355655	55.90080813	0.129130867
101.5467504	×ÔÉí³µÁ¾	Road 1	182.9272362	68.65105133	-0.001776435	0.929794729	0.639215708	0	199.6407	983.2119	655.6956	1.0102	3.4683	1051	2.976944287	0.006876741	55.9506593	0.129246023
101.5640082	×ÔÉí³µÁ¾	Road 1	183.2565465	68.69444733	-0.001689269	0.932267725	0.639215708	0	199.9268	983.2207	655.6918	1.0067	3.4719	1052	2.326606603	0.005374461	55.99081148	0.129338775
101.5800483	×ÔÉí³µÁ¾	Road 1	183.562802	68.73507614	-0.001612545	0.934265077	0.639215708	0	200.1939	983.2295	655.6882	1.0029	3.4758	1053	2.338749814	0.005402512	56.02832533	0.129425432
101.596745	×ÔÉí³µÁ¾	Road 1	183.8818756	68.79620819	-0.001565175	0.938139975	0.639215708	0	200.5948	983.2432	655.6826	0.9966	3.4822	1054	3.010909758	0.006955202	56.07859739	0.12954156
101.6138562	×ÔÉí³µÁ¾	Road 1	184.2090804	68.84009857	-0.001529655	0.940538824	0.639215708	0	200.8814	983.2529	655.6786	0.9921	3.4868	1055	2.360896687	0.005453671	56.11899518	0.129634879
101.6299762	×ÔÉí³µÁ¾	Road 1	184.5175155	68.88113937	-0.001499469	0.94227773	0.639215708	0	201.1491	983.2617	655.6748	0.9881	3.4907	1056	2.350815591	0.005430384	56.15689042	0.129722417
101.6467322	×ÔÉí³µÁ¾	Road 1	184.8384201	68.94578018	-0.001473237	0.947253168	0.639215708	0	201.5701	983.2754	655.6686	0.9821	3.4957	1057	3.133732254	0.007238922	56.20939929	0.129843712
101.6633086	×ÔÉí³µÁ¾	Road 1	185.1560753	68.98715057	-0.001453177	0.948835433	0.639215708	0	201.8381	983.2842	655.6645	0.9781	3.4996	1058	2.32404403	0.005368542	56.24792357	0.129932703
101.6800346	×ÔÉí³µÁ¾	Road 1	185.4767891	69.02860336	-0.001429811	0.95162344	0.639215708	0	202.1064	983.293	655.6604	0.9742	3.5035	1059	2.314889251	0.005347394	56.28664231	0.130022144
101.696773	×ÔÉí³µÁ¾	Road 1	185.7979489	69.07313919	-0.0014113	0.953587353	0.639215708	0	202.394	983.3027	655.6559	0.9696	3.508	1060	2.424967716	0.005601675	56.32723244	0.130115907
101.713367	×ÔÉí³µÁ¾	Road 1	186.1166672	69.14463959	-0.001387248	0.958176017	0.631372571	0	202.8545	983.3184	655.6485	0.9624	3.5153	1061	3.411174368	0.007879813	56.38383746	0.130246665
101.7299933	×ÔÉí³µÁ¾	Road 1	186.4361981	69.1864357	-0.001353363	0.957327783	0.631372571	0	203.1234	983.3271	655.644	0.9584	3.5193	1062	2.340719738	0.005407063	56.42275486	0.130336564
101.7467079	×ÔÉí³µÁ¾	Road 1	186.7576344	69.23115692	-0.001316733	0.956445694	0.623529434	0	203.4116	983.3369	655.6393	0.9539	3.5239	1063	2.438730448	0.005633467	56.46351725	0.130430725
101.7637791	×ÔÉí³µÁ¾	Road 1	187.0862397	69.29655991	-0.001272151	0.95286411	0.615686297	0	203.8347	983.3516	655.6321	0.9469	3.5299	1064	3.132225715	0.007235441	56.51698826	0.130554243
101.780111	×ÔÉí³µÁ¾	Road 1	187.400801	69.33793716	-0.001205626	0.947909892	0.607843161	0	204.1042	983.3604	655.6273	0.943	3.5339	1065	2.356971145	0.005444603	56.5554821	0.130643164
101.8133918	×ÔÉí³µÁ¾	Road 1	188.0425642	69.41996384	-0.001132486	0.937205911	0.600000024	0	204.6436	983.3779	655.6177	0.9352	3.5417	1066	2.317689843	0.005353864	56.63261652	0.130821344
101.8301115	×ÔÉí³µÁ¾	Road 1	188.3652715	69.48358841	-0.00105381	0.93034935	0.592156887	0	205.0678	983.3926	655.61	0.9282	3.5487	1067	3.124406925	0.00721738	56.68485575	0.130942017
101.8469188	×ÔÉí³µÁ¾	Road 1	188.6898578	69.52384644	-0.000862	0.926003933	0.58431375	0	205.338	983.4014	655.605	0.9243	3.5526	1068	2.279455916	0.005265543	56.72316732	0.131030517
101.8633706	×ÔÉí³µÁ¾	Road 1	189.0078643	69.58662643	-0.000757108	0.921247125	0.58431375	0	205.7629	983.416	655.5968	0.9174	3.5595	1069	3.135007636	0.007241868	56.77474375	0.131149658
101.8800082	×ÔÉí³µÁ¾	Road 1	189.3296458	69.62617035	-0.000637069	0.913911641	0.58431375	0	206.0335	983.4248	655.5916	0.9135	3.5634	1070	2.271255986	0.005246601	56.81253204	0.131236949
101.8967158	×ÔÉí³µÁ¾	Road 1	189.6529646	69.6656456	-0.000532242	0.912668228	0.58431375	0	206.3042	983.4336	655.5862	0.9096	3.5673	1071	2.263906417	0.005229624	56.85035655	0.131324324
101.9132963	×ÔÉí³µÁ¾	Road 1	189.9740945	69.72479324	-0.0004359	0.913713992	0.58431375	0	206.7106	983.4473	655.5781	0.9033	3.5736	1072	2.990913778	0.006909011	56.8999472	0.131438878
101.93009	×ÔÉí³µÁ¾	Road 1	190.2995402	69.76423416	-0.000342899	0.913899481	0.58431375	0	206.9818	983.457	655.5726	0.8984	3.5775	1073	2.258149858	0.005216326	56.93787005	0.13152648
101.9467064	×ÔÉí³µÁ¾	Road 1	190.6217301	69.80373688	-0.000267954	0.914830327	0.58431375	0	207.2531	983.4658	655.567	0.8945	3.5814	1074	2.276623408	0.005259	56.97569924	0.131613865
101.9632725	×ÔÉí³µÁ¾	Road 1	190.9432193	69.86304932	-0.000203225	0.916875839	0.58431375	0	207.6603	983.4795	655.5585	0.8882	3.5877	1075	3.004110042	0.006939494	57.02546574	0.131728826
101.9799699	×ÔÉí³µÁ¾	Road 1	191.2674388	69.90265503	-0.000142996	0.918899357	0.58431375	0	207.9319	983.4893	655.5527	0.8834	3.5925	1076	2.276183646	0.005257984	57.06347201	0.13181662
101.9966808	×ÔÉí³µÁ¾	Road 1	191.5921063	69.942453	-9.85E-05	0.920035541	0.58431375	0	208.2038	983.498	655.5468	0.8795	3.5964	1077	2.283095911	0.005273952	57.10162466	0.131904753
102.0132983	×ÔÉí³µÁ¾	Road 1	191.9152601	70.00791092	-6.35E-05	0.924557745	0.58431375	0	208.6507	983.5127	655.537	0.873	3.6029	1078	3.226576871	0.007453393	57.15524216	0.132028609
102.0299608	×ÔÉí³µÁ¾	Road 1	192.2394755	70.04787369	-3.75E-05	0.925541162	0.58431375	0	208.9229	983.5225	655.5309	0.8681	3.6078	1079	2.296254375	0.005304348	57.1935036	0.132116993
102.0493744	×ÔÉí³µÁ¾	Road 1	192.6175746	70.11375046	-1.74E-05	0.929684401	0.58431375	0	209.3705	983.5371	655.5208	0.8616	3.6143	1080	2.90046039	0.006700064	57.24981182	0.132247065
102.0653177	×ÔÉí³µÁ¾	Road 1	192.9282666	70.15404282	-7.09E-06	0.932039797	0.58431375	0	209.6432	983.5469	655.5145	0.8568	3.6191	1081	2.377378249	0.005491744	57.28771522	0.132334622
102.0805786	×ÔÉí³µÁ¾	Road 1	193.2258291	70.19440384	-1.41E-06	0.935087502	0.58431375	0	209.916	983.5557	655.5081	0.8529	3.623	1082	2.44984649	0.005659145	57.32510192	0.132420985
102.0967532	×ÔÉí³µÁ¾	Road 1	193.5413919	70.23495712	-1.36E-07	0.936824322	0.58431375	0	210.189	983.5645	655.5016	0.8491	3.6268	1083	2.36763156	0.005469229	57.36339754	0.132509448
102.1136573	×ÔÉí³µÁ¾	Road 1	193.8714859	70.29879456	2.59E-12	0.940714955	0.58431375	0	210.6183	983.5791	655.4913	0.8423	3.6337	1084	3.139994835	0.007253388	57.41647634	0.13263206
102.1299962	×ÔÉí³µÁ¾	Road 1	194.1907274	70.3395813	2.03E-07	0.943314135	0.58431375	0	210.8916	983.5889	655.4847	0.8375	3.6385	1085	2.364079331	0.005461023	57.45510274	0.132721287
102.1467031	×ÔÉí³µÁ¾	Road 1	194.517363	70.38340988	1.22E-06	0.945321798	0.58431375	0	211.1847	983.5986	655.4775	0.833	3.643	1086	2.44260667	0.005642421	57.49591111	0.132815555
102.1633492	×ÔÉí³µÁ¾	Road 1	194.8430659	70.43896637	3.76E-06	0.94829607	0.58431375	0	211.4585	983.6074	655.4706	0.8292	3.6468	1087	2.878710925	0.006649822	57.54383027	0.132926248
102.1802357	×ÔÉí³µÁ¾	Road 1	195.173709	70.48911209	8.64E-06	0.951385617	0.576470613	0	211.8889	983.6221	655.4598	0.8224	3.6537	1088	2.656565675	0.006136667	57.58869039	0.133029875
102.1967175	×ÔÉí³µÁ¾	Road 1	195.4966171	70.53033829	1.44E-05	0.950908899	0.576470613	0	212.163	983.6318	655.4528	0.8176	3.6585	1089	2.372726843	0.005480999	57.62779727	0.133120212
102.2138994	×ÔÉí³µÁ¾	Road 1	195.8334523	70.57444153	2.20E-05	0.951041937	0.576470613	0	212.4569	983.6416	655.4451	0.8132	3.6629	1090	2.41394255	0.005576207	57.66927352	0.133216022
102.2300558	×ÔÉí³µÁ¾	Road 1	196.1504715	70.6391304	3.26E-05	0.952107489	0.576470613	0	212.8883	983.6563	655.4338	0.8064	3.6697	1091	3.292544274	0.007605777	57.72246895	0.133338903
102.2466674	×ÔÉí³µÁ¾	Road 1	196.4766143	70.68041153	4.37E-05	0.954100966	0.576470613	0	213.163	983.665	655.4265	0.8026	3.6736	1092	2.36722555	0.005468291	57.76179233	0.13342974
102.2633438	×ÔÉí³µÁ¾	Road 1	196.8042227	70.72181625	5.65E-05	0.955614746	0.576470613	0	213.4379	983.6748	655.4191	0.7978	3.6783	1093	2.367056517	0.005467901	57.80126648	0.133520926
102.2818527	×ÔÉí³µÁ¾	Road 1	197.168164	70.78701324	6.94E-05	0.95870471	0.576470613	0	213.8702	983.6885	655.4072	0.792	3.6841	1094	3.004407603	0.006940182	57.85687472	0.133649381
102.296629	×ÔÉí³µÁ¾	Road 1	197.4588808	70.8285759	8.20E-05	0.960498273	0.576470613	0	214.1455	983.6982	655.3997	0.7872	3.6889	1095	2.572096558	0.005941543	57.89488065	0.133737174
102.3141353	×ÔÉí³µÁ¾	Road 1	197.8035139	70.87021408	9.06E-05	0.963466346	0.576470613	0	214.421	983.708	655.3919	0.7825	3.6937	1096	2.307493858	0.005330311	57.93527646	0.133830489
102.3302873	×ÔÉí³µÁ¾	Road 1	198.1217788	70.93600845	9.39E-05	0.967386246	0.576470613	0	214.8542	983.7217	655.3796	0.7767	3.6995	1097	3.347713323	0.007733218	57.98934849	0.133955395
102.3467097	×ÔÉí³µÁ¾	Road 1	198.4455655	70.97798996	9.82E-05	0.968948364	0.576470613	0	215.1301	983.7314	655.3717	0.7719	3.7042	1098	2.419626173	0.005589336	58.02908468	0.134047186
102.3632421	×ÔÉí³µÁ¾	Road 1	198.7717137	71.02008133	0.0001015	0.971512079	0.576470613	0	215.4062	983.7412	655.3638	0.7672	3.709	1099	2.414526556	0.005577556	58.06900263	0.134139396
102.3799446	×ÔÉí³µÁ¾	Road 1	199.1014276	71.0654068	0.000103304	0.973248184	0.576470613	0	215.7021	983.751	655.3551	0.7628	3.7134	1100	2.518802493	0.005818434	58.11107293	0.134236578
102.3966178	×ÔÉí³µÁ¾	Road 1	199.4308703	71.13186035	0.000103707	0.977612436	0.576470613	0	216.1366	983.7656	655.3422	0.756	3.7201	1101	3.302165665	0.007628003	58.16613051	0.134363761
102.4133133	×ÔÉí³µÁ¾	Road 1	199.7609661	71.17741928	0.000103707	0.98017472	0.576470613	0	216.433	983.7754	655.3334	0.7516	3.7245	1102	2.531592538	0.005847979	58.20839679	0.134461397
102.4299825	×ÔÉí³µÁ¾	Road 1	200.0907374	71.2200325	0.000103707	0.983186781	0.576470613	0	216.7099	983.7852	655.325	0.7469	3.7292	1103	2.42688888	0.005606113	58.24885095	0.134554846
102.4465922	×ÔÉí³µÁ¾	Road 1	200.4196299	71.28417206	0.000103707	0.986685336	0.576470613	0	217.1254	983.7988	655.3123	0.7408	3.7354	1104	3.232221553	0.007466432	58.30253737	0.134678861
102.4632423	×ÔÉí³µÁ¾	Road 1	200.7495196	71.32716293	0.000103707	0.988790274	0.576470613	0	217.4027	983.8076	655.3036	0.737	3.7391	1105	2.445865201	0.005649949	58.34326122	0.134772933
102.4799221	×ÔÉí³µÁ¾	Road 1	201.0802966	71.39170761	0.000103707	0.992514074	0.576470613	0	217.8189	983.8223	655.2905	0.7299	3.7462	1106	3.241622333	0.007488148	58.39733074	0.134897834
102.4966425	×ÔÉí³µÁ¾	Road 1	201.412081	71.43486328	0.000103707	0.993814051	0.576470613	0	218.0966	983.8311	655.2817	0.7262	3.7499	1107	2.448479545	0.005655988	58.43827044	0.134992405
102.5132992	×ÔÉí³µÁ¾	Road 1	201.7428007	71.47828674	0.000103707	0.997641742	0.576470613	0	218.3745	983.8408	655.2729	0.7215	3.7546	1108	2.46581395	0.00569603	58.47934271	0.135087282
102.5299731	×ÔÉí³µÁ¾	Road 1	202.0741788	71.5466011	0.000103707	1.001358986	0.576470613	0	218.8115	983.8555	655.2588	0.7148	3.7614	1109	3.388506221	0.007827449	58.53584234	0.135217796
102.5466324	×ÔÉí³µÁ¾	Road 1	202.4054675	71.59024429	0.000103707	1.002834558	0.576470613	0	219.0898	983.8652	655.2496	0.7101	3.7661	1110	2.477113832	0.005722133	58.57710918	0.135313122
102.5633059	×ÔÉí³µÁ¾	Road 1	202.7372429	71.63394241	0.000103707	1.006486654	0.576470613	0	219.3683	983.874	655.2405	0.7063	3.7698	1111	2.479091223	0.005726701	58.61844441	0.135408607
102.5799996	×ÔÉí³µÁ¾	Road 1	203.0697251	71.69986725	0.000103707	1.010776877	0.576470613	0	219.7863	983.8887	655.2264	0.6993	3.7768	1112	3.303506027	0.007631099	58.67359215	0.135535998
102.5967091	×ÔÉí³µÁ¾	Road 1	203.4027254	71.74383316	0.000103707	1.013183236	0.576470613	0	220.0652	983.8975	655.217	0.6955	3.7806	1113	2.488872999	0.005749297	58.71517988	0.135632066
102.6132836	×ÔÉí³µÁ¾	Road 1	203.7333427	71.81014938	0.000103707	1.015278339	0.576470613	0	220.4839	983.9121	655.2028	0.6884	3.7876	1114	3.340374927	0.007716266	58.77054515	0.135759959
102.6298982	×ÔÉí³µÁ¾	Road 1	204.0649618	71.85453415	0.000103707	1.01918447	0.576470613	0	220.7633	983.9209	655.1932	0.6847	3.7913	1115	2.517229585	0.0058148	58.81236773	0.135856569
102.6467711	×ÔÉí³µÁ¾	Road 1	204.4019469	71.89889145	0.000103707	1.021580458	0.576470613	0	221.0428	983.9307	655.1835	0.68	3.796	1116	2.492173083	0.00575692	58.85441803	0.135953706
102.6633251	×ÔÉí³µÁ¾	Road 1	204.732871	71.96592178	0.000102499	1.025380135	0.576470613	0	221.4624	983.9453	655.1688	0.6729	3.803	1117	3.376860844	0.007800549	58.91031872	0.136082836
102.6966649	×ÔÉí³µÁ¾	Road 1	205.3999722	72.03306198	0.000100309	1.02888155	0.576470613	0	221.8824	983.959	655.1539	0.6668	3.8091	1118	2.113290859	0.004881702	58.98077531	0.136245591
102.7152453	×ÔÉí³µÁ¾	Road 1	205.7721975	72.11974411	9.74E-05	1.033794522	0.576470613	0	222.423	983.9775	655.1344	0.658	3.8178	1119	3.766836672	0.008701393	59.05076451	0.136407266
102.7299445	×ÔÉí³µÁ¾	Road 1	206.0668563	72.16494598	9.37E-05	1.03657043	0.576470613	0	222.7036	983.9863	655.1242	0.6543	3.8215	1120	2.778467821	0.006418261	59.09160595	0.13650161
102.7466331	×ÔÉí³µÁ¾	Road 1	206.401602	72.21018219	9.34E-05	1.039173603	0.576470613	0	222.9843	983.9961	655.1139	0.6496	3.8262	1121	2.552630434	0.005896576	59.1342057	0.136600015
102.7632718	×ÔÉí³µÁ¾	Road 1	206.7356926	72.28477249	9.34E-05	1.043441892	0.576470613	0	223.446	984.0117	655.0968	0.6423	3.8334	1122	3.661184889	0.008457337	59.19512312	0.136740734
102.7799193	×ÔÉí³µÁ¾	Road 1	207.0701711	72.33047562	9.82E-05	1.045574546	0.576470613	0	223.7272	984.0215	655.0862	0.6377	3.8381	1123	2.578081801	0.005955369	59.23804177	0.136839876
102.7970225	×ÔÉí³µÁ¾	Road 1	207.4141292	72.39893417	0.000108842	1.049647331	0.576470613	0	224.1494	984.0352	655.0703	0.6316	3.8441	1124	3.366280174	0.007776107	59.29561574	0.136972872
102.8133261	×ÔÉí³µÁ¾	Road 1	207.7422178	72.44490509	0.000121851	1.052406549	0.576470613	0	224.431	984.0449	655.0596	0.6269	3.8487	1125	2.628199265	0.00607114	59.33846508	0.137071854
102.8299924	×ÔÉí³µÁ¾	Road 1	208.0778297	72.49415817	0.000139027	1.05480969	0.576470613	0	224.733	984.0547	655.0479	0.6226	3.853	1126	2.71466727	0.006270881	59.38370829	0.137176366
102.8469338	×ÔÉí³µÁ¾	Road 1	208.4193106	72.56333771	0.000156148	1.058621764	0.576470613	0	225.1562	984.0693	655.0315	0.6156	3.8599	1127	3.423846431	0.007909085	59.44171335	0.137310358
102.8967243	×ÔÉí³µÁ¾	Road 1	209.4247384	72.6955101	0.000176917	1.06054461	0.576470613	0	225.9027	984.0947	655.0021	0.6037	3.8718	1128	2.531584367	0.00584796	59.56776201	0.13760153
102.9132486	×ÔÉí³µÁ¾	Road 1	209.7588172	72.78250809	0.000202909	1.072288394	0.58431375	0	226.4888	984.1143	654.9785	0.5948	3.8807	1129	4.175607484	0.009645653	59.63676121	0.137760918
102.929946	×ÔÉí³µÁ¾	Road 1	210.0966119	72.82950897	0.000291038	1.077772975	0.58431375	0	226.772	984.124	654.967	0.5901	3.8853	1130	2.637532307	0.0060927	59.68080105	0.13786265
102.9466272	×ÔÉí³µÁ¾	Road 1	210.4342997	72.87685318	0.000333566	1.083341479	0.58431375	0	227.0553	984.1328	654.9554	0.5865	3.8889	1131	2.653719499	0.006130092	59.72506838	0.137964908
103.0299968	×ÔÉí³µÁ¾	Road 1	212.1283094	73.14944458	0.000387298	1.101794004	0.58431375	0	228.6783	984.1875	654.8876	0.5611	3.9141	1132	2.932033542	0.006772997	59.96951064	0.13852957
103.04759	×ÔÉí³µÁ¾	Road 1	212.4861971	73.23248749	0.000449729	1.106835604	0.58431375	0	229.1664	984.2041	654.8666	0.5533	3.9218	1133	3.855157627	0.008905414	60.03733531	0.138686245
103.0632423	×ÔÉí³µÁ¾	Road 1	212.8048138	73.28117752	0.000787157	1.109208226	0.58431375	0	229.4514	984.2139	654.8543	0.5487	3.9264	1134	2.839313638	0.006558815	60.08177714	0.138788905
103.080495	×ÔÉí³µÁ¾	Road 1	213.1563581	73.35428467	0.000869485	1.112658381	0.58431375	0	229.8792	984.2285	654.8356	0.5418	3.9333	1135	3.555413122	0.008213004	60.14311761	0.138930602
103.0965813	×ÔÉí³µÁ¾	Road 1	213.48437	73.40667572	0.000940563	1.116615415	0.58431375	0	230.1851	984.2383	654.8221	0.5376	3.9375	1136	2.936292807	0.006782836	60.19035174	0.139039713
103.1132732	×ÔÉí³µÁ¾	Road 1	213.8249571	73.45574341	0.001003437	1.11834538	0.58431375	0	230.4707	984.248	654.8094	0.5331	3.9421	1137	2.736775709	0.006321952	60.23603364	0.139145238
103.129928	×ÔÉí³µÁ¾	Road 1	214.1651303	73.52956467	0.001057607	1.121997833	0.58431375	0	230.8996	984.2627	654.7903	0.5262	3.9489	1138	3.687022344	0.008517022	60.29744043	0.139287087
103.1632755	×ÔÉí³µÁ¾	Road 1	214.847004	73.61119308	0.001096079	1.125028133	0.58431375	0	231.3699	984.2783	654.769	0.5191	3.956	1139	2.428836881	0.005610613	60.37843593	0.139474187
103.1799105	×ÔÉí³µÁ¾	Road 1	215.1874906	73.68489075	0.001099977	1.131111979	0.58431375	0	231.7997	984.293	654.7494	0.5123	3.9629	1140	3.692810498	0.008530392	60.43986603	0.139616091
103.1967087	×ÔÉí³µÁ¾	Road 1	215.5316646	73.75959778	0.001099977	1.134266853	0.58431375	0	232.2299	984.3066	654.7296	0.5064	3.9687	1141	3.707106766	0.008563417	60.50213863	0.13975994
103.2132382	×ÔÉí³µÁ¾	Road 1	215.8705619	73.80933838	0.001099977	1.136890769	0.58431375	0	232.517	984.3164	654.7163	0.5019	3.9733	1142	2.792872702	0.006451536	60.54830337	0.139866581
103.2298842	×ÔÉí³µÁ¾	Road 1	216.2121971	73.88462906	0.001087343	1.139637113	0.58431375	0	232.948	984.3311	654.6961	0.4951	3.9801	1143	3.761186807	0.008688342	60.61091227	0.140011207
103.246623	×ÔÉí³µÁ¾	Road 1	216.5559687	73.93472672	0.001067139	1.143595934	0.58431375	0	233.2355	984.3408	654.6825	0.4905	3.9846	1144	2.78669517	0.006437266	60.65755816	0.140118959
103.2632808	×ÔÉí³µÁ¾	Road 1	216.8983257	73.98856659	0.001044357	1.146201253	0.58431375	0	233.5439	984.3506	654.6679	0.4864	3.9898	1145	2.941353655	0.006794527	60.70655458	0.140232141
103.2807589	×ÔÉí³µÁ¾	Road 1	217.2579111	74.06440659	0.001020045	1.149106264	0.58431375	0	233.9759	984.3652	654.6472	0.4796	3.9966	1146	3.651954395	0.008436015	60.77038391	0.140379587
103.2976568	×ÔÉí³µÁ¾	Road 1	217.6057959	74.11497116	0.000982479	1.152721047	0.58431375	0	234.2642	984.375	654.6333	0.475	4.0011	1147	2.79240405	0.006450453	60.8175696	0.140488586
103.3132373	×ÔÉí³µÁ¾	Road 1	217.9267783	74.16572113	0.000939685	1.154453635	0.58431375	0	234.5527	984.3848	654.6193	0.4705	4.0056	1148	2.963846592	0.006846486	60.86374772	0.140595257
103.3299581	×ÔÉí³µÁ¾	Road 1	218.2716251	74.24565353	0.000894747	1.159228921	0.58431375	0	235.0065	984.3994	654.5972	0.4641	4.012	1149	3.943065403	0.009108481	60.92967903	0.140747559
103.3466379	×ÔÉí³µÁ¾	Road 1	218.615896	74.3040802	0.00084798	1.161616921	0.58431375	0	235.3368	984.4111	654.5809	0.4584	4.0177	1150	3.126332781	0.007221829	60.98182554	0.140868017
103.364782	×ÔÉí³µÁ¾	Road 1	218.990649	74.35509109	0.000796561	1.16463232	0.58431375	0	235.626	984.4199	654.5665	0.4549	4.0213	1151	2.684246653	0.00620061	61.03052895	0.140980522
103.3798889	×ÔÉí³µÁ¾	Road 1	219.3028845	74.40636978	0.000742749	1.167122364	0.58431375	0	235.9155	984.4297	654.5521	0.4504	4.0258	1152	3.060620082	0.007070032	61.07676537	0.141087328
103.3966222	×ÔÉí³µÁ¾	Road 1	219.6490944	74.4835968	0.000674378	1.171379566	0.58431375	0	236.35	984.4443	654.5302	0.4436	4.0325	1153	3.848496299	0.008890026	61.14116337	0.141236087
103.413222	×ÔÉí³µÁ¾	Road 1	219.9927813	74.53512955	0.000626955	1.173727632	0.58431375	0	236.64	984.4541	654.5155	0.4391	4.037	1154	2.87867112	0.00664973	61.18894891	0.141346472
103.4299154	×ÔÉí³µÁ¾	Road 1	220.3387647	74.61302948	0.000575451	1.177224517	0.58431375	0	237.0753	984.4688	654.4934	0.4324	4.0438	1155	3.887749444	0.008980701	61.25384841	0.14149639
103.4467616	×ÔÉí³µÁ¾	Road 1	220.6881591	74.66496048	0.000522679	1.180183291	0.58431375	0	237.3658	984.4785	654.4786	0.4279	4.0483	1156	2.869127937	0.006627686	61.30218227	0.141608041
103.4632496	×ÔÉí³µÁ¾	Road 1	221.0303661	74.71739273	0.000480501	1.180770516	0.58431375	0	237.6564	984.4873	654.4639	0.4244	4.0518	1157	2.933767811	0.006777004	61.35055442	0.141719781
103.4799085	×ÔÉí³µÁ¾	Road 1	221.3764824	74.79608231	0.000437481	1.183012009	0.58431375	0	238.0928	984.502	654.4417	0.4177	4.0585	1158	3.933398074	0.00908615	61.41608042	0.141871146
103.4966169	×ÔÉí³µÁ¾	Road 1	221.7238721	74.84891968	0.000403075	1.184521079	0.58431375	0	238.384	984.5117	654.4269	0.4132	4.063	1159	2.926966388	0.006761292	61.46498523	0.141984116
103.5132941	×ÔÉí³µÁ¾	Road 1	222.0709815	74.9282547	0.000372413	1.184871674	0.58431375	0	238.8212	984.5264	654.4047	0.4065	4.0706	1160	3.961496312	0.009151056	61.53105192	0.14213673
103.5298826	×ÔÉí³µÁ¾	Road 1	222.4164898	74.98146973	0.000345147	1.185453892	0.58431375	0	239.1129	984.5361	654.3898	0.402	4.0751	1161	2.961162865	0.006840286	61.58017316	0.1422502
103.5651456	×ÔÉí³µÁ¾	Road 1	223.1523346	75.12225952	0.000320529	1.184401155	0.58431375	0	239.8849	984.5615	654.3506	0.3906	4.0865	1162	3.47384191	0.008024575	61.70267149	0.142533171
103.5802518	×ÔÉí³µÁ¾	Road 1	223.4677989	75.17943649	0.000300795	1.184792638	0.58431375	0	240.1983	984.5723	654.3347	0.3856	4.0915	1163	3.342912971	0.007722129	61.75317002	0.142649823
103.5965723	×ÔÉí³µÁ¾	Road 1	223.8088649	75.23262405	0.000271393	1.184420228	0.58431375	0	240.491	984.582	654.3198	0.3811	4.096	1164	3.00321638	0.00693743	61.80218415	0.142763045
103.6131993	×ÔÉí³µÁ¾	Road 1	224.1565808	75.28587341	0.000265299	1.184257865	0.58431375	0	240.7839	984.5918	654.3049	0.3766	4.1004	1165	2.968482255	0.006857194	61.85154106	0.14287706
103.6299256	×ÔÉí³µÁ¾	Road 1	224.5066219	75.33921204	0.000261912	1.183828354	0.58431375	0	241.077	984.6006	654.29	0.3731	4.1039	1166	2.961466379	0.006840987	61.90107551	0.142991484
103.6465981	×ÔÉí³µÁ¾	Road 1	224.8559401	75.42659454	0.000261163	1.184267521	0.58431375	0	241.5589	984.6172	654.2656	0.3653	4.1117	1167	4.301026321	0.009935371	61.97278411	0.143157131
103.6633343	×ÔÉí³µÁ¾	Road 1	225.206842	75.47980957	0.000261163	1.183584809	0.58431375	0	241.8526	984.627	654.2506	0.3608	4.1162	1168	2.960391156	0.006838504	62.02232987	0.143271582
103.6798924	×ÔÉí³µÁ¾	Road 1	225.5542539	75.53312073	0.000261163	1.183584452	0.58431375	0	242.1465	984.6367	654.2357	0.3564	4.1206	1169	2.988380114	0.006903158	62.07181169	0.143385885
103.696732	×ÔÉí³µÁ¾	Road 1	225.907963	75.61661682	0.000261163	1.182716608	0.58431375	0	242.6087	984.6514	654.2122	0.3501	4.1268	1170	4.126488893	0.009532189	62.14130007	0.143546403
103.7133355	×ÔÉí³µÁ¾	Road 1	226.2569595	75.66990051	0.000261163	1.183121681	0.58431375	0	242.9031	984.6611	654.1972	0.3457	4.1313	1171	2.986407006	0.0068986	62.19088496	0.143660944
103.7298965	×ÔÉí³µÁ¾	Road 1	226.6053065	75.72300568	0.000263414	1.183571219	0.58431375	0	243.1977	984.6709	654.1823	0.3412	4.1357	1172	2.986633464	0.006899123	62.24034662	0.143775201
103.7466379	×ÔÉí³µÁ¾	Road 1	226.9578354	75.8065361	0.000268716	1.182881474	0.58431375	0	243.661	984.6865	654.1587	0.334	4.1429	1173	4.156496241	0.009601506	62.30993199	0.143935943
103.7632927	×ÔÉí³µÁ¾	Road 1	227.3087886	75.85970306	0.000273703	1.183111429	0.58431375	0	243.9562	984.6963	654.1437	0.3296	4.1473	1174	2.982075329	0.006888594	62.35959799	0.144050671
103.7799644	×ÔÉí³µÁ¾	Road 1	227.6604667	75.93949814	0.000281888	1.182185769	0.58431375	0	244.3992	984.7109	654.1211	0.323	4.154	1175	4.030054116	0.009309425	62.42678587	0.144205875
103.7965782	×ÔÉí³µÁ¾	Road 1	228.0111678	75.9925415	0.00029144	1.182655215	0.58431375	0	244.6949	984.7207	654.1061	0.3186	4.1584	1176	2.987069728	0.006900131	62.47641242	0.144320513
103.8132675	×ÔÉí³µÁ¾	Road 1	228.3637096	76.04574966	0.000303268	1.181441784	0.58431375	0	244.9908	984.7305	654.0911	0.3141	4.1628	1177	2.985946319	0.006897536	62.52624578	0.144435628
103.8298835	×ÔÉí³µÁ¾	Road 1	228.714965	76.10254898	0.000316685	1.182283163	0.58431375	0	245.308	984.7412	654.075	0.3092	4.1678	1178	3.139239521	0.007251643	62.57840736	0.144556121
103.8466395	×ÔÉí³µÁ¾	Road 1	229.0695692	76.18609314	0.000332247	1.182178855	0.58431375	0	245.7737	984.7559	654.0513	0.3029	4.174	1179	4.173480441	0.00964074	62.64833826	0.144717661
103.8633237	×ÔÉí³µÁ¾	Road 1	229.4228986	76.23907471	0.00034831	1.181808949	0.58431375	0	246.0703	984.7656	654.0362	0.2985	4.1784	1180	2.984480412	0.00689415	62.69813183	0.144832685
103.8799305	×ÔÉí³µÁ¾	Road 1	229.7748352	76.2922348	0.000366286	1.181415319	0.58431375	0	246.3671	984.7764	654.0211	0.2932	4.1838	1181	3.003183277	0.006937353	62.74800518	0.144947892
103.8966301	×ÔÉí³µÁ¾	Road 1	230.1291241	76.37564163	0.000385841	1.18073082	0.58431375	0	246.8339	984.791	653.9974	0.287	4.19	1182	4.188818254	0.00967617	62.81795662	0.14510948
103.9132222	×ÔÉí³µÁ¾	Road 1	230.4813788	76.42867126	0.000406582	1.181342244	0.58431375	0	247.1313	984.8008	653.9823	0.2826	4.1944	1183	3.004696736	0.006940849	62.86781104	0.145224644
103.9308265	×ÔÉí³µÁ¾	Road 1	230.8555085	76.50815048	0.000427013	1.181313515	0.58431375	0	247.5777	984.8154	653.9596	0.276	4.2009	1184	3.87860255	0.008959572	62.93609084	0.14538237
103.9465766	×ÔÉí³µÁ¾	Road 1	231.1904678	76.56122131	0.000450266	1.175606012	0.58431375	0	247.8755	984.8252	653.9444	0.2718	4.2053	1185	3.124124607	0.007216728	62.98529638	0.145496035
103.9638282	×ÔÉí³µÁ¾	Road 1	231.5576108	76.61406555	0.000473236	1.177641511	0.58431375	0	248.1736	984.8359	653.9293	0.2665	4.2106	1186	2.923289894	0.0067528	63.0357278	0.145612531
103.9798614	×ÔÉí³µÁ¾	Road 1	231.899194	76.69722519	0.000488975	1.178746104	0.58431375	0	248.6424	984.8506	653.9054	0.2606	4.2168	1187	4.33251268	0.010008104	63.10519169	0.145772993
103.9965709	×ÔÉí³µÁ¾	Road 1	232.2553077	76.72356491	0.000508551	1.177760482	0.58431375	0	248.7917	984.8555	653.8979	0.2584	4.219	1188	1.941738025	0.004485415	63.13763709	0.145847942
104.0132404	×ÔÉí³µÁ¾	Road 1	232.6110229	76.8213707	0.000526252	1.168766022	0.58431375	0	249.3466	984.874	653.8696	0.2498	4.2275	1189	4.790283509	0.011065555	63.21748876	0.146032399
104.0298582	×ÔÉí³µÁ¾	Road 1	232.9658765	76.87367935	0.000540097	1.165055752	0.58431375	0	249.6457	984.8838	653.8544	0.2454	4.2319	1190	2.988368635	0.006903132	63.26714894	0.146147114
104.0465783	×ÔÉí³µÁ¾	Road 1	233.3231561	76.92580261	0.000554183	1.161160231	0.58431375	0	249.945	984.8926	653.8392	0.242	4.2352	1191	2.970030584	0.006860771	63.31680813	0.146261827
104.0633017	×ÔÉí³µÁ¾	Road 1	233.6808844	77.0072113	0.000565376	1.154836297	0.58431375	0	250.4158	984.9072	653.8153	0.2359	4.2423	1192	4.136828502	0.009556074	63.38598993	0.146421637
104.0798799	×ÔÉí³µÁ¾	Road 1	234.0357455	77.05886078	0.000576719	1.151951909	0.58431375	0	250.7156	984.916	653.8	0.2325	4.2457	1193	2.97338922	0.006868529	63.43528347	0.146535505
104.0965952	×ÔÉí³µÁ¾	Road 1	234.3937802	77.11036606	0.00058757	1.149147987	0.58431375	0	251.0156	984.9248	653.7848	0.2292	4.25	1194	2.952409996	0.006820067	63.48463397	0.146649504
104.1132754	×ÔÉí³µÁ¾	Road 1	234.7514353	77.19111557	0.000597907	1.146086931	0.58431375	0	251.4876	984.9375	653.7607	0.226	4.2552	1195	4.128077092	0.009535858	63.55349086	0.146808564
104.1300035	×ÔÉí³µÁ¾	Road 1	235.1103584	77.24241486	0.000610338	1.146431088	0.58431375	0	251.7882	984.9453	653.7451	0.2237	4.2587	1196	2.947161784	0.006807944	63.60279145	0.146922448
104.1466276	×ÔÉí³µÁ¾	Road 1	235.4672845	77.29365234	0.000628297	1.148661017	0.58431375	0	252.089	984.9521	653.7299	0.2223	4.2612	1197	2.959259971	0.006835891	63.65198635	0.147036088
104.1631959	×ÔÉí³µÁ¾	Road 1	235.8233725	77.37148361	0.000649348	1.149384141	0.58431375	0	252.5406	984.9629	653.707	0.2208	4.2658	1198	4.041206843	0.009335188	63.71894243	0.147190757
104.179864	×ÔÉí³µÁ¾	Road 1	236.1818433	77.42330475	0.000674378	1.151609898	0.58431375	0	252.8419	984.9697	653.6917	0.2194	4.2691	1199	2.981694676	0.006887715	63.76864144	0.147305562
104.1966728	×ÔÉí³µÁ¾	Road 1	236.5437055	77.50131454	0.000708741	1.156687379	0.58431375	0	253.2943	984.9795	653.6686	0.2189	4.2734	1200	4.00960682	0.009262192	63.83603811	0.147461248
104.213185	×ÔÉí³µÁ¾	Road 1	236.8994233	77.55354767	0.000742749	1.160202861	0.58431375	0	253.5961	984.9854	653.6533	0.2185	4.2757	1201	3.022570349	0.006982138	63.88594756	0.147576539
104.2299135	×ÔÉí³µÁ¾	Road 1	237.2600436	77.60595932	0.000782483	1.163298488	0.58431375	0	253.8981	984.9922	653.6378	0.2181	4.2789	1202	3.004145329	0.006939576	63.93620248	0.147692628
104.2466373	×ÔÉí³µÁ¾	Road 1	237.6208057	77.6585907	0.000830871	1.165512562	0.58431375	0	254.2004	984.998	653.6224	0.2188	4.2821	1203	3.01539031	0.006965552	63.98663114	0.147809118
104.263202	×ÔÉí³µÁ¾	Road 1	237.9785347	77.74523849	0.000877852	1.171146393	0.58431375	0	254.6974	985.0068	653.597	0.22	4.2857	1204	4.417210099	0.010203755	64.05980077	0.14797814
104.2798759	×ÔÉí³µÁ¾	Road 1	238.3388674	77.7980896	0.000923095	1.173215628	0.58431375	0	255.0002	985.0127	653.5815	0.2197	4.2891	1205	3.035447082	0.007011883	64.11041353	0.148095055
104.2970615	×ÔÉí³µÁ¾	Road 1	238.7106376	77.87747269	0.000978864	1.175238967	0.58431375	0	255.4548	985.0215	653.5583	0.2201	4.2936	1206	4.012892763	0.009269782	64.17937758	0.148254362
104.3132651	×ÔÉí³µÁ¾	Road 1	239.0613177	77.91153717	0.001027485	1.17627418	0.58431375	0	255.6497	985.0254	653.5485	0.2207	4.2959	1207	2.321152318	0.005361862	64.21698864	0.148341244
104.3298958	×ÔÉí³µÁ¾	Road 1	239.4216246	77.99480667	0.001079616	1.17708528	0.58431375	0	256.1266	985.0342	653.5241	0.2206	4.299	1208	4.279681747	0.009886065	64.28816254	0.148505655
104.3465983	×ÔÉí³µÁ¾	Road 1	239.7837332	78.04767151	0.001129505	1.177517056	0.58431375	0	256.4304	985.04	653.5086	0.2213	4.3024	1209	3.041120665	0.007024989	64.33895685	0.14862299
104.3632865	×ÔÉí³µÁ¾	Road 1	240.1459003	78.12715073	0.001179884	1.178046346	0.58431375	0	256.7561	985.0459	653.492	0.2223	4.3053	1210	4.121597985	0.009520891	64.4077389	0.148781877
104.3799409	×ÔÉí³µÁ¾	Road 1	240.5075968	78.18362732	0.001230688	1.178424239	0.58431375	0	257.2125	985.0537	653.4687	0.2228	4.3068	1211	3.19848466	0.0073885	64.461008	0.148904928
104.3966178	×ÔÉí³µÁ¾	Road 1	240.8700588	78.24402466	0.001276455	1.178201318	0.58431375	0	257.5605	985.0605	653.4509	0.2233	4.3093	1212	3.356503854	0.007753524	64.51698387	0.149034233
104.413199	×ÔÉí³µÁ¾	Road 1	241.2306847	78.2968483	0.001315633	1.177985311	0.58431375	0	257.8652	985.0654	653.4354	0.224	4.3097	1213	3.063859937	0.007077516	64.56778625	0.149151586
104.4299916	×ÔÉí³µÁ¾	Road 1	241.5962971	78.37971268	0.001353363	1.177888393	0.58431375	0	258.3445	985.0742	653.4109	0.2226	4.3108	1214	4.250302302	0.009818198	64.63916017	0.14931646
104.4465897	×ÔÉí³µÁ¾	Road 1	241.957915	78.43248138	0.001390667	1.177676082	0.58431375	0	258.6498	985.0791	653.3953	0.2223	4.3092	1215	3.064214392	0.007078335	64.69002009	0.149433946
104.4632115	×ÔÉí³µÁ¾	Road 1	242.3202953	78.48516769	0.001419379	1.178130746	0.58431375	0	258.9553	985.085	653.3796	0.221	4.3096	1216	3.059621753	0.007067726	64.74087668	0.149551425
104.4798905	×ÔÉí³µÁ¾	Road 1	242.6843065	78.5681076	0.001441462	1.177816033	0.58431375	0	259.4357	985.0928	653.3552	0.2209	4.3087	1217	4.285687528	0.009899938	64.81235783	0.149716547
104.4965905	×ÔÉí³µÁ¾	Road 1	243.0490193	78.62102737	0.001459058	1.17628777	0.58431375	0	259.7417	985.0977	653.3395	0.2216	4.308	1218	3.063826578	0.007077439	64.86352352	0.149834739
104.5132633	×ÔÉí³µÁ¾	Road 1	243.4134003	78.67731171	0.0014685	1.177398086	0.58431375	0	260.0698	985.1035	653.3228	0.2217	4.308	1219	3.2064236	0.007406839	64.9169836	0.149958232
104.5299152	×ÔÉí³µÁ¾	Road 1	243.7775686	78.73004608	0.001470867	1.176776886	0.58431375	0	260.3763	985.1084	653.3071	0.2214	4.3073	1220	3.06630528	0.007083165	64.96804345	0.15007618
104.5465502	×ÔÉí³µÁ¾	Road 1	244.141629	78.78650894	0.001470867	1.176138639	0.58431375	0	260.7048	985.1143	653.2903	0.2215	4.307	1221	3.222975354	0.007445073	65.02165781	0.15020003
104.5632165	×ÔÉí³µÁ¾	Road 1	244.5066676	78.8505043	0.001470867	1.176751852	0.58431375	0	261.0775	985.1201	653.2713	0.2224	4.3056	1222	3.528770766	0.00815146	65.08046904	0.150335883
104.5798728	×ÔÉí³µÁ¾	Road 1	244.8717855	78.9144928	0.001455527	1.176102042	0.58431375	0	261.4504	985.126	653.2523	0.2233	4.3046	1223	3.532666275	0.008160459	65.13931023	0.150471807
104.5965936	×ÔÉí³µÁ¾	Road 1	245.2387196	79.00104446	0.001415913	1.175457001	0.58431375	0	261.9555	985.1348	653.2264	0.2237	4.3043	1224	4.446492545	0.010271398	65.21365925	0.150643553
104.6132902	×ÔÉí³µÁ¾	Road 1	245.6053664	79.05357971	0.001365723	1.175170422	0.58431375	0	262.2632	985.1396	653.2108	0.2244	4.3036	1225	3.063740985	0.007077242	65.26481341	0.150761719
104.6298542	×ÔÉí³µÁ¾	Road 1	245.9694626	79.13251648	0.001300304	1.175303936	0.58431375	0	262.7251	985.1465	653.1871	0.225	4.3021	1226	4.172844749	0.009639271	65.33393216	0.150921383
104.6465636	×ÔÉí³µÁ¾	Road 1	246.3370021	79.18520966	0.001216027	1.174452543	0.58431375	0	263.0333	985.1514	653.1714	0.2257	4.3014	1227	3.073154833	0.007098988	65.38528292	0.151040004
104.6631935	×ÔÉí³µÁ¾	Road 1	246.7030344	79.23768997	0.001129505	1.174496651	0.58431375	0	263.3417	985.1563	653.1557	0.2265	4.2997	1228	3.076559398	0.007106852	65.43644586	0.15115819
104.6799147	×ÔÉí³µÁ¾	Road 1	247.0714429	79.3167572	0.001035898	1.173741698	0.58431375	0	263.8047	985.1641	653.1321	0.2271	4.2992	1229	4.156503319	0.009601523	65.50594755	0.151318739
104.6966528	×ÔÉí³µÁ¾	Road 1	247.4404668	79.36919632	0.000923095	1.173781395	0.58431375	0	264.1136	985.1689	653.1162	0.2278	4.2985	1230	3.065502229	0.00708131	65.55725809	0.151437266
104.7132065	×ÔÉí³µÁ¾	Road 1	247.805719	79.43298569	0.000822002	1.173826814	0.576470613	0	264.4228	985.1738	653.1005	0.2285	4.2978	1231	3.562006288	0.008228235	65.61622238	0.151573474
104.7299005	×ÔÉí³µÁ¾	Road 1	248.1743918	79.50263214	0.000721922	1.413825035	0.576470613	0	264.8868	985.1816	653.0767	0.229	4.2972	1232	3.783462636	0.008739799	65.67938376	0.151719376
104.7465928	×ÔÉí³µÁ¾	Road 1	248.5434946	79.60408401	0.000610997	2.826358318	0.576470613	0	265.1966	985.1865	653.0609	0.2297	4.2965	1233	5.097611518	0.011775483	65.76447429	0.151915936
104.7632154	×ÔÉí³µÁ¾	Road 1	248.9121599	79.84286499	0.000519714	3.136045218	0.576470613	0	265.6622	985.1934	653.0371	0.2313	4.2949	1234	10.81792582	0.024989409	65.94429621	0.152331324
104.7799809	×ÔÉí³µÁ¾	Road 1	249.2845575	79.96348801	0.000439066	1.970198035	0.576470613	0	265.9733	985.1992	653.0212	0.2311	4.2952	1235	5.890029556	0.013605968	66.04304577	0.152559436
104.7966467	×ÔÉí³µÁ¾	Road 1	249.6550705	80.03476868	0.000359301	1.338814974	0.576470613	0	266.2848	985.2041	653.0053	0.2319	4.2944	1236	3.879434553	0.008961494	66.10769981	0.152708787
104.8132649	×ÔÉí³µÁ¾	Road 1	250.0250608	80.15103836	0.000299974	1.970113754	0.576470613	0	266.7748	985.2119	652.9803	0.233	4.2934	1237	5.76612233	0.013319743	66.20352233	0.152930137
104.8299007	×ÔÉí³µÁ¾	Road 1	250.3959006	80.25008011	0.000250101	2.106449842	0.576470613	0	267.0871	985.2168	652.9644	0.2338	4.2926	1238	5.050511316	0.011666681	66.28754154	0.153124221
104.8466402	×ÔÉí³µÁ¾	Road 1	250.7694717	80.3401886	0.000201962	1.705939412	0.568627477	0	267.3998	985.2217	652.9484	0.2346	4.2919	1239	4.660163675	0.010764978	66.36555045	0.153304422
104.8632628	×ÔÉí³µÁ¾	Road 1	251.1408756	80.43596191	0.000166455	1.250081301	0.568627477	0	267.8693	985.2285	652.9244	0.2353	4.2902	1240	4.928289847	0.01138435	66.44747138	0.153493659
104.8798645	×ÔÉí³µÁ¾	Road 1	251.5120833	80.49465637	0.000137071	1.369591832	0.56078434	0	268.1826	985.2344	652.9084	0.2351	4.2904	1241	3.384547864	0.007818306	66.50366061	0.153623456
104.8966422	×ÔÉí³µÁ¾	Road 1	251.8875587	80.56623917	0.000111578	1.501538038	0.56078434	0	268.5185	985.2393	652.8912	0.2364	4.2892	1242	3.895904373	0.008999539	66.5690247	0.153774447
104.9132057	×ÔÉí³µÁ¾	Road 1	252.2587128	80.66826782	9.45E-05	1.290578842	0.552941203	0	269.0118	985.2471	652.8661	0.2375	4.2881	1243	5.218920344	0.012055706	66.65546866	0.153974133
104.9299119	×ÔÉí³µÁ¾	Road 1	252.6333109	80.72190857	8.16E-05	1.131591439	0.552941203	0	269.326	985.252	652.85	0.2383	4.2873	1244	3.166961467	0.007315681	66.70837644	0.15409635
104.9465462	×ÔÉí³µÁ¾	Road 1	253.0065236	80.7707016	7.14E-05	1.094287157	0.545098066	0	269.6404	985.2568	652.8339	0.2392	4.2865	1245	2.975078099	0.00687243	66.75786483	0.154210668
104.9632553	×ÔÉí³µÁ¾	Road 1	253.3817726	80.84797668	6.44E-05	1.108609319	0.545098066	0	270.1348	985.2646	652.8087	0.2403	4.2854	1246	4.158509747	0.009606158	66.82734977	0.154371178
104.9799431	×ÔÉí³µÁ¾	Road 1	253.7567669	80.89602127	5.91E-05	1.059605479	0.53725493	0	270.4497	985.2705	652.7926	0.2402	4.2856	1247	2.941319495	0.006794448	66.87643402	0.154484563
104.9966222	×ÔÉí³µÁ¾	Road 1	254.131772	80.94100342	5.40E-05	0.998297572	0.53725493	0	270.7647	985.2754	652.7765	0.241	4.2848	1248	2.815490801	0.006503784	66.9233937	0.154593039
105.0131927	×ÔÉí³µÁ¾	Road 1	254.5046301	81.00456619	5.00E-05	0.96603328	0.53725493	0	271.2376	985.2822	652.7523	0.2428	4.283	1249	3.614257027	0.008348934	66.98328388	0.154731386
105.0299726	×ÔÉí³µÁ¾	Road 1	254.8823936	81.04658203	4.62E-05	0.965873539	0.53725493	0	271.5531	985.2881	652.7362	0.2427	4.2832	1250	2.683678871	0.006199298	67.02831559	0.154835409
105.0466952	×ÔÉí³µÁ¾	Road 1	255.2590638	81.08835754	4.23E-05	0.951888382	0.53725493	0	271.8687	985.293	652.7201	0.2435	4.2823	1251	2.680840629	0.006192742	67.07314637	0.154938968
105.0631793	×ÔÉí³µÁ¾	Road 1	255.6306488	81.15163193	3.90E-05	0.915139675	0.53725493	0	272.3651	985.3008	652.6948	0.2447	4.2811	1252	3.622128315	0.008367116	67.13285364	0.155076892
105.0798869	×ÔÉí³µÁ¾	Road 1	256.0074553	81.19065399	3.64E-05	0.90588671	0.53725493	0	272.6811	985.3057	652.6786	0.2456	4.2803	1253	2.569845709	0.005936344	67.17578967	0.155176074
105.0965575	×ÔÉí³µÁ¾	Road 1	256.3836074	81.22964172	3.31E-05	0.903379619	0.53725493	0	272.9973	985.3105	652.6624	0.2464	4.2794	1254	2.573131102	0.005943933	67.21868533	0.155275163
105.1132992	×ÔÉí³µÁ¾	Road 1	256.7615565	81.27103958	2.99E-05	0.897935987	0.53725493	0	273.3363	985.3164	652.6451	0.2467	4.2791	1255	2.66837316	0.006163942	67.26335848	0.155378358
105.1298349	×ÔÉí³µÁ¾	Road 1	257.1351554	81.33642883	2.71E-05	0.880473971	0.53725493	0	273.8789	985.3242	652.6174	0.2488	4.2771	1256	3.711094376	0.008572628	67.32472408	0.155520113
105.146577	×ÔÉí³µÁ¾	Road 1	257.5135913	81.37393341	2.39E-05	0.876079142	0.53725493	0	274.1957	985.3301	652.6013	0.2487	4.2772	1257	2.50788081	0.005793205	67.36671123	0.155617103
105.1632179	×ÔÉí³µÁ¾	Road 1	257.8899378	81.41930695	2.12E-05	0.873392224	0.53725493	0	274.5126	985.335	652.5851	0.2496	4.2763	1258	2.851223617	0.006586327	67.41415821	0.155726705
105.1806543	×ÔÉí³µÁ¾	Road 1	258.2845177	81.46704941	1.91E-05	0.869166195	0.53725493	0	274.9882	985.3418	652.5607	0.2514	4.2745	1259	2.860789817	0.006608424	67.46403992	0.155841932
105.1965364	×ÔÉí³µÁ¾	Road 1	258.6440898	81.50408707	1.67E-05	0.863692641	0.53725493	0	275.3055	985.3477	652.5446	0.2513	4.2746	1260	2.576128406	0.005950857	67.50495436	0.155936445
105.2132906	×ÔÉí³µÁ¾	Road 1	259.0236367	81.55649185	1.46E-05	0.860147774	0.53725493	0	275.6456	985.3525	652.5272	0.2526	4.2733	1261	3.138146258	0.007249118	67.55753144	0.156057898
105.229948	×ÔÉí³µÁ¾	Road 1	259.4011967	81.59829483	1.28E-05	0.858238995	0.529411793	0	276.122	985.3604	652.5028	0.2534	4.2724	1262	2.703876367	0.006245954	67.60257102	0.156161939
105.2465215	×ÔÉí³µÁ¾	Road 1	259.7770336	81.63726196	1.08E-05	0.854932904	0.529411793	0	276.4625	985.3652	652.4854	0.2547	4.2711	1263	2.593331699	0.005990596	67.64555152	0.156261224
105.263213	×ÔÉí³µÁ¾	Road 1	260.1557151	81.67350998	8.84E-06	0.850548089	0.529411793	0	276.7804	985.3711	652.4692	0.2546	4.2712	1264	2.467689822	0.005700363	67.68674097	0.156356372
105.2799151	×ÔÉí³µÁ¾	Road 1	260.5348891	81.72767944	6.99E-06	0.847562611	0.529411793	0	277.2575	985.3779	652.4448	0.2565	4.2694	1265	3.225582803	0.007451096	67.74061508	0.156480821
105.296615	×ÔÉí³µÁ¾	Road 1	260.9141918	81.76618652	4.90E-06	0.846134365	0.529411793	0	277.5986	985.3838	652.4274	0.2568	4.2691	1266	2.564919091	0.005924963	67.78344905	0.156579767
105.3131958	×ÔÉí³µÁ¾	Road 1	261.2909776	81.80718613	2.98E-06	0.843877077	0.529411793	0	277.917	985.3887	652.4112	0.2577	4.2681	1267	2.683989776	0.006200016	67.82795175	0.156682569
105.330869	×ÔÉí³µÁ¾	Road 1	261.6928235	81.85560837	1.68E-06	0.842207968	0.529411793	0	278.3949	985.3965	652.3867	0.2586	4.2673	1268	2.874255066	0.006639529	67.87874886	0.15679991
105.3466258	×ÔÉí³µÁ¾	Road 1	262.0512521	81.891259	7.64E-07	0.840800703	0.529411793	0	278.7137	985.4014	652.3704	0.2595	4.2664	1269	2.537800842	0.00586232	67.91873643	0.156892281
105.3632432	×ÔÉí³µÁ¾	Road 1	262.4294706	81.93966751	3.09E-07	0.839142561	0.529411793	0	279.0554	985.4072	652.353	0.2598	4.266	1270	2.999513835	0.006928877	67.96858072	0.157007421
105.3798467	×ÔÉí³µÁ¾	Road 1	262.8075828	81.98281631	1.22E-07	0.838092744	0.529411793	0	279.534	985.4141	652.3285	0.2617	4.2642	1271	2.778373526	0.006418043	68.01471152	0.157113984
105.3966196	×ÔÉí³µÁ¾	Road 1	263.189717	82.01830902	2.25E-08	0.837105036	0.529411793	0	279.8533	985.4199	652.3123	0.2616	4.2642	1272	2.437471816	0.00563056	68.05559494	0.157208424
105.4146476	×ÔÉí³µÁ¾	Road 1	263.600724	82.07389984	2.03E-09	0.836274981	0.529411793	0	280.3553	985.4277	652.2866	0.2629	4.2629	1273	3.124741251	0.007218152	68.11192766	0.157338553
105.4298186	×ÔÉí³µÁ¾	Road 1	263.9467469	82.10930328	7.81E-12	0.836146057	0.529411793	0	280.6749	985.4326	652.2703	0.2638	4.262	1274	2.594177873	0.005992551	68.151284	0.157429466
105.4464925	×ÔÉí³µÁ¾	Road 1	264.3272118	82.14474792	-1.20E-11	0.834917665	0.53725493	0	280.9947	985.4375	652.254	0.2648	4.2611	1275	2.447636443	0.00565404	68.19209566	0.157523741
105.5132574	×ÔÉí³µÁ¾	Road 1	265.8535621	82.30163956	-1.20E-11	0.837714314	0.53725493	0	282.4124	985.46	652.1815	0.2681	4.2578	1276	2.609902563	0.006028875	68.36634556	0.157926258
105.530067	×ÔÉí³µÁ¾	Road 1	266.2381381	82.36240768	-1.20E-11	0.837474644	0.53725493	0	282.962	985.4688	652.1534	0.2693	4.2566	1277	3.512780576	0.008114523	68.42539375	0.15806266
105.5465634	×ÔÉí³µÁ¾	Road 1	266.6157259	82.40031738	1.56E-07	0.838412404	0.53725493	0	283.3056	985.4746	652.1359	0.2696	4.2562	1278	2.576956891	0.00595277	68.4679045	0.158160859
105.5631717	×ÔÉí³µÁ¾	Road 1	266.9960365	82.43581696	3.67E-07	0.83913362	0.53725493	0	283.6265	985.4795	652.1195	0.2706	4.2552	1279	2.463584327	0.00569088	68.50882043	0.158255375
105.5798401	×ÔÉí³µÁ¾	Road 1	267.3779824	82.49168243	6.75E-07	0.837825179	0.53725493	0	284.1311	985.4873	652.0938	0.2719	4.2539	1280	3.330103404	0.007692539	68.56432795	0.158383598
105.5966456	×ÔÉí³µÁ¾	Road 1	267.7632352	82.52716827	1.18E-06	0.838542223	0.53725493	0	284.4523	985.4922	652.0773	0.2729	4.2529	1281	2.447514836	0.005653759	68.60545966	0.158478612
105.6132448	×ÔÉí³µÁ¾	Road 1	268.1439559	82.57026901	1.69E-06	0.837974072	0.53725493	0	284.7737	985.498	652.0609	0.2729	4.253	1282	2.794562041	0.006455438	68.65184696	0.158585766
105.6298531	×ÔÉí³µÁ¾	Road 1	268.5250969	82.61579361	2.27E-06	0.838432372	0.53725493	0	285.2561	985.5059	652.0363	0.2738	4.252	1283	2.899056917	0.006696821	68.69999535	0.158696989
105.6465779	×ÔÉí³µÁ¾	Road 1	268.9090776	82.65126572	2.67E-06	0.838293672	0.53725493	0	285.5778	985.5107	652.0198	0.2747	4.251	1284	2.457428993	0.005676661	68.74109549	0.158791931
105.6631657	×ÔÉí³µÁ¾	Road 1	269.2901098	82.69443512	2.90E-06	0.837894201	0.53725493	0	285.9687	985.5166	651.9999	0.2759	4.2498	1285	2.802541536	0.006473871	68.7875834	0.158899318
105.679866	×ÔÉí³µÁ¾	Road 1	269.6739737	82.74763641	3.09E-06	0.838113904	0.53725493	0	286.4518	985.5244	651.9752	0.2769	4.2488	1286	3.220927903	0.007440343	68.84137385	0.159023574
105.6964959	×ÔÉí³µÁ¾	Road 1	270.0563833	82.78299866	3.21E-06	0.837783158	0.53725493	0	286.774	985.5293	651.9587	0.2778	4.2479	1287	2.464804239	0.005693698	68.88236335	0.159118259
105.7132805	×ÔÉí³µÁ¾	Road 1	270.4425157	82.8185463	3.40E-06	0.837835193	0.545098066	0	287.0964	985.5342	651.9423	0.2787	4.2469	1288	2.459613063	0.005681706	68.92364699	0.159213625
105.729968	×ÔÉí³µÁ¾	Road 1	270.8266725	82.87441864	3.48E-06	0.839503288	0.545098066	0	287.6033	985.543	651.9164	0.2791	4.2465	1289	3.341719531	0.007719372	68.97941183	0.159342441
105.746511	×ÔÉí³µÁ¾	Road 1	271.2076675	82.90987701	3.58E-06	0.840451181	0.545098066	0	287.9261	985.5479	651.8999	0.2801	4.2455	1290	2.480283687	0.005729455	69.02044327	0.159437224
105.7632044	×ÔÉí³µÁ¾	Road 1	271.5922888	82.94549332	3.63E-06	0.841160357	0.545098066	0	288.2489	985.5527	651.8834	0.281	4.2445	1291	2.474169767	0.005715332	69.06174541	0.159532632
105.7798409	×ÔÉí³µÁ¾	Road 1	271.9757776	82.98369141	3.72E-06	0.841858447	0.545098066	0	288.595	985.5586	651.8657	0.2814	4.2441	1292	2.591637927	0.005986684	69.10486124	0.159632229
105.7964811	×ÔÉí³µÁ¾	Road 1	272.3595274	83.02188263	3.78E-06	0.841710746	0.545098066	0	288.9413	985.5635	651.848	0.2828	4.2427	1293	2.592034048	0.005987599	69.14799316	0.159731864
105.8131707	×ÔÉí³µÁ¾	Road 1	272.7446309	83.06772995	3.83E-06	0.842388928	0.545098066	0	289.357	985.5703	651.8268	0.2834	4.242	1294	2.917559539	0.006739563	69.19668626	0.159844345
105.8298721	×ÔÉí³µÁ¾	Road 1	273.1302655	83.12383575	3.85E-06	0.843437552	0.552941203	0	289.8654	985.5791	651.8008	0.2838	4.2415	1295	3.358905706	0.007759072	69.25278468	0.159973933
105.8465152	×ÔÉí³µÁ¾	Road 1	273.5147313	83.16214371	3.92E-06	0.844565213	0.552941203	0	290.2122	985.584	651.7831	0.2852	4.2401	1296	2.600654715	0.006007512	69.29606768	0.160073916
105.8631723	×ÔÉí³µÁ¾	Road 1	273.8996848	83.19797974	3.92E-06	0.84612453	0.552941203	0	290.5361	985.5889	651.7665	0.2862	4.2391	1297	2.493610594	0.00576024	69.33760386	0.160169865
105.8798348	×ÔÉí³µÁ¾	Road 1	274.2850265	83.25441513	3.92E-06	0.847602725	0.53725493	0	291.0453	985.5977	651.7405	0.2866	4.2386	1298	3.3835684	0.007816043	69.39398272	0.1603001
105.8966081	×ÔÉí³µÁ¾	Road 1	274.6730954	83.29026489	3.98E-06	0.844915926	0.53725493	0	291.3695	985.6025	651.724	0.2876	4.2377	1299	2.485907713	0.005742447	69.43567945	0.16039642
105.9131471	×ÔÉí³µÁ¾	Road 1	275.0559092	83.32598419	3.98E-06	0.842229128	0.529411793	0	291.6939	985.6074	651.7074	0.2886	4.2367	1300	2.502959642	0.005781837	69.47707593	0.160492045
105.9298078	×ÔÉí³µÁ¾	Road 1	275.4417861	83.37921982	3.98E-06	0.838861942	0.529411793	0	292.1807	985.6152	651.6825	0.2895	4.2357	1301	3.250164361	0.00750788	69.53122598	0.160617132
105.9465678	×ÔÉí³µÁ¾	Road 1	275.830141	83.41728745	3.98E-06	0.837934136	0.521568656	0	292.5286	985.6211	651.6647	0.29	4.2353	1302	2.585808192	0.005973217	69.57456425	0.160717243
105.9631871	×ÔÉí³µÁ¾	Road 1	276.2153978	83.45269775	4.05E-06	0.833848894	0.513725519	0	292.8535	985.626	651.6482	0.291	4.2343	1303	2.485385344	0.00574124	69.61586959	0.160812659
105.9798464	×ÔÉí³µÁ¾	Road 1	276.6018238	83.50519867	4.08E-06	0.82709676	0.505882382	0	293.341	985.6338	651.6233	0.292	4.2333	1304	3.223019541	0.007445175	69.66956265	0.16093669
105.9965496	×ÔÉí³µÁ¾	Road 1	276.9894313	83.53995667	4.15E-06	0.822711051	0.490196079	0	293.6662	985.6387	651.6066	0.293	4.2323	1305	2.45175945	0.005663564	69.71051496	0.16103129
106.01317	×ÔÉí³µÁ¾	Road 1	277.3753549	83.59159241	4.22E-06	0.812324226	0.466666669	0	294.1543	985.6465	651.5817	0.294	4.2313	1306	3.193784073	0.007377641	69.76359689	0.161153909
106.0298512	×ÔÉí³µÁ¾	Road 1	277.7628483	83.6254715	4.22E-06	0.803275943	0.443137258	0	294.4798	985.6523	651.5651	0.294	4.2313	1307	2.417883089	0.00558531	69.80393017	0.161247079
106.0465017	×ÔÉí³µÁ¾	Road 1	278.1497808	83.65882874	4.22E-06	0.791678548	0.403921574	0	294.8055	985.6572	651.5485	0.295	4.2303	1308	2.398792663	0.005541211	69.84387114	0.161339342
106.0632973	×ÔÉí³µÁ¾	Road 1	278.5403242	83.70979843	4.22E-06	0.76557833	0.372549027	0	295.3175	985.665	651.5223	0.2965	4.2288	1309	3.145767943	0.007266724	69.89670621	0.161461391
106.0798664	×ÔÉí³µÁ¾	Road 1	278.925744	83.74102707	4.22E-06	0.758726418	0.333333343	0	295.6435	985.6709	651.5056	0.2966	4.2288	1310	2.315039057	0.00534774	69.93506426	0.161549998
106.0966645	×ÔÉí³µÁ¾	Road 1	279.3166357	83.77163773	4.29E-06	0.736548185	0.294117659	0	295.9696	985.6758	651.489	0.2976	4.2278	1311	2.270546815	0.005244963	69.97320529	0.161638104
106.1131665	×ÔÉí³µÁ¾	Road 1	279.700883	83.82565613	4.32E-06	1.070470572	0.270588249	0	296.459	985.6836	651.464	0.2987	4.2267	1312	3.32256164	0.007675117	70.02803417	0.161764759
106.1298551	×ÔÉí³µÁ¾	Road 1	280.0897278	83.88025818	4.36E-06	1.290370226	0.239215687	0	296.7854	985.6885	651.4473	0.2998	4.2257	1313	3.323345895	0.007676929	70.08349605	0.161892876
106.1466598	×ÔÉí³µÁ¾	Road 1	280.481646	83.95864563	4.39E-06	1.137290478	0.20784314	0	297.2756	985.6963	651.4222	0.3009	4.2247	1314	4.335916016	0.010015966	70.15636011	0.162061192
106.1631897	×ÔÉí³µÁ¾	Road 1	280.8673146	83.99393234	4.46E-06	0.743793964	0.176470593	0	297.6025	985.7012	651.4056	0.302	4.2237	1315	2.502502231	0.00578078	70.1977261	0.162156747
106.1798171	×ÔÉí³µÁ¾	Road 1	281.2553988	84.02437134	4.46E-06	0.768635571	0.145098045	0	297.9296	985.707	651.3889	0.3021	4.2237	1316	2.282589675	0.005272782	70.23567952	0.16224442
106.1966284	×ÔÉí³µÁ¾	Road 1	281.6480353	84.07951584	4.51E-06	0.918189645	0.105882354	0	298.4205	985.7148	651.3638	0.3032	4.2228	1317	3.336600525	0.007707547	70.29177233	0.162373994
106.2132213	×ÔÉí³µÁ¾	Road 1	282.0357433	84.11725388	4.51E-06	0.831530511	0.082352944	0	298.748	985.7197	651.347	0.3043	4.2214	1318	2.607187859	0.006022604	70.33503313	0.162473927
106.2299652	×ÔÉí³µÁ¾	Road 1	282.4271237	84.14813919	4.51E-06	0.679694593	0.050980393	0	299.0755	985.7246	651.3304	0.3054	4.2204	1319	2.295621359	0.005302885	70.37347083	0.162562718
106.2465985	×ÔÉí³µÁ¾	Road 1	282.8160898	84.1856163	4.54E-06	0.631620467	0.027450981	0	299.5671	985.7324	651.3052	0.3066	4.2193	1320	2.593645343	0.005991321	70.4166115	0.162662373
106.2631437	×ÔÉí³µÁ¾	Road 1	283.2031192	84.21186676	4.56E-06	0.673282981	0.019607844	0	299.8949	985.7383	651.2885	0.3067	4.2193	1321	2.109450255	0.00487283	70.45151287	0.162742995
106.2798872	×ÔÉí³µÁ¾	Road 1	283.5949206	84.24049301	4.61E-06	0.639491081	0.011764706	0	300.2463	985.7432	651.2705	0.3082	4.2178	1322	2.199652575	0.005081197	70.48834286	0.162828072
106.2965787	×ÔÉí³µÁ¾	Road 1	283.9856561	84.2732872	4.61E-06	0.509304464	0	0	300.7384	985.751	651.2454	0.3094	4.2167	1323	2.386064627	0.005511809	70.52816986	0.162920072
106.3132109	×ÔÉí³µÁ¾	Road 1	284.3750833	84.29100266	4.61E-06	0.482076585	0	0	301.0665	985.7568	651.2286	0.3095	4.2166	1324	1.731403006	0.003999541	70.55696676	0.162986593
106.3312117	×ÔÉí³µÁ¾	Road 1	284.7966471	84.30883484	4.61E-06	0.49799794	0	0	301.3947	985.7617	651.2119	0.3105	4.2155	1325	1.677427484	0.003874857	70.58716187	0.163056344
106.3464865	×ÔÉí³µÁ¾	Road 1	285.1544577	84.32983246	4.61E-06	0.484869391	0	0.011764706	301.7699	985.7676	651.1927	0.3115	4.2146	1326	1.957594417	0.004522043	70.61706366	0.163125417
106.3631684	×ÔÉí³µÁ¾	Road 1	285.5453101	84.34666214	4.61E-06	0.334321231	0	0.011764706	302.1687	985.7744	651.1724	0.3118	4.2142	1327	1.691332261	0.003906978	70.64527841	0.163190593
106.3798603	×ÔÉí³µÁ¾	Road 1	285.9364344	84.35530701	4.61E-06	0.269957036	0	0.011764706	302.544	985.7803	651.1532	0.3128	4.2133	1328	1.333631263	0.003080688	70.66753921	0.163242016
106.3965782	×ÔÉí³µÁ¾	Road 1	286.3282343	84.36945877	4.61E-06	0.346721649	0	0.011764706	303.0836	985.7891	651.1256	0.3138	4.2123	1329	1.573357133	0.003634455	70.69384242	0.163302776
106.4131751	×ÔÉí³µÁ¾	Road 1	286.7172496	84.38036957	4.61E-06	0.346122772	0	0.011764706	303.4121	985.7939	651.1088	0.3149	4.2112	1330	1.435644377	0.003316339	70.71766971	0.163357817
106.429838	×ÔÉí³µÁ¾	Road 1	287.1078553	84.38985901	4.61E-06	0.294408262	0	0.011764706	303.7407	985.7988	651.092	0.3159	4.2101	1331	1.371672	0.003168562	70.74052576	0.163410614
106.4465457	×ÔÉí³µÁ¾	Road 1	287.4995421	84.39693146	4.64E-06	0.257591516	0	0.011764706	304.0927	985.8047	651.0741	0.3164	4.2096	1332	1.265148889	0.002922494	70.7616634	0.163459442
106.4631804	×ÔÉí³µÁ¾	Road 1	287.8895546	84.40466309	4.64E-06	0.273298115	0	0.011764706	304.4918	985.8115	651.0536	0.3168	4.2092	1333	1.295493416	0.00299259	70.78321352	0.163509223
106.4799866	×ÔÉí³µÁ¾	Road 1	288.2836427	84.4161232	4.64E-06	0.290487796	0	0.011764706	304.9847	985.8193	651.0285	0.3179	4.2081	1334	1.453994706	0.003358728	70.80764969	0.163565671
106.4964798	×ÔÉí³µÁ¾	Road 1	288.6704234	84.42335358	4.64E-06	0.266900599	0	0.011764706	305.3134	985.8242	651.0117	0.319	4.207	1335	1.276451674	0.002948603	70.82870246	0.163614303
106.5132244	×ÔÉí³µÁ¾	Road 1	289.0631309	84.42975998	4.64E-06	0.242559195	0	0.011764706	305.6656	985.8301	650.9937	0.3195	4.2065	1336	1.235821142	0.002854747	70.84939585	0.163662104
106.5298122	×ÔÉí³µÁ¾	Road 1	289.4521997	84.43859024	4.64E-06	0.250086069	0	0.011764706	306.2057	985.8379	650.9662	0.3215	4.2045	1337	1.345178335	0.003107362	70.87170936	0.163713649
106.5464751	×ÔÉí³µÁ¾	Road 1	289.8430586	84.44456406	4.64E-06	0.25621286	0	0.011764706	306.5345	985.8438	650.9493	0.3216	4.2044	1338	1.218410703	0.002814529	70.89201162	0.163760547
106.5631948	×ÔÉí³µÁ¾	Road 1	290.2352808	84.45114212	4.64E-06	0.248987004	0	0.011764706	306.8867	985.8486	650.9313	0.3231	4.2029	1339	1.243966933	0.002873564	70.91281041	0.163808592
106.5798552	×ÔÉí³µÁ¾	Road 1	290.6261465	84.45903854	4.64E-06	0.236351877	0	0.011764706	307.38	985.8574	650.9061	0.3233	4.2027	1340	1.302831319	0.00300954	70.93451603	0.163858732
106.5965342	×ÔÉí³µÁ¾	Road 1	291.0174757	84.46440125	4.64E-06	0.238818988	0	0.011764706	307.7323	985.8623	650.8882	0.3248	4.2012	1341	1.191630467	0.002752666	70.95439128	0.163904644
106.6131674	×ÔÉí³µÁ¾	Road 1	291.4077547	84.46979828	4.64E-06	0.241899684	0	0.011764706	308.0612	985.8682	650.8713	0.3249	4.2011	1342	1.193840621	0.002757772	70.97424869	0.163950514
106.6298058	×ÔÉí³µÁ¾	Road 1	291.7981925	84.47809296	4.64E-06	0.239268512	0	0.011764706	308.578	985.876	650.8449	0.3265	4.1996	1343	1.320987867	0.003051482	70.99622775	0.164001286
106.6465431	×ÔÉí³µÁ¾	Road 1	292.190977	84.48329773	4.64E-06	0.235178009	0	0.011764706	308.907	985.8809	650.8281	0.3276	4.1985	1344	1.184123942	0.002735326	71.01604681	0.164047068
106.6631628	×ÔÉí³µÁ¾	Road 1	292.5810226	84.48817291	4.64E-06	0.234608367	0	0.011764706	309.2359	985.8867	650.8113	0.3277	4.1984	1345	1.171303527	0.002705711	71.03551347	0.164092036
106.6798678	×ÔÉí³µÁ¾	Road 1	292.9731084	84.49585648	4.64E-06	0.236881286	0	0.011764706	309.7294	985.8945	650.7861	0.3288	4.1972	1346	1.293038352	0.002986919	71.05711376	0.164141933
106.6965615	×ÔÉí³µÁ¾	Road 1	293.3649505	84.50084152	4.64E-06	0.236556351	0	0.011764706	310.0583	985.8994	650.7693	0.3299	4.1959	1347	1.175289687	0.002714919	71.07673369	0.164187255
106.7132285	×ÔÉí³µÁ¾	Road 1	293.7561915	84.50665741	4.69E-06	0.233864799	0	0.011764706	310.3874	985.9043	650.7525	0.331	4.1946	1348	1.212103137	0.002799958	71.09693574	0.164233922
106.7298243	×ÔÉí³µÁ¾	Road 1	294.1457957	84.51370239	4.69E-06	0.233729303	0	0.011764706	310.9044	985.9131	650.7261	0.3316	4.1939	1349	1.267358298	0.002927598	71.11796861	0.164282507
106.7465623	×ÔÉí³µÁ¾	Road 1	294.5387613	84.51856384	4.69E-06	0.234394208	0	0.011764706	311.2335	985.918	650.7093	0.3327	4.193	1350	1.169502194	0.00270155	71.1375438	0.164327726
106.7632025	×ÔÉí³µÁ¾	Road 1	294.9294521	84.52352829	4.69E-06	0.234334007	0	0.011764706	311.5626	985.9238	650.6924	0.3328	4.1931	1351	1.175321997	0.002714994	71.15710137	0.164372904
106.7797929	×ÔÉí³µÁ¾	Road 1	295.3190088	84.53141098	4.69E-06	0.233160257	0	0.011764706	312.0797	985.9316	650.6661	0.3343	4.1916	1352	1.304547099	0.003013504	71.17874424	0.164422899
106.7965188	×ÔÉí³µÁ¾	Road 1	295.7117734	84.53641663	4.69E-06	0.232950851	0	0.011764706	312.4089	985.9365	650.6493	0.3354	4.1905	1353	1.176137162	0.002716877	71.19841626	0.164468342
106.8132308	×ÔÉí³µÁ¾	Road 1	296.1042332	84.54123001	4.69E-06	0.234024569	0	0.011764706	312.738	985.9424	650.6324	0.3355	4.1904	1354	1.167964669	0.002697998	71.21793532	0.164513431
106.8298542	×ÔÉí³µÁ¾	Road 1	296.4946453	84.54889297	4.69E-06	0.233329877	0	0.011764706	313.2553	985.9502	650.606	0.3371	4.1888	1355	1.294408828	0.002990084	71.23945269	0.164563136
106.8466523	×ÔÉí³µÁ¾	Road 1	296.8891884	84.55417328	4.69E-06	0.233759567	0	0.011764706	313.608	985.9561	650.588	0.3376	4.1883	1356	1.187327967	0.002742728	71.25939763	0.164609209
106.8631525	×ÔÉí³µÁ¾	Road 1	297.2767551	84.55919952	4.69E-06	0.2330558	0	0.011764706	313.9372	985.9609	650.5712	0.3385	4.1872	1357	1.180278237	0.002726443	71.2788724	0.164654195
106.8797967	×ÔÉí³µÁ¾	Road 1	297.66773	84.56447983	4.69E-06	0.233919203	0	0.011764706	314.29	985.9668	650.5531	0.3389	4.1866	1358	1.189560891	0.002747886	71.29867171	0.164699932
106.896471	×ÔÉí³µÁ¾	Road 1	298.0594479	84.57247238	4.69E-06	0.233245239	0	0.011764706	314.8309	985.9756	650.5255	0.34	4.1856	1359	1.308102071	0.003021716	71.32048336	0.164750317
106.9131423	×ÔÉí³µÁ¾	Road 1	298.4511197	84.57738876	4.69E-06	0.233709633	0	0.011764706	315.1602	985.9805	650.5087	0.3412	4.1845	1360	1.173365069	0.002710473	71.34004493	0.164795504
106.9298467	×ÔÉí³µÁ¾	Road 1	298.8435899	84.58244247	4.69E-06	0.232965767	0	0.011764706	315.4895	985.9854	650.4919	0.3424	4.1834	1361	1.179000535	0.002723491	71.35973934	0.164840998
106.9465044	×ÔÉí³µÁ¾	Road 1	299.2349924	84.58803864	4.69E-06	0.23298052	0	0.011764706	315.8424	985.9912	650.4739	0.343	4.1828	1362	1.203480038	0.002780039	71.37978665	0.164887307
106.9631076	×ÔÉí³µÁ¾	Road 1	299.6251439	84.59506989	4.69E-06	0.23330991	0	0.011764706	316.3364	985.999	650.4486	0.3442	4.1817	1363	1.267547996	0.002928036	71.40083195	0.164935922
106.9798354	×ÔÉí³µÁ¾	Road 1	300.0182464	84.59986954	4.69E-06	0.233165354	0	0.011764706	316.6658	986.0039	650.4318	0.3453	4.1806	1364	1.167768121	0.002697544	71.42036613	0.164981046
106.9965111	×ÔÉí³µÁ¾	Road 1	300.4101504	84.60521851	4.69E-06	0.233275488	0	0.011764706	317.0187	986.0098	650.4138	0.3458	4.18	1365	1.192561405	0.002754817	71.44025297	0.165026984
107.0131465	×ÔÉí³µÁ¾	Road 1	300.8011343	84.61115112	4.69E-06	0.231991902	0	0.011764706	317.4187	986.0166	650.3934	0.3462	4.1796	1366	1.218844954	0.002815532	71.46052897	0.165073822
107.0314131	×ÔÉí³µÁ¾	Road 1	301.2304963	84.61912994	4.69E-06	0.232780799	0	0.011764706	317.9599	986.0254	650.3657	0.3473	4.1786	1367	1.277554199	0.00295115	71.48386553	0.165127729
107.046619	×ÔÉí³µÁ¾	Road 1	301.5879345	84.62387466	4.69E-06	0.23174198	0	0.011764706	318.2894	986.0303	650.3488	0.3484	4.1775	1368	1.186374172	0.002740524	71.50190536	0.165169401
107.063169	×ÔÉí³µÁ¾	Road 1	301.9769922	84.62880478	4.69E-06	0.231837228	0	0.011764706	318.6189	986.0352	650.332	0.3495	4.1763	1369	1.176083958	0.002716754	71.52136956	0.165214364
107.0797663	×ÔÉí³µÁ¾	Road 1	302.3671967	84.63644028	4.69E-06	0.22986418	0	0.011764706	319.1367	986.0439	650.3056	0.3501	4.1757	1370	1.294756915	0.002990888	71.54285902	0.165264004
107.0965531	×ÔÉí³µÁ¾	Road 1	302.7618794	84.64135666	4.69E-06	0.231581911	0	0.011764706	319.4898	986.0488	650.2875	0.3516	4.1742	1371	1.172541938	0.002708572	71.56254225	0.165309473
107.1132072	×ÔÉí³µÁ¾	Road 1	303.153465	84.64625244	4.77E-06	0.230063602	0	0.011764706	319.8194	986.0547	650.2707	0.3518	4.1741	1372	1.173394579	0.002710541	71.5820841	0.165354614
107.129803	×ÔÉí³µÁ¾	Road 1	303.5437058	84.6517868	4.82E-06	0.230249301	0	0.011764706	320.1725	986.0596	650.2527	0.3533	4.1725	1373	1.202354352	0.002777439	71.60203817	0.165400708
107.1465081	×ÔÉí³µÁ¾	Road 1	303.9365458	84.6584198	4.98E-06	0.228680938	0	0.011764706	320.6669	986.0684	650.2274	0.3535	4.1723	1374	1.248942075	0.002885056	71.62290182	0.165448903
107.1631692	×ÔÉí³µÁ¾	Road 1	304.3283733	84.66313019	5.06E-06	0.22950992	0	0.011764706	320.9965	986.0732	650.2106	0.3546	4.1712	1375	1.165337855	0.00269193	71.64231761	0.165493754
107.179802	×ÔÉí³µÁ¾	Road 1	304.7195692	84.67009277	5.22E-06	0.228420869	0	0.011764706	321.491	986.0811	650.1853	0.3558	4.1701	1376	1.264832487	0.002921763	71.66335538	0.165542351
107.1964965	×ÔÉí³µÁ¾	Road 1	305.1122354	84.67484436	5.33E-06	0.228135899	0	0.011764706	321.8206	986.0859	650.1685	0.3569	4.169	1377	1.166849975	0.002695423	71.68283528	0.165587349
107.2132045	×ÔÉí³µÁ¾	Road 1	305.5052455	84.68051605	5.42E-06	0.228505805	0	0.011764706	322.1739	986.0918	650.1505	0.3574	4.1684	1378	1.207034341	0.002788249	71.7030024	0.165633936
107.2298523	×ÔÉí³µÁ¾	Road 1	305.8968721	84.68680573	5.42E-06	0.227626458	0	0.011764706	322.6685	986.0996	650.1251	0.3586	4.1672	1379	1.235166632	0.002853235	71.72356531	0.165681436
107.2464676	×ÔÉí³µÁ¾	Road 1	306.2877522	84.69133759	5.45E-06	0.227396786	0	0.011764706	322.9982	986.1045	650.1083	0.3597	4.1661	1380	1.158333066	0.002675749	71.74281131	0.165725894
107.263143	×ÔÉí³µÁ¾	Road 1	306.6800785	84.69823837	5.45E-06	0.226927593	0	0.011764706	323.4928	986.1123	650.0831	0.3609	4.165	1381	1.261659569	0.002914434	71.76384995	0.165774493
107.2798066	×ÔÉí³µÁ¾	Road 1	307.07215	84.70281143	5.45E-06	0.22691299	0	0.011764706	323.8226	986.1182	650.0662	0.361	4.1648	1382	1.159679318	0.002678859	71.78317444	0.165819133
107.2965307	×ÔÉí³µÁ¾	Road 1	307.4656663	84.70750122	5.45E-06	0.226213843	0	0.011764706	324.1524	986.123	650.0494	0.3621	4.1637	1383	1.164109564	0.002689093	71.80264315	0.165864106
107.3131603	×ÔÉí³µÁ¾	Road 1	307.85698	84.71238327	5.45E-06	0.226188198	0	0.011764706	324.5058	986.1289	650.0313	0.3627	4.1632	1384	1.173790226	0.002711455	71.82216276	0.165909196
107.3297869	×ÔÉí³µÁ¾	Road 1	308.2482576	84.71953125	5.45E-06	0.225708738	0	0.011764706	325.0241	986.1367	650.0048	0.3643	4.1615	1385	1.273673771	0.002942186	71.84333965	0.165958115
107.3465081	×ÔÉí³µÁ¾	Road 1	308.6417818	84.72404251	5.45E-06	0.225239679	0	0.011764706	325.3539	986.1426	649.988	0.3644	4.1614	1386	1.156497407	0.002671509	71.86267766	0.166002785
107.3631699	×ÔÉí³µÁ¾	Road 1	309.0339293	84.7285675	5.45E-06	0.225684434	0	0.011764706	325.6838	986.1475	649.9711	0.3655	4.1603	1387	1.157850664	0.002674635	71.88196955	0.16604735
107.3797786	×ÔÉí³µÁ¾	Road 1	309.424859	84.73572922	5.45E-06	0.225365013	0	0.011764706	326.2022	986.1553	649.9447	0.3671	4.1587	1388	1.274805816	0.002944801	71.90314236	0.166096259
107.3964609	×ÔÉí³µÁ¾	Road 1	309.8175437	84.74021988	5.45E-06	0.224496096	0	0.011764706	326.5322	986.1611	649.9279	0.3672	4.1586	1389	1.156216887	0.002670861	71.92243076	0.166140815
107.4138734	×ÔÉí³µÁ¾	Road 1	310.2274491	84.74704514	5.45E-06	0.225354746	0	0.011764706	327.0507	986.1689	649.9013	0.3687	4.157	1390	1.246206881	0.002878738	71.94413036	0.166190941
107.4298237	×ÔÉí³µÁ¾	Road 1	310.6029534	84.75161133	5.42E-06	0.224250779	0	0.011764706	327.3806	986.1748	649.8845	0.3688	4.1568	1391	1.168848089	0.002700039	71.96277387	0.166234008
107.4798169	×ÔÉí³µÁ¾	Road 1	311.780112	84.76706772	5.42E-06	0.224825069	0	0.011764706	328.5357	986.1924	649.8254	0.3721	4.1534	1392	1.185762991	0.002739113	72.02205387	0.166370944
107.4966194	×ÔÉí³µÁ¾	Road 1	312.1757728	84.77151031	5.42E-06	0.223111823	0	0.011764706	328.8657	986.1982	649.8086	0.3722	4.1533	1393	1.153026458	0.002663491	72.04142767	0.166415698
107.5131299	×ÔÉí³µÁ¾	Road 1	312.5645761	84.77624817	5.06E-06	0.223896518	0	0.011764706	329.2194	986.2031	649.7905	0.3737	4.1517	1394	1.1696027	0.002701782	72.06073831	0.166460305
107.5297843	×ÔÉí³µÁ¾	Road 1	312.9568042	84.78328629	4.98E-06	0.223666683	0	0.011764706	329.7381	986.2119	649.764	0.3743	4.1511	1395	1.26904673	0.002931498	72.08187362	0.166509128
107.5465048	×ÔÉí³µÁ¾	Road 1	313.3506078	84.78791428	4.95E-06	0.223846585	0	0.011764706	330.0917	986.2178	649.746	0.3749	4.1505	1396	1.162266907	0.002684837	72.10130725	0.16655402
107.5631882	×ÔÉí³µÁ¾	Road 1	313.7435612	84.79262466	4.95E-06	0.222782284	0	0.011764706	330.4219	986.2227	649.7291	0.3759	4.1494	1397	1.166383771	0.002694347	72.12076654	0.166598971
107.57978	×ÔÉí³µÁ¾	Road 1	314.1343853	84.79892807	4.90E-06	0.223806635	0	0.011764706	330.9171	986.2305	649.7038	0.3771	4.1482	1398	1.237947112	0.002859658	72.14130631	0.166646418
107.5965199	×ÔÉí³µÁ¾	Road 1	314.5287185	84.80341187	4.90E-06	0.221848533	0	0.011764706	331.2473	986.2354	649.6869	0.3782	4.1471	1399	1.15587659	0.002670075	72.16065555	0.166691114
107.6130989	×ÔÉí³µÁ¾	Road 1	314.9192807	84.80767593	4.90E-06	0.223366827	0	0.011764706	331.5775	986.2412	649.67	0.3783	4.147	1400	1.148112044	0.002652139	72.17969007	0.166735084
107.6298094	×ÔÉí³µÁ¾	Road 1	315.3129648	84.81240692	4.90E-06	0.223306909	0	0.011764706	331.9312	986.2471	649.652	0.3788	4.1464	1401	1.167153464	0.002696125	72.19919386	0.166780138
107.646524	×ÔÉí³µÁ¾	Road 1	315.7067685	84.81769409	4.90E-06	0.222877368	0	0.011764706	332.3322	986.2529	649.6315	0.3802	4.1451	1402	1.191546553	0.002752473	72.21911007	0.166826144
107.6631408	×ÔÉí³µÁ¾	Road 1	316.0982929	84.82344818	4.90E-06	0.222632632	0	0.011764706	332.7568	986.2598	649.6099	0.381	4.1442	1403	1.213569377	0.002803345	72.23927562	0.166872727
107.6797659	×ÔÉí³µÁ¾	Road 1	316.4900374	84.8280899	4.90E-06	0.222153306	0	0.011764706	333.1107	986.2656	649.5918	0.3816	4.1437	1404	1.164444143	0.002689866	72.25863468	0.166917446
107.6967034	×ÔÉí³µÁ¾	Road 1	316.8891712	84.83455124	4.90E-06	0.222367942	0	0.011764706	333.6061	986.2734	649.5664	0.3827	4.1425	1405	1.239492542	0.002863228	72.27962854	0.166965942
107.7131053	×ÔÉí³µÁ¾	Road 1	317.2757062	84.83919983	4.90E-06	0.222742185	0	0.011764706	333.9601	986.2783	649.5483	0.3842	4.141	1406	1.167650236	0.002697272	72.29878025	0.167010182
107.7298008	×ÔÉí³µÁ¾	Road 1	317.6691913	84.84583969	4.87E-06	0.22208862	0	0.011764706	334.4555	986.2871	649.5231	0.3844	4.1409	1407	1.251510629	0.00289099	72.31967488	0.167058449
107.7465154	×ÔÉí³µÁ¾	Road 1	318.0631459	84.85019302	4.87E-06	0.222058669	0	0.011764706	334.7859	986.292	649.5062	0.3855	4.1398	1408	1.150922796	0.002658632	72.33891209	0.167102887
107.7630992	×ÔÉí³µÁ¾	Road 1	318.4540456	84.85659256	4.82E-06	0.222278073	0	0.011764706	335.2815	986.2998	649.4808	0.3866	4.1386	1409	1.242970951	0.002871263	72.35952519	0.167150503
107.7798105	×ÔÉí³µÁ¾	Road 1	318.8479724	84.86094589	4.82E-06	0.221853301	0	0.011764706	335.6118	986.3047	649.464	0.3877	4.1376	1410	1.151068338	0.002658968	72.37876103	0.167194938
107.7964635	×ÔÉí³µÁ¾	Road 1	319.2405458	84.86538849	4.82E-06	0.222408444	0	0.011764706	335.9423	986.3105	649.4471	0.3878	4.1374	1411	1.155712539	0.002669696	72.39800713	0.167239396
107.8131891	×ÔÉí³µÁ¾	Road 1	319.6348599	84.87178116	4.79E-06	0.220919698	0	0.011764706	336.4379	986.3184	649.4218	0.389	4.1363	1412	1.240438178	0.002865412	72.41875419	0.167287322
107.8297871	×ÔÉí³µÁ¾	Road 1	320.0261866	84.87610703	4.77E-06	0.222602397	0	0.011764706	336.7684	986.3232	649.4049	0.3901	4.1352	1413	1.151310579	0.002659527	72.43786368	0.167331465
107.8464786	×ÔÉí³µÁ¾	Road 1	320.4197473	84.88262329	4.69E-06	0.222188205	0	0.011764706	337.2641	986.3311	649.3796	0.3913	4.1341	1414	1.246562267	0.002879559	72.45867067	0.167379529
107.8630909	×ÔÉí³µÁ¾	Road 1	320.811451	84.88478622	4.64E-06	0.221264273	0	0.011764706	337.4293	986.334	649.3712	0.3914	4.134	1415	1.055725274	0.002438725	72.47620872	0.167420042
107.8798209	×ÔÉí³µÁ¾	Road 1	321.2059541	84.89012833	4.56E-06	0.221908435	0	0.011764706	337.8307	986.3398	649.3506	0.3928	4.1326	1416	1.194503029	0.002759302	72.49619274	0.167466205
107.8964178	×ÔÉí³µÁ¾	Road 1	321.5973438	84.89540176	4.51E-06	0.22143966	0	0.011764706	338.232	986.3467	649.3302	0.3933	4.1322	1417	1.193401586	0.002756758	72.51599955	0.167511959
107.9131002	×ÔÉí³µÁ¾	Road 1	321.9907713	84.90051041	4.46E-06	0.222497761	0	0.011764706	338.6334	986.3525	649.3096	0.3947	4.1308	1418	1.185014443	0.002737383	72.53576836	0.167557625
107.9297909	×ÔÉí³µÁ¾	Road 1	322.3844206	84.90547485	4.39E-06	0.221643612	0	0.011764706	339.0112	986.3584	649.2903	0.3957	4.1298	1419	1.178614023	0.002722598	72.55544033	0.167603067
107.9464905	×ÔÉí³µÁ¾	Road 1	322.7783016	84.91070023	4.36E-06	0.222462878	0	0.011764706	339.4126	986.3652	649.2698	0.3962	4.1294	1420	1.19001776	0.002748941	72.57531311	0.167648973
107.9631717	×ÔÉí³µÁ¾	Road 1	323.1717733	84.91564407	4.29E-06	0.221199572	0	0.011764706	339.7905	986.3711	649.2505	0.3972	4.1285	1421	1.177937805	0.002721036	72.59496257	0.167694364
107.9798108	×ÔÉí³µÁ¾	Road 1	323.5642753	84.92096558	4.22E-06	0.222178206	0	0.011764706	340.1919	986.3779	649.23	0.3977	4.128	1422	1.195199715	0.002760911	72.6148496	0.167740303
107.9964495	×ÔÉí³µÁ¾	Road 1	323.9567923	84.92610168	4.22E-06	0.221144438	0	0.011764706	340.5934	986.3838	649.2095	0.3991	4.1266	1423	1.187081841	0.002742159	72.63460111	0.167785929
108.0131161	×ÔÉí³µÁ¾	Road 1	324.3500021	84.93379211	4.15E-06	0.221913502	0	0.011764706	341.1839	986.3936	649.1794	0.4	4.1257	1424	1.299267245	0.003001307	72.65625545	0.16783595
108.0297911	×ÔÉí³µÁ¾	Road 1	324.7434313	84.93820038	4.08E-06	0.221314207	0	0.011764706	341.5146	986.3984	649.1625	0.4012	4.1246	1425	1.15467722	0.002667304	72.6755097	0.167880427
108.0464192	×ÔÉí³µÁ¾	Road 1	325.1357715	84.94211426	3.98E-06	0.197657347	0	0.019607844	341.8453	986.4033	649.1456	0.4023	4.1235	1426	1.133440003	0.002618246	72.69435664	0.167923964
108.063173	×ÔÉí³µÁ¾	Road 1	325.5310704	84.94039764	3.92E-06	0.011331598	0	0.035294119	342.3414	986.4121	649.1202	0.4025	4.1233	1427	0.960647537	0.002219096	72.71045115	0.167961142
108.0797883	×ÔÉí³µÁ¾	Road 1	325.9230547	84.93059235	3.83E-06	-0.115284123	0	0.050980393	342.6721	986.417	649.1033	0.4036	4.1221	1428	0.960571274	0.00221892	72.72641129	0.16799801
108.0965498	×ÔÉí³µÁ¾	Road 1	326.3183739	84.90576324	3.67E-06	-0.216599762	0	0.06666667	343.168	986.4248	649.0779	0.4048	4.1209	1429	0.960378159	0.002218474	72.74250868	0.168035195
108.1130932	×ÔÉí³µÁ¾	Road 1	326.708444	84.88288422	3.46E-06	-0.383692533	0	0.090196081	343.4986	986.4297	649.0611	0.406	4.1197	1430	0.960200211	0.002218062	72.75839367	0.168071889
108.129784	×ÔÉí³µÁ¾	Road 1	327.1018475	84.85243835	3.27E-06	-0.530700386	0	0.098039217	343.829	986.4355	649.0443	0.4061	4.1196	1431	0.959963409	0.002217515	72.77441619	0.168108901
108.1466144	×ÔÉí³µÁ¾	Road 1	327.4982941	84.79928513	2.98E-06	-0.569948733	0	0.105882354	344.3244	986.4434	649.0189	0.4073	4.1184	1432	0.959549995	0.00221656	72.79056583	0.168146207
108.1631138	×ÔÉí³µÁ¾	Road 1	327.8867718	84.76171188	2.72E-06	-0.571546972	0	0.121568628	344.6781	986.4482	649.0009	0.4088	4.1168	1433	0.959257759	0.002215885	72.80639303	0.168182768
108.1965859	×ÔÉí³µÁ¾	Road 1	328.6742954	84.70000305	2.43E-06	-0.812807322	0	0.137254909	345.1729	986.4561	648.9756	0.41	4.1156	1434	0.958777802	0.002214777	72.83848531	0.168256901
108.2131586	×ÔÉí³µÁ¾	Road 1	329.0636985	84.58780518	2.08E-06	-0.822890878	0	0.145098045	345.9026	986.4678	648.9383	0.4115	4.114	1435	0.957905151	0.002212761	72.85436042	0.168293573
108.2297629	×ÔÉí³µÁ¾	Road 1	329.4536202	84.53962326	1.48E-06	-0.863423288	0	0.168627456	346.2319	986.4736	648.9215	0.4116	4.1138	1436	0.957530403	0.002211895	72.87025951	0.168330299
108.2464023	×ÔÉí³µÁ¾	Road 1	329.8441069	84.48308487	1.18E-06	-1.101655483	0	0.176470593	346.5609	986.4785	648.9047	0.4127	4.1127	1437	0.95709066	0.002210879	72.88618497	0.168367087
108.2631041	×ÔÉí³µÁ¾	Road 1	330.2355532	84.37471848	9.62E-07	-1.273642659	0	0.184313729	347.0775	986.4863	648.8783	0.4142	4.1111	1438	0.95624781	0.002208932	72.90215599	0.16840398
108.2797985	×ÔÉí³µÁ¾	Road 1	330.6265071	84.3056076	7.64E-07	-1.205868483	0	0.200000003	347.4058	986.4922	648.8615	0.4143	4.111	1439	0.955710281	0.002207691	72.91811104	0.168440836
108.2964321	×ÔÉí³µÁ¾	Road 1	331.0157184	84.23683319	5.88E-07	-1.283556938	0	0.215686277	347.7339	986.4971	648.8448	0.4154	4.1099	1440	0.955175369	0.002206455	72.93399903	0.168477538
108.3131376	×ÔÉí³µÁ¾	Road 1	331.4060499	84.11597672	4.52E-07	-1.629237294	0	0.23137255	348.2255	986.5049	648.8197	0.4165	4.1087	1441	0.954235374	0.002204284	72.94993994	0.168514361
108.3300637	×ÔÉí³µÁ¾	Road 1	331.8011082	84.02467346	3.53E-07	-1.68220067	0	0.239215687	348.5528	986.5098	648.8029	0.4175	4.1076	1442	0.953525238	0.002202643	72.9660794	0.168551643
108.3465411	×ÔÉí³µÁ¾	Road 1	332.1852798	83.93405685	2.73E-07	-1.666059732	0	0.262745112	348.8798	986.5156	648.7862	0.4176	4.1076	1443	0.952820442	0.002201015	72.98177943	0.16858791
108.3639349	×ÔÉí³µÁ¾	Road 1	332.5900871	83.78297424	2.22E-07	-1.910204172	0	0.278431386	349.3929	986.5234	648.76	0.419	4.1061	1444	0.951645355	0.002198301	72.99833218	0.168626147
108.3797859	×ÔÉí³µÁ¾	Road 1	332.9585143	83.67541122	1.79E-07	-2.068989754	0	0.294117659	349.7188	986.5283	648.7434	0.42	4.1051	1445	0.950808754	0.002196368	73.01340344	0.168660962
108.396668	×ÔÉí³µÁ¾	Road 1	333.3500967	83.50241089	1.43E-07	-2.235877514	0	0.31764707	350.207	986.5361	648.7184	0.4211	4.1041	1446	0.949463196	0.00219326	73.02943238	0.168697989
108.4131568	×ÔÉí³µÁ¾	Road 1	333.7319566	83.37148819	1.24E-07	-2.324160099	0	0.325490206	350.5551	986.542	648.7006	0.4215	4.1037	1447	0.948444908	0.002190908	73.0450711	0.168734114
108.4297497	×ÔÉí³µÁ¾	Road 1	334.1156519	83.24665604	1.15E-07	-2.367402315	0	0.34117648	350.8794	986.5469	648.6841	0.4225	4.1027	1448	0.947473991	0.002188665	73.06079244	0.168770431
108.4464559	×ÔÉí³µÁ¾	Road 1	334.5013715	83.11845245	1.15E-07	-2.446908474	0	0.349019617	351.2032	986.5518	648.6675	0.4235	4.1017	1449	0.946476852	0.002186362	73.07660443	0.168806956
108.4631723	×ÔÉí³µÁ¾	Road 1	334.8863632	82.91068039	1.15E-07	-2.503564835	0	0.349019617	351.7111	986.5605	648.6416	0.4239	4.1013	1450	0.944860847	0.002182629	73.09239913	0.168843442
108.4797135	×ÔÉí³µÁ¾	Road 1	335.266717	82.7795105	1.15E-07	-2.443465471	0	0.349019617	352.0337	986.5654	648.6252	0.4248	4.1004	1451	0.943840637	0.002180272	73.1080114	0.168879506
108.4964853	×ÔÉí³µÁ¾	Road 1	335.6515131	82.59507751	1.15E-07	-2.421068907	0	0.349019617	352.3557	986.5703	648.6086	0.4258	4.0994	1452	0.942406158	0.002176958	73.12381722	0.168916018
108.5131804	×ÔÉí³µÁ¾	Road 1	336.0339091	82.45653992	1.15E-07	-2.434882641	0	0.34117648	352.8378	986.5781	648.584	0.4267	4.0985	1453	0.941328644	0.002174469	73.13953286	0.168952321
108.5299101	×ÔÉí³µÁ¾	Road 1	336.4165033	82.32935257	1.15E-07	-2.365707397	0	0.34117648	353.1586	986.583	648.5677	0.4276	4.0976	1454	0.940339409	0.002172184	73.15526439	0.168988661
108.5466511	×ÔÉí³µÁ¾	Road 1	336.7987358	82.19569016	1.15E-07	-2.320420504	0	0.333333343	353.5017	986.5889	648.5502	0.4279	4.0972	1455	0.939299812	0.002169783	73.17098919	0.169024985
108.563075	×ÔÉí³µÁ¾	Road 1	337.1728919	82.01223221	1.15E-07	-2.264643431	0	0.325490206	353.9812	986.5957	648.5256	0.4298	4.0954	1456	0.937872917	0.002166486	73.18639274	0.169060567
108.5797892	×ÔÉí³µÁ¾	Road 1	337.5530677	81.88431702	1.22E-07	-2.201284885	0	0.31764707	354.323	986.6016	648.5082	0.4301	4.0951	1457	0.936878021	0.002164188	73.20205193	0.16909674
108.5965298	×ÔÉí³µÁ¾	Road 1	337.9333061	81.76865845	1.24E-07	-2.129050016	0	0.309803933	354.6416	986.6064	648.4919	0.431	4.0942	1458	0.935978455	0.00216211	73.21772079	0.169132935
108.6130853	×ÔÉí³µÁ¾	Road 1	338.3085056	81.5872467	1.29E-07	-1.955463052	0	0.286274523	355.164	986.6152	648.4653	0.4317	4.0935	1459	0.934567474	0.002158851	73.23319303	0.169168676
108.6297981	×ÔÉí³µÁ¾	Road 1	338.6868023	81.48671494	1.29E-07	-1.77103579	0	0.262745112	355.4814	986.6201	648.449	0.4326	4.0926	1460	0.933785561	0.002157045	73.24879916	0.169204726
108.646494	×ÔÉí³µÁ¾	Road 1	339.0642979	81.39629059	1.31E-07	-1.556904435	0	0.239215687	355.7985	986.625	648.4328	0.4335	4.0918	1461	0.93308226	0.00215542	73.26437781	0.169240713
108.6631507	×ÔÉí³µÁ¾	Road 1	339.4403402	81.27384796	1.43E-07	-1.324584007	0	0.223529413	356.2961	986.6328	648.4074	0.4348	4.0906	1462	0.932129929	0.00215322	73.279904	0.169276578
108.6797883	×ÔÉí³µÁ¾	Road 1	339.8156149	81.20087128	1.54E-07	-1.303868532	0	0.200000003	356.6124	986.6377	648.3912	0.4357	4.0898	1463	0.931562332	0.002151909	73.29540297	0.169312381
108.6963826	×ÔÉí³µÁ¾	Road 1	340.1895922	81.1310463	1.70E-07	-1.18669641	0	0.184313729	356.9284	986.6426	648.3751	0.4366	4.0889	1464	0.931019249	0.002150654	73.31085265	0.16934807
108.7131764	×ÔÉí³µÁ¾	Road 1	340.5676439	81.0411438	1.84E-07	-0.963024676	0	0.176470593	357.402	986.6504	648.3509	0.4374	4.0882	1465	0.930320007	0.002149039	73.32647623	0.16938416
108.7297631	×ÔÉí³µÁ¾	Road 1	340.9407636	80.98257294	2.09E-07	-0.958464324	0	0.168627456	357.7399	986.6553	648.3336	0.4387	4.0869	1466	0.929864456	0.002147987	73.34189958	0.169419788
108.7465352	×ÔÉí³µÁ¾	Road 1	341.3177548	80.91799393	2.47E-07	-0.988460124	0	0.168627456	358.1001	986.6611	648.3152	0.4394	4.0862	1467	0.929362175	0.002146827	73.35748697	0.169455795
108.763153	×ÔÉí³µÁ¾	Road 1	341.6910096	80.85999985	2.84E-07	-0.99860388	0	0.160784319	358.415	986.666	648.2991	0.4403	4.0854	1468	0.92891111	0.002145785	73.37292345	0.169491453
108.7798555	×ÔÉí³µÁ¾	Road 1	342.065792	80.77934647	3.39E-07	-0.889621079	0	0.160784319	358.887	986.6738	648.275	0.4411	4.0847	1469	0.928283806	0.002144336	73.38842811	0.169527269
108.796418	×ÔÉí³µÁ¾	Road 1	342.4371797	80.72439423	4.00E-07	-0.884361744	0	0.152941182	359.2239	986.6787	648.2578	0.4423	4.0834	1470	0.9278564	0.002143348	73.40379571	0.169562768
108.8130842	×ÔÉí³µÁ¾	Road 1	342.8106584	80.67362366	4.52E-07	-0.852009892	0	0.145098045	359.5381	986.6836	648.2418	0.4432	4.0826	1471	0.927461517	0.002142436	73.41925297	0.169598474
108.8324006	×ÔÉí³µÁ¾	Road 1	343.2431526	80.60396347	5.08E-07	-0.729900301	0	0.137254909	360.009	986.6914	648.2177	0.4439	4.0819	1472	0.926919716	0.002141185	73.43715774	0.169639834
108.8470838	×ÔÉí³µÁ¾	Road 1	343.5717377	80.56222916	6.01E-07	-0.67085892	0	0.129411772	360.3228	986.6963	648.2017	0.4448	4.0811	1473	0.926595116	0.002140435	73.45076306	0.169671263
108.8631052	×ÔÉí³µÁ¾	Road 1	343.9300049	80.5022438	7.04E-07	-0.66845727	0	0.129411772	360.7931	986.7041	648.1777	0.4456	4.0803	1474	0.926128563	0.002139357	73.46560097	0.169705538
108.8797656	×ÔÉí³µÁ¾	Road 1	344.3023694	80.46127853	8.02E-07	-0.678755105	0	0.121568628	361.1064	986.709	648.1617	0.4464	4.0795	1475	0.925809944	0.002138621	73.48102528	0.169741168
108.8965886	×ÔÉí³µÁ¾	Road 1	344.6781868	80.42173462	9.10E-07	-0.624713361	0	0.121568628	361.4196	986.7139	648.1457	0.4472	4.0787	1476	0.92550238	0.00213791	73.4965951	0.169777135
108.9131167	×ÔÉí³µÁ¾	Road 1	345.0471598	80.36674805	1.05E-06	-0.592966139	0	0.121568628	361.8891	986.7217	648.1217	0.4479	4.078	1477	0.925074707	0.002136923	73.51188475	0.169812454
108.9298353	×ÔÉí³µÁ¾	Road 1	345.4202139	80.32925034	1.18E-06	-0.631271064	0	0.121568628	362.2019	986.7266	648.1057	0.4487	4.0772	1478	0.924783058	0.002136249	73.52734585	0.169848169
108.94654	×ÔÉí³µÁ¾	Road 1	345.7927539	80.28544235	1.32E-06	-0.605860293	0	0.105882354	362.5146	986.7314	648.0897	0.4495	4.0764	1479	0.924442329	0.002135462	73.54278838	0.169883841
108.963175	×ÔÉí³µÁ¾	Road 1	346.1635259	80.23895645	1.42E-06	-0.410936534	0	0.105882354	363.028	986.7393	648.0635	0.451	4.0749	1480	0.924080772	0.002134627	73.55816051	0.169919351
108.9797599	×ÔÉí³µÁ¾	Road 1	346.5330531	80.21172409	1.55E-06	-0.420244932	0	0.098039217	363.3404	986.7441	648.0475	0.4518	4.0741	1481	0.923868965	0.002134137	73.57348272	0.169954745
108.9965456	×ÔÉí³µÁ¾	Road 1	346.9069253	80.18369522	1.69E-06	-0.405906647	0	0.082352944	363.6526	986.749	648.0316	0.4525	4.0733	1482	0.923650963	0.002133634	73.58898685	0.16999056
109.0131091	×ÔÉí³µÁ¾	Road 1	347.2757448	80.16085052	1.80E-06	-0.218312472	0	0.05882353	363.9648	986.7539	648.0156	0.4533	4.0725	1483	0.923473282	0.002133223	73.60428287	0.170025893
109.0297669	×ÔÉí³µÁ¾	Road 1	347.6466087	80.14935608	1.94E-06	0.158832997	0	0.035294119	364.4774	986.7627	647.9894	0.4538	4.072	1484	0.923383881	0.002133017	73.61966439	0.170061425
109.0464746	×ÔÉí³µÁ¾	Road 1	348.0186008	80.15329742	2.04E-06	0.238029644	0	0.019607844	364.7895	986.7676	647.9735	0.4545	4.0712	1485	1.086815035	0.002510543	73.6378225	0.17010337
109.0630726	×ÔÉí³µÁ¾	Road 1	348.3881796	80.15912018	2.13E-06	0.249201342	0	0.011764706	365.1016	986.7725	647.9576	0.4553	4.0704	1486	1.166468682	0.002694543	73.65718358	0.170148094
109.0798121	×ÔÉí³µÁ¾	Road 1	348.7609491	80.16778564	2.17E-06	0.251279175	0	0.011764706	365.436	986.7773	647.9406	0.4565	4.0692	1487	1.282150422	0.002961767	73.67864616	0.170197673
109.0964494	×ÔÉí³µÁ¾	Road 1	349.1314711	80.17426758	2.19E-06	0.242873684	0	0.011764706	365.9042	986.7852	647.9166	0.4571	4.0685	1488	1.193509086	0.002757006	73.69850287	0.170243542
109.113124	×ÔÉí³µÁ¾	Road 1	349.5028508	80.17965775	2.19E-06	0.240606293	0	0.011764706	366.2164	986.79	647.9006	0.4579	4.0678	1489	1.147599134	0.002650954	73.71763867	0.170287745
109.1297389	×ÔÉí³µÁ¾	Road 1	349.8729293	80.18605042	2.19E-06	0.24517104	0	0.011764706	366.5508	986.7949	647.8835	0.459	4.0666	1490	1.190281046	0.002749549	73.73741506	0.170333429
109.1464949	×ÔÉí³µÁ¾	Road 1	350.2461906	80.19453735	2.19E-06	0.248881653	0	0.011764706	367.0192	986.8027	647.8596	0.4597	4.0659	1491	1.274741781	0.002944654	73.75877465	0.170382769
109.1631135	×ÔÉí³µÁ¾	Road 1	350.6164166	80.20032578	2.19E-06	0.244501829	0	0.011764706	367.3314	986.8076	647.8436	0.4604	4.0651	1492	1.165182025	0.00269157	73.7781383	0.170427499
109.1797998	×ÔÉí³µÁ¾	Road 1	350.988181	80.20628586	2.19E-06	0.24085106	0	0.011764706	367.666	986.8125	647.8266	0.4616	4.0639	1493	1.171395378	0.002705923	73.79768463	0.170472652
109.1964158	×ÔÉí³µÁ¾	Road 1	351.3584078	80.21289825	2.19E-06	0.24364756	0	0.011764706	368.0452	986.8184	647.8072	0.4626	4.0629	1494	1.19972745	0.00277137	73.81761929	0.170518701
109.213089	×ÔÉí³µÁ¾	Road 1	351.7299433	80.22034149	2.19E-06	0.246474758	0	0.011764706	368.4468	986.8252	647.7867	0.463	4.0624	1495	1.233407722	0.002849172	73.83818411	0.170566205
109.229863	×ÔÉí³µÁ¾	Road 1	352.103763	80.22850571	2.19E-06	0.244117185	0	0.011764706	368.893	986.832	647.7639	0.4642	4.0611	1496	1.261440643	0.002913928	73.85934349	0.170615083
109.2464779	×ÔÉí³µÁ¾	Road 1	352.4740631	80.23406067	2.19E-06	0.241914749	0	0.011764706	369.2054	986.8369	647.7479	0.465	4.0603	1497	1.155857077	0.00267003	73.87854793	0.170659446
109.2631081	×ÔÉí³µÁ¾	Road 1	352.844735	80.24028168	2.19E-06	0.242389336	0	0.011764706	369.5624	986.8428	647.7297	0.4656	4.0597	1498	1.183478968	0.002733836	73.89822952	0.17070491
109.2797582	×ÔÉí³µÁ¾	Road 1	353.2158895	80.24923553	2.19E-06	0.244252339	0	0.011764706	370.0534	986.8506	647.7047	0.4666	4.0586	1499	1.297087479	0.002996272	73.91982613	0.170754798
109.2964131	×ÔÉí³µÁ¾	Road 1	353.5871763	80.25488663	2.19E-06	0.243034065	0	0.011764706	370.3658	986.8555	647.6887	0.4674	4.0578	1500	1.159525862	0.002678505	73.93913785	0.170799408
109.3130587	×ÔÉí³µÁ¾	Road 1	353.9582973	80.2632019	2.19E-06	0.241715029	0	0.011764706	370.8346	986.8633	647.6647	0.4681	4.0572	1501	1.270752527	0.002935438	73.9602904	0.170848271
109.3298144	×ÔÉí³µÁ¾	Road 1	354.3318954	80.26863327	2.19E-06	0.242728561	0	0.011764706	371.1471	986.8682	647.6487	0.4688	4.0564	1502	1.149161146	0.002654562	73.97954534	0.17089275
109.3464333	×ÔÉí³µÁ¾	Road 1	354.7024726	80.27462769	2.19E-06	0.243103355	0	0.011764706	371.4819	986.873	647.6317	0.47	4.0552	1503	1.174576512	0.002713272	73.99906553	0.170937841
109.3630739	×ÔÉí³µÁ¾	Road 1	355.0735712	80.28310089	2.19E-06	0.242029697	0	0.011764706	371.9508	986.8809	647.6077	0.4707	4.0546	1504	1.277684	0.00295145	74.0203269	0.170986955
109.3797159	×ÔÉí³µÁ¾	Road 1	355.4447281	80.28864212	2.19E-06	0.241575837	0	0.011764706	372.2634	986.8857	647.5918	0.4714	4.0538	1505	1.155488683	0.002669179	74.03955656	0.171031376
109.3964858	×ÔÉí³µÁ¾	Road 1	355.8187632	80.29404602	2.19E-06	0.24177976	0	0.011764706	372.576	986.8906	647.5757	0.4722	4.053	1506	1.148101862	0.002652115	74.05881016	0.171075851
109.4131249	×ÔÉí³µÁ¾	Road 1	356.1899182	80.3023613	2.19E-06	0.242164552	0	0.011764706	373.0449	986.8975	647.5518	0.4738	4.0514	1507	1.271363614	0.00293685	74.07996449	0.171124718
109.4297809	×ÔÉí³µÁ¾	Road 1	356.5614753	80.30801239	2.19E-06	0.241490319	0	0.011764706	373.3576	986.9023	647.5358	0.4746	4.0506	1508	1.160079295	0.002679783	74.0992867	0.171169352
109.4463972	×ÔÉí³µÁ¾	Road 1	356.9321748	80.31351929	2.19E-06	0.241026163	0	0.011764706	373.6703	986.9082	647.5199	0.4744	4.0508	1509	1.154676644	0.002667303	74.11847322	0.171213673
109.4630513	×ÔÉí³µÁ¾	Road 1	357.3037549	80.32180023	2.19E-06	0.242089614	0	0.011764706	374.1394	986.915	647.4959	0.476	4.0492	1510	1.269854924	0.002933365	74.13962153	0.171262526
109.4797762	×ÔÉí³µÁ¾	Road 1	357.6769385	80.32720413	2.19E-06	0.241215587	0	0.011764706	374.4521	986.9199	647.4799	0.4769	4.0484	1511	1.1490551	0.002654317	74.15883931	0.171306919
109.4964823	×ÔÉí³µÁ¾	Road 1	358.0497305	80.33271103	2.19E-06	0.241599858	0	0.011764706	374.7649	986.9248	647.4639	0.4777	4.0477	1512	1.153644102	0.002664918	74.17811228	0.171351439
109.5131079	×ÔÉí³µÁ¾	Road 1	358.4207522	80.3390213	2.19E-06	0.241165951	0	0.011764706	375.1223	986.9307	647.4457	0.4783	4.047	1513	1.188367986	0.00274513	74.19786951	0.171397079
109.5298016	×ÔÉí³µÁ¾	Road 1	358.7933372	80.34803696	2.19E-06	0.24086076	0	0.011764706	375.6363	986.9385	647.4194	0.4798	4.0456	1514	1.299909626	0.003002791	74.21956981	0.171447206
109.5464868	×ÔÉí³µÁ¾	Road 1	359.1657614	80.35393524	2.19E-06	0.241115734	0	0.011764706	375.9714	986.9443	647.4023	0.4801	4.0454	1515	1.17044411	0.002703726	74.23909899	0.171492319
109.5630464	×ÔÉí³µÁ¾	Road 1	359.535405	80.3595314	2.19E-06	0.240371302	0	0.011764706	376.2843	986.9492	647.3864	0.4809	4.0446	1516	1.159699184	0.002678905	74.25830308	0.17153668
109.5797797	×ÔÉí³µÁ¾	Road 1	359.9089648	80.36765442	2.19E-06	0.241055816	0	0.011764706	376.7537	986.9561	647.3623	0.4826	4.043	1517	1.262220297	0.002915729	74.27942417	0.17158547
109.5965236	×ÔÉí³µÁ¾	Road 1	360.2827878	80.37322998	2.19E-06	0.240751222	0	0.011764706	377.0666	986.9619	647.3464	0.4824	4.0432	1518	1.156406621	0.002671299	74.29878695	0.171630198
109.6131029	×ÔÉí³µÁ¾	Road 1	360.6529616	80.37871628	2.19E-06	0.241140813	0	0.011764706	377.3795	986.9668	647.3304	0.4832	4.0424	1519	1.155021509	0.0026681	74.31793644	0.171674433
109.6297468	×ÔÉí³µÁ¾	Road 1	361.0246023	80.3844635	2.19E-06	0.24054122	0	0.011764706	377.7148	986.9717	647.3132	0.4844	4.0412	1520	1.165081369	0.002691338	74.33732788	0.171719227
109.6464724	×ÔÉí³µÁ¾	Road 1	361.398107	80.39277878	2.19E-06	0.239832506	0	0.011764706	378.1843	986.9795	647.2893	0.4852	4.0405	1521	1.270661686	0.002935228	74.35858044	0.171768321
109.6631257	×ÔÉí³µÁ¾	Road 1	361.7700242	80.39822388	2.19E-06	0.240701288	0	0.011764706	378.4973	986.9844	647.2733	0.486	4.0398	1522	1.152488052	0.002662247	74.37777326	0.171812656
109.6797938	×ÔÉí³µÁ¾	Road 1	362.1423082	80.40671082	2.19E-06	0.24001728	0	0.011764706	378.9893	986.9922	647.2482	0.4871	4.0387	1523	1.279178243	0.002954902	74.39909466	0.171861909
109.6964072	×ÔÉí³µÁ¾	Road 1	362.5133975	80.41215591	2.19E-06	0.241285786	0	0.011764706	379.3023	986.9971	647.2322	0.4879	4.0379	1524	1.153182205	0.002663851	74.41825296	0.171906164
109.7130756	×ÔÉí³µÁ¾	Road 1	362.8857403	80.41764221	2.19E-06	0.23998186	0	0.011764706	379.6154	987.002	647.2162	0.4887	4.0371	1525	1.15420669	0.002666217	74.43749175	0.171950606
109.7298551	×ÔÉí³µÁ¾	Road 1	363.2606043	80.42628021	2.19E-06	0.240566656	0	0.011764706	380.1075	987.0098	647.191	0.4899	4.0359	1526	1.283323085	0.002964476	74.45902524	0.172000348
109.7463772	×ÔÉí³µÁ¾	Road 1	363.6297515	80.43320847	2.19E-06	0.239917129	0	0.011764706	380.5101	987.0156	647.1704	0.4913	4.0345	1527	1.217056915	0.002811401	74.47913364	0.172046799
109.7644609	×ÔÉí³µÁ¾	Road 1	364.0338224	80.44021225	2.19E-06	0.240296736	0	0.011764706	380.9128	987.0225	647.1499	0.4918	4.034	1528	1.194869763	0.002760149	74.50074128	0.172096712
109.8131491	×ÔÉí³µÁ¾	Road 1	365.1219789	80.4581955	2.19E-06	0.23958227	0	0.011764706	381.942	987.0381	647.0973	0.4949	4.0309	1529	1.18257664	0.002731752	74.55831879	0.172229716
109.8298963	×ÔÉí³µÁ¾	Road 1	365.496307	80.46597519	2.19E-06	0.240810841	0	0.011764706	382.3895	987.0459	647.0745	0.4952	4.0306	1530	1.248862552	0.002884872	74.57923377	0.17227803
109.8464867	×ÔÉí³µÁ¾	Road 1	365.8671515	80.47097397	2.19E-06	0.217044398	0	0.019607844	382.7028	987.0508	647.0585	0.496	4.0298	1531	1.135416067	0.002622811	74.5980707	0.172321543
109.8631246	×ÔÉí³µÁ¾	Road 1	366.2390732	80.47357635	2.19E-06	0.155781582	0	0.019607844	383.0161	987.0557	647.0425	0.4969	4.029	1532	1.034680922	0.002390113	74.6152857	0.17236131
109.8797634	×ÔÉí³µÁ¾	Road 1	366.6110082	80.47291718	2.19E-06	0.094938397	0	0.027450981	383.4861	987.0625	647.0185	0.4986	4.0273	1533	0.925900467	0.00213883	74.6306915	0.172396897
109.8964134	×ÔÉí³µÁ¾	Road 1	366.9831871	80.47072678	2.19E-06	0.090413481	0	0.027450981	383.7994	987.0684	647.0024	0.4984	4.0275	1534	0.92588343	0.002138791	74.64610753	0.172432508
109.9130514	×ÔÉí³µÁ¾	Road 1	367.3550885	80.46918869	2.19E-06	0.11673253	0	0.027450981	384.1127	987.0732	646.9865	0.4992	4.0266	1535	0.925871468	0.002138763	74.66151216	0.172468093
109.9297242	×ÔÉí³µÁ¾	Road 1	367.7277676	80.46903076	2.19E-06	0.132219031	0	0.027450981	384.5827	987.0801	646.9624	0.5009	4.0249	1536	0.925870239	0.00213876	74.67694902	0.172503752
109.9464733	×ÔÉí³µÁ¾	Road 1	368.1021471	80.46822052	2.19E-06	0.091437049	0	0.035294119	384.896	987.085	646.9464	0.5017	4.0241	1537	0.925863937	0.002138746	74.69245636	0.172539574
109.9630827	×ÔÉí³µÁ¾	Road 1	368.4733863	80.46418991	2.19E-06	0.018108722	0	0.035294119	385.2093	987.0898	646.9304	0.5025	4.0233	1538	0.925832588	0.002138673	74.70783388	0.172575096
109.979769	×ÔÉí³µÁ¾	Road 1	368.8463032	80.4549408	2.19E-06	0.02784715	0	0.035294119	385.6792	987.0977	646.9064	0.5032	4.0226	1539	0.925760651	0.002138507	74.72328146	0.17261078
109.9964261	×ÔÉí³µÁ¾	Road 1	369.2185478	80.45126724	2.19E-06	0.073942892	0	0.035294119	385.97	987.1025	646.8916	0.5036	4.0222	1540	0.925732079	0.002138441	74.73870142	0.1726464
110.0130366	×ÔÉí³µÁ¾	Road 1	369.5897343	80.44744263	2.19E-06	0.073348485	0	0.035294119	386.4398	987.1094	646.8676	0.5053	4.0205	1541	0.925702332	0.002138372	74.75407779	0.17268192
110.0297471	×ÔÉí³µÁ¾	Road 1	369.9631395	80.44365234	2.19E-06	0.039758168	0	0.035294119	386.7531	987.1143	646.8516	0.5061	4.0197	1542	0.925672852	0.002138304	74.76954631	0.172717652
110.0465244	×ÔÉí³µÁ¾	Road 1	370.3380028	80.43631897	2.19E-06	0.032736499	0	0.035294119	387.0887	987.1201	646.8345	0.5064	4.0195	1543	0.925618378	0.002138178	74.78507566	0.172753525
110.06311	×ÔÉí³µÁ¾	Road 1	370.7085681	80.43350372	2.19E-06	0.054885298	0	0.035294119	387.4242	987.125	646.8173	0.5076	4.0182	1544	0.925593918	0.002138122	74.80042716	0.172788987
110.0798455	×ÔÉí³µÁ¾	Road 1	371.0824605	80.42865601	2.19E-06	0.101330608	0	0.027450981	387.9387	987.1338	646.791	0.5082	4.0177	1545	0.925556213	0.002138035	74.81591679	0.172824768
110.0964724	×ÔÉí³µÁ¾	Road 1	371.4539278	80.42840881	2.19E-06	0.147695869	0	0.027450981	388.2965	987.1387	646.7727	0.5098	4.0161	1546	0.925554291	0.00213803	74.83130597	0.172860317
110.1131049	×ÔÉí³µÁ¾	Road 1	371.8255217	80.42922592	2.17E-06	0.135175616	0	0.027450981	388.632	987.1445	646.7556	0.51	4.0158	1547	0.959707217	0.002216924	74.84726829	0.17289719
110.1297726	×ÔÉí³µÁ¾	Road 1	372.1979006	80.4289856	2.13E-06	0.148005426	0	0.019607844	389.1018	987.1514	646.7316	0.5117	4.0141	1548	0.925558777	0.002138041	74.8626952	0.172932826
110.1464311	×ÔÉí³µÁ¾	Road 1	372.5700875	80.43172531	2.04E-06	0.22674264	0	0.011764706	389.4149	987.1563	646.7156	0.5125	4.0134	1549	1.039894847	0.002402157	74.8800183	0.172972842
110.16305	×ÔÉí³µÁ¾	Road 1	372.941422	80.4386879	1.98E-06	0.297349423	0	0.011764706	389.7281	987.1611	646.6995	0.5133	4.0126	1550	1.216858045	0.002810942	74.90024117	0.173019557
110.1797463	×ÔÉí³µÁ¾	Road 1	373.3145383	80.45023727	1.88E-06	0.249830469	0	0.011764706	390.1979	987.1689	646.6756	0.514	4.0119	1551	1.406616999	0.003249285	74.92372642	0.173073808
110.1964679	×ÔÉí³µÁ¾	Road 1	373.6882342	80.45363617	1.79E-06	0.220020786	0	0.011764706	390.3545	987.1719	646.6676	0.514	4.012	1552	1.067070568	0.002464933	74.94156951	0.173115026
110.2130897	×ÔÉí³µÁ¾	Road 1	374.0597241	80.45812683	1.64E-06	0.212469399	0	0.011764706	390.8244	987.1787	646.6436	0.5157	4.0103	1553	1.113631303	0.002572488	74.96008012	0.173157785
110.2297574	×ÔÉí³µÁ¾	Road 1	374.4322769	80.46653824	1.48E-06	0.265532017	0	0.011764706	391.2943	987.1865	646.6196	0.5164	4.0096	1554	1.276763722	0.002949324	74.98136081	0.173206943
110.2465328	×ÔÉí³µÁ¾	Road 1	374.8072701	80.47333603	1.29E-06	0.258420259	0	0.011764706	391.6076	987.1914	646.6036	0.5172	4.0088	1555	1.207703397	0.002789795	75.00162056	0.173253744
110.2630942	×ÔÉí³µÁ¾	Road 1	375.177515	80.48133545	1.12E-06	0.222647667	0	0.011764706	392.0776	987.1992	646.5796	0.5179	4.0081	1556	1.261895927	0.00291498	75.02251929	0.17330202
110.2796889	×ÔÉí³µÁ¾	Road 1	375.5485205	80.48457642	9.62E-07	0.222073168	0	0.011764706	392.2343	987.2012	646.5716	0.5188	4.0072	1557	1.061829166	0.002452825	75.04014006	0.173342724
110.2963922	×ÔÉí³µÁ¾	Road 1	375.9219844	80.49161453	7.95E-07	0.24617976	0	0.011764706	392.7268	987.209	646.5464	0.5199	4.0061	1558	1.219135649	0.002816203	75.06050357	0.173389763
110.3130602	×ÔÉí³µÁ¾	Road 1	376.2947023	80.50043793	6.55E-07	0.247523144	0	0.011764706	393.1969	987.2168	646.5225	0.5207	4.0054	1559	1.294360999	0.002989974	75.08207803	0.1734396
110.3297066	×ÔÉí³µÁ¾	Road 1	376.666962	80.50592422	5.44E-07	0.235517278	0	0.011764706	393.5103	987.2217	646.5064	0.5215	4.0046	1560	1.155446982	0.002669083	75.10131208	0.173484031
110.3464799	×ÔÉí³µÁ¾	Road 1	377.042082	80.51108093	4.31E-07	0.232156157	0	0.011764706	393.8238	987.2266	646.4904	0.5223	4.0038	1561	1.140097035	0.002633624	75.1204352	0.173528205
110.3634276	×ÔÉí³µÁ¾	Road 1	377.4211308	80.51675262	3.67E-07	0.239362746	0	0.011764706	394.1596	987.2314	646.4733	0.5235	4.0026	1562	1.15909623	0.002677512	75.14007925	0.173573583
110.3796664	×ÔÉí³µÁ¾	Road 1	377.7843524	80.5230217	2.96E-07	0.244931534	0	0.011764706	394.5179	987.2373	646.455	0.5241	4.002	1563	1.194926965	0.002760281	75.15948343	0.173618407
110.3965536	×ÔÉí³µÁ¾	Road 1	378.1621205	80.53211975	2.43E-07	0.23826386	0	0.011764706	395.033	987.2451	646.4286	0.5256	4.0005	1564	1.301288485	0.003005976	75.1814586	0.173669169
110.4130732	×ÔÉí³µÁ¾	Road 1	378.5316889	80.53749619	1.90E-07	0.236461416	0	0.011764706	395.3466	987.25	646.4126	0.5264	3.9997	1565	1.152915071	0.002663234	75.20050428	0.173713165
110.4297009	×ÔÉí³µÁ¾	Road 1	378.9037129	80.54539948	1.43E-07	0.238758758	0	0.011764706	395.817	987.2578	646.3886	0.5271	3.999	1566	1.257296329	0.002904355	75.22141025	0.173761458
110.4463752	×ÔÉí³µÁ¾	Road 1	379.2768043	80.55098877	9.88E-08	0.241545409	0	0.011764706	396.1306	987.2627	646.3726	0.5279	3.9982	1567	1.159842169	0.002679235	75.24074978	0.173806132
110.4630759	×ÔÉí³µÁ¾	Road 1	379.6505107	80.55626221	6.46E-08	0.240610972	0	0.011764706	396.4442	987.2676	646.3565	0.5287	3.9974	1568	1.146364128	0.002648101	75.25989482	0.173850357
110.4797546	×ÔÉí³µÁ¾	Road 1	380.0237624	80.56433029	3.94E-08	0.238534063	0	0.011764706	396.9147	987.2754	646.3325	0.5295	3.9967	1569	1.263388962	0.002918429	75.28096647	0.173899033
110.4964787	×ÔÉí³µÁ¾	Road 1	380.3980565	80.56976166	1.84E-08	0.239218265	0	0.011764706	397.2284	987.2803	646.3165	0.5303	3.9959	1570	1.152772225	0.002662904	75.30024558	0.173943567
110.5130239	×ÔÉí³µÁ¾	Road 1	380.7683721	80.57517929	6.94E-09	0.240441516	0	0.011764706	397.5421	987.2852	646.3005	0.5311	3.9951	1571	1.15469649	0.002667349	75.31935031	0.173987699
110.5297418	×ÔÉí³µÁ¾	Road 1	381.1425897	80.58332291	1.62E-09	0.239467606	0	0.011764706	398.0127	987.293	646.2764	0.5318	3.9944	1572	1.265971783	0.002924395	75.34051469	0.174036589
110.5463556	×ÔÉí³µÁ¾	Road 1	381.5145014	80.58860321	4.32E-11	0.238843024	0	0.011764706	398.3264	987.2979	646.2604	0.5326	3.9936	1573	1.148141622	0.002652207	75.35958968	0.174080652
110.5630203	×ÔÉí³µÁ¾	Road 1	381.8875915	80.59678116	-2.11E-10	0.239063174	0	0.011764706	398.7971	987.3047	646.2363	0.5343	3.9915	1574	1.268649979	0.002930581	75.3807314	0.17412949
110.5797115	×ÔÉí³µÁ¾	Road 1	382.2612975	80.60216446	-3.66E-09	0.239043206	0	0.011764706	399.1109	987.3096	646.2203	0.5351	3.9906	1575	1.151556548	0.002660096	75.39995219	0.17417389
110.5964092	×ÔÉí³µÁ¾	Road 1	382.6351781	80.60795288	-1.78E-08	0.239432648	0	0.011764706	399.4472	987.3154	646.2031	0.5353	3.9903	1576	1.168428974	0.002699071	75.4194623	0.174218958
110.6130113	×ÔÉí³µÁ¾	Road 1	383.0069409	80.61325378	-5.22E-08	0.239237785	0	0.011764706	399.761	987.3203	646.1871	0.5361	3.9894	1577	1.149421823	0.002655164	75.43854508	0.174263039
110.6297013	×ÔÉí³µÁ¾	Road 1	383.3807129	80.62172012	-1.05E-07	0.239617988	0	0.011764706	400.2543	987.3281	646.1619	0.5373	3.9881	1578	1.280469341	0.002957884	75.45991615	0.174312406
110.6464042	×ÔÉí³µÁ¾	Road 1	383.7547973	80.62711029	-1.79E-07	0.239158198	0	0.011764706	400.5682	987.333	646.1459	0.5381	3.9872	1579	1.151948711	0.002661002	75.479157	0.174356853
110.6630136	×ÔÉí³µÁ¾	Road 1	384.1268254	80.63517838	-3.05E-07	0.2391579	0	0.011764706	401.0391	987.3398	646.1218	0.5398	3.9856	1580	1.26564214	0.002923633	75.50017854	0.174405412
110.6796611	×ÔÉí³µÁ¾	Road 1	384.4997323	80.64056168	-4.52E-07	0.239482582	0	0.011764706	401.3531	987.3457	646.1058	0.5396	3.9857	1581	1.152551131	0.002662393	75.51936565	0.174449735
110.6964823	×ÔÉí³µÁ¾	Road 1	384.8765587	80.64643936	-6.83E-07	0.23887299	0	0.011764706	401.6895	987.3506	646.0886	0.5408	3.9845	1582	1.170767581	0.002704473	75.53905944	0.174495227
110.713084	×ÔÉí³µÁ¾	Road 1	385.2485035	80.65450058	-1.04E-06	0.239248067	0	0.011764706	402.1605	987.3584	646.0645	0.5416	3.9838	1583	1.26574226	0.002923865	75.56007291	0.174543768
110.7297132	×ÔÉí³µÁ¾	Road 1	385.6210891	80.65987015	-1.53E-06	0.238823071	0	0.011764706	402.4745	987.3633	646.0485	0.5425	3.983	1584	1.152428075	0.002662109	75.57923685	0.174588037
110.7464648	×ÔÉí³µÁ¾	Road 1	385.9964441	80.66554184	-2.24E-06	0.239452317	0	0.011764706	402.811	987.3682	646.0313	0.5436	3.9818	1585	1.163414812	0.002687488	75.59872593	0.174633057
110.7630277	×ÔÉí³µÁ¾	Road 1	386.3675958	80.67130966	-3.00E-06	0.238528639	0	0.011764706	403.1476	987.374	646.0141	0.5438	3.9816	1586	1.170212769	0.002703191	75.61810797	0.174677829
110.7797192	×ÔÉí³µÁ¾	Road 1	386.7416684	80.67946014	-3.87E-06	0.239158198	0	0.011764706	403.6187	987.3809	645.9901	0.5454	3.9799	1587	1.267948009	0.00292896	75.63927193	0.174726718
110.7964723	×ÔÉí³µÁ¾	Road 1	387.1171457	80.68475418	-4.98E-06	0.239378035	0	0.011764706	403.9328	987.3857	645.974	0.5461	3.9791	1588	1.147882582	0.002651609	75.6585025	0.174771141
110.8130215	×ÔÉí³µÁ¾	Road 1	387.4880921	80.69278107	-6.44E-06	0.239342481	0	0.011764706	404.4041	987.3936	645.9499	0.5468	3.9784	1589	1.265826537	0.002924059	75.67945101	0.174819532
110.8297226	×ÔÉí³µÁ¾	Road 1	387.8624651	80.6981781	-8.42E-06	0.239717245	0	0.011764706	404.7183	987.3984	645.9338	0.5476	3.9776	1590	1.153011061	0.002663456	75.69870749	0.174864014
110.8465086	×ÔÉí³µÁ¾	Road 1	388.2387694	80.70352707	-1.03E-05	0.238453597	0	0.011764706	405.0325	987.4033	645.9178	0.5484	3.9768	1591	1.149928914	0.002656336	75.71801028	0.174908604
110.8630499	×ÔÉí³µÁ¾	Road 1	388.6096096	80.70899963	-1.30E-05	0.239048645	0	0.011764706	405.3467	987.4082	645.9018	0.5492	3.976	1592	1.158487783	0.002676107	75.73717307	0.17495287
110.8796768	×ÔÉí³µÁ¾	Road 1	388.9824133	80.71777496	-1.61E-05	0.238119215	0	0.011764706	405.863	987.416	645.8754	0.5507	3.9744	1593	1.295941074	0.002993624	75.75872067	0.175002645
110.8965304	×ÔÉí³µÁ¾	Road 1	389.3603214	80.7231514	-1.94E-05	0.238583416	0	0.011764706	406.1773	987.4219	645.8593	0.5505	3.9746	1594	1.150382809	0.002657384	75.77810866	0.175047431
110.9130606	×ÔÉí³µÁ¾	Road 1	389.7310165	80.73110275	-2.32E-05	0.238303944	0	0.011764706	406.6487	987.4287	645.8353	0.5522	3.9729	1595	1.26348785	0.002918657	75.79899439	0.175095677
110.9296652	×ÔÉí³µÁ¾	Road 1	390.1034055	80.73654099	-2.69E-05	0.238513812	0	0.011764706	406.9631	987.4336	645.8192	0.553	3.9721	1596	1.156456645	0.002671415	75.81819692	0.175140035
110.9463629	×ÔÉí³µÁ¾	Road 1	390.4779055	80.74151917	-3.05E-05	0.238519251	0	0.011764706	407.255	987.4385	645.8043	0.5534	3.9717	1597	1.136011774	0.002624187	75.83716574	0.175183853
110.9630453	×ÔÉí³µÁ¾	Road 1	390.852097	80.74943619	-3.40E-05	0.238283679	0	0.011764706	407.7265	987.4463	645.7802	0.5542	3.9709	1598	1.259209918	0.002908775	75.85817231	0.175232378
110.9796895	×ÔÉí³µÁ¾	Road 1	391.2254582	80.75480576	-3.68E-05	0.239112809	0	0.011764706	408.041	987.4512	645.7641	0.555	3.9701	1599	1.153227912	0.002663956	75.87736688	0.175276717
110.9963462	×ÔÉí³µÁ¾	Road 1	391.5991238	80.76016846	-3.90E-05	0.238234043	0	0.011764706	408.3554	987.4561	645.748	0.5558	3.9693	1600	1.15282842	0.002663034	75.89656917	0.175321075
111.0131209	×ÔÉí³µÁ¾	Road 1	391.9754643	80.76597748	-4.03E-05	0.238823369	0	0.011764706	408.6923	987.4609	645.7308	0.557	3.968	1601	1.169878241	0.002702419	75.91619354	0.175366407
111.029727	×ÔÉí³µÁ¾	Road 1	392.3480638	80.7750618	-4.07E-05	0.238174438	0	0.011764706	409.2314	987.4697	645.7034	0.558	3.967	1602	1.310098773	0.003026328	75.93794916	0.175416663
111.0463778	×ÔÉí³µÁ¾	Road 1	392.7216914	80.78039017	-4.07E-05	0.239003107	0	0.011764706	409.5459	987.4746	645.6873	0.5588	3.9662	1603	1.151681807	0.002660385	75.9571256	0.17546096
111.063004	×ÔÉí³µÁ¾	Road 1	393.0947927	80.7857666	-4.07E-05	0.238988131	0	0.011764706	409.8604	987.4795	645.6711	0.5596	3.9654	1604	1.154086651	0.00266594	75.97631374	0.175505285
111.0797058	×ÔÉí³µÁ¾	Road 1	393.4696282	80.7943428	-4.07E-05	0.238049462	0	0.011764706	410.3547	987.4873	645.6459	0.5607	3.9642	1605	1.286912357	0.002972768	75.99780745	0.175554935
111.0964079	×ÔÉí³µÁ¾	Road 1	393.8444968	80.79968491	-4.03E-05	0.238059446	0	0.011764706	410.6693	987.4922	645.6299	0.5615	3.9634	1606	1.151772796	0.002660595	76.01704451	0.175599373
111.1130954	×ÔÉí³µÁ¾	Road 1	394.2190623	80.8052948	-3.95E-05	0.238223776	0	0.011764706	411.0064	987.498	645.6126	0.5618	3.9631	1607	1.163233647	0.00268707	76.03645593	0.175644213
111.1296971	×ÔÉí³µÁ¾	Road 1	394.5917272	80.8106369	-3.88E-05	0.238213792	0	0.011764706	411.321	987.5029	645.5966	0.5626	3.9623	1608	1.153239533	0.002663983	76.05560166	0.17568844
111.1463838	×ÔÉí³µÁ¾	Road 1	394.9663306	80.81702271	-3.79E-05	0.238463432	0	0.011764706	411.7031	987.5088	645.577	0.5637	3.9612	1609	1.195842316	0.002762396	76.07555637	0.175734535
111.1630086	×ÔÉí³µÁ¾	Road 1	395.3395755	80.82398529	-3.71E-05	0.237764567	0	0.011764706	412.1077	987.5146	645.5564	0.5652	3.9597	1610	1.22114658	0.002820849	76.09585767	0.175781431
111.1796345	×ÔÉí³µÁ¾	Road 1	395.7128715	80.82969818	-3.65E-05	0.238578856	0	0.011764706	412.4448	987.5205	645.5392	0.5654	3.9594	1611	1.168691162	0.002699677	76.1152882	0.175826316
111.1964649	×ÔÉí³µÁ¾	Road 1	396.0907897	80.83607712	-3.60E-05	0.237904221	0	0.011764706	412.827	987.5264	645.5196	0.5665	3.9584	1612	1.193486227	0.002756953	76.13537508	0.175872716
111.213034	×ÔÉí³µÁ¾	Road 1	396.4628674	80.84216766	-3.57E-05	0.238369167	0	0.011764706	413.1867	987.5322	645.5013	0.5672	3.9577	1613	1.185571016	0.002738669	76.15501889	0.175918094
111.2296866	×ÔÉí³µÁ¾	Road 1	396.8368645	80.85139618	-3.52E-05	0.238099381	0	0.011764706	413.7263	987.541	645.4737	0.5682	3.9567	1614	1.316034399	0.003040039	76.17693434	0.175968718
111.2465548	×ÔÉí³µÁ¾	Road 1	397.2157165	80.85443802	-3.48E-05	0.2380891	0	0.011764706	413.9062	987.543	645.4645	0.5695	3.9554	1615	1.054869658	0.002436749	76.19472807	0.176009822
111.2630224	×ÔÉí³µÁ¾	Road 1	397.5856046	80.86196365	-3.41E-05	0.237809509	0	0.011764706	414.356	987.5508	645.4415	0.5699	3.955	1616	1.248265145	0.002883492	76.21528392	0.176057306
111.2796691	×ÔÉí³µÁ¾	Road 1	397.9595558	80.86994934	-3.37E-05	0.238269001	0	0.011764706	414.8282	987.5576	645.4174	0.5716	3.9533	1617	1.264232315	0.002920377	76.23632932	0.176105921
111.2963889	×ÔÉí³µÁ¾	Road 1	398.3351705	80.87529831	-3.31E-05	0.23821409	0	0.011764706	415.1431	987.5625	645.4013	0.5724	3.9524	1618	1.15262168	0.002662556	76.25560084	0.176150438
111.3129847	×ÔÉí³µÁ¾	Road 1	398.7080284	80.881073	-3.26E-05	0.237984121	0	0.011764706	415.4805	987.5684	645.384	0.5727	3.9521	1619	1.17228087	0.002707969	76.27505582	0.176195379
111.3296934	×ÔÉí³µÁ¾	Road 1	399.0834613	80.88936768	-3.21E-05	0.237739608	0	0.011764706	415.9754	987.5762	645.3588	0.5739	3.951	1620	1.276146575	0.002947899	76.2963786	0.176244635
111.3463809	×ÔÉí³µÁ¾	Road 1	399.4584411	80.89466171	-3.15E-05	0.238583416	0	0.011764706	416.2903	987.5811	645.3427	0.5747	3.9501	1621	1.150957021	0.002658711	76.31558516	0.176289002
111.3630379	×ÔÉí³µÁ¾	Road 1	399.8327742	80.902668	-3.06E-05	0.238139331	0	0.011764706	416.7628	987.5889	645.3186	0.5755	3.9494	1622	1.265280331	0.002922798	76.33666099	0.176337687
111.3796613	×ÔÉí³µÁ¾	Road 1	400.2063622	80.90541458	-3.00E-05	0.237410218	0	0.011764706	416.9203	987.5908	645.3105	0.5764	3.9485	1623	1.044784556	0.002413452	76.35402878	0.176377806
111.3964561	×ÔÉí³µÁ¾	Road 1	400.5838494	80.91481476	-2.90E-05	0.238493681	0	0.011764706	417.4828	987.5996	645.2818	0.5778	3.947	1624	1.320696363	0.003050809	76.37620971	0.176429044
111.4129746	×ÔÉí³µÁ¾	Road 1	400.9551505	80.92049332	-2.80E-05	0.238044038	0	0.011764706	417.8204	987.6055	645.2645	0.5781	3.9468	1625	1.169775905	0.002702182	76.39553263	0.17647368
111.4296984	×ÔÉí³µÁ¾	Road 1	401.3310922	80.92619247	-2.71E-05	0.238049164	0	0.011764706	418.158	987.6104	645.2473	0.5794	3.9456	1626	1.167747671	0.002697497	76.41506176	0.176518793
111.4464753	×ÔÉí³µÁ¾	Road 1	401.7082539	80.93160324	-2.59E-05	0.238603696	0	0.011764706	418.4731	987.6152	645.2312	0.5802	3.9448	1627	1.155028767	0.002668116	76.43443957	0.176563555
111.4630224	×ÔÉí³µÁ¾	Road 1	402.0802766	80.93766632	-2.50E-05	0.237769559	0	0.011764706	418.8332	987.6211	645.2128	0.5809	3.9441	1628	1.185797954	0.002739193	76.45406106	0.176608881
111.479682	×ÔÉí³µÁ¾	Road 1	402.454857	80.9436264	-2.41E-05	0.23839882	0	0.011764706	419.1934	987.627	645.1944	0.5816	3.9435	1629	1.179807545	0.002725355	76.4737162	0.176654284
111.4963335	×ÔÉí³µÁ¾	Road 1	402.8292999	80.95311584	-2.38E-05	0.237494662	0	0.011764706	419.7562	987.6357	645.1656	0.583	3.9421	1630	1.328299505	0.003068372	76.49583444	0.176705378
111.5130316	×ÔÉí³µÁ¾	Road 1	403.2048148	80.95852661	-2.34E-05	0.238349184	0	0.011764706	420.0714	987.6406	645.1496	0.5839	3.9413	1631	1.156378137	0.002671233	76.51514376	0.176749982
111.5296428	×ÔÉí³µÁ¾	Road 1	403.5784021	80.96419144	-2.33E-05	0.237215206	0	0.011764706	420.4091	987.6465	645.1323	0.5841	3.941	1632	1.168324368	0.002698829	76.53455105	0.176794813
111.5463783	×ÔÉí³µÁ¾	Road 1	403.9548065	80.96900482	-2.33E-05	0.238293678	0	0.011764706	420.7018	987.6504	645.1173	0.5855	3.9397	1633	1.131006728	0.002612626	76.553479	0.176838536
111.5629892	×ÔÉí³µÁ¾	Road 1	404.328448	80.97771835	-2.33E-05	0.237399936	0	0.011764706	421.2198	987.6592	645.0909	0.5862	3.9391	1634	1.29690382	0.002995848	76.57502169	0.1768883
111.5796484	×ÔÉí³µÁ¾	Road 1	404.7032024	80.98302612	-2.33E-05	0.238249168	0	0.011764706	421.5351	987.6641	645.0748	0.587	3.9383	1635	1.152839596	0.002663059	76.59422713	0.176932665
111.5963993	×ÔÉí³µÁ¾	Road 1	405.0800557	80.99105301	-2.33E-05	0.237125337	0	0.011764706	422.0081	987.6709	645.0507	0.5888	3.9366	1636	1.265311011	0.002922868	76.6154222	0.176981625
111.6129871	×ÔÉí³µÁ¾	Road 1	405.4532636	80.99634705	-2.33E-05	0.237954006	0	0.011764706	422.3234	987.6758	645.0345	0.5896	3.9358	1637	1.153361386	0.002664265	76.63455389	0.177025819
111.6297017	×ÔÉí³µÁ¾	Road 1	405.8293508	81.00191574	-2.33E-05	0.236870825	0	0.011764706	422.6613	987.6816	645.0173	0.5899	3.9355	1638	1.163226953	0.002687054	76.65399676	0.177070733
111.6463719	×ÔÉí³µÁ¾	Road 1	406.2044646	81.00720978	-2.33E-05	0.238153875	0	0.011764706	422.9767	987.6865	645.0012	0.5907	3.9347	1639	1.152370477	0.002661976	76.67320705	0.177115108
111.6630022	×ÔÉí³µÁ¾	Road 1	406.5787147	81.01524353	-2.33E-05	0.237275124	0	0.011764706	423.3146	987.6914	644.9839	0.592	3.9335	1640	1.268318235	0.002929815	76.69429954	0.177163832
111.6797087	×ÔÉí³µÁ¾	Road 1	406.9547087	81.02091522	-2.33E-05	0.238259166	0	0.011764706	423.7878	987.6992	644.9597	0.5928	3.9327	1641	1.167858387	0.002697753	76.71381041	0.177208902
111.6963705	×ÔÉí³µÁ¾	Road 1	407.3297207	81.02619553	-2.33E-05	0.237435043	0	0.011764706	424.1032	987.7041	644.9436	0.5936	3.9319	1642	1.152105667	0.002661364	76.73300657	0.177253245
111.7129664	×ÔÉí³µÁ¾	Road 1	407.7032854	81.03440094	-2.33E-05	0.238064006	0	0.011764706	424.599	987.7119	644.9183	0.5948	3.9308	1643	1.276495396	0.002948704	76.75419107	0.177302181
111.7296714	×ÔÉí³µÁ¾	Road 1	408.0793335	81.03969498	-2.33E-05	0.237619624	0	0.011764706	424.9145	987.7168	644.9022	0.5957	3.93	1644	1.152248679	0.002661694	76.77343946	0.177346645
111.746323	×ÔÉí³µÁ¾	Road 1	408.4542141	81.04772186	-2.33E-05	0.237305075	0	0.011764706	425.3878	987.7246	644.878	0.5965	3.9292	1645	1.267988595	0.002929054	76.79455343	0.177395418
111.7630482	×ÔÉí³µÁ¾	Road 1	408.8307774	81.05290604	-2.33E-05	0.237574548	0	0.011764706	425.7034	987.7295	644.8618	0.5973	3.9284	1646	1.147519235	0.002650769	76.81374595	0.177439753
111.7796965	×ÔÉí³µÁ¾	Road 1	409.205632	81.05817947	-2.33E-05	0.237959296	0	0.011764706	426.019	987.7344	644.8457	0.5982	3.9276	1647	1.152333973	0.002661891	76.83293029	0.177484069
111.7963278	×ÔÉí³µÁ¾	Road 1	409.5801436	81.06611023	-2.33E-05	0.237524927	0	0.011764706	426.4924	987.7422	644.8215	0.5989	3.9268	1648	1.264568628	0.002921154	76.85396181	0.177532652
111.8129897	×ÔÉí³µÁ¾	Road 1	409.9553647	81.0713768	-2.33E-05	0.237909362	0	0.011764706	426.8081	987.7471	644.8054	0.5998	3.926	1649	1.152003395	0.002661128	76.87315628	0.177576991
111.8297002	×ÔÉí³µÁ¾	Road 1	410.3317208	81.07938995	-2.33E-05	0.237185255	0	0.011764706	427.2816	987.7539	644.7812	0.6016	3.9243	1650	1.266598248	0.002925842	76.89432184	0.177625883
111.8463935	×ÔÉí³µÁ¾	Road 1	410.7077134	81.08465652	-2.33E-05	0.237624779	0	0.011764706	427.5973	987.7598	644.7651	0.6014	3.9244	1651	1.151724704	0.002660484	76.91354797	0.177670296
111.8629747	×ÔÉí³µÁ¾	Road 1	411.081206	81.09038315	-2.33E-05	0.27252841	0	0	427.913	987.7646	644.749	0.6023	3.9236	1652	1.172722596	0.002708989	76.93299308	0.177715214
111.8796501	×ÔÉí³µÁ¾	Road 1	411.4568651	81.10000992	-2.33E-05	0.362472743	0	0	428.2287	987.7695	644.7328	0.6031	3.9227	1653	1.335366051	0.003084696	76.95526081	0.177766652
111.8963764	×ÔÉí³µÁ¾	Road 1	411.83374	81.1146492	-2.33E-05	0.385819972	0	0	428.5896	987.7754	644.7144	0.6038	3.922	1654	1.544360418	0.003567473	76.98109228	0.177826323
111.9129858	×ÔÉí³µÁ¾	Road 1	412.2080589	81.13168488	-2.33E-05	0.296000719	0	0	429.1085	987.7832	644.6879	0.6055	3.9204	1655	1.650081555	0.003811688	77.00849913	0.177889633
111.9296733	×ÔÉí³µÁ¾	Road 1	412.5841734	81.1394577	-2.33E-05	0.296005577	0	0	429.4244	987.7881	644.6718	0.6063	3.9195	1656	1.257682178	0.002905246	77.02948666	0.177938114
111.9474523	×ÔÉí³µÁ¾	Road 1	412.9849537	81.15209198	-2.33E-05	0.270321429	0	0.011764706	429.8983	987.7959	644.6476	0.6071	3.9187	1657	1.429516603	0.003302183	77.05490214	0.177996824
111.98149	×ÔÉí³µÁ¾	Road 1	413.7523158	81.16018753	-2.33E-05	0.195808947	0	0.011764706	430.5529	987.8057	644.6141	0.6092	3.9166	1658	1.09805547	0.002536508	77.09227739	0.178083161
111.9963014	×ÔÉí³µÁ¾	Road 1	414.0862503	81.16460266	-2.33E-05	0.243577406	0	0.011764706	430.8689	987.8105	644.598	0.6101	3.9158	1659	1.14036112	0.002634234	77.10916778	0.178122178
112.0129966	×ÔÉí³µÁ¾	Road 1	414.462687	81.17151031	-2.33E-05	0.270136088	0	0.011764706	431.2075	987.8164	644.5807	0.6104	3.9155	1660	1.221561081	0.002821806	77.12956194	0.178169288
112.0296287	×ÔÉí³µÁ¾	Road 1	414.8377377	81.17922134	-2.33E-05	0.239083022	0	0.011764706	431.5912	987.8223	644.5611	0.6115	3.9144	1661	1.25663251	0.002902821	77.1504624	0.178217568
112.0463272	×ÔÉí³µÁ¾	Road 1	415.2143099	81.18472137	-2.33E-05	0.214432061	0	0.011764706	431.9751	987.8281	644.5415	0.6126	3.9132	1662	1.16251608	0.002685412	77.16987464	0.17826241
112.0630026	×ÔÉí³µÁ¾	Road 1	415.5903851	81.18982315	-2.33E-05	0.231517211	0	0.011764706	432.3363	987.834	644.5231	0.6133	3.9125	1663	1.146134278	0.00264757	77.18898685	0.17830656
112.0796765	×ÔÉí³µÁ¾	Road 1	415.9664582	81.19653168	-2.33E-05	0.251243621	0	0.011764706	432.7202	987.8398	644.5034	0.6144	3.9114	1664	1.213836038	0.002803961	77.20922624	0.178353313
112.0963698	×ÔÉí³µÁ¾	Road 1	416.3430041	81.20398178	-2.33E-05	0.240561232	0	0.011764706	433.1266	987.8467	644.4827	0.615	3.9109	1665	1.244763389	0.002875403	77.23000549	0.178401313
112.1130496	×ÔÉí³µÁ¾	Road 1	416.7192809	81.21193314	-2.33E-05	0.227017254	0	0.011764706	433.6235	987.8545	644.4573	0.6162	3.9097	1666	1.266199626	0.002924921	77.25112541	0.1784501
112.1296736	×ÔÉí³µÁ¾	Road 1	417.0943232	81.21678085	-2.33E-05	0.235152811	0	0.011764706	433.9397	987.8594	644.4412	0.617	3.9088	1667	1.13635229	0.002624974	77.27001619	0.178493737
112.146312	×ÔÉí³µÁ¾	Road 1	417.4697124	81.22206116	-2.33E-05	0.242608473	0	0.011764706	434.256	987.8643	644.4249	0.6179	3.9079	1668	1.154479122	0.002666847	77.28922482	0.178538109
112.1629954	×ÔÉí³µÁ¾	Road 1	417.8461462	81.22798004	-2.33E-05	0.240611151	0	0.011764706	434.5948	987.8701	644.4077	0.6182	3.9076	1669	1.180806341	0.002727663	77.30892473	0.178583616
112.1796774	×ÔÉí³µÁ¾	Road 1	418.2225868	81.23657684	-2.33E-05	0.232251331	0	0.011764706	435.1144	987.8779	644.3812	0.6198	3.906	1670	1.293608936	0.002988237	77.33050468	0.178633466
112.1963282	×ÔÉí³µÁ¾	Road 1	418.598346	81.24126663	-2.33E-05	0.234118849	0	0.011764706	435.4081	987.8828	644.3661	0.6203	3.9056	1671	1.129616738	0.002609415	77.34931371	0.178676915
112.214156	×ÔÉí³µÁ¾	Road 1	419.0007117	81.25031662	-2.33E-05	0.239577293	0	0.011764706	435.9504	987.8906	644.3384	0.6223	3.9035	1672	1.288368108	0.00297613	77.37228251	0.178729973
112.2296705	×ÔÉí³µÁ¾	Road 1	419.3508878	81.25526047	-2.33E-05	0.237714663	0	0.011764706	436.2441	987.8955	644.3234	0.6228	3.9031	1673	1.155743527	0.002669768	77.39021328	0.178771393
112.2796853	×ÔÉí³µÁ¾	Road 1	420.4799976	81.27192535	-2.33E-05	0.237394959	0	0.011764706	437.2611	987.9121	644.2715	0.6247	3.9012	1674	1.166113578	0.002693722	77.44853617	0.178906119
112.2963544	×ÔÉí³µÁ¾	Road 1	420.8563398	81.27785797	-2.33E-05	0.237514496	0	0.011764706	437.6228	987.917	644.253	0.6263	3.8995	1675	1.182139543	0.002730742	77.46824142	0.178951638
112.3129803	×ÔÉí³µÁ¾	Road 1	421.2317358	81.28440857	-2.33E-05	0.235732138	0	0.011764706	438.007	987.9238	644.2333	0.6265	3.8994	1676	1.208969247	0.002792719	77.4883416	0.178998069
112.3296652	×ÔÉí³µÁ¾	Road 1	421.6084912	81.29023132	-2.36E-05	0.235536844	0	0.011764706	438.3688	987.9287	644.2148	0.6282	3.8977	1677	1.177412256	0.002719822	77.50798661	0.179043449
112.346312	×ÔÉí³µÁ¾	Road 1	421.9844151	81.29656219	-2.38E-05	0.236401036	0	0.011764706	438.7531	987.9355	644.1952	0.6283	3.8975	1678	1.199485109	0.002770811	77.52795418	0.179089574
112.3630203	×ÔÉí³µÁ¾	Road 1	422.3617588	81.3028244	-2.38E-05	0.237025201	0	0.011764706	439.1375	987.9414	644.1756	0.6294	3.8964	1679	1.195682344	0.002762026	77.54793207	0.179135723
112.3796132	×ÔÉí³µÁ¾	Road 1	422.7365261	81.30964279	-2.38E-05	0.236096501	0	0.011764706	439.4993	987.9473	644.1571	0.6302	3.8957	1680	1.221141366	0.002820837	77.56819435	0.179182529
112.3963143	×ÔÉí³µÁ¾	Road 1	423.113769	81.31678391	-2.38E-05	0.236086518	0	0.011764706	439.9742	987.9541	644.1329	0.6319	3.8939	1681	1.232930872	0.00284807	77.58878556	0.179230095
112.4130197	×ÔÉí³µÁ¾	Road 1	423.4911349	81.32191315	-2.38E-05	0.236711055	0	0.011764706	440.2907	987.959	644.1167	0.6328	3.893	1682	1.148279421	0.002652525	77.60796807	0.179274406
112.4296815	×ÔÉí³µÁ¾	Road 1	423.8675409	81.32739258	-2.38E-05	0.236031711	0	0.011764706	440.63	987.9648	644.0994	0.6331	3.8927	1683	1.163672247	0.002688083	77.62735695	0.179319195
112.4462949	×ÔÉí³µÁ¾	Road 1	424.242883	81.33370285	-2.38E-05	0.236910477	0	0.011764706	441.0145	987.9707	644.0797	0.6342	3.8916	1684	1.199561282	0.002770987	77.64728577	0.17936523
112.4629469	×ÔÉí³µÁ¾	Road 1	424.6191244	81.34015732	-2.38E-05	0.236241564	0	0.011764706	441.3991	987.9766	644.0601	0.6353	3.8905	1685	1.205102126	0.002783786	77.66735303	0.179411585
112.4796658	×ÔÉí³µÁ¾	Road 1	424.996909	81.3460762	-2.38E-05	0.236126468	0	0.011764706	441.761	987.9824	644.0416	0.636	3.8898	1686	1.181556562	0.002729396	77.68710746	0.179457218
112.4963471	×ÔÉí³µÁ¾	Road 1	425.3738814	81.35491333	-2.38E-05	0.235527158	0	0.011764706	442.304	987.9912	644.0139	0.637	3.8887	1687	1.305200242	0.003015013	77.70887982	0.179507512
112.513069	×ÔÉí³µÁ¾	Road 1	425.7517973	81.36009064	-2.38E-05	0.236760989	0	0.011764706	442.6208	987.9961	643.9977	0.6379	3.8878	1688	1.150485595	0.002657622	77.72811815	0.179551953
112.5296553	×ÔÉí³µÁ¾	Road 1	426.1266726	81.36541901	-2.38E-05	0.236556008	0	0.011764706	442.9376	988.001	643.9815	0.6387	3.8869	1689	1.15872511	0.002676655	77.74733711	0.179596349
112.5463464	×ÔÉí³µÁ¾	Road 1	426.5039431	81.37096024	-2.38E-05	0.235227585	0	0.011764706	443.277	988.0068	643.9642	0.639	3.8866	1690	1.166332055	0.002694227	77.76680452	0.179641318
112.5630218	×ÔÉí³µÁ¾	Road 1	426.8808866	81.37729111	-2.38E-05	0.236500904	0	0.011764706	443.6617	988.0127	643.9445	0.6401	3.8855	1691	1.199919768	0.002771815	77.78681363	0.179687539
112.5796803	×ÔÉí³µÁ¾	Road 1	427.2574862	81.38533859	-2.38E-05	0.236301482	0	0.011764706	444.1596	988.0205	643.9191	0.6413	3.8843	1692	1.27274886	0.00294005	77.80801573	0.179736516
112.596388	×ÔÉí³µÁ¾	Road 1	427.6352222	81.39094162	-2.38E-05	0.236690924	0	0.011764706	444.4991	988.0254	643.9017	0.6425	3.883	1693	1.168915735	0.002700195	77.82754554	0.17978163
112.612957	×ÔÉí³µÁ¾	Road 1	428.0098494	81.39609833	-2.38E-05	0.235367686	0	0.011764706	444.816	988.0303	643.8856	0.6434	3.8821	1694	1.151996617	0.002661112	77.84663305	0.179825722
112.6296298	×ÔÉí³µÁ¾	Road 1	428.3868478	81.40168076	-2.38E-05	0.237045303	0	0.011764706	445.1556	988.0361	643.8682	0.6436	3.8818	1695	1.168654015	0.002699591	77.86611779	0.179870732
112.64631	×ÔÉí³µÁ¾	Road 1	428.7640429	81.40833435	-2.38E-05	0.235322267	0	0.011764706	445.5631	988.042	643.8474	0.6451	3.8803	1696	1.21379739	0.002803872	77.8863641	0.179917501
112.6629989	×ÔÉí³µÁ¾	Road 1	429.1414628	81.41392365	-2.39E-05	0.236600757	0	0.011764706	445.9027	988.0479	643.83	0.6454	3.8799	1697	1.168846466	0.002700035	77.9058709	0.179962562
112.6796417	×ÔÉí³µÁ¾	Road 1	429.5178673	81.42021332	-2.39E-05	0.235277221	0	0.011764706	446.2877	988.0537	643.8104	0.6465	3.8788	1698	1.199176372	0.002770097	77.9258285	0.180008664
112.6963518	×ÔÉí³µÁ¾	Road 1	429.8958339	81.42811661	-2.39E-05	0.23546207	0	0.011764706	446.7632	988.0615	643.786	0.6473	3.878	1699	1.266136999	0.002924776	77.94698589	0.180057537
112.7129642	×ÔÉí³µÁ¾	Road 1	430.2716106	81.43328705	-2.39E-05	0.235826597	0	0.011764706	447.0802	988.0664	643.7698	0.6481	3.8771	1700	1.152397359	0.002662038	77.96612989	0.18010176
112.7296249	×ÔÉí³µÁ¾	Road 1	430.6485174	81.44097748	-2.39E-05	0.236071363	0	0.011764706	447.5558	988.0742	643.7455	0.6489	3.8763	1701	1.258287095	0.002906643	77.98709385	0.180150187
112.7463435	×ÔÉí³µÁ¾	Road 1	431.0267572	81.44588013	-2.39E-05	0.236186087	0	0.011764706	447.8503	988.0781	643.7305	0.6503	3.8749	1702	1.139863009	0.002633084	78.00615079	0.180194208
112.7629478	×ÔÉí³µÁ¾	Road 1	431.4024331	81.45098877	-2.39E-05	0.236021727	0	0.011764706	448.1674	988.083	643.7144	0.6512	3.8741	1703	1.150069436	0.00265666	78.02524684	0.18023832
112.7796704	×ÔÉí³µÁ¾	Road 1	431.7808277	81.45957184	-2.39E-05	0.236186385	0	0.011764706	448.6884	988.0918	643.6877	0.6518	3.8735	1704	1.294875768	0.002991163	78.04690061	0.18028834
112.7963003	×ÔÉí³µÁ¾	Road 1	432.1571474	81.46466675	-2.39E-05	0.235112578	0	0.011764706	449.0056	988.0967	643.6715	0.6527	3.8726	1705	1.149296654	0.002654875	78.06601332	0.180332491
112.8129959	×ÔÉí³µÁ¾	Road 1	432.5349776	81.47020798	-2.39E-05	0.236385807	0	0.011764706	449.3455	988.1016	643.6541	0.6539	3.8713	1706	1.167327145	0.002696526	78.08550247	0.180377511
112.8296746	×ÔÉí³µÁ¾	Road 1	432.9124625	81.4780632	-2.39E-05	0.235217452	0	0.011764706	449.8213	988.1094	643.6298	0.6547	3.8705	1707	1.265330041	0.002922912	78.10660649	0.180426261
112.8462858	×ÔÉí³µÁ¾	Road 1	433.2884462	81.48352203	-2.39E-05	0.236111298	0	0.011764706	450.1612	988.1152	643.6124	0.655	3.8703	1708	1.165162305	0.002691525	78.12596126	0.180470971
112.8629868	×ÔÉí³µÁ¾	Road 1	433.6664869	81.48877487	-2.39E-05	0.234777778	0	0.011764706	450.4785	988.1201	643.5963	0.6558	3.8696	1709	1.155288225	0.002668716	78.14525577	0.180515541
112.8796292	×ÔÉí³µÁ¾	Road 1	434.0432356	81.49645844	-2.39E-05	0.236301184	0	0.011764706	450.9544	988.127	643.572	0.6576	3.8678	1710	1.259007376	0.002908307	78.16620865	0.180563942
112.8963119	×ÔÉí³µÁ¾	Road 1	434.4209209	81.50160141	-2.39E-05	0.235856697	0	0.011764706	451.2717	988.1318	643.5557	0.6584	3.8669	1711	1.151028144	0.002658875	78.18541091	0.180608299
112.9130078	×ÔÉí³µÁ¾	Road 1	434.7989294	81.50689545	-2.39E-05	0.23596181	0	0.011764706	451.5891	988.1377	643.5396	0.6583	3.867	1712	1.157284523	0.002673327	78.20473282	0.180652933
112.9296223	×ÔÉí³µÁ¾	Road 1	435.1751342	81.51525879	-2.39E-05	0.235367104	0	0.011764706	452.1104	988.1455	643.5129	0.6599	3.8653	1713	1.288593597	0.002976651	78.22614219	0.180702388
112.9463648	×ÔÉí³µÁ¾	Road 1	435.5542598	81.52044296	-2.39E-05	0.235302597	0	0.011764706	452.4278	988.1504	643.4967	0.6607	3.8644	1714	1.15218332	0.002661543	78.24543256	0.180746949
112.9629467	×ÔÉí³µÁ¾	Road 1	435.9297739	81.52568207	-2.39E-05	0.235527173	0	0.011764706	452.7452	988.1553	643.4805	0.6616	3.8635	1715	1.156684108	0.00267194	78.26461258	0.180791255
112.9796008	×ÔÉí³µÁ¾	Road 1	436.306949	81.5312233	-2.39E-05	0.235876963	0	0.011764706	453.0853	988.1611	643.4631	0.6619	3.8632	1716	1.168558318	0.00269937	78.28407388	0.180836211
112.9962989	×ÔÉí³µÁ¾	Road 1	436.6851508	81.53782883	-2.39E-05	0.235482335	0	0.011764706	453.4935	988.167	643.4423	0.6635	3.8616	1717	1.212920484	0.002801846	78.30432735	0.180882996
113.0129581	×ÔÉí³µÁ¾	Road 1	437.0625115	81.54621277	-2.39E-05	0.235601872	0	0.011764706	454.015	988.1758	643.4156	0.6645	3.8609	1718	1.288888104	0.002977332	78.32579925	0.180932596
113.0296243	×ÔÉí³µÁ¾	Road 1	437.4400537	81.55136261	-2.39E-05	0.235666677	0	0.011764706	454.3326	988.1807	643.3994	0.6657	3.86	1719	1.152053119	0.002661243	78.34499961	0.180976949
113.0463191	×ÔÉí³µÁ¾	Road 1	437.8182676	81.55653305	-2.39E-05	0.235611856	0	0.011764706	454.6501	988.1855	643.3832	0.6665	3.8592	1720	1.152603769	0.002662515	78.3642421	0.181021399
113.0629542	×ÔÉí³µÁ¾	Road 1	438.1951534	81.56205368	-2.39E-05	0.235177219	0	0.011764706	454.9903	988.1904	643.3657	0.6678	3.8578	1721	1.168282701	0.002698733	78.38367654	0.181066293
113.0795958	×ÔÉí³µÁ¾	Road 1	438.5722159	81.56795197	-2.39E-05	0.235571921	0	0.011764706	455.3533	988.1963	643.3472	0.6685	3.8571	1722	1.184248366	0.002735614	78.40338439	0.181111818
113.0962888	×ÔÉí³µÁ¾	Road 1	438.9504702	81.57420044	-2.39E-05	0.235526875	0	0.011764706	455.7389	988.2021	643.3275	0.6696	3.856	1723	1.198335782	0.002768156	78.42338817	0.181158027
113.1129759	×ÔÉí³µÁ¾	Road 1	439.3286211	81.58056564	-2.39E-05	0.234833106	0	0.011764706	456.1246	988.209	643.3079	0.6697	3.8558	1724	1.203429987	0.002779923	78.44346993	0.181204416
113.1296201	×ÔÉí³µÁ¾	Road 1	439.7058273	81.5864296	-2.39E-05	0.235297337	0	0.011764706	456.4876	988.2148	643.2893	0.6704	3.855	1725	1.182955905	0.002732628	78.4631593	0.181249898
113.1463164	×ÔÉí³µÁ¾	Road 1	440.084242	81.59268494	-2.39E-05	0.234788358	0	0.011764706	456.8734	988.2207	643.2697	0.6714	3.8539	1726	1.198777159	0.002769175	78.4831744	0.181296133
113.1629753	×ÔÉí³µÁ¾	Road 1	440.4618361	81.59844589	-2.39E-05	0.235492021	0	0.011764706	457.2365	988.2266	643.251	0.6721	3.8532	1727	1.178507741	0.002722353	78.50280702	0.181341484
113.1796096	×ÔÉí³µÁ¾	Road 1	440.8389091	81.60617065	-2.39E-05	0.234563202	0	0.011764706	457.713	988.2334	643.2267	0.6739	3.8513	1728	1.262202795	0.002915688	78.5238029	0.181389985
113.1963843	×ÔÉí³µÁ¾	Road 1	441.2191886	81.61131363	-2.39E-05	0.235846713	0	0.011764706	458.0308	988.2383	643.2104	0.6747	3.8504	1729	1.150981256	0.002658767	78.54311028	0.181434585
113.2129724	×ÔÉí³µÁ¾	Road 1	441.5952638	81.61683426	-2.39E-05	0.23452355	0	0.011764706	458.3712	988.2441	643.1931	0.675	3.8501	1730	1.16952794	0.00270161	78.56251056	0.181479399
113.2295998	×ÔÉí³µÁ¾	Road 1	441.9722672	81.62526627	-2.39E-05	0.235352233	0	0.011764706	458.8933	988.252	643.1664	0.6766	3.8484	1731	1.292566542	0.002985829	78.58400252	0.181529046
113.2462865	×ÔÉí³µÁ¾	Road 1	442.3506408	81.63040237	-2.39E-05	0.234917879	0	0.011764706	459.2111	988.2568	643.1501	0.6774	3.8476	1732	1.152030259	0.00266119	78.60322614	0.181573452
113.2629219	×ÔÉí³µÁ¾	Road 1	442.7278766	81.63599854	-2.39E-05	0.23507306	0	0.011764706	459.5517	988.2627	643.1328	0.6777	3.8472	1733	1.17226774	0.002707938	78.62272731	0.1816185
113.2796519	×ÔÉí³µÁ¾	Road 1	443.107294	81.64395676	-2.39E-05	0.235272631	0	0.011764706	460.0511	988.2705	643.1073	0.6789	3.846	1734	1.270619606	0.002935131	78.64398476	0.181667605
113.2963522	×ÔÉí³µÁ¾	Road 1	443.4860618	81.649086	-2.36E-05	0.234857678	0	0.011764706	460.369	988.2754	643.091	0.6798	3.8451	1735	1.151758803	0.002660563	78.66321948	0.181712037
113.3129378	×ÔÉí³µÁ¾	Road 1	443.8622515	81.65431824	-2.33E-05	0.235387221	0	0.011764706	460.687	988.2803	643.0748	0.6807	3.8442	1736	1.157694451	0.002674274	78.68242049	0.181756391
113.3296073	×ÔÉí³µÁ¾	Road 1	444.2403825	81.66236572	-2.29E-05	0.234563202	0	0.011764706	461.1866	988.2881	643.0492	0.682	3.8429	1737	1.275835159	0.002947179	78.70368804	0.181805519
113.3462552	×ÔÉí³µÁ¾	Road 1	444.6180478	81.66776962	-2.23E-05	0.235577106	0	0.011764706	461.5273	988.2939	643.0319	0.6823	3.8426	1738	1.16427932	0.002689485	78.72307082	0.181850294
113.3629346	×ÔÉí³µÁ¾	Road 1	444.9964521	81.67289886	-2.17E-05	0.234762907	0	0.011764706	461.8452	988.2988	643.0156	0.6832	3.8417	1739	1.152278764	0.002661764	78.74229014	0.18189469
113.3797951	×ÔÉí³µÁ¾	Road 1	445.3790039	81.68132401	-2.10E-05	0.235132545	0	0.011764706	462.3677	988.3066	642.9889	0.6849	3.84	1740	1.288011417	0.002975306	78.76400664	0.181944855
113.396359	×ÔÉí³µÁ¾	Road 1	445.7548531	81.6869133	-1.99E-05	0.234024107	0	0.011764706	462.7084	988.3125	642.9715	0.6852	3.8397	1741	1.173543893	0.002710886	78.78344515	0.181989758
113.4129849	×ÔÉí³µÁ¾	Road 1	446.1321315	81.69201508	-1.89E-05	0.234852776	0	0.011764706	463.0265	988.3174	642.9552	0.6861	3.8388	1742	1.15201086	0.002661145	78.80259835	0.182034002
113.4296042	×ÔÉí³µÁ¾	Road 1	446.5092834	81.69705505	-1.80E-05	0.234667793	0	0.011764706	463.3445	988.3223	642.939	0.687	3.8379	1743	1.149524278	0.002655401	78.82170263	0.182078133
113.44631	×ÔÉí³µÁ¾	Road 1	446.8884375	81.70545959	-1.70E-05	0.23504281	0	0.011764706	463.8672	988.3301	642.9123	0.6887	3.8362	1744	1.290699681	0.002981516	78.84326479	0.182127942
113.4629586	×ÔÉí³µÁ¾	Road 1	447.266318	81.7106781	-1.56E-05	0.234373599	0	0.011764706	464.1853	988.3359	642.8961	0.6886	3.8363	1745	1.156860442	0.002672348	78.86252492	0.182172433
113.4795966	×ÔÉí³µÁ¾	Road 1	447.6439819	81.71604767	-1.45E-05	0.234553501	0	0.011764706	464.5262	988.3408	642.8787	0.6899	3.835	1746	1.163469482	0.002687615	78.8818827	0.182217149
113.4963185	×ÔÉí³µÁ¾	Road 1	448.0235869	81.72372437	-1.36E-05	0.234557956	0	0.011764706	465.0034	988.3486	642.8542	0.6907	3.8341	1747	1.25984082	0.002910232	78.90294967	0.182265814
113.5129121	×ÔÉí³µÁ¾	Road 1	448.400303	81.72883301	-1.24E-05	0.234952644	0	0.011764706	465.3216	988.3535	642.838	0.6916	3.8332	1748	1.153108407	0.00266368	78.92208392	0.182310014
113.529586	×ÔÉí³µÁ¾	Road 1	448.7788658	81.73405838	-1.14E-05	0.234678075	0	0.011764706	465.6171	988.3584	642.8229	0.6921	3.8327	1749	1.157060649	0.00267281	78.94137664	0.18235458
113.5462915	×ÔÉí³µÁ¾	Road 1	449.1581785	81.74143295	-1.05E-05	0.234433219	0	0.011764706	466.0945	988.3652	642.7985	0.694	3.8309	1750	1.247594538	0.002881943	78.96221825	0.182402724
113.5629265	×ÔÉí³µÁ¾	Road 1	449.5359198	81.74718018	-9.48E-06	0.234627858	0	0.011764706	466.4582	988.3711	642.7799	0.6947	3.8302	1751	1.1798758	0.002725513	78.98184554	0.182448063
113.5796037	×ÔÉí³µÁ¾	Road 1	449.9146482	81.75399857	-8.72E-06	0.234418154	0	0.011764706	466.7538	988.376	642.7648	0.6952	3.8297	1752	1.22470502	0.002829069	79.0022702	0.182495244
113.5962784	×ÔÉí³µÁ¾	Road 1	450.2933458	81.75958099	-7.90E-06	0.234183878	0	0.011764706	467.2312	988.3838	642.7405	0.6961	3.8289	1753	1.172447275	0.002708353	79.02182033	0.182540405
113.6129372	×ÔÉí³µÁ¾	Road 1	450.6717107	81.76502609	-7.19E-06	0.23458375	0	0.011764706	467.5723	988.3887	642.7231	0.6974	3.8276	1754	1.16690457	0.00269555	79.04125965	0.18258531
113.6296331	×ÔÉí³µÁ¾	Road 1	451.0509498	81.77221527	-6.50E-06	0.23454307	0	0.011764706	467.8907	988.3936	642.7067	0.6983	3.8268	1755	1.240283126	0.002865054	79.06196729	0.182633144
113.6463265	×ÔÉí³µÁ¾	Road 1	451.4301441	81.77512665	-5.94E-06	0.234323382	0	0.011764706	468.2091	988.3984	642.6905	0.6992	3.8259	1756	1.059277331	0.002446931	79.07965016	0.182673992
113.6629707	×ÔÉí³µÁ¾	Road 1	451.8082581	81.78279648	-5.53E-06	0.234728307	0	0.011764706	468.6867	988.4063	642.6661	0.7	3.8251	1757	1.261757888	0.002914661	79.10065113	0.182722504
113.6796472	×ÔÉí³µÁ¾	Road 1	452.1871305	81.78833084	-5.22E-06	0.234488353	0	0.011764706	469.0278	988.4121	642.6487	0.7004	3.8248	1758	1.170691011	0.002704296	79.12017413	0.182767602
113.6962415	×ÔÉí³µÁ¾	Road 1	452.5641628	81.79381027	-5.19E-06	0.234008595	0	0.011764706	469.369	988.417	642.6312	0.7017	3.8235	1759	1.169570285	0.002701707	79.1395824	0.182812435
113.712966	×ÔÉí³µÁ¾	Road 1	452.9441786	81.79960556	-5.11E-06	0.234438419	0	0.011764706	469.733	988.4229	642.6127	0.7024	3.8228	1760	1.181165503	0.002728492	79.1593368	0.182858068
113.7295901	×ÔÉí³µÁ¾	Road 1	453.3219392	81.80544205	-5.11E-06	0.233958662	0	0.011764706	470.097	988.4287	642.5941	0.7032	3.822	1761	1.184460264	0.002736103	79.17902733	0.182903553
113.7462585	×ÔÉí³µÁ¾	Road 1	453.7007374	81.81187592	-5.11E-06	0.234628156	0	0.011764706	470.5065	988.4346	642.5731	0.7048	3.8205	1762	1.209206306	0.002793267	79.19918287	0.182950112
113.7629184	×ÔÉí³µÁ¾	Road 1	454.0793715	81.81780167	-5.11E-06	0.233514667	0	0.011764706	470.8706	988.4404	642.5546	0.7055	3.8198	1763	1.187846835	0.002743926	79.21897237	0.182995826
113.7796987	×ÔÉí³µÁ¾	Road 1	454.4607697	81.82459259	-5.11E-06	0.234348267	0	0.011764706	471.2347	988.4463	642.5359	0.7063	3.8191	1764	1.222574468	0.002824147	79.23948743	0.183043216
113.7962597	×ÔÉí³µÁ¾	Road 1	454.8372158	81.83112946	-5.11E-06	0.233704105	0	0.011764706	471.7126	988.4541	642.5115	0.7072	3.8182	1765	1.215588234	0.002808009	79.25961879	0.183089719
113.8129083	×ÔÉí³µÁ¾	Road 1	455.215679	81.83669128	-5.19E-06	0.234303698	0	0.011764706	472.0539	988.459	642.4941	0.7085	3.817	1766	1.172765232	0.002709088	79.27914371	0.183134822
113.8295858	×ÔÉí³µÁ¾	Road 1	455.5948357	81.84429932	-5.31E-06	0.233854473	0	0.011764706	472.5319	988.4668	642.4697	0.7093	3.8161	1767	1.259208695	0.002908772	79.30014425	0.183183333
113.8462858	×ÔÉí³µÁ¾	Road 1	455.9745244	81.84938736	-5.50E-06	0.234253481	0	0.011764706	472.8506	988.4717	642.4534	0.7103	3.8153	1768	1.152108221	0.00266137	79.31938438	0.183227778
113.8629157	×ÔÉí³µÁ¾	Road 1	456.3526447	81.8544548	-5.62E-06	0.233819157	0	0.011764706	473.1693	988.4766	642.4371	0.7112	3.8144	1769	1.152192122	0.002661564	79.33854524	0.18327204
113.8796171	×ÔÉí³µÁ¾	Road 1	456.7324268	81.86235123	-5.76E-06	0.234443501	0	0.011764706	473.6701	988.4844	642.4116	0.7124	3.8131	1770	1.27117465	0.002936413	79.35977563	0.183321082
113.8963255	×ÔÉí³µÁ¾	Road 1	457.1123912	81.86750107	-6.00E-06	0.233764321	0	0.011764706	473.9888	988.4893	642.3953	0.7134	3.8123	1771	1.154804643	0.002667599	79.37907053	0.183365653
113.9129755	×ÔÉí³µÁ¾	Road 1	457.4910554	81.87294617	-6.34E-06	0.234558254	0	0.011764706	474.3304	988.4951	642.3778	0.7137	3.812	1772	1.168170981	0.002698475	79.39852067	0.183410583
113.9296414	×ÔÉí³µÁ¾	Road 1	457.8701149	81.88090439	-6.79E-06	0.234118432	0	0.011764706	474.8313	988.5029	642.3522	0.715	3.8107	1773	1.274732118	0.002944631	79.41976515	0.183459658
113.9462834	×ÔÉí³µÁ¾	Road 1	458.2486472	81.88407669	-7.36E-06	0.234802857	0	0.011764706	475.0135	988.5059	642.3429	0.7154	3.8104	1774	1.071763959	0.002475775	79.43760147	0.183500859
113.9629269	×ÔÉí³µÁ¾	Road 1	458.6272467	81.89141006	-8.01E-06	0.233234912	0	0.011764706	475.4917	988.5137	642.3185	0.7162	3.8095	1775	1.248744288	0.002884599	79.45838492	0.183548869
113.979596	×ÔÉí³µÁ¾	Road 1	459.0064667	81.89937515	-9.00E-06	0.233204961	0	0.011764706	475.9928	988.5215	642.2929	0.7175	3.8083	1776	1.275176639	0.002945658	79.47964102	0.183597971
113.9962391	×ÔÉí³µÁ¾	Road 1	459.3851064	81.90189514	-9.77E-06	0.233589321	0	0.011764706	476.1523	988.5234	642.2848	0.7185	3.8074	1777	1.044182539	0.002412062	79.49701947	0.183638115
114.0129024	×ÔÉí³µÁ¾	Road 1	459.7642416	81.90987396	-1.09E-05	0.233164728	0	0.011764706	476.6534	988.5313	642.2592	0.7198	3.8061	1778	1.276004017	0.002947569	79.51828188	0.183687231
114.0296331	×ÔÉí³µÁ¾	Road 1	460.1449344	81.91481094	-1.20E-05	0.233779222	0	0.011764706	476.9723	988.5361	642.2429	0.7207	3.8052	1779	1.146001107	0.002647263	79.5374553	0.183731522
114.0463301	×ÔÉí³µÁ¾	Road 1	460.5249005	81.92360001	-1.32E-05	0.233115375	0	0.011764706	477.5191	988.5449	642.215	0.7218	3.804	1780	1.30983506	0.003025719	79.55932562	0.183782042
114.0629179	×ÔÉí³µÁ¾	Road 1	460.9024042	81.92864685	-1.44E-05	0.234787643	0	0.011764706	477.838	988.5498	642.1986	0.7227	3.8031	1781	1.152633603	0.002662584	79.57844523	0.183826208
114.0795947	×ÔÉí³µÁ¾	Road 1	461.2819597	81.93398895	-1.54E-05	0.233714089	0	0.011764706	478.1798	988.5557	642.1812	0.7231	3.8028	1782	1.16407395	0.002689011	79.59785831	0.183871053
114.0962617	×ÔÉí³µÁ¾	Road 1	461.6613138	81.93912506	-1.63E-05	0.23388876	0	0.011764706	478.4988	988.5605	642.1649	0.724	3.8018	1783	1.155511467	0.002669231	79.61711715	0.183915541
114.1128828	×ÔÉí³µÁ¾	Road 1	462.0396567	81.94600525	-1.72E-05	0.23343955	0	0.011764706	478.8407	988.5654	642.1474	0.7253	3.8005	1784	1.230489353	0.00284243	79.63756926	0.183962785
114.1296168	×ÔÉí³µÁ¾	Road 1	462.4205997	81.95248718	-1.77E-05	0.234258533	0	0.011764706	479.3421	988.5742	642.1218	0.7256	3.8002	1785	1.211731247	0.002799099	79.6578464	0.184009625
114.1462728	×ÔÉí³µÁ¾	Road 1	462.7997887	81.95754089	-1.80E-05	0.233389318	0	0.011764706	479.6612	988.5791	642.1055	0.7266	3.7993	1786	1.152344204	0.002661915	79.67703978	0.184053962
114.1628814	×ÔÉí³µÁ¾	Road 1	463.1779256	81.96284866	-1.82E-05	0.233194679	0	0.011764706	480.0031	988.584	642.088	0.7279	3.798	1787	1.163845603	0.002688483	79.6963697	0.184098614
114.1795839	×ÔÉí³µÁ¾	Road 1	463.5582247	81.96837616	-1.82E-05	0.233349666	0	0.011764706	480.345	988.5898	642.0706	0.7282	3.7976	1788	1.171950247	0.002707205	79.71594419	0.184143831
114.1962226	×ÔÉí³µÁ¾	Road 1	463.9371031	81.97521515	-1.82E-05	0.233774304	0	0.011764706	480.7781	988.5967	642.0485	0.7293	3.7966	1789	1.228756975	0.002838429	79.73638913	0.184191059
114.2129556	×ÔÉí³µÁ¾	Road 1	464.3181535	81.98098297	-1.82E-05	0.232889876	0	0.011764706	481.1429	988.6025	642.0298	0.73	3.7958	1790	1.181832845	0.002730034	79.75616465	0.18423674
114.2296166	×ÔÉí³µÁ¾	Road 1	464.6976041	81.98882446	-1.82E-05	0.234358385	0	0.011764706	481.6445	988.6104	642.0042	0.7313	3.7945	1791	1.271149928	0.002936356	79.77734337	0.184285663
114.246248	×ÔÉí³µÁ¾	Road 1	465.0764021	81.9939537	-1.82E-05	0.232845306	0	0.011764706	481.9637	988.6152	641.9879	0.7323	3.7936	1792	1.15625821	0.002670956	79.79657355	0.184330085
114.2629509	×ÔÉí³µÁ¾	Road 1	465.4568517	81.99900742	-1.82E-05	0.23411873	0	0.011764706	482.283	988.6201	641.9716	0.7332	3.7927	1793	1.152171491	0.002661516	79.81581811	0.18437454
114.2796332	×ÔÉí³µÁ¾	Road 1	465.8368702	82.00691071	-1.82E-05	0.233654186	0	0.011764706	482.7847	988.6279	641.9459	0.7345	3.7914	1794	1.273564166	0.002941933	79.83706414	0.184423618
114.3129407	×ÔÉí³µÁ¾	Road 1	466.5956981	82.01699753	-1.82E-05	0.233609304	0	0.011764706	483.4233	988.6377	641.9133	0.7363	3.7895	1795	1.152546017	0.002662381	79.87545256	0.184512295
114.3295589	×ÔÉí³µÁ¾	Road 1	466.9743386	82.02492828	-1.82E-05	0.233119845	0	0.011764706	483.9252	988.6455	641.8877	0.7376	3.7882	1796	1.27624576	0.002948128	79.89666145	0.184561288
114.3462401	×ÔÉí³µÁ¾	Road 1	467.3544306	82.02814865	-1.82E-05	0.233165011	0	0.011764706	484.1305	988.6494	641.8772	0.7374	3.7884	1797	1.074846639	0.002482896	79.91459122	0.184602706
114.3629551	×ÔÉí³µÁ¾	Road 1	467.7353256	82.03561249	-1.82E-05	0.232920125	0	0.011764706	484.6096	988.6563	641.8527	0.7393	3.7865	1798	1.254612159	0.002898154	79.93556201	0.184651148
114.3795993	×ÔÉí³µÁ¾	Road 1	468.1146317	82.04063873	-1.82E-05	0.233754322	0	0.011764706	484.929	988.6611	641.8364	0.7402	3.7856	1799	1.152190124	0.002661559	79.95473931	0.184695448
114.3962347	×ÔÉí³µÁ¾	Road 1	468.4937793	82.04971619	-1.82E-05	0.233025208	0	0.011764706	485.4994	988.6709	641.8073	0.7408	3.785	1800	1.32506239	0.003060894	79.97678228	0.184746367
114.4128779	×ÔÉí³µÁ¾	Road 1	468.8731252	82.05466003	-1.82E-05	0.233474284	0	0.011764706	485.8189	988.6758	641.7909	0.7417	3.7841	1801	1.148839417	0.002653819	79.99590255	0.184790535
114.4302094	×ÔÉí³µÁ¾	Road 1	469.2681961	82.06182861	-1.82E-05	0.233209431	0	0.011764706	486.2753	988.6826	641.7676	0.7432	3.7826	1802	1.231572115	0.002844932	80.01724755	0.184839842
114.4478953	×ÔÉí³µÁ¾	Road 1	469.6713735	82.06724625	-1.82E-05	0.233654469	0	0.011764706	486.6176	988.6885	641.7501	0.7436	3.7823	1803	1.155545562	0.00266931	80.03768449	0.184887051
114.4650326	×ÔÉí³µÁ¾	Road 1	470.062066	82.07234802	-1.82E-05	0.23253575	0	0.011764706	486.9372	988.6934	641.7338	0.7445	3.7814	1804	1.149483672	0.002655307	80.05738346	0.184932556
114.4795661	×ÔÉí³µÁ¾	Road 1	470.3934222	82.07764206	-1.82E-05	0.233619303	0	0.011764706	487.2796	988.6982	641.7163	0.7458	3.78	1805	1.196749289	0.002764491	80.07477652	0.184972734
114.4962884	×ÔÉí³µÁ¾	Road 1	470.7747028	82.08266144	-1.82E-05	0.232740104	0	0.011764706	487.5992	988.7031	641.7	0.7467	3.7791	1806	1.15133525	0.002659584	80.09402948	0.185017208
114.5128762	×ÔÉí³µÁ¾	Road 1	471.1529493	82.08985748	-1.82E-05	0.23396866	0	0.011764706	487.9644	988.709	641.6813	0.7475	3.7783	1807	1.246220579	0.00287877	80.1147015	0.18506496
114.5295974	×ÔÉí³µÁ¾	Road 1	471.5342669	82.09603043	-1.82E-05	0.232445598	0	0.011764706	488.4438	988.7168	641.6569	0.7484	3.7774	1808	1.200429745	0.002772993	80.13477411	0.185111328
114.5463006	×ÔÉí³µÁ¾	Road 1	471.9151983	82.1010704	-1.82E-05	0.232835323	0	0.011764706	488.7635	988.7217	641.6405	0.7493	3.7765	1809	1.152644166	0.002662608	80.15402699	0.185155802
114.5628858	×ÔÉí³µÁ¾	Road 1	472.2934627	82.10643311	-1.85E-05	0.232410714	0	0.011764706	489.106	988.7275	641.623	0.7497	3.7761	1810	1.168029639	0.002698148	80.173399	0.185200552
114.5795762	×ÔÉí³µÁ¾	Road 1	472.6741658	82.11494064	-1.85E-05	0.233419582	0	0.011764706	489.6541	988.7354	641.595	0.7518	3.774	1811	1.300372853	0.003003861	80.19510274	0.185250687
114.5963344	×ÔÉí³µÁ¾	Road 1	473.056439	82.11993942	-1.87E-05	0.233049959	0	0.011764706	489.9738	988.7412	641.5787	0.7518	3.774	1812	1.150392992	0.002657408	80.21438128	0.185295221
114.6129182	×ÔÉí³µÁ¾	Road 1	473.4347672	82.12755432	-1.87E-05	0.232505798	0	0.011764706	490.4534	988.748	641.5541	0.7536	3.7722	1813	1.264654289	0.002921351	80.23535397	0.185343668
114.6295862	×ÔÉí³µÁ¾	Road 1	473.8150386	82.13185959	-1.87E-05	0.19629319	0	0.019607844	490.7732	988.7529	641.5378	0.7545	3.7712	1814	1.122131374	0.002592123	80.2540577	0.185386873
114.6462682	×ÔÉí³µÁ¾	Road 1	474.1956319	82.13273849	-1.89E-05	0.103982225	0	0.027450981	491.1386	988.7588	641.5192	0.7553	3.7705	1815	0.976205935	0.002255036	80.27034274	0.185424492
114.6629018	×ÔÉí³µÁ¾	Road 1	474.5751039	82.12896881	-1.92E-05	0.050070979	0	0.027450981	491.5041	988.7646	641.5005	0.756	3.7697	1816	0.938780869	0.002168584	80.28595803	0.185460563
114.679568	×ÔÉí³µÁ¾	Road 1	474.9553009	82.12480774	-1.95E-05	0.041326292	0	0.043137256	491.8239	988.7695	641.4841	0.7569	3.7688	1817	0.938748505	0.002168509	80.30160341	0.185496704
114.6962466	×ÔÉí³µÁ¾	Road 1	475.3357475	82.11730957	-1.99E-05	-0.059040226	0	0.050980393	492.1664	988.7754	641.4667	0.7572	3.7684	1818	0.938690186	0.002168374	80.31725951	0.185532869
114.7128725	×ÔÉí³µÁ¾	Road 1	475.7148763	82.09268646	-2.02E-05	-0.228075609	0	0.06666667	492.7144	988.7842	641.4387	0.7584	3.7672	1819	0.938498672	0.002167932	80.33286288	0.185568913
114.7295585	×ÔÉí³µÁ¾	Road 1	476.0952799	82.0719635	-2.04E-05	-0.338160992	0	0.090196081	493.034	988.7891	641.4224	0.7592	3.7663	1820	0.938337494	0.00216756	80.34851999	0.185605081
114.7462981	×ÔÉí³µÁ¾	Road 1	476.4767603	82.04114685	-2.04E-05	-0.532007456	0	0.105882354	493.3763	988.7939	641.4049	0.7605	3.765	1821	0.938097809	0.002167006	80.36422329	0.185641356
114.762943	×ÔÉí³µÁ¾	Road 1	476.8557967	81.97868271	-2.04E-05	-0.693525255	0	0.121568628	493.8781	988.8018	641.3792	0.7618	3.7637	1822	0.937611977	0.002165884	80.3798298	0.185677407
114.779522	×ÔÉí³µÁ¾	Road 1	477.2331252	81.93409882	-2.04E-05	-0.769561112	0	0.137254909	494.1972	988.8066	641.3629	0.7627	3.7628	1823	0.937265213	0.002165083	80.39536869	0.185713302
114.7962938	×ÔÉí³µÁ¾	Road 1	477.6146231	81.8871048	-2.04E-05	-0.838894546	0	0.152941182	494.5161	988.8125	641.3466	0.7626	3.7628	1824	0.936899704	0.002164238	80.41108216	0.1857496
114.8129413	×ÔÉí³µÁ¾	Road 1	477.9929275	81.80776978	-2.04E-05	-0.961510956	0	0.152941182	494.9941	988.8193	641.3223	0.7644	3.761	1825	0.936282654	0.002162813	80.42666894	0.185785605
114.8295976	×ÔÉí³µÁ¾	Road 1	478.3711799	81.75331879	-2.04E-05	-0.917196572	0	0.152941182	495.3125	988.8242	641.3059	0.7653	3.7601	1826	0.935859146	0.002161835	80.4422569	0.185821613
114.8463345	×ÔÉí³µÁ¾	Road 1	478.7510273	81.70247269	-2.04E-05	-0.84916687	0	0.152941182	495.6307	988.8291	641.2897	0.7661	3.7592	1827	0.935463676	0.002160921	80.45791371	0.185857781
114.862959	×ÔÉí³µÁ¾	Road 1	479.1279783	81.62831497	-2.04E-05	-0.867710471	0	0.152941182	496.1076	988.8369	641.2653	0.7669	3.7583	1828	0.934886894	0.002159589	80.47345566	0.185893683
114.8796068	×ÔÉí³µÁ¾	Road 1	479.5052225	81.5767067	-2.04E-05	-0.909861863	0	0.152941182	496.4253	988.8418	641.2491	0.7678	3.7575	1829	0.934485497	0.002158661	80.48901287	0.18592962
114.8962474	×ÔÉí³µÁ¾	Road 1	479.8819362	81.49787292	-2.04E-05	-0.894563377	0	0.152941182	496.9015	988.8496	641.2247	0.7686	3.7568	1830	0.933872345	0.002157245	80.50455302	0.185965517
114.9128817	×ÔÉí³µÁ¾	Road 1	480.2582726	81.44673843	-2.04E-05	-0.869432986	0	0.152941182	497.2187	988.8545	641.2086	0.7694	3.756	1831	0.933474632	0.002156326	80.52008073	0.186001386
114.9295644	×ÔÉí³µÁ¾	Road 1	480.6354511	81.39222565	-2.04E-05	-0.898389995	0	0.160784319	497.5583	988.8594	641.1912	0.7707	3.7549	1832	0.933050644	0.002155347	80.53564654	0.186037343
114.9461206	×ÔÉí³µÁ¾	Road 1	481.0095218	81.33819351	-2.04E-05	-0.97591269	0	0.160784319	497.8752	988.8652	641.175	0.7705	3.7551	1833	0.932630394	0.002154376	80.55108739	0.186073012
114.9628858	×ÔÉí³µÁ¾	Road 1	481.3878991	81.24925232	-2.04E-05	-0.989804924	0	0.160784319	498.3725	988.873	641.1497	0.7717	3.754	1834	0.931938629	0.002152778	80.56671151	0.186109104
114.9795832	×ÔÉí³µÁ¾	Road 1	481.7644914	81.19438248	-2.04E-05	-0.960328043	0	0.168627456	498.6888	988.8779	641.1335	0.7726	3.7531	1835	0.931511864	0.002151792	80.5822653	0.186145033
114.9962204	×ÔÉí³µÁ¾	Road 1	482.1394475	81.13370361	-2.04E-05	-1.017352462	0	0.168627456	499.0273	988.8828	641.1161	0.7738	3.7518	1836	0.931039917	0.002150702	80.59775525	0.186180815
115.0129339	×ÔÉí³µÁ¾	Road 1	482.5156916	81.0410408	-2.04E-05	-1.034329534	0	0.168627456	499.5234	988.8906	641.0908	0.7749	3.7504	1837	0.930319206	0.002149037	80.61330413	0.186216733
115.0296254	×ÔÉí³µÁ¾	Road 1	482.8911728	80.98327332	-2.04E-05	-0.995813668	0	0.168627456	499.8388	988.8955	641.0747	0.7758	3.7494	1838	0.929869904	0.002147999	80.62882506	0.186252586
115.0462304	×ÔÉí³µÁ¾	Road 1	483.2644296	80.92291718	-2.04E-05	-0.983938992	0	0.168627456	500.1765	988.9014	641.0575	0.776	3.7491	1839	0.929400467	0.002146915	80.64425774	0.186288235
115.062886	×ÔÉí³µÁ¾	Road 1	483.638562	80.86639252	-2.04E-05	-0.981554687	0	0.160784319	500.4915	988.9063	641.0414	0.7769	3.7482	1840	0.928960831	0.0021459	80.65973012	0.186323977
115.0816922	×ÔÉí³µÁ¾	Road 1	484.0605367	80.77717667	-2.04E-05	-0.914084494	0	0.160784319	501.0085	988.9141	641.015	0.7785	3.7467	1841	0.92826693	0.002144297	80.67718726	0.186364303
115.0962016	×ÔÉí³µÁ¾	Road 1	484.3859032	80.72835617	-2.04E-05	-0.918296456	0	0.160784319	501.3004	988.9189	641.0001	0.779	3.7464	1842	0.927887215	0.002143419	80.69065034	0.186395402
115.1129612	×ÔÉí³µÁ¾	Road 1	484.7613596	80.64850616	-2.04E-05	-0.906753063	0	0.152941182	501.7716	988.9258	640.976	0.7807	3.7447	1843	0.927266159	0.002141985	80.70619103	0.186431301
115.1295446	×ÔÉí³µÁ¾	Road 1	485.1326309	80.59743347	-2.04E-05	-0.857916594	0	0.152941182	502.0855	988.9307	640.96	0.7816	3.7439	1844	0.926868927	0.002141067	80.72156164	0.186466807
115.1462566	×ÔÉí³µÁ¾	Road 1	485.5065549	80.54833832	-2.04E-05	-0.825974345	0	0.145098045	502.3992	988.9355	640.9439	0.7824	3.743	1845	0.926487076	0.002140185	80.73704511	0.186502574
115.1628888	×ÔÉí³µÁ¾	Road 1	485.878364	80.4776001	-2.04E-05	-0.673080087	0	0.129411772	502.8918	988.9434	640.9188	0.7835	3.7419	1846	0.92593689	0.002138914	80.75244541	0.186538149
115.1795737	×ÔÉí³µÁ¾	Road 1	486.251178	80.43980026	-2.04E-05	-0.582975745	0	0.121568628	503.205	988.9482	640.9027	0.7842	3.741	1847	0.925642891	0.002138235	80.76788967	0.186573825
115.1962542	×ÔÉí³µÁ¾	Road 1	486.6237328	80.4050766	-2.04E-05	-0.530038297	0	0.105882354	503.5182	988.9531	640.8867	0.785	3.7402	1848	0.925372818	0.002137611	80.78332535	0.186609482
115.2128793	×ÔÉí³µÁ¾	Road 1	486.994896	80.3714447	-2.04E-05	-0.463746786	0	0.105882354	503.8535	988.959	640.8696	0.7851	3.74	1849	0.925111237	0.002137007	80.79870547	0.18664501
115.2296038	×ÔÉí³µÁ¾	Road 1	487.3680482	80.32221222	-2.04E-05	-0.461854428	0	0.098039217	504.3674	988.9668	640.8434	0.7867	3.7384	1850	0.924728317	0.002136122	80.81417108	0.186680735
115.246244	×ÔÉí³µÁ¾	Road 1	487.739184	80.29290619	-2.04E-05	-0.441329092	0	0.098039217	504.6801	988.9717	640.8275	0.7876	3.7376	1851	0.924500381	0.002135596	80.82955494	0.186716272
115.2629853	×ÔÉí³µÁ¾	Road 1	488.1124439	80.2644722	-2.04E-05	-0.428058922	0	0.098039217	504.9927	988.9766	640.8114	0.7886	3.7368	1852	0.924279228	0.002135085	80.84502862	0.186752016
115.2796021	×ÔÉí³µÁ¾	Road 1	488.4827844	80.23397827	-2.04E-05	-0.436888516	0	0.098039217	505.3274	988.9814	640.7943	0.79	3.7355	1853	0.924042053	0.002134537	80.86038317	0.186787485
115.2962679	×ÔÉí³µÁ¾	Road 1	488.8540657	80.2007103	-2.02E-05	-0.45138669	0	0.098039217	505.6844	988.9873	640.7761	0.7906	3.7349	1854	0.923783302	0.002133939	80.8757788	0.186823049
115.3128861	×ÔÉí³µÁ¾	Road 1	489.2241112	80.16299286	-2.02E-05	-0.445858479	0	0.098039217	506.0858	988.9932	640.7556	0.792	3.7334	1855	0.923489944	0.002133262	80.89112553	0.1868585
115.3296143	×ÔÉí³µÁ¾	Road 1	489.5963957	80.11787338	-2.02E-05	-0.436858952	0	0.098039217	506.5761	989.001	640.7305	0.793	3.7324	1856	0.923139015	0.002132451	80.90656794	0.186894172
115.3462618	×ÔÉí³µÁ¾	Road 1	489.9667528	80.08917847	-2.02E-05	-0.440444231	0	0.098039217	506.8879	989.0059	640.7146	0.7938	3.7316	1857	0.922915833	0.002131936	80.9219322	0.186929663
115.3628807	×ÔÉí³µÁ¾	Road 1	490.3363301	80.05801849	-2.02E-05	-0.445208699	0	0.098039217	507.222	989.0117	640.6976	0.7939	3.7315	1858	0.922673477	0.002131376	80.93726604	0.186965085
115.3795476	×ÔÉí³µÁ¾	Road 1	490.7067734	80.01444397	-2.02E-05	-0.441888452	0	0.098039217	507.6894	989.0186	640.6737	0.7955	3.7299	1859	0.922334564	0.002130593	80.95263853	0.187000595
115.3962223	×ÔÉí³µÁ¾	Road 1	491.0772551	79.98579025	-2.01E-05	-0.439710528	0	0.098039217	508.0009	989.0234	640.6577	0.7962	3.7291	1860	0.922111702	0.002130078	80.96801441	0.187036113
115.4129152	×ÔÉí³µÁ¾	Road 1	491.4480097	79.95681381	-2.01E-05	-0.439874887	0	0.098039217	508.3122	989.0283	640.6418	0.797	3.7284	1861	0.92188633	0.002129557	80.98340343	0.187071662
115.4296119	×ÔÉí³µÁ¾	Road 1	491.8186255	79.90933228	-1.99E-05	-0.442402452	0	0.098039217	508.8235	989.0361	640.6157	0.7984	3.7269	1862	0.921517029	0.002128704	80.99878966	0.187107204
115.4462029	×ÔÉí³µÁ¾	Road 1	492.186765	79.88049316	-1.99E-05	-0.442222714	0	0.098039217	509.1346	989.041	640.5999	0.7991	3.7262	1863	0.921292725	0.002128186	81.01407489	0.187142513
115.4642632	×ÔÉí³µÁ¾	Road 1	492.5872974	79.8393631	-1.95E-05	-0.440345466	0	0.098039217	509.4677	989.0469	640.5829	0.7992	3.726	1864	0.920972824	0.002127447	81.03070786	0.187180935
115.479656	×ÔÉí³µÁ¾	Road 1	492.9285317	79.80639725	-1.93E-05	-0.441503018	0	0.098039217	509.934	989.0537	640.559	0.8008	3.7245	1865	0.920716423	0.002126855	81.04488026	0.187213673
115.4962851	×ÔÉí³µÁ¾	Road 1	493.2970406	79.77733841	-1.89E-05	-0.440983623	0	0.098039217	510.2446	989.0586	640.5432	0.8016	3.7237	1866	0.92049041	0.002126333	81.06018726	0.187249033
115.5129132	×ÔÉí³µÁ¾	Road 1	493.6653257	79.73414154	-1.85E-05	-0.441183895	0	0.098039217	510.7104	989.0664	640.5193	0.8022	3.7231	1867	0.920154434	0.002125557	81.07548767	0.187284377
115.5295351	×ÔÉí³µÁ¾	Road 1	494.0333395	79.70529556	-1.80E-05	-0.440334946	0	0.098039217	511.0208	989.0713	640.5035	0.803	3.7224	1868	0.919930077	0.002125038	81.09077862	0.187319699
115.5795704	×ÔÉí³µÁ¾	Road 1	495.1397347	79.60428314	-1.74E-05	-0.440929115	0	0.098039217	512.1063	989.0879	640.4481	0.8061	3.7194	1869	0.919144424	0.002123224	81.13676827	0.187425935
115.5961966	×ÔÉí³µÁ¾	Road 1	495.5072468	79.57556763	-1.70E-05	-0.439845473	0	0.098039217	512.4161	989.0928	640.4323	0.8068	3.7187	1870	0.918921082	0.002122708	81.15204648	0.187461227
115.612898	×ÔÉí³µÁ¾	Road 1	495.8762172	79.53185577	-1.58E-05	-0.379531562	0	0.090196081	512.9028	989.1006	640.4073	0.8079	3.7177	1871	0.9185811	0.002121922	81.16738807	0.187496666
115.6296386	×ÔÉí³µÁ¾	Road 1	496.245949	79.509272	-1.56E-05	-0.337356567	0	0.090196081	513.1903	989.1055	640.3927	0.8082	3.7174	1872	0.918405449	0.002121517	81.18276275	0.187532182
115.6462194	×ÔÉí³µÁ¾	Road 1	496.6120429	79.48580246	-1.54E-05	-0.326904207	0	0.082352944	513.4999	989.1104	640.3768	0.8089	3.7167	1873	0.918222908	0.002121095	81.19798762	0.187567351
115.6632914	×ÔÉí³µÁ¾	Road 1	496.9888611	79.46031418	-1.51E-05	-0.292978853	0	0.074509807	513.8535	989.1152	640.3588	0.8105	3.7152	1874	0.918024666	0.002120637	81.21366012	0.187603555
115.6795189	×ÔÉí³µÁ¾	Road 1	497.3468989	79.42941513	-1.50E-05	-0.209642857	0	0.074509807	514.3616	989.123	640.3329	0.8119	3.7138	1875	0.91778434	0.002120082	81.22855341	0.187637958
115.6962499	×ÔÉí³µÁ¾	Road 1	497.7159613	79.41053925	-1.50E-05	-0.235147238	0	0.074509807	514.6929	989.1289	640.3159	0.8121	3.7137	1876	0.917637527	0.002119743	81.24390649	0.187673424
115.7128421	×ÔÉí³µÁ¾	Road 1	498.0818701	79.39118271	-1.50E-05	-0.25123316	0	0.06666667	515.0021	989.1338	640.3001	0.8128	3.713	1877	0.917486977	0.002119395	81.25912958	0.187708589
115.729622	×ÔÉí³µÁ¾	Road 1	498.451835	79.37343979	-1.50E-05	-0.191713378	0	0.06666667	515.3112	989.1387	640.2843	0.8135	3.7123	1878	0.917348976	0.002119076	81.27452255	0.187744147
115.7462178	×ÔÉí³µÁ¾	Road 1	498.8176331	79.34963379	-1.50E-05	-0.14449425	0	0.06666667	515.8188	989.1465	640.2584	0.8149	3.7109	1879	0.917163818	0.002118648	81.28974365	0.187779308
115.7629181	×ÔÉí³µÁ¾	Road 1	499.1856651	79.33482971	-1.50E-05	-0.15937683	0	0.05882353	516.1277	989.1514	640.2427	0.8157	3.7102	1880	0.917048676	0.002118382	81.30505863	0.187814685
115.7795293	×ÔÉí³µÁ¾	Road 1	499.5516708	79.3210968	-1.50E-05	-0.126545295	0	0.05882353	516.4365	989.1563	640.2268	0.8164	3.7095	1881	0.916941864	0.002118136	81.32029016	0.18784987
115.7961863	×ÔÉí³µÁ¾	Road 1	499.9186253	79.30794754	-1.50E-05	-0.103073128	0	0.05882353	516.7674	989.1611	640.21	0.8175	3.7083	1882	0.916839592	0.002117899	81.335562	0.187885148
115.8128423	×ÔÉí³µÁ¾	Road 1	500.2854699	79.28945618	-1.50E-05	-0.131579533	0	0.05882353	517.2305	989.168	640.1863	0.8191	3.7068	1883	0.91669577	0.002117567	81.35083043	0.187920418
115.8295562	×ÔÉí³µÁ¾	Road 1	500.6534944	79.26882248	-1.50E-05	-0.141777322	0	0.05882353	517.6935	989.1758	640.1626	0.8197	3.7062	1884	0.916535286	0.002117197	81.36614928	0.187955805
115.8462506	×ÔÉí³µÁ¾	Road 1	501.0210592	79.26195602	-1.50E-05	-0.134006545	0	0.05882353	517.8478	989.1777	640.1548	0.8205	3.7053	1885	0.91648188	0.002117073	81.38144942	0.187991148
115.8628878	×ÔÉí³µÁ¾	Road 1	501.3872647	79.24023056	-1.48E-05	-0.116582274	0	0.05882353	518.3768	989.1865	640.1277	0.8214	3.7045	1886	0.916312904	0.002116683	81.39669435	0.188026364
115.8795082	×ÔÉí³µÁ¾	Road 1	501.7530355	79.22648392	-1.47E-05	-0.127319619	0	0.05882353	518.7073	989.1914	640.1108	0.8225	3.7034	1887	0.916205986	0.002116436	81.41192205	0.18806154
115.8961708	×ÔÉí³µÁ¾	Road 1	502.1196778	79.21434402	-1.46E-05	-0.1354651	0	0.05882353	518.9938	989.1963	640.0963	0.8228	3.703	1888	0.916111565	0.002116218	81.4271868	0.188096802
115.9128949	×ÔÉí³µÁ¾	Road 1	502.4875857	79.19507675	-1.45E-05	-0.130995154	0	0.05882353	519.3682	989.2021	640.077	0.8237	3.7021	1889	0.915961708	0.002115872	81.44250545	0.188132188
115.9294995	×ÔÉí³µÁ¾	Road 1	502.8527926	79.17943497	-1.44E-05	-0.122060597	0	0.05882353	519.8087	989.209	640.0546	0.8249	3.7009	1890	0.91584005	0.002115591	81.45771264	0.188167316
115.9470444	×ÔÉí³µÁ¾	Road 1	503.2385803	79.15917892	-1.44E-05	-0.128768027	0	0.05882353	520.293	989.2168	640.0298	0.8259	3.6999	1891	0.915682503	0.002115227	81.47377814	0.188204428
115.9628631	×ÔÉí³µÁ¾	Road 1	503.5863555	79.14609146	-1.44E-05	-0.130995318	0	0.05882353	520.6012	989.2217	640.0141	0.8266	3.6992	1892	0.915580711	0.002114991	81.48826147	0.188237884
115.9795179	×ÔÉí³µÁ¾	Road 1	503.9524518	79.13292847	-1.44E-05	-0.129052341	0	0.05882353	520.9094	989.2256	639.9983	0.8283	3.6975	1893	0.915478333	0.002114755	81.50350862	0.188273105
116.0128394	×ÔÉí³µÁ¾	Road 1	504.6846963	79.11068115	-1.43E-05	-0.12563628	0	0.05882353	521.4374	989.2344	639.9714	0.8291	3.6967	1894	0.915305298	0.002114355	81.53400789	0.188343558
116.0294832	×ÔÉí³µÁ¾	Road 1	505.0503276	79.08465042	-1.41E-05	-0.128663063	0	0.05882353	522.0534	989.2441	639.9399	0.8305	3.6953	1895	0.915102837	0.002113888	81.54923872	0.188378741
116.0795291	×ÔÉí³µÁ¾	Road 1	506.1491505	79.04266891	-1.39E-05	-0.126844868	0	0.05882353	523.0428	989.2598	639.8893	0.8329	3.693	1896	0.914776314	0.002113133	81.59501954	0.188484495
116.098704	×ÔÉí³µÁ¾	Road 1	506.5700524	79.02233734	-1.39E-05	-0.127514228	0	0.05882353	523.5264	989.2666	639.8647	0.8348	3.691	1897	0.914618179	0.002112768	81.61255727	0.188525007
116.1129173	×ÔÉí³µÁ¾	Road 1	506.8819902	79.00927734	-1.36E-05	-0.127868831	0	0.05882353	523.834	989.2715	639.8489	0.8355	3.6903	1898	0.914516602	0.002112533	81.62555549	0.188555033
116.1295116	×ÔÉí³µÁ¾	Road 1	507.2461266	78.99616241	-1.36E-05	-0.12711975	0	0.05882353	524.1416	989.2764	639.8332	0.8362	3.6896	1899	0.914414597	0.002112298	81.64072962	0.188590085
116.1462009	×ÔÉí³µÁ¾	Road 1	507.6122774	78.98131714	-1.35E-05	-0.126999915	0	0.05882353	524.4931	989.2822	639.8152	0.8368	3.6891	1900	0.914299133	0.002112031	81.65598863	0.188625334
116.1628393	×ÔÉí³µÁ¾	Road 1	507.9772375	78.96554489	-1.35E-05	-0.12706998	0	0.05882353	524.8665	989.2881	639.7962	0.8377	3.6882	1901	0.91417646	0.002111748	81.67119902	0.18866047
116.1795139	×ÔÉí³µÁ¾	Road 1	508.3429251	78.95074768	-1.35E-05	-0.127654031	0	0.05882353	525.2178	989.2939	639.7783	0.8382	3.6876	1902	0.914061371	0.002111482	81.68644066	0.188695678
116.1962318	×ÔÉí³µÁ¾	Road 1	508.7094922	78.93587494	-1.35E-05	-0.127134606	0	0.05882353	525.5691	989.2988	639.7603	0.8397	3.6861	1903	0.913945694	0.002111215	81.70171991	0.188730973
116.2128866	×ÔÉí³µÁ¾	Road 1	509.0745863	78.91629868	-1.35E-05	-0.127284393	0	0.05882353	526.03	989.3066	639.7368	0.8403	3.6856	1904	0.913793434	0.002110863	81.716939	0.188766129
116.2295331	×ÔÉí³µÁ¾	Road 1	509.4394355	78.90330734	-1.35E-05	-0.127234459	0	0.05882353	526.3372	989.3115	639.7211	0.841	3.6849	1905	0.91369239	0.002110629	81.7321487	0.188801263
116.2461784	×ÔÉí³µÁ¾	Road 1	509.8041671	78.8830925	-1.35E-05	-0.127179816	0	0.05882353	526.8199	989.3184	639.6964	0.8429	3.6829	1906	0.913535164	0.002110266	81.74735478	0.18883639
116.2795431	×ÔÉí³µÁ¾	Road 1	510.5349508	78.8505043	-1.35E-05	-0.125971079	0	0.05882353	527.5876	989.3311	639.6572	0.8442	3.6817	1907	0.9132817	0.002109681	81.77782612	0.188906778
116.2961667	×ÔÉí³µÁ¾	Road 1	510.8989978	78.83744431	-1.35E-05	-0.12699464	0	0.05882353	527.8946	989.3359	639.6415	0.8449	3.681	1908	0.913180122	0.002109446	81.79300655	0.188941845
116.3128865	×ÔÉí³µÁ¾	Road 1	511.2650859	78.82409592	-1.35E-05	-0.150656864	0	0.06666667	528.2015	989.3398	639.6259	0.8465	3.6793	1909	0.913076302	0.002109206	81.80827293	0.18897711
116.3296223	×ÔÉí³µÁ¾	Road 1	511.6314064	78.79812012	-1.38E-05	-0.229663625	0	0.06666667	528.6837	989.3477	639.6012	0.8475	3.6784	1910	0.912874268	0.00210874	81.82355066	0.189012402
116.3462211	×ÔÉí³µÁ¾	Road 1	511.9946784	78.7877449	-1.41E-05	-0.226297483	0	0.06666667	528.859	989.3506	639.5923	0.8477	3.6781	1911	0.912793571	0.002108553	81.83870191	0.189047401
116.3628195	×ÔÉí³µÁ¾	Road 1	512.3578083	78.75868607	-1.46E-05	-0.175023139	0	0.06666667	529.4067	989.3594	639.5643	0.8479	3.677	1912	0.912567558	0.002108031	81.85384906	0.189082391
116.3796294	×ÔÉí³µÁ¾	Road 1	512.7254918	78.74292068	-1.50E-05	-0.171072543	0	0.06666667	529.7352	989.3643	639.5475	0.849	3.6759	1913	0.912444939	0.002107748	81.86918717	0.189117822
116.3962457	×ÔÉí³µÁ¾	Road 1	513.0888682	78.72694931	-1.58E-05	-0.198630199	0	0.06666667	530.0417	989.3691	639.5319	0.8497	3.6752	1914	0.912320717	0.002107461	81.88434662	0.189152841
116.4128221	×ÔÉí³µÁ¾	Road 1	513.4512537	78.70150909	-1.69E-05	-0.199304432	0	0.06666667	530.5014	989.376	639.5083	0.8511	3.6737	1915	0.912122849	0.002107004	81.89946633	0.189187767
116.4294792	×ÔÉí³µÁ¾	Road 1	513.8153276	78.68537979	-1.80E-05	-0.181125835	0	0.06666667	530.8078	989.3809	639.4927	0.8518	3.673	1916	0.911997398	0.002106714	81.91465751	0.189222859
116.4462341	×ÔÉí³µÁ¾	Road 1	514.1814685	78.6698822	-1.93E-05	-0.176142067	0	0.06666667	531.1141	989.3857	639.4771	0.8524	3.6723	1917	0.911876862	0.002106436	81.92993593	0.189258152
116.4628545	×ÔÉí³µÁ¾	Road 1	514.5445921	78.65310059	-2.07E-05	-0.188017949	0	0.06666667	531.4423	989.3906	639.4603	0.8535	3.6712	1918	0.911746338	0.002106134	81.94508951	0.189293157
116.4796164	×ÔÉí³µÁ¾	Road 1	514.9106765	78.62505798	-2.23E-05	-0.194405288	0	0.06666667	531.9672	989.3994	639.4335	0.8542	3.6705	1919	0.911528229	0.00210563	81.96036844	0.189328451
116.4962122	×ÔÉí³µÁ¾	Road 1	515.2730968	78.61692123	-2.45E-05	-0.19032976	0	0.06666667	532.1202	989.4014	639.4256	0.855	3.6697	1920	0.911464943	0.002105484	81.97549495	0.189363393
116.5128146	×ÔÉí³µÁ¾	Road 1	515.635561	78.5952095	-2.69E-05	-0.182938591	0	0.06666667	532.5356	989.4082	639.4044	0.8557	3.6689	1921	0.911296074	0.002105094	81.99062468	0.189398343
116.5299328	×ÔÉí³µÁ¾	Road 1	516.0091502	78.56685791	-2.91E-05	-0.189600885	0	0.06666667	533.0819	989.417	639.3765	0.8567	3.6678	1922	0.911075562	0.002104585	82.00622063	0.18943437
116.5462002	×ÔÉí³µÁ¾	Road 1	516.3640984	78.55058441	-3.17E-05	-0.19028981	0	0.06666667	533.3878	989.4219	639.3608	0.8574	3.6671	1923	0.91094899	0.002104292	82.0210394	0.189468601
116.5628602	×ÔÉí³µÁ¾	Road 1	516.727538	78.53447571	-3.38E-05	-0.187758088	0	0.06666667	533.6936	989.4268	639.3452	0.858	3.6665	1924	0.9108237	0.002104003	82.0362137	0.189503654
116.5795616	×ÔÉí³µÁ¾	Road 1	517.0917701	78.51053925	-3.59E-05	-0.18614991	0	0.06666667	534.1522	989.4336	639.3218	0.8595	3.665	1925	0.910637527	0.002103573	82.05142262	0.189538786
116.5966493	×ÔÉí³µÁ¾	Road 1	517.4643526	78.49465714	-3.75E-05	-0.18744348	0	0.06666667	534.4578	989.4385	639.3062	0.8601	3.6643	1926	0.910514	0.002103287	82.06698125	0.189574727
116.6128188	×ÔÉí³µÁ¾	Road 1	517.8168368	78.4774498	-3.86E-05	-0.188162386	0	0.06666667	534.7852	989.4434	639.2894	0.8612	3.6632	1927	0.910380165	0.002102978	82.08170167	0.189608731
116.6294674	×ÔÉí³µÁ¾	Road 1	518.1796534	78.45337601	-3.93E-05	-0.187373355	0	0.06666667	535.2435	989.4502	639.2661	0.8626	3.6617	1928	0.910192924	0.002102546	82.09685512	0.189643735
116.6462341	×ÔÉí³µÁ¾	Road 1	518.5449679	78.43739777	-4.00E-05	-0.186524242	0	0.06666667	535.5489	989.4551	639.2505	0.8632	3.6611	1929	0.910068649	0.002102259	82.11211392	0.189678983
116.662805	×ÔÉí³µÁ¾	Road 1	518.9059439	78.42141953	-4.07E-05	-0.186584398	0	0.06666667	535.8542	989.46	639.2349	0.8639	3.6604	1930	0.909944374	0.002101972	82.12719252	0.189713815
116.6795108	×ÔÉí³µÁ¾	Road 1	519.2697412	78.39615097	-4.11E-05	-0.187493414	0	0.06666667	536.334	989.4678	639.2104	0.8647	3.6595	1931	0.909747841	0.002101518	82.14239058	0.189748922
116.696188	×ÔÉí³µÁ¾	Road 1	519.6328426	78.38033066	-4.12E-05	-0.187003955	0	0.06666667	536.6392	989.4727	639.1948	0.8654	3.6589	1932	0.909624794	0.002101233	82.15756058	0.189783965
116.7128692	×ÔÉí³µÁ¾	Road 1	519.9959567	78.36415329	-4.21E-05	-0.186923832	0	0.06666667	536.9443	989.4775	639.1792	0.866	3.6583	1933	0.90949897	0.002100943	82.17273215	0.189819011
116.729549	×ÔÉí³µÁ¾	Road 1	520.3589226	78.33902893	-4.25E-05	-0.186894104	0	0.06666667	537.4237	989.4844	639.1547	0.8678	3.6564	1934	0.909303558	0.002100491	82.18789912	0.189854047
116.7461727	×ÔÉí³µÁ¾	Road 1	520.7205947	78.32315369	-4.37E-05	-0.186250001	0	0.06666667	537.7287	989.4893	639.1392	0.8684	3.6558	1935	0.909180084	0.002100206	82.20301305	0.18988896
116.7628807	×ÔÉí³µÁ¾	Road 1	521.0840215	78.30601501	-4.57E-05	-0.187403768	0	0.06666667	538.0554	989.4951	639.1225	0.8685	3.6558	1936	0.909046783	0.002099898	82.2182014	0.189924045
116.7794945	×ÔÉí³µÁ¾	Road 1	521.445325	78.28993378	-4.80E-05	-0.186649591	0	0.06666667	538.3602	989.499	639.1069	0.8701	3.6542	1937	0.908921707	0.002099609	82.23330203	0.189958928
116.7961479	×ÔÉí³µÁ¾	Road 1	521.8073734	78.26485062	-5.13E-05	-0.186559722	0	0.06666667	538.8392	989.5068	639.0824	0.8709	3.6533	1938	0.908726616	0.002099158	82.2484354	0.189993886
116.8295924	×ÔÉí³µÁ¾	Road 1	522.5341707	78.23299713	-5.50E-05	-0.186284825	0	0.06666667	539.4485	989.5166	639.0513	0.8722	3.6521	1939	0.908478867	0.002098586	82.2788191	0.190064072
116.8461505	×ÔÉí³µÁ¾	Road 1	522.8938849	78.20784531	-5.94E-05	-0.18550092	0	0.06666667	539.9271	989.5244	639.0269	0.873	3.6513	1940	0.908283241	0.002098134	82.29385852	0.190098813
117.080664	×ÔÉí³µÁ¾	Road 1	527.9712189	77.9418045	-7.08E-05	-0.184971288	0	0.06666667	545.0079	989.6035	638.7673	0.8862	3.6386	1941	0.906214035	0.002093354	82.50637791	0.190589733
117.1152082	×ÔÉí³µÁ¾	Road 1	528.7187283	77.90105896	-7.71E-05	-0.18506138	0	0.06666667	545.788	989.6152	638.7274	0.8887	3.6362	1942	0.905897125	0.002092622	82.53767145	0.190662021
117.132517	×ÔÉí³µÁ¾	Road 1	529.0932038	77.88601456	-0.000227896	-0.206127942	0	0.074509807	546.0696	989.6201	638.713	0.8889	3.636	1943	0.905780113	0.002092352	82.5533494	0.190698237
117.196212	×ÔÉí³µÁ¾	Road 1	530.4695927	77.79261017	-0.000274475	-0.224207312	0	0.074509807	547.5416	989.6436	638.6378	0.8922	3.6325	1944	0.905053635	0.002090674	82.61099678	0.190831403
117.2294847	×ÔÉí³µÁ¾	Road 1	531.1882948	77.7613472	-0.000298335	-0.265340149	0	0.074509807	548.0391	989.6514	638.6124	0.8934	3.6312	1945	0.904810478	0.002090112	82.64110224	0.190900946
117.2461754	×ÔÉí³µÁ¾	Road 1	531.548647	77.72367783	-0.000381972	-0.252532423	0	0.074509807	548.6229	989.6602	638.5826	0.8952	3.6293	1946	0.904517494	0.002089435	82.65619934	0.19093582
117.2627881	×ÔÉí³µÁ¾	Road 1	531.9072287	77.70530319	-0.000414165	-0.234795049	0	0.074509807	548.9254	989.665	638.5671	0.8959	3.6288	1947	0.90437458	0.002089105	82.67122343	0.190970526
117.2794433	×ÔÉí³µÁ¾	Road 1	532.266636	77.68536987	-0.000422358	-0.244878337	0	0.074509807	549.2495	989.6699	638.5505	0.8969	3.6279	1948	0.904219543	0.002088747	82.6862834	0.191005315
117.2961744	×ÔÉí³µÁ¾	Road 1	532.6275975	77.66747589	-0.000426494	-0.254267126	0	0.074509807	549.5303	989.6738	638.5363	0.8981	3.6267	1949	0.904080368	0.002088426	82.70140965	0.191040256
117.3128656	×ÔÉí³µÁ¾	Road 1	532.9875883	77.64402008	-0.000427013	-0.250371248	0	0.074509807	549.8975	989.6797	638.5175	0.8989	3.626	1950	0.903897934	0.002088004	82.71649673	0.191075107
117.3294607	×ÔÉí³µÁ¾	Road 1	533.3454018	77.62103806	-0.000427013	-0.242101446	0	0.074509807	550.2645	989.6855	638.4988	0.8997	3.6253	1951	0.903719185	0.002087591	82.73149404	0.191109751
117.3461584	×ÔÉí³µÁ¾	Road 1	533.7052787	77.58880005	-0.000427013	-0.246185288	0	0.074509807	550.7825	989.6943	638.4723	0.9004	3.6246	1952	0.903468445	0.002087012	82.74657991	0.1911446
117.3628976	×ÔÉí³µÁ¾	Road 1	534.0659616	77.57013016	-0.00042494	-0.224390134	0	0.06666667	551.0845	989.6982	638.4568	0.903	3.623	1953	0.903323235	0.002086677	82.76170078	0.191179529
117.3794432	×ÔÉí³µÁ¾	Road 1	534.4223666	77.54672241	-0.000423906	-0.195289299	0	0.074509807	551.5159	989.7051	638.4348	0.9041	3.6219	1954	0.903141174	0.002086256	82.7766438	0.191214047
117.3961537	×ÔÉí³µÁ¾	Road 1	534.7822484	77.53027725	-0.000420814	-0.22278665	0	0.074509807	551.6669	989.708	638.4271	0.9039	3.622	1955	0.903013268	0.002085961	82.79173366	0.191248905
117.4128566	×ÔÉí³µÁ¾	Road 1	535.1418626	77.50833893	-0.000417736	-0.288568109	0	0.074509807	552.1196	989.7148	638.4039	0.9054	3.6206	1956	0.902842636	0.002085566	82.80681372	0.19128374
117.4294612	×ÔÉí³µÁ¾	Road 1	535.4992226	77.47815399	-0.000414674	-0.239556238	0	0.074509807	552.5722	989.7217	638.3808	0.9067	3.6191	1957	0.902607864	0.002085024	82.82180118	0.191318361
117.4461615	×ÔÉí³µÁ¾	Road 1	535.8585589	77.46032867	-0.000410615	-0.216713458	0	0.074509807	552.8738	989.7266	638.3654	0.9072	3.6184	1958	0.902469223	0.002084704	82.83687269	0.191353176
117.4628248	×ÔÉí³µÁ¾	Road 1	536.2170159	77.44248276	-0.000408595	-0.235565364	0	0.074509807	553.1754	989.7314	638.35	0.9078	3.6179	1959	0.902330421	0.002084383	82.85190847	0.191387909
117.4795046	×ÔÉí³µÁ¾	Road 1	536.5757325	77.42189713	-0.000407587	-0.262154102	0	0.074509807	553.4984	989.7363	638.3336	0.9087	3.617	1960	0.902170311	0.002084013	82.86695646	0.191422669
117.4961462	×ÔÉí³µÁ¾	Road 1	536.9334783	77.38926086	-0.000407587	-0.204941556	0	0.06666667	554.015	989.7451	638.3071	0.9091	3.6164	1961	0.901916473	0.002083427	82.88196584	0.191457341
117.5127758	×ÔÉí³µÁ¾	Road 1	537.2908955	77.37441559	-0.000407587	-0.134615093	0	0.06666667	554.3163	989.75	638.2917	0.9097	3.6158	1962	0.90180101	0.00208316	82.89696239	0.191491983
117.52942	×ÔÉí³µÁ¾	Road 1	537.6485715	77.36224136	-0.000407587	-0.137951061	0	0.06666667	554.596	989.7539	638.2775	0.9108	3.6147	1963	0.901706322	0.002082942	82.91197058	0.191526652
117.5628657	×ÔÉí³µÁ¾	Road 1	538.3670045	77.33012009	-0.000407587	-0.220223263	0	0.06666667	555.1983	989.7637	638.2467	0.9118	3.6135	1964	0.90145649	0.002082364	82.94212041	0.191596298
117.5794373	×ÔÉí³µÁ¾	Road 1	538.7228287	77.29877472	-0.000406079	-0.163460746	0	0.06666667	555.7789	989.7725	638.217	0.9135	3.6117	1965	0.901212692	0.002081801	82.95705498	0.191630797
117.5961863	×ÔÉí³µÁ¾	Road 1	539.0823893	77.28306427	-0.000404575	-0.162401825	0	0.06666667	556.1013	989.7773	638.2006	0.9144	3.6108	1966	0.9010905	0.002081519	82.97214739	0.19166566
117.6128174	×ÔÉí³µÁ¾	Road 1	539.439345	77.26769714	-0.000402076	-0.186543107	0	0.06666667	556.4022	989.7822	638.1852	0.9149	3.6102	1967	0.900970978	0.002081243	82.98713146	0.191700274
117.6294565	×ÔÉí³µÁ¾	Road 1	539.7963494	77.24080124	-0.000396615	-0.192621157	0	0.06666667	556.8963	989.79	638.16	0.9162	3.609	1968	0.900761787	0.00208076	83.00211931	0.191734896
117.6461282	×ÔÉí³µÁ¾	Road 1	540.153981	77.22507019	-0.000389248	-0.1847305	0	0.06666667	557.197	989.7949	638.1447	0.917	3.6084	1969	0.900639435	0.002080477	83.0171345	0.191769581
117.6627834	×ÔÉí³µÁ¾	Road 1	540.511178	77.20761566	-0.000380528	-0.172464922	0	0.06666667	557.4762	989.7998	638.1304	0.9173	3.6082	1970	0.900503677	0.002080163	83.03213258	0.191804226
117.6794859	×ÔÉí³µÁ¾	Road 1	540.869296	77.18753128	-0.000370993	-0.184625223	0	0.06666667	557.927	989.8066	638.1073	0.9189	3.6069	1971	0.900347466	0.002079803	83.04717063	0.191838964
117.6960861	×ÔÉí³µÁ¾	Road 1	541.2251422	77.17042007	-0.000363015	-0.187831372	0	0.06666667	558.249	989.8115	638.0909	0.9199	3.6059	1972	0.900214378	0.002079495	83.0621144	0.191873484
117.7128231	×ÔÉí³µÁ¾	Road 1	541.5838252	77.15016403	-0.000354235	-0.183067247	0	0.06666667	558.528	989.8164	638.0766	0.92	3.6057	1973	0.900056831	0.002079131	83.07717861	0.191908283
117.7294794	×ÔÉí³µÁ¾	Road 1	541.9406978	77.13239365	-0.000345147	-0.17867133	0	0.06666667	558.9785	989.8232	638.0536	0.9213	3.6044	1974	0.899918617	0.002078812	83.09216793	0.191942908
117.7461261	×ÔÉí³µÁ¾	Road 1	542.2972832	77.1144722	-0.000334007	-0.181876957	0	0.06666667	559.3217	989.8291	638.0361	0.9217	3.604	1975	0.899779228	0.00207849	83.10714636	0.191977508
117.7627814	×ÔÉí³µÁ¾	Road 1	542.6539455	77.09203949	-0.000324836	-0.183484301	0	0.06666667	559.7505	989.8359	638.0142	0.9226	3.6031	1976	0.899604752	0.002078087	83.12212947	0.192012119
117.814306	×ÔÉí³µÁ¾	Road 1	543.7564838	77.03383942	-0.000316685	-0.182026163	0	0.06666667	560.8649	989.8535	637.9573	0.9252	3.6004	1977	0.899152084	0.002077041	83.16845792	0.192119138
117.8960934	×ÔÉí³µÁ¾	Road 1	545.5045352	76.94314041	-0.00030617	-0.181397483	0	0.06666667	562.5992	989.8809	637.8687	0.9292	3.5962	1978	0.898446648	0.002075412	83.2419396	0.19228888
117.912826	×ÔÉí³µÁ¾	Road 1	545.8620837	76.92637253	-0.00024865	-0.180808112	0	0.06666667	562.9202	989.8857	637.8522	0.9301	3.5953	1979	0.898316231	0.00207511	83.25697073	0.192323602
117.9294163	×ÔÉí³µÁ¾	Road 1	546.2165212	76.91074448	-0.000214176	-0.180707142	0	0.06666667	563.2196	989.8906	637.837	0.9306	3.5947	1980	0.898194679	0.00207483	83.27187207	0.192358024
117.9461723	×ÔÉí³µÁ¾	Road 1	546.5743895	76.88737793	-0.000201962	-0.181306794	0	0.06666667	563.6687	989.8984	637.814	0.9309	3.5944	1981	0.898012939	0.00207441	83.28691919	0.192392783
117.9627696	×ÔÉí³µÁ¾	Road 1	546.9287958	76.87172241	-0.000190827	-0.181766286	0	0.06666667	563.9681	989.9023	637.7987	0.9324	3.5928	1982	0.897891174	0.002074129	83.30182176	0.192427208
117.9794153	×ÔÉí³µÁ¾	Road 1	547.2841631	76.85609436	-0.000181574	-0.180872336	0	0.06666667	564.2673	989.9072	637.7834	0.9329	3.5923	1983	0.897769623	0.002073848	83.31676574	0.192461729
117.9961603	×ÔÉí³µÁ¾	Road 1	547.6415368	76.83153992	-0.000172624	-0.180661872	0	0.06666667	564.7375	989.915	637.7594	0.9336	3.5916	1984	0.897578644	0.002073407	83.33179571	0.192496448
118.0128141	×ÔÉí³µÁ¾	Road 1	547.99689	76.81582947	-0.000164523	-0.180880159	0	0.06666667	565.0366	989.9199	637.7441	0.9341	3.5911	1985	0.897456451	0.002073124	83.34674173	0.192530973
118.0294784	×ÔÉí³µÁ¾	Road 1	548.3523976	76.80020828	-0.000157212	-0.180830449	0	0.06666667	565.3356	989.9248	637.7289	0.9347	3.5906	1986	0.897334953	0.002072844	83.36169525	0.192565516
118.0461725	×ÔÉí³µÁ¾	Road 1	548.7084201	76.7746376	-0.000150898	-0.18089956	0	0.06666667	565.8268	989.9326	637.7038	0.9357	3.5895	1987	0.89713607	0.002072384	83.3766721	0.192600113
118.0627925	×ÔÉí³µÁ¾	Road 1	549.0627914	76.75903702	-0.000146021	-0.180909321	0	0.06666667	566.1257	989.9375	637.6885	0.9362	3.589	1988	0.897014732	0.002072104	83.39158051	0.192634551
118.0794041	×ÔÉí³µÁ¾	Road 1	549.416911	76.74342957	-0.000142996	-0.180399895	0	0.06666667	566.4245	989.9424	637.6732	0.9367	3.5885	1989	0.896893341	0.002071824	83.40647933	0.192668967
118.0961268	×ÔÉí³µÁ¾	Road 1	549.7733258	76.72782211	-0.000140012	-0.180730969	0	0.06666667	566.7233	989.9463	637.658	0.9382	3.587	1990	0.89677195	0.002071543	83.42147574	0.192703609
118.1127343	×ÔÉí³µÁ¾	Road 1	550.1272001	76.70888443	-0.000138047	-0.180681273	0	0.06666667	567.0859	989.9521	637.6395	0.9389	3.5863	1991	0.896624657	0.002071203	83.43636649	0.192738007
118.1293892	×ÔÉí³µÁ¾	Road 1	550.4819943	76.68994675	-0.000136099	-0.180203021	0	0.06666667	567.4485	989.958	637.621	0.9396	3.5856	1992	0.896477364	0.002070863	83.45129718	0.192772496
118.1460899	×ÔÉí³µÁ¾	Road 1	550.837682	76.67213516	-0.000134892	-0.180592462	0	0.06666667	567.7898	989.9639	637.6035	0.9399	3.5853	1993	0.896338829	0.002070543	83.46626664	0.192807076
118.1627465	×ÔÉí³µÁ¾	Road 1	551.1923087	76.64530792	-0.000133931	-0.179408759	0	0.06666667	568.3015	989.9717	637.5773	0.9414	3.5839	1994	0.896130173	0.002070061	83.48119319	0.192841556
118.1794593	×ÔÉí³µÁ¾	Road 1	551.5480572	76.62974854	-0.000133213	-0.180607364	0	0.06666667	568.5998	989.9766	637.5621	0.9419	3.5834	1995	0.896009155	0.002069781	83.49616798	0.192876148
118.1961061	×ÔÉí³µÁ¾	Road 1	551.9023296	76.61425781	-0.000132498	-0.179878473	0	0.06666667	568.8981	989.9814	637.5469	0.9425	3.5829	1996	0.895888672	0.002069503	83.51108164	0.192910599
118.21274	×ÔÉí³µÁ¾	Road 1	552.2562516	76.59748993	-0.000132023	-0.179239228	0	0.06666667	569.2177	989.9863	637.5306	0.9434	3.582	1997	0.895758255	0.002069202	83.52598164	0.192945018
[truncated: 3,057 more rows]
