# Supplementary material for: Influence of Landscape Design on Driving Behavior Based on Slope Illusion
Source: Hindawi journal article supplement (doi:10.1155/2022/6407145), 2022-01-12
Supplement: f1 [file 6407145.f1.zip › 2.txt]

CO2 emission report
0.3	0.028	0.056	0.00231
Time(s)	Vehicle Name	Road Name	Travelled Distance (m)	Speed(km/h)	Steering Wheel Angle(-1..1)	Acceleration(m/s^2)	Accelerate (0..1)	Brake (0..1)	X Pos(m)	Y Pos(m)	Z Pos(m)	Distance to the left border(m)	Distance to the right border(m)	Measurement Point Number	Gasoline Consumption(cc/sec)	Carbon Dioxide Emission(kg/sec)	Progressive Gasoline Consumption(cc)	Progressive Carbon Dioxide Emission(kg)
0			0	0	0	0	0	0	0	10000	0	NAN	NAN	1	0	0	0	0
6.554864475	×ÔÉí³µÁ¾	Road 1	0.017101048	0.009392074	0	0.437641859	0	0	17.2786	977.0928	655.7373	3.8317	0.7021	2	0.300073108	0.000693169	1.966938553	0.004543628
6.569951926	×ÔÉí³µÁ¾	Road 1	0.017324782	0.053384874	0	0.494021088	0	0	17.2788	977.0928	655.7373	3.8317	0.7021	3	0.301206166	0.000695786	1.971482986	0.004554126
6.59942414	×ÔÉí³µÁ¾	Road 1	0.018039742	0.087331666	0	0.496591389	0	0	17.2794	977.0928	655.7373	3.8317	0.7021	4	0.301379595	0.000696187	1.98036531	0.004574644
6.666099238	×ÔÉí³µÁ¾	Road 1	0.021517603	0.187780742	0	0.572185516	0	0	17.2818	977.0928	655.7373	3.8317	0.7021	5	0.303251434	0.000700511	2.000584629	0.00462135
6.718564786	×ÔÉí³µÁ¾	Road 1	0.025859928	0.297954932	0	0.642655611	0	0	17.2859	977.0928	655.7373	3.8318	0.702	6	0.30672489	0.000708534	2.016677119	0.004658524
6.782757199	×ÔÉí³µÁ¾	Road 1	0.033597124	0.433912727	0	0.713427186	0	0	17.2925	977.0928	655.7373	3.8319	0.7019	7	0.310072736	0.000716268	2.036581436	0.004704503
6.833258739	×ÔÉí³µÁ¾	Road 1	0.040833736	0.515861589	0	0.743491828	0	0	17.2972	977.0928	655.7373	3.832	0.7018	8	0.310671759	0.000717652	2.052270838	0.004740746
6.849349088	×ÔÉí³µÁ¾	Road 1	0.043391223	0.57220332	0	0.755393863	0	0	17.3009	977.0928	655.7373	3.8321	0.7017	9	0.320913227	0.00074131	2.057434444	0.004752674
6.86601493	×ÔÉí³µÁ¾	Road 1	0.046216254	0.610237044	0	0.760734618	0	0	17.3035	977.0928	655.7373	3.8321	0.7017	10	0.316406431	0.000730899	2.062707623	0.004764855
6.88274272	×ÔÉí³µÁ¾	Road 1	0.049285647	0.660566336	0	0.766485691	0	0	17.3072	977.0938	655.7373	3.8312	0.7026	11	0.321659016	0.000743032	2.068088268	0.004777284
6.899383269	×ÔÉí³µÁ¾	Road 1	0.052495011	0.694310457	0	0.768926024	0	0	17.3098	977.0938	655.7373	3.8313	0.7025	12	0.317271902	0.000732898	2.073367847	0.00478948
6.916001092	×ÔÉí³µÁ¾	Road 1	0.055867455	0.73058905	0	0.770566285	0	0	17.3128	977.0938	655.7373	3.8313	0.7025	13	0.31912373	0.000737176	2.078670988	0.00480173
6.933397481	×ÔÉí³µÁ¾	Road 1	0.059702803	0.793685067	0	0.772596657	0	0	17.3183	977.0938	655.7373	3.8314	0.7024	14	0.33006161	0.000762442	2.084412868	0.004814994
6.949381895	×ÔÉí³µÁ¾	Road 1	0.063302356	0.810689092	0	0.773428261	0	0	17.3199	977.0938	655.7373	3.8314	0.7024	15	0.313680048	0.000724601	2.08942686	0.004826576
6.966054335	×ÔÉí³µÁ¾	Road 1	0.067248259	0.852019948	0	0.773435175	0	0	17.3238	977.0938	655.7373	3.8315	0.7023	16	0.324437257	0.00074945	2.094836021	0.004839071
6.982658595	×ÔÉí³µÁ¾	Road 1	0.071368833	0.893389159	0	0.774245381	0	0	17.3279	977.0938	655.7373	3.8316	0.7022	17	0.325739067	0.000752457	2.100244677	0.004851565
6.999347163	×ÔÉí³µÁ¾	Road 1	0.075690874	0.932335746	0	0.774245381	0	0	17.332	977.0938	655.7373	3.8317	0.7021	18	0.325662132	0.00075228	2.105679512	0.00486412
7.016072388	×ÔÉí³µÁ¾	Road 1	0.080214659	0.973716331	0	0.774248481	0	0	17.3365	977.0938	655.7373	3.8317	0.7021	19	0.327950453	0.000757566	2.111164557	0.00487679
7.042077347	×ÔÉí³µÁ¾	Road 1	0.087810538	1.051536548	0	0.772608221	0	0	17.3455	977.0938	655.7373	3.8319	0.7019	20	0.334366389	0.000772386	2.119859741	0.004896876
7.072835074	×ÔÉí³µÁ¾	Road 1	0.097375262	1.119491279	0	0.771776438	0	0	17.354	977.0938	655.7373	3.8321	0.7017	21	0.329433077	0.00076099	2.129992354	0.004920282
7.105345672	×ÔÉí³µÁ¾	Road 1	0.108206887	1.199419606	0	0.770127714	0	0	17.3646	977.0947	655.7373	3.8313	0.7025	22	0.333963268	0.000771455	2.140849699	0.004945363
7.137436929	×ÔÉí³µÁ¾	Road 1	0.11960908	1.279099023	0	0.767667413	0	0	17.376	977.0947	655.7373	3.8315	0.7023	23	0.336539545	0.000777406	2.151649676	0.004970311
7.167893713	×ÔÉí³µÁ¾	Road 1	0.131000888	1.346514738	0	0.766437232	0	0	17.3862	977.0947	655.7373	3.8317	0.7021	24	0.335585451	0.000775202	2.16187053	0.004993921
7.199495985	×ÔÉí³µÁ¾	Road 1	0.143580303	1.432994843	0	0.764786959	0	0	17.4001	977.0947	655.7373	3.8319	0.7019	25	0.344011686	0.000794667	2.172742081	0.005019034
7.229491642	×ÔÉí³µÁ¾	Road 1	0.156079	1.500060904	0	0.762735009	0	0	17.4115	977.0947	655.7373	3.8321	0.7017	26	0.340003743	0.000785409	2.182940716	0.005042593
7.249457955	×ÔÉí³µÁ¾	Road 1	0.164676998	1.550250614	0	0.76191479	0	0	17.4204	977.0957	655.7373	3.8313	0.7025	27	0.345189227	0.000797387	2.189832873	0.005058514
7.266114267	×ÔÉí³µÁ¾	Road 1	0.172004191	1.583657634	0	0.760673106	0	0	17.4265	977.0957	655.7373	3.8314	0.7024	28	0.33947724	0.000784192	2.195487311	0.005071576
7.282680039	×ÔÉí³µÁ¾	Road 1	0.179456051	1.619405258	0	0.759853065	0	0	17.4332	977.0957	655.7373	3.8316	0.7023	29	0.34246185	0.000791087	2.201160456	0.005084681
7.299350646	×ÔÉí³µÁ¾	Road 1	0.187120374	1.655102456	0	0.758604288	0	0	17.44	977.0957	655.7373	3.8317	0.7021	30	0.343170865	0.000792725	2.206881323	0.005097896
7.316053876	×ÔÉí³µÁ¾	Road 1	0.194987135	1.6955006	0	0.757794201	0	0	17.4479	977.0957	655.7373	3.8318	0.702	31	0.34820326	0.00080435	2.212697442	0.005111331
7.332786065	×ÔÉí³µÁ¾	Road 1	0.203132114	1.752426195	0	0.756145477	0	0	17.4594	977.0957	655.7373	3.832	0.7018	32	0.3643169	0.000841572	2.218793261	0.005125412
7.349363933	×ÔÉí³µÁ¾	Road 1	0.211354614	1.785573363	0	0.755323708	0	0	17.4663	977.0957	655.7373	3.8322	0.7017	33	0.344455196	0.000795692	2.224503594	0.005138603
7.366651455	×ÔÉí³µÁ¾	Road 1	0.220167497	1.835218477	0	0.754063547	0	0	17.4769	977.0967	655.7373	3.8314	0.7024	34	0.359203296	0.00082976	2.230713329	0.005152948
7.432713304	×ÔÉí³µÁ¾	Road 1	0.256093017	1.95773921	0	0.751193106	0	0	17.5043	977.0967	655.7373	3.8319	0.702	35	0.345623102	0.000798389	2.25354583	0.005205691
7.449351654	×ÔÉí³µÁ¾	Road 1	0.265379968	2.009395337	0	0.749551296	0	0	17.5164	977.0967	655.7373	3.8321	0.7017	36	0.368848222	0.000852039	2.259682856	0.005219867
7.465994403	×ÔÉí³µÁ¾	Road 1	0.2748536	2.049245238	0	0.749142706	0	0	17.526	977.0977	655.7373	3.8313	0.7025	37	0.357930501	0.000826819	2.265639803	0.005233628
7.482660245	×ÔÉí³µÁ¾	Road 1	0.28452469	2.089058876	0	0.748302698	0	0	17.5358	977.0977	655.7373	3.8315	0.7024	38	0.358966149	0.000829212	2.271622276	0.005247447
7.499373006	×ÔÉí³µÁ¾	Road 1	0.29439669	2.126470971	0	0.747474194	0	0	17.5451	977.0977	655.7373	3.8316	0.7022	39	0.357314693	0.000825397	2.277593991	0.005261242
7.516031516	×ÔÉí³µÁ¾	Road 1	0.304495815	2.182478929	0	0.74582392	0	0	17.5595	977.0977	655.7373	3.8319	0.7019	40	0.379573928	0.000876816	2.283917128	0.005275849
7.532737313	×ÔÉí³µÁ¾	Road 1	0.314753349	2.210437632	0	0.744982123	0	0	17.5638	977.0977	655.7373	3.832	0.7019	41	0.348959996	0.000806098	2.289746783	0.005289315
7.549426981	×ÔÉí³µÁ¾	Road 1	0.325184356	2.24999249	0	0.744173646	0	0	17.5774	977.0986	655.7373	3.8312	0.7026	42	0.363178448	0.000838942	2.29580811	0.005303317
7.583482247	×ÔÉí³µÁ¾	Road 1	0.347259121	2.333534932	0	0.741691589	0	0	17.6003	977.0986	655.7373	3.8317	0.7022	43	0.366735113	0.000847158	2.308297372	0.005332167
7.599309775	×ÔÉí³µÁ¾	Road 1	0.35765092	2.363633609	0	0.740863085	0	0	17.6088	977.0986	655.7373	3.8318	0.702	44	0.356980811	0.000824626	2.313947496	0.005345219
7.616034999	×ÔÉí³µÁ¾	Road 1	0.368793248	2.398316503	0	0.740041316	0	0	17.6187	977.0986	655.7373	3.832	0.7018	45	0.361322453	0.000834655	2.319990695	0.005359179
7.632685812	×ÔÉí³µÁ¾	Road 1	0.380067543	2.437566447	0	0.739209771	0	0	17.6301	977.0996	655.7373	3.8312	0.7026	46	0.368215221	0.000850577	2.326121778	0.005373341
7.6493106	×ÔÉí³µÁ¾	Road 1	0.391505148	2.476746011	0	0.737559497	0	0	17.6417	977.0996	655.7373	3.8314	0.7024	47	0.369307265	0.0008531	2.332261432	0.005387524
7.666024094	×ÔÉí³µÁ¾	Road 1	0.403174709	2.51356287	0	0.736732304	0	0	17.6528	977.0996	655.7373	3.8316	0.7022	48	0.367049532	0.000847884	2.338396113	0.005401695
7.682754083	×ÔÉí³µÁ¾	Road 1	0.415037282	2.55261755	0	0.73590225	0	0	17.6648	977.0996	655.7373	3.8318	0.702	49	0.370956069	0.000856909	2.344602204	0.005416031
7.699373006	×ÔÉí³µÁ¾	Road 1	0.426990541	2.589321327	0	0.73508203	0	0	17.6762	977.0996	655.7373	3.8321	0.7018	50	0.369209366	0.000852874	2.350738066	0.005430205
7.715969935	×ÔÉí³µÁ¾	Road 1	0.439107463	2.628252411	0	0.73384881	0	0	17.6885	977.1006	655.7373	3.8313	0.7025	51	0.373325485	0.000862382	2.356934122	0.005444518
7.732672433	×ÔÉí³µÁ¾	Road 1	0.451545325	2.68081491	0	0.732188523	0	0	17.7055	977.1006	655.7373	3.8316	0.7022	52	0.393043909	0.000907931	2.363498937	0.005459683
7.749373464	×ÔÉí³µÁ¾	Road 1	0.464077345	2.701346469	0	0.731351376	0	0	17.7122	977.1006	655.7373	3.8317	0.7021	53	0.349600751	0.000807578	2.36933763	0.00547317
7.766021345	×ÔÉí³µÁ¾	Road 1	0.476738051	2.737798333	0	0.73053962	0	0	17.7243	977.1006	655.7373	3.832	0.7019	54	0.372754539	0.000861063	2.375543203	0.005487505
7.782893558	×ÔÉí³µÁ¾	Road 1	0.489771841	2.78100121	0	0.729288101	0	0	17.7389	977.1016	655.7373	3.8312	0.7026	55	0.382691621	0.000884018	2.382000058	0.00550242
7.799349729	×ÔÉí³µÁ¾	Road 1	0.502650218	2.817311239	0	0.728057742	0	0	17.7513	977.1016	655.7373	3.8315	0.7024	56	0.375287427	0.000866914	2.388175852	0.005516686
7.816037198	×ÔÉí³µÁ¾	Road 1	0.515888119	2.855822182	0	0.726807594	0	0	17.7647	977.1016	655.7373	3.8317	0.7021	57	0.378783712	0.00087499	2.394496794	0.005531288
7.832778551	×ÔÉí³µÁ¾	Road 1	0.529347535	2.894264245	0	0.72557056	0	0	17.7783	977.1016	655.7373	3.832	0.7019	58	0.379563295	0.000876791	2.400851197	0.005545966
7.84934359	×ÔÉí³µÁ¾	Road 1	0.542831381	2.930379224	0	0.724740326	0	0	17.7913	977.1025	655.7373	3.8312	0.7026	59	0.377663394	0.000872402	2.407107205	0.005560418
7.866041322	×ÔÉí³µÁ¾	Road 1	0.556600907	2.968684173	0	0.723490119	0	0	17.8052	977.1025	655.7373	3.8315	0.7024	60	0.381563857	0.000881413	2.413478457	0.005575135
7.882688469	×ÔÉí³µÁ¾	Road 1	0.570505518	3.006917453	0	0.72225827	0	0	17.8193	977.1025	655.7373	3.8317	0.7021	61	0.382688733	0.000884011	2.419849132	0.005589851
7.899293096	×ÔÉí³µÁ¾	Road 1	0.584540302	3.042839956	0	0.721429765	0	0	17.8328	977.1025	655.7373	3.832	0.7019	62	0.380219899	0.000878308	2.426162542	0.005604435
7.916038481	×ÔÉí³µÁ¾	Road 1	0.598871269	3.080937409	0	0.720179617	0	0	17.8472	977.1035	655.7373	3.8313	0.7026	63	0.384163781	0.000887418	2.432595512	0.005619296
7.932705789	×ÔÉí³µÁ¾	Road 1	0.613311463	3.118961906	0	0.718946338	0	0	17.8619	977.1035	655.7373	3.8315	0.7023	64	0.385376106	0.000890219	2.439018695	0.005634133
7.949365766	×ÔÉí³µÁ¾	Road 1	0.627910648	3.154690218	0	0.718117654	0	0	17.8758	977.1035	655.7373	3.8318	0.7021	65	0.382671998	0.000883972	2.445394001	0.00564886
7.965985422	×ÔÉí³µÁ¾	Road 1	0.642649429	3.192581677	0	0.716445863	0	0	17.8908	977.1035	655.7373	3.832	0.7018	66	0.387361336	0.000894805	2.451831813	0.005663731
7.982653463	×ÔÉí³µÁ¾	Road 1	0.657606225	3.230401683	0	0.715625823	0	0	17.906	977.1045	655.7373	3.8313	0.7025	67	0.388098703	0.000896508	2.458300659	0.005678675
7.999359993	×ÔÉí³µÁ¾	Road 1	0.672762469	3.265937304	0	0.714798689	0	0	17.9204	977.1045	655.7373	3.8316	0.7022	68	0.385109302	0.000889602	2.464734498	0.005693537
8.016028401	×ÔÉí³µÁ¾	Road 1	0.68805861	3.303621268	0	0.713146865	0	0	17.9359	977.1045	655.7373	3.8319	0.702	69	0.389872167	0.000900605	2.471233047	0.005708548
8.032683979	×ÔÉí³µÁ¾	Road 1	0.703517013	3.341237855	0	0.712308347	0	0	17.9516	977.1045	655.7373	3.8322	0.7017	70	0.390834194	0.000902827	2.477742616	0.005723585
8.049357885	×ÔÉí³µÁ¾	Road 1	0.719156121	3.376580787	0	0.711485028	0	0	17.9665	977.1055	655.7373	3.8315	0.7024	71	0.387790822	0.000895797	2.484208604	0.005738522
8.066016396	×ÔÉí³µÁ¾	Road 1	0.734954226	3.414061332	0	0.70982784	0	0	17.9826	977.1055	655.7373	3.8318	0.7021	72	0.392571997	0.000906841	2.490748269	0.005753629
8.082706431	×ÔÉí³µÁ¾	Road 1	0.750955674	3.451473427	0	0.708996117	0	0	17.9988	977.1055	655.7373	3.8321	0.7018	73	0.393343345	0.000908623	2.497313183	0.005768793
8.099310691	×ÔÉí³µÁ¾	Road 1	0.767092909	3.498743391	0.054606039	0.603967667	0	0.011764706	18.021	977.1064	655.7373	3.8315	0.7024	74	0.412708708	0.000953357	2.504165906	0.005784623
8.116178872	×ÔÉí³µÁ¾	Road 1	0.783604188	3.523830199	-1.73E-06	0.593406498	0	0.011764706	18.0347	977.1064	655.7373	3.8317	0.7021	75	0.372536649	0.00086056	2.510449921	0.005799139
8.132778734	×ÔÉí³µÁ¾	Road 1	0.799977051	3.55077095	-2.17E-06	0.600374222	0	0.011764706	18.0494	977.1064	655.7373	3.832	0.7019	76	0.377229505	0.0008714	2.516711879	0.005813604
8.149307117	×ÔÉí³µÁ¾	Road 1	0.816396304	3.576230693	-3.02E-06	0.605282724	0	0.011764706	18.0633	977.1064	655.7373	3.8322	0.7016	77	0.375251723	0.000866831	2.522914183	0.005827932
8.165972593	×ÔÉí³µÁ¾	Road 1	0.833095631	3.607312346	-4.77E-06	0.606500208	0	0.011764706	18.0802	977.1074	655.7373	3.8316	0.7023	78	0.385947483	0.000891539	2.529346182	0.00584279
8.182714678	×ÔÉí³µÁ¾	Road 1	0.850016355	3.638412237	-7.19E-06	0.606068432	0	0.011764706	18.0973	977.1074	655.7373	3.8319	0.702	79	0.386457392	0.000892717	2.535816284	0.005857736
8.199315273	×ÔÉí³µÁ¾	Road 1	0.866932895	3.668515635	-1.06E-05	0.669707775	0	0	18.1136	977.1074	655.7373	3.8322	0.7017	80	0.38578741	0.000891169	2.542220585	0.00587253
8.215990279	×ÔÉí³µÁ¾	Road 1	0.884107755	3.707914495	-1.58E-05	0.71752578	0	0	18.132	977.1074	655.7373	3.8325	0.7013	81	0.404148344	0.000933583	2.548959761	0.005888097
8.232749959	×ÔÉí³µÁ¾	Road 1	0.901534957	3.743384457	-2.18E-05	0.709694028	0.011764706	0	18.1486	977.1084	655.7373	3.8318	0.702	82	0.397256447	0.000917662	2.555617652	0.005903477
8.249361551	×ÔÉí³µÁ¾	Road 1	0.919040038	3.793633604	-3.00E-05	0.702713072	0.019607844	0	18.1727	977.1084	655.7373	3.8323	0.7016	83	0.428020511	0.000988727	2.562727754	0.005919901
8.265983039	×ÔÉí³µÁ¾	Road 1	0.936696183	3.824093199	-4.16E-05	0.702305377	0.027450981	0	18.1875	977.1084	655.7373	3.8326	0.7013	84	0.390063126	0.000901046	2.569211184	0.005934878
8.282850121	×ÔÉí³µÁ¾	Road 1	0.954766185	3.856743622	-5.47E-05	0.703136206	0.027450981	0	18.2035	977.1094	655.7373	3.8319	0.702	85	0.394242059	0.000910699	2.575860897	0.005950239
8.299408928	×ÔÉí³µÁ¾	Road 1	0.972716479	3.902518845	-7.02E-05	0.704357207	0.035294119	0	18.2261	977.1094	655.7373	3.8313	0.7016	86	0.423036947	0.000977215	2.582865884	0.00596642
8.315979099	×ÔÉí³µÁ¾	Road 1	0.99081984	3.933097744	-8.87E-05	0.705587924	0.043137256	0	18.2414	977.1094	655.7373	3.8316	0.7013	87	0.393072206	0.000907997	2.589379157	0.005981466
8.33274611	×ÔÉí³µÁ¾	Road 1	1.009352523	3.979102564	-0.000105741	0.707647264	0.043137256	0	18.2644	977.1104	655.7373	3.831	0.7019	88	0.424754004	0.000981182	2.596501013	0.005997917
8.349347072	×ÔÉí³µÁ¾	Road 1	1.027772536	3.994470119	-0.000122302	0.708057284	0.043137256	0	18.2722	977.1104	655.7373	3.8312	0.7018	89	0.362961994	0.000838442	2.602526531	0.006011836
8.366048103	×ÔÉí³µÁ¾	Road 1	1.046517854	4.04065733	-0.000139273	0.709695518	0.050980393	0	18.2956	977.1104	655.7373	3.8316	0.7013	90	0.427445684	0.0009874	2.609665315	0.006028327
8.382709546	×ÔÉí³µÁ¾	Road 1	1.065433293	4.087015772	-0.000154824	0.712564945	0.05882353	0	18.3193	977.1104	655.7373	3.832	0.7009	91	0.429503853	0.000992154	2.616821469	0.006044858
8.399318572	×ÔÉí³µÁ¾	Road 1	1.08443234	4.11803627	-0.000169801	0.714643002	0.06666667	0	18.3353	977.1113	655.7373	3.8313	0.7016	92	0.398246091	0.000919948	2.623435948	0.006060137
8.416013005	×ÔÉí³µÁ¾	Road 1	1.103683742	4.151386642	-0.000186311	0.716672421	0.06666667	0	18.3525	977.1113	655.7373	3.8316	0.7013	93	0.40367032	0.000932478	2.630174995	0.006075704
8.432744094	×ÔÉí³µÁ¾	Road 1	1.123195226	4.198252773	-0.000199451	0.719561458	0.074509807	0	18.3769	977.1113	655.7373	3.8321	0.7008	94	0.433714554	0.001001881	2.637431512	0.006092467
8.449316098	×ÔÉí³µÁ¾	Road 1	1.142665553	4.229614019	-0.000210591	0.721180797	0.074509807	0	18.3933	977.1123	655.7373	3.8314	0.7015	95	0.401812826	0.000928188	2.644090356	0.006107849
8.466120865	×ÔÉí³µÁ¾	Road 1	1.162556083	4.261047363	-0.000222811	0.722420096	0.074509807	0	18.4098	977.1123	655.7373	3.8317	0.7012	96	0.401766525	0.000928081	2.650841948	0.006123445
8.482725858	×ÔÉí³µÁ¾	Road 1	1.182438434	4.310538626	-0.000232366	0.723640978	0.074509807	0	18.436	977.1133	655.7373	3.8312	0.7017	97	0.443917504	0.001025449	2.658213196	0.006140472
8.49934698	×ÔÉí³µÁ¾	Road 1	1.202485706	4.342076254	-0.000241479	0.72405231	0.074509807	0	18.4528	977.1133	655.7373	3.8315	0.7014	98	0.404712995	0.000934887	2.66493998	0.006156011
8.516005858	×ÔÉí³µÁ¾	Road 1	1.222724484	4.37361989	-0.000250101	0.724053085	0.06666667	0	18.4697	977.1133	655.7373	3.8318	0.7011	99	0.405327158	0.000936306	2.671692275	0.006171609
8.532698092	×ÔÉí³µÁ¾	Road 1	1.243170916	4.409664917	-0.000254855	0.723635197	0.06666667	0	18.4893	977.1143	655.7373	3.8312	0.7017	100	0.416251531	0.000961541	2.678640443	0.006187659
8.549385194	×ÔÉí³µÁ¾	Road 1	1.263767526	4.443419552	-0.000258925	0.722807288	0.06666667	0	18.5077	977.1143	655.7373	3.8315	0.7014	101	0.411940179	0.000951582	2.685514531	0.006203539
8.565950233	×ÔÉí³µÁ¾	Road 1	1.284389324	4.481635666	-0.000260789	0.722398996	0.06666667	0	18.5288	977.1143	655.7373	3.8319	0.701	102	0.42382807	0.000979043	2.69253526	0.006219756
8.582676923	×ÔÉí³µÁ¾	Road 1	1.305389694	4.519802427	-0.000262662	0.721571624	0.06666667	0	18.55	977.1152	655.7373	3.8313	0.7016	103	0.423904399	0.000979219	2.699625777	0.006236136
8.599273119	×ÔÉí³µÁ¾	Road 1	1.326391705	4.555696821	-0.00026379	0.721153975	0.06666667	0	18.5702	977.1152	655.7373	3.8317	0.7013	104	0.420247992	0.000970773	2.706600295	0.006252247
8.616014838	×ÔÉí³µÁ¾	Road 1	1.347755023	4.593790197	-0.00026379	0.72032392	0.06666667	0	18.5918	977.1162	655.7373	3.8321	0.7018	105	0.425685283	0.000983333	2.713726999	0.006268709
8.632898781	×ÔÉí³µÁ¾	Road 1	1.369551789	4.647513771	-0.00026379	0.71949476	0.06666667	0	18.6226	977.1162	655.7373	3.8326	0.7013	106	0.463206876	0.001070008	2.721547757	0.006286775
8.64933186	×ÔÉí³µÁ¾	Road 1	1.390909368	4.678811932	-0.00026379	0.719075084	0.06666667	0	18.6408	977.1172	655.7373	3.832	0.7019	107	0.413143427	0.000954361	2.728336976	0.006302458
8.665997335	×ÔÉí³µÁ¾	Road 1	1.412713847	4.710104084	-0.00026379	0.719076753	0.074509807	0	18.659	977.1172	655.7373	3.8323	0.7016	108	0.4128098	0.000953591	2.735216647	0.00631835
8.682772044	×ÔÉí³µÁ¾	Road 1	1.434817465	4.743630838	-0.00026379	0.719067752	0.082352944	0	18.6787	977.1172	655.7373	3.8327	0.7012	109	0.41853866	0.000966824	2.742237511	0.006334569
8.699275502	×ÔÉí³µÁ¾	Road 1	1.4567277	4.779413223	-0.00026379	0.719888031	0.082352944	0	18.6999	977.1182	655.7373	3.8321	0.7018	110	0.426391353	0.000984964	2.749274443	0.006350824
8.71602052	×ÔÉí³µÁ¾	Road 1	1.479208788	4.833193874	-0.00026379	0.721518755	0.090196081	0	18.7319	977.1182	655.7373	3.8327	0.7013	111	0.470994218	0.001087997	2.75716125	0.006369042
8.732782399	×ÔÉí³µÁ¾	Road 1	1.501858942	4.864642668	-0.00026379	0.723178744	0.098039217	0	18.7508	977.1191	655.7373	3.832	0.7019	112	0.416457217	0.000962016	2.764141855	0.006385168
8.750008706	×ÔÉí³µÁ¾	Road 1	1.525374062	4.914253235	-0.00026379	0.726459563	0.105882354	0	18.7807	977.1191	655.7373	3.8326	0.7013	113	0.459911965	0.001062397	2.77206444	0.006403469
8.765929339	×ÔÉí³µÁ¾	Road 1	1.547247062	4.945959091	-0.00026379	0.72726959	0.113725491	0	18.7998	977.1201	655.7373	3.832	0.702	114	0.423317905	0.000977864	2.778803929	0.006419037
8.782693051	×ÔÉí³µÁ¾	Road 1	1.570426571	4.977789402	-0.00026379	0.731410444	0.121568628	0	18.8191	977.1201	655.7373	3.8323	0.7016	115	0.420135831	0.000970514	2.785846965	0.006435306
8.799460796	×ÔÉí³µÁ¾	Road 1	1.593835384	5.025823689	-0.00026379	0.736320853	0.137254909	0	18.8483	977.1211	655.7373	3.8319	0.7021	116	0.462917098	0.001069338	2.793609041	0.006453237
8.816002375	×ÔÉí³µÁ¾	Road 1	1.617076669	5.05807972	-0.000269479	0.740011394	0.145098045	0	18.8679	977.1211	655.7373	3.8322	0.7017	117	0.424306715	0.000980149	2.800627744	0.00646945
8.93276957	×ÔÉí³µÁ¾	Road 1	1.788931505	5.29838376	-0.000279533	0.760492384	0.160784319	0	19.0146	977.124	655.7373	3.8319	0.702	118	0.433304371	0.001000933	2.85122348	0.006586326
8.949401322	×ÔÉí³µÁ¾	Road 1	1.813751579	5.372390413	-0.000295483	0.76251328	0.168627456	0	19.0606	977.124	655.7373	3.8328	0.7012	119	0.546954244	0.001263464	2.860320287	0.00660734
8.966003383	×ÔÉí³µÁ¾	Road 1	1.838682568	5.406049347	-0.000645922	0.772417545	0.333333343	0	19.0815	977.125	655.7373	3.8322	0.7018	120	0.436469936	0.001008246	2.867566588	0.006624079
8.982802285	×ÔÉí³µÁ¾	Road 1	1.864070421	5.440609932	-0.000736012	0.794520438	0.356862754	0	19.1026	977.125	655.7373	3.8326	0.7014	121	0.438738539	0.001013486	2.874936914	0.006641104
8.99926982	×ÔÉí³µÁ¾	Road 1	1.889229378	5.500048542	-0.000838175	0.835746229	0.380392164	0	19.1376	977.126	655.7373	3.8322	0.7017	122	0.513412534	0.001185983	2.883391552	0.006660634
9.015921366	×ÔÉí³µÁ¾	Road 1	1.914844619	5.537916183	-0.000966282	0.862620056	0.411764711	0	19.159	977.126	655.7373	3.8326	0.7013	123	0.451536706	0.00104305	2.890910337	0.006678003
9.032759856	×ÔÉí³µÁ¾	Road 1	1.941012537	5.59459362	-0.001093162	0.90762645	0.450980395	0	19.19	977.127	655.7373	3.8322	0.7018	124	0.505427048	0.001167536	2.899420965	0.006697662
9.049343956	×ÔÉí³µÁ¾	Road 1	1.966977338	5.636319351	-0.001218114	0.943171203	0.490196079	0	19.2118	977.127	655.7373	3.8326	0.7014	125	0.465936485	0.001076313	2.907148102	0.006715512
9.065973876	×ÔÉí³µÁ¾	Road 1	1.993230414	5.683194923	-0.001358972	0.985007703	0.545098066	0	19.2338	977.127	655.7373	3.833	0.701	126	0.482071827	0.001113586	2.915164918	0.006734031
9.082751884	×ÔÉí³µÁ¾	Road 1	2.020027943	5.749854469	-0.001489894	1.058198929	0.58431375	0	19.2671	977.1279	655.7373	3.8326	0.7014	127	0.540997026	0.001249703	2.92424177	0.006754998
9.099307392	×ÔÉí³µÁ¾	Road 1	2.046699165	5.799664593	-0.001618848	1.111857891	0.615686297	0	19.2896	977.1289	655.7373	3.832	0.7019	128	0.495257355	0.001144044	2.932441008	0.006773939
9.116038481	×ÔÉí³µÁ¾	Road 1	2.074025413	5.879742479	-0.001765713	1.200621247	0.654901981	0	19.3237	977.1289	655.7373	3.8326	0.7013	129	0.587273085	0.001356601	2.942266726	0.006796636
9.132665835	×ÔÉí³µÁ¾	Road 1	2.101446584	5.936976957	-0.00189725	1.263250589	0.678431392	0	19.3466	977.1299	655.7373	3.8321	0.7019	130	0.521934262	0.001205668	2.950945111	0.006816683
9.149290989	×ÔÉí³µÁ¾	Road 1	2.12914334	5.997437382	-0.002032223	1.328611255	0.694117665	0	19.3699	977.1299	655.7373	3.8325	0.7015	131	0.534184894	0.001233967	2.959826018	0.006837198
9.165992753	×ÔÉí³µÁ¾	Road 1	2.157263536	6.061198425	-0.00217345	1.394302964	0.701960802	0	19.3933	977.1299	655.7373	3.8329	0.701	132	0.546060738	0.0012614	2.968946195	0.006858266
9.182745102	×ÔÉí³µÁ¾	Road 1	2.185849971	6.143088627	-0.002293895	1.47444582	0.725490212	0	19.4221	977.1309	655.7373	3.8325	0.7015	133	0.605561029	0.001398846	2.979090765	0.0068817
9.199329569	×ÔÉí³µÁ¾	Road 1	2.214696937	6.261828089	-0.002402251	1.585664868	0.725490212	0	19.4618	977.1318	655.7373	3.8322	0.7017	134	0.732472602	0.001692012	2.991238432	0.006909761
9.215981482	×ÔÉí³µÁ¾	Road 1	2.244016268	6.338586473	-0.002519048	1.65297699	0.741176486	0	19.4863	977.1318	655.7373	3.8327	0.7013	135	0.600274595	0.001386634	3.001234153	0.006932851
9.232701207	×ÔÉí³µÁ¾	Road 1	2.274019478	6.460127449	-0.002613427	1.754715562	0.749019623	0	19.5236	977.1328	655.7373	3.8324	0.7016	136	0.752261056	0.001737723	3.013811751	0.006961905
9.265960313	×ÔÉí³µÁ¾	Road 1	2.335610545	6.666680717	-0.002695923	1.914326906	0.764705896	0	19.5838	977.1338	655.7373	3.8325	0.7015	137	0.704112235	0.001626499	3.037229894	0.007016001
9.282741987	×ÔÉí³µÁ¾	Road 1	2.367154486	6.766797495	-0.002758471	1.985882163	0.78039217	0	19.6118	977.1348	655.7373	3.832	0.702	138	0.698923152	0.001614512	3.048958995	0.007043095
9.299387301	×ÔÉí³µÁ¾	Road 1	2.398890455	6.863762569	-0.002880889	2.053977013	0.80392158	0	19.6383	977.1348	655.7373	3.8325	0.7015	139	0.696484292	0.001608879	3.060552195	0.007069876
9.315986797	×ÔÉí³µÁ¾	Road 1	2.431002352	6.96423769	-0.002976464	2.124923944	0.811764717	0	19.6652	977.1357	655.7373	3.832	0.702	140	0.71583094	0.001653569	3.072434627	0.007097324
9.332693326	×ÔÉí³µÁ¾	Road 1	2.464087228	7.129281521	-0.00306253	2.234057903	0.819607854	0	19.7082	977.1367	655.7373	3.8318	0.7022	141	0.957060633	0.00221081	3.088423789	0.007134259
9.349273761	×ÔÉí³µÁ¾	Road 1	2.497426736	7.238786888	-0.003154175	2.302873611	0.835294127	0	19.7362	977.1367	655.7373	3.8323	0.7017	142	0.766336663	0.001770238	3.101129984	0.00716361
9.365992753	×ÔÉí³µÁ¾	Road 1	2.531645841	7.368193817	-0.003255669	2.377131462	0.843137264	0	19.7666	977.1377	655.7373	3.8319	0.7021	143	0.845837802	0.001953885	3.11527154	0.007196277
9.382715411	×ÔÉí³µÁ¾	Road 1	2.566653417	7.536318111	-0.003336778	2.479966164	0.858823538	0	19.8101	977.1387	655.7373	3.8317	0.7023	144	1.006095196	0.00232408	3.132096126	0.007235142
9.399362925	×ÔÉí³µÁ¾	Road 1	2.602108198	7.6670434	-0.003412994	2.553501368	0.866666675	0	19.8418	977.1387	655.7373	3.8323	0.7017	145	0.875493761	0.002022391	3.14667092	0.00726881
9.415954723	×ÔÉí³µÁ¾	Road 1	2.638275687	7.847429466	-0.003486149	2.648475409	0.874509811	0	19.8849	977.1396	655.7373	3.8321	0.7019	146	1.089871196	0.002517602	3.164753843	0.007310581
9.432769753	×ÔÉí³µÁ¾	Road 1	2.675538549	7.97776165	-0.003543292	2.715432644	0.890196085	0	19.9157	977.1406	655.7373	3.8317	0.7023	147	0.89206163	0.002060662	3.179753886	0.007345231
9.449335892	×ÔÉí³µÁ¾	Road 1	2.712864904	8.111418056	-0.003581732	2.781458139	0.898039222	0	19.9469	977.1406	655.7373	3.8326	0.7017	148	0.923988777	0.002134414	3.195060812	0.00738059
9.465985239	×ÔÉí³µÁ¾	Road 1	2.751058099	8.25831213	-0.003609667	2.851493597	0.905882359	0	19.9811	977.1416	655.7373	3.8322	0.7021	149	0.988298893	0.00228297	3.211515343	0.0074186
9.482750784	×ÔÉí³µÁ¾	Road 1	2.790552634	8.480507183	-0.003626929	2.951486588	0.913725495	0	20.0322	977.1426	655.7373	3.8322	0.7012	150	1.324531087	0.003059667	3.233721829	0.007469897
9.499329386	×ÔÉí³µÁ¾	Road 1	2.830276555	8.625945568	-0.003633417	3.013140678	0.921568632	0	20.0655	977.1436	655.7373	3.8318	0.7016	151	1.015537168	0.002345891	3.250558015	0.007508789
9.515992295	×ÔÉí³µÁ¾	Road 1	2.870889926	8.774466133	-0.003637746	3.073344707	0.929411769	0	20.0993	977.1445	655.7373	3.8315	0.7019	152	1.038405547	0.002398717	3.267860873	0.007548759
9.53268123	×ÔÉí³µÁ¾	Road 1	2.912370745	8.94790163	-0.003637746	3.140552521	0.929411769	0	20.1387	977.1445	655.7373	3.8322	0.7012	153	1.165413487	0.002692105	3.287310383	0.007593687
9.549374197	×ÔÉí³µÁ¾	Road 1	2.95504793	9.203748322	-0.003637746	3.23164463	0.937254906	0	20.1968	977.1465	655.7373	3.8313	0.7021	154	1.573698006	0.003635242	3.313580072	0.00765437
9.565971859	×ÔÉí³µÁ¾	Road 1	2.998216105	9.363091278	-0.003637746	3.284186363	0.937254906	0	20.2329	977.1465	655.7373	3.8319	0.7015	155	1.143030143	0.0026404	3.3325517	0.007698194
9.582746202	×ÔÉí³µÁ¾	Road 1	3.043034531	9.61863842	-0.003644247	3.33419776	0.937254906	0	20.2909	977.1475	655.7373	3.832	0.7014	156	1.624334853	0.003752214	3.359798849	0.007761135
9.599322238	×ÔÉí³µÁ¾	Road 1	3.087648761	9.689362907	-0.003652926	3.381099701	0.945098042	0	20.307	977.1484	655.7373	3.8313	0.7021	157	0.7313285	0.001689369	3.371921377	0.007789138
9.616038298	×ÔÉí³µÁ¾	Road 1	3.134029405	9.988616753	-0.003683412	3.44294548	0.945098042	0	20.3587	977.1494	655.7373	3.8313	0.7021	158	1.899880937	0.004388725	3.403679901	0.007862501
9.632727599	×ÔÉí³µÁ¾	Road 1	3.181183693	10.17151251	-0.003711873	3.506049156	0.945098042	0	20.4174	977.1504	655.7373	3.8314	0.702	159	1.333756549	0.003080978	3.425939366	0.00791392
9.65002795	×ÔÉí³µÁ¾	Road 1	3.230894764	10.34429054	-0.003767015	3.544405699	0.945098042	0	20.4573	977.1514	655.7373	3.8311	0.7023	160	1.265785572	0.002923965	3.4478379	0.007964506
9.665933921	×ÔÉí³µÁ¾	Road 1	3.277759668	10.60693846	-0.003836147	3.597438097	0.945098042	0	20.5184	977.1523	655.7373	3.8313	0.7012	161	1.877378301	0.004336744	3.477699425	0.008033486
9.682635319	×ÔÉí³µÁ¾	Road 1	3.327908519	10.80962591	-0.003926591	3.633908033	0.937254906	0	20.566	977.1533	655.7373	3.8311	0.7013	162	1.507144992	0.003481505	3.502870853	0.008091632
9.699275868	×ÔÉí³µÁ¾	Road 1	3.378701793	10.98856659	-0.00402771	3.661806107	0.937254906	0	20.6084	977.1543	655.7373	3.8309	0.7015	163	1.398316139	0.00323011	3.526139602	0.008145382
9.715901023	×ÔÉí³µÁ¾	Road 1	3.430280532	11.16882648	-0.004149435	3.687221527	0.937254906	0	20.6515	977.1553	655.7373	3.8307	0.7017	164	1.424958921	0.003291655	3.549829764	0.008200107
9.732660336	×ÔÉí³µÁ¾	Road 1	3.48360577	11.45457745	-0.004317133	3.723419666	0.937254906	0	20.7207	977.1563	655.7373	3.831	0.7014	165	2.055848759	0.004749011	3.584284378	0.008279697
9.749234173	×ÔÉí³µÁ¾	Road 1	3.537184614	11.63785086	-0.004479331	3.745028019	0.937254906	0	20.7656	977.1572	655.7373	3.8309	0.7016	166	1.493906624	0.003450924	3.609044142	0.008336892
9.765906246	×ÔÉí³µÁ¾	Road 1	3.591934477	11.82213535	-0.004653194	3.764068604	0.937254906	0	20.8112	977.1582	655.7373	3.8307	0.7017	167	1.51244505	0.003493748	3.634259737	0.00839514
9.782717244	×ÔÉí³µÁ¾	Road 1	3.648499462	12.11313829	-0.004849837	3.778351068	0.937254906	0	20.8844	977.1602	655.7373	3.8301	0.7024	168	2.184511191	0.005046221	3.67098355	0.008479972
9.799300611	×ÔÉí³µÁ¾	Road 1	3.705153211	12.29867849	-0.005046554	3.781883478	0.937254906	0	20.9318	977.1611	655.7373	3.83	0.7025	169	1.575836902	0.003640183	3.697116232	0.008540338
9.815886177	×ÔÉí³µÁ¾	Road 1	3.763097512	12.5771699	-0.005265128	3.78305459	0.937254906	0	21.0044	977.1621	655.7373	3.8303	0.7012	170	2.202677852	0.005088186	3.733648891	0.008624729
9.832661253	×ÔÉí³µÁ¾	Road 1	3.822569115	12.76285	-0.005435966	3.782640934	0.937254906	0	21.0537	977.1631	655.7373	3.8302	0.7013	171	1.611233789	0.00372195	3.76067746	0.008687165
9.849297403	×ÔÉí³µÁ¾	Road 1	3.882405985	12.94847174	-0.00559025	3.780981064	0.937254906	0	21.1037	977.1641	655.7373	3.8302	0.7013	172	1.640315606	0.003789129	3.787965997	0.008750201
9.865868674	×ÔÉí³µÁ¾	Road 1	3.943289967	13.22664642	-0.005729819	3.776045084	0.937254906	0	21.1801	977.166	655.7374	3.8296	0.7019	173	2.301473927	0.005316405	3.826104344	0.008838301
9.882684437	×ÔÉí³µÁ¾	Road 1	4.005937231	13.41182957	-0.005862756	3.770620108	0.937254906	0	21.2319	977.167	655.7374	3.8286	0.702	174	1.671899737	0.003862088	3.854218615	0.008903245
9.899208789	×ÔÉí³µÁ¾	Road 1	4.068408166	13.60993624	-0.005940493	3.764536858	0.937254906	0	21.2882	977.168	655.7374	3.8286	0.7019	175	1.805672603	0.004171104	3.884056183	0.00897217
9.915912386	×ÔÉí³µÁ¾	Road 1	4.132413074	13.79449368	-0.006009831	3.75758791	0.937254906	0	21.3415	977.1689	655.7374	3.8286	0.7019	176	1.715644732	0.003963139	3.912713621	0.009038368
9.932627346	×ÔÉí³µÁ¾	Road 1	4.197865418	14.09685888	-0.006034074	3.74427557	0.937254906	0	21.4306	977.1709	655.7374	3.8283	0.7023	177	2.589755536	0.005982335	3.956001283	0.009138363
9.94927706	×ÔÉí³µÁ¾	Road 1	4.263910798	14.28032799	-0.006034074	3.73490715	0.937254906	0	21.4858	977.1729	655.7374	3.8273	0.7022	178	1.762234707	0.004070762	3.985341986	0.00920614
9.965874356	×ÔÉí³µÁ¾	Road 1	4.330591834	14.46330357	-0.006034074	3.724943638	0.937254906	0	21.5417	977.1738	655.7374	3.8274	0.7022	179	1.781735124	0.004115808	4.014913971	0.009274451
9.982601046	×ÔÉí³µÁ¾	Road 1	4.39912379	14.74978237	-0.006034074	3.707739592	0.937254906	0	21.631	977.1758	655.7374	3.827	0.7025	180	2.576657084	0.005952078	4.058012916	0.00937401
9.999284849	×ÔÉí³µÁ¾	Road 1	4.468321566	14.93136749	-0.006034074	3.697214842	0.945098042	0	21.6887	977.1768	655.7374	3.8271	0.7025	181	1.812015639	0.004185756	4.088244228	0.009443844
10.01588764	×ÔÉí³µÁ¾	Road 1	4.538018441	15.11244106	-0.006034074	3.687273502	0.945098042	0	21.7472	977.1777	655.7374	3.8272	0.7024	182	1.83337375	0.004235093	4.118683355	0.009514159
10.03260444	×ÔÉí³µÁ¾	Road 1	4.609510218	15.39591923	-0.006034074	3.670196056	0.945098042	0	21.8404	977.1797	655.7374	3.8269	0.7017	183	2.655214432	0.006133545	4.163070026	0.009616692
10.05072661	×ÔÉí³µÁ¾	Road 1	4.687916795	15.57560062	-0.006034074	3.659811735	0.945098042	0	21.9006	977.1816	655.7374	3.8261	0.7026	184	1.748044402	0.004037983	4.194748383	0.009689869
10.06697274	×ÔÉí³µÁ¾	Road 1	4.759419359	15.84433651	-0.006034074	3.650406122	0.952941179	0	21.9923	977.1836	655.7374	3.8258	0.7029	185	2.668996819	0.006165383	4.238109266	0.009790032
10.08267637	×ÔÉí³µÁ¾	Road 1	4.828980111	15.94654713	-0.006034074	3.64722991	0.952941179	0	22.0276	977.1846	655.7374	3.8254	0.7032	186	1.318119292	0.003044856	4.258808526	0.009837848
10.09922712	×ÔÉí³µÁ¾	Road 1	4.903700733	16.25269833	-0.006034074	3.639556646	0.960784316	0	22.135	977.1865	655.7374	3.8254	0.7022	187	3.000046231	0.006930107	4.308461521	0.009952546
10.11602052	×ÔÉí³µÁ¾	Road 1	4.980348575	16.43098927	-0.006034074	3.634397984	0.960784316	0	22.1985	977.1885	655.7374	3.8246	0.703	188	1.927152118	0.004451721	4.340824964	0.010027306
10.13275161	×ÔÉí³µÁ¾	Road 1	5.05795299	16.69801025	-0.006034074	3.627738953	0.960784316	0	22.2952	977.1904	655.7374	3.8244	0.7032	189	2.714485858	0.006270462	4.386241268	0.010132217
10.14921988	×ÔÉí³µÁ¾	Road 1	5.135151225	16.87570553	-0.006034074	3.623250008	0.968627453	0	22.3605	977.1914	655.7374	3.8247	0.703	190	1.996601616	0.00461215	4.419121839	0.010208171
10.16597076	×ÔÉí³µÁ¾	Road 1	5.214500093	17.05318623	-0.006034074	3.619107723	0.968627453	0	22.4264	977.1934	655.7374	3.8239	0.7028	191	1.985974452	0.004587601	4.452388665	0.010285018
10.18272714	×ÔÉí³µÁ¾	Road 1	5.295112548	17.31906395	-0.006034074	3.614207745	0.97647059	0	22.5267	977.1953	655.7374	3.8238	0.7029	192	2.791340915	0.006447998	4.499161437	0.010393063
10.19922473	×ÔÉí³µÁ¾	Road 1	5.375291464	17.49613438	-0.006034074	3.611779451	0.97647059	0	22.5944	977.1973	655.7374	3.823	0.7037	193	2.050727181	0.00473718	4.532993499	0.010471215
10.21586052	×ÔÉí³µÁ¾	Road 1	5.457017847	17.68566914	-0.006034074	3.608006954	0.97647059	0	22.6677	977.1992	655.7374	3.8214	0.7043	194	2.169550515	0.005011662	4.569085673	0.010554588
10.23256082	×ÔÉí³µÁ¾	Road 1	5.539880831	17.86236019	-0.006037109	3.60329318	0.97647059	0	22.7368	977.2002	655.7374	3.8217	0.704	195	2.064062412	0.004767984	4.603556131	0.010634215
10.24925012	×ÔÉí³µÁ¾	Road 1	5.624033371	18.15229626	-0.006049259	3.600874662	0.97647059	0	22.8519	977.2031	655.7374	3.8209	0.7039	196	3.14468458	0.007264221	4.65603872	0.010755449
10.26615202	×ÔÉí³µÁ¾	Road 1	5.710145401	18.34132462	-0.006052299	3.599411726	0.97647059	0	22.9279	977.2051	655.7374	3.8203	0.7045	197	2.206219099	0.005096366	4.693328024	0.010841588
10.28264448	×ÔÉí³µÁ¾	Road 1	5.794921249	18.50500374	-0.006064469	3.594247341	0.97647059	0	22.9945	977.2061	655.7374	3.8205	0.7043	198	2.024029617	0.004675508	4.726709253	0.010918698
10.29920072	×ÔÉí³µÁ¾	Road 1	5.881294411	18.78103695	-0.006088859	3.575999737	0.97647059	0	23.1084	977.209	655.7375	3.8197	0.7041	199	3.132216164	0.007235419	4.778566981	0.01103849
10.31592228	×ÔÉí³µÁ¾	Road 1	5.96945863	18.98095722	-0.006116376	3.56714654	0.97647059	0	23.1923	977.2109	655.7375	3.8192	0.7046	200	2.398453402	0.005540427	4.818672859	0.011131134
10.33261892	×ÔÉí³µÁ¾	Road 1	6.058301278	19.15557117	-0.006147048	3.562582731	0.97647059	0	23.2665	977.2129	655.7375	3.8186	0.7052	201	2.172340732	0.005018107	4.854943635	0.01121492
10.34962419	×ÔÉí³µÁ¾	Road 1	6.150078944	19.42924404	-0.006183988	3.544840097	0.97647059	0	23.3844	977.2158	655.7375	3.8178	0.706	202	3.134282612	0.007240193	4.908242966	0.011338041
10.36592897	×ÔÉí³µÁ¾	Road 1	6.238860036	19.60234051	-0.006202514	3.52452302	0.97647059	0	23.4603	977.2168	655.7375	3.8182	0.7046	203	2.242954532	0.005181225	4.944813855	0.01142252
10.38270002	×ÔÉí³µÁ¾	Road 1	6.330981595	19.7744173	-0.006227273	3.506086111	0.97647059	0	23.5368	977.2188	655.7375	3.8177	0.7052	204	2.199563717	0.005080992	4.981702834	0.011507734
10.44924792	×ÔÉí³µÁ¾	Road 1	6.712010439	20.6122776	-0.006252097	3.437233448	0.97647059	0	23.9239	977.2285	655.7375	3.8149	0.707	205	2.657462009	0.006138737	5.158551357	0.011916254
10.46587894	×ÔÉí³µÁ¾	Road 1	6.80800908	20.78015213	-0.006270758	3.426288843	0.97647059	0	24.0044	977.2305	655.7375	3.8135	0.7075	206	2.267008638	0.00523679	5.196254021	0.012003347
10.48326873	×ÔÉí³µÁ¾	Road 1	6.909598983	21.03094082	-0.00629882	3.408341169	0.97647059	0	24.1264	977.2334	655.7375	3.8128	0.7072	207	3.069056391	0.00708952	5.249624268	0.012126632
10.4992722	×ÔÉí³µÁ¾	Road 1	7.003829374	21.19723434	-0.00629882	3.391526461	0.97647059	0	24.2085	977.2354	655.7375	3.8123	0.7077	208	2.360902538	0.005453685	5.287406912	0.01221391
10.51624998	×ÔÉí³µÁ¾	Road 1	7.104576985	21.36270905	-0.00629882	3.377035856	0.97647059	0	24.2912	977.2373	655.7375	3.8118	0.7081	209	2.258553596	0.005217259	5.325752141	0.012302487
10.53259106	×ÔÉí³µÁ¾	Road 1	7.202667644	21.60974178	-0.00629882	3.360904694	0.97647059	0	24.4166	977.2402	655.7376	3.8112	0.7078	210	3.275105973	0.007565495	5.379270887	0.012426116
10.54934927	×ÔÉí³µÁ¾	Road 1	7.304026003	21.77380543	-0.00629882	3.350465059	0.97647059	0	24.5009	977.2422	655.7376	3.8108	0.7083	211	2.304591138	0.005323606	5.417891719	0.01251533
10.56587765	×ÔÉí³µÁ¾	Road 1	7.404744586	21.93722706	-0.00629882	3.335547924	0.97647059	0	24.5859	977.2441	655.7376	3.8104	0.7087	212	2.338091241	0.005400991	5.456536587	0.0126046
10.5825292	×ÔÉí³µÁ¾	Road 1	7.507340698	22.18088322	-0.00629882	3.318594456	0.97647059	0	24.6777	977.2461	655.7376	3.8101	0.709	213	3.261994774	0.007535208	5.510853844	0.012730072
10.5992383	×ÔÉí³µÁ¾	Road 1	7.611095091	22.35404148	-0.00629882	3.302221775	0.97647059	0	24.8074	977.25	655.7376	3.8085	0.7096	214	2.468089183	0.005701286	5.552093382	0.012825336
10.615932	×ÔÉí³µÁ¾	Road 1	7.715501061	22.51516972	-0.00629882	3.293168783	0.97647059	0	24.8946	977.252	655.7377	3.8082	0.7099	215	2.346448505	0.005420296	5.59126429	0.012915821
10.63255019	×ÔÉí³µÁ¾	Road 1	7.820598112	22.76718407	-0.00629882	3.271576643	0.97647059	0	25.033	977.2549	655.7377	3.8077	0.7104	216	3.44432429	0.007956389	5.648502724	0.013048041
10.64919807	×ÔÉí³µÁ¾	Road 1	7.926620175	22.9266077	-0.00629882	3.257002831	0.97647059	0	25.1218	977.2578	655.7377	3.8064	0.7107	217	2.369067513	0.005472546	5.687942677	0.013139148
10.6658804	×ÔÉí³µÁ¾	Road 1	8.033597354	23.0853653	-0.00629882	3.244433641	0.97647059	0	25.2113	977.2598	655.7377	3.8061	0.711	218	2.371597984	0.005478391	5.727506474	0.01323054
10.68285892	×ÔÉí³µÁ¾	Road 1	8.143695411	23.34438686	-0.00629882	3.212311983	0.97647059	0	25.3596	977.2637	655.7377	3.8049	0.7123	219	3.542231306	0.008182554	5.787648299	0.013369468
10.69933782	×ÔÉí³µÁ¾	Road 1	8.251268298	23.50050259	-0.00629882	3.185945272	0.97647059	0	25.4506	977.2656	655.7377	3.8036	0.7116	220	2.400406827	0.00554494	5.827204359	0.013460842
10.7158596	×ÔÉí³µÁ¾	Road 1	8.35983173	23.65533428	-0.00629882	3.161800385	0.97647059	0	25.5423	977.2686	655.7377	3.8023	0.7129	221	2.393493468	0.00552897	5.866749144	0.013552191
10.73258849	×ÔÉí³µÁ¾	Road 1	8.470826384	23.88567123	-0.00629882	3.136619806	0.97647059	0	25.681	977.2715	655.7377	3.8019	0.7133	222	3.314223432	0.007655856	5.922192422	0.013680264
10.74921951	×ÔÉí³µÁ¾	Road 1	8.581877013	24.0383503	-0.00629882	3.124596834	0.97647059	0	25.7742	977.2744	655.7377	3.8007	0.7135	223	2.388029662	0.005516349	5.961907789	0.013772007
10.7659407	×ÔÉí³µÁ¾	Road 1	8.694235693	24.19033585	-0.00629882	3.109444141	0.97647059	0	25.8679	977.2764	655.7377	3.8004	0.7138	224	2.382336992	0.005503198	6.001743303	0.013864027
10.78268792	×ÔÉí³µÁ¾	Road 1	8.807922546	24.43824921	-0.00629882	3.083266258	0.97647059	0	26.0233	977.2803	655.7378	3.7993	0.7149	225	3.600587646	0.008317357	6.062043127	0.01400332
10.79925662	×ÔÉí³µÁ¾	Road 1	8.921038485	24.57750263	-0.006311318	3.071642399	0.97647059	0	26.1117	977.2832	655.7378	3.798	0.7153	226	2.271224039	0.005246528	6.099674367	0.014090248
10.81594116	×ÔÉí³µÁ¾	Road 1	9.035983608	24.80155506	-0.006323834	3.058464766	0.97647059	0	26.2557	977.2871	655.7378	3.7967	0.7166	227	3.358143189	0.007757311	6.155703429	0.014219675
10.83265319	×ÔÉí³µÁ¾	Road 1	9.151907006	24.97148952	-0.006370913	3.044886589	0.97647059	0	26.3663	977.2891	655.7378	3.7968	0.7165	228	2.68112581	0.006193401	6.200510478	0.014323179
10.84926588	×ÔÉí³µÁ¾	Road 1	9.267824451	25.11951828	-0.006421388	3.032184124	0.97647059	0	26.4637	977.292	655.7378	3.7956	0.7167	229	2.424003897	0.005599449	6.240779707	0.014416201
10.86585658	×ÔÉí³µÁ¾	Road 1	9.384364849	25.28799191	-0.006491225	3.021790981	0.97647059	0	26.5757	977.2949	655.7379	3.7947	0.7176	230	2.708482771	0.006256595	6.285715326	0.014520002
10.88266024	×ÔÉí³µÁ¾	Road 1	9.503478701	25.51882668	-0.006574411	3.014502764	0.97647059	0	26.731	977.2988	655.7379	3.7936	0.7187	231	3.514277325	0.008117981	6.344768072	0.014656414
10.89920696	×ÔÉí³µÁ¾	Road 1	9.621444027	25.66523151	-0.006648588	3.001469135	0.97647059	0	26.8305	977.3018	655.7379	3.7925	0.7189	232	2.456486262	0.005674483	6.385414841	0.014750308
10.91592412	×ÔÉí³µÁ¾	Road 1	9.741302102	25.81114712	-0.006736375	2.991340876	0.97647059	0	26.9305	977.3047	655.7379	3.7904	0.72	233	2.442221448	0.005641532	6.426241847	0.014844619
10.932664	×ÔÉí³µÁ¾	Road 1	9.862047505	25.96692982	-0.006841416	2.982311964	0.97647059	0	27.0384	977.3076	655.7379	3.7894	0.721	234	2.584036631	0.005969125	6.469498326	0.014944541
10.94921658	×ÔÉí³µÁ¾	Road 1	9.982441743	26.18439903	-0.006944209	2.974495888	0.97647059	0	27.1905	977.3115	655.7379	3.7883	0.7211	235	3.464262333	0.008002446	6.526840792	0.015077002
10.96587326	×ÔÉí³µÁ¾	Road 1	10.10426233	26.32902718	-0.007051393	2.968147516	0.97647059	0	27.2926	977.3145	655.7379	3.7872	0.7222	236	2.475015282	0.005717285	6.568066325	0.015172233
10.98272714	×ÔÉí³µÁ¾	Road 1	10.22858535	26.55547085	-0.007173287	2.959351778	0.97647059	0	27.4541	977.3184	655.7379	3.7863	0.7232	237	3.576777203	0.008262355	6.628348917	0.015311486
10.99925076	×ÔÉí³µÁ¾	Road 1	10.35113116	26.69905014	-0.007275932	2.947797537	0.97647059	0	27.5577	977.3213	655.738	3.7852	0.7233	238	2.507181187	0.005791589	6.669776622	0.015407184
11.01588508	×ÔÉí³µÁ¾	Road 1	10.47525463	26.86280823	-0.007369146	2.942163706	0.97647059	0	27.6767	977.3252	655.738	3.7835	0.725	239	2.787366765	0.006438817	6.716142567	0.015514289
11.03267298	×ÔÉí³µÁ¾	Road 1	10.60114359	26.9956398	-0.007477147	2.937701941	0.97647059	0	27.7739	977.3271	655.738	3.7833	0.7252	240	2.351338666	0.005431592	6.755616618	0.015605474
11.04926441	×ÔÉí³µÁ¾	Road 1	10.72654528	27.20959339	-0.007547382	2.926197052	0.97647059	0	27.932	977.332	655.738	3.7813	0.7263	241	3.531998973	0.008158918	6.814217535	0.015740843
11.06591926	×ÔÉí³µÁ¾	Road 1	10.85313081	27.36188278	-0.007621601	2.918614864	0.97647059	0	28.0456	977.335	655.738	3.7804	0.7272	242	2.668958706	0.006165295	6.858668629	0.015843525
11.08267711	×ÔÉí³µÁ¾	Road 1	10.98115952	27.50373173	-0.007703444	2.914271116	0.968627453	0	28.1523	977.3379	655.738	3.7794	0.7272	243	2.520658115	0.00582272	6.900909433	0.015941101
11.09924434	×ÔÉí³µÁ¾	Road 1	11.10870887	27.71600475	-0.007778681	2.904619217	0.968627453	0	28.3133	977.3428	655.7381	3.7765	0.7291	244	3.572756219	0.008253067	6.960100137	0.016077831
11.11591422	×ÔÉí³µÁ¾	Road 1	11.23770121	27.85698509	-0.007850789	2.894395113	0.968627453	0	28.4214	977.3457	655.7381	3.7755	0.7301	245	2.54749287	0.005884709	7.002566522	0.016175929
11.13371125	×ÔÉí³µÁ¾	Road 1	11.37645635	28.06751404	-0.007948839	2.880439281	0.968627453	0	28.5844	977.3506	655.7381	3.7736	0.7311	246	3.376876035	0.007800584	7.0626649	0.016314756
11.14933571	×ÔÉí³µÁ¾	Road 1	11.49888004	28.20740089	-0.008025663	2.874847412	0.968627453	0	28.6938	977.3535	655.7382	3.7726	0.732	247	2.696448297	0.006228796	7.104795438	0.016412077
11.16702827	×ÔÉí³µÁ¾	Road 1	11.63819352	28.34685173	-0.008125161	2.862825394	0.968627453	0	28.8038	977.3564	655.7382	3.7717	0.732	248	2.446574483	0.005651587	7.148081618	0.016512069
11.18506687	×ÔÉí³µÁ¾	Road 1	11.78132059	28.56416817	-0.008203114	2.829064846	0.968627453	0	28.9776	977.3613	655.7382	3.77	0.7337	249	3.484740174	0.00804975	7.210941433	0.016657275
11.20094681	×ÔÉí³µÁ¾	Road 1	11.90800939	28.7204813	-0.008292813	2.804346323	0.968627453	0	29.1049	977.3652	655.7382	3.7684	0.7344	250	2.959888981	0.006837344	7.257944309	0.016765851
11.21588398	×ÔÉí³µÁ¾	Road 1	12.02777999	28.86586647	-0.008386942	2.786159992	0.968627453	0	29.2248	977.3691	655.7382	3.7666	0.7361	251	2.946403032	0.006806191	7.301955212	0.016867517
11.23262056	×ÔÉí³µÁ¾	Road 1	12.16260591	29.00073395	-0.008455154	2.771591187	0.968627453	0	29.3373	977.3721	655.7382	3.7657	0.737	252	2.540451178	0.005868442	7.344473695	0.016965734
11.24916984	×ÔÉí³µÁ¾	Road 1	12.29680312	29.19220848	-0.008519914	2.759199619	0.968627453	0	29.4989	977.377	655.7383	3.7638	0.738	253	3.436329262	0.007937921	7.40134246	0.017097101
11.26584228	×ÔÉí³µÁ¾	Road 1	12.43261635	29.32550011	-0.008554333	2.742488384	0.968627453	0	29.6127	977.3809	655.7383	3.761	0.7398	254	2.549588602	0.00588955	7.443850322	0.017195294
11.2825994	×ÔÉí³µÁ¾	Road 1	12.56973775	29.45835571	-0.008558162	2.734729528	0.968627453	0	29.7269	977.3838	655.7383	3.7601	0.7397	255	2.542945625	0.005874204	7.486462753	0.017293729
11.29916187	×ÔÉí³µÁ¾	Road 1	12.70622417	29.66652946	-0.00856966	2.729651451	0.968627453	0	29.9076	977.3896	655.7383	3.7575	0.7422	256	3.741841812	0.008643655	7.548436907	0.017436889
11.31645416	×ÔÉí³µÁ¾	Road 1	12.84940472	29.8080883	-0.00856966	2.721395493	0.968627453	0	30.0314	977.3936	655.7384	3.7559	0.7429	257	2.635615515	0.006088272	7.594012726	0.017542169
11.33264604	×ÔÉí³µÁ¾	Road 1	12.98432094	29.9964077	-0.00856966	2.71518302	0.968627453	0	30.1975	977.3984	655.7384	3.754	0.7448	258	3.53879001	0.008174605	7.651312406	0.017674532
11.34925323	×ÔÉí³µÁ¾	Road 1	13.12330475	30.12801361	-0.00856966	2.712832451	0.97647059	0	30.3144	977.4014	655.7384	3.7532	0.7446	259	2.593123974	0.005990116	7.694376916	0.017774011
11.36588279	×ÔÉí³µÁ¾	Road 1	13.26308337	30.25956459	-0.00856966	2.713185072	0.97647059	0	30.4317	977.4053	655.7385	3.7514	0.7464	260	2.599515948	0.006004882	7.737605704	0.017873869
11.38255853	×ÔÉí³µÁ¾	Road 1	13.40420798	30.46633072	-0.00856966	2.713428259	0.97647059	0	30.6172	977.4111	655.7385	3.7489	0.7479	261	3.790463719	0.008755971	7.800814487	0.018019881
11.39927055	×ÔÉí³µÁ¾	Road 1	13.54625067	30.5979435	-0.00856966	2.71432209	0.97647059	0	30.7359	977.415	655.7385	3.7462	0.7496	262	2.615953299	0.006042852	7.844532372	0.01812087
11.44927944	×ÔÉí³µÁ¾	Road 1	13.97639443	30.96484566	-0.00856966	2.716843605	0.97647059	0	31.0521	977.4248	655.7386	3.7422	0.7517	263	2.492498655	0.005757672	7.969179461	0.018408805
11.46594235	×ÔÉí³µÁ¾	Road 1	14.12098081	31.23770142	-0.00856966	2.715428352	0.97647059	0	31.3197	977.4336	655.7386	3.7383	0.7546	264	4.94418401	0.011421065	8.051563951	0.018599113
11.48252352	×ÔÉí³µÁ¾	Road 1	14.26546441	31.36937943	-0.00856966	2.715673923	0.984313726	0	31.4414	977.4375	655.7386	3.7366	0.7563	265	2.692332035	0.006219287	8.096205959	0.018702236
11.49921282	×ÔÉí³µÁ¾	Road 1	14.41176268	31.55756836	-0.00856966	2.716951847	0.984313726	0	31.5724	977.4414	655.7387	3.735	0.7569	266	3.611472212	0.008342501	8.156478908	0.018841466
11.51589296	×ÔÉí³µÁ¾	Road 1	14.55863525	31.69885597	-0.00856966	2.720414877	0.984313726	0	31.7479	977.4473	655.7388	3.7324	0.7595	267	2.861765899	0.006610679	8.204213557	0.018951733
11.53257016	×ÔÉí³µÁ¾	Road 1	14.706137	31.84024315	-0.00856966	2.722103596	0.984313726	0	31.8802	977.4512	655.7388	3.7299	0.7601	268	2.875259629	0.00664185	8.252164852	0.019062501
11.54924444	×ÔÉí³µÁ¾	Road 1	14.85422451	31.97231255	-0.00856966	2.724620819	0.984313726	0	32.0042	977.4561	655.7388	3.7272	0.7627	269	2.73263243	0.006312381	8.29772951	0.019167755
11.56587619	×ÔÉí³µÁ¾	Road 1	15.00285035	32.17057457	-0.00856966	2.726475477	0.984313726	0	32.1913	977.4619	655.7388	3.7248	0.7642	270	3.854162482	0.008903115	8.361830985	0.01931583
11.58257612	×ÔÉí³µÁ¾	Road 1	15.15269894	32.30282249	-0.00856966	2.726952314	0.984313726	0	32.3166	977.4658	655.7389	3.7231	0.7658	271	2.757407962	0.006369612	8.40787951	0.019422202
11.59916645	×ÔÉí³µÁ¾	Road 1	15.30217343	32.43504639	-0.00856966	2.726288557	0.984313726	0	32.4424	977.4697	655.7389	3.7215	0.7664	272	2.781715214	0.006425762	8.454029087	0.019528807
11.61584036	×ÔÉí³µÁ¾	Road 1	15.45331933	32.63333931	-0.00856966	2.725658894	0.984313726	0	32.6321	977.4766	655.739	3.7181	0.7698	273	3.897481097	0.009003181	8.519015321	0.019678925
11.63252526	×ÔÉí³µÁ¾	Road 1	15.60517754	32.765522	-0.00856966	2.725972176	0.984313726	0	32.7592	977.4805	655.739	3.7165	0.7704	274	2.793585364	0.006453182	8.565626021	0.019786596
11.64923142	×ÔÉí³µÁ¾	Road 1	15.75814911	32.96374283	-0.00856966	2.724205017	0.984313726	0	32.9508	977.4873	655.739	3.7132	0.7728	275	3.926264101	0.00906967	8.63121883	0.019938115
11.66586647	×ÔÉí³µÁ¾	Road 1	15.91112338	33.10523987	-0.00856966	2.723064661	0.984313726	0	33.0884	977.4922	655.7391	3.7098	0.7752	276	2.985793685	0.006897183	8.680887661	0.02005285
11.68253122	×ÔÉí³µÁ¾	Road 1	16.06493802	33.22779922	-0.00856966	2.721450806	0.984313726	0	33.2081	977.4961	655.7391	3.7081	0.776	277	2.666390804	0.006159363	8.725322376	0.020155495
11.69973956	×ÔÉí³µÁ¾	Road 1	16.22480604	33.44452171	-0.00856966	2.720435858	0.984313726	0	33.421	977.5029	655.7391	3.7051	0.7789	278	4.188342888	0.009675072	8.797396826	0.020321987
11.71589003	×ÔÉí³µÁ¾	Road 1	16.37543779	33.57639198	-0.00856966	2.719444513	0.984313726	0	33.5513	977.5078	655.7392	3.7026	0.7805	279	2.925736517	0.006758451	8.844648828	0.020431139
11.73266877	×ÔÉí³µÁ¾	Road 1	16.53249975	33.69877625	-0.00856966	2.71804142	0.984313726	0	33.6727	977.5117	655.7392	3.7009	0.7822	280	2.682434316	0.006196423	8.889656699	0.020535107
11.74922867	×ÔÉí³µÁ¾	Road 1	16.68846515	33.9057106	-0.008588844	2.715274811	0.984313726	0	33.8792	977.5195	655.7393	3.6968	0.7852	281	4.214050507	0.009734457	8.959440984	0.020696309
11.76594473	×ÔÉí³µÁ¾	Road 1	16.84655592	34.04670639	-0.008642713	2.714115858	0.984313726	0	34.0207	977.5244	655.7393	3.6945	0.7875	282	3.041432137	0.007025708	9.010281747	0.020813751
11.78266629	×ÔÉí³µÁ¾	Road 1	17.00530973	34.17825737	-0.008727818	2.713320255	0.984313726	0	34.1533	977.5293	655.7393	3.692	0.789	283	2.885060112	0.006664489	9.058524448	0.020925191
11.79922034	×ÔÉí³µÁ¾	Road 1	17.16333678	34.36606865	-0.008852601	2.711317539	0.984313726	0	34.3436	977.5361	655.7394	3.6877	0.7914	284	3.927545953	0.009072631	9.12354121	0.02107538
11.81590707	×ÔÉí³µÁ¾	Road 1	17.32328293	34.50681725	-0.009010245	2.709248543	0.984313726	0	34.487	977.541	655.7394	3.6854	0.7937	285	3.078561319	0.007111477	9.174912349	0.021194048
11.83267775	×ÔÉí³µÁ¾	Road 1	17.48495096	34.70372314	-0.009209919	2.707024813	0.984313726	0	34.6888	977.5479	655.7395	3.6822	0.7959	286	4.081181161	0.009427528	9.24335652	0.021352154
11.84921493	×ÔÉí³µÁ¾	Road 1	17.64497068	34.83489647	-0.00941252	2.706141472	0.984313726	0	34.8239	977.5527	655.7395	3.6798	0.7983	287	2.954317282	0.006824473	9.292212598	0.021465011
11.86583532	×ÔÉí³µÁ¾	Road 1	17.80640096	34.96602859	-0.009655385	2.705234051	0.984313726	0	34.9596	977.5576	655.7396	3.6774	0.7998	288	2.951602724	0.006818202	9.341269384	0.021578332
11.8825763	×ÔÉí³µÁ¾	Road 1	17.96991651	35.16256371	-0.009974338	2.702696562	0.984313726	0	35.164	977.5654	655.7396	3.6733	0.8029	289	4.130923975	0.009542434	9.410425124	0.021738082
11.89993054	×ÔÉí³µÁ¾	Road 1	18.14009821	35.30286255	-0.010265604	2.701806545	0.984313726	0	35.3107	977.5703	655.7396	3.671	0.8051	290	3.036122603	0.007013443	9.463114707	0.021859795
11.91583797	×ÔÉí³µÁ¾	Road 1	18.29667047	35.43374748	-0.010584539	2.700512171	0.984313726	0	35.4482	977.5752	655.7397	3.6677	0.8065	291	3.090472567	0.007138992	9.512276205	0.021973358
11.93262075	×ÔÉí³µÁ¾	Road 1	18.46277304	35.6299427	-0.01094608	2.698395014	0.984313726	0	35.6553	977.583	655.7397	3.6636	0.8105	292	4.166799638	0.009625307	9.582206659	0.022134897
11.94916856	×ÔÉí³µÁ¾	Road 1	18.62715085	35.76062851	-0.011278885	2.696445465	0.984313726	0	35.7941	977.5889	655.7398	3.6603	0.8129	293	3.014331588	0.006963106	9.632087248	0.022250122
11.965841	×ÔÉí³µÁ¾	Road 1	18.79341485	35.90058746	-0.011604285	2.695708752	0.984313726	0	35.9433	977.5938	655.7399	3.6581	0.8151	294	3.178600518	0.007342567	9.685082274	0.02237254
11.98257539	×ÔÉí³µÁ¾	Road 1	18.96120692	36.09641876	-0.011974178	2.693909645	0.984313726	0	36.1532	977.6016	655.7399	3.654	0.8181	295	4.221322856	0.009751256	9.755723528	0.022535721
11.99916572	×ÔÉí³µÁ¾	Road 1	19.1281558	36.22688141	-0.012332291	2.692349195	0.984313726	0	36.2937	977.6074	655.74	3.6507	0.8204	296	3.039258172	0.007020686	9.806145829	0.022652197
12.0159045	×ÔÉí³µÁ¾	Road 1	19.2972482	36.36659317	-0.012722406	2.690982819	0.984313726	0	36.4449	977.6133	655.74	3.6476	0.8235	297	3.200971623	0.007394244	9.859726209	0.022775968
12.0326081	×ÔÉí³µÁ¾	Road 1	19.46684882	36.55273933	-0.013192093	2.689152002	0.984313726	0	36.6473	977.6211	655.7401	3.6425	0.8267	298	4.095614087	0.009460869	9.928137697	0.022933998
12.04917167	×ÔÉí³µÁ¾	Road 1	19.63562685	36.68296165	-0.013647043	2.687482834	0.984313726	0	36.7896	977.627	655.7401	3.6392	0.829	299	3.073236894	0.007099177	9.97904148	0.023051586
12.08261589	×ÔÉí³µÁ¾	Road 1	19.97926192	36.98954201	-0.014171228	2.681519032	0.97647059	0	37.127	977.6396	655.7402	3.6326	0.8345	300	3.505874223	0.008098569	10.0962927	0.023322436
12.09919743	×ÔÉí³µÁ¾	Road 1	20.15040321	37.15631104	-0.014774719	2.675965071	0.97647059	0	37.2814	977.6465	655.7403	3.6285	0.8376	301	3.811253548	0.008803996	10.15948913	0.02346842
12.11585594	×ÔÉí³µÁ¾	Road 1	20.32310875	37.32266121	-0.015974479	2.669072866	0.97647059	0	37.4984	977.6543	655.7404	3.6246	0.8405	302	3.803975914	0.008787184	10.2228577	0.023614801
12.13263614	×ÔÉí³µÁ¾	Road 1	20.49767794	37.4518055	-0.016657619	2.664977551	0.97647059	0	37.6437	977.6611	655.7404	3.6194	0.8447	303	3.077939312	0.00711004	10.27450616	0.023734109
12.14923674	×ÔÉí³µÁ¾	Road 1	20.67127007	37.64513741	-0.017231381	2.659503937	0.97647059	0	37.8625	977.6699	655.7405	3.6146	0.8475	304	4.371867551	0.010099014	10.34708176	0.023901759
12.16582157	×ÔÉí³µÁ¾	Road 1	20.84533256	37.78301239	-0.017811922	2.656829119	0.97647059	0	38.0196	977.6758	655.7405	3.6116	0.8505	305	3.303378477	0.007630804	10.40186774	0.024028314
12.18257612	×ÔÉí³µÁ¾	Road 1	21.02181735	37.92076378	-0.018437289	2.653985262	0.97647059	0	38.1772	977.6826	655.7406	3.6076	0.8535	306	3.284391441	0.007586944	10.45689624	0.02415543
12.19981489	×ÔÉí³µÁ¾	Road 1	21.20428103	38.10418396	-0.018985759	2.650538683	0.97647059	0	38.3882	977.6914	655.7407	3.6016	0.8575	307	4.091630161	0.009451666	10.52743091	0.024318365
12.21590927	×ÔÉí³µÁ¾	Road 1	21.37520539	38.23245621	-0.019458767	2.649012566	0.97647059	0	38.5365	977.6982	655.7407	3.5974	0.8607	308	3.226266146	0.007452675	10.57935566	0.024438312
12.23314437	×ÔÉí³µÁ¾	Road 1	21.55885814	38.36065636	-0.019973245	2.64677906	0.97647059	0	38.6853	977.7051	655.7408	3.5933	0.8638	309	3.060130106	0.007068901	10.63209732	0.024560145
12.24916104	×ÔÉí³µÁ¾	Road 1	21.73042288	38.56188812	-0.020359879	2.644253492	0.97647059	0	38.9201	977.7148	655.7409	3.5878	0.8683	310	4.775930229	0.011032399	10.70859183	0.024736847
12.26790196	×ÔÉí³µÁ¾	Road 1	21.93183512	38.68989258	-0.020710016	2.643605947	0.97647059	0	39.0702	977.7217	655.741	3.5836	0.8714	311	2.880873842	0.006654819	10.76258204	0.024861565
12.28382479	×ÔÉí³µÁ¾	Road 1	22.103769	38.87260551	-0.020973496	2.640725374	0.97647059	0	39.2855	977.7314	655.741	3.5768	0.8753	312	4.448116688	0.01027515	10.83340866	0.025025174
12.30011345	×ÔÉí³µÁ¾	Road 1	22.28027252	39.00952263	-0.02114105	2.63974762	0.97647059	0	39.4476	977.7383	655.7411	3.5729	0.8782	313	3.432149347	0.007928265	10.88931376	0.025154315
12.31582991	×ÔÉí³µÁ¾	Road 1	22.45109373	39.12816811	-0.0212673	2.638906956	0.97647059	0	39.5886	977.7451	655.7411	3.5686	0.8815	314	3.153155164	0.007283788	10.9388702	0.02526879
12.33258226	×ÔÉí³µÁ¾	Road 1	22.63406532	39.3197216	-0.021309495	2.636824131	0.97647059	0	39.8171	977.7559	655.7413	3.561	0.8871	315	4.481774466	0.010352899	11.01395045	0.025442226
12.35049696	×ÔÉí³µÁ¾	Road 1	22.83063932	39.50199852	-0.021309495	2.635066986	0.97647059	0	40.0359	977.7656	655.7414	3.5552	0.891	316	4.07261963	0.009407751	11.0869102	0.025610763
12.36607303	×ÔÉí³µÁ¾	Road 1	23.00210396	39.62955322	-0.021337656	2.634547949	0.97647059	0	40.1896	977.7734	655.7415	3.5501	0.895	317	3.408315271	0.007873208	11.13999836	0.025733396
12.38249658	×ÔÉí³µÁ¾	Road 1	23.18347948	39.75705299	-0.021337656	2.633656979	0.97647059	0	40.3438	977.7813	655.7415	3.5451	0.899	318	3.272230772	0.007558853	11.19374	0.025857539
12.3992394	×ÔÉí³µÁ¾	Road 1	23.36918513	39.92997437	-0.021337656	2.631428242	0.97647059	0	40.4985	977.7881	655.7416	3.5401	0.9011	319	4.166803895	0.009625317	11.26350405	0.026018694
12.41583413	×ÔÉí³µÁ¾	Road 1	23.5539192	40.07553291	-0.021337656	2.631472588	0.97647059	0	40.7315	977.7998	655.7417	3.5325	0.9076	320	3.643986483	0.008417609	11.32397502	0.026158382
12.43254835	×ÔÉí³µÁ¾	Road 1	23.74049022	40.18466835	-0.021337656	2.629971266	0.97647059	0	40.8651	977.8066	655.7418	3.5281	0.911	321	2.876997532	0.006645864	11.37206181	0.026269463
12.44916801	×ÔÉí³µÁ¾	Road 1	23.92688675	40.3755352	-0.021337656	2.628050327	0.97647059	0	41.0998	977.8184	655.7419	3.5197	0.9165	322	4.611749101	0.01065314	11.44870749	0.026446514
12.46590423	×ÔÉí³µÁ¾	Road 1	24.11518186	40.50271568	-0.021337656	2.627396822	0.97647059	0	41.2569	977.8262	655.7419	3.5147	0.9205	323	3.270713975	0.007555349	11.50344688	0.026572962
12.48250959	×ÔÉí³µÁ¾	Road 1	24.30259116	40.62986183	-0.021309495	2.626533031	0.97647059	0	41.4145	977.834	655.7421	3.5097	0.9244	324	3.300323374	0.007623747	11.55824994	0.026699557
12.49931399	×ÔÉí³µÁ¾	Road 1	24.49322126	40.83861237	-0.021309495	2.624557018	0.97647059	0	41.6744	977.8477	655.7422	3.4997	0.9314	325	4.990610611	0.011528311	11.64211416	0.026893284
12.51579912	×ÔÉí³µÁ¾	Road 1	24.68081112	40.96561432	-0.021309495	2.623822927	0.97647059	0	41.8333	977.8555	655.7422	3.4948	0.9344	326	3.341804271	0.007719568	11.69720423	0.027020542
12.53263028	×ÔÉí³µÁ¾	Road 1	24.87293205	41.09255791	-0.02128136	2.622585535	0.97647059	0	41.9926	977.8643	655.7424	3.4889	0.9393	327	3.293856409	0.007608808	11.75264365	0.027148607
12.54924554	×ÔÉí³µÁ¾	Road 1	25.06350877	41.29193916	-0.0212673	2.621659756	0.97647059	0	42.244	977.877	655.7425	3.4797	0.9455	328	4.892909058	0.01130262	11.8339406	0.027336403
12.56585456	×ÔÉí³µÁ¾	Road 1	25.25459916	41.41876945	-0.021183079	2.619797707	0.97647059	0	42.4047	977.8857	655.7426	3.4738	0.9503	329	3.351272074	0.007741438	11.88960196	0.027464981
12.58262267	×ÔÉí³µÁ¾	Road 1	25.4484054	41.60888786	-0.021071129	2.618555307	0.97647059	0	42.6465	977.8984	655.7427	3.4645	0.9567	330	4.691295848	0.010836893	11.96826613	0.027646695
12.59974084	×ÔÉí³µÁ¾	Road 1	25.6468601	41.73558426	-0.020973496	2.618061543	0.97647059	0	42.8083	977.9072	655.7428	3.4587	0.9615	331	3.290036503	0.007599984	12.02458554	0.027776793
12.68264632	×ÔÉí³µÁ¾	Road 1	26.62360686	42.41322441	-0.020779138	2.611440659	0.97647059	0	43.6837	977.9561	655.7433	3.4237	0.9876	332	3.601867866	0.008320315	12.32320009	0.028466592
12.69919779	×ÔÉí³µÁ¾	Road 1	26.81968573	42.64779282	-0.020489857	2.611322165	0.97647059	0	43.9904	977.9736	655.7435	3.4116	0.9976	333	5.840609296	0.013491807	12.4198708	0.028689902
12.71617117	×ÔÉí³µÁ¾	Road 1	27.02140046	42.78304825	-0.017918287	2.610868931	0.97647059	0	44.1681	977.9844	655.7436	3.4041	1.0032	334	3.574359805	0.008256771	12.48053978	0.028830047
12.73259546	×ÔÉí³µÁ¾	Road 1	27.21716545	42.90927086	-0.017115591	2.610540867	0.97647059	0	44.3344	977.9932	655.7437	3.3973	1.008	335	3.479350894	0.008037301	12.53768561	0.028962054
12.74918542	×ÔÉí³µÁ¾	Road 1	27.41577759	43.09856873	-0.016378529	2.609520912	0.97647059	0	44.5849	978.0078	655.7438	3.3872	1.0161	336	4.875752611	0.011262989	12.61857418	0.029148906
12.76587875	×ÔÉí³µÁ¾	Road 1	27.61621214	43.22470207	-0.01566294	2.608484745	0.97647059	0	44.7525	978.0176	655.744	3.3804	1.0218	337	3.454560511	0.007980035	12.67624231	0.02928212
12.78261131	×ÔÉí³µÁ¾	Road 1	27.81799646	43.41378365	-0.014879707	2.607256413	0.97647059	0	45.0048	978.0332	655.7441	3.3684	1.0309	338	4.868056801	0.011245211	12.75769734	0.029470281
12.79917781	×ÔÉí³µÁ¾	Road 1	28.01835821	43.53980026	-0.014171228	2.606721878	0.97647059	0	45.1736	978.043	655.7443	3.3617	1.0366	339	3.496677128	0.008077324	12.81562506	0.029604094
12.81587151	×ÔÉí³µÁ¾	Road 1	28.22084248	43.66577568	-0.013480416	2.606122971	0.97647059	0	45.3429	978.0527	655.7444	3.355	1.0423	340	3.483170147	0.008046123	12.87377206	0.029738413
12.83247174	×ÔÉí³µÁ¾	Road 1	28.42285659	43.80968628	-0.012697474	2.605619192	0.97647059	0	45.5126	978.0625	655.7444	3.3473	1.047	341	3.917527312	0.009049488	12.9388039	0.029888637
12.84969365	×ÔÉí³µÁ¾	Road 1	28.63325324	43.98048935	-0.011978971	2.603162289	0.97647059	0	45.7682	978.0781	655.7446	3.3363	1.057	342	4.404283312	0.010173894	13.01465406	0.030063851
12.86604719	×ÔÉí³µÁ¾	Road 1	28.83361216	44.10618668	-0.01128349	2.599903822	0.97647059	0	45.9392	978.0889	655.7448	3.3286	1.0637	343	3.568598728	0.008243463	13.07301327	0.030198661
12.88263679	×ÔÉí³µÁ¾	Road 1	29.0377303	44.29434128	-0.010496512	2.593452215	0.97647059	0	46.1966	978.1045	655.7449	3.3167	1.0727	344	4.976794966	0.011496396	13.1555763	0.030389381
12.8991571	×ÔÉí³µÁ¾	Road 1	29.24157047	44.41951675	-0.009830794	2.589542389	0.97647059	0	46.3688	978.1143	655.745	3.3101	1.0783	345	3.550011418	0.008200526	13.21422362	0.030524857
12.91582515	×ÔÉí³µÁ¾	Road 1	29.44810126	44.60697098	-0.009209919	2.5857234	0.97647059	0	46.628	978.1299	655.7452	3.2992	1.0873	346	4.973206224	0.011488106	13.29711723	0.030716341
12.93258043	×ÔÉí³µÁ¾	Road 1	29.65629391	44.7317791	-0.008554333	2.58360076	0.97647059	0	46.8014	978.1406	655.7453	3.2916	1.0949	347	3.523418061	0.008139096	13.35615309	0.030852714
12.94919458	×ÔÉí³µÁ¾	Road 1	29.86330867	44.85651169	-0.008021994	2.582957029	0.97647059	0	46.9753	978.1514	655.7454	3.283	1.1015	348	3.555153536	0.008212405	13.41521897	0.030989156
12.96582487	×ÔÉí³µÁ¾	Road 1	30.07138827	45.04351616	-0.007540339	2.58176136	0.97647059	0	47.2371	978.168	655.7456	3.2712	1.1113	349	5.018464125	0.011592652	13.49867747	0.031181945
12.98250281	×ÔÉí³µÁ¾	Road 1	30.28064162	45.16817665	-0.007048027	2.582434177	0.97647059	0	47.4122	978.1777	655.7457	3.2646	1.1179	350	3.564924167	0.008234975	13.55813305	0.031319287
12.99921044	×ÔÉí³µÁ¾	Road 1	30.49084614	45.29285774	-0.006635648	2.582838535	0.97647059	0	47.5877	978.1895	655.7458	3.256	1.1255	351	3.569236875	0.008244937	13.61776654	0.031457041
13.01580517	×ÔÉí³µÁ¾	Road 1	30.70053359	45.48882637	-0.006252097	2.58386302	0.97647059	0	47.8646	978.2061	655.746	3.2435	1.136	352	5.286112047	0.012210919	13.70548814	0.031659678
13.03259564	×ÔÉí³µÁ¾	Road 1	30.91327624	45.61358299	-0.005847884	2.585126162	0.97647059	0	48.0415	978.2168	655.7462	3.236	1.1426	353	3.579689787	0.008269083	13.76559282	0.031798519
13.0492043	×ÔÉí³µÁ¾	Road 1	31.12429103	45.73838425	-0.005509892	2.585776567	0.97647059	0	48.2188	978.2275	655.7463	3.2284	1.1491	354	3.621839699	0.00836645	13.82574672	0.031937475
13.06581956	×ÔÉí³µÁ¾	Road 1	31.33625386	45.92563248	-0.005201655	2.586672068	0.97647059	0	48.4856	978.2441	655.7465	3.2167	1.1599	355	5.120874333	0.01182922	13.91083136	0.03213402
13.08247807	×ÔÉí³µÁ¾	Road 1	31.54934633	46.05050926	-0.004862965	2.587538242	0.97647059	0	48.6642	978.2559	655.7466	3.2082	1.1684	356	3.63739868	0.008402391	13.97142501	0.032273992
13.09917726	×ÔÉí³µÁ¾	Road 1	31.76382854	46.23790512	-0.004587162	2.588477612	0.97647059	0	48.9328	978.2725	655.7468	3.1965	1.1791	357	5.134643934	0.011861027	14.05716945	0.032472061
13.11588636	×ÔÉí³µÁ¾	Road 1	31.97901787	46.36286774	-0.00432685	2.589351177	0.97647059	0	49.1126	978.2832	655.7469	3.188	1.1866	358	3.653035613	0.008438512	14.11820837	0.032613061
13.13262002	×ÔÉí³µÁ¾	Road 1	32.19514601	46.49679451	-0.004055586	2.590482235	0.97647059	0	49.3057	978.2949	655.747	3.1798	1.1938	359	3.872984954	0.008946595	14.18301756	0.032762771
13.14917149	×ÔÉí³µÁ¾	Road 1	32.40953707	46.63968887	-0.003818226	2.590852976	0.97647059	0	49.4864	978.3066	655.7471	3.1714	1.2022	360	4.137094861	0.009556689	14.25149259	0.032920948
13.16579665	×ÔÉí³µÁ¾	Road 1	32.62546006	46.75582466	-0.003644247	2.591608524	0.97647059	0	49.6806	978.3184	655.7473	3.1632	1.2094	361	3.482749582	0.008045152	14.30939384	0.0330547
13.18255853	×ÔÉí³µÁ¾	Road 1	32.84415739	46.97029152	-0.003467239	2.592357397	0.97647059	0	49.9924	978.3379	655.7475	3.1493	1.2233	362	5.847130116	0.013506871	14.40740273	0.0332811
13.20021773	×ÔÉí³µÁ¾	Road 1	33.07513233	47.08646851	-0.003334734	2.593217611	0.97647059	0	50.1489	978.3477	655.7476	3.1424	1.2292	363	3.339984871	0.007715365	14.46638422	0.033417348
13.21627583	×ÔÉí³µÁ¾	Road 1	33.28600295	47.27424889	-0.0032216	2.594107628	0.97647059	0	50.4367	978.3652	655.7478	3.13	1.2416	364	5.435625915	0.012556296	14.55367	0.033618978
13.23332509	×ÔÉí³µÁ¾	Road 1	33.51048227	47.39945183	-0.003136487	2.594531298	0.97647059	0	50.6204	978.377	655.7479	3.1216	1.249	365	3.672810842	0.008484193	14.61628871	0.033763627
13.24955876	×ÔÉí³µÁ¾	Road 1	33.72478789	47.5246891	-0.003103255	2.595691681	0.97647059	0	50.8046	978.3887	655.748	3.1133	1.2574	366	3.833928337	0.008856374	14.67852744	0.033907398
13.26580159	×ÔÉí³µÁ¾	Road 1	33.94006235	47.71260681	-0.003085757	2.596481562	0.97647059	0	51.0026	978.4014	655.7482	3.1042	1.2664	367	5.432073358	0.012548089	14.76675972	0.034111215
13.28245864	×ÔÉí³µÁ¾	Road 1	34.16144774	47.84686661	-0.003085757	2.596989393	0.97647059	0	51.2806	978.418	655.7484	3.0917	1.277	368	4.000306989	0.009240709	14.83339301	0.034265138
13.29918863	×ÔÉí³µÁ¾	Road 1	34.38442677	47.99013519	-0.003085757	2.59798646	0.97647059	0	51.4666	978.4297	655.7485	3.0833	1.2853	369	4.219454924	0.009746941	14.90398445	0.034428204
13.31579289	×ÔÉí³µÁ¾	Road 1	34.60659759	48.16926041	-0.003087698	2.598650932	0.97647059	0	51.7598	978.4482	655.7487	3.0701	1.2986	370	5.157063473	0.011912817	14.98961367	0.034626008
13.33251445	×ÔÉí³µÁ¾	Road 1	34.83092047	48.29468307	-0.003113005	2.59980917	0.97647059	0	51.947	978.46	655.7488	3.0618	1.3069	371	3.802045331	0.008782725	15.05318979	0.034772868
13.34919898	×ÔÉí³µÁ¾	Road 1	35.05532817	48.42014694	-0.003134525	2.600108385	0.97647059	0	52.1347	978.4717	655.749	3.0535	1.3142	372	3.81913979	0.008822213	15.11691037	0.034920063
13.36577685	×ÔÉí³µÁ¾	Road 1	35.2791679	48.60836334	-0.00314434	2.601079226	0.97647059	0	52.4172	978.4902	655.7491	3.0401	1.3276	373	5.438111194	0.012562037	15.20706266	0.035128315
13.38252627	×ÔÉí³µÁ¾	Road 1	35.50590796	48.73388901	-0.003152207	2.602041721	0.97647059	0	52.6061	978.502	655.7493	3.0319	1.3359	374	3.831266732	0.008850226	15.27123415	0.035276551
13.39913236	×ÔÉí³µÁ¾	Road 1	35.73128688	48.85942154	-0.003152207	2.601605177	0.97647059	0	52.7955	978.5137	655.7494	3.0236	1.3442	375	3.867823776	0.008934673	15.33546359	0.035424921
13.41583449	×ÔÉí³µÁ¾	Road 1	35.95888489	49.05678406	-0.003152207	2.603360891	0.97647059	0	53.0941	978.5322	655.7496	3.0105	1.3563	376	5.681096756	0.013123334	15.43035001	0.035644109
13.4324996	×ÔÉí³µÁ¾	Road 1	36.18647694	49.16447754	-0.003152207	2.604361057	0.97647059	0	53.2575	978.543	655.7498	3.0027	1.3641	377	3.425036641	0.007911835	15.48742862	0.03577596
13.44912952	×ÔÉí³µÁ¾	Road 1	36.41429322	49.3170536	-0.003152207	2.604656219	0.97647059	0	53.4623	978.5557	655.7499	2.9938	1.3731	378	4.587795298	0.010597807	15.56372328	0.035952201
13.46584925	×ÔÉí³µÁ¾	Road 1	36.64413203	49.48763695	-0.003152207	2.606447935	0.97647059	0	53.7499	978.5742	655.7501	2.9804	1.3864	379	5.04070517	0.011644029	15.64800249	0.036146886
13.48256641	×ÔÉí³µÁ¾	Road 1	36.87481142	49.67624817	-0.00314434	2.606370211	0.97647059	0	54.0385	978.5918	655.7503	2.9681	1.3978	380	5.520759818	0.012752955	15.74029392	0.036360079
13.51589149	×ÔÉí³µÁ¾	Road 1	37.33707475	49.93679581	-0.003136487	2.608515739	0.97647059	0	54.439	978.6172	655.7506	2.95	1.4159	381	4.053630004	0.009363885	15.87538148	0.036672131
13.53389087	×ÔÉí³µÁ¾	Road 1	37.58769369	50.12553406	-0.003136487	2.608116388	0.97647059	0	54.7303	978.6357	655.7508	2.9368	1.4291	382	5.223600773	0.012066518	15.96940302	0.036889321
13.54927853	×ÔÉí³µÁ¾	Road 1	37.80248543	50.25132065	-0.003136487	2.607099533	0.97647059	0	54.9251	978.6484	655.7509	2.9277	1.4373	383	4.236350669	0.00978597	16.03459055	0.037039904
13.56593484	×ÔÉí³µÁ¾	Road 1	38.03556789	50.37711067	-0.003136487	2.608565331	0.984313726	0	55.1204	978.6611	655.7511	2.9185	1.4464	384	3.975579597	0.009183589	16.10080904	0.037192869
13.58247458	×ÔÉí³µÁ¾	Road 1	38.26792796	50.57491264	-0.003136487	2.609332085	0.984313726	0	55.4282	978.6807	655.7513	2.9036	1.4603	385	5.91010794	0.013652349	16.19856073	0.037418675
13.59917745	×ÔÉí³µÁ¾	Road 1	38.50316427	50.70092926	-0.003134525	2.613603115	0.984313726	0	55.6248	978.6934	655.7515	2.8944	1.4695	386	3.995950447	0.009230646	16.26530455	0.037572854
13.61578244	×ÔÉí³µÁ¾	Road 1	38.73760421	50.82710724	-0.003134525	2.617363691	0.984313726	0	55.8218	978.7061	655.7516	2.8853	1.4786	387	4.028924848	0.009306816	16.33220482	0.037727393
13.63245195	×ÔÉí³µÁ¾	Road 1	38.97387412	51.02560272	-0.003134525	2.618800402	0.984313726	0	56.0193	978.7188	655.7517	2.8762	1.4867	388	5.937495515	0.013715615	16.43117994	0.037956026
13.64918487	×ÔÉí³µÁ¾	Road 1	39.21163035	51.15200043	-0.003134525	2.620936632	0.984313726	0	56.3307	978.7383	655.752	2.8623	1.5007	389	4.032928052	0.009316064	16.49866261	0.038111911
13.66577887	×ÔÉí³µÁ¾	Road 1	39.44799544	51.27844276	-0.003134525	2.621141434	0.984313726	0	56.5295	978.751	655.7521	2.8531	1.5098	390	4.071344978	0.009404807	16.5662225	0.038267974
13.68247147	×ÔÉí³µÁ¾	Road 1	39.6863932	51.41391449	-0.003134525	2.620836973	0.984313726	0	56.743	978.7646	655.7522	2.8433	1.5197	391	4.301074138	0.009935481	16.63801861	0.038433823
13.69909992	×ÔÉí³µÁ¾	Road 1	39.92479225	51.61253357	-0.003134525	2.620047569	0.984313726	0	57.0572	978.7852	655.7524	2.8285	1.5336	392	6.018849604	0.013903543	16.73810277	0.038665017
13.71580608	×ÔÉí³µÁ¾	Road 1	40.16489177	51.73888664	-0.003134525	2.619109869	0.992156863	0	57.2577	978.7979	655.7526	2.8194	1.5427	393	4.08001629	0.009424838	16.80626419	0.03882247
13.73376734	×ÔÉí³µÁ¾	Road 1	40.42370484	51.87428284	-0.003134525	2.620027781	0.992156863	0	57.4732	978.8115	655.7527	2.8096	1.5525	394	4.078420597	0.009421152	16.87951773	0.038991686
13.74957067	×ÔÉí³µÁ¾	Road 1	40.65229594	52.07305641	-0.003134525	2.623966217	0.992156863	0	57.7902	978.832	655.753	2.7949	1.5673	395	6.354464315	0.014678813	16.97993946	0.03922366
13.7658223	×ÔÉí³µÁ¾	Road 1	40.88795058	52.20131836	-0.003134525	2.846503496	0.992156863	0	57.9925	978.8447	655.7531	2.7858	1.5764	396	4.262007627	0.009845238	17.04920404	0.039383661
13.78245882	×ÔÉí³µÁ¾	Road 1	41.1300404	52.38616676	-0.003134525	4.289369106	0.992156863	0	58.1955	978.8584	655.7533	2.7758	1.5854	397	5.728746371	0.013233404	17.14451043	0.039603819
13.7991012	×ÔÉí³µÁ¾	Road 1	41.37319864	52.59881744	-0.003134525	4.344139576	0.992156863	0	58.3992	978.8711	655.7534	2.7668	1.5945	398	6.505543917	0.015027806	17.25277818	0.039853918
13.8158147	×ÔÉí³µÁ¾	Road 1	41.61901529	52.94763336	-0.003134525	4.320159435	0.992156863	0	58.7357	978.8936	655.7537	2.7504	1.6109	399	10.23003407	0.023631379	17.42375779	0.040248881
13.83244462	×ÔÉí³µÁ¾	Road 1	41.86444236	53.12938843	-0.003134525	4.322350025	0.992156863	0	58.9122	978.9043	655.7538	2.7429	1.6185	400	5.722801735	0.013219672	17.51892753	0.040468723
13.84912989	×ÔÉí³µÁ¾	Road 1	42.11230071	53.47771339	-0.003134525	4.315020561	0.992156863	0	59.252	978.9268	655.754	2.7265	1.6337	401	10.33251544	0.023868111	17.69132833	0.040866968
13.86609301	×ÔÉí³µÁ¾	Road 1	42.36542582	53.71950874	-0.003134525	4.310515881	0.992156863	0	59.4898	978.9424	655.7542	2.7152	1.645	402	7.320324216	0.016909949	17.81550386	0.041153814
13.88243921	×ÔÉí³µÁ¾	Road 1	42.6103071	53.93133202	-0.003134525	4.32387352	0.992156863	0	59.6987	978.9561	655.7544	2.7053	1.6549	403	6.74724303	0.015586131	17.92579568	0.041408588
13.89922822	×ÔÉí³µÁ¾	Road 1	42.86302571	54.20463066	-0.003134525	4.332051277	0.984313726	0	59.9084	978.9697	655.7545	2.6945	1.6637	404	8.327637814	0.019236843	18.06560843	0.041731555
13.91592631	×ÔÉí³µÁ¾	Road 1	43.11557114	54.44712982	-0.003134525	3.501681566	0.984313726	0	60.2246	978.9902	655.7548	2.6797	1.6785	405	7.541572001	0.017421031	18.19153834	0.042022454
13.93243161	×ÔÉí³µÁ¾	Road 1	43.36586313	54.5916584	-0.003134525	2.694592237	0.984313726	0	60.4362	979.0039	655.7549	2.6698	1.6883	406	4.850272945	0.011204131	18.27159351	0.042207381
13.94916599	×ÔÉí³µÁ¾	Road 1	43.62033286	54.74302597	-0.003134525	1.691938996	0.984313726	0	60.7544	979.0244	655.7551	2.6551	1.703	407	4.999085016	0.011547886	18.35525013	0.042400628
13.96581754	×ÔÉí³µÁ¾	Road 1	43.87395763	54.83269501	-0.003128646	2.172019005	0.984313726	0	60.9671	979.0381	655.7553	2.6453	1.7128	408	3.276154302	0.007567916	18.40980317	0.042526645
13.9826333	×ÔÉí³µÁ¾	Road 1	44.13068959	54.96241951	-0.003118864	2.739387989	0.968627453	0	61.1953	979.0537	655.7555	2.6338	1.7242	409	4.387404435	0.010134904	18.48358072	0.042697071
13.99911073	×ÔÉí³µÁ¾	Road 1	44.38286808	55.09611969	-0.003111053	2.712565422	0.960784316	0	61.4089	979.0674	655.7556	2.624	1.734	410	4.587298386	0.010596659	18.55916762	0.042871677
14.01575422	×ÔÉí³µÁ¾	Road 1	44.6384331	55.27894249	-0.003103255	2.143758059	0.952941179	0	61.7455	979.0889	655.7559	2.6086	1.7484	411	5.968847848	0.013788039	18.65851003	0.043101158
14.03265905	×ÔÉí³µÁ¾	Road 1	44.89846117	55.3747467	-0.003078002	1.943853974	0.937254906	0	61.9602	979.1035	655.756	2.5979	1.7591	412	3.440400904	0.007947326	18.71666945	0.043235506
14.0491977	×ÔÉí³µÁ¾	Road 1	45.15349437	55.51358299	-0.003054813	1.986143589	0.921568632	0	62.2829	979.125	655.7563	2.5823	1.7747	413	4.754048485	0.010981852	18.79529498	0.043417131
14.06587747	×ÔÉí³µÁ¾	Road 1	45.41114426	55.6086525	-0.003027907	2.002123594	0.905882359	0	62.4986	979.1387	655.7565	2.5725	1.7844	414	3.469261807	0.008013995	18.85316147	0.043550803
14.08247403	×ÔÉí³µÁ¾	Road 1	45.6679725	55.70922546	-0.002987845	1.946311831	0.890196085	0	62.73	979.1543	655.7566	2.5611	1.7948	415	3.648109375	0.008427133	18.91370755	0.043690664
14.09997306	×ÔÉí³µÁ¾	Road 1	45.93941377	55.84246216	-0.002946256	1.810252786	0.866666675	0	63.0547	979.1758	655.7568	2.5455	1.8104	416	4.404356689	0.010174064	18.99077949	0.043868701
14.1157478	×ÔÉí³µÁ¾	Road 1	46.18447236	55.9255291	-0.002895744	1.726867199	0.858823538	0	63.2715	979.1895	655.757	2.5358	1.8201	417	3.278093492	0.007572396	19.04249058	0.043988153
14.13243784	×ÔÉí³µÁ¾	Road 1	46.44411818	56.00497398	-0.002827467	1.661004186	0.843137264	0	63.4887	979.2041	655.7572	2.5251	1.8308	418	3.037779061	0.00701727	19.09319121	0.044105272
14.1491572	×ÔÉí³µÁ¾	Road 1	46.70474639	56.11827393	-0.002754871	1.578110456	0.843137264	0	63.815	979.2256	655.7574	2.5095	1.8453	419	4.019610583	0.0092853	19.16039653	0.044260516
14.16619839	×ÔÉí³µÁ¾	Road 1	46.97073622	56.19109268	-0.002679993	1.545240402	0.843137264	0	64.033	979.2402	655.7576	2.4988	1.856	420	2.810724047	0.006492773	19.20829462	0.044371161
14.18246945	×ÔÉí³µÁ¾	Road 1	47.22518389	56.29698029	-0.002580562	1.48438251	0.843137264	0	64.3603	979.2617	655.7578	2.4833	1.8716	421	3.901007856	0.009011328	19.27176816	0.044517784
14.19917452	×ÔÉí³µÁ¾	Road 1	47.48675443	56.36937332	-0.002492025	1.431592822	0.843137264	0	64.5946	979.2773	655.758	2.4719	1.883	422	2.848153828	0.006579235	19.31934675	0.044627691
14.21585172	×ÔÉí³µÁ¾	Road 1	47.74819153	56.43472824	-0.002397328	1.399006009	0.843137264	0	64.8134	979.292	655.7582	2.4613	1.8936	423	2.649066789	0.006119344	19.36352578	0.044729745
14.23265099	×ÔÉí³µÁ¾	Road 1	48.01184305	56.49921455	-0.002287532	1.394061565	0.850980401	0	65.0326	979.3066	655.7584	2.4506	1.9043	424	2.612640688	0.0060352	19.40741623	0.044831131
14.24919074	×ÔÉí³µÁ¾	Road 1	48.27188749	56.60062523	-0.002185763	1.392611742	0.850980401	0	65.3774	979.3291	655.7586	2.4344	1.9196	425	3.736627422	0.008631609	19.4692191	0.044973896
14.26581772	×ÔÉí³µÁ¾	Road 1	48.53359867	56.66452103	-0.00209005	1.373070955	0.850980401	0	65.5972	979.3438	655.7588	2.4228	1.9303	426	2.621504304	0.006055675	19.51280682	0.045074584
14.28245387	×ÔÉí³µÁ¾	Road 1	48.79574399	56.72725296	-0.001982688	1.349936843	0.850980401	0	65.8172	979.3584	655.7589	2.4121	1.9409	427	2.588779829	0.005980081	19.55587415	0.045174069
14.29911972	×ÔÉí³µÁ¾	Road 1	49.05880756	56.82454376	-0.001887445	1.343979239	0.850980401	0	66.1634	979.3818	655.7592	2.395	1.9581	428	3.606288845	0.008330527	19.61597599	0.045312905
14.31644902	×ÔÉí³µÁ¾	Road 1	49.33264257	56.88663368	-0.00179395	1.34974432	0.850980401	0	66.384	979.3965	655.7594	2.3843	1.9688	429	2.502911135	0.005781725	19.65934971	0.045413098
14.3324327	×ÔÉí³µÁ¾	Road 1	49.58562759	56.97974625	-0.001694469	1.346055627	0.850980401	0	66.7154	979.418	655.7596	2.3689	1.9833	430	3.609399117	0.008337712	19.7170412	0.045546365
14.3658498	×ÔÉí³µÁ¾	Road 1	50.1156788	57.10204811	-0.001616324	1.322698832	0.850980401	0	67.1581	979.4473	655.7599	2.3476	2.0046	431	2.548240309	0.005886435	19.80219598	0.045743073
14.38261534	×ÔÉí³µÁ¾	Road 1	50.38203452	57.19352303	-0.001538179	1.329712987	0.858823538	0	67.4907	979.4697	655.7602	2.3312	2.021	432	3.439453739	0.007945138	19.85986029	0.045876277
14.39913493	×ÔÉí³µÁ¾	Road 1	50.64476384	57.25479584	-0.001381561	1.3322649	0.858823538	0	67.7128	979.4844	655.7604	2.3206	2.0317	433	2.579575921	0.00595882	19.90247382	0.045974715
14.41577988	×ÔÉí³µÁ¾	Road 1	50.90979024	57.32039795	-0.001316733	1.328598142	0.858823538	0	67.9509	979.501	655.7606	2.3083	2.0439	434	2.697057713	0.006230203	19.94736621	0.046078416
14.43244975	×ÔÉí³µÁ¾	Road 1	51.17551615	57.38575287	-0.001253965	1.324468732	0.858823538	0	68.1894	979.5166	655.7607	2.297	2.0543	435	2.68952556	0.006212804	19.99220026	0.046181983
14.4491955	×ÔÉí³µÁ¾	Road 1	51.44289722	57.48155708	-0.001204589	1.328803062	0.866666675	0	68.5396	979.54	655.761	2.2799	2.0714	436	3.586693748	0.008285263	20.05226214	0.046320726
14.46579206	×ÔÉí³µÁ¾	Road 1	51.70817861	57.5428196	-0.001154511	1.333764672	0.866666675	0	68.7628	979.5547	655.7612	2.2694	2.082	437	2.58218979	0.005964858	20.09511761	0.046419722
14.48331675	×ÔÉí³µÁ¾	Road 1	51.98874388	57.63499146	-0.00110878	1.33488977	0.866666675	0	69.098	979.5771	655.7614	2.253	2.0984	438	3.365852531	0.007775119	20.15410311	0.046555978
14.49908453	×ÔÉí³µÁ¾	Road 1	52.24145051	57.69638443	-0.001070968	1.333855629	0.866666675	0	69.3217	979.5928	655.7616	2.2414	2.11	439	2.689093258	0.006211805	20.19650414	0.046653925
14.51668582	×ÔÉí³µÁ¾	Road 1	52.52397129	57.78409653	-0.001033089	1.335702658	0.866666675	0	69.6418	979.6133	655.7618	2.2267	2.1247	440	3.236035283	0.007475242	20.25346255	0.046785498
14.53240155	×ÔÉí³µÁ¾	Road 1	52.77651447	57.8500351	-0.001005274	1.338063955	0.866666675	0	69.8822	979.6299	655.7621	2.2145	2.137	441	2.846344311	0.006575055	20.29819492	0.04688883
14.54988481	×ÔÉí³µÁ¾	Road 1	53.05776024	57.91166153	-0.000980671	1.33906424	0.866666675	0	70.1068	979.6445	655.7622	2.2039	2.1466	442	2.513587101	0.005806386	20.34214062	0.046990345
14.58258052	×ÔÉí³µÁ¾	Road 1	53.58484028	58.03477707	-0.000958251	1.336549997	0.866666675	0	70.5567	979.6748	655.7626	2.1818	2.1687	443	2.63790655	0.006093564	20.42838885	0.047189578
14.59914336	×ÔÉí³µÁ¾	Road 1	53.85233147	58.14028702	-0.000932676	1.337504506	0.858823538	0	70.9431	979.7012	655.7629	2.1625	2.1881	444	3.950026259	0.009124561	20.4938125	0.047340707
14.61574322	×ÔÉí³µÁ¾	Road 1	54.12070428	58.20181732	-0.000893897	1.335869312	0.850980401	0	71.1688	979.7158	655.7631	2.152	2.1986	445	2.616074095	0.006043131	20.53723897	0.047441022
14.63339143	×ÔÉí³µÁ¾	Road 1	54.40647634	58.29369049	-0.000873662	1.327029586	0.850980401	0	71.5078	979.7393	655.7633	2.1347	2.216	446	3.373871325	0.007793643	20.59678177	0.047578566
14.65056642	×ÔÉí³µÁ¾	Road 1	54.68487611	58.35457535	-0.000852911	1.322709084	0.850980401	0	71.7342	979.7539	655.7635	2.1241	2.2265	447	2.540661544	0.005868928	20.6404176	0.047679365
14.69923078	×ÔÉí³µÁ¾	Road 1	55.47604743	58.52777481	-0.000827639	1.315901279	0.850980401	0	72.3821	979.7979	655.764	2.092	2.2587	448	2.552710138	0.00589676	20.76464361	0.047966327
14.74917699	×ÔÉí³µÁ¾	Road 1	56.29151848	58.77715073	-0.000806039	1.303241611	0.843137264	0	73.3249	979.8613	655.7647	2.0456	2.3052	449	3.287917359	0.007595089	20.92886261	0.048345673
14.79916425	×ÔÉí³µÁ¾	Road 1	57.1104387	58.97728043	-0.000745004	1.295946836	0.843137264	0	74.0919	979.9121	655.7653	2.0088	2.3411	450	2.795812783	0.006458328	21.06861764	0.048668507
14.81580773	×ÔÉí³µÁ¾	Road 1	57.38353325	59.07059555	-0.000668762	1.294027328	0.843137264	0	74.4518	979.9365	655.7656	1.9909	2.359	451	3.619326142	0.008360643	21.12885583	0.048807657
14.83256925	×ÔÉí³µÁ¾	Road 1	57.65884052	59.12987366	-0.000599207	1.292385221	0.843137264	0	74.6811	979.9521	655.7657	1.9795	2.3704	452	2.566171767	0.005927857	21.17186875	0.048907017
14.8491933	×ÔÉí³µÁ¾	Road 1	57.93218304	59.19332657	-0.000578624	1.291152835	0.843137264	0	74.9271	979.9688	655.7659	1.9673	2.3826	453	2.711887939	0.006264461	21.21695132	0.049011158
14.86574258	×ÔÉí³µÁ¾	Road 1	58.20470382	59.2820343	-0.000558518	1.289487123	0.843137264	0	75.2719	979.9922	655.7662	1.9502	2.3997	454	3.505141965	0.008096878	21.27495889	0.049145155
14.88254808	×ÔÉí³µÁ¾	Road 1	58.48173932	59.34532242	-0.000538277	1.288464546	0.843137264	0	75.5185	980.0088	655.7664	1.938	2.4119	455	2.691936093	0.006218372	21.32019822	0.049249658
14.89909259	×ÔÉí³µÁ¾	Road 1	58.75474381	59.4043602	-0.000523868	1.287519455	0.843137264	0	75.7489	980.0244	655.7665	1.9266	2.4233	456	2.593047427	0.00598994	21.36309892	0.049348759
14.91583834	×ÔÉí³µÁ¾	Road 1	59.0315002	59.49706421	-0.000512059	1.287225485	0.843137264	0	76.1114	980.0488	655.7668	1.9088	2.4411	457	3.606980079	0.008332124	21.42350051	0.049488286
14.93252764	×ÔÉí³µÁ¾	Road 1	59.30759688	59.55599899	-0.000501583	1.28591013	0.835294127	0	76.3423	980.0645	655.767	1.8973	2.4526	458	2.579804227	0.005959348	21.46655564	0.049587744
14.94920998	×ÔÉí³µÁ¾	Road 1	59.58385102	59.61484451	-0.000492963	1.283340216	0.835294127	0	76.5735	980.0801	655.7672	1.8859	2.464	459	2.580062908	0.005959945	21.50959712	0.049687169
14.9657193	×ÔÉí³µÁ¾	Road 1	59.85766278	59.70701294	-0.000483878	1.277843595	0.827450991	0	76.9373	980.1045	655.7675	1.8681	2.4818	460	3.642819748	0.008414914	21.56973761	0.049826094
14.98256292	×ÔÉí³µÁ¾	Road 1	60.13729197	59.76535721	-0.000474906	1.27223146	0.819607854	0	77.1691	980.1201	655.7676	1.8557	2.4932	461	2.553029885	0.005897499	21.61273988	0.049925429
14.99914886	×ÔÉí³µÁ¾	Road 1	60.4129106	59.82341309	-0.000464396	1.26669991	0.819607854	0	77.4011	980.1357	655.7678	1.8443	2.5046	462	2.574048121	0.005946051	21.65543287	0.05002405
15.01573589	×ÔÉí³µÁ¾	Road 1	60.68894627	59.90995789	-0.000454583	1.258102059	0.819607854	0	77.7496	980.1592	655.7681	1.8272	2.5217	463	3.465386713	0.008005043	21.71291335	0.05015683
15.03241236	×ÔÉí³µÁ¾	Road 1	60.96673619	59.96734085	-0.000444909	1.254464149	0.811764717	0	77.9821	980.1748	655.7682	1.8158	2.5331	464	2.548786408	0.005887697	21.75541811	0.050255016
15.04932013	×ÔÉí³µÁ¾	Road 1	61.24864736	60.02449036	-0.000435374	1.248998046	0.811764717	0	78.2149	980.1904	655.7684	1.8044	2.5445	465	2.519368659	0.005819742	21.79801502	0.050353415
15.06600247	×ÔÉí³µÁ¾	Road 1	61.52721357	60.11378174	-0.000422874	1.241197824	0.811764717	0	78.5812	980.2148	655.7687	1.7867	2.5623	466	3.546094252	0.008191478	21.85717215	0.050490068
15.08254844	×ÔÉí³µÁ¾	Road 1	61.80376255	60.17029266	-0.000410109	1.236799002	0.811764717	0	78.8146	980.2305	655.7689	1.7753	2.5736	467	2.543125117	0.005874619	21.89925065	0.050587269
15.09905557	×ÔÉí³µÁ¾	Road 1	62.08004932	60.25473633	-0.000396615	1.23282063	0.811764717	0	79.165	980.2539	655.7692	1.7582	2.5907	468	3.430570815	0.007924619	21.9558795	0.050718082
15.11576026	×ÔÉí³µÁ¾	Road 1	62.35990339	60.31086273	-0.000383903	1.229905128	0.811764717	0	79.3989	980.2705	655.7693	1.7459	2.6031	469	2.519475406	0.005819988	21.99796657	0.050815303
15.13241401	×ÔÉí³µÁ¾	Road 1	62.63916302	60.36687927	-0.000369106	1.227821112	0.80392158	0	79.6331	980.2861	655.7695	1.7345	2.6144	470	2.523459475	0.005829191	22.03999163	0.050912381
15.14907875	×ÔÉí³µÁ¾	Road 1	62.9189947	60.45062256	-0.000356072	1.222389936	0.80392158	0	79.9847	980.3096	655.7698	1.7174	2.6315	471	3.393570064	0.007839147	22.0965446	0.051043018
15.16586849	×ÔÉí³µÁ¾	Road 1	63.20120274	60.51011353	-0.000343348	1.217525244	0.80392158	0	80.2361	980.3262	655.77	1.7054	2.6435	472	2.622606816	0.006058222	22.14057748	0.051144734
15.18244526	×ÔÉí³µÁ¾	Road 1	63.48008595	60.56545715	-0.00032831	1.214614034	0.80392158	0	80.471	980.3428	655.7702	1.6931	2.6549	473	2.517720327	0.005815934	22.18231315	0.051241143
15.19952164	×ÔÉí³µÁ¾	Road 1	63.76776722	60.64823227	-0.000314563	1.210656166	0.796078444	0	80.8238	980.3662	655.7704	1.6759	2.6719	474	3.310567348	0.007647411	22.23884567	0.051371733
15.21666914	×ÔÉí³µÁ¾	Road 1	64.05690833	60.70320511	-0.000301206	1.206632257	0.796078444	0	81.0592	980.3818	655.7706	1.6645	2.6832	475	2.453165758	0.005666813	22.28091132	0.051468905
15.23299152	×ÔÉí³µÁ¾	Road 1	64.33250834	60.78525925	-0.000288232	1.202171445	0.796078444	0	81.4127	980.4063	655.7709	1.6464	2.7012	476	3.411748193	0.007881138	22.33659917	0.051597544
15.24904631	×ÔÉí³µÁ¾	Road 1	64.60383308	60.8397171	-0.000275249	1.197895885	0.788235307	0	81.6487	980.4219	655.7711	1.6351	2.7126	477	2.555829486	0.005903966	22.37763248	0.051692331
15.26571435	×ÔÉí³µÁ¾	Road 1	64.88577301	60.8940033	-0.000260789	1.19302547	0.78039217	0	81.8849	980.4375	655.7712	1.6237	2.7239	478	2.486783266	0.005744469	22.41908228	0.05178808
15.28243958	×ÔÉí³µÁ¾	Road 1	65.16905579	60.97484894	-0.00024865	1.186180592	0.772549033	0	82.1213	980.4541	655.7715	1.6114	2.7362	479	3.319674485	0.007668448	22.47460458	0.051916337
15.29909809	×ÔÉí³µÁ¾	Road 1	65.45149093	61.03585739	-0.000235145	1.17198813	0.764705896	0	82.5101	980.4805	655.7718	1.5921	2.7555	480	2.705512298	0.006249733	22.51967439	0.052020448
15.31578519	×ÔÉí³µÁ¾	Road 1	65.73465589	61.0887291	-0.000222811	1.163255334	0.764705896	0	82.747	980.4961	655.772	1.5808	2.7668	481	2.447104692	0.005652812	22.56050948	0.052114777
15.33239678	×ÔÉí³µÁ¾	Road 1	66.01678163	61.14120255	-0.000206726	1.155477881	0.741176486	0	82.9841	980.5117	655.7721	1.5695	2.7781	482	2.4438996	0.005645408	22.60110654	0.052208556
15.34911834	×ÔÉí³µÁ¾	Road 1	66.30115335	61.22265244	-0.000192044	1.136515379	0.725490212	0	83.3572	980.5371	655.7724	1.5509	2.7967	483	3.351607238	0.007742213	22.65715063	0.052338018
15.367062	×ÔÉí³µÁ¾	Road 1	66.60652609	61.26632309	-0.000175765	1.122218132	0.701960802	0	83.5609	980.5508	655.7726	1.5409	2.8067	484	2.064643121	0.004769326	22.69419788	0.052423597
15.3835266	×ÔÉí³µÁ¾	Road 1	66.8870855	61.34456635	-0.000156148	1.09122169	0.686274529	0	83.9347	980.5762	655.7728	1.5223	2.8253	485	3.294846137	0.007611095	22.74844621	0.052548911
15.39978153	×ÔÉí³µÁ¾	Road 1	67.16429103	61.39305038	-0.000138291	1.07074523	0.670588255	0	84.1728	980.5918	655.773	1.511	2.8366	486	2.359384422	0.005450178	22.78679785	0.052637503
15.41690924	×ÔÉí³µÁ¾	Road 1	67.45671706	61.46380234	-0.00012298	1.038405061	0.647058845	0	84.5303	980.6162	655.7733	1.4931	2.8546	487	2.970966448	0.006862932	22.83768368	0.052755049
15.43241896	×ÔÉí³µÁ¾	Road 1	67.72171586	61.5095192	-0.000107802	1.014009833	0.623529434	0	84.7689	980.6328	655.7735	1.4808	2.867	488	2.344675961	0.005416201	22.87404895	0.052839053
15.44915665	×ÔÉí³µÁ¾	Road 1	68.00790225	61.55396576	-9.45E-05	0.988357723	0.600000024	0	85.0077	980.6484	655.7737	1.4696	2.8783	489	2.190819031	0.005060792	22.9107182	0.052923759
15.46576054	×ÔÉí³µÁ¾	Road 1	68.29199973	61.59705276	-8.34E-05	0.960434377	0.58431375	0	85.2466	980.665	655.7739	1.4573	2.8906	490	2.159972821	0.004989537	22.94658216	0.053006605
15.48242418	×ÔÉí³µÁ¾	Road 1	68.57741921	61.66179657	-7.03E-05	0.913113177	0.552941203	0	85.6224	980.6904	655.7742	1.4387	2.9092	491	2.84892012	0.006581005	22.99405554	0.053116268
15.49909369	×ÔÉí³µÁ¾	Road 1	68.86312067	61.70099716	-5.94E-05	0.881972969	0.529411793	0	85.8617	980.7061	655.7744	1.4275	2.9205	492	2.03343342	0.004697231	23.02795188	0.053194569
15.51571884	×ÔÉí³µÁ¾	Road 1	69.14831997	61.75686951	-5.10E-05	0.851173818	0.513725519	0	86.221	980.7305	655.7746	1.4096	2.9384	493	2.573136027	0.005943944	23.07073066	0.053293388
15.53239165	×ÔÉí³µÁ¾	Road 1	69.43450053	61.79223862	-4.33E-05	0.807233989	0.490196079	0	86.4607	980.7471	655.7748	1.3973	2.9506	494	1.913105917	0.004419275	23.10262751	0.05336707
15.5491363	×ÔÉí³µÁ¾	Road 1	69.72207205	61.82615891	-3.71E-05	0.778192222	0.474509805	0	86.7005	980.7627	655.775	1.3861	2.9619	495	1.862925668	0.004303358	23.13382155	0.053439128
15.56570317	×ÔÉí³µÁ¾	Road 1	70.00681219	61.87435455	-3.25E-05	0.736402094	0.466666669	0	87.0605	980.7871	655.7753	1.3682	2.9797	496	2.336214365	0.005396655	23.17252531	0.053528533
15.60234193	×ÔÉí³µÁ¾	Road 1	70.63721416	61.94116516	-2.85E-05	0.662654459	0.458823532	0	87.6095	980.8242	655.7757	1.3411	3.0069	497	1.75734452	0.004059466	23.23691222	0.053677267
15.61927865	×ÔÉí³µÁ¾	Road 1	70.92881177	61.98077087	-2.57E-05	0.628015995	0.450980395	0	87.9702	980.8486	655.776	1.3232	3.0247	498	2.03423191	0.004699076	23.27136545	0.053756854
15.63441926	×ÔÉí³µÁ¾	Road 1	71.1895918	62.00599823	-2.04E-05	0.612871587	0.450980395	0	88.2107	980.8652	655.7761	1.311	3.037	499	1.674930709	0.00386909	23.29672491	0.053815435
15.64943999	×ÔÉí³µÁ¾	Road 1	71.44841699	62.03228302	-1.89E-05	0.59952122	0.450980395	0	88.4685	980.8818	655.7764	1.2991	3.0489	500	1.720363536	0.00397404	23.32256604	0.053875128
15.66574734	×ÔÉí³µÁ¾	Road 1	71.72952055	62.05624008	-1.77E-05	0.590330303	0.450980395	0	88.7093	980.8984	655.7765	1.2868	3.0611	501	1.57036682	0.003627547	23.34817456	0.053934283
15.6823505	×ÔÉí³µÁ¾	Road 1	72.01583944	62.08143311	-1.63E-05	0.582392573	0.450980395	0	88.9501	980.915	655.7767	1.2746	3.0733	502	1.596765145	0.003688527	23.37468591	0.053995524
15.69912705	×ÔÉí³µÁ¾	Road 1	72.30531757	62.11776352	-1.50E-05	0.573933363	0.450980395	0	89.3459	980.9414	655.777	1.2554	3.0925	503	1.945308298	0.004493662	23.40732146	0.054070913
15.71572471	×ÔÉí³µÁ¾	Road 1	72.59181438	62.14058762	-1.39E-05	0.570114493	0.450980395	0	89.587	980.958	655.7772	1.2432	3.1047	504	1.521653785	0.00351502	23.43257735	0.054129254
15.73258043	×ÔÉí³µÁ¾	Road 1	72.88292434	62.17450104	-1.26E-05	0.566736698	0.450980395	0	89.9488	980.9824	655.7775	1.2254	3.1226	505	1.864344328	0.004306635	23.46400222	0.054201845
15.74910258	×ÔÉí³µÁ¾	Road 1	73.16837646	62.19696121	-1.14E-05	0.563720047	0.450980395	0	90.1901	980.998	655.7776	1.2141	3.1338	506	1.51430471	0.003498044	23.48902179	0.05425964
15.76591321	×ÔÉí³µÁ¾	Road 1	73.45893187	62.22249756	-1.02E-05	0.561154425	0.450980395	0	90.4659	981.0176	655.7779	1.1996	3.1483	507	1.600621747	0.003697436	23.51592925	0.054321797
15.78243426	×ÔÉí³µÁ¾	Road 1	73.74458441	62.24477234	-8.92E-06	0.560662806	0.450980395	0	90.7074	981.0332	655.7781	1.1884	3.1595	508	1.509252735	0.003486374	23.54086369	0.054379395
15.79906931	×ÔÉí³µÁ¾	Road 1	74.03236187	62.27806778	-7.86E-06	0.558670402	0.450980395	0	91.0698	981.0576	655.7783	1.1706	3.1774	509	1.861327849	0.004299667	23.57182698	0.05445092
15.8156985	×ÔÉí³µÁ¾	Road 1	74.32014009	62.30019836	-6.92E-06	0.558009207	0.450980395	0	91.3115	981.0742	655.7786	1.1584	3.1896	510	1.500943276	0.003467179	23.59678644	0.054508577
15.83241749	×ÔÉí³µÁ¾	Road 1	74.60961185	62.33021164	-5.94E-06	0.557918727	0.450980395	0	91.5532	981.0908	655.7787	1.1461	3.2018	511	1.751531973	0.004046039	23.62607029	0.054576222
15.84908297	×ÔÉí³µÁ¾	Road 1	74.89827377	62.35543213	-4.87E-06	0.556363046	0.450980395	0	91.9161	981.1152	655.779	1.1283	3.2196	512	1.600320187	0.00369674	23.65274039	0.05463783
15.86570226	×ÔÉí³µÁ¾	Road 1	75.18623752	62.37748718	-3.61E-06	0.556934416	0.458823532	0	92.1581	981.1309	655.7792	1.117	3.2308	513	1.500411393	0.00346595	23.67767616	0.054695432
15.88288274	×ÔÉí³µÁ¾	Road 1	75.4840836	62.41067963	-2.48E-06	0.559349716	0.458823532	0	92.5212	981.1563	655.7795	1.0982	3.2496	514	1.827158449	0.004220736	23.70906763	0.054767946
15.89908306	×ÔÉí³µÁ¾	Road 1	75.76503727	62.43293381	-1.53E-06	0.562218547	0.466666669	0	92.7634	981.1719	655.7797	1.0869	3.2609	515	1.526622393	0.003526498	23.7337994	0.054825077
15.91578262	×ÔÉí³µÁ¾	Road 1	76.0547532	62.45535965	-7.33E-07	0.56604737	0.466666669	0	93.0057	981.1885	655.7798	1.0747	3.273	516	1.510447386	0.003489133	23.75902321	0.054883344
15.93290776	×ÔÉí³µÁ¾	Road 1	76.35201416	62.48939667	-1.76E-07	0.572872877	0.482352942	0	93.3693	981.2129	655.7802	1.0569	3.2909	517	1.859075069	0.004294463	23.79086013	0.054956887
15.95075575	×ÔÉí³µÁ¾	Road 1	76.66198647	62.52247925	-1.22E-08	0.584398627	0.490196079	0	93.7158	981.2363	655.7804	1.0397	3.308	518	1.787540429	0.004129218	23.82276412	0.055030585
15.96708546	×ÔÉí³µÁ¾	Road 1	76.94569774	62.54615479	2.18E-09	0.59285605	0.490196079	0	93.9584	981.2529	655.7806	1.0274	3.3202	519	1.569994992	0.003626688	23.84840169	0.055089808
15.98344779	×ÔÉí³µÁ¾	Road 1	77.23008522	62.57022858	1.38E-07	0.600043893	0.505882382	0	94.2011	981.2695	655.7808	1.0152	3.3324	520	1.582077256	0.003654598	23.87428816	0.055149606
15.99927495	×ÔÉí³µÁ¾	Road 1	77.50527849	62.59465942	7.64E-07	0.607639194	0.513725519	0	94.444	981.2852	655.7809	1.004	3.3436	521	1.621683095	0.003746088	23.8999548	0.055208896
16.01569813	×ÔÉí³µÁ¾	Road 1	77.79101503	62.63412094	2.19E-06	0.625570059	0.521568656	0	94.8257	981.3115	655.7813	0.9845	3.363	522	2.087334802	0.004821743	23.93423548	0.055288084
16.03244095	×ÔÉí³µÁ¾	Road 1	78.08243297	62.65997314	4.79E-06	0.637258649	0.529411793	0	95.0688	981.3281	655.7814	0.9723	3.3752	523	1.623309798	0.003749846	23.96141426	0.055350867
16.04938831	×ÔÉí³µÁ¾	Road 1	78.37753526	62.6863678	9.16E-06	0.647341609	0.529411793	0	95.312	981.3438	655.7816	0.9611	3.3864	524	1.631106442	0.003767856	23.9890572	0.055414722
16.06568906	×ÔÉí³µÁ¾	Road 1	78.66156134	62.72679062	1.50E-05	0.659177959	0.529411793	0	95.677	981.3691	655.7819	0.9423	3.4052	525	2.131707445	0.004924244	24.02380564	0.055494991
16.08238679	×ÔÉí³µÁ¾	Road 1	78.95263135	62.75415344	2.48E-05	0.66444844	0.529411793	0	95.9204	981.3857	655.7821	0.93	3.4173	526	1.676601742	0.00387295	24.05180109	0.055559661
16.09911972	×ÔÉí³µÁ¾	Road 1	79.24450748	62.7956131	3.60E-05	0.670513511	0.529411793	0	96.2858	981.4102	655.7823	0.9122	3.4351	527	2.132576145	0.004926251	24.08748532	0.055642091
16.11567816	×ÔÉí³µÁ¾	Road 1	79.53346808	62.82343597	5.00E-05	0.672255754	0.529411793	0	96.5295	981.4268	655.7826	0.9	3.4473	528	1.70068188	0.003928575	24.11564596	0.055707142
16.13238212	×ÔÉí³µÁ¾	Road 1	79.82509783	62.85137558	7.05E-05	0.675044119	0.529411793	0	96.7733	981.4424	655.7827	0.8888	3.4585	529	1.697149654	0.003920416	24.14399508	0.055772629
16.14913997	×ÔÉí³µÁ¾	Road 1	80.11786426	62.89346695	9.15E-05	0.677397728	0.529411793	0	97.1392	981.4678	655.783	0.87	3.4772	530	2.153905469	0.004975522	24.1800899	0.055856008
16.16574533	×ÔÉí³µÁ¾	Road 1	80.40809649	62.92161255	0.000116312	0.677969098	0.529411793	0	97.3833	981.4844	655.7832	0.8578	3.4894	531	1.710853368	0.003952071	24.20849924	0.055921633
16.18238551	×ÔÉí³µÁ¾	Road 1	80.69908628	62.95382996	0.000148318	0.679712534	0.53725493	0	97.6275	981.501	655.7834	0.8456	3.5015	532	1.842709163	0.004256658	24.23916226	0.055992465
16.19905282	×ÔÉí³µÁ¾	Road 1	80.99072847	62.99228897	0.000180694	0.683508098	0.53725493	0	97.994	981.5254	655.7837	0.8278	3.5193	533	2.045682273	0.004725526	24.27325827	0.056071227
16.21577035	×ÔÉí³µÁ¾	Road 1	81.28338177	63.02079849	0.000215161	0.686494768	0.53725493	0	98.2385	981.542	655.7839	0.8156	3.5314	534	1.718735917	0.00397028	24.30199129	0.0561376
16.2323889	×ÔÉí³µÁ¾	Road 1	81.5745011	63.06381683	0.000258553	0.689664662	0.53725493	0	98.6054	981.5664	655.7842	0.7979	3.5492	535	2.200776825	0.005083794	24.33856502	0.056222085
16.24909287	×ÔÉí³µÁ¾	Road 1	81.86724997	63.09256668	0.000303681	0.689986587	0.53725493	0	98.8502	981.583	655.7843	0.7857	3.5613	536	1.728947686	0.003993869	24.3674453	0.056288799
16.26569603	×ÔÉí³µÁ¾	Road 1	82.15836505	63.12137146	0.000357453	0.691371262	0.53725493	0	99.095	981.5996	655.7845	0.7735	3.5735	537	1.737102984	0.004012708	24.3962867	0.056355422
16.28251326	×ÔÉí³µÁ¾	Road 1	82.4534356	63.16462326	0.000422358	0.69183749	0.53725493	0	99.4625	981.624	655.7848	0.7558	3.5912	538	2.194701345	0.00506976	24.4331955	0.056440682
16.29978941	×ÔÉí³µÁ¾	Road 1	82.75669694	63.1934967	0.000482751	0.693002462	0.545098066	0	99.7077	981.6406	655.785	0.7437	3.6033	539	1.704014905	0.003936274	24.46263433	0.056508685
16.31722392	×ÔÉí³µÁ¾	Road 1	83.06295862	63.2390625	0.000550485	0.697185814	0.545098066	0	100.0931	981.667	655.7853	0.7244	3.6227	540	2.219671826	0.005127442	24.50133322	0.05659808
16.33241254	×ÔÉí³µÁ¾	Road 1	83.3298912	63.26823807	0.000630314	0.699757934	0.545098066	0	100.3385	981.6836	655.7855	0.7124	3.6348	541	1.842111186	0.004255277	24.52931234	0.056662712
16.34908132	×ÔÉí³µÁ¾	Road 1	83.62297241	63.29753723	0.000713117	0.70130229	0.545098066	0	100.5841	981.7002	655.7856	0.7006	3.647	542	1.753596305	0.004050807	24.55854265	0.056730234
16.3662915	×ÔÉí³µÁ¾	Road 1	83.92578357	63.34159927	0.00078093	0.703219652	0.545098066	0	100.9526	981.7246	655.7859	0.6829	3.6647	543	2.193631386	0.005067289	24.59629543	0.056817442
16.44910423	×ÔÉí³µÁ¾	Road 1	85.38664324	63.50587234	0.000871989	0.70518893	0.545098066	0	102.3237	981.8174	655.787	0.6149	3.7325	544	1.881196302	0.004345563	24.75208244	0.05717731
16.4656788	×ÔÉí³µÁ¾	Road 1	85.67923101	63.55012665	0.000955584	0.705477715	0.545098066	0	102.6935	981.8418	655.7873	0.5972	3.7502	545	2.260135239	0.005220912	24.78954321	0.057263845
16.4823747	×ÔÉí³µÁ¾	Road 1	85.97410734	63.58176727	0.001435629	0.7053864	0.545098066	0	102.9577	981.8594	655.7875	0.5844	3.7629	546	1.835577697	0.004240184	24.82018983	0.057334638
16.49903907	×ÔÉí³µÁ¾	Road 1	86.26856353	63.6112793	0.001519952	0.705322385	0.545098066	0	103.2045	981.876	655.7877	0.5722	3.776	547	1.76807595	0.004084255	24.84965371	0.0574027
16.51575513	×ÔÉí³µÁ¾	Road 1	86.56413864	63.6555748	0.001598735	0.705413759	0.545098066	0	103.5749	981.9014	655.788	0.5535	3.7946	548	2.252315265	0.005202848	24.88730355	0.057489671
16.53254231	×ÔÉí³µÁ¾	Road 1	86.86110878	63.68508682	0.001677608	0.705088079	0.545098066	0	103.8219	981.918	655.7882	0.5414	3.8067	549	1.762651603	0.004071725	24.91689348	0.057558024
16.54909195	×ÔÉí³µÁ¾	Road 1	87.15401264	63.71459885	0.001735129	0.705404401	0.545098066	0	104.0691	981.9346	655.7883	0.5293	3.8189	550	1.777219427	0.004105377	24.94630583	0.057625966
16.56567275	×ÔÉí³µÁ¾	Road 1	87.4476718	63.75886002	0.0017872	0.705684483	0.545098066	0	104.4401	981.959	655.7886	0.5116	3.837	551	2.266250382	0.005235038	24.98388208	0.057712768
16.58239577	×ÔÉí³µÁ¾	Road 1	87.74398701	63.78838577	0.001825219	0.705415964	0.545098066	0	104.6875	981.9756	655.7888	0.4994	3.8491	552	1.769193454	0.004086837	25.01346834	0.057781112
16.60033577	×ÔÉí³µÁ¾	Road 1	88.06208614	63.83263321	0.001844429	0.705686808	0.545098066	0	105.0589	982.001	655.7891	0.4817	3.8677	553	2.156576927	0.004981693	25.05215731	0.057870483
16.62144097	×ÔÉí³µÁ¾	Road 1	88.43656792	63.87687378	0.001862388	0.70449698	0.545098066	0	105.4306	982.0254	655.7894	0.464	3.8854	554	1.953564582	0.004512734	25.09338769	0.057965726
16.64924059	×ÔÉí³µÁ¾	Road 1	88.93006025	63.90635834	0.001876281	0.705471873	0.545098066	0	105.6785	982.042	655.7896	0.4519	3.8975	555	1.382665115	0.003193956	25.13182525	0.058054516
16.6657884	×ÔÉí³µÁ¾	Road 1	89.22410362	63.96955719	0.001895847	0.704636514	0.545098066	0	106.2101	982.0781	655.79	0.4254	3.9239	556	2.907822672	0.00671707	25.17994335	0.058165669
16.68237983	×ÔÉí³µÁ¾	Road 1	89.51905798	63.99904175	0.001929705	0.704758465	0.545098066	0	106.4584	982.0947	655.7902	0.4133	3.936	557	1.780416613	0.004112762	25.20948301	0.058233906
16.69913438	×ÔÉí³µÁ¾	Road 1	89.81711789	64.04324799	0.001946784	0.704406738	0.545098066	0	106.8311	982.1191	655.7905	0.3956	3.9537	558	2.257893729	0.005215735	25.247313	0.058321293
16.71574414	×ÔÉí³µÁ¾	Road 1	90.11273804	64.07272568	0.001963963	0.704962194	0.545098066	0	107.0796	982.1357	655.7906	0.3835	3.9667	559	1.780806984	0.004113664	25.27689178	0.05838962
16.73244443	×ÔÉí³µÁ¾	Road 1	90.41010625	64.10218277	0.001975472	0.704238355	0.545098066	0	107.3283	982.1523	655.7908	0.3714	3.9788	560	1.77547609	0.00410135	25.30654276	0.058458114
16.74902084	×ÔÉí³µÁ¾	Road 1	90.70547181	64.14636841	0.001982688	0.704745948	0.545098066	0	107.7015	982.1777	655.7911	0.3527	3.9974	561	2.27607216	0.005257727	25.34427184	0.058545268
16.76579041	×ÔÉí³µÁ¾	Road 1	91.00441669	64.17583237	0.001995721	0.704253137	0.545098066	0	107.9505	982.1943	655.7913	0.3406	4.0095	562	1.773358107	0.004096457	25.37401031	0.058613964
16.7824218	×ÔÉí³µÁ¾	Road 1	91.30104378	64.20737	0.002002986	0.704960942	0.545098066	0	108.2174	982.2119	655.7915	0.3279	4.0222	563	1.851332727	0.004276579	25.40480054	0.058685089
16.79909131	×ÔÉí³µÁ¾	Road 1	91.5985553	64.25153503	0.002011728	0.704247475	0.545098066	0	108.5912	982.2363	655.7918	0.3102	4.0398	564	2.270363047	0.005244539	25.44264637	0.058772513
16.81570473	×ÔÉí³µÁ¾	Road 1	91.89520167	64.28096466	0.002020494	0.704755247	0.545098066	0	108.8406	982.2529	655.792	0.2981	4.0519	565	1.783796476	0.00412057	25.47228134	0.05884097
16.83241383	×ÔÉí³µÁ¾	Road 1	92.19369299	64.31040802	0.002029286	0.704011977	0.545098066	0	109.0901	982.2695	655.7922	0.286	4.064	566	1.779297078	0.004110176	25.50201179	0.058909647
16.84954923	×ÔÉí³µÁ¾	Road 1	92.50001981	64.35662613	0.002043997	0.704108179	0.545098066	0	109.4824	982.2959	655.7925	0.2668	4.0842	567	2.300126683	0.005313293	25.54142538	0.059000693
16.86566707	×ÔÉí³µÁ¾	Road 1	92.78828761	64.38604889	0.002061743	0.704020321	0.545098066	0	109.7322	982.3125	655.7927	0.2547	4.0963	568	1.816285484	0.004195619	25.57069998	0.059068317
16.88240805	×ÔÉí³µÁ¾	Road 1	93.08783709	64.41545105	0.00209005	0.70393461	0.545098066	0	109.9821	982.3291	655.7928	0.2426	4.1083	569	1.778476191	0.00410828	25.60047342	0.059137094
16.89904347	×ÔÉí³µÁ¾	Road 1	93.38571117	64.46166229	0.002115596	0.703783333	0.545098066	0	110.375	982.3545	655.7931	0.2243	4.1266	570	2.348305962	0.005424587	25.63953847	0.059227334
16.91567229	×ÔÉí³µÁ¾	Road 1	93.68361272	64.49318619	0.002141349	0.704105079	0.552941203	0	110.6431	982.3721	655.7933	0.2116	4.1393	571	1.857942545	0.004291847	25.67043386	0.059298702
16.93255074	×ÔÉí³µÁ¾	Road 1	93.98610406	64.51831741	0.002170379	0.697912633	0.552941203	0	110.8577	982.3867	655.7935	0.2009	4.15	572	1.631837075	0.003769544	25.69797674	0.059362326
16.94907655	×ÔÉí³µÁ¾	Road 1	94.28248186	64.56322403	0.00219967	0.608659089	0.552941203	0	111.2691	982.4141	655.7938	0.181	4.1709	573	2.317793139	0.005354102	25.73628016	0.059450807
16.99903376	×ÔÉí³µÁ¾	Road 1	95.17904592	64.60791092	0.0022261	0.310373545	0.552941203	0	111.9318	982.4541	655.7943	0.153	4.1989	574	1.301770259	0.003007089	25.80131296	0.059601033
17.01671093	×ÔÉí³µÁ¾	Road 1	95.49635549	64.62088852	0.002246453	0.205425382	0.552941203	0	112.4338	982.4775	655.7944	0.1397	4.2151	575	1.212550383	0.002800991	25.82274742	0.059650547
17.03233722	×ÔÉí³µÁ¾	Road 1	95.7768776	64.62696533	0.00228118	0.228178903	0.552941203	0	112.6851	982.4873	655.7946	0.1345	4.2223	576	1.019837449	0.002355825	25.8386837	0.059687359
17.0489862	×ÔÉí³µÁ¾	Road 1	96.07582402	64.64102097	0.002282767	0.300789356	0.552941203	0	113.0621	982.499	655.7946	0.1307	4.2321	577	1.274323318	0.002943687	25.85989988	0.059736369
17.06567037	×ÔÉí³µÁ¾	Road 1	96.37546679	64.65493927	0.002285942	0.356773525	0.552941203	0	113.3136	982.5059	655.7947	0.1294	4.2393	578	1.26894021	0.002931252	25.8810711	0.059785274
17.08249456	×ÔÉí³µÁ¾	Road 1	96.67770728	64.67268219	0.002285942	0.410275817	0.552941203	0	113.5652	982.5117	655.7947	0.1301	4.2455	579	1.392348688	0.003216325	25.90449624	0.059839386
17.09903797	×ÔÉí³µÁ¾	Road 1	96.97506303	64.70737152	0.002285942	0.488758564	0.552941203	0	113.9607	982.5205	655.7947	0.1305	4.2579	580	1.975532111	0.004563479	25.93717828	0.059914882
17.11567412	×ÔÉí³µÁ¾	Road 1	97.2742044	64.73305893	0.002285942	0.530072927	0.56078434	0	114.2125	982.5254	655.7947	0.1322	4.267	581	1.667094821	0.003850989	25.96491232	0.059978947
17.13240265	×ÔÉí³µÁ¾	Road 1	97.57513665	64.76101227	0.002285942	0.573486567	0.56078434	0	114.4644	982.5303	655.7947	0.1339	4.2752	582	1.738691136	0.004016377	25.99399806	0.060046136
17.14898931	×ÔÉí³µÁ¾	Road 1	97.87372571	64.80631027	0.002285942	0.627004921	0.56078434	0	114.8424	982.5371	655.7947	0.1369	4.2899	583	2.333017386	0.00538927	26.03269504	0.060135526
17.16572993	×ÔÉí³µÁ¾	Road 1	98.17523391	64.83807449	0.002285942	0.655613244	0.56078434	0	115.0945	982.542	655.7947	0.1396	4.2991	584	1.867223104	0.004313285	26.06395351	0.060207733
17.18234006	×ÔÉí³µÁ¾	Road 1	98.47454153	64.87051849	0.002285942	0.677818358	0.56078434	0	115.3468	982.5459	655.7947	0.1423	4.3082	585	1.899294205	0.00438737	26.09550102	0.060280607
17.19905795	×ÔÉí³µÁ¾	Road 1	98.77603097	64.92217484	0.002285942	0.704682469	0.56078434	0	115.7434	982.5537	655.7947	0.1447	4.3236	586	2.53785773	0.005862451	26.13792866	0.060378615
17.21567541	×ÔÉí³µÁ¾	Road 1	99.07586058	64.95498276	0.002285942	0.717922628	0.56078434	0	115.9959	982.5576	655.7947	0.1484	4.3317	587	1.913180466	0.004419447	26.16972085	0.060452055
17.23232622	×ÔÉí³µÁ¾	Road 1	99.37644335	64.98769455	0.002285942	0.725275457	0.56078434	0	116.2486	982.5625	655.7947	0.1501	4.3409	588	1.908531503	0.004408708	26.20149945	0.060525464
17.24900599	×ÔÉí³µÁ¾	Road 1	99.67778432	65.03851318	0.002285942	0.733724356	0.56078434	0	116.6458	982.5703	655.7947	0.1515	4.3532	589	2.517630673	0.005815727	26.24349296	0.060622469
17.26573671	×ÔÉí³µÁ¾	Road 1	99.98019389	65.0703804	0.002285942	0.733930051	0.56078434	0	116.8988	982.5742	655.7947	0.1542	4.3594	590	1.876930342	0.004335709	26.27489536	0.060695008
17.28235747	×ÔÉí³µÁ¾	Road 1	100.2807718	65.10417709	0.002285942	0.734938681	0.56078434	0	117.1699	982.5791	655.7947	0.1562	4.3653	591	1.950119667	0.004504776	26.30730782	0.060769881
17.29907023	×ÔÉí³µÁ¾	Road 1	100.5832315	65.15110931	0.002285942	0.734775662	0.56078434	0	117.5498	982.5859	655.7947	0.1573	4.3731	592	2.387255525	0.00551456	26.34720545	0.060862045
17.31570821	×ÔÉí³µÁ¾	Road 1	100.8844819	65.18224869	0.002285942	0.734764278	0.56078434	0	117.8032	982.5898	655.7947	0.1586	4.375	593	1.860990473	0.004298888	26.37816858	0.060933569
17.3323429	×ÔÉí³µÁ¾	Road 1	101.1858877	65.22883759	0.002285942	0.735212266	0.56078434	0	118.1835	982.5957	655.7947	0.1548	4.373	594	2.385547621	0.005510615	26.41785141	0.061025237
17.34897942	×ÔÉí³µÁ¾	Road 1	101.4874701	65.2598465	0.002285942	0.734927237	0.56078434	0	118.4372	982.5996	655.7947	0.1526	4.3713	595	1.85852155	0.004293185	26.44877074	0.06109666
17.36565625	×ÔÉí³µÁ¾	Road 1	101.7899373	65.29305267	0.002285942	0.735170484	0.56078434	0	118.7092	982.6035	655.7947	0.1517	4.3693	596	1.931080376	0.004460796	26.48097505	0.061171052
17.38238294	×ÔÉí³µÁ¾	Road 1	102.0934525	65.32404099	0.002285942	0.73483479	0.56078434	0	118.9632	982.6074	655.7947	0.1514	4.3686	597	1.853688802	0.004282021	26.51198113	0.061242676
17.39899784	×ÔÉí³µÁ¾	Road 1	102.395174	65.37493515	0.00228118	0.734865308	0.56078434	0	119.3806	982.6133	655.7946	0.1512	4.3669	598	2.538390518	0.005863682	26.55415621	0.061340101
17.41875118	×ÔÉí³µÁ¾	Road 1	102.7541438	65.42137985	0.002274839	0.735118449	0.56078434	0	119.7621	982.6182	655.7946	0.1523	4.3639	599	2.137677203	0.004938034	26.59638249	0.061437644
17.43440423	×ÔÉí³µÁ¾	Road 1	103.0387351	65.45234756	0.002263772	0.735012293	0.56078434	0	120.0166	982.6211	655.7946	0.154	4.3622	600	1.927856471	0.004453348	26.62655931	0.061507352
17.45088826	×ÔÉí³µÁ¾	Road 1	103.3385763	65.48328781	0.002255889	0.734050751	0.552941203	0	120.2711	982.624	655.7946	0.1547	4.3605	601	1.871257587	0.004322605	26.65740518	0.061578606
17.46586428	×ÔÉí³µÁ¾	Road 1	103.6111156	65.51417313	0.002243314	0.732431948	0.552941203	0	120.5258	982.627	655.7945	0.1564	4.3588	602	1.97690601	0.004566653	26.68701136	0.061646996
17.48284609	×ÔÉí³µÁ¾	Road 1	103.9203434	65.55366898	0.002229223	0.728736877	0.552941203	0	120.7989	982.6309	655.7945	0.1575	4.3578	603	2.127046253	0.004913477	26.72313246	0.061730436
17.49915307	×ÔÉí³µÁ¾	Road 1	104.217461	65.59295197	0.002207422	0.726037681	0.552941203	0	121.1813	982.6357	655.7944	0.1595	4.3558	604	2.175288039	0.005024915	26.75860485	0.061812377
17.51571041	×ÔÉí³µÁ¾	Road 1	104.5192803	65.62341843	0.002176524	0.725086987	0.552941203	0	121.4365	982.6387	655.7944	0.1612	4.3541	605	1.853688149	0.00428202	26.789297	0.061883276
17.53238212	×ÔÉí³µÁ¾	Road 1	104.8233954	65.66901169	0.002132236	0.724134564	0.545098066	0	121.8194	982.6436	655.7944	0.1623	4.3521	606	2.362228724	0.005456748	26.82867938	0.061974249
17.54899664	×ÔÉí³µÁ¾	Road 1	105.126607	65.69925842	0.00207363	0.719731808	0.545098066	0	122.0748	982.6465	655.7944	0.164	4.3504	607	1.844383859	0.004260527	26.85932294	0.062045036
17.5657347	×ÔÉí³µÁ¾	Road 1	105.4322128	65.72931976	0.002007354	0.715382874	0.545098066	0	122.3303	982.6494	655.7943	0.1658	4.3487	608	1.831171801	0.004230007	26.88997319	0.062115838
17.5825204	×ÔÉí³µÁ¾	Road 1	105.7389077	65.77628632	0.001925451	0.713100791	0.545098066	0	122.7321	982.6543	655.7943	0.1682	4.3463	609	2.40151736	0.005547505	26.93028436	0.062208957
17.59899197	×ÔÉí³µÁ¾	Road 1	106.0399992	65.8060936	0.001823852	0.711736917	0.545098066	0	122.988	982.6572	655.7943	0.1699	4.3446	610	1.840713429	0.004252048	26.96060379	0.062278995
17.61567138	×ÔÉí³µÁ¾	Road 1	106.3450376	65.83798828	0.001724574	0.71101898	0.545098066	0	123.2622	982.6611	655.7943	0.171	4.3436	611	1.899805795	0.004388551	26.99229142	0.062352193
17.63239147	×ÔÉí³µÁ¾	Road 1	106.6510271	65.88253784	0.001623902	0.710208476	0.545098066	0	123.6464	982.666	655.7943	0.1721	4.3415	612	2.32891563	0.005379795	27.03123111	0.062442144
17.66576054	×ÔÉí³µÁ¾	Road 1	107.2621758	65.93337021	0.001507881	0.709194958	0.545098066	0	124.0857	982.6709	655.7942	0.1752	4.3385	613	1.680470049	0.003881886	27.08730683	0.062571679
17.68239266	×ÔÉí³µÁ¾	Road 1	107.5670345	65.98625565	0.001410148	0.708179295	0.545098066	0	124.5438	982.6768	655.7941	0.1776	4.3361	614	2.625738709	0.006065456	27.13097843	0.06267256
17.69898299	×ÔÉí³µÁ¾	Road 1	107.8712636	66.01585007	0.001213942	0.708092034	0.545098066	0	124.8004	982.6797	655.7941	0.1794	4.3344	615	1.830919735	0.004229425	27.161354	0.062742728
17.7156558	×ÔÉí³µÁ¾	Road 1	108.1771519	66.04752502	0.001129505	0.707987189	0.545098066	0	125.0755	982.6836	655.7941	0.1795	4.3333	616	1.897811464	0.004383944	27.19299584	0.06281582
17.73251811	×ÔÉí³µÁ¾	Road 1	108.4867247	66.09188232	0.001051915	0.708085179	0.545098066	0	125.4609	982.6875	655.7941	0.1826	4.3293	617	2.316024887	0.005350017	27.23204938	0.062906034
17.74902707	×ÔÉí³µÁ¾	Road 1	108.7899554	66.12354355	0.000970763	0.707316935	0.545098066	0	125.7364	982.6914	655.7941	0.1837	4.3282	618	1.909947782	0.004411979	27.26358063	0.062978871
17.76563243	×ÔÉí³µÁ¾	Road 1	109.0950931	66.15308304	0.000899857	0.707891285	0.53725493	0	125.9936	982.6943	655.794	0.1854	4.3265	619	1.831289536	0.004230279	27.29398985	0.063049117
17.78239687	×ÔÉí³µÁ¾	Road 1	109.4032916	66.18258133	0.000837361	0.704575598	0.53725493	0	126.2509	982.6973	655.794	0.1872	4.3248	620	1.820914665	0.004206313	27.32451647	0.063119633
17.7991177	×ÔÉí³µÁ¾	Road 1	109.7109211	66.23276138	0.000769341	0.699979901	0.53725493	0	126.6922	982.7031	655.7939	0.1893	4.3226	621	2.532240369	0.005849475	27.36685762	0.063217441
17.81569227	×ÔÉí³µÁ¾	Road 1	110.015994	66.26189575	0.000715312	0.69836688	0.53725493	0	126.9498	982.7061	655.7939	0.1901	4.3209	622	1.821710336	0.004208151	27.39705169	0.063287189
17.83236141	×ÔÉí³µÁ¾	Road 1	110.322942	66.29092712	0.000652787	0.697663963	0.53725493	0	127.2076	982.709	655.7939	0.1919	4.3192	623	1.813126983	0.004188323	27.42727496	0.063357005
17.84903825	×ÔÉí³µÁ¾	Road 1	110.6302334	66.33445358	0.000601161	0.696437478	0.53725493	0	127.5944	982.7139	655.7939	0.194	4.3171	624	2.311651117	0.005339914	27.46582599	0.063446058
17.86571472	×ÔÉí³µÁ¾	Road 1	110.9376521	66.36339569	0.000549256	0.695733249	0.53725493	0	127.8524	982.7168	655.7938	0.1958	4.3154	625	1.811273872	0.004184043	27.49603165	0.063515833
17.88235637	×ÔÉí³µÁ¾	Road 1	111.2446295	66.40679169	0.000498123	0.694929659	0.53725493	0	128.2396	982.7217	655.7938	0.1979	4.3132	626	2.31251552	0.005341911	27.53451572	0.063604731
17.90234394	×ÔÉí³µÁ¾	Road 1	111.6134873	66.43567886	0.000452961	0.695076287	0.53725493	0	128.4979	982.7246	655.7938	0.1997	4.3115	627	1.646314768	0.003802987	27.56742156	0.063680744
17.9173973	×ÔÉí³µÁ¾	Road 1	111.8914685	66.47899933	0.000413149	0.694082797	0.53725493	0	128.8855	982.7295	655.7938	0.2018	4.3094	628	2.469840949	0.005705333	27.60460096	0.063766628
17.93239862	×ÔÉí³µÁ¾	Road 1	112.1686087	66.50783844	0.000363481	0.694412827	0.53725493	0	129.1441	982.7324	655.7937	0.2036	4.3076	629	1.921983203	0.004439781	27.63343323	0.063833231
17.94900141	×ÔÉí³µÁ¾	Road 1	112.4754684	66.53669128	0.000325702	0.693892717	0.53725493	0	129.4028	982.7354	655.7937	0.2054	4.3059	630	1.816558218	0.004196249	27.66359317	0.0639029
17.9656317	×ÔÉí³µÁ¾	Road 1	112.7830359	66.57992249	0.000294672	0.693139136	0.53725493	0	129.791	982.7402	655.7936	0.2075	4.3038	631	2.313090609	0.005343239	27.70206053	0.06399176
17.98229021	×ÔÉí³µÁ¾	Road 1	113.0912685	66.61082153	0.000263038	0.693655193	0.53725493	0	130.0685	982.7432	655.7936	0.2097	4.3017	632	1.88557952	0.004355689	27.73347148	0.064064319
17.99902496	×ÔÉí³µÁ¾	Road 1	113.4010457	66.63963318	0.000227896	0.693561614	0.53725493	0	130.3276	982.7461	655.7936	0.2114	4.2999	633	1.809597614	0.00418017	27.76375465	0.064134273
18.01566661	×ÔÉí³µÁ¾	Road 1	113.7092992	66.68285065	0.000198203	0.693894506	0.53725493	0	130.7164	982.751	655.7936	0.2136	4.2977	634	2.314705664	0.00534697	27.80227517	0.064223256
18.03231229	×ÔÉí³µÁ¾	Road 1	114.01777	66.71369476	0.000170927	0.693076491	0.53725493	0	130.9943	982.7539	655.7935	0.2157	4.2956	635	1.886950963	0.004358857	27.83368475	0.064295812
18.04897154	×ÔÉí³µÁ¾	Road 1	114.3266254	66.74249268	0.000142246	0.693229914	0.53725493	0	131.2538	982.7568	655.7935	0.2175	4.2938	636	1.815952879	0.004194851	27.86393716	0.064365695
18.06564617	×ÔÉí³µÁ¾	Road 1	114.6359663	66.78568954	0.000120283	0.692896247	0.53725493	0	131.6432	982.7617	655.7935	0.2197	4.2916	637	2.314136504	0.005345655	27.90252455	0.064454832
18.08234501	×ÔÉí³µÁ¾	Road 1	114.9458323	66.80212784	0.000101899	0.692609727	0.53725493	0	131.7916	982.7637	655.7935	0.2205	4.2909	638	1.387797337	0.003205812	27.92569914	0.064508365
18.0990442	×ÔÉí³µÁ¾	Road 1	115.2559339	66.85145645	8.39E-05	0.693049729	0.53725493	0	132.2371	982.7686	655.7934	0.2237	4.2877	639	2.525908194	0.005834848	27.96787978	0.064605802
18.11567926	×ÔÉí³µÁ¾	Road 1	115.5649772	66.88023376	7.14E-05	0.692346692	0.53725493	0	132.4971	982.7715	655.7934	0.2255	4.2859	640	1.819819217	0.004203782	27.99815257	0.064675732
18.13238982	×ÔÉí³µÁ¾	Road 1	115.8755759	66.91308975	6.14E-05	0.693329632	0.53725493	0	132.7944	982.7754	655.7933	0.227	4.2844	641	1.957122273	0.004520952	28.03085718	0.06475128
18.14905969	×ÔÉí³µÁ¾	Road 1	116.1855516	66.94187393	5.23E-05	0.692993104	0.53725493	0	133.0547	982.7783	655.7933	0.2278	4.2826	642	1.819368207	0.004202741	28.06118582	0.064821339
18.16565515	×ÔÉí³µÁ¾	Road 1	116.4943519	66.98703461	4.59E-05	0.692605972	0.53725493	0	133.4639	982.7832	655.7933	0.2303	4.28	643	2.395821137	0.005534347	28.10094558	0.064913184
18.18237525	×ÔÉí³µÁ¾	Road 1	116.8056143	67.01785812	4.01E-05	0.692745924	0.53725493	0	133.7431	982.7871	655.7933	0.2315	4.2789	644	1.88869917	0.004362895	28.13252481	0.064986132
18.2003398	×ÔÉí³µÁ¾	Road 1	117.1402075	67.05069351	3.65E-05	0.692045867	0.53725493	0	134.0037	982.79	655.7932	0.2333	4.2771	645	1.880358577	0.004343628	28.1663046	0.065064164
18.21651592	×ÔÉí³µÁ¾	Road 1	117.4416754	67.09174118	3.36E-05	0.692502737	0.53725493	0	134.4136	982.7949	655.7932	0.2358	4.2745	646	2.292657318	0.005296038	28.20339091	0.065149833
18.23235335	×ÔÉí³µÁ¾	Road 1	117.7369574	67.12047043	3.12E-05	0.691326559	0.53725493	0	134.6745	982.7979	655.7932	0.2376	4.2727	647	1.874045695	0.004329046	28.23307097	0.065218394
18.24902175	×ÔÉí³µÁ¾	Road 1	118.0478752	67.15122528	2.99E-05	0.691886604	0.53725493	0	134.9543	982.8008	655.7932	0.2397	4.2705	648	1.892788185	0.004372341	28.26462073	0.065291274
18.26562895	×ÔÉí³µÁ¾	Road 1	118.3578499	67.19431229	2.90E-05	0.691746652	0.53725493	0	135.3461	982.8057	655.7931	0.2419	4.2683	649	2.328731254	0.005379369	28.30329442	0.06538061
18.28232961	×ÔÉí³µÁ¾	Road 1	118.6697024	67.22300034	2.79E-05	0.691646636	0.53725493	0	135.6074	982.8086	655.7931	0.2437	4.2665	650	1.820558245	0.00420549	28.33369896	0.065450845
18.29899765	×ÔÉí³µÁ¾	Road 1	118.9810786	67.25172272	2.62E-05	0.692588806	0.545098066	0	135.8689	982.8115	655.793	0.2455	4.2647	651	1.824358231	0.004214268	28.36410743	0.065521088
18.31561071	×ÔÉí³µÁ¾	Road 1	119.291627	67.29491272	2.43E-05	0.695238948	0.545098066	0	136.2613	982.8164	655.793	0.2477	4.2624	652	2.334840031	0.00539348	28.40289627	0.06561069
18.33235939	×ÔÉí³µÁ¾	Road 1	119.6048455	67.32388916	2.20E-05	0.698539197	0.545098066	0	136.523	982.8193	655.793	0.2495	4.2606	653	1.829989636	0.004227276	28.43354618	0.065681492
18.34907252	×ÔÉí³µÁ¾	Road 1	119.9175437	67.35504227	1.93E-05	0.699289143	0.545098066	0	136.8036	982.8232	655.793	0.2507	4.2594	654	1.90861421	0.004408899	28.4654451	0.065755178
18.36652793	×ÔÉí³µÁ¾	Road 1	120.2443415	67.39874039	1.65E-05	0.700609267	0.529411793	0	137.1966	982.8281	655.7929	0.2529	4.2571	655	2.281874462	0.00527113	28.50527614	0.065847188
18.38232393	×ÔÉí³µÁ¾	Road 1	120.5401996	67.42775803	1.37E-05	0.694798887	0.521568656	0	137.4588	982.8311	655.7929	0.2547	4.2553	656	1.894658252	0.004376661	28.53520417	0.065916322
18.39904402	×ÔÉí³µÁ¾	Road 1	120.8535649	67.47063217	1.15E-05	0.684458137	0.521568656	0	137.8522	982.8359	655.7928	0.2569	4.253	657	2.319446002	0.00535792	28.57398552	0.066005907
18.41572636	×ÔÉí³µÁ¾	Road 1	121.1663532	67.4987915	9.65E-06	0.678407788	0.521568656	0	138.1146	982.8389	655.7928	0.2587	4.2512	658	1.80941843	0.004179757	28.60417085	0.066075635
18.43236508	×ÔÉí³µÁ¾	Road 1	121.4784525	67.52671051	8.08E-06	0.67382735	0.513725519	0	138.3772	982.8418	655.7928	0.2605	4.2494	659	1.804199324	0.0041677	28.63419041	0.06614498
18.44918744	×ÔÉí³µÁ¾	Road 1	121.7941906	67.56821823	6.47E-06	0.667126894	0.505882382	0	138.7712	982.8467	655.7928	0.2628	4.2471	660	2.265867204	0.005234153	28.67230764	0.066233031
18.46565131	×ÔÉí³µÁ¾	Road 1	122.1033248	67.59548492	4.95E-06	0.659816325	0.498039216	0	139.034	982.8496	655.7927	0.2646	4.2452	661	1.793003629	0.004141838	28.70182742	0.066301221
18.5016156	×ÔÉí³µÁ¾	Road 1	122.7792905	67.66368942	3.52E-06	0.63833487	0.490196079	0	139.7102	982.8574	655.7927	0.269	4.2408	662	1.934659784	0.004469064	28.77140609	0.066461948
18.51754833	×ÔÉí³µÁ¾	Road 1	123.0788678	67.68947296	2.60E-06	0.631014347	0.490196079	0	139.9734	982.8604	655.7927	0.2708	4.2389	663	1.772936962	0.004095484	28.79965381	0.0665272
18.53262845	×ÔÉí³µÁ¾	Road 1	123.3625206	67.71498871	1.28E-06	0.626924038	0.474509805	0	140.2367	982.8633	655.7926	0.2726	4.2371	664	1.816636338	0.00419643	28.82704891	0.066590483
18.54896585	×ÔÉí³µÁ¾	Road 1	123.6700017	67.75444336	8.84E-07	0.612953126	0.466666669	0	140.6506	982.8691	655.7926	0.2743	4.2355	665	2.240620861	0.005175834	28.86365484	0.066675043
18.56565882	×ÔÉí³µÁ¾	Road 1	123.9842961	67.78063889	6.01E-07	0.608232737	0.466666669	0	140.9329	982.8721	655.7925	0.2764	4.2333	666	1.746209889	0.004033745	28.89280427	0.066742378
18.58235949	×ÔÉí³µÁ¾	Road 1	124.2988468	67.80462341	3.39E-07	0.594931781	0.458823532	0	141.1966	982.875	655.7925	0.2783	4.2315	667	1.668750722	0.003854814	28.92067351	0.066806756
18.5990081	×ÔÉí³µÁ¾	Road 1	124.61258	67.83986206	1.29E-07	0.583761036	0.458823532	0	141.5922	982.8799	655.7925	0.2805	4.2292	668	2.068227785	0.004777606	28.95510664	0.066886296
18.61562885	×ÔÉí³µÁ¾	Road 1	124.925895	67.86298828	2.25E-08	0.577730596	0.450980395	0	141.856	982.8828	655.7925	0.2824	4.2274	669	1.643702515	0.003796953	28.98242622	0.066949405
18.63235188	×ÔÉí³µÁ¾	Road 1	125.2412512	67.88737793	1.75E-11	0.570610166	0.443137258	0	142.1388	982.8867	655.7925	0.2836	4.2262	670	1.683502561	0.003888891	29.01057947	0.067014439
18.64902762	×ÔÉí³µÁ¾	Road 1	125.5558705	67.9207901	-2.40E-08	0.557979286	0.427450985	0	142.5349	982.8906	655.7924	0.2868	4.2229	671	2.00405944	0.004629377	29.04399864	0.067091637
18.6823736	×ÔÉí³µÁ¾	Road 1	126.1853168	67.95441513	-1.79E-07	0.537467718	0.411764711	0	142.9501	982.8955	655.7924	0.2894	4.2203	672	1.420562612	0.0032815	29.0913687	0.067201062
18.6989434	×ÔÉí³µÁ¾	Road 1	126.4983386	68.00795288	-5.88E-07	1.174512506	0.388235301	0	143.4787	982.9023	655.7923	0.2922	4.2176	673	2.727161746	0.006299744	29.13655723	0.067305447
18.71566789	×ÔÉí³µÁ¾	Road 1	126.8146544	68.08798828	-3.08E-06	2.091066837	0.349019617	0	143.7433	982.9053	655.7923	0.294	4.2157	674	3.643789153	0.008417153	29.19749775	0.06744622
18.73233154	×ÔÉí³µÁ¾	Road 1	127.130337	68.1998291	-5.53E-06	2.105527878	0.325490206	0	144.0273	982.9092	655.7922	0.2953	4.2145	675	4.782930241	0.011048569	29.27719879	0.067630329
18.74899811	×ÔÉí³µÁ¾	Road 1	127.4465631	68.30519485	-9.20E-06	0.925422788	0.301960796	0	144.4254	982.9131	655.7922	0.2986	4.2112	676	4.560197301	0.010534056	29.35320166	0.067805896
18.76561923	×ÔÉí³µÁ¾	Road 1	127.7620551	68.33301086	-1.32E-05	0.582539022	0.278431386	0	144.6911	982.917	655.7922	0.2996	4.2103	677	1.81955341	0.004203168	29.38344468	0.067875757
18.78232503	×ÔÉí³µÁ¾	Road 1	128.0792954	68.36340866	-1.68E-05	0.909421802	0.270588249	0	144.9569	982.9199	655.7922	0.3015	4.2084	678	1.906484279	0.004403979	29.41529402	0.067949329
18.80101206	×ÔÉí³µÁ¾	Road 1	128.4345619	68.4409996	-2.04E-05	1.21937561	0.262745112	0	145.3559	982.9248	655.7921	0.3038	4.2061	679	3.286766699	0.007592431	29.47671394	0.068091209
18.8186896	×ÔÉí³µÁ¾	Road 1	128.7709553	68.50594254	-2.32E-05	0.706549704	0.239215687	0	145.7553	982.9287	655.7921	0.3072	4.2028	680	3.006753746	0.006945601	29.52986594	0.06821399
18.83378805	×ÔÉí³µÁ¾	Road 1	129.0583605	68.52749634	-2.53E-05	0.466510922	0.23137255	0	146.0217	982.9326	655.7921	0.3082	4.2019	681	1.678272777	0.00387681	29.55520525	0.068272524
18.85003895	×ÔÉí³µÁ¾	Road 1	129.3677858	68.54580231	-2.65E-05	0.5413661	0.223529413	0	146.2883	982.9355	655.7921	0.3101	4.2	682	1.500326571	0.003465754	29.57958691	0.068328846
18.86570556	×ÔÉí³µÁ¾	Road 1	129.6661959	68.57109146	-2.74E-05	0.678557634	0.215686277	0	146.5549	982.9385	655.792	0.312	4.1981	683	1.789716833	0.004134246	29.6076257	0.068393615
18.88229259	×ÔÉí³µÁ¾	Road 1	129.9823157	68.60968781	-2.81E-05	0.526526988	0.20784314	0	146.955	982.9434	655.792	0.3144	4.1958	684	2.212915126	0.005111834	29.6443314	0.068478406
18.89897309	×ÔÉí³µÁ¾	Road 1	130.300286	68.62460175	-2.98E-05	0.336371809	0.200000003	0	147.2218	982.9463	655.7919	0.3163	4.1939	685	1.363933683	0.003150687	29.6670825	0.068530961
18.91631816	×ÔÉí³µÁ¾	Road 1	130.6309845	68.63707123	-3.25E-05	0.291648805	0.192156866	0	147.6221	982.9512	655.7919	0.3187	4.1915	686	1.260231591	0.002911135	29.6889413	0.068581454
18.93230184	×ÔÉí³µÁ¾	Road 1	130.9357709	68.64694519	-3.52E-05	0.338993847	0.192156866	0	147.889	982.9541	655.7919	0.3207	4.1896	687	1.200373169	0.002772862	29.70812769	0.068625775
18.94894313	×ÔÉí³µÁ¾	Road 1	131.2531464	68.65769119	-3.79E-05	0.321362585	0.192156866	0	148.156	982.958	655.7919	0.3216	4.1887	688	1.217118559	0.002811544	29.7283821	0.068672563
18.96606753	×ÔÉí³µÁ¾	Road 1	131.5797858	68.66819	-3.93E-05	0.208972991	0.192156866	0	148.5565	982.9619	655.7918	0.325	4.1854	689	1.197883692	0.002767111	29.74889514	0.068719948
19.01562959	×ÔÉí³µÁ¾	Road 1	132.5253095	68.67925873	-4.12E-05	0.204744413	0.192156866	0	149.3195	982.9717	655.7917	0.3291	4.1804	690	0.966713524	0.002233108	29.79680745	0.068830625
19.03229213	×ÔÉí³µÁ¾	Road 1	132.8432087	68.68321381	-4.36E-05	0.163391516	0.192156866	0	149.7392	982.9766	655.7917	0.3319	4.1777	691	0.975087824	0.002252453	29.8130549	0.068868157
19.04893268	×ÔÉí³µÁ¾	Road 1	133.1606938	68.68441544	-5.52E-05	0.123567015	0.192156866	0	150.1398	982.9814	655.7916	0.3343	4.1753	692	0.877073919	0.002026041	29.82764989	0.068901871
19.06561355	×ÔÉí³µÁ¾	Road 1	133.4789475	68.68425751	-6.00E-05	0.119486712	0.192156866	0	150.4069	982.9844	655.7916	0.3362	4.1734	693	0.834210892	0.001927027	29.84156525	0.068934016
19.0823527	×ÔÉí³µÁ¾	Road 1	133.7983122	68.68404465	-6.63E-05	0.118138298	0.192156866	0	150.674	982.9873	655.7916	0.3382	4.1715	694	0.834209396	0.001927024	29.85552921	0.068966272
19.09894194	×ÔÉí³µÁ¾	Road 1	134.1148124	68.68314514	-7.46E-05	0.101537213	0.192156866	0	151.0746	982.9922	655.7916	0.3406	4.1692	695	0.83420224	0.001927007	29.86936799	0.06899824
19.1156591	×ÔÉí³µÁ¾	Road 1	134.4337466	68.68170319	-8.39E-05	0.088994585	0.192156866	0	151.3417	982.9951	655.7915	0.3425	4.1672	696	0.834191025	0.001926981	29.88331329	0.069030454
19.13236856	×ÔÉí³µÁ¾	Road 1	134.7525208	68.67887421	-9.68E-05	0.085674465	0.192156866	0	151.7423	983	655.7915	0.3449	4.1649	697	0.834169022	0.00192693	29.89725181	0.069062652
19.14894056	×ÔÉí³µÁ¾	Road 1	135.0686638	68.6769722	-0.000114575	0.08557608	0.192156866	0	152.0094	983.0029	655.7914	0.3469	4.163	698	0.834154228	0.001926896	29.91107541	0.069094584
19.16566688	×ÔÉí³µÁ¾	Road 1	135.3877415	68.67496719	-0.000133213	0.081305787	0.200000003	0	152.2764	983.0068	655.7914	0.3478	4.1621	699	0.834138634	0.00192686	29.92502749	0.069126813
19.18232613	×ÔÉí³µÁ¾	Road 1	135.7055226	68.67129364	-0.000154824	0.075363651	0.200000003	0	152.696	983.0117	655.7914	0.3504	4.1594	700	0.834110062	0.001926794	29.93892313	0.069158912
19.19898061	×ÔÉí³µÁ¾	Road 1	136.0232012	68.66878738	-0.000183932	0.073616102	0.200000003	0	152.9631	983.0146	655.7914	0.3522	4.1575	701	0.834090569	0.001926749	29.95281447	0.069191001
19.21566001	×ÔÉí³µÁ¾	Road 1	136.3413438	68.66632919	-0.000214176	0.074992754	0.20784314	0	153.2301	983.0176	655.7913	0.3541	4.1556	702	0.834071449	0.001926705	29.96672629	0.069223138
19.2324087	×ÔÉí³µÁ¾	Road 1	136.660791	68.66271057	-0.00024865	0.074813001	0.20784314	0	153.6306	983.0225	655.7913	0.3564	4.1532	703	0.834043304	0.00192664	29.98069542	0.069255406
19.24895431	×ÔÉí³µÁ¾	Road 1	136.9763537	68.66024551	-0.000291843	0.073609479	0.20784314	0	153.8976	983.0254	655.7913	0.3584	4.1513	704	0.834024132	0.001926596	29.99449485	0.069287283
19.26564361	×ÔÉí³µÁ¾	Road 1	137.2946453	68.65773239	-0.00032831	0.073209174	0.20784314	0	154.1646	983.0293	655.7913	0.3593	4.1504	705	0.834004585	0.001926551	30.00841381	0.069319436
19.28233584	×ÔÉí³µÁ¾	Road 1	137.6129796	68.65471802	-0.000363481	0.074462123	0.215686277	0	154.4507	983.0322	655.7913	0.3616	4.1481	706	0.833982529	0.0019265	30.02233484	0.069351593
19.29922382	×ÔÉí³µÁ¾	Road 1	137.9350323	68.65179291	-0.000398595	0.075733103	0.223529413	0	154.813	983.0361	655.7912	0.3642	4.1455	707	0.833958389	0.001926444	30.03641871	0.069384127
19.3156591	×ÔÉí³µÁ¾	Road 1	138.2484364	68.64835281	-0.000422358	0.07930997	0.223529413	0	155.2134	983.041	655.7911	0.3667	4.1431	708	0.833931633	0.001926382	30.05012461	0.069415788
19.33236746	×ÔÉí³µÁ¾	Road 1	138.5670379	68.64618988	-0.000439066	0.081507742	0.223529413	0	155.4803	983.0449	655.7911	0.3676	4.1422	709	0.83391481	0.001926343	30.06405796	0.069447974
19.3489171	×ÔÉí³µÁ¾	Road 1	138.8826034	68.64411621	-0.000443311	0.082381062	0.223529413	0	155.7473	983.0479	655.7911	0.3695	4.1403	710	0.833898682	0.001926306	30.07785868	0.069479854
19.36567935	×ÔÉí³µÁ¾	Road 1	139.2022073	68.64079971	-0.000443311	0.084531181	0.23137255	0	156.1858	983.0527	655.7911	0.3726	4.1373	711	0.833872887	0.001926246	30.09183627	0.069512142
19.38234556	×ÔÉí³µÁ¾	Road 1	139.5199712	68.63889084	-0.000443311	0.086294793	0.239215687	0	156.4527	983.0557	655.791	0.3746	4.1354	712	0.83385804	0.001926212	30.10573352	0.069544244
19.39970382	×ÔÉí³µÁ¾	Road 1	139.8509177	68.63630905	-0.000443311	0.089388199	0.239215687	0	156.8531	983.0605	655.791	0.377	4.133	713	0.833837959	0.001926166	30.1202075	0.069577679
19.41597818	×ÔÉí³µÁ¾	Road 1	140.161192	68.63479843	-0.000443311	0.094378598	0.247058824	0	157.1199	983.0645	655.791	0.3779	4.1321	714	0.83382621	0.001926139	30.13377749	0.069609026
19.43229286	×ÔÉí³µÁ¾	Road 1	140.4722287	68.63342514	-0.000443311	0.097221248	0.254901975	0	157.3868	983.0674	655.791	0.3799	4.1302	715	0.833815529	0.001926114	30.14738092	0.06964045
19.44903055	×ÔÉí³µÁ¾	Road 1	140.7913219	68.63166733	-0.000441185	0.102911614	0.262745112	0	157.7872	983.0723	655.7909	0.3823	4.1278	716	0.833801857	0.001926082	30.16133684	0.069672688
19.46559376	×ÔÉí³µÁ¾	Road 1	141.1070847	68.63080215	-0.000439066	0.108552083	0.262745112	0	158.054	983.0752	655.7909	0.3852	4.1259	717	0.833795128	0.001926067	30.17514716	0.06970459
19.51574157	×ÔÉí³µÁ¾	Road 1	142.0630885	68.62938766	-0.000435374	0.119262055	0.270588249	0	158.8737	983.085	655.7908	0.3903	4.1208	718	0.833784126	0.001926041	30.21695961	0.069801177
19.53232384	×ÔÉí³µÁ¾	Road 1	142.3792077	68.62928467	-0.000427013	0.123792402	0.278431386	0	159.274	983.0898	655.7908	0.3927	4.1185	719	0.833783325	0.001926039	30.23078563	0.069833115
19.54896879	×ÔÉí³µÁ¾	Road 1	142.6965231	68.62954559	-0.000398099	0.129012823	0.278431386	0	159.6743	983.0947	655.7907	0.3951	4.1161	720	0.843082659	0.001947521	30.24481869	0.069865531
19.56561997	×ÔÉí³µÁ¾	Road 1	143.013959	68.62993011	-0.000385841	0.132053122	0.286274523	0	159.9412	983.0977	655.7907	0.3971	4.1142	721	0.847484573	0.001957689	30.25893031	0.069898129
19.58234519	×ÔÉí³µÁ¾	Road 1	143.3328089	68.63045883	-0.000374788	0.135296777	0.286274523	0	160.2081	983.1006	655.7906	0.399	4.1122	722	0.852541523	0.001969371	30.27318926	0.069931067
19.5989927	×ÔÉí³µÁ¾	Road 1	143.6501826	68.6315712	-0.000364882	0.139880568	0.294117659	0	160.6084	983.1055	655.7906	0.4014	4.1098	723	0.873431801	0.002017627	30.28772973	0.069964656
19.61563032	×ÔÉí³µÁ¾	Road 1	143.9673719	68.63252563	-0.000355612	0.144397587	0.294117659	0	160.8753	983.1094	655.7906	0.4024	4.1089	724	0.867833384	0.002004695	30.30216841	0.069998009
19.63230129	×ÔÉí³µÁ¾	Road 1	144.2852055	68.63431778	-0.000349217	0.148556307	0.294117659	0	161.2756	983.1143	655.7906	0.4048	4.1065	725	0.897584305	0.00207342	30.31713201	0.070032575
19.64897483	×ÔÉí³µÁ¾	Road 1	144.6030941	68.63563614	-0.000342899	0.150270179	0.294117659	0	161.5425	983.1172	655.7905	0.4067	4.1046	726	0.880731827	0.002034491	30.33181693	0.070066497
19.66558753	×ÔÉí³µÁ¾	Road 1	144.9198292	68.6370575	-0.000337989	0.151973754	0.286274523	0	161.8094	983.1201	655.7905	0.4086	4.1027	727	0.884593087	0.00204341	30.3465124	0.070100444
19.68230725	×ÔÉí³µÁ¾	Road 1	145.2386149	68.6392067	-0.000335773	0.15112716	0.278431386	0	162.2098	983.125	655.7905	0.411	4.1003	728	0.910108109	0.00210235	30.36172916	0.070135594
19.69899252	×ÔÉí³µÁ¾	Road 1	145.5567501	68.64058685	-0.000332247	0.149807051	0.278431386	0	162.4767	983.1279	655.7905	0.413	4.0984	729	0.882937729	0.002039586	30.37646121	0.070169625
19.71570308	×ÔÉí³µÁ¾	Road 1	145.8753746	68.64211121	-0.000331808	0.14807038	0.270588249	0	162.7436	983.1318	655.7904	0.4139	4.0974	730	0.887995056	0.002051269	30.39130011	0.070203903
19.73225712	×ÔÉí³µÁ¾	Road 1	146.191019	68.64304504	-0.000331808	0.146330297	0.262745112	0	163.0105	983.1348	655.7904	0.4158	4.0955	731	0.867354057	0.002003588	30.40565832	0.070237071
19.74895779	×ÔÉí³µÁ¾	Road 1	146.5094675	68.64484406	-0.000331808	0.141746923	0.262745112	0	163.4681	983.1406	655.7903	0.4182	4.093	732	0.897806478	0.002073933	30.42065229	0.070271707
19.76558001	×ÔÉí³µÁ¾	Road 1	146.8264241	68.64568176	-0.000330931	0.138508588	0.262745112	0	163.7351	983.1436	655.7903	0.4201	4.0911	733	0.863807812	0.001995396	30.43501069	0.070304875
19.78231587	×ÔÉí³µÁ¾	Road 1	147.1455524	68.64674606	-0.000328746	0.136368439	0.262745112	0	164.1355	983.1484	655.7903	0.4224	4.0887	734	0.871645592	0.002013501	30.44959843	0.070338572
19.79896081	×ÔÉí³µÁ¾	Road 1	147.4629503	68.64739151	-0.00032657	0.135486647	0.262745112	0	164.4024	983.1514	655.7903	0.4243	4.0868	735	0.856928667	0.001979505	30.46386196	0.070371521
19.81651629	×ÔÉí³µÁ¾	Road 1	147.7977136	68.64799576	-0.000323109	0.134793207	0.262745112	0	164.6694	983.1543	655.7902	0.4262	4.0849	736	0.854348195	0.001973544	30.47886045	0.070406168
19.83236251	×ÔÉí³µÁ¾	Road 1	148.0998872	68.64883347	-0.000317963	0.132890016	0.262745112	0	165.0889	983.1602	655.7902	0.4279	4.0831	737	0.865297837	0.001998838	30.49257215	0.070437842
19.84897997	×ÔÉí³µÁ¾	Road 1	148.4167696	68.64930038	-0.000309509	0.132009998	0.262745112	0	165.3558	983.1631	655.7902	0.4298	4.0812	738	0.850608581	0.001964906	30.5067071	0.070470493
19.865659	×ÔÉí³µÁ¾	Road 1	148.7348284	68.64975357	-0.000301618	0.13199003	0.262745112	0	165.6228	983.166	655.7902	0.4317	4.0793	739	0.850062196	0.001963644	30.52088532	0.070503245
19.88248686	×ÔÉí³µÁ¾	Road 1	149.0557272	68.65018616	-0.000293862	0.131309986	0.262745112	0	165.8897	983.1689	655.7901	0.4336	4.0774	740	0.849196868	0.001961645	30.53517549	0.070536255
19.89891701	×ÔÉí³µÁ¾	Road 1	149.369044	68.65064621	-0.000288232	0.131119296	0.262745112	0	166.1948	983.1729	655.7901	0.4352	4.0757	741	0.850561479	0.001964797	30.54915034	0.070568537
19.91560521	×ÔÉí³µÁ¾	Road 1	149.6872847	68.65128479	-0.000284256	0.130244702	0.262745112	0	166.6524	983.1787	655.79	0.4376	4.0733	742	0.856656518	0.001978877	30.56344639	0.070601561
19.93237662	×ÔÉí³µÁ¾	Road 1	150.0071138	68.65164185	-0.00028386	0.130237833	0.262745112	0	166.9194	983.1816	655.79	0.4395	4.0714	743	0.846587965	0.001955618	30.57764487	0.07063436
19.94899628	×ÔÉí³µÁ¾	Road 1	150.3240513	68.65214996	-0.00028386	0.129567787	0.254901975	0	167.3198	983.1865	655.79	0.4419	4.069	744	0.852099936	0.001968351	30.59180647	0.070667073
19.96565955	×ÔÉí³µÁ¾	Road 1	150.6418219	68.65242462	-0.00028386	0.1276225	0.247058824	0	167.5868	983.1904	655.79	0.4428	4.068	745	0.843742433	0.001949045	30.60586599	0.07069955
19.9830783	×ÔÉí³µÁ¾	Road 1	150.9740002	68.65256882	-0.00028386	0.124155395	0.239215687	0	167.8538	983.1934	655.7899	0.4447	4.0661	746	0.838875813	0.001937803	30.62047815	0.070733305
19.99894762	×ÔÉí³µÁ¾	Road 1	151.2766299	68.65242462	-0.00028386	0.118075006	0.223529413	0	168.2542	983.1982	655.7899	0.447	4.0637	747	0.833963303	0.001926455	30.63371258	0.070763876
20.01565158	×ÔÉí³µÁ¾	Road 1	151.5951746	68.65201263	-0.00028386	0.111743368	0.20784314	0	168.5212	983.2012	655.7899	0.4489	4.0618	748	0.833960098	0.001926448	30.64764302	0.070796055
20.03276279	×ÔÉí³µÁ¾	Road 1	151.921482	68.65129166	-0.00028386	0.106311083	0.200000003	0	168.7881	983.2041	655.7899	0.4508	4.0599	749	0.833954491	0.001926435	30.66191299	0.070829019
20.04897154	×ÔÉí³µÁ¾	Road 1	152.2305713	68.64945145	-0.00028386	0.09455014	0.184313729	0	169.2076	983.21	655.7898	0.4525	4.0582	750	0.833940178	0.001926402	30.67543011	0.070860244
20.06563261	×ÔÉí³µÁ¾	Road 1	152.5482787	68.6478241	-0.00028386	0.087586462	0.176470593	0	169.4746	983.2129	655.7898	0.4544	4.0563	751	0.833927521	0.001926373	30.68932424	0.070892339
20.08224824	×ÔÉí³µÁ¾	Road 1	152.8651101	68.64581909	-0.00028386	0.079735838	0.168627456	0	169.7415	983.2158	655.7898	0.4563	4.0544	752	0.833911926	0.001926337	30.70318021	0.070924346
20.09902808	×ÔÉí³µÁ¾	Road 1	153.1850557	68.64213867	-0.00028386	0.073165365	0.168627456	0	170.1419	983.2207	655.7897	0.4587	4.052	753	0.833883301	0.00192627	30.71717264	0.070956669
20.13249759	×ÔÉí³µÁ¾	Road 1	153.8231729	68.63626099	-0.00028386	0.060954582	0.168627456	0	170.6757	983.2275	655.7897	0.4615	4.0492	754	0.833837585	0.001926165	30.74508077	0.071021137
20.14890097	×ÔÉí³µÁ¾	Road 1	154.1358903	68.63111115	-0.000284256	0.055934235	0.168627456	0	171.0951	983.2324	655.7897	0.4642	4.0465	755	0.833797531	0.001926072	30.75875788	0.071052731
20.16561044	×ÔÉí³µÁ¾	Road 1	154.4544267	68.62763672	-0.000287036	0.053564057	0.192156866	0	171.362	983.2354	655.7896	0.4661	4.0446	756	0.833770508	0.00192601	30.77268973	0.071084913
20.18238698	×ÔÉí³µÁ¾	Road 1	154.7742253	68.62409363	-0.000289833	0.053574063	0.192156866	0	171.6289	983.2393	655.7896	0.467	4.0437	757	0.83374295	0.001925946	30.78667706	0.071117224
20.19950112	×ÔÉí³µÁ¾	Road 1	155.1004338	68.61872406	-0.000295077	0.057485007	0.192156866	0	172.0482	983.2441	655.7896	0.4697	4.041	758	0.833701187	0.00192585	30.80094514	0.071150183
20.2155933	×ÔÉí³µÁ¾	Road 1	155.4071481	68.6154007	-0.000300384	0.057091963	0.192156866	0	172.315	983.2471	655.7896	0.4716	4.0391	759	0.833675339	0.00192579	30.81436079	0.071181173
20.23231632	×ÔÉí³µÁ¾	Road 1	155.7258628	68.61037445	-0.000308254	0.056663331	0.192156866	0	172.7152	983.252	655.7895	0.4739	4.0368	760	0.833636246	0.0019257	30.82830171	0.071213377
20.24903788	×ÔÉí³µÁ¾	Road 1	156.0445339	68.60699615	-0.000314987	0.05601019	0.200000003	0	172.982	983.2559	655.7894	0.4749	4.0359	761	0.83360997	0.001925639	30.84224097	0.071245577
20.26562638	×ÔÉí³µÁ¾	Road 1	156.3606528	68.60345306	-0.00032354	0.058440391	0.200000003	0	173.2678	983.2588	655.7894	0.4772	4.0336	762	0.833582413	0.001925575	30.85606885	0.071277519
20.28318955	×ÔÉí³µÁ¾	Road 1	156.6953225	68.59870148	-0.000335773	0.061723858	0.20784314	0	173.668	983.2637	655.7894	0.4795	4.0313	763	0.833545456	0.00192549	30.87070855	0.071311337
20.29985393	×ÔÉí³µÁ¾	Road 1	157.0128513	68.59565277	-0.000350126	0.063281797	0.20784314	0	173.9347	983.2666	655.7894	0.4815	4.0294	764	0.833521744	0.001925435	30.88459867	0.071343423
20.3156492	×ÔÉí³µÁ¾	Road 1	157.3138069	68.59268646	-0.000368635	0.065048613	0.20784314	0	174.2015	983.2705	655.7894	0.4824	4.0285	765	0.833498672	0.001925382	30.89776401	0.071373835
20.33234693	×ÔÉí³µÁ¾	Road 1	157.6319365	68.5881546	-0.000385841	0.067712016	0.223529413	0	174.6206	983.2754	655.7893	0.4851	4.0258	766	0.833463425	0.001925301	30.91168096	0.071405983
20.34898931	×ÔÉí³µÁ¾	Road 1	157.9489992	68.58548355	-0.000406079	0.072059013	0.223529413	0	174.8873	983.2783	655.7893	0.487	4.0239	767	0.83344265	0.001925253	30.92555143	0.071438024
20.36564599	×ÔÉí³µÁ¾	Road 1	158.2663228	68.58300476	-0.000428573	0.075339288	0.223529413	0	175.154	983.2822	655.7892	0.488	4.023	768	0.83342337	0.001925208	30.93943349	0.071470091
20.38227078	×ÔÉí³µÁ¾	Road 1	158.5830229	68.57953033	-0.000454042	0.078622654	0.223529413	0	175.554	983.2871	655.7892	0.4904	4.0206	769	0.833396347	0.001925146	30.95328853	0.071502097
20.39900847	×ÔÉí³µÁ¾	Road 1	158.9018633	68.57729874	-0.000481625	0.079092652	0.23137255	0	175.8207	983.29	655.7892	0.4923	4.0188	770	0.83337899	0.001925105	30.96723737	0.071534318
20.4159287	×ÔÉí³µÁ¾	Road 1	159.2241661	68.5741333	-0.000509134	0.084083065	0.239215687	0	176.2207	983.2949	655.7892	0.4947	4.0164	771	0.83335437	0.001925049	30.98133792	0.071566891
20.4322991	×ÔÉí³µÁ¾	Road 1	159.5359871	68.57228622	-0.000538277	0.08846724	0.239215687	0	176.4874	983.2979	655.7891	0.4966	4.0145	772	0.833340004	0.001925015	30.99498002	0.071598404
20.44891472	×ÔÉí³µÁ¾	Road 1	159.8524715	68.57062454	-0.00056914	0.091354266	0.247058824	0	176.754	983.3018	655.7891	0.4975	4.0136	773	0.83332708	0.001924986	31.00882627	0.071630389
20.48259793	×ÔÉí³µÁ¾	Road 1	160.4940179	68.56730804	-0.000597257	0.09834329	0.247058824	0	177.3825	983.3096	655.7891	0.5021	4.0101	774	0.833301285	0.001924926	31.03689454	0.071695226
20.54890207	×ÔÉí³µÁ¾	Road 1	161.7567871	68.56237106	-0.000625615	0.106624842	0.247058824	0	178.6965	983.3252	655.7889	0.5103	4.002	775	0.833262886	0.001924837	31.09214332	0.071822851
20.56620646	×ÔÉí³µÁ¾	Road 1	162.0863473	68.56162949	-0.000694285	0.10769783	0.254901975	0	178.9441	983.3281	655.7889	0.5119	4.0004	776	0.833257118	0.001924824	31.10656232	0.071856159
20.58254276	×ÔÉí³µÁ¾	Road 1	162.3974656	68.56052399	-0.000858687	0.109226085	0.23137255	0	179.3631	983.334	655.7889	0.5137	3.9986	777	0.83324852	0.001924804	31.12017452	0.071887603
20.60091969	×ÔÉí³µÁ¾	Road 1	162.7474411	68.55943909	-0.000908418	0.104848534	0.20784314	0	179.7249	983.3379	655.7888	0.5163	3.996	778	0.833240082	0.001924785	31.13548691	0.071922975
20.63226354	×ÔÉí³µÁ¾	Road 1	163.3443512	68.55815506	-0.000966282	0.096571937	0.192156866	0	180.0296	983.3418	655.7888	0.518	3.9943	779	0.833230095	0.001924762	31.16160355	0.071983304
20.64891875	×ÔÉí³µÁ¾	Road 1	163.6615142	68.55433044	-0.001017265	0.083048657	0.168627456	0	180.6199	983.3496	655.7888	0.5209	3.9914	780	0.833200348	0.001924693	31.17548068	0.07201536
20.66564178	×ÔÉí³µÁ¾	Road 1	163.9799583	68.55211945	-0.001124547	0.075832576	0.129411772	0	180.8864	983.3525	655.7888	0.5228	3.9895	781	0.833183151	0.001924653	31.18941402	0.072047546
20.68230285	×ÔÉí³µÁ¾	Road 1	164.2972103	68.54941406	-0.001178862	0.063394122	0.105882354	0	181.153	983.3555	655.7887	0.5247	3.9876	782	0.833162109	0.001924604	31.2032954	0.072079612
20.69890748	×ÔÉí³µÁ¾	Road 1	164.6133607	68.54363937	-0.001241233	0.038238477	0.082352944	0	181.5719	983.3613	655.7887	0.5264	3.9858	783	0.833117195	0.001924501	31.217129	0.072111568
20.71567192	×ÔÉí³µÁ¾	Road 1	164.9325325	68.53899765	-0.001297034	0.02572507	0.05882353	0	181.8384	983.3643	655.7886	0.5283	3.9839	784	0.833081093	0.001924417	31.23109514	0.07214383
20.73233373	×ÔÉí³µÁ¾	Road 1	165.2497128	68.53092957	-0.00134777	0.013887808	0.043137256	0	182.2382	983.3691	655.7886	0.5307	3.9816	785	0.833018341	0.001924272	31.24497474	0.072175892
20.74893543	×ÔÉí³µÁ¾	Road 1	165.5657204	68.52476349	-0.001402105	-0.004961262	0.019607844	0	182.5046	983.373	655.7886	0.5317	3.9806	786	0.832970383	0.001924162	31.25880346	0.072207836
20.7656306	×ÔÉí³µÁ¾	Road 1	165.8834755	68.5179451	-0.001448484	-0.018604543	0	0	182.7711	983.376	655.7886	0.5336	3.9797	787	0.832917351	0.001924039	31.27270915	0.072239958
20.78227554	×ÔÉí³µÁ¾	Road 1	166.2002206	68.50619659	-0.001494677	-0.046179622	0	0	183.1707	983.3809	655.7885	0.5359	3.9773	788	0.832825974	0.001923828	31.2865715	0.07227198
20.79896961	×ÔÉí³µÁ¾	Road 1	166.5178559	68.49663162	-0.00154551	-0.098681785	0	0.011764706	183.4371	983.3848	655.7885	0.5369	3.9764	789	0.832751579	0.001923656	31.30047351	0.072304094
20.81564352	×ÔÉí³µÁ¾	Road 1	166.835032	68.48028259	-0.00158625	-0.20009166	0	0.011764706	183.7034	983.3877	655.7885	0.5388	3.9745	790	0.83262442	0.001923362	31.31435661	0.072336164
20.83226281	×ÔÉí³µÁ¾	Road 1	167.1510525	68.45501404	-0.001622637	-0.215791166	0	0.011764706	184.1218	983.3936	655.7885	0.5415	3.9727	791	0.832427887	0.001922908	31.32819097	0.072368121
20.85053416	×ÔÉí³µÁ¾	Road 1	167.498419	68.44151459	-0.001666002	-0.168057978	0	0.011764706	184.3499	983.3965	655.7885	0.5427	3.9715	792	0.832322891	0.001922666	31.34339864	0.072403251
20.86555417	×ÔÉí³µÁ¾	Road 1	167.7838819	68.41985779	-0.001694469	-0.157693386	0	0.011764706	184.7681	983.4014	655.7884	0.5454	3.9688	793	0.832154449	0.001922277	31.3558976	0.072432123
20.88222881	×ÔÉí³µÁ¾	Road 1	168.1007212	68.40455933	-0.001721943	-0.201231867	0	0.011764706	185.0341	983.4053	655.7884	0.5464	3.9679	794	0.832035461	0.001922002	31.36977149	0.072464172
20.89889942	×ÔÉí³µÁ¾	Road 1	168.4174047	68.38746872	-0.001737774	-0.222729176	0	0.011764706	185.3	983.4082	655.7883	0.5483	3.966	795	0.831902534	0.001921695	31.38363981	0.072496208
20.91561181	×ÔÉí³µÁ¾	Road 1	168.7347651	68.3622963	-0.001749712	-0.192290589	0	0.011764706	185.6989	983.4141	655.7883	0.5496	3.9646	796	0.831706749	0.001921243	31.39753962	0.072528317
20.93229231	×ÔÉí³µÁ¾	Road 1	169.0514485	68.34685364	-0.001755035	-0.179615214	0	0.011764706	185.9647	983.417	655.7883	0.5515	3.9627	797	0.831586639	0.001920965	31.41141091	0.072560359
20.94896512	×ÔÉí³µÁ¾	Road 1	169.3679138	68.33134918	-0.001755035	-0.192331642	0	0.011764706	186.2304	983.4209	655.7883	0.5525	3.9618	798	0.831466049	0.001920687	31.42527378	0.072592382
20.96553786	×ÔÉí³µÁ¾	Road 1	169.6823596	68.30522919	-0.001755035	-0.21569328	0	0.011764706	186.6479	983.4258	655.7883	0.5552	3.9591	799	0.831262894	0.001920217	31.43905008	0.072624206
20.98221763	×ÔÉí³µÁ¾	Road 1	169.9987577	68.28831024	-0.001755035	-0.208548903	0	0.011764706	186.9134	983.4297	655.7882	0.5561	3.9581	800	0.831131302	0.001919913	31.45291316	0.072656229
20.99894395	×ÔÉí³µÁ¾	Road 1	170.3159629	68.27194748	-0.001755035	-0.196516857	0	0.011764706	187.179	983.4326	655.7881	0.559	3.9562	801	0.831004036	0.001919619	31.4668128	0.072688338
21.01553575	×ÔÉí³µÁ¾	Road 1	170.6305007	68.24672699	-0.001755035	-0.198581979	0	0.011764706	187.5961	983.4385	655.7877	0.5607	3.9545	802	0.830807877	0.001919166	31.4805974	0.07272018
21.03228517	×ÔÉí³µÁ¾	Road 1	170.9479444	68.22909393	-0.001755035	-0.207000762	0	0.011764706	187.8804	983.4424	655.7874	0.5619	3.9533	803	0.830670731	0.001918849	31.49451065	0.07275232
21.04891948	×ÔÉí³µÁ¾	Road 1	171.2631297	68.21242218	-0.001755035	-0.20671919	0	0.011764706	188.1456	983.4453	655.787	0.5638	3.9514	804	0.830541061	0.00191855	31.50832613	0.072784233
21.0655758	×ÔÉí³µÁ¾	Road 1	171.5786185	68.18795013	-0.001755035	-0.200021118	0	0.011764706	188.4108	983.4492	655.7866	0.5647	3.9505	805	0.830350723	0.00191811	31.52215671	0.072816182
21.08254441	×ÔÉí³µÁ¾	Road 1	171.8999476	68.17199936	-0.001755035	-0.193185672	0	0.011764706	188.8085	983.4541	655.7858	0.5671	3.9481	806	0.830226662	0.001917824	31.53624451	0.072848725
21.09889208	×ÔÉí³µÁ¾	Road 1	172.2094455	68.15604172	-0.001755035	-0.194634214	0	0.011764706	189.0736	983.458	655.7852	0.568	3.9472	807	0.830102547	0.001917537	31.54981476	0.072880072
21.11564663	×ÔÉí³µÁ¾	Road 1	172.5265294	68.13086243	-0.001755035	-0.19321768	0	0.011764706	189.49	983.4639	655.784	0.5697	3.9455	808	0.829906708	0.001917084	31.56371947	0.072912192
21.13241474	×ÔÉí³µÁ¾	Road 1	172.8437963	68.11506958	-0.001755035	-0.188325629	0	0.011764706	189.7549	983.4678	655.7832	0.5716	3.9446	809	0.829783875	0.001916801	31.57763338	0.072944333
21.14893763	×ÔÉí³µÁ¾	Road 1	173.1563521	68.09953079	-0.001755035	-0.183183581	0	0.011764706	190.0197	983.4707	655.7823	0.5734	3.9427	810	0.829663017	0.001916522	31.5913418	0.072976
21.16561117	×ÔÉí³µÁ¾	Road 1	173.4716812	68.08302383	-0.001755035	-0.182158038	0	0.011764706	190.3034	983.4746	655.7813	0.5747	3.9415	811	0.82953463	0.001916225	31.60517308	0.07300795
21.18245662	×ÔÉí³µÁ¾	Road 1	173.7901744	68.06438141	-0.001755035	-0.181025535	0	0.011764706	190.6248	983.4795	655.78	0.5756	3.9405	812	0.829389633	0.00191589	31.61914453	0.073040224
21.19889447	×ÔÉí³µÁ¾	Road 1	174.1008469	68.03940125	-0.001755035	-0.175392166	0	0.011764706	191.0596	983.4854	655.7781	0.5777	3.9385	813	0.829195343	0.001915441	31.63277471	0.07307171
21.21554565	×ÔÉí³µÁ¾	Road 1	174.4154823	68.02443924	-0.001755035	-0.171460047	0	0.011764706	191.3241	983.4883	655.7769	0.5796	3.9366	814	0.829078972	0.001915172	31.64657985	0.073103599
21.23240026	×ÔÉí³µÁ¾	Road 1	174.7338924	68.0096489	-0.001755035	-0.168867648	0	0.011764706	191.5886	983.4922	655.7756	0.5805	3.9357	815	0.828963936	0.001914907	31.66055172	0.073135874
21.24886377	×ÔÉí³µÁ¾	Road 1	175.0448082	67.98655701	-0.001755035	-0.167485625	0	0.011764706	192.0041	983.498	655.7734	0.5831	3.934	816	0.828784332	0.001914492	31.67419642	0.073167394
21.26559046	×ÔÉí³µÁ¾	Road 1	175.3606266	67.97196579	-0.001755035	-0.164150134	0	0.011764706	192.2684	983.502	655.7719	0.584	3.9332	817	0.828670845	0.00191423	31.68805734	0.073199412
21.2822552	×ÔÉí³µÁ¾	Road 1	175.6752082	67.95747757	-0.001755035	-0.161465555	0	0.011764706	192.5327	983.5059	655.7703	0.5849	3.9323	818	0.828558159	0.001913969	31.70186505	0.073231308
21.29887925	×ÔÉí³µÁ¾	Road 1	175.988951	67.94215164	-0.001755035	-0.159025565	0	0.011764706	192.8158	983.5098	655.7686	0.5861	3.931	819	0.828438957	0.001913694	31.71563706	0.073263122
21.31559312	×ÔÉí³µÁ¾	Road 1	176.3043086	67.92490311	-0.001755035	-0.156353071	0	0.011764706	193.1366	983.5137	655.7665	0.5881	3.9291	820	0.828304802	0.001913384	31.72948123	0.073295102
21.33223476	×ÔÉí³µÁ¾	Road 1	176.618192	67.90074692	-0.001755035	-0.15342921	0	0.011764706	193.5893	983.5205	655.7634	0.5894	3.9277	821	0.82811692	0.00191295	31.74326246	0.073326936
21.34888118	×ÔÉí³µÁ¾	Road 1	176.932101	67.88681488	-0.001749712	-0.152277052	0	0.011764706	193.8533	983.5234	655.7614	0.5913	3.9268	822	0.82800856	0.0019127	31.75704584	0.073358776
21.36558404	×ÔÉí³µÁ¾	Road 1	177.2469962	67.8699646	-0.001737774	-0.149195746	0	0.011764706	194.1173	983.5273	655.7595	0.5922	3.926	823	0.827877502	0.001912397	31.77087376	0.073390718
21.38223082	×ÔÉí³µÁ¾	Road 1	177.5607527	67.85237274	-0.001725891	-0.146838278	0	0.011764706	194.5131	983.5332	655.7563	0.5945	3.9246	824	0.827740677	0.001912081	31.78465298	0.073422548
21.39896521	×ÔÉí³µÁ¾	Road 1	177.8760973	67.83877716	-0.001698376	-0.145056531	0	0.011764706	194.7769	983.5371	655.7542	0.5954	3.9237	825	0.827634933	0.001911837	31.79850294	0.073454542
21.41555298	×ÔÉí³µÁ¾	Road 1	178.1885857	67.81854858	-0.001666002	-0.140940294	0	0.011764706	195.1725	983.543	655.7508	0.5967	3.9224	826	0.8274776	0.001911473	31.81222895	0.073486249
21.43225914	×ÔÉí³µÁ¾	Road 1	178.5032424	67.80517273	-0.001628967	-0.13933827	0	0.011764706	195.4362	983.5459	655.7485	0.5986	3.9206	827	0.827373566	0.001911233	31.82605119	0.073518178
21.44893891	×ÔÉí³µÁ¾	Road 1	178.8173408	67.79194107	-0.001581274	-0.137988359	0	0.011764706	195.6999	983.5498	655.7461	0.5994	3.9197	828	0.827270653	0.001910995	31.83984987	0.073550053
21.46559192	×ÔÉí³µÁ¾	Road 1	179.1308438	67.77218628	-0.001539399	-0.134098038	0	0.011764706	196.0952	983.5557	655.7423	0.6008	3.9184	829	0.827117004	0.00191064	31.85362386	0.073581871
21.48233914	×ÔÉí³µÁ¾	Road 1	179.4460598	67.75917435	-0.001489894	-0.131463841	0	0.011764706	196.3588	983.5596	655.7397	0.6016	3.9175	830	0.8270158	0.001910406	31.86747407	0.073613865
21.49890161	×ÔÉí³µÁ¾	Road 1	179.7577099	67.73988647	-0.001425168	-0.129502028	0	0.011764706	196.7539	983.5654	655.7357	0.6039	3.9162	831	0.826865784	0.00191006	31.88116902	0.0736455
21.51560301	×ÔÉí³µÁ¾	Road 1	180.0719147	67.72711487	-0.001362344	-0.12707594	0	0.011764706	197.0173	983.5693	655.733	0.6048	3.9153	832	0.826766449	0.00190983	31.89497717	0.073677397
21.53233264	×ÔÉí³µÁ¾	Road 1	180.3865916	67.71442566	-0.00129377	-0.125244498	0	0.011764706	197.2807	983.5732	655.7302	0.6057	3.9144	833	0.826667755	0.001909603	31.90880701	0.073709344
21.54894386	×ÔÉí³µÁ¾	Road 1	180.6989835	67.70186005	-0.001213942	-0.123017825	0	0.011764706	197.544	983.5762	655.7272	0.6075	3.9125	834	0.826570023	0.001909377	31.92253735	0.073741061
21.56553566	×ÔÉí³µÁ¾	Road 1	181.010916	67.68145294	-0.001137467	-0.119530857	0	0.011764706	197.9764	983.583	655.7223	0.6085	3.9115	835	0.826411301	0.00190901	31.936249	0.073772735
21.5823166	×ÔÉí³µÁ¾	Road 1	181.3263389	67.66739044	-0.001061413	-0.116824776	0	0.011764706	198.2772	983.5869	655.7188	0.6101	3.9099	836	0.826301926	0.001908757	31.95011513	0.073804766
21.59889043	×ÔÉí³µÁ¾	Road 1	181.6378131	67.65525055	-0.000974358	-0.114431396	0	0.011764706	198.5403	983.5908	655.7156	0.611	3.909	837	0.826207504	0.001908539	31.96380855	0.073836398
21.6155889	×ÔÉí³µÁ¾	Road 1	181.9515456	67.63718491	-0.000900711	-0.111149408	0	0.011764706	198.9349	983.5967	655.7107	0.6123	3.9077	838	0.826066994	0.001908215	31.9776026	0.073868262
21.66565974	×ÔÉí³µÁ¾	Road 1	182.8917408	67.59828644	-0.000831681	-0.103979796	0	0.011764706	199.7988	983.6094	655.6995	0.6162	3.9049	839	0.82576445	0.001907516	32.01894932	0.073963773
21.68228489	×ÔÉí³µÁ¾	Road 1	183.2038364	67.5809761	-0.000760154	-0.10152562	0	0.011764706	200.1931	983.6152	655.6941	0.6175	3.9037	840	0.825629814	0.001907205	32.03267554	0.073995481
21.69894487	×ÔÉí³µÁ¾	Road 1	183.5165332	67.56962585	-0.000599207	-0.097837955	0	0.011764706	200.4559	983.6191	655.6904	0.6184	3.9028	841	0.825541534	0.001907001	32.04642905	0.074027251
21.71557552	×ÔÉí³µÁ¾	Road 1	183.8286278	67.55840607	-0.000561006	-0.096264854	0	0.011764706	200.7186	983.623	655.6867	0.6192	3.902	842	0.825454269	0.001906799	32.06015689	0.074058962
21.7322146	×ÔÉí³µÁ¾	Road 1	184.1408033	67.54168625	-0.000525655	-0.091729775	0	0.011764706	201.1126	983.6289	655.681	0.6205	3.9007	843	0.825324226	0.001906499	32.07388953	0.074090685
21.74887238	×ÔÉí³µÁ¾	Road 1	184.4532787	67.53072052	-0.000490682	-0.089240648	0	0.011764706	201.3753	983.6328	655.677	0.6212	3.8999	844	0.825238937	0.001906302	32.08763618	0.07412244
21.76555252	×ÔÉí³µÁ¾	Road 1	184.7661194	67.51902008	-0.000465495	-0.087946683	0	0.011764706	201.6379	983.6367	655.673	0.6219	3.899	845	0.825147934	0.001906092	32.10139976	0.074154233
21.7822136	×ÔÉí³µÁ¾	Road 1	185.0785323	67.50381775	-0.000441185	-0.084254123	0	0.011764706	202.0317	983.6426	655.6669	0.623	3.8978	846	0.825029694	0.001905819	32.11514564	0.074185986
21.79891683	×ÔÉí³µÁ¾	Road 1	185.3916863	67.49318848	-0.000417736	-0.081355602	0	0.011764706	202.2942	983.6465	655.6628	0.6237	3.8969	847	0.824947021	0.001905628	32.12892492	0.074217817
21.81553868	×ÔÉí³µÁ¾	Road 1	185.7032428	67.47763596	-0.000401578	-0.077928744	0	0.011764706	202.6878	983.6523	655.6564	0.6249	3.8956	848	0.824826057	0.001905348	32.14263506	0.074249487
21.83224741	×ÔÉí³µÁ¾	Road 1	186.01638	67.46737747	-0.000385841	-0.075898312	0	0.011764706	202.9502	983.6563	655.652	0.6259	3.8948	849	0.824746269	0.001905164	32.15641552	0.07428132
21.84890592	×ÔÉí³µÁ¾	Road 1	186.3285256	67.45645294	-0.000372887	-0.073034495	0	0.011764706	203.2313	983.6602	655.6473	0.6272	3.8936	850	0.824661301	0.001904968	32.17015315	0.074313054
21.86553071	×ÔÉí³µÁ¾	Road 1	186.63997	67.4414566	-0.000363015	-0.068664022	0	0.011764706	203.6248	983.666	655.6406	0.6296	3.8923	851	0.824544662	0.001904698	32.18386103	0.074344719
21.88225777	×ÔÉí³µÁ¾	Road 1	186.9532845	67.43158264	-0.000354235	-0.06686049	0	0.011764706	203.887	983.6699	655.636	0.6305	3.8915	852	0.824467865	0.001904521	32.19765195	0.074376576
21.89900535	×ÔÉí³µÁ¾	Road 1	187.2669382	67.42186661	-0.0003465	-0.06358128	0	0.011764706	204.1492	983.6738	655.6313	0.6314	3.8907	853	0.824392296	0.001904346	32.21145853	0.074408469
21.91557332	×ÔÉí³µÁ¾	Road 1	187.5771839	67.41227417	-0.000339323	-0.061774381	0	0.011764706	204.4114	983.6777	655.6266	0.6324	3.8898	854	0.824317688	0.001904174	32.2251158	0.074440018
21.93219334	×ÔÉí³µÁ¾	Road 1	187.8883293	67.396035	-0.000330931	-0.057382334	0	0.011764706	204.8608	983.6846	655.6184	0.6337	3.8885	855	0.824191383	0.001903882	32.23881388	0.07447166
21.94889621	×ÔÉí³µÁ¾	Road 1	188.2009827	67.38676529	-0.000323109	-0.055643588	0	0.011764706	205.1229	983.6885	655.6134	0.6345	3.8877	856	0.824119286	0.001903716	32.25257903	0.074503458
21.96552613	×ÔÉí³µÁ¾	Road 1	188.5122282	67.37759857	-0.000314563	-0.05253337	0	0.011764706	205.3849	983.6924	655.6085	0.6354	3.8868	857	0.824047989	0.001903551	32.26628289	0.074535113
21.98218867	×ÔÉí³µÁ¾	Road 1	188.8240219	67.36409912	-0.000308254	-0.049278315	0	0.011764706	205.778	983.6982	655.6009	0.6366	3.8856	858	0.823942993	0.001903308	32.28001187	0.074566827
21.99884938	×ÔÉí³µÁ¾	Road 1	189.1357401	67.35519333	-0.000299974	-0.04664816	0	0.011764706	206.0399	983.7012	655.5956	0.6384	3.8838	859	0.823873726	0.001903148	32.29373819	0.074598535
22.01550533	×ÔÉí³µÁ¾	Road 1	189.4473089	67.3421814	-0.000293053	-0.042339556	0	0.011764706	206.4328	983.707	655.5878	0.6397	3.8825	860	0.823772522	0.001902915	32.3074589	0.07463023
22.03217813	×ÔÉí³µÁ¾	Road 1	189.7591504	67.33298035	-0.000287036	-0.040739637	0	0.011764706	206.7134	983.7119	655.5821	0.6399	3.8823	861	0.823700958	0.001902749	32.32119231	0.074661954
22.04886303	×ÔÉí³µÁ¾	Road 1	190.0711792	67.32454147	-0.000280709	-0.037218168	0	0.011764706	206.9753	983.7158	655.5767	0.6407	3.8815	862	0.823635323	0.001902598	32.33493458	0.074693699
22.06561062	×ÔÉí³µÁ¾	Road 1	190.3843225	67.31214752	-0.000274862	-0.033979814	0	0.011764706	207.368	983.7217	655.5684	0.642	3.8802	863	0.823538925	0.001902375	32.34872687	0.074725559
22.08219399	×ÔÉí³µÁ¾	Road 1	190.694358	67.30405884	-0.000268335	-0.030698502	0	0.011764706	207.6298	983.7256	655.5629	0.6428	3.8794	864	0.823476013	0.00190223	32.36238288	0.074757104
22.09885396	×ÔÉí³µÁ¾	Road 1	191.0057888	67.29606628	-0.000262287	-0.028898453	0	0.011764706	207.8915	983.7295	655.5573	0.6436	3.8786	865	0.823413849	0.001902086	32.37610093	0.074788793
22.11562317	×ÔÉí³µÁ¾	Road 1	191.3192065	67.28423538	-0.000257811	-0.025240336	0	0.011764706	208.2841	983.7354	655.5486	0.6449	3.8773	866	0.823321831	0.001901873	32.38990739	0.074820686
22.13227765	×ÔÉí³µÁ¾	Road 1	191.6304425	67.27619476	-0.000253386	-0.046227787	0	0.019607844	208.5457	983.7393	655.5428	0.6457	3.8765	867	0.823259293	0.001901729	32.40361834	0.074852358
22.14891527	×ÔÉí³µÁ¾	Road 1	191.941315	67.26569595	-0.000250828	-0.107070304	0	0.019607844	208.8074	983.7432	655.5369	0.6465	3.8756	868	0.823177635	0.00190154	32.41731406	0.074883995
22.16552686	×ÔÉí³µÁ¾	Road 1	192.2516102	67.24597549	-0.000250101	-0.149213895	0	0.027450981	209.1998	983.749	655.528	0.6478	3.8744	869	0.823024254	0.001901186	32.4309858	0.074915577
22.18238075	×ÔÉí³µÁ¾	Road 1	192.5663633	67.23144608	-0.000249012	-0.16262114	0	0.027450981	209.4613	983.7529	655.5219	0.6486	3.8736	870	0.822911247	0.001900925	32.44485505	0.074947615
22.1989051	×ÔÉí³µÁ¾	Road 1	192.8748528	67.20762634	-0.00024865	-0.174474314	0	0.035294119	209.8721	983.7588	655.5122	0.6502	3.872	871	0.822725983	0.001900497	32.45845007	0.07497902
22.21562262	×ÔÉí³µÁ¾	Road 1	193.1868677	67.19017868	-0.00024865	-0.228946	0	0.035294119	210.1335	983.7627	655.506	0.651	3.8711	872	0.822590279	0.001900184	32.47220174	0.075010786
22.23224448	×ÔÉí³µÁ¾	Road 1	193.4970106	67.17145386	-0.00024865	-0.258160174	0	0.043137256	210.3948	983.7666	655.4996	0.6519	3.8703	873	0.822444641	0.001899847	32.4858723	0.075042365
22.24882565	×ÔÉí³µÁ¾	Road 1	193.8062983	67.15062103	-0.00024865	-0.310140043	0	0.050980393	210.656	983.7705	655.4933	0.6527	3.8694	874	0.822282608	0.001899473	32.4995067	0.07507386
22.26554794	×ÔÉí³µÁ¾	Road 1	194.1180328	67.11067886	-0.00024865	-0.366697371	0	0.050980393	211.0849	983.7764	655.4827	0.6546	3.8675	875	0.821971947	0.001898755	32.51325196	0.075105612
22.28415579	×ÔÉí³µÁ¾	Road 1	194.4647916	67.08626862	-0.00024865	-0.349288046	0	0.05882353	211.3459	983.7803	655.4761	0.6554	3.8667	876	0.821782089	0.001898317	32.52854356	0.075140936
22.29947821	×ÔÉí³µÁ¾	Road 1	194.7501595	67.04717789	-0.00024865	-0.445756495	0	0.06666667	211.7372	983.7861	655.4662	0.6566	3.8654	877	0.82147805	0.001897614	32.54113059	0.075170012
22.31556452	×ÔÉí³µÁ¾	Road 1	195.0496127	67.01543427	-0.00024865	-0.545024455	0	0.074509807	211.9979	983.79	655.4595	0.6574	3.8646	878	0.821231155	0.001897044	32.55434117	0.075200528
22.33221277	×ÔÉí³µÁ¾	Road 1	195.35936	66.97943344	-0.00024865	-0.611947417	0	0.082352944	212.2585	983.7939	655.4527	0.6583	3.8638	879	0.820951149	0.001896397	32.56800857	0.0752321
22.34889034	×ÔÉí³µÁ¾	Road 1	195.6693736	66.91915283	-0.00024865	-0.635852337	0	0.090196081	212.6677	983.7998	655.4419	0.6598	3.8622	880	0.8204823	0.001895314	32.58169222	0.075263709
22.36555875	×ÔÉí³µÁ¾	Road 1	195.9790722	66.88791046	-0.00024865	-0.654491723	0	0.098039217	212.7979	983.8018	655.4384	0.6602	3.8618	881	0.820239304	0.001894753	32.5953643	0.075295292
22.38216448	×ÔÉí³µÁ¾	Road 1	196.2873733	66.83742142	-0.00024865	-0.718482614	0	0.098039217	213.188	983.8076	655.4279	0.6614	3.8606	882	0.819846611	0.001893846	32.60897845	0.07532674
22.3996602	×ÔÉí³µÁ¾	Road 1	196.6118806	66.77209396	-0.00024865	-0.752793312	0	0.105882354	213.5778	983.8135	655.4173	0.6626	3.8593	883	0.819338509	0.001892672	32.62331337	0.075359854
22.41552255	×ÔÉí³µÁ¾	Road 1	196.9059933	66.74961319	-0.00024865	-0.77144599	0	0.121568628	213.7076	983.8154	655.4137	0.663	3.8589	884	0.819163658	0.001892268	32.63630723	0.07538987
22.43220892	×ÔÉí³µÁ¾	Road 1	197.2149684	66.65983429	-0.00024865	-0.948705077	0	0.121568628	214.171	983.8223	655.4008	0.6646	3.8573	885	0.818465378	0.001890655	32.64996445	0.075421418
22.4488711	×ÔÉí³µÁ¾	Road 1	197.5232439	66.6054451	-0.00024865	-0.931721985	0	0.121568628	214.4301	983.8262	655.3934	0.6654	3.8565	886	0.818042351	0.001889678	32.66359482	0.075452904
22.46560145	×ÔÉí³µÁ¾	Road 1	197.8325426	66.55419388	-0.00024865	-0.845505655	0	0.121568628	214.6891	983.8301	655.386	0.6662	3.8557	887	0.81764373	0.001888757	32.67727429	0.075484504
22.48219582	×ÔÉí³µÁ¾	Road 1	198.1389781	66.47847061	-0.00024865	-0.859415829	0	0.129411772	215.0957	983.8369	655.3743	0.6668	3.8552	888	0.817054771	0.001887397	32.69083279	0.075515824
22.49880558	×ÔÉí³µÁ¾	Road 1	198.4454511	66.42496719	-0.00024865	-0.999870002	0	0.137254909	215.3542	983.8408	655.3668	0.6676	3.8544	889	0.816638634	0.001886435	32.70439696	0.075547157
22.51632366	×ÔÉí³µÁ¾	Road 1	198.768214	66.3283905	-0.00024865	-1.133418798	0	0.145098045	215.7599	983.8467	655.3548	0.6691	3.8529	890	0.815887482	0.0018847	32.71868975	0.075580173
22.53222413	×ÔÉí³µÁ¾	Road 1	199.0608943	66.26526031	-0.00024865	-1.106242657	0	0.152941182	216.0178	983.8506	655.3471	0.6698	3.8521	891	0.815396469	0.001883566	32.73165494	0.075610123
22.54886542	×ÔÉí³µÁ¾	Road 1	199.366923	66.20302963	-0.00024865	-1.117062926	0	0.160784319	216.2755	983.8545	655.3394	0.6706	3.8513	892	0.814912453	0.001882448	32.74521613	0.075641449
22.56558184	×ÔÉí³µÁ¾	Road 1	199.6740084	66.13301239	-0.00024865	-1.223643661	0	0.168627456	216.5512	983.8584	655.331	0.6717	3.8502	893	0.814367874	0.00188119	32.75882945	0.075672896
22.58219893	×ÔÉí³µÁ¾	Road 1	199.9787696	66.02480392	-0.00024865	-1.34846735	0	0.176470593	216.9368	983.8643	655.3191	0.6729	3.8491	894	0.813526253	0.001879246	32.77234789	0.075704124
22.59891023	×ÔÉí³µÁ¾	Road 1	200.2849121	65.95019302	-0.00024865	-1.33951056	0	0.176470593	217.1935	983.8682	655.3111	0.6736	3.8483	895	0.812945946	0.001877905	32.78593326	0.075735506
22.61557021	×ÔÉí³µÁ¾	Road 1	200.5897552	65.87255402	-0.00024865	-1.27934444	0	0.176470593	217.4682	983.8721	655.3025	0.6747	3.8473	896	0.812342087	0.00187651	32.79946686	0.075766768
22.63229213	×ÔÉí³µÁ¾	Road 1	200.8952401	65.76668701	-0.00024865	-1.297223806	0	0.184313729	217.8523	983.8779	655.2903	0.6758	3.8461	897	0.811518677	0.001874608	32.81303702	0.075798116
22.65029407	×ÔÉí³µÁ¾	Road 1	201.2237322	65.69134827	-0.00024865	-1.436596274	0	0.200000003	218.108	983.8818	655.2821	0.6766	3.8454	898	0.810932709	0.001873255	32.82763538	0.075831838
22.66617805	×ÔÉí³µÁ¾	Road 1	201.5130105	65.56304169	-0.00024865	-1.653076172	0	0.20784314	218.4909	983.8877	655.2698	0.6777	3.8443	899	0.809934769	0.001870949	32.84050037	0.075861556
22.68227279	×ÔÉí³µÁ¾	Road 1	201.8057233	65.47265854	-0.00024865	-1.665326118	0	0.223529413	218.7458	983.8906	655.2615	0.6794	3.8426	900	0.809231789	0.001869325	32.85352475	0.075891642
22.69889428	×ÔÉí³µÁ¾	Road 1	202.1075942	65.38134842	-0.00024865	-1.702147126	0	0.23137255	219.0003	983.8945	655.2531	0.6801	3.8419	901	0.808521599	0.001867685	32.86696358	0.075922686
22.71557882	×ÔÉí³µÁ¾	Road 1	202.4099452	65.23786011	-0.00024865	-1.830416799	0	0.239215687	219.3814	983.9004	655.2404	0.6811	3.8408	902	0.807405579	0.001865107	32.88043477	0.075953804
22.73218198	×ÔÉí³µÁ¾	Road 1	202.7103583	65.13742447	-0.00024865	-1.89272666	0	0.254901975	219.635	983.9043	655.2319	0.6818	3.8401	903	0.806624413	0.001863302	32.89382728	0.075984741
22.74889071	×ÔÉí³µÁ¾	Road 1	203.0119467	64.97911148	-0.00024865	-2.027002096	0	0.262745112	220.0147	983.9102	655.219	0.6829	3.8391	904	0.805393089	0.001860458	32.90728438	0.076015827
22.76554775	×ÔÉí³µÁ¾	Road 1	203.3123479	64.91602936	-0.00024865	-2.069415569	0	0.278431386	220.141	983.9121	655.2147	0.6832	3.8387	905	0.804965523	0.00185947	32.92069272	0.0760468
22.78266336	×ÔÉí³µÁ¾	Road 1	203.6202033	64.75255966	-0.00024865	-2.180181265	0	0.278431386	220.5194	983.918	655.2017	0.6842	3.8377	906	0.80363102	0.001856388	32.93444736	0.076078573
22.79883802	×ÔÉí³µÁ¾	Road 1	203.9106145	64.63695602	-0.00024865	-2.131300926	0	0.278431386	220.7711	983.9219	655.1929	0.6849	3.8371	907	0.80273188	0.001854311	32.94743127	0.076108566
22.81552035	×ÔÉí³µÁ¾	Road 1	204.2092608	64.44700241	-0.00024865	-2.040634632	0	0.278431386	221.2015	983.9277	655.1779	0.6869	3.8351	908	0.801254463	0.001850898	32.96079807	0.076139444
22.83220782	×ÔÉí³µÁ¾	Road 1	204.5074891	64.33700867	-0.00024865	-2.057151079	0	0.270588249	221.452	983.9316	655.169	0.6875	3.8344	909	0.800398956	0.001848922	32.9741547	0.076170297
22.84891765	×ÔÉí³µÁ¾	Road 1	204.8056091	64.22759857	-0.00024865	-2.009457111	0	0.262745112	221.7021	983.9355	655.16	0.6882	3.8338	910	0.799547989	0.001846956	32.98751501	0.07620116
22.8654662	×ÔÉí³µÁ¾	Road 1	205.1001004	64.06414948	-0.00024865	-1.905907989	0	0.262745112	222.0943	983.9414	655.1459	0.6894	3.8325	911	0.798276718	0.001844019	33.00072533	0.076231676
22.88222184	×ÔÉí³µÁ¾	Road 1	205.3978017	63.96199722	-0.00024865	-1.920043468	0	0.262745112	222.3434	983.9453	655.1369	0.69	3.8319	912	0.797482201	0.001842184	33.01408766	0.076262542
22.89886826	×ÔÉí³µÁ¾	Road 1	205.6930794	63.85757904	-0.00024865	-1.934202552	0	0.247058824	222.592	983.9482	655.1278	0.6916	3.8303	913	0.796670059	0.001840308	33.02734936	0.076293177
22.91546922	×ÔÉí³µÁ¾	Road 1	205.9868718	63.71032791	-0.00024865	-1.686471343	0	0.239215687	222.9642	983.9541	655.114	0.6925	3.8294	914	0.795524773	0.001837662	33.04055583	0.076323684
22.9322146	×ÔÉí³µÁ¾	Road 1	206.2828119	63.62256775	-0.00024865	-1.542645574	0	0.215686277	223.2119	983.958	655.1048	0.6931	3.8298	915	0.794842194	0.001836085	33.05386577	0.07635443
22.94881593	×ÔÉí³µÁ¾	Road 1	206.5758367	63.54246368	-0.00024865	-1.37564218	0	0.192156866	223.4593	983.9619	655.0955	0.6937	3.8292	916	0.794219162	0.001834646	33.06705086	0.076384887
22.99896191	×ÔÉí³µÁ¾	Road 1	207.4577285	63.31136627	-0.00024865	-1.177575111	0	0.168627456	224.3759	983.9756	655.0606	0.6966	3.8263	917	0.792421738	0.001830494	33.10678763	0.076476679
23.01548883	×ÔÉí³µÁ¾	Road 1	207.7480664	63.2432785	-0.00024865	-1.197712302	0	0.145098045	224.6221	983.9795	655.0511	0.6971	3.8257	918	0.791892166	0.001829271	33.11987517	0.076506912
23.03224118	×ÔÉí³µÁ¾	Road 1	208.0419652	63.15744781	-0.00024865	-0.515855789	0	0.098039217	225.0261	983.9854	655.0354	0.6986	3.8242	919	0.791224594	0.001827729	33.13313004	0.07653753
23.0492996	×ÔÉí³µÁ¾	Road 1	208.3411366	63.13696518	-0.00024865	-0.131498531	0	0.090196081	225.2718	983.9893	655.0258	0.6991	3.8236	920	0.791065285	0.001827361	33.14662436	0.076568702
23.06546436	×ÔÉí³µÁ¾	Road 1	208.6245616	63.12064362	-0.00024865	-0.238669768	0	0.074509807	225.5526	983.9932	655.0146	0.7003	3.8225	921	0.790938339	0.001827068	33.15940969	0.076598236
23.08220608	×ÔÉí³µÁ¾	Road 1	208.9179343	63.0844162	-0.000250828	-0.416944802	0	0.05882353	225.7981	983.9971	655.0048	0.7008	3.8219	922	0.79065657	0.001826417	33.17264664	0.076628814
23.09900902	×ÔÉí³µÁ¾	Road 1	209.2122706	63.06105652	-0.000253019	-0.179826319	0	0.050980393	226.1663	984.002	654.99	0.7026	3.8201	923	0.790474884	0.001825997	33.18592894	0.076659496
23.11550441	×ÔÉí³µÁ¾	Road 1	209.50118	63.05238419	-0.000255223	0.068365104	0	0.035294119	226.4117	984.0059	654.9801	0.7031	3.8195	924	0.790407433	0.001825841	33.19896702	0.076689614
23.13229378	×ÔÉí³µÁ¾	Road 1	209.795246	63.054039	-0.000258925	0.1777706	0	0.027450981	226.7973	984.0117	654.9643	0.7042	3.8184	925	0.844127864	0.001949935	33.2131394	0.076722352
23.149475	×ÔÉí³µÁ¾	Road 1	210.0961708	63.05309143	-0.000263414	0.076743171	0	0.019607844	227.0426	984.0156	654.9542	0.7047	3.8178	926	0.790412933	0.001825854	33.22671965	0.076753722
23.18250244	×ÔÉí³µÁ¾	Road 1	210.6746084	63.04985733	-0.000268335	0.125687674	0	0.011764706	227.3757	984.0205	654.9404	0.7059	3.8167	927	0.790387779	0.001825796	33.25282414	0.076814024
23.19879476	×ÔÉí³µÁ¾	Road 1	210.9600007	63.06113892	-0.000275249	0.251528114	0	0.011764706	227.9365	984.0293	654.917	0.7072	3.8153	928	1.167807114	0.002697634	33.27185043	0.076857974
23.21558084	×ÔÉí³µÁ¾	Road 1	211.2540606	63.06510773	-0.000291843	0.174612001	0	0.011764706	228.182	984.0322	654.9066	0.7087	3.8138	929	0.919360964	0.002123724	33.28728289	0.076893623
23.23221735	×ÔÉí³µÁ¾	Road 1	211.5455045	63.0659729	-0.000303681	0.137886941	0	0.011764706	228.4274	984.0361	654.8961	0.7092	3.8132	930	0.818856125	0.001891558	33.3009058	0.076925092
23.24884177	×ÔÉí³µÁ¾	Road 1	211.8367497	63.06882248	-0.000314563	0.2065209	0	0.011764706	228.8131	984.042	654.8796	0.7103	3.8121	931	0.883957914	0.002041943	33.31560109	0.076959039
23.26550395	×ÔÉí³µÁ¾	Road 1	212.1286784	63.07360153	-0.000327004	0.234385729	0	0.011764706	229.0585	984.0459	654.869	0.7109	3.8115	932	0.946906764	0.002187355	33.33137862	0.076995485
23.28216136	×ÔÉí³µÁ¾	Road 1	212.420554	63.08014526	-0.000342899	0.213669524	0	0.011764706	229.4268	984.0518	654.853	0.7117	3.8107	933	1.004765009	0.002321007	33.3481154	0.077034147
23.29886936	×ÔÉí³µÁ¾	Road 1	212.7133283	63.08283005	-0.000357453	0.179985359	0	0.011764706	229.6723	984.0547	654.8422	0.7132	3.8091	934	0.878243391	0.002028742	33.36278909	0.077068043
23.3155264	×ÔÉí³µÁ¾	Road 1	213.005222	63.08546677	-0.000372887	0.193795323	0	0.011764706	229.9178	984.0586	654.8314	0.7137	3.8086	935	0.876962423	0.002025783	33.37739669	0.077101786
23.33216585	×ÔÉí³µÁ¾	Road 1	213.2968364	63.09173584	-0.000389248	0.216993749	0	0.011764706	230.3037	984.0645	654.8142	0.7158	3.8074	936	0.996126686	0.002301053	33.39397169	0.077140075
23.34884049	×ÔÉí³µÁ¾	Road 1	213.5890883	63.09621277	-0.000402575	0.217538312	0	0.011764706	230.5492	984.0684	654.8032	0.7163	3.8069	937	0.93714278	0.0021648	33.40959821	0.077176172
23.36552686	×ÔÉí³µÁ¾	Road 1	213.8815657	63.10053177	-0.000414674	0.206375375	0	0.011764706	230.8124	984.0723	654.7914	0.7172	3.806	938	0.931922709	0.002152741	33.42514862	0.077212093
23.38213002	×ÔÉí³µÁ¾	Road 1	214.1726014	63.10417099	-0.000426494	0.205914959	0	0.011764706	231.058	984.0762	654.7803	0.7177	3.8054	939	0.910340032	0.002102885	33.44026314	0.077247008
23.39879953	×ÔÉí³µÁ¾	Road 1	214.4648197	63.10838699	-0.0004359	0.214844704	0	0.011764706	231.3212	984.0801	654.7684	0.7186	3.8046	940	0.928774612	0.002145469	33.45574535	0.077282772
23.41544154	×ÔÉí³µÁ¾	Road 1	214.7565872	63.11512299	-0.000441716	0.223625004	0	0.011764706	231.6896	984.0859	654.7515	0.7194	3.8037	941	1.011654666	0.002336922	33.47258133	0.077321663
23.43220746	×ÔÉí³µÁ¾	Road 1	215.0505495	63.12000504	-0.000448119	0.222353473	0	0.011764706	231.9353	984.0889	654.7401	0.7209	3.8022	942	0.949765465	0.002193958	33.48850501	0.077358447
23.44879999	×ÔÉí³µÁ¾	Road 1	215.3415014	63.12641144	-0.000452421	0.221122354	0	0.011764706	232.3038	984.0947	654.723	0.7217	3.8014	943	1.001605176	0.002313708	33.50512418	0.077396837
23.4654541	×ÔÉí³µÁ¾	Road 1	215.6335556	63.13126602	-0.000456209	0.22456646	0	0.011764706	232.5671	984.0986	654.7107	0.7225	3.8005	944	0.950048129	0.002194611	33.52094638	0.077433386
23.48223357	×ÔÉí³µÁ¾	Road 1	215.9278302	63.13597641	-0.000460563	0.229399562	0	0.011764706	232.8129	984.1025	654.6991	0.723	3.7999	945	0.944219961	0.002181148	33.5367899	0.077469985
23.49877918	×ÔÉí³µÁ¾	Road 1	216.2180281	63.14135284	-0.000465495	0.232539728	0	0.011764706	233.0762	984.1064	654.6868	0.7239	3.7991	946	0.968403984	0.002237013	33.55281273	0.077506997
23.51548315	×ÔÉí³µÁ¾	Road 1	216.5110319	63.14750519	-0.000470461	0.233685032	0	0.011764706	233.3747	984.1113	654.6725	0.7244	3.7985	947	0.992134794	0.002291831	33.56938532	0.07754528
23.53220801	×ÔÉí³µÁ¾	Road 1	216.804429	63.15327988	-0.000474906	0.234770879	0	0.011764706	233.6556	984.1152	654.6591	0.7256	3.7973	948	0.979624425	0.002262932	33.5857694	0.077583127
23.54885772	×ÔÉí³µÁ¾	Road 1	217.0965492	63.16222	-0.000481062	0.239022225	0	0.011764706	234.0771	984.1221	654.6387	0.7264	3.7965	949	1.08433516	0.002504814	33.60382327	0.077624832
23.56552063	×ÔÉí³µÁ¾	Road 1	217.3889264	63.16771317	-0.000487839	0.242135987	0	0.011764706	234.323	984.125	654.6268	0.728	3.795	950	0.971258238	0.002243607	33.62000725	0.077662217
23.58214212	×ÔÉí³µÁ¾	Road 1	217.6806018	63.17312393	-0.000497548	0.244950458	0	0.011764706	234.5689	984.1289	654.6147	0.7285	3.7944	951	0.969058071	0.002238524	33.63611444	0.077699424
23.59886954	×ÔÉí³µÁ¾	Road 1	217.9741776	63.18205719	-0.000508551	0.246833727	0	0.011764706	234.9554	984.1348	654.5958	0.7297	3.7932	952	1.08299545	0.002501719	33.65423017	0.077741272
23.61552659	×ÔÉí³µÁ¾	Road 1	218.2665451	63.18785248	-0.000519123	0.248789102	0	0.011764706	235.2013	984.1387	654.5836	0.7303	3.7927	953	0.981439281	0.002267125	33.67057804	0.077779035
23.63225621	×ÔÉí³µÁ¾	Road 1	218.5602275	63.19668274	-0.000532242	0.252611578	0	0.011764706	235.5703	984.1445	654.5653	0.7311	3.7918	954	1.07977647	0.002494284	33.6886423	0.077820764
23.65055616	×ÔÉí³µÁ¾	Road 1	218.881507	63.20270462	-0.000543748	0.256414562	0	0.011764706	235.8164	984.1484	654.553	0.7317	3.7913	955	0.971302334	0.002243708	33.70641708	0.077861823
23.66544274	×ÔÉí³µÁ¾	Road 1	219.1428862	63.20894623	-0.000555419	0.258408606	0	0.011764706	236.0624	984.1514	654.5405	0.7332	3.7897	956	1.020644239	0.002357688	33.72161098	0.077896921
23.68217492	×ÔÉí³µÁ¾	Road 1	219.4367143	63.21833954	-0.000566002	0.259731054	0	0.011764706	236.4316	984.1572	654.5219	0.7341	3.7889	957	1.098381244	0.002537261	33.7399893	0.077939375
23.69882024	×ÔÉí³µÁ¾	Road 1	219.7290467	63.22479401	-0.000572921	0.262245476	0	0.011764706	236.6777	984.1611	654.5093	0.7346	3.7883	958	1.003607291	0.002318333	33.75669466	0.077977965
23.71549305	×ÔÉí³µÁ¾	Road 1	220.0218924	63.23137894	-0.000577989	0.265767992	0	0.011764706	236.9239	984.165	654.4967	0.7352	3.7877	959	1.00760662	0.002327571	33.77349429	0.078016772
23.73215669	×ÔÉí³µÁ¾	Road 1	220.3146238	63.24147263	-0.000581809	0.268915951	0	0.011764706	237.2932	984.1709	654.4778	0.736	3.7869	960	1.122902753	0.002593905	33.79220594	0.078059996
23.74883866	×ÔÉí³µÁ¾	Road 1	220.6077098	63.24849014	-0.000584365	0.269746482	0	0.011764706	237.5394	984.1748	654.4653	0.7366	3.7863	961	1.021851892	0.002360478	33.80925244	0.078099373
23.76550523	×ÔÉí³µÁ¾	Road 1	220.9005602	63.25603638	-0.000585645	0.271610886	0	0.011764706	237.8033	984.1787	654.4518	0.7375	3.7854	962	1.039490141	0.002401222	33.82657719	0.078139393
23.78254533	×ÔÉí³µÁ¾	Road 1	221.2000085	63.26336975	-0.000586287	0.272748679	0	0.011764706	238.0496	984.1826	654.4392	0.7381	3.7849	963	1.027321369	0.002373112	33.84408284	0.078179831
23.79885121	×ÔÉí³µÁ¾	Road 1	221.4865952	63.27237167	-0.000588856	0.274145097	0	0.011764706	238.3487	984.1865	654.4239	0.7396	3.7833	964	1.093965661	0.002527061	33.86192092	0.078221037
23.81545254	×ÔÉí³µÁ¾	Road 1	221.7784174	63.28168259	-0.000589499	0.2747823	0	0.011764706	238.6479	984.1914	654.4086	0.7401	3.7828	965	1.09888716	0.002538429	33.8801639	0.078263179
23.83270707	×ÔÉí³µÁ¾	Road 1	222.0817636	63.29041672	-0.000589499	0.275111437	0	0.011764706	238.9295	984.1953	654.3942	0.7413	3.7816	966	1.069104343	0.002469631	33.8986108	0.078305791
23.84880549	×ÔÉí³µÁ¾	Road 1	222.3648294	63.30045547	-0.000591432	0.275272846	0	0.011764706	239.2463	984.2002	654.3781	0.7422	3.7807	967	1.133437339	0.00261824	33.91685734	0.07834794
23.86631221	×ÔÉí³µÁ¾	Road 1	222.6727159	63.31234131	-0.000594664	0.275013387	0	0.011764706	239.616	984.2061	654.3591	0.7431	3.7799	968	1.163866567	0.002688532	33.93723283	0.078395008
23.88235307	×ÔÉí³µÁ¾	Road 1	222.9548596	63.32060165	-0.000597257	0.275039256	0	0.011764706	239.8802	984.21	654.3456	0.744	3.779	969	1.074267095	0.002481557	33.954465	0.078434814
23.89885689	×ÔÉí³µÁ¾	Road 1	223.2451827	63.32853928	-0.000599207	0.275179356	0	0.011764706	240.1267	984.2139	654.3331	0.7445	3.7784	970	1.055758469	0.002438802	33.97188905	0.078475064
23.91550111	×ÔÉí³µÁ¾	Road 1	223.5380347	63.34137268	-0.000604428	0.275170326	0	0.011764706	240.5319	984.2207	654.3124	0.7451	3.7779	971	1.214677089	0.002805904	33.9921064	0.078521766
23.93230404	×ÔÉí³µÁ¾	Road 1	223.8337167	63.34936523	-0.00060705	0.274473488	0	0.011764706	240.7785	984.2246	654.2998	0.7456	3.7774	972	1.053109704	0.002432683	34.00980173	0.078562642
23.94879724	×ÔÉí³µÁ¾	Road 1	224.1239863	63.35768051	-0.000612316	0.274653196	0	0.011764706	241.0428	984.2285	654.2863	0.7465	3.7765	973	1.068811619	0.002468955	34.02742985	0.078603363
23.96543412	×ÔÉí³µÁ¾	Road 1	224.4168391	63.36944275	-0.000616286	0.275062978	0	0.011764706	241.4128	984.2344	654.2673	0.7484	3.7757	974	1.180015685	0.002725836	34.04706163	0.078648712
23.98227664	×ÔÉí³µÁ¾	Road 1	224.7133484	63.37728424	-0.000620272	0.274184197	0	0.011764706	241.6596	984.2373	654.2548	0.7499	3.7741	975	1.047917501	0.002420689	34.06471121	0.078689483
23.99884791	×ÔÉí³µÁ¾	Road 1	225.0051183	63.38510513	-0.000623608	0.274573952	0	0.011764706	241.9064	984.2412	654.2422	0.7505	3.7736	976	1.051503237	0.002428972	34.08213595	0.078729734
24.01551559	×ÔÉí³µÁ¾	Road 1	225.2986252	63.393647	-0.000624276	0.274514526	0	0.011764706	242.1708	984.2461	654.2287	0.7504	3.7737	977	1.073803735	0.002480487	34.10003376	0.078771078
24.03232732	×ÔÉí³µÁ¾	Road 1	225.5947101	63.4025116	-0.000624276	0.273875266	0	0.011764706	242.4529	984.25	654.2142	0.7516	3.7725	978	1.082022641	0.002499472	34.11822444	0.078813098
24.04877359	×ÔÉí³µÁ¾	Road 1	225.8844018	63.41193237	-0.000624276	0.274485081	0	0.011764706	242.7527	984.2549	654.199	0.7522	3.7719	979	1.107089163	0.002557376	34.13643193	0.078855158
24.06546216	×ÔÉí³µÁ¾	Road 1	226.1784054	63.42142868	-0.000624276	0.274035394	0	0.011764706	243.0525	984.2598	654.1836	0.7528	3.7714	980	1.105132416	0.002552856	34.15487501	0.078897761
24.08268627	×ÔÉí³µÁ¾	Road 1	226.4819076	63.43481827	-0.000624276	0.274415433	0	0.011764706	243.4759	984.2656	654.162	0.7546	3.7696	981	1.21949549	0.002817035	34.17587973	0.078946282
24.09880374	×ÔÉí³µÁ¾	Road 1	226.7659452	63.44263916	-0.000624276	0.2743963	0	0.011764706	243.7229	984.2695	654.1494	0.7552	3.769	982	1.059470427	0.002447377	34.19295571	0.078985728
24.11541424	×ÔÉí³µÁ¾	Road 1	227.0587096	63.4509819	-0.000624276	0.273507237	0	0.011764706	243.9875	984.2744	654.1359	0.7551	3.7691	983	1.068898282	0.002469155	34.21071064	0.079026742
24.13255403	×ÔÉí³µÁ¾	Road 1	227.3608405	63.4588028	-0.000625615	0.274346679	0	0.011764706	244.2346	984.2773	654.1233	0.7566	3.7676	984	1.043792324	0.00241116	34.22860103	0.079068068
24.14883939	×ÔÉí³µÁ¾	Road 1	227.64795	63.46771545	-0.000625615	0.27390182	0	0.011764706	244.517	984.2822	654.1088	0.7568	3.7674	985	1.093792657	0.002526661	34.24641383	0.079109216
24.16545941	×ÔÉí³µÁ¾	Road 1	227.9410214	63.48107071	-0.000625615	0.274272084	0	0.011764706	244.9407	984.2891	654.0872	0.7577	3.7665	986	1.234532096	0.002851769	34.26693179	0.079156612
24.21545547	×ÔÉí³µÁ¾	Road 1	228.8229902	63.50675812	-0.000625615	0.273963004	0	0.011764706	245.647	984.2998	654.0511	0.7597	3.7645	987	1.075863887	0.002485246	34.32072074	0.079280865
24.23209309	×ÔÉí³µÁ¾	Road 1	229.1165315	63.51562958	-0.000625615	0.273473948	0	0.011764706	246.0355	984.3057	654.0313	0.7609	3.7633	988	1.086673081	0.002510215	34.33880039	0.079322629
24.24882748	×ÔÉí³µÁ¾	Road 1	229.4118315	63.52668457	-0.000625615	0.274142981	0	0.011764706	246.2829	984.3096	654.0186	0.7615	3.7627	989	1.156740062	0.00267207	34.35815773	0.079367344
24.28219142	×ÔÉí³µÁ¾	Road 1	230.0006957	63.53898239	-0.000625615	0.27300477	0	0.011764706	246.7776	984.3174	653.9933	0.7626	3.7616	990	0.996569514	0.002302076	34.39140721	0.079444151
24.29875426	×ÔÉí³µÁ¾	Road 1	230.2930869	63.55240631	-0.000625615	0.274059534	0	0.011764706	247.1664	984.3232	653.9735	0.7638	3.7604	991	1.239382252	0.002862973	34.4119349	0.07949157
24.31544759	×ÔÉí³µÁ¾	Road 1	230.5878302	63.56286392	-0.000625615	0.272481024	0	0.011764706	247.5375	984.3291	653.9545	0.7647	3.7596	992	1.138466335	0.002629857	34.4309397	0.079535471
24.33212773	×ÔÉí³µÁ¾	Road 1	230.8823766	63.57062988	-0.000626285	0.273754835	0	0.011764706	247.785	984.333	653.9418	0.7652	3.7591	993	1.050201733	0.002425966	34.44845721	0.079575936
24.34883206	×ÔÉí³µÁ¾	Road 1	231.1773889	63.57897949	-0.000626285	0.273275524	0	0.011764706	248.0502	984.3379	653.9283	0.7652	3.7593	994	1.069125059	0.002469679	34.46631623	0.07961719
24.36544732	×ÔÉí³µÁ¾	Road 1	231.4708714	63.58837967	-0.000626285	0.273700595	0	0.011764706	248.3509	984.3428	653.913	0.7657	3.7588	995	1.105452606	0.002553596	34.48468361	0.079659619
24.38218684	×ÔÉí³µÁ¾	Road 1	231.766608	63.60108261	-0.000626285	0.273915321	0	0.011764706	248.7576	984.3486	653.8922	0.7682	3.7574	996	1.211732145	0.002799101	34.50496742	0.079706475
24.39883912	×ÔÉí³µÁ¾	Road 1	232.0608394	63.6089035	-0.000626285	0.272787005	0	0.011764706	249.0053	984.3525	653.8795	0.7688	3.7567	997	1.052894667	0.002432187	34.52250052	0.079746976
24.41545584	×ÔÉí³µÁ¾	Road 1	232.3544782	63.6166008	-0.000626285	0.273845971	0	0.011764706	249.253	984.3564	653.8668	0.7694	3.7561	998	1.049449496	0.002424228	34.53993893	0.079787259
24.43214001	×ÔÉí³µÁ¾	Road 1	232.6493656	63.62886429	-0.000626285	0.272722781	0	0.011764706	249.6422	984.3623	653.847	0.7705	3.7547	999	1.199033903	0.002769768	34.55994382	0.07983347
24.44883188	×ÔÉí³µÁ¾	Road 1	232.9444251	63.63663025	-0.000626285	0.273551911	0	0.011764706	249.89	984.3662	653.8344	0.7711	3.754	1000	1.050800706	0.00242735	34.57748364	0.079873987
24.46549185	×ÔÉí³µÁ¾	Road 1	233.2389567	63.64437561	-0.000626285	0.272628486	0	0.011764706	250.1378	984.3701	653.8217	0.7717	3.7534	1001	1.050701908	0.002427121	34.59498831	0.079914423
24.4821489	×ÔÉí³µÁ¾	Road 1	233.5334749	63.65267715	-0.000626285	0.273092896	0	0.011764706	250.4033	984.375	653.8081	0.7716	3.7533	1002	1.069210004	0.002469875	34.61279819	0.079955564
24.49883124	×ÔÉí³µÁ¾	Road 1	233.8284964	63.66477585	-0.000626285	0.272808492	0	0.011764706	250.7928	984.3809	653.7882	0.7728	3.7521	1003	1.194151802	0.002758491	34.63271943	0.080001582
24.51551284	×ÔÉí³µÁ¾	Road 1	234.1235408	63.67252808	-0.000626285	0.273268133	0	0.011764706	251.0407	984.3848	653.7755	0.7734	3.7515	1004	1.050928813	0.002427646	34.65025061	0.080042079
24.53209914	×ÔÉí³µÁ¾	Road 1	234.4169531	63.68415298	-0.000626285	0.273141325	0	0.011764706	251.4126	984.3906	653.7565	0.7743	3.7506	1005	1.181016895	0.002728149	34.66983931	0.080087329
24.54876095	×ÔÉí³µÁ¾	Road 1	234.71174	63.69253006	-0.000626285	0.27296418	0	0.011764706	251.6782	984.3955	653.743	0.7743	3.7507	1006	1.072108035	0.00247657	34.68770257	0.080128593
24.56545538	×ÔÉí³µÁ¾	Road 1	235.00714	63.70026855	-0.000626285	0.272894412	0	0.011764706	251.9262	984.3994	653.7303	0.775	3.7502	1007	1.050606609	0.002426901	34.70524185	0.080169109
24.58217291	×ÔÉí³µÁ¾	Road 1	235.3029845	63.70799332	-0.000626285	0.272830009	0	0.011764706	252.1743	984.4033	653.7177	0.7757	3.7496	1008	1.049892907	0.002425253	34.72279347	0.080209653
24.59875188	×ÔÉí³µÁ¾	Road 1	235.596438	63.72125931	-0.000626285	0.272435427	0	0.011764706	252.5995	984.4102	653.696	0.7766	3.7487	1009	1.236199526	0.002855621	34.74328838	0.080256996
24.61543128	×ÔÉí³µÁ¾	Road 1	235.8917047	63.72890167	-0.000626285	0.273059964	0	0.011764706	252.8476	984.4141	653.6832	0.7772	3.7482	1010	1.048000242	0.002420881	34.7607684	0.080297375
24.63225987	×ÔÉí³µÁ¾	Road 1	236.1896487	63.73666077	-0.000626285	0.272610933	0	0.011764706	253.0958	984.418	653.6706	0.7778	3.7476	1011	1.049674262	0.002424748	34.77843294	0.08033818
24.64876077	×ÔÉí³µÁ¾	Road 1	236.4818291	63.74500351	-0.000626285	0.272316277	0	0.011764706	253.3617	984.4219	653.657	0.7786	3.7467	1012	1.07429896	0.002481631	34.79615983	0.080379129
24.6654519	×ÔÉí³µÁ¾	Road 1	236.7774216	63.75438995	-0.000626285	0.272731304	0	0.011764706	253.6631	984.4268	653.6416	0.7792	3.7461	1013	1.105685295	0.002554133	34.81461497	0.080421761
24.68227353	×ÔÉí³µÁ¾	Road 1	237.0753663	63.76321335	-0.000626285	0.272701681	0	0.011764706	253.9468	984.4316	653.6271	0.7794	3.7459	1014	1.084951412	0.002506238	34.83286562	0.08046392
24.69880374	×ÔÉí³µÁ¾	Road 1	237.36821	63.77636948	-0.000626285	0.272686124	0	0.011764706	254.3724	984.4385	653.6054	0.7802	3.745	1015	1.234647464	0.002852036	34.85327461	0.080511064
24.71556856	×ÔÉí³µÁ¾	Road 1	237.6652457	63.7841011	-0.000626285	0.272876233	0	0.011764706	254.6207	984.4424	653.5927	0.7808	3.7444	1016	1.05029615	0.002426184	34.87088263	0.080551739
24.73254011	×ÔÉí³µÁ¾	Road 1	237.9659808	63.7918396	-0.000626285	0.27241236	0	0.011764706	254.8691	984.4463	653.58	0.7814	3.7439	1017	1.047513332	0.002419756	34.88866055	0.080592806
24.74875692	×ÔÉí³µÁ¾	Road 1	238.2533968	63.80402756	-0.000626285	0.272967011	0	0.011764706	255.2594	984.4521	653.5601	0.7827	3.7427	1018	1.210620516	0.002796533	34.90829296	0.080638157
24.76550047	×ÔÉí³µÁ¾	Road 1	238.5501844	63.81175232	-0.000626285	0.272113711	0	0.011764706	255.5079	984.4561	653.5474	0.7842	3.7421	1019	1.050718206	0.002427159	34.92588571	0.080678796
24.78256879	×ÔÉí³µÁ¾	Road 1	238.8527652	63.81944962	-0.000626285	0.27211836	0	0.011764706	255.7563	984.46	653.5347	0.7849	3.7415	1020	1.045080085	0.002414135	34.94372347	0.080720001
24.79881932	×ÔÉí³µÁ¾	Road 1	239.1409033	63.83157578	-0.000626285	0.272044241	0	0.011764706	256.1469	984.4668	653.5148	0.7851	3.7413	1021	1.208056077	0.00279061	34.96335503	0.08076535
24.81546867	×ÔÉí³µÁ¾	Road 1	239.436148	63.83919754	-0.000626285	0.272288322	0	0.011764706	256.3954	984.4707	653.502	0.7857	3.7407	1022	1.049068661	0.002423349	34.98082134	0.080805697
24.8323867	×ÔÉí³µÁ¾	Road 1	239.7361936	63.8469017	-0.000626285	0.272238553	0	0.011764706	256.644	984.4746	653.4893	0.7863	3.7401	1023	1.047834791	0.002420498	34.99854864	0.080846647
24.8487615	×ÔÉí³µÁ¾	Road 1	240.0266427	63.85525131	-0.000626285	0.272408634	0	0.011764706	256.9103	984.4795	653.4757	0.7863	3.7402	1024	1.078017877	0.002490221	35.01620096	0.080887424
24.86542331	×ÔÉí³µÁ¾	Road 1	240.3222259	63.86459656	-0.000626285	0.271945238	0	0.011764706	257.2122	984.4844	653.4603	0.7869	3.7396	1025	1.106259776	0.00255546	35.03463325	0.080930003
24.8824667	×ÔÉí³µÁ¾	Road 1	240.6246202	63.87339249	-0.000626285	0.272808909	0	0.011764706	257.4964	984.4883	653.4458	0.7881	3.7384	1026	1.081651243	0.002498614	35.05306826	0.080972588
24.89876562	×ÔÉí³µÁ¾	Road 1	240.9138649	63.88650055	-0.000626285	0.272109836	0	0.011764706	257.9228	984.4951	653.424	0.789	3.7375	1027	1.24086873	0.002866407	35.07329308	0.081019307
24.91543366	×ÔÉí³µÁ¾	Road 1	241.2096958	63.89420471	-0.000626285	0.272979051	0	0.011764706	258.1715	984.499	653.4113	0.7897	3.7369	1028	1.052159926	0.002430489	35.09083053	0.081059819
24.93234693	×ÔÉí³µÁ¾	Road 1	241.5099153	63.90191574	-0.000626285	0.272489756	0	0.011764706	258.4203	984.5039	653.3986	0.7893	3.7373	1029	1.0487742	0.002422668	35.10856872	0.081100794
24.94874115	×ÔÉí³µÁ¾	Road 1	241.8009766	63.91400757	-0.000626285	0.272470176	0	0.011764706	258.8113	984.5098	653.3786	0.7905	3.7361	1030	1.20446021	0.002782303	35.12831492	0.081146407
24.96548397	×ÔÉí³µÁ¾	Road 1	242.0982629	63.9217804	-0.000626285	0.271791488	0	0.011764706	259.0602	984.5137	653.3659	0.7912	3.7355	1031	1.053609489	0.002433838	35.14595531	0.081187157
24.98232796	×ÔÉí³µÁ¾	Road 1	242.3973815	63.92945709	-0.000626285	0.272136807	0	0.011764706	259.3091	984.5176	653.3532	0.7918	3.7349	1032	1.049006902	0.002423206	35.16362477	0.081227973
24.99881419	×ÔÉí³µÁ¾	Road 1	242.6902023	63.94154205	-0.000626285	0.271292597	0	0.011764706	259.7003	984.5244	653.3333	0.792	3.7347	1033	1.202345462	0.002777418	35.18344691	0.081273762
25.01543348	×ÔÉí³µÁ¾	Road 1	242.9854219	63.94919815	-0.000626285	0.271677881	0	0.011764706	259.9492	984.5283	653.3206	0.7927	3.7341	1034	1.05195846	0.002430024	35.20092971	0.081314148
25.03254139	×ÔÉí³µÁ¾	Road 1	243.289358	63.95697098	-0.000626285	0.271857619	0	0.011764706	260.1982	984.5322	653.3077	0.7933	3.7335	1035	1.048548827	0.002422148	35.21886819	0.081355586
25.04881208	×ÔÉí³µÁ¾	Road 1	243.5784571	63.96512146	-0.000626285	0.271222979	0	0.011764706	260.4651	984.5371	653.2941	0.7932	3.7336	1036	1.074395559	0.002481854	35.23634935	0.081395967
25.06548342	×ÔÉí³µÁ¾	Road 1	243.8747178	63.97436371	-0.000626285	0.272272319	0	0.011764706	260.7675	984.542	653.2787	0.7939	3.7326	1037	1.104053171	0.002550363	35.2547554	0.081438485
25.08262139	×ÔÉí³µÁ¾	Road 1	244.1793233	63.98541183	-0.000626285	0.271573335	0	0.011764706	261.0522	984.5459	653.2642	0.7951	3.731	1038	1.154103825	0.00266598	35.27453439	0.081484174
25.09882244	×ÔÉí³µÁ¾	Road 1	244.4673182	63.99471588	-0.000626285	0.271978915	0	0.011764706	261.4259	984.5527	653.2451	0.7951	3.7309	1039	1.115317535	0.002576384	35.2926037	0.081525915
25.1154289	×ÔÉí³µÁ¾	Road 1	244.7625552	64.00239944	-0.000626285	0.271909177	0	0.011764706	261.675	984.5566	653.2324	0.7957	3.7313	1040	1.053695575	0.002434037	35.31010186	0.081566335
25.13213066	×ÔÉí³µÁ¾	Road 1	245.0595424	64.01442947	-0.000626285	0.272368938	0	0.011764706	262.0667	984.5625	653.2124	0.7969	3.7301	1041	1.1963222	0.002763504	35.33008255	0.081612491
25.14887788	×ÔÉí³µÁ¾	Road 1	245.357376	64.02264862	-0.000626285	0.27144447	0	0.011764706	262.3337	984.5674	653.1987	0.7969	3.7302	1042	1.069474578	0.002470486	35.34799327	0.081653864
25.16540003	×ÔÉí³µÁ¾	Road 1	245.6512419	64.03022232	-0.000626285	0.271694094	0	0.011764706	262.583	984.5713	653.186	0.7985	3.7296	1043	1.051650554	0.002429313	35.3653688	0.081694002
25.18223632	×ÔÉí³µÁ¾	Road 1	245.9507489	64.04173737	-0.000626285	0.272079736	0	0.011764706	262.957	984.5771	653.1669	0.7994	3.7287	1044	1.176594062	0.002717932	35.38517828	0.081739762
25.1987834	×ÔÉí³µÁ¾	Road 1	246.2451466	64.04946899	-0.000626285	0.271355629	0	0.011764706	263.2064	984.582	653.1542	0.7991	3.729	1045	1.056776523	0.002441154	35.40266485	0.081780156
25.21544558	×ÔÉí³µÁ¾	Road 1	246.5416551	64.06310577	-0.000626285	0.355226755	0	0	263.5804	984.5879	653.1351	0.8	3.7281	1046	1.251327729	0.002890567	35.42351469	0.081828319
25.23223458	×ÔÉí³µÁ¾	Road 1	246.8404867	64.07727127	-0.000626285	0.42980504	0	0	263.8299	984.5918	653.1223	0.8007	3.7275	1047	1.265549783	0.00292342	35.44476201	0.0818774
25.24879522	×ÔÉí³µÁ¾	Road 1	247.1353253	64.09286499	-0.000626285	0.413678259	0	0	264.0794	984.5957	653.1096	0.8013	3.7269	1048	1.319985834	0.003049167	35.46662182	0.081927896
25.26539178	×ÔÉí³µÁ¾	Road 1	247.4308632	64.10584946	-0.000626285	0.348645031	0	0	264.329	984.6006	653.0969	0.8009	3.7273	1049	1.231984832	0.002845885	35.48706853	0.081975128
25.2822464	×ÔÉí³µÁ¾	Road 1	247.7310532	64.11796875	-0.000623608	0.322562426	0	0	264.6143	984.6045	653.0823	0.8021	3.7261	1050	1.197086846	0.002765271	35.50724498	0.082021736
25.29879751	×ÔÉí³µÁ¾	Road 1	248.0259318	64.13847885	-0.000620272	0.391501725	0	0	265.0423	984.6123	653.0604	0.802	3.7261	1051	1.485611555	0.003431763	35.5318335	0.082078535
25.31545676	×ÔÉí³µÁ¾	Road 1	248.3228019	64.15251389	-0.000616286	0.396525472	0	0	265.292	984.6162	653.0476	0.8026	3.7255	1052	1.26598604	0.002924428	35.55292387	0.082127254
25.3323319	×ÔÉí³µÁ¾	Road 1	248.623581	64.16564941	-0.000612316	0.366844684	0	0	265.5418	984.6201	653.0349	0.8033	3.7249	1053	1.230655978	0.002842815	35.57369136	0.082175227
25.3487089	×ÔÉí³µÁ¾	Road 1	248.9155642	64.18390045	-0.00060705	0.346978545	0	0	265.9345	984.627	653.0148	0.8036	3.7247	1054	1.417268205	0.00327389	35.59690196	0.082228844
25.36540773	×ÔÉí³µÁ¾	Road 1	249.2133409	64.19587555	-0.000601814	0.367430687	0	0	266.1844	984.6309	653.0021	0.8042	3.7241	1055	1.197108426	0.00276532	35.61689227	0.082275021
25.38213992	×ÔÉí³µÁ¾	Road 1	249.5117991	64.21453171	-0.000596608	0.382557124	0	0	266.5415	984.6367	652.9838	0.8048	3.7235	1056	1.41810733	0.003275828	35.64062031	0.082329833
25.39876581	×ÔÉí³µÁ¾	Road 1	249.8084213	64.22754364	-0.000589499	0.368963361	0	0	266.7915	984.6406	652.9711	0.8055	3.7229	1057	1.233905042	0.002850321	35.66113508	0.082377222
25.41539572	×ÔÉí³µÁ¾	Road 1	250.1051754	64.24052811	-0.000584365	0.356718034	0	0	267.0595	984.6455	652.9574	0.8055	3.7229	1058	1.233071796	0.002848396	35.68164096	0.082424591
25.43263816	×ÔÉí³µÁ¾	Road 1	250.412917	64.2525032	-0.000576719	0.359532833	0	0	267.3096	984.6494	652.9446	0.8061	3.7223	1059	1.185347061	0.002738152	35.70207923	0.082471803
25.44879412	×ÔÉí³µÁ¾	Road 1	250.7013603	64.27322617	-0.00056914	0.373567075	0	0	267.7207	984.6563	652.9236	0.8067	3.7217	1060	1.512250674	0.003493299	35.7265111	0.082528241
25.46538005	×ÔÉí³µÁ¾	Road 1	250.9975383	64.28585358	-0.000561006	0.371660024	0	0	267.9709	984.6602	652.9108	0.8074	3.7211	1061	1.222923003	0.002824952	35.74679442	0.082575095
25.48220058	×ÔÉí³µÁ¾	Road 1	251.2979884	64.3035965	-0.000552949	0.364498645	0	0	268.2213	984.665	652.898	0.807	3.7214	1062	1.386241912	0.003202219	35.77011174	0.082628958
25.49872054	×ÔÉí³µÁ¾	Road 1	251.5931297	64.31668396	-0.00054558	0.363481164	0	0	268.5968	984.6709	652.8788	0.808	3.7205	1063	1.240531219	0.002865627	35.79060525	0.082676298
25.51541534	×ÔÉí³µÁ¾	Road 1	251.8914522	64.32906418	-0.000535858	0.368055999	0	0	268.8473	984.6748	652.8661	0.8086	3.7199	1064	1.21255384	0.002800999	35.8108486	0.08272306
25.53218711	×ÔÉí³µÁ¾	Road 1	252.1912381	64.34794006	-0.000528044	0.369883329	0.011764706	0	269.223	984.6816	652.8469	0.8086	3.7199	1065	1.426250349	0.003294638	35.83476935	0.082778317
25.5488009	×ÔÉí³µÁ¾	Road 1	252.4882583	64.36056061	-0.000523868	0.367536336	0.011764706	0	269.4736	984.6855	652.8341	0.8093	3.7193	1066	1.223055767	0.002825259	35.85508894	0.082825255
25.56554702	×ÔÉí³µÁ¾	Road 1	252.7877057	64.37377167	-0.000519123	0.367765486	0.019607844	0	269.7421	984.6904	652.8204	0.8102	3.7193	1067	1.239519551	0.00286329	35.87584608	0.082873204
25.58216484	×ÔÉí³µÁ¾	Road 1	253.0849466	64.39274368	-0.000515583	0.370362967	0.019607844	0	270.1181	984.6963	652.8011	0.8112	3.7184	1068	1.436054122	0.003317285	35.89971018	0.082928331
25.59873538	×ÔÉí³µÁ¾	Road 1	253.3814003	64.40547409	-0.000514406	0.373620033	0.019607844	0	270.3688	984.7002	652.7883	0.8119	3.7178	1069	1.228492974	0.002837819	35.92006697	0.082975355
25.61546097	×ÔÉí³µÁ¾	Road 1	253.6806871	64.4182045	-0.000514406	0.374219418	0.027450981	0	270.6196	984.7051	652.7755	0.8115	3.7181	1070	1.22471205	0.002829085	35.940551	0.083022673
25.63224301	×ÔÉí³µÁ¾	Road 1	253.9810692	64.43738251	-0.000514406	0.373610377	0.027450981	0	270.8705	984.709	652.7628	0.8122	3.7175	1071	1.437447804	0.003320504	35.9646743	0.083078398
25.64878936	×ÔÉí³µÁ¾	Road 1	254.2772958	64.45022964	-0.000514406	0.375688344	0.027450981	0	271.2468	984.7148	652.7435	0.8132	3.7166	1072	1.233692332	0.002849829	35.9850874	0.083125552
25.66544494	×ÔÉí³µÁ¾	Road 1	254.5755379	64.46317291	-0.000514406	0.377835989	0.027450981	0	271.4978	984.7197	652.7307	0.8128	3.7169	1073	1.234258037	0.002851136	36.00564468	0.083173039
25.68249126	×ÔÉí³µÁ¾	Road 1	254.8808429	64.47711868	-0.000513819	0.378145784	0.027450981	0	271.7667	984.7236	652.717	0.8138	3.7159	1074	1.257298187	0.002904359	36.027077	0.083222548
25.69876965	×ÔÉí³µÁ¾	Road 1	255.1724951	64.49948959	-0.000513819	0.379008144	0.027450981	0	272.1971	984.7314	652.695	0.8138	3.7159	1075	1.567552234	0.003621046	36.05259423	0.083281493
25.71546739	×ÔÉí³µÁ¾	Road 1	255.4717214	64.51263199	-0.000513819	0.378808975	0.027450981	0	272.4483	984.7354	652.6822	0.8145	3.7152	1076	1.240528489	0.002865621	36.07330824	0.083329342
25.73257969	×ÔÉí³µÁ¾	Road 1	255.7784391	64.52571259	-0.000513819	0.38005662	0.027450981	0	272.6995	984.7393	652.6693	0.8151	3.7146	1077	1.228073872	0.002836851	36.09432342	0.083377887
25.7487166	×ÔÉí³µÁ¾	Road 1	256.0677666	64.54640121	-0.000513819	0.381245494	0.027450981	0	273.0943	984.7461	652.6492	0.8155	3.7142	1078	1.517062099	0.003504413	36.1188041	0.083434437
25.76539417	×ÔÉí³µÁ¾	Road 1	256.3668491	64.55958481	-0.000513819	0.38123557	0.027450981	0	273.3456	984.75	652.6363	0.8161	3.7136	1079	1.243121788	0.002871611	36.13953635	0.083482329
25.78235472	×ÔÉí³µÁ¾	Road 1	256.6710994	64.579319	-0.000513819	0.382324427	0.027450981	0	273.7227	984.7568	652.6171	0.8162	3.7136	1080	1.451544804	0.003353068	36.16415536	0.083539199
25.79884718	×ÔÉí³µÁ¾	Road 1	256.9670176	64.5934845	-0.000513819	0.382294714	0.027450981	0	273.9922	984.7617	652.6033	0.8162	3.7136	1081	1.281796451	0.00296095	36.18529534	0.083588032
25.81538803	×ÔÉí³µÁ¾	Road 1	257.2638652	64.60681229	-0.000513819	0.383303672	0.027450981	0	274.2437	984.7656	652.5905	0.8168	3.7129	1082	1.25232589	0.002892873	36.20600987	0.083635883
25.83230423	×ÔÉí³µÁ¾	Road 1	257.567511	64.62001648	-0.000513819	0.383493453	0.019607844	0	274.4953	984.7695	652.5776	0.8175	3.7122	1083	1.23845788	0.002860838	36.22695987	0.083684277
25.84922153	×ÔÉí³µÁ¾	Road 1	257.8712749	64.64092484	-0.000513819	0.383194	0.019607844	0	274.8907	984.7764	652.5574	0.8178	3.7119	1084	1.493064831	0.00344898	36.25221849	0.083742625
25.86535586	×ÔÉí³µÁ¾	Road 1	258.1610395	64.65419083	-0.000513819	0.383154571	0.019607844	0	275.1424	984.7803	652.5446	0.8185	3.7112	1085	1.262226554	0.002915743	36.27258368	0.083789668
25.88227939	×ÔÉí³µÁ¾	Road 1	258.4650394	64.66735382	-0.000513819	0.382515401	0.019607844	0	275.3941	984.7852	652.5317	0.8182	3.7115	1086	1.237596232	0.002858847	36.29352818	0.08383805
25.89908929	×ÔÉí³µÁ¾	Road 1	258.7670914	64.68731461	-0.000513819	0.383045048	0.019607844	0	275.7719	984.791	652.5125	0.8192	3.7105	1087	1.466832482	0.003388383	36.31818548	0.083895008
25.9154135	×ÔÉí³µÁ¾	Road 1	259.0604761	64.7004982	-0.000513819	0.383244842	0.019607844	0	276.0237	984.7959	652.4996	0.8189	3.7108	1088	1.254747138	0.002898466	36.33866824	0.083942324
25.93230258	×ÔÉí³µÁ¾	Road 1	259.3640751	64.71381226	-0.000513819	0.382525295	0.019607844	0	276.2757	984.7998	652.4867	0.8196	3.7102	1089	1.244158356	0.002874006	36.35968092	0.083990863
25.94869607	×ÔÉí³µÁ¾	Road 1	259.658834	64.72886353	-0.000513819	0.38315478	0.019607844	0	276.5637	984.8047	652.472	0.8199	3.7098	1090	1.316972438	0.003042206	36.3812707	0.084040735
25.96544035	×ÔÉí³µÁ¾	Road 1	259.9599711	64.74409332	-0.000513819	0.382868767	0.019607844	0	276.8517	984.8096	652.4573	0.8203	3.7095	1091	1.312414974	0.003031679	36.40324615	0.084091499
25.98232063	×ÔÉí³µÁ¾	Road 1	260.2636334	64.7610466	-0.000513819	0.383048743	0.019607844	0	277.1578	984.8145	652.4417	0.8209	3.7088	1092	1.365707139	0.003154783	36.42629966	0.084144752
25.99872182	×ÔÉí³µÁ¾	Road 1	260.5587635	64.77996368	-0.000512059	0.382985234	0.019607844	0	277.5361	984.8213	652.4224	0.821	3.7087	1093	1.449452566	0.003348235	36.45007241	0.084199667
26.01538583	×ÔÉí³µÁ¾	Road 1	260.8586842	64.79320221	-0.000511473	0.382509649	0.019607844	0	277.7884	984.8252	652.4095	0.8217	3.7081	1094	1.248740404	0.00288459	36.47088143	0.084247736
26.03258611	×ÔÉí³µÁ¾	Road 1	261.1683562	64.8140213	-0.000511473	0.382886171	0.019607844	0	278.1848	984.832	652.3892	0.822	3.7077	1095	1.481966665	0.003423343	36.49637167	0.084306619
26.04878642	×ÔÉí³µÁ¾	Road 1	261.4600849	64.82732162	-0.000509134	0.382207036	0.019607844	0	278.4372	984.8359	652.3763	0.8227	3.707	1096	1.264114477	0.002920104	36.51685072	0.084353925
26.06537346	×ÔÉí³µÁ¾	Road 1	261.7588687	64.84714508	-0.000506803	0.382989317	0.019607844	0	278.8159	984.8428	652.3569	0.8227	3.707	1097	1.474017144	0.00340498	36.54130029	0.084410404
26.08205799	×ÔÉí³µÁ¾	Road 1	262.0594698	64.86030807	-0.000503898	0.382736117	0.019607844	0	279.0684	984.8467	652.3441	0.8234	3.7063	1098	1.246638288	0.002879734	36.56209988	0.084458451
26.09871247	×ÔÉí³µÁ¾	Road 1	262.359591	64.8736084	-0.000499851	0.382060617	0.019607844	0	279.3209	984.8516	652.3312	0.8231	3.7066	1099	1.252252533	0.002892703	36.58295549	0.084506627
26.11538858	×ÔÉí³µÁ¾	Road 1	262.6601934	64.89337692	-0.000495252	0.383096069	0.019607844	0	279.6999	984.8574	652.3118	0.8241	3.7056	1100	1.469428066	0.003394379	36.60745983	0.084563232
26.13206468	×ÔÉí³µÁ¾	Road 1	262.9608571	64.90659485	-0.000492963	0.382586718	0.019607844	0	279.9525	984.8623	652.299	0.8239	3.7059	1101	1.249384898	0.002886079	36.6282947	0.084611361
26.14875802	×ÔÉí³µÁ¾	Road 1	263.2618927	64.91981964	-0.000490112	0.382546842	0.019607844	0	280.2053	984.8662	652.286	0.8245	3.7052	1102	1.249350177	0.002885999	36.64915052	0.084659538
26.16539637	×ÔÉí³µÁ¾	Road 1	263.5620284	64.9396431	-0.000485573	0.382479072	0.019607844	0	280.5845	984.873	652.2667	0.8256	3.7051	1103	1.473623552	0.00340407	36.67366919	0.084716176
26.18213552	×ÔÉí³µÁ¾	Road 1	263.8640439	64.95284729	-0.000479378	0.382007748	0.019607844	0	280.8373	984.877	652.2538	0.8263	3.7044	1104	1.247925441	0.002882708	36.6945584	0.08476443
26.19871046	×ÔÉí³µÁ¾	Road 1	264.1631573	64.96606522	-0.000474906	0.38239789	0.019607844	0	281.0902	984.8818	652.2408	0.826	3.7047	1105	1.252970759	0.002894362	36.71532631	0.084812404
26.21555591	×ÔÉí³µÁ¾	Road 1	264.4672504	64.98697357	-0.000467698	0.38185218	0.019607844	0	281.4878	984.8877	652.2206	0.8273	3.7034	1106	1.502412249	0.003470572	36.74063513	0.084870867
26.23203481	×ÔÉí³µÁ¾	Road 1	264.7647865	65.0000885	-0.000461656	0.382052094	0.019607844	0	281.7408	984.8926	652.2076	0.827	3.7036	1107	1.252570044	0.002893437	36.7612761	0.084918548
26.24871385	×ÔÉí³µÁ¾	Road 1	265.0660279	65.01988449	-0.000454583	0.38199228	0.019607844	0	282.1205	984.8984	652.1882	0.8281	3.7026	1108	1.472515947	0.003401512	36.78583625	0.084975282
26.26535476	×ÔÉí³µÁ¾	Road 1	265.3666414	65.03299942	-0.000449729	0.382187724	0.019607844	0	282.3737	984.9033	652.1753	0.8278	3.7029	1109	1.248697993	0.002884492	36.80661573	0.085023282
26.28209135	×ÔÉí³µÁ¾	Road 1	265.6690445	65.04618988	-0.000443843	0.382141858	0.019607844	0	282.6269	984.9072	652.1624	0.8285	3.7022	1110	1.248894576	0.002884946	36.82751796	0.085071566
26.29871724	×ÔÉí³µÁ¾	Road 1	265.9695128	65.06034164	-0.000441716	0.382547945	0.019607844	0	282.8983	984.9121	652.1485	0.8285	3.7021	1111	1.284553445	0.002967318	36.8488748	0.085120901
26.31536255	×ÔÉí³µÁ¾	Road 1	266.2704281	65.08106461	-0.000439066	0.381612569	0.019607844	0	283.2964	984.9189	652.1282	0.8289	3.7017	1112	1.506283236	0.003479514	36.87394736	0.085178818
26.33204232	×ÔÉí³µÁ¾	Road 1	266.5720272	65.09424133	-0.000439066	0.381992251	0.019607844	0	283.5498	984.9229	652.1152	0.8296	3.701	1113	1.250642555	0.002888984	36.89480779	0.085227006
26.34875728	×ÔÉí³µÁ¾	Road 1	266.874324	65.10743866	-0.000439066	0.381949037	0.019607844	0	283.8033	984.9277	652.1023	0.8294	3.7013	1114	1.2505929	0.00288887	36.9157114	0.085275293
26.36537877	×ÔÉí³µÁ¾	Road 1	267.1749998	65.12250366	-0.000439066	0.381902665	0.019607844	0	284.093	984.9326	652.0875	0.8297	3.7009	1115	1.316535357	0.003041197	36.93759418	0.085325843
26.38202299	×ÔÉí³µÁ¾	Road 1	267.4761869	65.14416046	-0.000439066	0.381433249	0.019607844	0	284.5096	984.9395	652.0662	0.8305	3.7002	1116	1.539075006	0.003555263	36.96321088	0.085385017
26.39875444	×ÔÉí³µÁ¾	Road 1	267.7790094	65.15638275	-0.000441185	0.381792963	0.019607844	0	284.7451	984.9434	652.0542	0.8308	3.6998	1117	1.218061833	0.002813723	36.98359083	0.085432095
26.41535504	×ÔÉí³µÁ¾	Road 1	268.0795286	65.17050018	-0.000445443	0.381749779	0.019607844	0	285.017	984.9482	652.0403	0.8309	3.6998	1118	1.285786341	0.002970166	37.00493564	0.085481401
26.43212022	×ÔÉí³µÁ¾	Road 1	268.3831243	65.19134674	-0.000454042	0.381203473	0.027450981	0	285.4158	984.9551	652.0199	0.8313	3.6994	1119	1.507465674	0.003482246	37.03020857	0.085539782
26.44877579	×ÔÉí³µÁ¾	Road 1	268.6847952	65.20429001	-0.000461656	0.381923616	0.027450981	0	285.6696	984.96	652.007	0.831	3.6996	1120	1.244999469	0.002875949	37.05094476	0.085587682
26.46538922	×ÔÉí³µÁ¾	Road 1	268.9857943	65.2241684	-0.000474906	0.382459313	0.027450981	0	286.0505	984.9658	651.9875	0.832	3.6986	1121	1.481636692	0.003422581	37.07555982	0.085644543
26.48203893	×ÔÉí³µÁ¾	Road 1	269.287512	65.23738632	-0.000490682	0.382852912	0.027450981	0	286.3044	984.9707	651.9746	0.8317	3.6989	1122	1.254931868	0.002898893	37.09645408	0.085692809
26.4987143	×ÔÉí³µÁ¾	Road 1	269.5897563	65.25069351	-0.000508551	0.38258943	0.027450981	0	286.5585	984.9746	651.9616	0.8324	3.6981	1123	1.257455834	0.002904723	37.11742262	0.085741246
26.51543476	×ÔÉí³µÁ¾	Road 1	269.8929097	65.27045517	-0.000528044	0.383199275	0.027450981	0	286.9396	984.9814	651.9421	0.8324	3.6981	1124	1.474218862	0.003405446	37.14207224	0.085798187
26.53210867	×ÔÉí³µÁ¾	Road 1	270.1952803	65.2836937	-0.000552949	0.38360849	0.027450981	0	287.1938	984.9854	651.9291	0.8331	3.6973	1125	1.255656803	0.002900567	37.16300894	0.085846551
26.54876571	×ÔÉí³µÁ¾	Road 1	270.4974109	65.29790726	-0.000572921	0.383558661	0.027450981	0	287.4661	984.9902	651.9153	0.8332	3.6973	1126	1.289343458	0.002978383	37.18448559	0.085896162
26.56536961	×ÔÉí³µÁ¾	Road 1	270.7986647	65.31683121	-0.000589499	0.383937091	0.027450981	0	287.8293	984.9961	651.8967	0.8339	3.6965	1127	1.451265743	0.003352424	37.20858225	0.085951825
26.5820754	×ÔÉí³µÁ¾	Road 1	271.101829	65.33011093	-0.000608363	0.383897007	0.027450981	0	288.0837	985.001	651.8837	0.8336	3.6968	1128	1.256872753	0.002903376	37.22957931	0.086000328
26.59876764	×ÔÉí³µÁ¾	Road 1	271.4048396	65.35004425	-0.000624276	0.383879572	0.027450981	0	288.4653	985.0078	651.8643	0.8336	3.6967	1129	1.482585362	0.003424772	37.25432698	0.086057495
26.61534514	×ÔÉí³µÁ¾	Road 1	271.705829	65.36339264	-0.000639784	0.383551031	0.027450981	0	288.7197	985.0117	651.8513	0.8343	3.696	1130	1.263174153	0.002917932	37.27526725	0.086105867
26.63204617	×ÔÉí³µÁ¾	Road 1	272.0091272	65.37761993	-0.000657622	0.384390265	0.027450981	0	288.9924	985.0166	651.8373	0.8344	3.6959	1131	1.289746114	0.002979314	37.29680734	0.086155625
26.64877213	×ÔÉí³µÁ¾	Road 1	272.3129705	65.39749146	-0.000671566	0.384560376	0.027450981	0	289.3743	985.0234	651.8179	0.8344	3.6958	1132	1.479996014	0.003418791	37.32156169	0.086212807
26.66536686	×ÔÉí³µÁ¾	Road 1	272.6144954	65.41171875	-0.000682863	0.384521037	0.027450981	0	289.6471	985.0283	651.804	0.8345	3.6957	1133	1.293346746	0.002987631	37.34302443	0.086262386
26.68211078	×ÔÉí³µÁ¾	Road 1	272.918793	65.42503281	-0.000697881	0.384920657	0.027450981	0	289.9018	985.0322	651.7909	0.8352	3.695	1134	1.258399018	0.002906902	37.36409496	0.086311059
26.6987451	×ÔÉí³µÁ¾	Road 1	273.2211606	65.43840179	-0.000709469	0.384218693	0.027450981	0	290.1566	985.0371	651.7778	0.8349	3.6953	1135	1.263424519	0.002918511	37.38511116	0.086359607
26.71537538	×ÔÉí³µÁ¾	Road 1	273.5235512	65.45925522	-0.000724135	0.384810656	0.027450981	0	290.557	985.0439	651.7574	0.8353	3.6948	1136	1.518366455	0.003507427	37.41036203	0.086417936
26.73205295	×ÔÉí³µÁ¾	Road 1	273.8268676	65.47350311	-0.000740499	0.384319276	0.027450981	0	290.8301	985.0488	651.7435	0.8353	3.6948	1137	1.292574432	0.002985847	37.43191903	0.086467733
26.74874629	×ÔÉí³µÁ¾	Road 1	274.1305368	65.48777847	-0.000757108	0.385158122	0.027450981	0	291.1033	985.0527	651.7296	0.8364	3.6937	1138	1.293265343	0.002987443	37.45350794	0.086517603
26.76541873	×ÔÉí³µÁ¾	Road 1	274.4339186	65.50775986	-0.000775507	0.38509813	0.027450981	0	291.4858	985.0596	651.71	0.8374	3.6936	1139	1.487873716	0.003436988	37.47831443	0.086574906
26.78208787	×ÔÉí³µÁ¾	Road 1	274.737302	65.52108765	-0.000799712	0.385048538	0.027450981	0	291.7408	985.0645	651.697	0.8372	3.6939	1140	1.262292149	0.002915895	37.49935576	0.086623512
26.79873758	×ÔÉí³µÁ¾	Road 1	275.0404022	65.53631058	-0.000822002	0.384569436	0.027450981	0	291.996	985.0684	651.684	0.8379	3.6932	1141	1.327495903	0.003066516	37.52145818	0.086674568
26.8153807	×ÔÉí³µÁ¾	Road 1	275.3434663	65.55447922	-0.0008488	0.384710014	0.027450981	0	292.3788	985.0752	651.6644	0.8379	3.6931	1142	1.428230471	0.003299212	37.54522839	0.086729478
26.83210849	×ÔÉí³µÁ¾	Road 1	275.6481338	65.56771774	-0.000876174	0.384897858	0.027450981	0	292.634	985.0801	651.6514	0.8377	3.6934	1143	1.258365652	0.002906825	37.56627806	0.086778102
26.84875307	×ÔÉí³µÁ¾	Road 1	275.9513783	65.58772659	-0.000903275	0.385279655	0.027450981	0	293.017	985.0859	651.6318	0.8387	3.6923	1144	1.491395711	0.003445124	37.59110172	0.086835445
26.86536283	×ÔÉí³µÁ¾	Road 1	276.2540502	65.60111618	-0.000932676	0.38455084	0.027450981	0	293.2724	985.0908	651.6188	0.8385	3.6926	1145	1.267196805	0.002927225	37.61214955	0.086884065
26.91545822	×ÔÉí³µÁ¾	Road 1	277.1673787	65.63442535	-0.000962707	0.385330826	0.027450981	0	293.9111	985.1016	651.5862	0.8393	3.6918	1146	1.187541355	0.002743221	37.67163991	0.087021488
26.93208044	×ÔÉí³µÁ¾	Road 1	277.4705763	65.66579819	-0.00098701	0.385231912	0.027450981	0	294.5135	985.1123	651.5554	0.8394	3.6916	1147	1.881545817	0.004346371	37.70291538	0.087093735
26.94868764	×ÔÉí³µÁ¾	Road 1	277.7735613	65.67913284	-0.001050022	0.384771764	0.027450981	0	294.7693	985.1172	651.5424	0.8391	3.6919	1148	1.266540734	0.002925709	37.72394907	0.087142322
26.96541653	×ÔÉí³µÁ¾	Road 1	278.0788287	65.6925087	-0.001062366	0.384901404	0.027450981	0	295.025	985.1221	651.5294	0.8389	3.6922	1149	1.264819673	0.002921733	37.7451081	0.0871912
26.98232246	×ÔÉí³µÁ¾	Road 1	278.3873935	65.70669479	-0.001073846	0.384699434	0.027450981	0	295.299	985.126	651.5153	0.84	3.6911	1150	1.287482435	0.002974084	37.76687419	0.087241479
27.00003189	×ÔÉí³µÁ¾	Road 1	278.7107214	65.72660751	-0.001084441	0.38526994	0.027450981	0	295.6828	985.1328	651.4957	0.8401	3.691	1151	1.449785767	0.003349005	37.79254907	0.087300788
27.01614973	×ÔÉí³µÁ¾	Road 1	279.005081	65.7466713	-0.00109219	0.384970605	0.027450981	0	296.0667	985.1396	651.4761	0.8403	3.6909	1152	1.518537286	0.003507821	37.81702461	0.087357327
27.03230533	×ÔÉí³µÁ¾	Road 1	279.3001937	65.76085052	-0.001097053	0.384752095	0.027450981	0	296.341	985.1445	651.4622	0.8404	3.6909	1153	1.310200741	0.003026564	37.83819168	0.087406223
27.04873951	×ÔÉí³µÁ¾	Road 1	279.600456	65.77416458	-0.001104862	0.385112196	0.027450981	0	296.5971	985.1494	651.4491	0.8402	3.6911	1154	1.272031417	0.002938393	37.85909647	0.087454513
27.0653478	×ÔÉí³µÁ¾	Road 1	279.9039653	65.78843994	-0.001110743	0.385522306	0.027450981	0	296.8715	985.1543	651.4351	0.8403	3.692	1155	1.300314992	0.003003728	37.88069249	0.0875044
27.08239522	×ÔÉí³µÁ¾	Road 1	280.2155673	65.8027153	-0.001120592	0.385023057	0.027450981	0	297.146	985.1592	651.421	0.8414	3.6919	1156	1.287942508	0.002975147	37.90264859	0.087555118
27.09866995	×ÔÉí³µÁ¾	Road 1	280.5131443	65.82458496	-0.001129505	0.385393649	0.035294119	0	297.5669	985.167	651.3995	0.8413	3.6922	1157	1.576257486	0.003641155	37.92830175	0.087614377
27.11536218	×ÔÉí³µÁ¾	Road 1	280.8184171	65.83793335	-0.001139464	0.385364652	0.035294119	0	297.8232	985.1709	651.3864	0.842	3.6915	1158	1.267018514	0.002926813	37.94945112	0.087663232
27.13209364	×ÔÉí³µÁ¾	Road 1	281.1245003	65.85796967	-0.001154511	0.38486588	0.035294119	0	298.2078	985.1777	651.3668	0.8422	3.6915	1159	1.493687194	0.003450417	37.97444268	0.087720963
27.14880567	×ÔÉí³µÁ¾	Road 1	281.4302897	65.87122879	-0.00117478	0.385686755	0.043137256	0	298.4642	985.1826	651.3538	0.842	3.6917	1160	1.263928498	0.002919675	37.99556549	0.087769756
27.16539343	×ÔÉí³µÁ¾	Road 1	281.7338672	65.88464584	-0.001196317	0.385408461	0.043137256	0	298.7207	985.1875	651.3407	0.8418	3.6917	1161	1.272928326	0.002940464	38.01668053	0.087818532
27.18211353	×ÔÉí³µÁ¾	Road 1	282.0399594	65.90465469	-0.00122125	0.384940088	0.043137256	0	299.1055	985.1943	651.321	0.842	3.6916	1162	1.4940616	0.003451282	38.04166137	0.087876238
27.19873611	×ÔÉí³µÁ¾	Road 1	282.3443282	65.91799622	-0.001244407	0.385728866	0.050980393	0	299.3622	985.1982	651.3079	0.8428	3.6908	1163	1.269867714	0.002933394	38.06276986	0.087924998
27.21539536	×ÔÉí³µÁ¾	Road 1	282.6494298	65.93131027	-0.001272151	0.385249972	0.050980393	0	299.6188	985.2031	651.2947	0.8426	3.6911	1164	1.268118297	0.002929353	38.08389575	0.087973799
27.23201575	×ÔÉí³µÁ¾	Road 1	282.9539166	65.95225983	-0.001306859	0.384781688	0.050980393	0	300.0222	985.2109	651.2742	0.8421	3.6916	1165	1.531264439	0.003537221	38.10934596	0.088032589
27.24876516	×ÔÉí³µÁ¾	Road 1	283.2608291	65.96558762	-0.001335519	0.385571599	0.050980393	0	300.2791	985.2148	651.261	0.8429	3.6909	1166	1.266636403	0.00292593	38.13056138	0.088081597
27.26540718	×ÔÉí³µÁ¾	Road 1	283.5658353	65.97891541	-0.00136685	0.385542542	0.050980393	0	300.5359	985.2197	651.2479	0.8427	3.6911	1167	1.269759469	0.002933144	38.15169274	0.08813041
27.28204443	×ÔÉí³µÁ¾	Road 1	283.8708468	65.99897232	-0.001399812	0.383975029	0.05882353	0	300.9213	985.2266	651.2283	0.8429	3.691	1168	1.500815969	0.003466885	38.17666219	0.08818809
27.29869818	×ÔÉí³µÁ¾	Road 1	284.1762219	66.01220398	-0.001424009	0.385415673	0.05882353	0	301.1783	985.2314	651.2151	0.8436	3.6912	1169	1.266634721	0.002925926	38.19775641	0.088236817
27.31539921	×ÔÉí³µÁ¾	Road 1	284.4825568	66.0321991	-0.001448484	0.384917408	0.05882353	0	301.5638	985.2383	651.1955	0.8437	3.691	1170	1.496682829	0.003457337	38.22275255	0.088294558
27.33206358	×ÔÉí³µÁ¾	Road 1	284.7882811	66.04552689	-0.001475609	0.385758996	0.05882353	0	301.821	985.2432	651.1824	0.8435	3.6913	1171	1.270125311	0.002933989	38.2439184	0.088343451
27.34868764	×ÔÉí³µÁ¾	Road 1	285.0933273	66.05887527	-0.001499469	0.386599749	0.05882353	0	302.0781	985.248	651.1693	0.8433	3.6915	1172	1.272135943	0.002938634	38.26506646	0.088392304
27.36578455	×ÔÉí³µÁ¾	Road 1	285.4071459	66.07898712	-0.001519952	0.38830933	0.05882353	0	302.464	985.2549	651.1495	0.8435	3.6913	1173	1.485600095	0.003431736	38.29046563	0.088450976
27.38204278	×ÔÉí³µÁ¾	Road 1	285.7056311	66.09247284	-0.00154062	0.389149427	0.05882353	0	302.7213	985.2598	651.1364	0.8433	3.6915	1174	1.287772301	0.002974754	38.31140253	0.08849934
27.39925992	×ÔÉí³µÁ¾	Road 1	286.0218184	66.11284561	-0.001555322	0.390170038	0.05882353	0	303.1073	985.2666	651.1167	0.8434	3.6914	1175	1.490171043	0.003442295	38.33705902	0.088558606
27.41541552	×ÔÉí³µÁ¾	Road 1	286.3185714	66.12637253	-0.001572592	0.391699284	0.06666667	0	303.3647	985.2715	651.1035	0.8432	3.6916	1176	1.29274703	0.002986246	38.35794411	0.088606851
27.43212351	×ÔÉí³µÁ¾	Road 1	286.6255347	66.14005737	-0.001591236	0.393029422	0.06666667	0	303.6222	985.2764	651.0905	0.8429	3.6918	1177	1.282532949	0.002962651	38.37937267	0.088656351
27.44872484	×ÔÉí³µÁ¾	Road 1	286.9306015	66.15376968	-0.001602494	0.396276504	0.06666667	0	303.8797	985.2813	651.0773	0.8427	3.692	1178	1.286690657	0.002972255	38.40073344	0.088705694
27.46537712	×ÔÉí³µÁ¾	Road 1	287.2367064	66.17579727	-0.001618848	0.397986174	0.06666667	0	304.2845	985.2881	651.0566	0.8434	3.6915	1179	1.57106869	0.003629169	38.42689532	0.088766128
27.4820316	×ÔÉí³µÁ¾	Road 1	287.5429167	66.18981857	-0.001639128	0.400105119	0.074509807	0	304.5422	985.293	651.0435	0.8432	3.6917	1180	1.296330984	0.002994525	38.44848503	0.088816
27.49875829	×ÔÉí³µÁ¾	Road 1	287.8505529	66.21096725	-0.001657011	0.403443247	0.074509807	0	304.9288	985.2998	651.0237	0.8434	3.6908	1181	1.538321505	0.003553523	38.47421606	0.088875439
27.51540141	×ÔÉí³µÁ¾	Road 1	288.1567182	66.22529068	-0.001677608	0.406860799	0.074509807	0	305.1866	985.3047	651.0106	0.8432	3.691	1182	1.307581005	0.003020512	38.49597828	0.08892571
27.53207495	×ÔÉí³µÁ¾	Road 1	288.4635154	66.24087067	-0.001699679	0.40882045	0.082352944	0	305.4629	985.3105	650.9965	0.8424	3.6918	1183	1.350050923	0.003118618	38.51848841	0.088977708
27.54867774	×ÔÉí³µÁ¾	Road 1	288.7691114	66.26269226	-0.001721943	0.413415253	0.082352944	0	305.8498	985.3174	650.9767	0.8425	3.6917	1184	1.567892726	0.003621832	38.54451981	0.089037841
27.56534248	×ÔÉí³µÁ¾	Road 1	289.0759212	66.27856064	-0.0017444	0.416004419	0.082352944	0	306.1263	985.3223	650.9626	0.8427	3.6915	1185	1.360840759	0.003143542	38.56719787	0.089090227
27.58206771	×ÔÉí³µÁ¾	Road 1	289.3839191	66.29463501	-0.001760368	0.418397248	0.082352944	0	306.4027	985.3281	650.9485	0.8418	3.6924	1186	1.366180057	0.003155876	38.59004754	0.08914301
27.59873282	×ÔÉí³µÁ¾	Road 1	289.6908798	66.30970001	-0.001776435	0.420976192	0.090196081	0	306.6609	985.332	650.9353	0.8426	3.6916	1187	1.333708764	0.003080867	38.61227394	0.089194353
27.61532388	×ÔÉí³µÁ¾	Road 1	289.9965814	66.33242798	-0.001783158	0.424695402	0.090196081	0	307.0482	985.3398	650.9155	0.8418	3.6924	1188	1.601065625	0.003698462	38.63883732	0.089255714
27.63210225	×ÔÉí³µÁ¾	Road 1	290.305806	66.34782944	-0.00179395	0.428152591	0.090196081	0	307.3065	985.3447	650.9023	0.8416	3.6926	1189	1.342299811	0.003100713	38.66135893	0.089307739
27.64872887	×ÔÉí³µÁ¾	Road 1	290.612342	66.37124405	-0.001798008	0.43179208	0.098039217	0	307.694	985.3516	650.8826	0.8418	3.6914	1190	1.623826434	0.003751039	38.68835768	0.089370106
27.66540278	×ÔÉí³µÁ¾	Road 1	290.9198173	66.3858284	-0.001804785	0.432252556	0.098039217	0	307.8232	985.3545	650.876	0.8412	3.692	1191	1.318087749	0.003044783	38.71033535	0.089420875
27.682025	×ÔÉí³µÁ¾	Road 1	291.2264228	66.40386658	-0.001804785	0.436819345	0.098039217	0	308.2294	985.3623	650.8553	0.8408	3.6925	1192	1.439134541	0.003324401	38.73425696	0.089476134
27.69866885	×ÔÉí³µÁ¾	Road 1	291.5335011	66.41985168	-0.001804785	0.43941772	0.098039217	0	308.488	985.3672	650.842	0.8406	3.6927	1193	1.36781313	0.003159648	38.75702264	0.089528722
27.71532993	×ÔÉí³µÁ¾	Road 1	291.8409824	66.43824005	-0.001804785	0.440888047	0.098039217	0	308.765	985.3721	650.8279	0.8407	3.6925	1194	1.450335973	0.003350276	38.7811868	0.089584542
27.73198881	×ÔÉí³µÁ¾	Road 1	292.14853	66.46135254	-0.001804785	0.442808628	0.098039217	0	309.1531	985.3799	650.8081	0.84	3.6933	1195	1.613645153	0.00372752	38.80806831	0.089646638
27.74869167	×ÔÉí³µÁ¾	Road 1	292.4569652	66.4776123	-0.001804785	0.444517463	0.098039217	0	309.4119	985.3848	650.7949	0.8398	3.6935	1196	1.376237138	0.003179108	38.83105542	0.089699738
27.76530986	×ÔÉí³µÁ¾	Road 1	292.7639552	66.50327911	-0.001804785	0.446199059	0.098039217	0	309.8187	985.3926	650.7742	0.8393	3.6929	1197	1.704731529	0.00393793	38.85938497	0.089765179
27.78220993	×ÔÉí³µÁ¾	Road 1	293.0762242	66.51856384	-0.001804785	0.445940614	0.098039217	0	310.0591	985.3975	650.7618	0.8386	3.6935	1198	1.337213189	0.003088962	38.88198397	0.089817383
27.79863201	×ÔÉí³µÁ¾	Road 1	293.3797357	66.53488541	-0.001804785	0.44741106	0.098039217	0	310.3181	985.4023	650.7487	0.8384	3.6937	1199	1.388896808	0.003208352	38.90479254	0.089870071
27.81536237	×ÔÉí³µÁ¾	Road 1	293.6890703	66.56191864	-0.001804785	0.447792798	0.098039217	0	310.7438	985.4102	650.7269	0.8371	3.6937	1200	1.746977143	0.004035517	38.93402009	0.089937586
27.83199155	×ÔÉí³µÁ¾	Road 1	293.9966	66.57612534	-0.001804785	0.44836539	0.098039217	0	310.9659	985.415	650.7156	0.8364	3.6946	1201	1.309295919	0.003024474	38.95579262	0.089987881
27.84864567	×ÔÉí³µÁ¾	Road 1	294.3046777	66.59495316	-0.001804785	0.448736429	0.098039217	0	311.2622	985.4199	650.7004	0.837	3.6941	1202	1.468496982	0.003392228	38.98024913	0.090044375
27.86536649	×ÔÉí³µÁ¾	Road 1	294.61411	66.62090149	-0.001804785	0.449099779	0.098039217	0	311.6697	985.4287	650.6797	0.8357	3.6955	1203	1.711448933	0.003953447	39.00886597	0.09011048
27.88203123	×ÔÉí³µÁ¾	Road 1	294.9225865	66.63860321	-0.001804785	0.449042141	0.098039217	0	311.9476	985.4336	650.6655	0.8359	3.6954	1204	1.429943396	0.003303169	39.03269561	0.090165527
27.89864906	×ÔÉí³µÁ¾	Road 1	295.2302706	66.6551239	-0.001804785	0.44902429	0.098039217	0	312.2071	985.4385	650.6523	0.8358	3.6946	1205	1.391022768	0.003213263	39.05581138	0.090218924
27.91537098	×ÔÉí³µÁ¾	Road 1	295.5399975	66.67991867	-0.001804785	0.448907495	0.098039217	0	312.5964	985.4463	650.6324	0.835	3.6953	1206	1.672903342	0.003864407	39.08378554	0.090283545
27.93200017	×ÔÉí³µÁ¾	Road 1	295.8480942	66.69889069	-0.001804785	0.44948867	0.098039217	0	312.8932	985.4521	650.6172	0.8346	3.6958	1207	1.476294242	0.00341024	39.10833511	0.090340254
27.94863412	×ÔÉí³µÁ¾	Road 1	296.1563553	66.71534958	-0.001804785	0.449280947	0.098039217	0	313.1529	985.457	650.604	0.8344	3.696	1208	1.389311455	0.003209309	39.13144485	0.090393638
27.96531462	×ÔÉí³µÁ¾	Road 1	296.4655612	66.7330719	-0.001804785	0.449173808	0.098039217	0	313.4127	985.4629	650.5908	0.8333	3.6971	1209	1.431678576	0.003307178	39.15532597	0.090448803
27.98199073	×ÔÉí³µÁ¾	Road 1	296.7747951	66.75670624	-0.001804785	0.449536502	0.098039217	0	313.8024	985.4697	650.5709	0.8335	3.6967	1210	1.636703939	0.003780786	39.18261982	0.090511852
27.99875224	×ÔÉí³µÁ¾	Road 1	297.0856897	66.77324066	-0.001804785	0.44908914	0.098039217	0	314.0623	985.4756	650.5576	0.8324	3.6977	1211	1.388511591	0.003207462	39.20589338	0.090565614
28.01530995	×ÔÉí³µÁ¾	Road 1	297.3929186	66.79813843	-0.00179395	0.449600548	0.098039217	0	314.4524	985.4834	650.5377	0.8316	3.6972	1212	1.687414927	0.003897928	39.2338331	0.090630154
28.03205973	×ÔÉí³µÁ¾	Road 1	297.703788	66.81458359	-0.001781812	0.449353963	0.098039217	0	314.7125	985.4883	650.5244	0.8315	3.6974	1213	1.386508013	0.003202834	39.25705681	0.090683801
28.0486431	×ÔÉí³µÁ¾	Road 1	298.0116829	66.83937836	-0.001765713	0.449706107	0.105882354	0	315.1027	985.4961	650.5045	0.8308	3.6983	1214	1.683341722	0.003888519	39.28497228	0.090748286
28.06538959	×ÔÉí³µÁ¾	Road 1	298.3226446	66.84759064	-0.001749712	0.450800002	0.105882354	0	315.2328	985.499	650.4979	0.8302	3.699	1215	1.103203295	0.0025484	39.30344706	0.090790963
28.08207339	×ÔÉí³µÁ¾	Road 1	298.6325586	66.87266006	-0.001733807	0.45313397	0.105882354	0	315.6233	985.5068	650.478	0.8295	3.6999	1216	1.68834025	0.003900066	39.331615	0.090856031
28.09869488	×ÔÉí³µÁ¾	Road 1	298.9414309	66.89775696	-0.001716687	0.453534216	0.105882354	0	316.0139	985.5146	650.4581	0.8287	3.7006	1217	1.693072513	0.003910998	39.35975638	0.090921037
28.11546629	×ÔÉí³µÁ¾	Road 1	299.2531673	66.91451797	-0.001694469	0.454324275	0.105882354	0	316.2744	985.5195	650.4448	0.8286	3.7008	1218	1.398289128	0.003230048	39.38320766	0.09097521
28.13199357	×ÔÉí³µÁ¾	Road 1	299.560476	66.9396904	-0.001677608	0.454705	0.105882354	0	316.5349	985.5244	650.4315	0.8284	3.6999	1219	1.701557046	0.003930597	39.41132978	0.091040172
28.14867371	×ÔÉí³µÁ¾	Road 1	299.8707102	66.95647202	-0.00166343	0.455496877	0.113725491	0	316.9258	985.5322	650.4115	0.8277	3.7006	1220	1.40285609	0.003240598	39.43472961	0.091094225
28.16532159	×ÔÉí³µÁ¾	Road 1	300.1804225	66.97334976	-0.00165061	0.457197785	0.113725491	0	317.1866	985.5381	650.3982	0.8266	3.7018	1221	1.407603475	0.003251564	39.45816323	0.091148357
28.18198083	×ÔÉí³µÁ¾	Road 1	300.4904642	66.99883804	-0.001628967	0.459399492	0.121568628	0	317.5777	985.5459	650.3783	0.8259	3.7025	1222	1.706794517	0.003942695	39.48659713	0.091214039
28.19874601	×ÔÉí³µÁ¾	Road 1	300.8025571	67.01594925	-0.001612545	0.462348551	0.121568628	0	317.8386	985.5508	650.365	0.8258	3.7026	1223	1.412263333	0.003262328	39.51027398	0.091268733
28.21539463	×ÔÉí³µÁ¾	Road 1	301.1125655	67.03442688	-0.001596233	0.464926898	0.121568628	0	318.1182	985.5566	650.3507	0.825	3.7034	1224	1.464243111	0.003382402	39.5346516	0.091325045
28.23204837	×ÔÉí³µÁ¾	Road 1	301.4227499	67.05182648	-0.001572592	0.465987593	0.137254909	0	318.3792	985.5625	650.3373	0.8239	3.7045	1225	1.426847484	0.003296018	39.55841395	0.091379936
28.24869369	×ÔÉí³µÁ¾	Road 1	301.7329041	67.07924423	-0.001550411	0.472268015	0.137254909	0	318.7895	985.5703	650.3164	0.8235	3.7049	1226	1.776395307	0.004103473	39.58798261	0.09144824
28.26540168	×ÔÉí³µÁ¾	Road 1	302.0443146	67.09827118	-0.001524798	0.475346446	0.145098045	0	319.0693	985.5762	650.3021	0.8227	3.7047	1227	1.482124091	0.003423707	39.61274593	0.091505443
28.28205139	×ÔÉí³µÁ¾	Road 1	302.3547218	67.11622009	-0.001489894	0.477164984	0.145098045	0	319.3306	985.5811	650.2888	0.8226	3.7048	1228	1.447207658	0.00334305	39.63684153	0.091561104
28.29869341	×ÔÉí³µÁ¾	Road 1	302.6651154	67.14433136	-0.001448484	0.478259414	0.152941182	0	319.7413	985.5898	650.2679	0.8213	3.7061	1229	1.802188263	0.004163055	39.66683357	0.091630386
28.31538308	×ÔÉí³µÁ¾	Road 1	302.9764815	67.162397	-0.001400958	0.482094973	0.160784319	0	320.0027	985.5957	650.2545	0.8202	3.7072	1230	1.450557703	0.003350788	39.6910429	0.091686309
28.33206065	×ÔÉí³µÁ¾	Road 1	303.2877493	67.18988342	-0.001341079	0.48602587	0.160784319	0	320.395	985.6035	650.2345	0.8195	3.7079	1231	1.779370925	0.004110347	39.72071848	0.09175486
28.3487078	×ÔÉí³µÁ¾	Road 1	303.5985349	67.20839539	-0.001289427	0.49035266	0.168627456	0	320.6566	985.6084	650.2212	0.8184	3.708	1232	1.468519078	0.003392279	39.74516514	0.091811331
28.36535824	×ÔÉí³µÁ¾	Road 1	303.9094684	67.22706528	-0.001237008	0.493729085	0.176470593	0	320.9183	985.6143	650.2079	0.8173	3.7091	1233	1.474224704	0.003405459	39.76971164	0.091868034
28.38201932	×ÔÉí³µÁ¾	Road 1	304.2207314	67.25535507	-0.001179884	0.498977393	0.184313729	0	321.311	985.6221	650.1878	0.8166	3.7098	1234	1.809774827	0.00418058	39.79986444	0.091937687
28.39879	×ÔÉí³µÁ¾	Road 1	304.5341312	67.27451935	-0.001132486	0.504581988	0.192156866	0	321.5729	985.6279	650.1744	0.8155	3.7109	1235	1.487514654	0.003436159	39.82481106	0.091995314
28.41530848	×ÔÉí³µÁ¾	Road 1	304.8429073	67.29395142	-0.00109025	0.509369075	0.20784314	0	321.8348	985.6328	650.1611	0.8153	3.7101	1236	1.507427342	0.003482157	39.84971148	0.092052834
28.43203921	×ÔÉí³µÁ¾	Road 1	305.1557951	67.32501526	-0.001046243	0.518462598	0.20784314	0	322.2466	985.6416	650.1401	0.814	3.7114	1237	1.903653953	0.004397441	39.88156099	0.092126406
28.44866986	×ÔÉí³µÁ¾	Road 1	305.4669049	67.3452301	-0.001011719	0.523448825	0.215686277	0	322.5088	985.6475	650.1267	0.8129	3.7125	1238	1.53111597	0.003536878	39.90702444	0.092185226
28.46541011	×ÔÉí³µÁ¾	Road 1	305.7801666	67.36708603	-0.000985196	0.529453218	0.215686277	0	322.7897	985.6533	650.1124	0.8121	3.7132	1239	1.583938131	0.003658897	39.93353997	0.092246477
28.48203967	×ÔÉí³µÁ¾	Road 1	306.0915	67.39810181	-0.000962707	0.536179066	0.223529413	0	323.1832	985.6611	650.0923	0.8114	3.7139	1240	1.910290039	0.00441277	39.96530724	0.09231986
28.49869708	×ÔÉí³µÁ¾	Road 1	306.4034525	67.41918869	-0.000946729	0.540706217	0.223529413	0	323.4456	985.667	650.0789	0.8103	3.715	1241	1.561823055	0.003607811	39.99132317	0.092379957
28.51529254	×ÔÉí³µÁ¾	Road 1	306.7143426	67.44037857	-0.000932676	0.546480656	0.223529413	0	323.7081	985.6719	650.0655	0.8101	3.7151	1242	1.568589352	0.003623441	40.01735463	0.092440089
28.53198294	×ÔÉí³µÁ¾	Road 1	307.0271112	67.46193924	-0.000923963	0.549259186	0.223529413	0	323.9707	985.6777	650.0521	0.809	3.7162	1243	1.577709028	0.003644508	40.04368723	0.092500918
28.54863485	×ÔÉí³µÁ¾	Road 1	307.3392799	67.4881897	-0.000918762	0.552258611	0.223529413	0	324.2897	985.6846	650.0359	0.8079	3.7172	1244	1.7441485	0.004028983	40.07273064	0.092568008
28.56533955	×ÔÉí³µÁ¾	Road 1	307.6525537	67.51308746	-0.000917032	0.55559659	0.223529413	0	324.5901	985.6904	650.0206	0.8075	3.7176	1245	1.694547937	0.003914406	40.10103755	0.092633397
28.58195774	×ÔÉí³µÁ¾	Road 1	307.964328	67.53968811	-0.000917032	0.557754338	0.223529413	0	324.9093	985.6973	650.0043	0.8064	3.7187	1246	1.759412249	0.004064242	40.13027579	0.092700937
28.59869873	×ÔÉí³µÁ¾	Road 1	308.2785301	67.56636429	-0.000914442	0.560083866	0.223529413	0	325.2286	985.7041	649.9879	0.8054	3.7187	1247	1.755767723	0.004055823	40.15966908	0.092768836
28.61532095	×ÔÉí³µÁ¾	Road 1	308.5906717	67.60286636	-0.000914442	0.56231302	0.223529413	0	325.6609	985.7129	649.9659	0.8044	3.7197	1248	2.108394507	0.004870391	40.19471528	0.092849792
28.63196443	×ÔÉí³µÁ¾	Road 1	308.9033153	67.62508621	-0.000914442	0.563141525	0.223529413	0	325.9241	985.7188	649.9525	0.8033	3.7207	1249	1.606065934	0.003710012	40.22144581	0.09291154
28.64935972	×ÔÉí³µÁ¾	Road 1	309.2302503	67.66004333	-0.000914442	0.565410316	0.223529413	0	326.338	985.7275	649.9314	0.802	3.722	1250	2.00097226	0.004622246	40.2562533	0.092991945
28.66533863	×ÔÉí³µÁ¾	Road 1	309.5306645	67.68240051	-0.00091358	0.565799236	0.223529413	0	326.6014	985.7324	649.9179	0.8019	3.7221	1251	1.644669989	0.003799188	40.28253334	0.093052652
28.68203417	×ÔÉí³µÁ¾	Road 1	309.8446559	67.70487442	-0.000910136	0.566360176	0.223529413	0	326.8649	985.7383	649.9045	0.8008	3.7232	1252	1.614072816	0.003728508	40.30948115	0.093114901
28.69864393	×ÔÉí³µÁ¾	Road 1	310.1571893	67.73849945	-0.000907559	0.567120314	0.223529413	0	327.2604	985.7471	649.8843	0.7991	3.7248	1253	2.011641639	0.004646892	40.34289403	0.093192085
28.71534606	×ÔÉí³µÁ¾	Road 1	310.4715649	67.76093903	-0.000900711	0.567480624	0.223529413	0	327.5242	985.752	649.8708	0.799	3.7249	1254	1.613646415	0.003727523	40.36984536	0.093254343
28.73203792	×ÔÉí³µÁ¾	Road 1	310.7858663	67.7866127	-0.000893048	0.568250418	0.223529413	0	327.8257	985.7588	649.8555	0.7976	3.7262	1255	1.728090292	0.003991889	40.39869042	0.093320975
28.74863412	×ÔÉí³µÁ¾	Road 1	311.0984696	67.80901794	-0.000883741	0.56843102	0.223529413	0	328.0897	985.7637	649.842	0.7975	3.7263	1256	1.618391329	0.003738484	40.42554956	0.093383019
28.76530473	×ÔÉí³µÁ¾	Road 1	311.4126314	67.84291763	-0.000875336	0.568291783	0.223529413	0	328.4857	985.7725	649.8218	0.7959	3.7279	1257	2.019604171	0.004665286	40.45921759	0.093460793
28.78283234	×ÔÉí³µÁ¾	Road 1	311.7430608	67.86694336	-0.00086366	0.568861902	0.223529413	0	328.7688	985.7783	649.8074	0.7951	3.7286	1258	1.631654224	0.003769121	40.48781659	0.093526856
28.79871595	×ÔÉí³µÁ¾	Road 1	312.0425968	67.88944473	-0.0008488	0.568799019	0.223529413	0	329.033	985.7842	649.7939	0.794	3.7297	1259	1.659032949	0.003832366	40.51416803	0.093587728
28.81529712	×ÔÉí³µÁ¾	Road 1	312.3554499	67.92473831	-0.000832491	0.569359183	0.223529413	0	329.4485	985.793	649.7727	0.7927	3.7309	1260	2.077436711	0.004798879	40.54861435	0.093667299
28.83205314	×ÔÉí³µÁ¾	Road 1	312.6717074	67.94734955	-0.000815592	0.568621159	0.223529413	0	329.713	985.7988	649.7593	0.7917	3.731	1261	1.62073779	0.003743904	40.57577146	0.093730032
28.84869662	×ÔÉí³µÁ¾	Road 1	312.985945	67.96987152	-0.000796561	0.568981349	0.223529413	0	329.9775	985.8037	649.7457	0.7916	3.7311	1262	1.623384814	0.003750019	40.60279024	0.093792445
28.8653269	×ÔÉí³µÁ¾	Road 1	313.3000894	68.00362701	-0.000779378	0.569711328	0.223529413	0	330.3745	985.8125	649.7255	0.7899	3.7327	1263	2.021482039	0.004669624	40.63640806	0.093870103
28.88198468	×ÔÉí³µÁ¾	Road 1	313.6148577	68.02623825	-0.000760154	0.568555236	0.223529413	0	330.6393	985.8184	649.712	0.7889	3.7337	1264	1.62694902	0.003758252	40.66350941	0.093932707
28.89869524	×ÔÉí³µÁ¾	Road 1	313.9307275	68.04865723	-0.000740499	0.568715513	0.223529413	0	330.9042	985.8242	649.6985	0.7878	3.7347	1265	1.618101575	0.003737815	40.6905488	0.093995168
28.91528631	×ÔÉí³µÁ¾	Road 1	314.244502	68.08412933	-0.000724135	0.568796277	0.223529413	0	331.3206	985.833	649.6772	0.7865	3.736	1266	2.087189461	0.004821408	40.7251775	0.09407516
28.93196461	×ÔÉí³µÁ¾	Road 1	314.5600302	68.10653458	-0.00070656	0.568526983	0.223529413	0	331.5857	985.8389	649.6637	0.7855	3.737	1267	1.620265251	0.003742813	40.75220077	0.094137584
28.94863265	×ÔÉí³µÁ¾	Road 1	314.8754684	68.12904282	-0.000694285	0.569299817	0.223529413	0	331.8509	985.8438	649.6501	0.7854	3.7371	1268	1.624825558	0.003753347	40.77928343	0.094200145
28.96536961	×ÔÉí³µÁ¾	Road 1	315.1923752	68.16439133	-0.000680735	0.568339765	0.223529413	0	332.2678	985.8525	649.629	0.7842	3.7383	1269	2.073973535	0.004790879	40.81399543	0.094280329
28.98201676	×ÔÉí³µÁ¾	Road 1	315.5076855	68.1868927	-0.000668762	0.569099903	0.223529413	0	332.5332	985.8584	649.6154	0.7831	3.7393	1270	1.626706194	0.003757691	40.84107545	0.094342884
28.99871302	×ÔÉí³µÁ¾	Road 1	315.8240306	68.20939407	-0.00066248	0.568633676	0.223529413	0	332.7987	985.8643	649.6019	0.7821	3.7404	1271	1.62480046	0.003753289	40.86820355	0.09440555
29.01537776	×ÔÉí³µÁ¾	Road 1	316.1399426	68.24487305	-0.000657622	0.56844151	0.223529413	0	333.2161	985.873	649.5806	0.7809	3.7416	1272	2.086079183	0.004818843	40.90296752	0.094485855
29.03201465	×ÔÉí³µÁ¾	Road 1	316.4554296	68.26719589	-0.000652098	0.568871498	0.23137255	0	333.4818	985.8789	649.567	0.7799	3.7426	1273	1.622431942	0.003747818	40.92995974	0.094548207
29.0486475	×ÔÉí³µÁ¾	Road 1	316.7709964	68.30098572	-0.000648662	0.570500195	0.239215687	0	333.8806	985.8877	649.5467	0.7783	3.7441	1274	2.03004382	0.004689401	40.96372515	0.094626205
29.06529501	×ÔÉí³µÁ¾	Road 1	317.0869464	68.32373428	-0.000647976	0.57217145	0.239215687	0	334.1465	985.8936	649.5331	0.7773	3.7452	1275	1.638115888	0.003784048	40.99099571	0.0946892
29.08402567	×ÔÉí³µÁ¾	Road 1	317.4426098	68.3578949	-0.000645922	0.577275932	0.247058824	0	334.5456	985.9014	649.5128	0.7767	3.7457	1276	1.908797077	0.004409321	41.02674873	0.09477179
29.0997227	×ÔÉí³µÁ¾	Road 1	317.74077	68.38087006	-0.000643871	0.579364002	0.254901975	0	334.8118	985.9072	649.4992	0.7757	3.7468	1277	1.696651048	0.003919264	41.05338111	0.09483331
29.11534862	×ÔÉí³µÁ¾	Road 1	318.0376798	68.40396881	-0.000640464	0.58190161	0.254901975	0	335.0781	985.9131	649.4856	0.7747	3.7478	1278	1.705734023	0.003940246	41.08003478	0.09489488
29.13203023	×ÔÉí³µÁ¾	Road 1	318.3547564	68.42721863	-0.000637069	0.584898472	0.262745112	0	335.3444	985.9189	649.472	0.7737	3.7478	1279	1.656254664	0.003825948	41.10766377	0.094958703
29.14868324	×ÔÉí³µÁ¾	Road 1	318.6714604	68.46417389	-0.000630988	0.591031671	0.262745112	0	335.7631	985.9277	649.4507	0.7725	3.749	1280	2.14513007	0.00495525	41.14338664	0.095041223
29.16534798	×ÔÉí³µÁ¾	Road 1	318.9884972	68.48785629	-0.000623608	0.593559265	0.270588249	0	336.0297	985.9336	649.4371	0.7715	3.7501	1281	1.67364979	0.003866131	41.17127759	0.095105651
29.18195334	×ÔÉí³µÁ¾	Road 1	319.3045141	68.51166229	-0.000615623	0.596116841	0.270588249	0	336.2964	985.9395	649.4235	0.7704	3.7511	1282	1.681541106	0.00388436	41.19920018	0.095170152
29.19864484	×ÔÉí³µÁ¾	Road 1	319.6223453	68.54937973	-0.000608363	0.601162672	0.270588249	0	336.7156	985.9482	649.4021	0.7693	3.7523	1283	2.171432168	0.005016008	41.23544464	0.095253877
29.21540965	×ÔÉí³µÁ¾	Road 1	319.941685	68.57356339	-0.000604428	0.603289962	0.278431386	0	336.9825	985.9541	649.3885	0.7683	3.7534	1284	1.688055237	0.003899408	41.26374457	0.09531925
29.23202711	×ÔÉí³µÁ¾	Road 1	320.2583536	68.60298615	-0.000599858	0.605637789	0.278431386	0	337.2496	985.96	649.3749	0.7673	3.7544	1285	1.883077128	0.004349908	41.29503652	0.095391534
29.2486354	×ÔÉí³µÁ¾	Road 1	320.574993	68.63449631	-0.000599207	0.610704184	0.286274523	0	337.6503	985.9688	649.3545	0.7657	3.7559	1286	1.958898723	0.004525056	41.32757049	0.095466688
29.2653247	×ÔÉí³µÁ¾	Road 1	320.8932915	68.65923615	-0.000597257	0.613429666	0.294117659	0	337.9175	985.9746	649.3408	0.7647	3.757	1287	1.713428351	0.003958019	41.35616641	0.095532744
29.28203857	×ÔÉí³µÁ¾	Road 1	321.2122316	68.6965416	-0.000597257	0.620023608	0.294117659	0	338.3185	985.9834	649.3204	0.7632	3.7585	1288	2.159030622	0.004987361	41.39225215	0.095616102
29.29860067	×ÔÉí³µÁ¾	Road 1	321.5283916	68.72169342	-0.000597257	0.622989416	0.301960796	0	338.5861	985.9893	649.3067	0.7622	3.7595	1289	1.736242029	0.004010719	41.42100797	0.095682528
29.31527384	×ÔÉí³µÁ¾	Road 1	321.8467895	68.74710617	-0.000597257	0.626977503	0.309803933	0	338.8536	985.9951	649.2931	0.7612	3.7606	1290	1.740058201	0.004019534	41.45002026	0.095749547
29.33205735	×ÔÉí³µÁ¾	Road 1	322.1674732	68.78545532	-0.000597257	0.633370996	0.309803933	0	339.2552	986.0039	649.2726	0.7597	3.7621	1291	2.192878694	0.00506555	41.48682446	0.095834564
29.3492503	×ÔÉí³µÁ¾	Road 1	322.4961032	68.81123886	-0.000597257	0.637844503	0.309803933	0	339.523	986.0098	649.2589	0.7587	3.7631	1292	1.726825416	0.003988967	41.51651368	0.095903147
29.36537364	×ÔÉí³µÁ¾	Road 1	322.8044635	68.85031586	-0.000597257	0.641171396	0.309803933	0	339.925	986.0176	649.2384	0.7582	3.7637	1293	2.277159254	0.005260238	41.55322909	0.095987959
29.38202812	×ÔÉí³µÁ¾	Road 1	323.1231029	68.87647018	-0.000597257	0.642810702	0.31764707	0	340.1931	986.0234	649.2248	0.7572	3.7647	1294	1.770280432	0.004089348	41.58271219	0.096056065
29.39868186	×ÔÉí³µÁ¾	Road 1	323.4418501	68.90281677	-0.000597257	0.644679487	0.325490206	0	340.4613	986.0293	649.2111	0.7563	3.7657	1295	1.777755751	0.004106616	41.61231848	0.096124456
29.41531398	×ÔÉí³µÁ¾	Road 1	323.7603756	68.94443436	-0.000597257	0.65383023	0.333333343	0	340.8829	986.0391	649.1896	0.7542	3.7678	1296	2.326660515	0.005374586	41.65101577	0.096213846
29.43199779	×ÔÉí³µÁ¾	Road 1	324.080016	68.97140579	-0.000597257	0.658245206	0.34117648	0	341.1514	986.0449	649.1759	0.7532	3.7688	1297	1.799843242	0.004157638	41.681044	0.096283212
29.4486574	×ÔÉí³µÁ¾	Road 1	324.399318	68.99845276	-0.000597257	0.660783827	0.34117648	0	341.42	986.0508	649.1622	0.7512	3.7699	1298	1.804533407	0.004168472	41.71110683	0.096352657
29.46530894	×ÔÉí³µÁ¾	Road 1	324.7186538	69.03915024	-0.000597257	0.663860679	0.349019617	0	341.823	986.0596	649.1416	0.7497	3.7714	1299	2.294755835	0.005300886	41.74931806	0.096440925
29.48195096	×ÔÉí³µÁ¾	Road 1	325.0379331	69.0664856	-0.000597257	0.6668486	0.349019617	0	342.0918	986.0654	649.1279	0.7488	3.7724	1300	1.817380528	0.004198149	41.77956294	0.09651079
29.49858088	×ÔÉí³µÁ¾	Road 1	325.357117	69.09608002	-0.000597257	0.672074199	0.356862754	0	342.38	986.0713	649.1133	0.7481	3.773	1301	1.899826337	0.004388599	41.8111569	0.096583772
29.51535559	×ÔÉí³µÁ¾	Road 1	325.6792001	69.12184982	-0.000597257	0.6754601	0.36470589	0	342.6298	986.0771	649.1005	0.7468	3.7744	1302	1.755109078	0.004054302	41.84059834	0.096651782
29.53192906	×ÔÉí³µÁ¾	Road 1	325.9975751	69.15570145	-0.000597257	0.679864824	0.36470589	0	342.9566	986.084	649.0838	0.7458	3.7743	1303	2.058273656	0.004754612	41.87471108	0.096730583
29.55029865	×ÔÉí³µÁ¾	Road 1	326.35069	69.20205002	-0.000597257	0.685750008	0.36470589	0	343.3991	986.0938	649.0613	0.7441	3.7761	1304	2.346661695	0.005420789	41.9178183	0.09683016
29.5658531	×ÔÉí³µÁ¾	Road 1	326.649813	69.23055954	-0.000597257	0.688475132	0.36470589	0	343.6685	986.0996	649.0475	0.7431	3.7771	1305	1.934829234	0.004469456	41.94791349	0.09689968
29.58219637	×ÔÉí³µÁ¾	Road 1	326.9642443	69.2610878	-0.000597257	0.691182435	0.36470589	0	343.9574	986.1055	649.0328	0.7425	3.7777	1306	1.956511559	0.004519542	41.97988929	0.096973544
29.59863824	×ÔÉí³µÁ¾	Road 1	327.2807225	69.29388885	-0.000597257	0.693211436	0.36470589	0	344.2656	986.1123	649.0171	0.7412	3.779	1307	2.033329954	0.004696992	42.01332105	0.097050772
29.6153576	×ÔÉí³µÁ¾	Road 1	327.6027525	69.33926239	-0.000597257	0.696669042	0.36470589	0	344.6897	986.1221	648.9955	0.7391	3.7811	1308	2.464978072	0.005694099	42.05453391	0.097145973
29.63214184	×ÔÉí³µÁ¾	Road 1	327.9261669	69.36814957	-0.000597257	0.698557198	0.36470589	0	344.9597	986.1279	648.9817	0.7382	3.7821	1309	1.871070163	0.004322172	42.0859384	0.097218518
29.64859618	×ÔÉí³µÁ¾	Road 1	328.2434235	69.41172409	-0.000599207	0.700974524	0.36470589	0	345.3649	986.1367	648.9611	0.7367	3.7835	1310	2.42791001	0.005608472	42.12588805	0.097310801
29.66529501	×ÔÉí³µÁ¾	Road 1	328.5655298	69.44094086	-0.000601814	0.70194459	0.36470589	0	345.6352	986.1426	648.9473	0.7357	3.7845	1311	1.889839957	0.00436553	42.15744617	0.097383701
29.68212214	×ÔÉí³µÁ¾	Road 1	328.8902472	69.47012329	-0.000605083	0.702704012	0.36470589	0	345.9055	986.1484	648.9335	0.7348	3.7854	1312	1.881276884	0.00434575	42.18910266	0.097456827
29.69869011	×ÔÉí³µÁ¾	Road 1	329.2101752	69.51610794	-0.000610338	0.704263628	0.36470589	0	346.3307	986.1582	648.9118	0.7327	3.7874	1313	2.507537863	0.005792412	42.23064747	0.097552796
29.71528557	×ÔÉí³µÁ¾	Road 1	329.5307692	69.54541397	-0.000617613	0.705032527	0.36470589	0	346.6014	986.1641	648.898	0.7317	3.7883	1314	1.902011966	0.004393648	42.26221224	0.09762571
29.73197304	×ÔÉí³µÁ¾	Road 1	329.8532766	69.57474747	-0.000630988	0.706211448	0.36470589	0	346.8722	986.1699	648.8842	0.7308	3.7893	1315	1.897824159	0.004383974	42.29388212	0.097698868
29.74866418	×ÔÉí³µÁ¾	Road 1	330.1760685	69.62084885	-0.000643871	0.706729889	0.36470589	0	347.2979	986.1787	648.8624	0.7297	3.7903	1316	2.502751597	0.005781356	42.33565589	0.097795365
29.76529336	×ÔÉí³µÁ¾	Road 1	330.4977991	69.6504364	-0.00066248	0.7070207	0.36470589	0	347.569	986.1855	648.8486	0.7278	3.7922	1317	1.912462313	0.004417788	42.36745858	0.097868829
29.78201639	×ÔÉí³µÁ¾	Road 1	330.8214815	69.67979736	-0.000686418	0.708009124	0.36470589	0	347.8402	986.1914	648.8348	0.7268	3.7931	1318	1.898975527	0.004386633	42.39921519	0.097942187
29.79861918	×ÔÉí³µÁ¾	Road 1	331.1430404	69.72390747	-0.000711656	0.708524525	0.36470589	0	348.2473	986.2002	648.8141	0.7254	3.7945	1319	2.442644465	0.005642509	42.43976992	0.098035869
29.81529346	×ÔÉí³µÁ¾	Road 1	331.4661205	69.75348129	-0.000733775	0.709034383	0.36470589	0	348.5188	986.2061	648.8002	0.7244	3.7954	1320	1.911452456	0.004415455	42.471642	0.098109493
29.83201465	×ÔÉí³µÁ¾	Road 1	331.7902468	69.78297958	-0.000760917	0.708946824	0.36470589	0	348.7904	986.2119	648.7864	0.7235	3.7963	1321	1.90641045	0.004403808	42.50351945	0.09818313
29.84860828	×ÔÉí³µÁ¾	Road 1	332.1121137	69.82926636	-0.000784039	0.709056556	0.36470589	0	349.2174	986.2217	648.7645	0.7214	3.7982	1322	2.525875966	0.005834773	42.5454329	0.09827995
29.86526606	×ÔÉí³µÁ¾	Road 1	332.435362	69.85887451	-0.000802871	0.709127307	0.36470589	0	349.4893	986.2275	648.7507	0.7205	3.7991	1323	1.916191444	0.004426402	42.57735239	0.098353684
29.88195279	×ÔÉí³µÁ¾	Road 1	332.7593187	69.89048767	-0.000818793	0.709017932	0.36470589	0	349.7808	986.2344	648.7358	0.7189	3.8007	1324	1.987601502	0.004591359	42.61051897	0.098430299
29.89856512	×ÔÉí³µÁ¾	Road 1	333.0819669	69.92000656	-0.000826026	0.709765196	0.36470589	0	350.0529	986.2402	648.722	0.718	3.8015	1325	1.917298456	0.004428959	42.64236976	0.098503874
29.91525698	×ÔÉí³µÁ¾	Road 1	333.4063851	69.9685318	-0.000829254	0.710042536	0.372549027	0	350.5003	986.25	648.6992	0.7163	3.8032	1326	2.601426848	0.006009296	42.68579243	0.098604181
29.93210244	×ÔÉí³µÁ¾	Road 1	333.7339366	70.00020676	-0.000829254	0.710395813	0.372549027	0	350.7922	986.2568	648.6843	0.7148	3.8037	1327	1.981673625	0.004577666	42.71917462	0.098681293
29.94882839	×ÔÉí³µÁ¾	Road 1	334.0593022	70.02983551	-0.000831681	0.711981356	0.380392164	0	351.0648	986.2627	648.6704	0.7139	3.8046	1328	1.916508327	0.004427134	42.75123006	0.098755341
29.96525634	×ÔÉí³µÁ¾	Road 1	334.3790839	70.07657547	-0.000831681	0.715688765	0.388235301	0	351.4933	986.2715	648.6486	0.7129	3.8055	1329	2.567487855	0.005930897	42.79340861	0.098852774
29.98194711	×ÔÉí³µÁ¾	Road 1	334.7041302	70.10861435	-0.000827639	0.718615115	0.396078438	0	351.7857	986.2783	648.6336	0.7114	3.807	1330	2.008038728	0.004638569	42.82692432	0.098930195
29.99860855	×ÔÉí³µÁ¾	Road 1	335.0287442	70.13861389	-0.000827639	0.72258234	0.403921574	0	352.0587	986.2842	648.6198	0.7105	3.8079	1331	1.936659652	0.004473684	42.85919187	0.099004733
30.01528026	×ÔÉí³µÁ¾	Road 1	335.3537691	70.18414536	-0.000827639	0.727787256	0.411764711	0	352.4684	986.2939	648.5988	0.7083	3.8102	1332	2.501809408	0.00577918	42.9009013	0.099101082
30.0319505	×ÔÉí³µÁ¾	Road 1	335.678907	70.21473541	-0.000827639	0.733242869	0.419607848	0	352.7417	986.2998	648.5849	0.7074	3.8112	1333	1.959345105	0.004526087	42.93356405	0.099176533
30.04860351	×ÔÉí³µÁ¾	Road 1	336.003851	70.24544907	-0.000827639	0.737247109	0.419607848	0	353.0151	986.3057	648.5709	0.7065	3.8121	1334	1.965726769	0.004540829	42.96629933	0.099252151
30.06529978	×ÔÉí³µÁ¾	Road 1	336.3298556	70.29216156	-0.000827639	0.743711889	0.427450985	0	353.4254	986.3145	648.55	0.7052	3.8135	1335	2.545700808	0.005880569	43.00880302	0.099350335
30.0820272	×ÔÉí³µÁ¾	Road 1	336.6566143	70.32352066	-0.000827639	0.747877896	0.427450985	0	353.6992	986.3213	648.5361	0.7034	3.8153	1336	1.986033119	0.004587737	43.04202424	0.099427076
30.09857941	×ÔÉí³µÁ¾	Road 1	336.9800951	70.35500336	-0.000827639	0.751873076	0.427450985	0	353.973	986.3271	648.5221	0.7025	3.8163	1337	2.003389108	0.004627829	43.07518476	0.099503677
30.11531637	×ÔÉí³µÁ¾	Road 1	337.3073449	70.38910904	-0.000827639	0.755360842	0.427450985	0	354.2665	986.334	648.5071	0.701	3.8178	1338	2.086734145	0.004820356	43.11011033	0.099584355
30.13191329	×ÔÉí³µÁ¾	Road 1	337.6320356	70.42787704	-0.000827639	0.759456098	0.427450985	0	354.5993	986.3408	648.4902	0.7002	3.8186	1339	2.269065916	0.005241542	43.14776986	0.099671348
30.14856887	×ÔÉí³µÁ¾	Road 1	337.9580534	70.46672745	-0.000827639	0.761314571	0.427450985	0	354.9324	986.3486	648.4731	0.6985	3.8204	1340	2.268155807	0.00523944	43.1855473	0.099758614
30.16523178	×ÔÉí³µÁ¾	Road 1	338.2844602	70.51977768	-0.000827639	0.765172184	0.427450985	0	355.3832	986.3584	648.4502	0.697	3.822	1341	2.788019488	0.006440325	43.23200382	0.099865929
30.18201712	×ÔÉí³µÁ¾	Road 1	338.6134158	70.55205002	-0.000827639	0.767011821	0.427450985	0	355.6578	986.3652	648.4362	0.6951	3.8239	1342	2.020727441	0.00466788	43.26592242	0.099944281
30.19857886	×ÔÉí³µÁ¾	Road 1	338.938139	70.58458328	-0.000827639	0.768791378	0.427450985	0	355.9326	986.3711	648.4222	0.6943	3.8247	1343	2.046957106	0.004728471	43.29982359	0.100022592
30.21523187	×ÔÉí³µÁ¾	Road 1	339.2648882	70.63569031	-0.000826026	0.770330489	0.435294122	0	356.3645	986.3809	648.4001	0.6924	3.8267	1344	2.722087232	0.006288022	43.34515454	0.100127307
30.23200842	×ÔÉí³µÁ¾	Road 1	339.5942132	70.66832657	-0.000826026	0.77319479	0.435294122	0	356.6396	986.3867	648.3861	0.6916	3.8276	1345	2.03742111	0.004706443	43.37933542	0.100206265
30.24860425	×ÔÉí³µÁ¾	Road 1	339.9202176	70.71750412	-0.000826026	0.776020467	0.435294122	0	357.0524	986.3965	648.3651	0.6893	3.8299	1346	2.660351261	0.006145411	43.42348616	0.100308253
30.26527815	×ÔÉí³µÁ¾	Road 1	340.2479189	70.7527565	-0.000826026	0.777614951	0.435294122	0	357.3474	986.4023	648.35	0.6889	3.8304	1347	2.142706135	0.004949651	43.45921344	0.100390783
30.28205579	×ÔÉí³µÁ¾	Road 1	340.5778126	70.78572235	-0.00082522	0.778348923	0.435294122	0	357.6229	986.4092	648.3361	0.687	3.8313	1348	2.052241412	0.004740678	43.49364521	0.10047032
30.29861423	×ÔÉí³µÁ¾	Road 1	340.9035481	70.81872253	-0.00082522	0.7795313	0.435294122	0	357.8986	986.415	648.322	0.6862	3.8321	1349	2.070242123	0.004782259	43.52792519	0.100549507
30.31522436	×ÔÉí³µÁ¾	Road 1	341.2305397	70.87060547	-0.00082522	0.781708658	0.435294122	0	358.3319	986.4248	648.2999	0.6842	3.834	1350	2.763585228	0.006383882	43.57382869	0.100655544
30.3327879	×ÔÉí³µÁ¾	Road 1	341.5764509	70.90146332	-0.00082522	0.781829894	0.435294122	0	358.5882	986.4307	648.2868	0.683	3.8353	1351	1.927740982	0.004453082	43.60768664	0.100733756
30.34863632	×ÔÉí³µÁ¾	Road 1	341.8887397	70.93699722	-0.00082522	0.782956362	0.435294122	0	358.884	986.4375	648.2717	0.6816	3.8367	1352	2.225881602	0.005141787	43.64296335	0.100815245
30.36521859	×ÔÉí³µÁ¾	Road 1	342.2157285	70.98907928	-0.00082522	0.783858955	0.435294122	0	359.3181	986.4473	648.2496	0.6797	3.8387	1353	2.77828453	0.006417837	43.68903361	0.100921668
30.38189286	×ÔÉí³µÁ¾	Road 1	342.544686	71.02239532	-0.00082522	0.784796774	0.435294122	0	359.5946	986.4531	648.2355	0.6788	3.8395	1354	2.078459835	0.004801242	43.72369041	0.101001725
30.39855174	×ÔÉí³µÁ¾	Road 1	342.8734935	71.05563583	-0.00082522	0.783855021	0.435294122	0	359.8711	986.46	648.2214	0.677	3.8413	1355	2.077643105	0.004799356	43.75830161	0.101081677
30.41527623	×ÔÉí³µÁ¾	Road 1	343.203839	71.10791702	-0.00082522	0.784933269	0.435294122	0	360.306	986.4697	648.1993	0.6751	3.8432	1356	2.773338413	0.006406412	43.80468429	0.101188821
30.431956	×ÔÉí³µÁ¾	Road 1	343.5334663	71.14356766	-0.00082522	0.784807622	0.435294122	0	360.6026	986.4766	648.1841	0.6736	3.8447	1357	2.167101825	0.005006005	43.84083105	0.10127232
30.44854156	×ÔÉí³µÁ¾	Road 1	343.8613962	71.17922516	-0.00082522	0.785141945	0.435294122	0	360.8994	986.4824	648.1689	0.6732	3.8452	1358	2.175758156	0.005026001	43.87691723	0.101355679
30.46521804	×ÔÉí³µÁ¾	Road 1	344.191344	71.22680969	-0.00082522	0.785663009	0.435294122	0	361.2954	986.4922	648.1488	0.6705	3.8478	1359	2.609778264	0.006028588	43.92043912	0.101456214
30.48190551	×ÔÉí³µÁ¾	Road 1	344.5216747	71.26249466	-0.00082522	0.785676003	0.435294122	0	361.5926	986.499	648.1336	0.6691	3.8492	1360	2.170882874	0.005014739	43.95666566	0.101539898
30.49858968	×ÔÉí³µÁ¾	Road 1	344.8521051	71.29809036	-0.00082522	0.785827875	0.435294122	0	361.8899	986.5049	648.1185	0.6686	3.8497	1361	2.168783094	0.005009889	43.99285001	0.101623484
30.51522399	×ÔÉí³µÁ¾	Road 1	345.1817795	71.34815369	-0.00082522	0.78581202	0.435294122	0	362.3064	986.5146	648.0972	0.6663	3.8519	1362	2.709990447	0.006260078	44.03792885	0.101727616
30.53203939	×ÔÉí³µÁ¾	Road 1	345.5152094	71.38383865	-0.00082522	0.785258234	0.419607848	0	362.6041	986.5215	648.082	0.6649	3.8533	1363	2.1640355	0.004998922	44.07431797	0.101811675
30.54860883	×ÔÉí³µÁ¾	Road 1	345.8439155	71.41714783	-0.00082522	0.783208549	0.419607848	0	362.882	986.5283	648.0679	0.6631	3.8551	1364	2.095891166	0.004841509	44.10904571	0.101891896
30.56531866	×ÔÉí³µÁ¾	Road 1	346.17556	71.45017548	-0.00082522	0.780346751	0.419607848	0	363.1602	986.5342	648.0537	0.6622	3.8559	1365	2.075897109	0.004795322	44.14373359	0.101972025
30.5819867	×ÔÉí³µÁ¾	Road 1	346.5066257	71.50429688	-0.00082522	0.776736557	0.411764711	0	363.6173	986.5449	648.0304	0.6598	3.8584	1366	2.861841044	0.006610853	44.19143488	0.102082215
30.59856127	×ÔÉí³µÁ¾	Road 1	346.835986	71.53711853	-0.00082522	0.774923861	0.411764711	0	363.8957	986.5508	648.0162	0.6589	3.8592	1367	2.080348041	0.004805604	44.22591575	0.102161865
30.61521355	×ÔÉí³µÁ¾	Road 1	347.1670418	71.56983032	-0.00082522	0.773111343	0.411764711	0	364.1743	986.5576	648.002	0.6571	3.86	1368	2.071369241	0.004784863	44.26040877	0.102241544
30.63195307	×ÔÉí³µÁ¾	Road 1	347.4999943	71.60475311	-0.00082522	0.770429611	0.403921574	0	364.4729	986.5645	647.9868	0.6557	3.8614	1369	2.147594919	0.004960944	44.29635848	0.102324588
30.64860938	×ÔÉí³µÁ¾	Road 1	347.831549	71.66034393	-0.00082522	0.766402245	0.403921574	0	364.9509	986.5752	647.9624	0.6536	3.8635	1370	2.923440798	0.006753148	44.34505222	0.102437071
30.66527082	×ÔÉí³µÁ¾	Road 1	348.1633556	71.69267807	-0.00082522	0.764325023	0.403921574	0	365.2299	986.5811	647.9482	0.6528	3.8643	1371	2.059704007	0.004757916	44.37936986	0.102516344
30.68206716	×ÔÉí³µÁ¾	Road 1	348.4979977	71.72466202	-0.00082522	0.761695743	0.403921574	0	365.5091	986.5879	647.934	0.651	3.866	1372	2.037913362	0.00470758	44.41359933	0.102595414
30.6986333	×ÔÉí³µÁ¾	Road 1	348.8282223	71.76136322	-0.00082522	0.760052919	0.396078438	0	365.8283	986.5947	647.9177	0.6499	3.8671	1373	2.231716577	0.005155265	44.45057026	0.102680817
30.7152152	×ÔÉí³µÁ¾	Road 1	349.1589922	71.81152267	-0.00082522	0.75738138	0.396078438	0	366.2675	986.6055	647.8953	0.6471	3.8698	1374	2.735143747	0.006318182	44.49592414	0.102785585
30.73195545	×ÔÉí³µÁ¾	Road 1	349.4930789	71.84552536	-0.00082522	0.753351331	0.396078438	0	366.5671	986.6123	647.88	0.6457	3.8712	1375	2.119641991	0.004896373	44.53140748	0.102867551
30.74860773	×ÔÉí³µÁ¾	Road 1	349.8255457	71.87487946	-0.00082522	0.75112325	0.396078438	0	366.8268	986.6182	647.8668	0.6445	3.8724	1376	1.953730253	0.004513117	44.56394155	0.102942705
30.76531499	×ÔÉí³µÁ¾	Road 1	350.1593401	71.92440033	-0.00082522	0.749664009	0.388235301	0	367.2667	986.6279	647.8444	0.6427	3.8741	1377	2.701128314	0.006239606	44.60907001	0.103046952
30.78197314	×ÔÉí³µÁ¾	Road 1	350.4922985	71.95579376	-0.00082522	0.746989906	0.388235301	0	367.5468	986.6348	647.8301	0.6409	3.8759	1378	2.031301669	0.004692307	44.64290772	0.103125117
30.79856347	×ÔÉí³µÁ¾	Road 1	350.824045	71.98696747	-0.00082522	0.744520247	0.380392164	0	367.8269	986.6406	647.8158	0.6401	3.8767	1379	2.028607212	0.004686083	44.67656299	0.103202861
30.81524104	×ÔÉí³µÁ¾	Road 1	351.1576908	72.02037277	-0.00082522	0.74034524	0.380392164	0	368.1273	986.6475	647.8005	0.6387	3.878	1380	2.106537864	0.004866102	44.71169493	0.103284015
30.83200255	×ÔÉí³µÁ¾	Road 1	351.4931908	72.05791855	-0.00082522	0.737209976	0.380392164	0	368.4678	986.6553	647.7831	0.6371	3.8797	1381	2.254985559	0.005209017	44.7494919	0.103371326
30.84861378	×ÔÉí³µÁ¾	Road 1	351.8259257	72.11063232	-0.00082522	0.7340433	0.380392164	0	368.9489	986.667	647.7586	0.634	3.8826	1382	2.837720958	0.006555135	44.79662992	0.103480215
30.86524626	×ÔÉí³µÁ¾	Road 1	352.1592282	72.14127731	-0.00082522	0.732625306	0.380392164	0	369.2296	986.6729	647.7443	0.6332	3.8834	1383	2.009535142	0.004642026	44.83005348	0.103557424
30.88190661	×ÔÉí³µÁ¾	Road 1	352.4932306	72.17191544	-0.00082522	0.730168223	0.380392164	0	369.5106	986.6797	647.73	0.6315	3.8851	1384	2.008083179	0.004638672	44.86350884	0.103634705
30.89858711	×ÔÉí³µÁ¾	Road 1	352.8278384	72.21531143	-0.00082522	0.728560567	0.372549027	0	369.7916	986.6865	647.7156	0.6297	3.8869	1385	2.484800849	0.00573989	44.90495657	0.10373045
30.91522619	×ÔÉí³µÁ¾	Road 1	353.1617654	72.24781036	-0.00082522	0.726252735	0.36470589	0	370.2133	986.6963	647.6941	0.6276	3.889	1386	2.081140772	0.004807435	44.93958484	0.103810441
30.9321248	×ÔÉí³µÁ¾	Road 1	353.5010423	72.2779747	-0.00082522	0.72188139	0.356862754	0	370.4946	986.7021	647.6798	0.6268	3.8897	1387	1.976896141	0.00456663	44.97299163	0.103887611
30.94862019	×ÔÉí³µÁ¾	Road 1	353.832449	72.32709732	-0.00082522	0.715685964	0.356862754	0	370.9571	986.7129	647.6562	0.6235	3.8911	1388	2.723282813	0.006290783	45.01791325	0.10399138
30.96522335	×ÔÉí³µÁ¾	Road 1	354.1661579	72.35683594	-0.000827639	0.712762237	0.349019617	0	371.2387	986.7197	647.6419	0.6218	3.8928	1389	1.982556984	0.004579707	45.05082996	0.104067417
30.98193208	×ÔÉí³µÁ¾	Road 1	354.5021253	72.38626556	-0.000827639	0.709466219	0.349019617	0	371.5204	986.7266	647.6275	0.6201	3.8945	1390	1.964599995	0.004538226	45.08365593	0.104143245
30.99857923	×ÔÉí³µÁ¾	Road 1	354.8370484	72.42822647	-0.000827639	0.705951273	0.349019617	0	371.8023	986.7324	647.6132	0.6194	3.8952	1391	2.440579025	0.005637738	45.12428461	0.104237097
31.01526706	×ÔÉí³µÁ¾	Road 1	355.1729348	72.45942078	-0.000827639	0.70165658	0.349019617	0	372.2253	986.7422	647.5916	0.6173	3.8973	1392	2.033853052	0.004698201	45.15822522	0.1043155
31.03188562	×ÔÉí³µÁ¾	Road 1	355.5076275	72.50290604	-0.000827639	0.697862148	0.34117648	0	372.6485	986.752	647.5701	0.6152	3.8994	1393	2.502941702	0.005781795	45.19982049	0.104411585
31.04855073	×ÔÉí³µÁ¾	Road 1	355.8433901	72.53150482	-0.000827639	0.696089506	0.34117648	0	372.9308	986.7588	647.5556	0.6135	3.9011	1394	1.939592079	0.004480458	45.23214401	0.104486253
31.06527412	×ÔÉí³µÁ¾	Road 1	356.1804695	72.56219101	-0.000827639	0.692104518	0.34117648	0	373.2334	986.7656	647.5402	0.6122	3.9024	1395	2.014775997	0.004654133	45.26583789	0.104564086
31.08199238	×ÔÉí³µÁ¾	Road 1	356.5175867	72.59260254	-0.000827639	0.690060019	0.34117648	0	373.5361	986.7734	647.5248	0.6099	3.9048	1396	2.00554599	0.004632811	45.29936713	0.104641538
31.0986025	×ÔÉí³µÁ¾	Road 1	356.8527014	72.63117828	-0.000827639	0.68801254	0.34117648	0	373.8188	986.7793	647.5104	0.6092	3.9055	1397	2.322253482	0.005364406	45.33794005	0.104730642
31.11519797	×ÔÉí³µÁ¾	Road 1	357.1876696	72.66355362	-0.000827639	0.685036421	0.34117648	0	374.243	986.7891	647.4888	0.6071	3.9076	1398	2.089940157	0.004827762	45.37262358	0.10481076
31.13189423	×ÔÉí³µÁ¾	Road 1	357.5248677	72.70567932	-0.000827639	0.682996392	0.34117648	0	374.6674	986.7988	647.4671	0.6051	3.9097	1399	2.45032093	0.005660241	45.41353479	0.104905265
31.1485784	×ÔÉí³µÁ¾	Road 1	357.8619516	72.73372192	-0.000827639	0.681989908	0.34117648	0	374.9505	986.8057	647.4526	0.6034	3.9114	1400	1.921986152	0.004439788	45.44560153	0.10497934
31.1652809	×ÔÉí³µÁ¾	Road 1	358.1995449	72.76372147	-0.000827639	0.680622697	0.34117648	0	375.2539	986.8135	647.4372	0.6011	3.9137	1401	1.995141953	0.004608778	45.47892538	0.105056318
31.18197643	×ÔÉí³µÁ¾	Road 1	358.5371268	72.79163361	-0.000827639	0.679254651	0.34117648	0	375.5373	986.8193	647.4227	0.6004	3.9144	1402	1.917644517	0.004429759	45.51094148	0.105130275
31.19854844	×ÔÉí³µÁ¾	Road 1	358.8723673	72.82558136	-0.000827639	0.678423285	0.34117648	0	375.8814	986.8281	647.4052	0.5979	3.917	1403	2.155358435	0.004978878	45.54666009	0.105212785
31.21521904	×ÔÉí³µÁ¾	Road 1	359.2097401	72.85529251	-0.000827639	0.676878273	0.34117648	0	376.1852	986.835	647.3897	0.5966	3.9184	1404	1.988550923	0.004593553	45.57981044	0.105289362
31.23192374	×ÔÉí³µÁ¾	Road 1	359.5479592	72.88899994	-0.000827639	0.676709116	0.34117648	0	376.5297	986.8428	647.3722	0.595	3.9199	1405	2.137668773	0.004938015	45.61551955	0.10537185
31.24858262	×ÔÉí³µÁ¾	Road 1	359.8853976	72.92078476	-0.000827639	0.675527751	0.34117648	0	376.8541	986.8506	647.3557	0.5931	3.9219	1406	2.069270324	0.004780014	45.64999127	0.10545148
31.26519018	×ÔÉí³µÁ¾	Road 1	360.2219516	72.95438232	-0.000827639	0.674551606	0.34117648	0	377.1989	986.8584	647.338	0.5916	3.9235	1407	2.142587945	0.004949378	45.68557443	0.105533677
31.28197955	×ÔÉí³µÁ¾	Road 1	360.562383	72.99578018	-0.00082522	0.673773825	0.34117648	0	377.625	986.8682	647.3163	0.5895	3.9246	1408	2.422747275	0.005596546	45.72625083	0.105627639
31.29852736	×ÔÉí³µÁ¾	Road 1	360.8980523	73.02534027	-0.000822806	0.673265755	0.34117648	0	377.9295	986.876	647.3008	0.5873	3.9269	1409	1.995078615	0.004608632	45.75926501	0.105703902
31.3151976	×ÔÉí³µÁ¾	Road 1	361.2363967	73.06671066	-0.000822002	0.672236681	0.34117648	0	378.356	986.8857	647.2791	0.5853	3.9289	1410	2.434893955	0.005624605	45.79985528	0.105797666
31.33197451	×ÔÉí³µÁ¾	Road 1	361.5770342	73.09422455	-0.000816391	0.671288192	0.34117648	0	378.6406	986.8926	647.2645	0.5836	3.9306	1411	1.904259176	0.004398839	45.83180286	0.105871465
31.34860699	×ÔÉí³µÁ¾	Road 1	361.9149298	73.13543701	-0.00081001	0.671099126	0.34117648	0	379.0675	986.9023	647.2428	0.5816	3.9327	1412	2.434464031	0.005623612	45.87229405	0.105964999
31.36520502	×ÔÉí³µÁ¾	Road 1	362.2521887	73.14916306	-0.000802871	0.670649767	0.34117648	0	379.2099	986.9053	647.2355	0.5812	3.933	1413	1.391659589	0.003214734	45.89539286	0.106018358
31.38189652	×ÔÉí³µÁ¾	Road 1	362.5915381	73.19041672	-0.000796561	0.66983825	0.34117648	0	379.6371	986.916	647.2138	0.5783	3.936	1414	2.432089545	0.005618127	45.93598808	0.106112132
31.39864631	×ÔÉí³µÁ¾	Road 1	362.9322633	73.23145065	-0.000784039	0.670359373	0.349019617	0	380.0646	986.9258	647.192	0.5763	3.9381	1415	2.419546716	0.005589153	45.97651497	0.10620575
31.41526413	×ÔÉí³µÁ¾	Road 1	363.2704307	73.25884094	-0.00077011	0.67261982	0.349019617	0	380.3498	986.9326	647.1775	0.5746	3.9398	1416	1.913103358	0.004419269	46.00830658	0.106279188
31.43189368	×ÔÉí³µÁ¾	Road 1	363.6089644	73.28648529	-0.000755588	0.673209667	0.349019617	0	380.635	986.9395	647.1629	0.573	3.9414	1417	1.922648203	0.004441317	46.04027936	0.106353045
31.44855659	×ÔÉí³µÁ¾	Road 1	363.9483693	73.32797241	-0.000736012	0.674488962	0.349019617	0	381.0631	986.9492	647.1411	0.571	3.9435	1418	2.447657693	0.005654089	46.08106446	0.106447259
31.46518101	×ÔÉí³µÁ¾	Road 1	364.2871173	73.35551376	-0.000718245	0.673820078	0.349019617	0	381.3486	986.9561	647.1265	0.5693	3.9451	1419	1.920575922	0.00443653	46.11299292	0.106521014
31.48196599	×ÔÉí³µÁ¾	Road 1	364.6293304	73.39703522	-0.000695003	0.674689829	0.349019617	0	381.7771	986.9658	647.1047	0.5673	3.9472	1420	2.439496103	0.005635236	46.15393979	0.106615601
31.49856035	×ÔÉí³µÁ¾	Road 1	364.9677843	73.42457657	-0.000668762	0.674859405	0.349019617	0	382.0629	986.9727	647.0901	0.5657	3.9488	1421	1.924005579	0.004444453	46.18586744	0.106689354
31.5152042	×ÔÉí³µÁ¾	Road 1	365.3073846	73.45421219	-0.000646606	0.67601645	0.349019617	0	382.3692	986.9805	647.0746	0.5634	3.9511	1422	2.001372801	0.004623171	46.21917799	0.106766301
31.53187957	×ÔÉí³µÁ¾	Road 1	365.6478203	73.49572678	-0.000620272	0.675460219	0.349019617	0	382.7982	986.9902	647.0527	0.5615	3.9531	1423	2.452435954	0.005665127	46.26007327	0.106860769
31.54853515	×ÔÉí³µÁ¾	Road 1	365.9879802	73.52346039	-0.000594664	0.675101817	0.349019617	0	383.0844	986.9971	647.0381	0.5598	3.9547	1424	1.929649621	0.004457491	46.2922127	0.106935011
31.56535861	×ÔÉí³µÁ¾	Road 1	366.3316981	73.55111847	-0.000574186	0.67547065	0.349019617	0	383.3706	987.0039	647.0235	0.5582	3.9564	1425	1.916850236	0.004427924	46.32446076	0.107009504
31.58184631	×ÔÉí³µÁ¾	Road 1	366.6687457	73.59253693	-0.000553566	0.675542831	0.349019617	0	383.8003	987.0137	647.0016	0.5562	3.9583	1426	2.469583527	0.005704738	46.3651785	0.107103562
31.59861478	×ÔÉí³µÁ¾	Road 1	367.011662	73.62019501	-0.000535858	0.675021887	0.349019617	0	384.0868	987.0205	646.987	0.5546	3.96	1427	1.921797953	0.004439353	46.39740412	0.107178004
31.61526376	×ÔÉí³µÁ¾	Road 1	367.3523268	73.66177826	-0.000519123	0.675534308	0.349019617	0	384.5168	987.0313	646.9651	0.5517	3.9619	1428	2.462435544	0.005688226	46.43840117	0.107272707
31.63200988	×ÔÉí³µÁ¾	Road 1	367.6951075	73.68933334	-0.000506803	0.675214171	0.349019617	0	384.8036	987.0381	646.9504	0.5501	3.9635	1429	1.920808143	0.004437067	46.47056724	0.10734701
31.64854816	×ÔÉí³µÁ¾	Road 1	368.0337609	73.71699142	-0.000494679	0.675516963	0.349019617	0	385.0905	987.0449	646.9359	0.5484	3.9652	1430	1.938553594	0.004478059	46.50262759	0.10742107
31.66526202	×ÔÉí³µÁ¾	Road 1	368.3762021	73.75845108	-0.000485573	0.674557567	0.349019617	0	385.5211	987.0547	646.9139	0.5465	3.9671	1431	2.454384819	0.005669629	46.54364983	0.107515831
31.68185602	×ÔÉí³µÁ¾	Road 1	368.7163153	73.78617783	-0.000478818	0.675031483	0.349019617	0	385.8083	987.0615	646.8993	0.5449	3.9687	1432	1.939149313	0.004479435	46.57582807	0.107590163
31.69856768	×ÔÉí³µÁ¾	Road 1	369.0589685	73.81381531	-0.000474906	0.674532175	0.349019617	0	386.0956	987.0684	646.8846	0.5433	3.9703	1433	1.928854217	0.004455653	46.60806243	0.107664624
31.71525552	×ÔÉí³µÁ¾	Road 1	369.4013069	73.85129242	-0.000472125	0.674422681	0.349019617	0	386.383	987.0752	646.87	0.5416	3.972	1434	2.307335695	0.005329945	46.64656687	0.107753569
31.73187041	×ÔÉí³µÁ¾	Road 1	369.7422942	73.88276825	-0.000471015	0.674520195	0.349019617	0	386.8143	987.0859	646.848	0.5387	3.9749	1435	2.083969687	0.00481397	46.6811918	0.107833553
31.74853918	×ÔÉí³µÁ¾	Road 1	370.0845795	73.92427597	-0.000471015	0.674964488	0.349019617	0	387.2458	987.0957	646.826	0.5368	3.9768	1436	2.465355646	0.005694972	46.72228625	0.107928481
31.78257539	×ÔÉí³µÁ¾	Road 1	370.7840177	73.97938614	-0.000470461	0.674164832	0.349019617	0	387.8216	987.1094	646.7966	0.5336	3.98	1437	1.910186037	0.00441253	46.78730174	0.108078667
31.79857446	×ÔÉí³µÁ¾	Road 1	371.1129799	74.0207634	-0.000470461	0.674025178	0.349019617	0	388.2538	987.1201	646.7746	0.5307	3.9829	1438	2.52962746	0.005843439	46.82777344	0.108172157
31.81524617	×ÔÉí³µÁ¾	Road 1	371.4559	74.04836655	-0.000470461	0.675195217	0.356862754	0	388.542	987.127	646.7599	0.5291	3.9845	1439	1.935249179	0.004470426	46.86003735	0.108246686
31.8319549	×ÔÉí³µÁ¾	Road 1	371.7997098	74.0759697	-0.000470461	0.675150931	0.356862754	0	388.8303	987.1338	646.7452	0.5275	3.9861	1440	1.933510782	0.00446641	46.89234385	0.108321314
31.84853827	×ÔÉí³µÁ¾	Road 1	372.1411408	74.11954422	-0.000470461	0.67797935	0.356862754	0	389.2835	987.1445	646.7222	0.525	3.9886	1441	2.559074274	0.005911462	46.93478192	0.108419346
31.86519018	×ÔÉí³µÁ¾	Road 1	372.4841304	74.15138397	-0.000470461	0.678548694	0.36470589	0	389.6134	987.1523	646.7053	0.5231	3.9904	1442	2.101756947	0.004855059	46.96978019	0.108500192
31.88191064	×ÔÉí³µÁ¾	Road 1	372.828652	74.17725677	-0.000470461	0.680527091	0.36470589	0	389.8815	987.1592	646.6917	0.5212	3.9924	1443	1.868686779	0.004316666	47.00102549	0.108572369
31.89862963	×ÔÉí³µÁ¾	Road 1	373.1733381	74.21917648	-0.000470461	0.682145596	0.372549027	0	390.3147	987.1689	646.6696	0.5193	3.9943	1444	2.484995886	0.00574034	47.04257212	0.108668342
31.91523022	×ÔÉí³µÁ¾	Road 1	373.515713	74.24731522	-0.000470461	0.684763193	0.372549027	0	390.6037	987.1758	646.6549	0.5177	3.9959	1445	1.9648867	0.004538888	47.07519041	0.10874369
31.93192246	×ÔÉí³µÁ¾	Road 1	373.8601174	74.27741776	-0.000470461	0.686661482	0.380392164	0	390.8928	987.1826	646.6401	0.5161	3.9974	1446	2.035078586	0.004701032	47.10916042	0.108822161
31.96530033	×ÔÉí³µÁ¾	Road 1	374.5494284	74.34625397	-0.000470461	0.691573322	0.380392164	0	391.616	987.2002	646.6033	0.5116	4.0019	1447	2.202679707	0.00508819	47.18268118	0.108991994
31.98205341	×ÔÉí³µÁ¾	Road 1	374.8955793	74.3829277	-0.000470461	0.693191767	0.380392164	0	391.9055	987.207	646.5886	0.51	4.0035	1448	2.285357509	0.005279176	47.22096796	0.109080436
31.99853634	×ÔÉí³µÁ¾	Road 1	375.236308	74.41778183	-0.000470461	0.695793033	0.380392164	0	392.3399	987.2178	646.5664	0.5072	4.0063	1449	2.238394462	0.005170691	47.25786326	0.109165664
32.0152436	×ÔÉí³µÁ¾	Road 1	375.5818161	74.44841309	-0.000470461	0.696372449	0.380392164	0	392.6504	987.2246	646.5506	0.5059	4.0075	1450	2.058382094	0.004754863	47.29225319	0.109245105
32.03195013	×ÔÉí³µÁ¾	Road 1	375.9274429	74.47725906	-0.000470461	0.698159993	0.380392164	0	392.9402	987.2314	646.5358	0.5044	4.0091	1451	1.990363645	0.00459774	47.32550526	0.109321917
32.04857272	×ÔÉí³µÁ¾	Road 1	376.2715414	74.52237167	-0.000470461	0.698955894	0.380392164	0	393.396	987.2432	646.5126	0.5009	4.0126	1452	2.626918628	0.006068182	47.36917144	0.109422786
32.06522573	×ÔÉí³µÁ¾	Road 1	376.6164038	74.55134125	-0.000470461	0.700708687	0.380392164	0	393.6862	987.25	646.4978	0.4993	4.0141	1453	2.000399327	0.004620922	47.40248412	0.109499738
32.08194253	×ÔÉí³µÁ¾	Road 1	376.9627207	74.58014603	-0.000470461	0.701289177	0.380392164	0	393.9764	987.2568	646.483	0.4978	4.0157	1454	1.990428171	0.004597889	47.4357577	0.1095766
32.09852553	×ÔÉí³µÁ¾	Road 1	377.3064285	74.61545334	-0.000470461	0.70195502	0.380392164	0	394.329	987.2656	646.4651	0.4954	4.0181	1455	2.252931648	0.005204272	47.47311806	0.109662903
32.11517011	×ÔÉí³µÁ¾	Road 1	377.6515553	74.64630432	-0.000470461	0.701907039	0.380392164	0	394.6403	987.2725	646.4491	0.4942	4.0193	1456	2.076022122	0.004795611	47.50767258	0.109742724
32.131888	×ÔÉí³µÁ¾	Road 1	377.9984042	74.68980331	-0.000470461	0.703022659	0.380392164	0	395.0764	987.2832	646.4269	0.4913	4.0222	1457	2.55990067	0.005913371	47.55046873	0.109841583
32.14854248	×ÔÉí³µÁ¾	Road 1	378.3440722	74.71892395	-0.000470461	0.703123689	0.380392164	0	395.3672	987.29	646.4121	0.4898	4.0237	1458	2.009977867	0.004643049	47.58394386	0.10991891
32.1651735	×ÔÉí³µÁ¾	Road 1	378.6894065	74.75208893	-0.000470461	0.703003049	0.388235301	0	395.6996	987.2979	646.3951	0.488	4.0255	1459	2.169360627	0.005011223	47.62002254	0.110002252
32.18183971	×ÔÉí³µÁ¾	Road 1	379.0356349	74.78739624	-0.000470461	0.705012918	0.388235301	0	396.0531	987.3066	646.3772	0.4856	4.0279	1460	2.250564079	0.005198803	47.65753091	0.110088896
32.19860855	×ÔÉí³µÁ¾	Road 1	379.3842085	74.83312683	-0.000470461	0.707243741	0.388235301	0	396.5107	987.3174	646.3539	0.4832	4.0304	1461	2.645139213	0.006110272	47.70188684	0.110191359
32.21521208	×ÔÉí³µÁ¾	Road 1	379.7295003	74.866642	-0.000470461	0.707743466	0.388235301	0	396.8438	987.3252	646.3369	0.4814	4.0312	1462	2.188001454	0.005054283	47.73821538	0.110275278
32.23217447	×ÔÉí³µÁ¾	Road 1	380.0823928	74.89589996	-0.000470461	0.708063304	0.388235301	0	397.1353	987.332	646.322	0.4798	4.0327	1463	1.998727238	0.00461706	47.77211856	0.110353594
32.24856429	×ÔÉí³µÁ¾	Road 1	380.4235069	74.92518539	-0.000470461	0.708393037	0.388235301	0	397.4268	987.3398	646.3071	0.4773	4.0353	1464	2.039484808	0.00471121	47.80554536	0.11043081
32.26524626	×ÔÉí³µÁ¾	Road 1	380.7709245	74.97336731	-0.000470461	0.709938169	0.388235301	0	397.9062	987.3506	646.2827	0.4753	4.0373	1465	2.753882329	0.006361468	47.85148554	0.110536932
32.28220571	×ÔÉí³µÁ¾	Road 1	381.1242593	75.00272827	-0.000470461	0.710257947	0.388235301	0	398.1981	987.3584	646.2678	0.4727	4.0399	1466	2.005278706	0.004632194	47.88549397	0.110615491
32.29853249	×ÔÉí³µÁ¾	Road 1	381.4646129	75.04681778	-0.000470461	0.710531592	0.388235301	0	398.6362	987.3682	646.2455	0.471	4.0417	1467	2.634561785	0.006085838	47.92850788	0.110714853
32.3152086	×ÔÉí³µÁ¾	Road 1	381.8123848	75.07621307	-0.000470461	0.710847676	0.396078438	0	398.9284	987.376	646.2307	0.4684	4.0442	1468	2.027366486	0.004683217	47.96231645	0.110792951
32.33195875	×ÔÉí³µÁ¾	Road 1	382.1618378	75.10564957	-0.000470461	0.712036788	0.396078438	0	399.2207	987.3828	646.2157	0.4668	4.0457	1469	2.02458308	0.004676787	47.99622852	0.110871288
32.34850399	×ÔÉí³µÁ¾	Road 1	382.50719	75.1435112	-0.000470461	0.713638127	0.396078438	0	399.5132	987.3896	646.2009	0.4652	4.0473	1470	2.370115668	0.005474967	48.03544267	0.110961873
32.36520759	×ÔÉí³µÁ¾	Road 1	382.8560147	75.17955322	-0.000470461	0.715193868	0.396078438	0	399.952	987.4004	646.1785	0.4623	4.0501	1471	2.286277269	0.0052813	48.07363172	0.111050089
32.38188113	×ÔÉí³µÁ¾	Road 1	383.2043486	75.20910645	-0.000470461	0.715742588	0.396078438	0	400.2448	987.4072	646.1635	0.4607	4.0516	1472	2.036754626	0.004704903	48.10759163	0.111128537
32.39850738	×ÔÉí³µÁ¾	Road 1	383.5519001	75.25360107	-0.000470461	0.716876328	0.396078438	0	400.6841	987.418	646.1412	0.4579	4.0544	1473	2.625208958	0.006064233	48.15123902	0.111229362
32.41520292	×ÔÉí³µÁ¾	Road 1	383.9010375	75.28329163	-0.000470461	0.717225432	0.403921574	0	400.9771	987.4248	646.1262	0.4564	4.0559	1474	2.042298554	0.00471771	48.18533629	0.111308127
32.43186143	×ÔÉí³µÁ¾	Road 1	384.2495388	75.31314011	-0.000471015	0.718562067	0.403921574	0	401.2702	987.4316	646.1113	0.4549	4.0575	1475	2.051729148	0.004739494	48.21951504	0.11138708
32.44854413	×ÔÉí³µÁ¾	Road 1	384.5987632	75.35996246	-0.000471015	0.721197844	0.403921574	0	401.731	987.4434	646.0878	0.4515	4.0608	1476	2.713415138	0.006267989	48.26478214	0.111491647
32.46520961	×ÔÉí³µÁ¾	Road 1	384.9477661	75.3900032	-0.000471015	0.722577572	0.403921574	0	402.0244	987.4502	646.0729	0.45	4.0624	1477	2.060542645	0.004759854	48.29912206	0.111570972
32.4819154	×ÔÉí³µÁ¾	Road 1	385.2978215	75.43487549	-0.000471015	0.723500729	0.403921574	0	402.4648	987.4609	646.0504	0.4472	4.0648	1478	2.637235378	0.006092014	48.34317918	0.111672744
32.49855082	×ÔÉí³µÁ¾	Road 1	385.6465414	75.46499176	-0.000471015	0.724017322	0.403921574	0	402.7585	987.4678	646.0355	0.4457	4.0662	1479	2.067377609	0.004775642	48.37757087	0.111752189
32.51522913	×ÔÉí³µÁ¾	Road 1	385.9963091	75.4970993	-0.000471015	0.72458601	0.403921574	0	403.0734	987.4756	646.0194	0.4435	4.0682	1480	2.142958105	0.004950233	48.41331178	0.11183475
32.53196718	×ÔÉí³µÁ¾	Road 1	386.3475402	75.54234238	-0.000472125	0.725449324	0.403921574	0	403.5143	987.4863	645.9969	0.4408	4.0708	1481	2.651640734	0.00612529	48.45769508	0.111937276
32.54855861	×ÔÉí³µÁ¾	Road 1	386.6958329	75.57237625	-0.000472125	0.725388527	0.411764711	0	403.8085	987.4932	645.9819	0.4393	4.0722	1482	2.069784691	0.004781203	48.49203577	0.112016603
32.5651757	×ÔÉí³µÁ¾	Road 1	387.0448139	75.60477905	-0.000472125	0.726928294	0.411764711	0	404.1237	987.501	645.9659	0.4372	4.0742	1483	2.161824088	0.004993814	48.527959	0.112099585
32.58201236	×ÔÉí³µÁ¾	Road 1	387.3986179	75.65009079	-0.000472125	0.730005443	0.411764711	0	404.5653	987.5117	645.9434	0.4344	4.0769	1484	2.647314251	0.006115296	48.57253092	0.112202546
32.59850189	×ÔÉí³µÁ¾	Road 1	387.7452669	75.68052979	-0.000472125	0.730939746	0.411764711	0	404.8599	987.5186	645.9283	0.4329	4.0784	1485	2.095694846	0.004841055	48.60708794	0.112282373
32.61524104	×ÔÉí³µÁ¾	Road 1	388.0973146	75.71300812	-0.00047268	0.7314803	0.411764711	0	405.1756	987.5264	645.9123	0.4308	4.0805	1486	2.158138984	0.004985301	48.64321336	0.112365823
32.63198716	×ÔÉí³µÁ¾	Road 1	388.4496506	75.74350204	-0.000474906	0.731169939	0.411764711	0	405.4704	987.5332	645.8972	0.4293	4.082	1487	2.080825041	0.004806706	48.6780591	0.112446317
32.64853533	×ÔÉí³µÁ¾	Road 1	388.7979714	75.77602844	-0.000475463	0.732538581	0.411764711	0	405.7864	987.541	645.8811	0.4272	4.0841	1488	2.176247303	0.005027131	48.71407203	0.112529506
32.66515682	×ÔÉí³µÁ¾	Road 1	389.1480068	75.81313477	-0.000478818	0.733059168	0.411764711	0	406.1447	987.5498	645.8629	0.4249	4.0864	1489	2.351933162	0.005432966	48.75316466	0.11261981
32.68190624	×ÔÉí³µÁ¾	Road 1	389.5009186	75.85234909	-0.000479378	0.733732581	0.411764711	0	406.5243	987.5586	645.8436	0.423	4.0884	1490	2.424278793	0.005600084	48.79376991	0.112713608
32.69857501	×ÔÉí³µÁ¾	Road 1	389.8523529	75.90022202	-0.000482187	0.734247506	0.411764711	0	406.9884	987.5703	645.8198	0.4197	4.0917	1491	2.77357379	0.006406955	48.84000199	0.112820405
32.71543036	×ÔÉí³µÁ¾	Road 1	390.2078747	75.93304367	-0.000483878	0.734303474	0.411764711	0	407.3051	987.5781	645.8038	0.4176	4.0938	1492	2.168124807	0.005008368	48.87654649	0.112904822
32.73183998	×ÔÉí³µÁ¾	Road 1	390.5541336	75.96351013	-0.000485573	0.735281825	0.419607848	0	407.6007	987.585	645.7887	0.4161	4.0952	1493	2.109408452	0.004872734	48.91116108	0.112984782
32.74854688	×ÔÉí³µÁ¾	Road 1	390.9068788	76.00948792	-0.000487839	0.735178113	0.419607848	0	408.0444	987.5957	645.7661	0.4135	4.098	1494	2.698366149	0.006233226	48.95624241	0.11308892
32.76525964	×ÔÉí³µÁ¾	Road 1	391.2598899	76.04010544	-0.000490112	0.738420069	0.419607848	0	408.3404	987.6035	645.751	0.411	4.1004	1495	2.095045102	0.004839554	48.99125639	0.113169802
32.78191888	×ÔÉí³µÁ¾	Road 1	391.6119846	76.08632355	-0.000490682	0.739298344	0.419607848	0	408.7845	987.6143	645.7284	0.4083	4.1031	1496	2.715445501	0.006272679	49.03649366	0.1132743
32.79851325	×ÔÉí³µÁ¾	Road 1	391.9628499	76.1171196	-0.000492963	0.739618361	0.427450985	0	409.0808	987.6211	645.7133	0.4069	4.1046	1497	2.112533708	0.004879953	49.07154981	0.11335528
32.81522344	×ÔÉí³µÁ¾	Road 1	392.316318	76.15024338	-0.000494679	0.7405774	0.427450985	0	409.3983	987.6289	645.6971	0.4048	4.1067	1498	2.196491728	0.005073896	49.10825362	0.113440066
32.83189882	×ÔÉí³µÁ¾	Road 1	392.6691929	76.18117676	-0.000494679	0.742996216	0.427450985	0	409.6948	987.6357	645.682	0.4034	4.1081	1499	2.113544696	0.004882288	49.14349776	0.11352148
32.84849684	×ÔÉí³µÁ¾	Road 1	393.0206555	76.22985306	-0.000494679	0.745212436	0.427450985	0	410.161	987.6475	645.6582	0.4002	4.1114	1500	2.824246539	0.00652401	49.19037469	0.113629766
32.86521657	×ÔÉí³µÁ¾	Road 1	393.3748395	76.2609581	-0.000494679	0.745932758	0.427450985	0	410.4578	987.6543	645.6431	0.3987	4.1129	1501	2.1189654	0.00489481	49.22580321	0.113711605
32.88190587	×ÔÉí³µÁ¾	Road 1	393.7285232	76.29207687	-0.000495252	0.745428443	0.427450985	0	410.7547	987.6621	645.6279	0.3963	4.1153	1502	2.122485601	0.004902942	49.26122601	0.113793432
32.89853103	×ÔÉí³µÁ¾	Road 1	394.081012	76.32769318	-0.000495252	0.74741745	0.427450985	0	411.0942	987.6699	645.6107	0.3946	4.117	1503	2.306447746	0.005327894	49.29957106	0.113882009
32.91513822	×ÔÉí³µÁ¾	Road 1	394.4332842	76.36328201	-0.000495252	0.74796623	0.427450985	0	411.4339	987.6777	645.5933	0.393	4.1186	1504	2.307821209	0.005331067	49.33789749	0.113970543
32.93189423	×ÔÉí³µÁ¾	Road 1	394.7888901	76.40130844	-0.000495252	0.748860538	0.427450985	0	411.795	987.6865	645.575	0.3908	4.1199	1505	2.392262454	0.005526126	49.37798228	0.114063139
32.94852195	×ÔÉí³µÁ¾	Road 1	395.141938	76.43695221	-0.000495252	0.748541117	0.427450985	0	412.1349	987.6953	645.5576	0.3882	4.1225	1506	2.310192637	0.005336545	49.41639552	0.114151874
32.96515664	×ÔÉí³µÁ¾	Road 1	395.4953096	76.47501297	-0.000495252	0.749440253	0.427450985	0	412.4963	987.7041	645.5392	0.3859	4.1247	1507	2.406581442	0.005559203	49.45642824	0.114244349
32.98183898	×ÔÉí³µÁ¾	Road 1	395.8499422	76.52868805	-0.000495252	0.749690413	0.427450985	0	413.0069	987.7168	645.5132	0.3825	4.1281	1508	3.022386119	0.006981712	49.5068487	0.114360821
32.99850518	×ÔÉí³µÁ¾	Road 1	396.2043972	76.56438675	-0.000495252	0.750605464	0.427450985	0	413.3474	987.7246	645.4958	0.3809	4.1297	1509	2.312449599	0.005341759	49.54538847	0.114449847
33.01520035	×ÔÉí³µÁ¾	Road 1	396.5596141	76.59588318	-0.000495252	0.749640882	0.427450985	0	413.6455	987.7324	645.4807	0.3785	4.1321	1510	2.144277878	0.004953282	49.58118755	0.114532543
33.03189002	×ÔÉí³µÁ¾	Road 1	396.9148588	76.62711182	-0.000495252	0.750595868	0.427450985	0	413.9438	987.7393	645.4655	0.3771	4.1336	1511	2.134820355	0.004931435	49.61681699	0.114614847
33.04847558	×ÔÉí³µÁ¾	Road 1	397.2681146	76.67635803	-0.000496973	0.750446379	0.427450985	0	414.4127	987.751	645.4415	0.3739	4.1368	1512	2.86325036	0.006614108	49.66430562	0.114724546
33.06518798	×ÔÉí³µÁ¾	Road 1	397.6242171	76.70766907	-0.000496973	0.750299871	0.427450985	0	414.7112	987.7578	645.4263	0.3725	4.1382	1513	2.138330146	0.004939543	49.70004223	0.114807098
33.08183293	×ÔÉí³µÁ¾	Road 1	397.9790278	76.7391243	-0.000497548	0.750786483	0.427450985	0	415.0099	987.7656	645.4111	0.3691	4.1406	1514	2.149860428	0.004966178	49.73582655	0.114889759
33.0985171	×ÔÉí³µÁ¾	Road 1	398.3349023	76.78824692	-0.000499851	0.750431001	0.427450985	0	415.4795	987.7764	645.3872	0.3669	4.1428	1515	2.850437618	0.006584511	49.78338374	0.114999616
33.11514555	×ÔÉí³µÁ¾	Road 1	398.6897331	76.81958542	-0.000502161	0.750726044	0.427450985	0	415.7785	987.7842	645.3719	0.3645	4.1451	1516	2.148386126	0.004962772	49.81910807	0.11508214
33.13190963	×ÔÉí³µÁ¾	Road 1	399.0476039	76.85091019	-0.000503898	0.7506181	0.427450985	0	416.0776	987.791	645.3568	0.3631	4.1466	1517	2.138471873	0.00493987	49.85495758	0.115164952
33.14847027	×ÔÉí³µÁ¾	Road 1	399.4013586	76.90022507	-0.000506803	0.749798357	0.427450985	0	416.5479	987.8027	645.3328	0.3599	4.1497	1518	2.876458711	0.00664462	49.90259358	0.115274991
33.16514308	×ÔÉí³µÁ¾	Road 1	399.7576538	76.93141937	-0.000509134	0.750327766	0.427450985	0	416.8473	987.8105	645.3175	0.3576	4.1521	1519	2.141997307	0.004948014	49.93830669	0.115357488
33.18197753	×ÔÉí³µÁ¾	Road 1	400.1175503	76.9628334	-0.000512059	0.750378013	0.427450985	0	417.1468	987.8174	645.3022	0.3562	4.1535	1520	2.139480363	0.0049422	49.97432368	0.115440688
33.19848356	×ÔÉí³µÁ¾	Road 1	400.4706508	77.01199722	-0.000515583	0.74979198	0.427450985	0	417.6178	987.8291	645.2782	0.353	4.1567	1521	2.880673071	0.006654355	50.02187214	0.115550525
33.21517359	×ÔÉí³µÁ¾	Road 1	400.8278325	77.04321899	-0.000518532	0.749903083	0.427450985	0	417.9176	987.8359	645.2629	0.3516	4.158	1522	2.144484162	0.004953758	50.05766365	0.115633203
33.23195966	×ÔÉí³µÁ¾	Road 1	401.1872153	77.07448883	-0.000520899	0.749379575	0.427450985	0	418.2176	987.8438	645.2477	0.3493	4.1604	1523	2.140011999	0.004943428	50.09358605	0.115716184
33.24853167	×ÔÉí³µÁ¾	Road 1	401.5422519	77.12597351	-0.000523868	0.749363899	0.427450985	0	418.7107	987.8555	645.2225	0.3465	4.1632	1524	2.969875154	0.006860412	50.14280283	0.115829875
33.2651242	×ÔÉí³µÁ¾	Road 1	401.8978715	77.15703049	-0.000525655	0.749737322	0.427450985	0	419.011	987.8633	645.2073	0.3441	4.1655	1525	2.147917914	0.00496169	50.17844222	0.115912202
33.28194289	×ÔÉí³µÁ¾	Road 1	402.2584849	77.18840332	-0.000526252	0.749368668	0.427450985	0	419.3114	987.8701	645.192	0.3428	4.1669	1526	2.144405395	0.004953576	50.21450833	0.115995514
33.29851526	×ÔÉí³µÁ¾	Road 1	402.6140325	77.23527374	-0.000528044	0.749181628	0.427450985	0	419.7622	987.8818	645.1689	0.3392	4.1704	1527	2.78788938	0.006440024	50.26071026	0.116102241
33.31513015	×ÔÉí³µÁ¾	Road 1	402.9706366	77.26651611	-0.000528044	0.749078155	0.427450985	0	420.063	987.8887	645.1536	0.3379	4.1718	1528	2.156306609	0.004981068	50.29653706	0.116185001
33.33182312	×ÔÉí³µÁ¾	Road 1	403.3291337	77.31336594	-0.00053044	0.748888612	0.427450985	0	420.5143	987.9004	645.1306	0.3343	4.1753	1529	2.775933958	0.006412407	50.34287563	0.116292043
33.34852599	×ÔÉí³µÁ¾	Road 1	403.6879882	77.34458771	-0.00053104	0.748794079	0.427450985	0	420.8153	987.9072	645.1154	0.333	4.1767	1530	2.150739963	0.004968209	50.37879915	0.116375026
33.3651823	×ÔÉí³µÁ¾	Road 1	404.0459972	77.37803421	-0.000532242	0.749063313	0.427450985	0	421.138	987.915	645.0989	0.331	4.1786	1531	2.244311928	0.005184361	50.41618111	0.116461378
33.38180818	×ÔÉí³µÁ¾	Road 1	404.4034964	77.40922852	-0.000532843	0.74813664	0.427450985	0	421.4393	987.9229	645.0836	0.3287	4.181	1532	2.156970663	0.004982602	50.45204266	0.116544219
33.39846486	×ÔÉí³µÁ¾	Road 1	404.761885	77.45834427	-0.000535858	0.747693777	0.427450985	0	421.9129	987.9346	645.0593	0.3256	4.1842	1533	2.875675725	0.006642811	50.49994187	0.116654866
33.41511421	×ÔÉí³µÁ¾	Road 1	405.1202594	77.48941498	-0.000535858	0.747843862	0.419607848	0	422.2145	987.9414	645.044	0.3242	4.1856	1534	2.152155257	0.004971479	50.53577384	0.116737638
33.43187132	×ÔÉí³µÁ¾	Road 1	405.4810987	77.52057495	-0.000535858	0.74767518	0.411764711	0	422.5162	987.9492	645.0287	0.3219	4.1879	1535	2.148428691	0.00496287	50.57177531	0.116820801
33.44860645	×ÔÉí³µÁ¾	Road 1	405.8416907	77.56928558	-0.000538277	0.742809474	0.411764711	0	422.9906	987.9609	645.0045	0.3188	4.1911	1536	2.853885769	0.006592476	50.61953543	0.116931127
33.46513849	×ÔÉí³µÁ¾	Road 1	406.1980492	77.60021896	-0.000538277	0.740311146	0.411764711	0	423.2926	987.9678	644.989	0.3174	4.1924	1537	2.158113385	0.004985242	50.65521347	0.117013543
33.48188754	×ÔÉí³µÁ¾	Road 1	406.5592279	77.63087769	-0.000538883	0.739174426	0.411764711	0	423.5948	987.9756	644.9737	0.3151	4.1948	1538	2.131590019	0.004923973	50.69091558	0.117096015
33.49847604	×ÔÉí³µÁ¾	Road 1	406.9171063	77.665979	-0.000538883	0.738824189	0.411764711	0	423.9186	987.9834	644.9572	0.3132	4.1968	1539	2.32398272	0.0053684	50.72946696	0.117185069
33.51513125	×ÔÉí³µÁ¾	Road 1	407.2766263	77.70973206	-0.000538883	0.736307085	0.411764711	0	424.3723	987.9951	644.9341	0.3097	4.2003	1540	2.668107526	0.006163328	50.77390486	0.11728772
33.53197561	×ÔÉí³µÁ¾	Road 1	407.6403721	77.74029465	-0.000538883	0.73573786	0.411764711	0	424.6748	988.002	644.9186	0.3084	4.2016	1541	2.123382693	0.004905014	50.80967187	0.117370342
33.54847577	×ÔÉí³µÁ¾	Road 1	407.996835	77.77297211	-0.000538883	0.734359682	0.403921574	0	424.9991	988.0107	644.9022	0.3055	4.2046	1542	2.235694302	0.005164454	50.84656118	0.117455556
33.56511558	×ÔÉí³µÁ¾	Road 1	408.3564858	77.80991364	-0.000538883	0.732491791	0.403921574	0	425.3669	988.0195	644.8834	0.3034	4.2067	1543	2.397677344	0.005538635	50.88645809	0.117547718
33.58216008	×ÔÉí³µÁ¾	Road 1	408.7250575	77.84673843	-0.000538883	0.730195284	0.403921574	0	425.7347	988.0283	644.8647	0.3013	4.2079	1544	2.358612992	0.005448396	50.92665946	0.117640583
33.59852095	×ÔÉí³µÁ¾	Road 1	409.0790233	77.88564377	-0.000538883	0.728118658	0.403921574	0	426.1245	988.0381	644.8448	0.2986	4.2106	1545	2.5059423	0.005788727	50.96765885	0.117735292
33.61521245	×ÔÉí³µÁ¾	Road 1	409.4402914	77.91781311	-0.000540097	0.726938367	0.403921574	0	426.4494	988.0459	644.8282	0.2967	4.2125	1546	2.203526055	0.005090145	51.004439	0.117820254
33.63199119	×ÔÉí³µÁ¾	Road 1	409.8036188	77.95451431	-0.000540097	0.72508049	0.403921574	0	426.8178	988.0547	644.8094	0.2946	4.2147	1547	2.37955106	0.005496763	51.04436487	0.117912483
33.64846715	×ÔÉí³µÁ¾	Road 1	410.1605459	77.98861313	-0.000540097	0.724972486	0.403921574	0	427.1647	988.0635	644.7917	0.2921	4.2172	1548	2.301139633	0.005315633	51.08227837	0.118000063
33.66518065	×ÔÉí³µÁ¾	Road 1	410.5227876	78.02498474	-0.000540097	0.723542452	0.403921574	0	427.5334	988.0732	644.773	0.289	4.2203	1549	2.373897017	0.005483702	51.12195449	0.118091715
33.68180837	×ÔÉí³µÁ¾	Road 1	410.8833365	78.06097183	-0.000540097	0.716841578	0.403921574	0	427.9023	988.082	644.7542	0.2869	4.2224	1550	2.36683177	0.005467381	51.1613095	0.118182625
33.69853836	×ÔÉí³µÁ¾	Road 1	411.2463309	78.11001892	-0.000540097	0.72743082	0.403921574	0	428.4017	988.0947	644.7288	0.2833	4.2261	1551	2.885862508	0.006666342	51.20958995	0.118294153
33.71517268	×ÔÉí³µÁ¾	Road 1	411.6073886	78.14012833	-0.000540097	0.722695768	0.403921574	0	428.7058	988.1016	644.7133	0.282	4.2274	1552	2.129839376	0.004919929	51.24501838	0.118375992
33.73191293	×ÔÉí³µÁ¾	Road 1	411.9709522	78.18454056	-0.000540097	0.716999114	0.403921574	0	429.1622	988.1133	644.6901	0.2786	4.2309	1553	2.700156117	0.006237361	51.29021967	0.118480407
33.7484765	×ÔÉí³µÁ¾	Road 1	412.3308146	78.21408691	-0.000540097	0.71709162	0.403921574	0	429.4666	988.1201	644.6745	0.2773	4.2322	1554	2.113828062	0.004882943	51.32523222	0.118561286
33.76517057	×ÔÉí³µÁ¾	Road 1	412.6936497	78.24374313	-0.000540097	0.719721973	0.403921574	0	429.7712	988.1279	644.6589	0.275	4.2345	1555	2.109537455	0.004873032	51.36044898	0.118642637
33.7818793	×ÔÉí³µÁ¾	Road 1	413.0570102	78.28829269	-0.000540097	0.718369603	0.403921574	0	430.2282	988.1396	644.6357	0.2716	4.238	1556	2.712284873	0.006265378	51.40576781	0.118747324
33.79852205	×ÔÉí³µÁ¾	Road 1	413.4190726	78.31786652	-0.000540097	0.716137886	0.403921574	0	430.533	988.1465	644.6202	0.2703	4.2393	1557	2.111608986	0.004877817	51.44091079	0.118828504
33.81511641	×ÔÉí³µÁ¾	Road 1	413.7802183	78.34736481	-0.000540097	0.715234697	0.403921574	0	430.838	988.1543	644.6046	0.268	4.2416	1558	2.112718241	0.004880379	51.47597	0.118909491
33.83209162	×ÔÉí³µÁ¾	Road 1	414.1498318	78.38745804	-0.000540097	0.714875102	0.403921574	0	431.143	988.1611	644.5891	0.2667	4.243	1559	2.509237716	0.005796339	51.51856485	0.119007885
33.84843966	×ÔÉí³µÁ¾	Road 1	414.5059418	78.41896133	-0.000540097	0.715860188	0.403921574	0	431.579	988.1719	644.5668	0.2639	4.2458	1560	2.215606676	0.005118051	51.55478567	0.119091555
33.86518725	×ÔÉí³µÁ¾	Road 1	414.8709024	78.45060883	-0.000540097	0.713859558	0.403921574	0	431.9062	988.1797	644.5502	0.262	4.2486	1561	2.191052628	0.005061332	51.59148051	0.11917632
33.88200191	×ÔÉí³µÁ¾	Road 1	415.2374812	78.48409653	-0.000540097	0.713127613	0.403921574	0	432.2552	988.1875	644.5323	0.2605	4.2501	1562	2.260946123	0.005222786	51.62949756	0.119264139
33.89846358	×ÔÉí³µÁ¾	Road 1	415.5965177	78.51763916	-0.000535858	0.712729156	0.403921574	0	432.6045	988.1953	644.5146	0.2591	4.2516	1563	2.293019572	0.005296875	51.66724449	0.119351335
33.91516351	×ÔÉí³µÁ¾	Road 1	415.9609551	78.56166687	-0.000535858	0.712100387	0.403921574	0	433.0631	988.2061	644.4912	0.2576	4.254	1564	2.700459784	0.006238062	51.71234199	0.11945551
33.93183192	×ÔÉí³µÁ¾	Road 1	416.3249077	78.60555725	-0.000535858	0.712275982	0.403921574	0	433.522	988.2168	644.4678	0.2552	4.2574	1565	2.699593643	0.006236061	51.75733991	0.119559455
33.94844608	×ÔÉí³µÁ¾	Road 1	416.6878115	78.63496628	-0.000535858	0.711472213	0.403921574	0	433.8281	988.2227	644.4522	0.2549	4.2577	1566	2.114284607	0.004883997	51.79246697	0.119640599
33.96518376	×ÔÉí³µÁ¾	Road 1	417.0535595	78.66635284	-0.000535858	0.711327136	0.403921574	0	434.1562	988.2305	644.4354	0.2531	4.2605	1567	2.186419594	0.005050629	51.82906258	0.119725135
33.9818749	×ÔÉí³µÁ¾	Road 1	417.4184256	78.69554901	-0.000535858	0.711004019	0.403921574	0	434.4625	988.2373	644.4199	0.2518	4.2618	1568	2.101461908	0.004854377	51.86413836	0.11980616
33.99843481	×ÔÉí³µÁ¾	Road 1	417.7805776	78.72913971	-0.000535858	0.711386502	0.403921574	0	434.8127	988.2441	644.402	0.2514	4.2632	1569	2.292140489	0.005294845	51.90209599	0.119893842
34.01521611	×ÔÉí³µÁ¾	Road 1	418.1477369	78.76462555	-0.000535858	0.711367905	0.403921574	0	435.185	988.252	644.383	0.2503	4.2652	1570	2.351663127	0.005432342	51.94155998	0.119985004
34.03177895	×ÔÉí³µÁ¾	Road 1	418.5102705	78.79814072	-0.000535858	0.712261915	0.403921574	0	435.5355	988.2588	644.3651	0.2508	4.2667	1571	2.290538131	0.005291143	51.97949779	0.12007264
34.04851261	×ÔÉí³µÁ¾	Road 1	418.8767183	78.83585815	-0.000535858	0.711805761	0.403921574	0	435.8862	988.2666	644.3472	0.2494	4.2691	1572	2.448436128	0.005655887	52.02046908	0.120167284
34.06517185	×ÔÉí³µÁ¾	Road 1	419.2417212	78.87575912	-0.000533445	0.711789608	0.403921574	0	436.3466	988.2754	644.3237	0.249	4.2705	1573	2.545683798	0.00588053	52.06287824	0.120265249
34.08186408	×ÔÉí³µÁ¾	Road 1	419.6076507	78.91969757	-0.000532242	0.712013841	0.403921574	0	436.8074	988.2842	644.3002	0.2486	4.2719	1574	2.708585526	0.006256833	52.10809059	0.120369689
34.09850097	×ÔÉí³µÁ¾	Road 1	419.9725019	78.94894867	-0.00053044	0.712408185	0.403921574	0	437.1147	988.291	644.2845	0.2483	4.2742	1575	2.113406119	0.004881968	52.14325108	0.12045091
34.11515032	×ÔÉí³µÁ¾	Road 1	420.3377722	78.9804451	-0.000528044	0.713490188	0.403921574	0	437.4441	988.2969	644.2677	0.2484	4.275	1576	2.205244412	0.005094115	52.17996696	0.120535724
34.13181946	×ÔÉí³µÁ¾	Road 1	420.7036709	79.02239227	-0.000523868	0.712848067	0.403921574	0	437.8835	988.3057	644.2453	0.2476	4.2768	1577	2.632674947	0.006081479	52.22385139	0.120637097
34.14847284	×ÔÉí³µÁ¾	Road 1	421.0693687	79.05376511	-0.000520899	0.713251889	0.403921574	0	438.2132	988.3115	644.2285	0.2477	4.2777	1578	2.201632155	0.00508577	52.260516	0.120721792
34.16517277	×ÔÉí³µÁ¾	Road 1	421.4362451	79.08744507	-0.000518532	0.713730931	0.403921574	0	438.521	988.3174	644.2128	0.2483	4.2789	1579	2.293238066	0.00529738	52.29881292	0.120810258
34.1818573	×ÔÉí³µÁ¾	Road 1	421.8029579	79.12512817	-0.000518532	0.713806093	0.403921574	0	438.961	988.3262	644.1903	0.2475	4.2807	1580	2.459450617	0.005681331	52.33984772	0.120905048
34.19849565	×ÔÉí³µÁ¾	Road 1	422.1687913	79.154496	-0.000516761	0.713379562	0.411764711	0	439.2691	988.3311	644.1746	0.2482	4.281	1581	2.122819344	0.004903713	52.37516793	0.120986638
34.21515306	×ÔÉí³µÁ¾	Road 1	422.5351797	79.18386383	-0.000515583	0.713784456	0.411764711	0	439.5774	988.3369	644.1588	0.2479	4.2812	1582	2.122113858	0.004902083	52.41051685	0.121068294
34.23185959	×ÔÉí³µÁ¾	Road 1	422.9028829	79.23438034	-0.000514406	0.716095567	0.411764711	0	440.106	988.3467	644.1319	0.2477	4.2833	1583	2.986100439	0.006897892	52.46040423	0.121183534
34.24848731	×ÔÉí³µÁ¾	Road 1	423.268988	79.2639267	-0.000512059	0.717478335	0.419607848	0	440.4146	988.3525	644.1161	0.2484	4.2836	1584	2.133464421	0.004928303	52.49587887	0.12126548
34.26519091	×ÔÉí³µÁ¾	Road 1	423.6369009	79.29348679	-0.000509134	0.717806756	0.419607848	0	440.7232	988.3584	644.1004	0.2481	4.2848	1585	2.129181225	0.004918409	52.53144386	0.121347635
34.281911	×ÔÉí³µÁ¾	Road 1	424.0053936	79.34008942	-0.000506803	0.721048892	0.419607848	0	441.2085	988.3672	644.0756	0.2481	4.2848	1586	2.827602175	0.006531761	52.57872163	0.121456847
34.29847531	×ÔÉí³µÁ¾	Road 1	424.3706093	79.3740921	-0.000501583	0.721771777	0.419607848	0	441.5616	988.374	644.0576	0.2477	4.2862	1587	2.325146842	0.005371089	52.61723607	0.121545815
34.31517707	×ÔÉí³µÁ¾	Road 1	424.7389941	79.40388565	-0.000496973	0.722516954	0.419607848	0	441.8707	988.3799	644.0418	0.2474	4.2865	1588	2.141449809	0.004946749	52.65300206	0.121628435
34.33187371	×ÔÉí³µÁ¾	Road 1	425.1074139	79.43585587	-0.000490682	0.723666489	0.419607848	0	442.202	988.3857	644.0249	0.2475	4.2863	1589	2.232026559	0.005155981	52.69026939	0.121714522
34.34846001	×ÔÉí³µÁ¾	Road 1	425.4735957	79.47851715	-0.000486705	0.724352479	0.419607848	0	442.6439	988.3936	644.0023	0.2477	4.2867	1590	2.684328685	0.006200799	52.73479247	0.121817371
34.36514124	×ÔÉí³µÁ¾	Road 1	425.8420116	79.50833817	-0.000481625	0.725751996	0.419607848	0	442.9534	988.3994	643.9865	0.2474	4.2869	1591	2.146511381	0.004958441	52.77059893	0.121900084
34.38181038	×ÔÉí³µÁ¾	Road 1	426.2102991	79.53828278	-0.000477138	0.725632489	0.419607848	0	443.263	988.4043	643.9707	0.2481	4.2862	1592	2.153193141	0.004973876	52.80649081	0.121982994
34.39848576	×ÔÉí³µÁ¾	Road 1	426.5788728	79.57036285	-0.000474906	0.725931168	0.419607848	0	443.5949	988.4111	643.9538	0.2473	4.287	1593	2.241505458	0.005177878	52.84386875	0.122069337
34.41517396	×ÔÉí³µÁ¾	Road 1	426.9479088	79.60890427	-0.000474906	0.726628304	0.419607848	0	443.9933	988.418	643.9335	0.2477	4.2866	1594	2.507681788	0.005792745	52.88571745	0.122166007
34.43178225	×ÔÉí³µÁ¾	Road 1	427.3153456	79.64530334	-0.000474906	0.726485908	0.419607848	0	444.3698	988.4248	643.9142	0.2476	4.2866	1595	2.427595421	0.005607745	52.92603567	0.122259142
34.44844553	×ÔÉí³µÁ¾	Road 1	427.6841575	79.67958755	-0.000474906	0.7272017	0.419607848	0	444.7242	988.4307	643.8961	0.2482	4.286	1596	2.33617741	0.00539657	52.96496404	0.122349067
34.46511064	×ÔÉí³µÁ¾	Road 1	428.0531693	79.71399536	-0.000474906	0.726829648	0.419607848	0	445.0788	988.4375	643.8781	0.2477	4.2864	1597	2.342007874	0.005410038	53.00399385	0.122439226
34.48187032	×ÔÉí³µÁ¾	Road 1	428.4245037	79.76308365	-0.000474906	0.727963209	0.419607848	0	445.5888	988.4463	643.8519	0.2482	4.2859	1598	2.938715456	0.006788433	53.05324578	0.122552998
34.49844415	×ÔÉí³µÁ¾	Road 1	428.7918685	79.79525986	-0.000474906	0.727411449	0.419607848	0	445.9216	988.4521	643.835	0.2483	4.2857	1599	2.259117442	0.005218561	53.09068803	0.122639489
34.51518147	×ÔÉí³µÁ¾	Road 1	429.1629967	79.82528	-0.000474906	0.727300048	0.419607848	0	446.2324	988.458	643.8191	0.2481	4.286	1600	2.157945632	0.004984854	53.12680625	0.122722922
34.53198771	×ÔÉí³µÁ¾	Road 1	429.5358036	79.8575592	-0.000474906	0.728627443	0.419607848	0	446.5654	988.4639	643.8021	0.2482	4.2858	1601	2.246351883	0.005189073	53.16455897	0.122810131
34.54847394	×ÔÉí³µÁ¾	Road 1	429.9016686	79.89177475	-0.000481625	0.72703737	0.419607848	0	446.9208	988.4707	643.7839	0.2478	4.2862	1602	2.353978051	0.005437689	53.20336719	0.122899778
34.56518266	×ÔÉí³µÁ¾	Road 1	430.2726405	79.92821503	-0.000488407	0.727744937	0.419607848	0	447.2986	988.4775	643.7646	0.2478	4.2861	1603	2.427758941	0.005608123	53.24393196	0.122993483
34.58190679	×ÔÉí³µÁ¾	Road 1	430.6441938	79.9797821	-0.000497548	0.726872325	0.419607848	0	447.8323	988.4873	643.7374	0.2477	4.2863	1604	3.052568911	0.007051434	53.2949835	0.123111412
34.59854074	×ÔÉí³µÁ¾	Road 1	431.0138918	80.01182785	-0.000511473	0.727411211	0.419607848	0	448.166	988.4932	643.7205	0.2478	4.2861	1605	2.254163822	0.005207118	53.33247915	0.123198027
34.61516956	×ÔÉí³µÁ¾	Road 1	431.3836143	80.04182739	-0.000525655	0.726868808	0.419607848	0	448.4775	988.498	643.7045	0.2486	4.2853	1606	2.170223556	0.005013216	53.36856741	0.123281391
34.63186876	×ÔÉí³µÁ¾	Road 1	431.7551109	80.08692627	-0.000540704	0.726878583	0.419607848	0	448.9451	988.5068	643.6807	0.2482	4.2857	1607	2.791524578	0.006448422	53.41518363	0.123389074
34.64846789	×ÔÉí³µÁ¾	Road 1	432.1245199	80.11700134	-0.000561629	0.726513863	0.419607848	0	449.257	988.5127	643.6647	0.248	4.2859	1608	2.177363393	0.005029709	53.45132596	0.123472563
34.6651275	×ÔÉí³µÁ¾	Road 1	432.4954429	80.15331116	-0.000581809	0.726867974	0.419607848	0	449.5913	988.5186	643.6477	0.2482	4.2857	1609	2.432783192	0.005619729	53.49185518	0.123566185
34.68178161	×ÔÉí³µÁ¾	Road 1	432.8664213	80.19174271	-0.000602467	0.726706266	0.419607848	0	450.0372	988.5264	643.6249	0.2484	4.2854	1610	2.522553534	0.005827099	53.53386607	0.123663231
34.69852956	×ÔÉí³µÁ¾	Road 1	433.2396299	80.22181091	-0.000628969	0.726748049	0.419607848	0	450.3495	988.5322	643.6089	0.2482	4.2856	1611	2.168375908	0.005008948	53.57018193	0.12374712
34.71518734	×ÔÉí³µÁ¾	Road 1	433.6110469	80.26888046	-0.000652098	0.726161778	0.419607848	0	450.8404	988.541	643.5839	0.2483	4.2856	1612	2.88386128	0.00666172	53.61822065	0.12385809
34.79850958	×ÔÉí³µÁ¾	Road 1	435.4727346	80.43561172	-0.000674378	0.725503623	0.419607848	0	452.5834	988.5723	643.4949	0.2486	4.2853	1613	2.315137721	0.005347968	53.81112312	0.124303694
34.815156	×ÔÉí³µÁ¾	Road 1	435.8448075	80.46552887	-0.000702935	0.725813508	0.419607848	0	452.8966	988.5781	643.4789	0.2484	4.2855	1614	2.175358331	0.005025078	53.84733504	0.124387344
34.83188452	×ÔÉí³µÁ¾	Road 1	436.2189443	80.51471329	-0.000844703	0.724955559	0.419607848	0	453.4114	988.5869	643.4526	0.2489	4.2849	1615	2.971377297	0.006863882	53.89704179	0.124502167
34.84846605	×ÔÉí³µÁ¾	Road 1	436.5899303	80.54440384	-0.000886273	0.725732267	0.419607848	0	453.725	988.5928	643.4366	0.2488	4.285	1616	2.172582316	0.005018665	53.93306654	0.124585384
34.86509524	×ÔÉí³µÁ¾	Road 1	436.9621308	80.57651138	-0.000928312	0.724515557	0.411764711	0	454.061	988.5986	643.4194	0.2494	4.2848	1617	2.270928303	0.005245844	53.97083023	0.124672618
34.88190331	×ÔÉí³µÁ¾	Road 1	437.3385533	80.62326508	-0.000968969	0.722448289	0.403921574	0	454.5541	988.6074	643.3943	0.2496	4.2846	1618	2.864587371	0.006617197	54.0189784	0.12478384
34.89844489	×ÔÉí³µÁ¾	Road 1	437.7091441	80.6529213	-0.001020974	0.719781697	0.403921574	0	454.8681	988.6133	643.3782	0.2494	4.2848	1619	2.176673408	0.005028116	54.05498401	0.124867013
34.91514555	×ÔÉí³µÁ¾	Road 1	438.0834266	80.68044205	-0.001069052	0.717312992	0.396078438	0	455.1597	988.6191	643.3633	0.2488	4.2853	1620	2.07628631	0.004796221	54.08965938	0.124947113
34.93187664	×ÔÉí³µÁ¾	Road 1	438.4586149	80.72863083	-0.001118617	0.713542998	0.388235301	0	455.6759	988.6279	643.337	0.2493	4.2847	1621	2.936670889	0.00678371	54.13879308	0.125060612
34.94846917	×ÔÉí³µÁ¾	Road 1	438.8308303	80.75775146	-0.001178862	0.707479	0.380392164	0	455.9903	988.6338	643.321	0.2491	4.2849	1622	2.152752225	0.004972858	54.17451269	0.125143124
34.9651592	×ÔÉí³µÁ¾	Road 1	439.2053665	80.78655624	-0.00123174	0.700989842	0.372549027	0	456.3048	988.6396	643.3049	0.2489	4.285	1623	2.133048441	0.004927342	54.21011334	0.125225362
34.98183788	×ÔÉí³µÁ¾	Road 1	439.5798549	80.83125687	-0.001286176	0.690385461	0.356862754	0	456.7992	988.6484	643.2797	0.2491	4.2848	1624	2.800336401	0.006468777	54.25681923	0.125333252
34.99850152	×ÔÉí³µÁ¾	Road 1	439.954135	80.85918274	-0.001350006	0.683051407	0.325490206	0	457.1139	988.6543	643.2636	0.2489	4.285	1625	2.099762629	0.004850452	54.29180892	0.125414079
35.0152667	×ÔÉí³µÁ¾	Road 1	440.3308233	80.88656616	-0.001402105	0.669352531	0.301960796	0	457.4288	988.6602	643.2475	0.2487	4.2851	1626	2.070669077	0.004783246	54.32652406	0.125494271
35.03177565	×ÔÉí³µÁ¾	Road 1	440.7019357	80.92606201	-0.001449656	0.643963695	0.278431386	0	457.9013	988.6689	643.2234	0.2485	4.2853	1627	2.602160492	0.006010991	54.36948301	0.125593506
35.0485401	×ÔÉí³µÁ¾	Road 1	441.0789222	80.95414581	-0.001504272	0.713888705	0.262745112	0	458.2389	988.6748	643.2062	0.2487	4.285	1628	2.101416328	0.004854272	54.40471209	0.125674885
35.06515279	×ÔÉí³µÁ¾	Road 1	441.4526953	80.99730835	-0.00154551	1.133607149	0.23137255	0	458.5767	988.6807	643.1889	0.249	4.2847	1629	2.748150552	0.006348228	54.45036627	0.125780346
35.08184356	×ÔÉí³µÁ¾	Road 1	441.8286172	81.08186874	-0.001572592	1.28767097	0.20784314	0	459.05	988.6895	643.1648	0.2487	4.2849	1630	4.478778282	0.010345978	54.52512052	0.125953028
35.09844672	×ÔÉí³µÁ¾	Road 1	442.2027723	81.12663116	-0.00160124	0.864342034	0.168627456	0	459.3658	988.6953	643.1486	0.2486	4.2851	1631	2.820626431	0.006515647	54.57195183	0.126061209
35.11512026	×ÔÉí³µÁ¾	Road 1	442.5786642	81.1591713	-0.001612545	0.671641052	0.137254909	0	459.7043	988.7012	643.1313	0.2488	4.2848	1632	2.299770259	0.005312469	54.61029714	0.126149786
35.13188214	×ÔÉí³µÁ¾	Road 1	442.9567628	81.20540314	-0.001616324	0.847220004	0.105882354	0	460.1783	988.71	643.1072	0.249	4.2849	1633	2.866650222	0.006621962	54.65834759	0.126260783
35.14846624	×ÔÉí³µÁ¾	Road 1	443.331015	81.24094391	-0.001617586	0.902452528	0.074509807	0	460.472	988.7158	643.0922	0.2485	4.2855	1634	2.436151374	0.00562751	54.69874896	0.12635411
35.16510899	×ÔÉí³µÁ¾	Road 1	443.706769	81.27950592	-0.001617586	0.778993785	0.043137256	0	460.811	988.7217	643.0749	0.2488	4.2852	1635	2.559316714	0.005912022	54.74134303	0.126452502
35.18206551	×ÔÉí³µÁ¾	Road 1	444.0897887	81.31801987	-0.001617586	0.597969592	0.027450981	0	461.2632	988.7295	643.0518	0.2492	4.2848	1636	2.528272643	0.00584031	54.78421374	0.126551534
35.19851215	×ÔÉí³µÁ¾	Road 1	444.4614056	81.34310989	-0.001617586	0.614853621	0.011764706	0	461.6024	988.7363	643.0345	0.2485	4.2854	1637	2.004905447	0.004631332	54.8171877	0.126627704
35.21509735	×ÔÉí³µÁ¾	Road 1	444.8362708	81.36861877	-0.001612545	0.652959645	0	0	461.9192	988.7412	643.0183	0.2494	4.2846	1638	2.014232721	0.004652878	54.85059415	0.126704872
35.23212938	×ÔÉí³µÁ¾	Road 1	445.2214183	81.40725632	-0.001612545	0.565779924	0	0	462.4171	988.751	642.9929	0.2486	4.2853	1639	2.528738463	0.005841386	54.8936637	0.126804363
35.2484107	×ÔÉí³µÁ¾	Road 1	445.5896785	81.42683258	-0.001612545	0.490123659	0	0	462.7341	988.7568	642.9767	0.2485	4.2854	1640	1.779316028	0.00411022	54.92263333	0.126871283
35.26512163	×ÔÉí³µÁ¾	Road 1	445.967733	81.44348373	-0.001612545	0.435294181	0	0.011764706	463.0511	988.7627	642.9605	0.2484	4.2855	1641	1.634692602	0.00377614	54.94995056	0.126934386
35.2818168	×ÔÉí³µÁ¾	Road 1	446.3454997	81.45831528	-0.001612545	0.355410486	0	0.011764706	463.4136	988.7686	642.942	0.2492	4.2848	1642	1.558887797	0.003601031	54.97597645	0.126994506
35.29847018	×ÔÉí³µÁ¾	Road 1	446.7223964	81.47465057	-0.001612545	0.344316483	0	0.011764706	463.912	988.7783	642.9166	0.2485	4.2855	1643	1.624275942	0.003752077	55.00302613	0.12705699
35.31514042	×ÔÉí³µÁ¾	Road 1	447.0997309	81.48677673	-0.001612545	0.365496129	0	0.011764706	464.2519	988.7842	642.8992	0.2488	4.2852	1644	1.445997465	0.003340254	55.02713126	0.127112673
35.33184768	×ÔÉí³µÁ¾	Road 1	447.4779564	81.49818878	-0.001612545	0.348893493	0	0.011764706	464.5692	988.79	642.883	0.2487	4.2853	1645	1.414923307	0.003268473	55.05077075	0.12716728
35.34841089	×ÔÉí³µÁ¾	Road 1	447.8529685	81.50859833	-0.001612545	0.305963874	0	0.011764706	464.9091	988.7959	642.8657	0.249	4.2849	1646	1.376621686	0.003179996	55.07357202	0.127219951
35.36508296	×ÔÉí³µÁ¾	Road 1	448.2304896	81.5181015	-0.001612545	0.280456334	0	0.011764706	465.2945	988.8027	642.846	0.2488	4.2848	1647	1.33556229	0.003085149	55.09583861	0.127271387
35.38185474	×ÔÉí³µÁ¾	Road 1	448.6103304	81.53142242	-0.001612545	0.295690477	0	0.011764706	465.8386	988.8125	642.8182	0.2489	4.2847	1648	1.493707642	0.003450465	55.12089074	0.127329258
35.39840805	×ÔÉí³µÁ¾	Road 1	448.9852636	81.54017029	-0.001612545	0.296523362	0	0.011764706	466.1787	988.8193	642.8008	0.2483	4.2853	1649	1.306574615	0.003018187	55.14251888	0.127379219
35.41507462	×ÔÉí³µÁ¾	Road 1	449.3627994	81.54819031	-0.001612545	0.272693276	0	0.011764706	466.5189	988.8252	642.7835	0.2486	4.285	1650	1.273369377	0.002941483	55.16374158	0.127428243
35.4318508	×ÔÉí³µÁ¾	Road 1	449.7428489	81.55483017	-0.001612545	0.259088039	0	0.011764706	466.8364	988.8311	642.7673	0.2485	4.2851	1651	1.21325556	0.00280262	55.18409537	0.12747526
35.44852544	×ÔÉí³µÁ¾	Road 1	450.1206292	81.5615181	-0.001616324	0.256514937	0	0.011764706	467.1766	988.8369	642.7499	0.2488	4.2849	1652	1.217060723	0.00281141	55.20438942	0.12752214
35.4651253	×ÔÉí³µÁ¾	Road 1	450.4967501	81.56907806	-0.001617586	0.257335544	0	0.011764706	467.5622	988.8438	642.7302	0.249	4.2847	1653	1.255447484	0.002900084	55.22522967	0.127570281
35.48190111	×ÔÉí³µÁ¾	Road 1	450.8769044	81.57909622	-0.001618848	0.253058553	0	0.011764706	468.084	988.8535	642.7036	0.2487	4.2851	1654	1.355492019	0.003131187	55.24796915	0.127622809
35.49850647	×ÔÉí³µÁ¾	Road 1	451.2532224	81.58479538	-0.001622637	0.243687108	0	0.011764706	468.4016	988.8594	642.6874	0.2486	4.2852	1655	1.176522828	0.002717768	55.26750573	0.127667938
35.51580352	×ÔÉí³µÁ¾	Road 1	451.6452573	81.59341278	-0.001628967	0.241954252	0	0.011764706	468.9008	988.8682	642.6619	0.2489	4.2849	1656	1.285892189	0.002970411	55.28974788	0.127719318
35.54889254	×ÔÉí³µÁ¾	Road 1	452.3953129	81.60410385	-0.001639128	0.240829214	0	0.011764706	469.5135	988.8789	642.6306	0.2493	4.2846	1657	1.162540601	0.002685469	55.32821521	0.127808177
35.56564599	×ÔÉí³µÁ¾	Road 1	452.7751079	81.61079865	-0.001651889	0.238504082	0	0.011764706	469.8539	988.8857	642.6132	0.2486	4.2853	1658	1.216573252	0.002810284	55.34859701	0.127855259
35.58188553	×ÔÉí³µÁ¾	Road 1	453.1432851	81.61796036	-0.001682784	0.235692412	0	0.011764706	470.1943	988.8916	642.5959	0.249	4.285	1659	1.245851162	0.002877916	55.36882906	0.127901995
35.59843554	×ÔÉí³µÁ¾	Road 1	453.5185268	81.62352219	-0.001690568	0.2358955	0	0.011764706	470.6937	988.9004	642.5704	0.2492	4.2848	1660	1.17189576	0.002707079	55.38822394	0.127946797
35.61512447	×ÔÉí³µÁ¾	Road 1	453.8969425	81.62872696	-0.0017049	0.235874474	0	0.011764706	471.0115	988.9063	642.5541	0.2491	4.2849	1661	1.154886393	0.002667788	55.40749777	0.12799132
35.63179398	×ÔÉí³µÁ¾	Road 1	454.2749535	81.63645172	-0.001725891	0.234997347	0	0.011764706	471.4882	988.915	642.5298	0.249	4.2851	1662	1.261868253	0.002914916	55.42853249	0.12803991
35.64892645	×ÔÉí³µÁ¾	Road 1	454.6634872	81.64154663	-0.001755035	0.234116331	0	0.011764706	471.8061	988.9209	642.5136	0.2489	4.2852	1663	1.144800325	0.002644489	55.44814574	0.128085217
35.66532104	×ÔÉí³µÁ¾	Road 1	455.0353211	81.64901047	-0.001781812	0.233478904	0	0.011764706	472.2829	988.9297	642.4893	0.2488	4.2853	1664	1.256270134	0.002901984	55.46874178	0.128132794
35.68185052	×ÔÉí³µÁ¾	Road 1	455.4102276	81.65189438	-0.001804785	0.233463898	0	0.011764706	472.4645	988.9326	642.48	0.2492	4.285	1665	1.058180541	0.002444397	55.48623296	0.128173198
35.69850024	×ÔÉí³µÁ¾	Road 1	455.7878901	81.65814972	-0.00182112	0.234044477	0	0.011764706	472.8506	988.9395	642.4603	0.2494	4.2849	1666	1.200237494	0.002772549	55.50621657	0.12821936
35.7150803	×ÔÉí³µÁ¾	Road 1	456.1640009	81.66426773	-0.001829324	0.232328042	0	0.011764706	473.2366	988.9473	642.4406	0.2486	4.2857	1667	1.195573621	0.002761775	55.52603926	0.128265151
35.73184218	×ÔÉí³µÁ¾	Road 1	456.5442626	81.66996689	-0.001830694	0.232295468	0	0.011764706	473.6	988.9531	642.422	0.2493	4.285	1668	1.175176021	0.002714657	55.54573742	0.128310653
35.74846917	×ÔÉí³µÁ¾	Road 1	456.9215043	81.67865982	-0.001830694	0.233126163	0	0.011764706	474.1451	988.9639	642.3942	0.2485	4.2859	1669	1.304299605	0.003012932	55.56742399	0.128360749
35.76509982	×ÔÉí³µÁ¾	Road 1	457.2988521	81.683638	-0.001830694	0.231576189	0	0.011764706	474.4631	988.9688	642.3779	0.2494	4.285	1670	1.14661556	0.002648682	55.58649295	0.128404799
35.78213699	×ÔÉí³µÁ¾	Road 1	457.6854468	81.68853378	-0.001830694	0.233076721	0	0.011764706	474.7812	988.9746	642.3617	0.2493	4.2851	1671	1.138210365	0.002629266	55.60588483	0.128449594
35.79848722	×ÔÉí³µÁ¾	Road 1	458.0564904	81.69648514	-0.001830694	0.231526703	0	0.011764706	475.2809	988.9844	642.3362	0.2486	4.2859	1672	1.278747576	0.002953907	55.62679266	0.128497891
35.8151384	×ÔÉí³µÁ¾	Road 1	458.4343865	81.70147018	-0.001830694	0.232783973	0	0.011764706	475.599	988.9902	642.3199	0.2485	4.286	1673	1.146830986	0.00264918	55.64588874	0.128542003
35.832048	×ÔÉí³µÁ¾	Road 1	458.8181709	81.70646896	-0.001826587	0.231919199	0	0.011764706	475.9171	988.9961	642.3037	0.2484	4.2861	1674	1.144225666	0.002643161	55.66523714	0.128586698
35.84840447	×ÔÉí³µÁ¾	Road 1	459.1894246	81.71160507	-0.001822486	0.232367188	0	0.011764706	476.258	989.002	642.2864	0.2488	4.2858	1675	1.157266388	0.002673285	55.68416594	0.128630423
35.8651154	×ÔÉí³µÁ¾	Road 1	459.5687523	81.71777802	-0.00182112	0.232108712	0	0.011764706	476.6443	989.0088	642.2666	0.2489	4.2856	1676	1.196441141	0.002763779	55.70415958	0.128676609
35.88206349	×ÔÉí³µÁ¾	Road 1	459.9534908	81.72356644	-0.00182112	0.232264996	0	0.011764706	477.0079	989.0156	642.248	0.2487	4.2858	1677	1.176831649	0.002718481	55.72410463	0.128722682
35.89841116	×ÔÉí³µÁ¾	Road 1	460.3246375	81.73202591	-0.00182112	0.232726365	0	0.011764706	477.5534	989.0254	642.2203	0.2489	4.2857	1678	1.301179081	0.003005724	55.74537587	0.128771818
35.91507664	×ÔÉí³µÁ¾	Road 1	460.703023	81.73711395	-0.00182112	0.232215449	0	0.011764706	477.8716	989.0313	642.204	0.2491	4.2858	1679	1.151384313	0.002659698	55.76456424	0.128816143
35.93183998	×ÔÉí³µÁ¾	Road 1	461.0836534	81.74198914	-0.00182112	0.232434347	0	0.011764706	478.1898	989.0371	642.1877	0.2491	4.2859	1680	1.141206529	0.002636187	55.78369468	0.128860335
35.9484644	×ÔÉí³µÁ¾	Road 1	461.4611539	81.74731064	-0.001817027	0.232407019	0	0.011764706	478.5308	989.043	642.1703	0.2494	4.2855	1681	1.161943422	0.002684089	55.80301132	0.128904956
35.96513098	×ÔÉí³µÁ¾	Road 1	461.8396505	81.75572891	-0.001804785	0.232188568	0	0.011764706	479.0764	989.0527	642.1425	0.2495	4.2854	1682	1.292727766	0.002986201	55.82455666	0.128954726
35.98189286	×ÔÉí³µÁ¾	Road 1	462.2203352	81.76080322	-0.001792598	0.231928274	0	0.011764706	479.3948	989.0586	642.1262	0.2495	4.2854	1683	1.149811553	0.002656065	55.84382967	0.128999247
35.9984601	×ÔÉí³µÁ¾	Road 1	462.5966334	81.76821899	-0.001765713	0.231298164	0	0.011764706	479.8723	989.0674	642.1019	0.2493	4.2856	1684	1.252264034	0.00289273	55.86457622	0.129047171
36.01512044	×ÔÉí³µÁ¾	Road 1	462.9750676	81.77281265	-0.0017444	0.231718838	0	0.011764706	480.0314	989.0703	642.0938	0.2493	4.2856	1685	1.13085363	0.002612272	55.88341663	0.129090692
36.04849061	×ÔÉí³µÁ¾	Road 1	463.7331533	81.78287201	-0.001714063	0.231238022	0	0.011764706	480.8274	989.085	642.0531	0.2491	4.2858	1686	1.149128649	0.002654487	55.92176325	0.129179273
36.06507251	×ÔÉí³µÁ¾	Road 1	464.1098782	81.78855057	-0.001677608	0.229286849	0	0.011764706	481.1913	989.0918	642.0345	0.2489	4.286	1687	1.178177127	0.002721589	55.94129967	0.129224402
36.08172809	×ÔÉí³µÁ¾	Road 1	464.4883144	81.79663925	-0.001602494	0.229445294	0	0.011764706	481.7145	989.1016	642.0078	0.2486	4.2863	1688	1.279473445	0.002955584	55.96261004	0.129273629
36.09845478	×ÔÉí³µÁ¾	Road 1	464.8683879	81.80128098	-0.001560243	0.229905054	0	0.011764706	482.0329	989.1074	641.9916	0.2486	4.2863	1689	1.132401046	0.002615846	55.98155136	0.129317384
36.11514812	×ÔÉí³µÁ¾	Road 1	465.2477265	81.80623169	-0.001519952	0.22879602	0	0.011764706	482.3514	989.1123	641.9753	0.2495	4.2854	1690	1.1459285	0.002647095	56.00068073	0.129361572
36.13176594	×ÔÉí³µÁ¾	Road 1	465.6253866	81.81436844	-0.001483931	0.229013219	0	0.011764706	482.8975	989.123	641.9474	0.2486	4.2863	1691	1.282510658	0.0029626	56.02199326	0.129410804
36.18229717	×ÔÉí³µÁ¾	Road 1	466.7739966	81.83049774	-0.001439127	0.227859005	0	0.011764706	483.9669	989.1426	641.8928	0.2485	4.2864	1692	1.1621644	0.0026846	56.08071886	0.129546461
36.19840291	×ÔÉí³µÁ¾	Road 1	467.1401126	81.83524933	-0.001399812	0.227838635	0	0.011764706	484.2855	989.1484	641.8766	0.2485	4.2864	1693	1.145136927	0.002645266	56.09916214	0.129589065
36.2150453	×ÔÉí³µÁ¾	Road 1	467.5184488	81.83987045	-0.001289427	0.227219716	0	0.011764706	484.6041	989.1533	641.8603	0.2494	4.2855	1694	1.132912592	0.002617028	56.11801651	0.129632618
36.23237057	×ÔÉí³µÁ¾	Road 1	467.9123468	81.84761581	-0.001259296	0.22760883	0	0.011764706	485.1276	989.1631	641.8336	0.2491	4.2858	1695	1.25279122	0.002893948	56.13972146	0.129682757
36.24839128	×ÔÉí³µÁ¾	Road 1	468.2766059	81.85240173	-0.001232792	0.226079822	0	0.011764706	485.4463	989.1689	641.8173	0.249	4.2859	1696	1.147937597	0.002651736	56.15811223	0.129725239
36.26512163	×ÔÉí³µÁ¾	Road 1	468.6570325	81.85932999	-0.00121186	0.226290047	0	0.011764706	485.9243	989.1777	641.7928	0.2489	4.286	1697	1.229625514	0.002840435	56.1786843	0.129772761
36.28207485	×ÔÉí³µÁ¾	Road 1	469.0425493	81.86410217	-0.001193224	0.225617692	0	0.011764706	486.243	989.1836	641.7766	0.2489	4.286	1698	1.135861025	0.002623839	56.19794081	0.129817243
36.29842472	×ÔÉí³µÁ¾	Road 1	469.414369	81.86921082	-0.001178862	0.226203173	0	0.011764706	486.5845	989.1895	641.7592	0.2492	4.2857	1699	1.157821094	0.002674567	56.21687103	0.129860972
36.31505904	×ÔÉí³µÁ¾	Road 1	469.7926784	81.87374268	-0.001169691	0.22472477	0	0.011764706	486.9033	989.1953	641.7429	0.2491	4.2858	1700	1.129555885	0.002609274	56.23566042	0.129904376
36.33198844	×ÔÉí³µÁ¾	Road 1	470.1777224	81.87878265	-0.001166645	0.225328192	0	0.011764706	487.2448	989.2021	641.7255	0.2484	4.2864	1701	1.147483401	0.002650687	56.25508662	0.12994925
36.34843691	×ÔÉí³µÁ¾	Road 1	470.5518538	81.88437881	-0.001162591	0.224460274	0	0.011764706	487.6319	989.209	641.7057	0.2486	4.2862	1702	1.177627127	0.002720319	56.27445679	0.129993995
36.36510239	×ÔÉí³µÁ¾	Road 1	470.930947	81.88998184	-0.001158546	0.225279287	0	0.011764706	488.019	989.2158	641.6859	0.2487	4.286	1703	1.174843737	0.002713889	56.29403612	0.130039223
36.38193795	×ÔÉí³µÁ¾	Road 1	471.3139351	81.8955574	-0.001158546	0.223558143	0	0.011764706	488.4062	989.2227	641.6663	0.2489	4.2858	1704	1.171344984	0.002705807	56.31375637	0.130084777
36.39838495	×ÔÉí³µÁ¾	Road 1	471.6881192	81.90319977	-0.001158546	0.224849537	0	0.011764706	488.9528	989.2334	641.6383	0.248	4.2866	1705	1.265902623	0.002924235	56.33457668	0.130132872
36.41510285	×ÔÉí³µÁ¾	Road 1	472.0684802	81.90622787	-0.001158546	0.223520398	0	0.011764706	489.1122	989.2354	641.6301	0.249	4.2857	1706	1.065255384	0.00246074	56.3523855	0.130174011
36.43231999	×ÔÉí³µÁ¾	Road 1	472.4602316	81.91284714	-0.001157537	0.224342376	0	0.011764706	489.6134	989.2451	641.6046	0.2482	4.2863	1707	1.209242216	0.00279335	56.3732052	0.130222104
36.44843856	×ÔÉí³µÁ¾	Road 1	472.827017	81.91962433	-0.001153504	0.223462731	0	0.011764706	490.0918	989.2539	641.5802	0.2481	4.2864	1708	1.234802806	0.002852394	56.39310846	0.130268081
36.46504539	×ÔÉí³µÁ¾	Road 1	473.2049339	81.92418365	-0.001146469	0.223442659	0	0.011764706	490.4107	989.2598	641.5639	0.248	4.2865	1709	1.131557129	0.002613897	56.41190003	0.130311489
36.48172296	×ÔÉí³µÁ¾	Road 1	473.584482	81.92879105	-0.001141462	0.222343385	0	0.011764706	490.7297	989.2656	641.5476	0.2479	4.2866	1710	1.132819783	0.002616814	56.43079271	0.130355131
36.49839467	×ÔÉí³µÁ¾	Road 1	473.9639276	81.93546524	-0.001130498	0.223401248	0	0.011764706	491.2082	989.2744	641.5232	0.2478	4.2867	1711	1.220732093	0.002819891	56.4511444	0.130402144
36.51502165	×ÔÉí³µÁ¾	Road 1	474.3423761	81.93996964	-0.001118617	0.22253108	0	0.011764706	491.5272	989.2803	641.5069	0.2477	4.2867	1712	1.129142298	0.002608319	56.46991864	0.130445512
36.53227802	×ÔÉí³µÁ¾	Road 1	474.7351712	81.94439163	-0.001100953	0.223598942	0	0.011764706	491.8462	989.2852	641.4906	0.2486	4.2858	1713	1.118808942	0.002584449	56.48922521	0.13049011
36.54846037	×ÔÉí³µÁ¾	Road 1	475.103541	81.94921875	-0.001081544	0.222734049	0	0.011764706	492.188	989.292	641.4731	0.2479	4.2864	1714	1.148630152	0.002653336	56.50781275	0.130533047
36.56505034	×ÔÉí³µÁ¾	Road 1	475.4812147	81.95467758	-0.001064273	0.223134205	0	0.011764706	492.5755	989.2988	641.4534	0.2481	4.2862	1715	1.170463166	0.00270377	56.52723069	0.130577903
36.58180562	×ÔÉí³µÁ¾	Road 1	475.8626861	81.96205215	-0.001046243	0.222693816	0	0.011764706	493.0997	989.3086	641.4266	0.2478	4.2865	1716	1.249221844	0.002885702	56.54816176	0.130626254
36.59847036	×ÔÉí³µÁ¾	Road 1	476.2421175	81.96664581	-0.001024691	0.222433612	0	0.011764706	493.4188	989.3145	641.4103	0.2477	4.2865	1717	1.132771536	0.002616702	56.5670391	0.13066986
36.61505959	×ÔÉí³µÁ¾	Road 1	476.6198601	81.97325134	-0.001006193	0.22221294	0	0.011764706	493.8975	989.3232	641.3859	0.2475	4.2866	1718	1.219634646	0.002817356	56.5872719	0.130716598
36.63182844	×ÔÉí³µÁ¾	Road 1	477.0017134	81.97772827	-0.000987918	0.222621709	0	0.011764706	494.2166	989.3291	641.3696	0.2474	4.2867	1719	1.126740506	0.002602771	56.60616604	0.130760244
36.64845066	×ÔÉí³µÁ¾	Road 1	477.3802484	81.98219833	-0.000962707	0.221752852	0	0.011764706	494.5358	989.335	641.3533	0.2473	4.2867	1720	1.128161368	0.002606053	56.62491859	0.130803562
36.66514949	×ÔÉí³µÁ¾	Road 1	477.7605608	81.98922958	-0.000940563	0.222575828	0	0.011764706	495.0374	989.3438	641.3277	0.2476	4.2858	1721	1.236024503	0.002855217	56.64555875	0.130851241
36.68178124	×ÔÉí³µÁ¾	Road 1	478.139366	81.99368591	-0.000920493	0.222137541	0	0.011764706	495.3566	989.3496	641.3114	0.2475	4.2859	1722	1.127583172	0.002604717	56.66431244	0.130894562
36.69841959	×ÔÉí³µÁ¾	Road 1	478.518342	81.99814224	-0.000896448	0.222116664	0	0.011764706	495.6759	989.3555	641.2951	0.2474	4.2859	1723	1.127552859	0.002604647	56.68307306	0.130937899
36.71503338	×ÔÉí³µÁ¾	Road 1	478.8967793	82.00260544	-0.000872825	0.222106799	0	0.011764706	495.9951	989.3613	641.2788	0.2473	4.286	1724	1.128171348	0.002606076	56.70181626	0.130981196
36.73171462	×ÔÉí³µÁ¾	Road 1	479.2767882	82.0102272	-0.0008488	0.221659482	0	0.011764706	496.5424	989.3711	641.2509	0.2475	4.2858	1725	1.261665757	0.002914448	56.72286241	0.131029812
36.74839549	×ÔÉí³µÁ¾	Road 1	479.6568093	82.0146698	-0.000818793	0.222059697	0	0.011764706	496.8618	989.377	641.2346	0.2475	4.2859	1726	1.126652301	0.002602567	56.74165595	0.131073225
36.7662816	×ÔÉí³µÁ¾	Road 1	480.0643211	82.02133713	-0.000793418	0.221607834	0	0.011764706	497.3408	989.3857	641.2101	0.2475	4.286	1727	1.202159174	0.002776988	56.7631579	0.131122895
36.78183494	×ÔÉí³µÁ¾	Road 1	480.4187044	82.02608871	-0.000767038	0.221589595	0	0.011764706	497.6829	989.3916	641.1926	0.2479	4.2856	1728	1.154535256	0.002666976	56.78111478	0.131164375
36.79847733	×ÔÉí³µÁ¾	Road 1	480.7979216	82.03042831	-0.00073975	0.221807823	0	0.011764706	498.0023	989.3975	641.1763	0.2478	4.2857	1729	1.122860707	0.002593808	56.79980186	0.131207542
36.8150321	×ÔÉí³µÁ¾	Road 1	481.1751634	82.03498077	-0.00071458	0.221558109	0	0.011764706	498.3216	989.4033	641.16	0.2478	4.2857	1730	1.132999684	0.002617229	56.81855841	0.13125087
36.83191861	×ÔÉí³µÁ¾	Road 1	481.5599953	82.04151764	-0.000694285	0.22219409	0	0.011764706	498.8008	989.4121	641.1356	0.2477	4.2858	1731	1.212548059	0.002800986	56.83903412	0.131298169
36.84846312	×ÔÉí³µÁ¾	Road 1	481.9370542	82.04605637	-0.000672268	0.221080393	0	0.011764706	499.1202	989.418	641.1193	0.2476	4.2859	1732	1.132644593	0.002616409	56.85777317	0.131341456
36.86510294	×ÔÉí³µÁ¾	Road 1	482.3163051	82.0503685	-0.000654856	0.221294224	0	0.011764706	499.4396	989.4238	641.103	0.2475	4.2859	1733	1.121918895	0.002591633	56.87644169	0.13138458
36.88186445	×ÔÉí³µÁ¾	Road 1	482.6983522	82.05522995	-0.000640464	0.221476257	0	0.011764706	499.7819	989.4307	641.0855	0.2468	4.2865	1734	1.143871706	0.002642344	56.89561471	0.13142887
36.89835471	×ÔÉí³µÁ¾	Road 1	483.0742426	82.06120377	-0.000629642	0.220699906	0	0.011764706	500.1698	989.4375	641.0657	0.2469	4.2864	1735	1.195148561	0.002760793	56.91532302	0.131474396
36.91504291	×ÔÉí³µÁ¾	Road 1	483.4546753	82.06741104	-0.00062294	0.220525905	0	0.011764706	500.6491	989.4463	641.0413	0.2468	4.2866	1736	1.202092372	0.002776833	56.93538379	0.131520737
36.93173112	×ÔÉí³µÁ¾	Road 1	483.8351278	82.07169571	-0.000616286	0.22074458	0	0.011764706	500.9686	989.4521	641.025	0.2468	4.2868	1737	1.120432381	0.002588199	56.95408179	0.131563929
36.94835884	×ÔÉí³µÁ¾	Road 1	484.2142229	82.07633057	-0.000612976	0.2213348	0	0.011764706	501.3109	989.458	641.0075	0.2473	4.2869	1738	1.136078595	0.002624342	56.97297218	0.131607566
36.96501441	×ÔÉí³µÁ¾	Road 1	484.5939786	82.0818512	-0.000610338	0.220456287	0	0.011764706	501.699	989.4648	640.9877	0.2475	4.2867	1739	1.173526223	0.002710846	56.99251794	0.131652716
36.98169052	×ÔÉí³µÁ¾	Road 1	484.9742355	82.08899231	-0.000609679	0.220676184	0	0.011764706	502.224	989.4746	640.9609	0.2469	4.287	1740	1.242243761	0.002869583	57.01323373	0.13170057
36.99960852	×ÔÉí³µÁ¾	Road 1	485.3828246	82.09180069	-0.000608363	0.220429167	0	0.011764706	502.3838	989.4775	640.9527	0.2469	4.2871	1741	1.049683334	0.002424769	57.03204195	0.131744017
37.01512227	×ÔÉí³µÁ¾	Road 1	485.7366158	82.0980011	-0.000608363	0.220879853	0	0.011764706	502.8861	989.4863	640.9271	0.2472	4.2868	1742	1.222091922	0.002823032	57.05100119	0.131787813
37.03172983	×ÔÉí³µÁ¾	Road 1	486.1153714	82.10238876	-0.000608363	0.22129041	0	0.011764706	503.2057	989.4922	640.9107	0.2471	4.2868	1743	1.126023871	0.002601115	57.0697017	0.131831011
37.04836232	×ÔÉí³µÁ¾	Road 1	486.4947207	82.1078476	-0.00060705	0.220603198	0	0.011764706	503.5939	989.499	640.8909	0.2473	4.2866	1744	1.171493173	0.002706149	57.08918654	0.131876021
37.06503329	×ÔÉí³µÁ¾	Road 1	486.8749721	82.11307297	-0.000605083	0.221242547	0	0.011764706	503.9821	989.5059	640.8711	0.2474	4.2863	1745	1.161074133	0.002682081	57.10854278	0.131920734
37.08204003	×ÔÉí³µÁ¾	Road 1	487.2629162	82.12031021	-0.000601814	0.221213132	0	0.011764706	504.5073	989.5156	640.8443	0.2474	4.2865	1746	1.240706338	0.002866032	57.12964315	0.131969476
37.0984042	×ÔÉí³µÁ¾	Road 1	487.6362224	82.12470474	-0.000599207	0.220773518	0	0.011764706	504.827	989.5215	640.8279	0.2475	4.2865	1747	1.129334977	0.002608764	57.14812377	0.132012166
37.11500259	×ÔÉí³µÁ¾	Road 1	488.0149023	82.13130341	-0.000594664	0.221172199	0	0.011764706	505.3067	989.5303	640.8035	0.2475	4.2866	1748	1.220958184	0.002820413	57.16838972	0.13205898
37.13231944	×ÔÉí³µÁ¾	Road 1	488.4099943	82.1356842	-0.000591432	0.220731854	0	0.011764706	505.6264	989.5361	640.7872	0.2474	4.2866	1749	1.118396489	0.002583496	57.18775682	0.132103718
37.14835151	×ÔÉí³µÁ¾	Road 1	488.7757929	82.14007874	-0.000588856	0.221140265	0	0.011764706	505.9462	989.542	640.7708	0.2473	4.2866	1750	1.133438935	0.002618244	57.20592819	0.132145694
37.16502908	×ÔÉí³µÁ¾	Road 1	489.1563402	82.1444664	-0.000584365	0.220269993	0	0.011764706	506.266	989.5479	640.7545	0.2472	4.2867	1751	1.125659898	0.002600274	57.22470146	0.13218906
37.18229644	×ÔÉí³µÁ¾	Road 1	489.5503693	82.14947891	-0.000581809	0.221098945	0	0.011764706	506.6315	989.5547	640.7358	0.247	4.2869	1752	1.145019549	0.002644995	57.24447292	0.132234732
37.1983461	×ÔÉí³µÁ¾	Road 1	489.9166365	82.15511627	-0.000576719	0.220230639	0	0.011764706	507.0428	989.5615	640.7148	0.2476	4.2863	1753	1.188353322	0.002745096	57.26354559	0.13227879
37.21504566	×ÔÉí³µÁ¾	Road 1	490.2977684	82.16231918	-0.000572921	0.221047074	0	0.011764706	507.5683	989.5713	640.688	0.2473	4.2866	1754	1.245285668	0.00287661	57.28434132	0.132326828
37.23193474	×ÔÉí³µÁ¾	Road 1	490.683246	82.16668625	-0.000570399	0.22017771	0	0.011764706	507.8882	989.5771	640.6717	0.2473	4.2867	1755	1.122677786	0.002593386	57.30330231	0.132370628
37.24842427	×ÔÉí³µÁ¾	Road 1	491.0596244	82.17107391	-0.000566002	0.221015945	0	0.011764706	508.2081	989.583	640.6554	0.2472	4.2867	1756	1.128057787	0.002605813	57.32190345	0.132413597
37.26513849	×ÔÉí³µÁ¾	Road 1	491.4411519	82.17545471	-0.0005635	0.22014676	0	0.011764706	508.528	989.5889	640.639	0.2471	4.2868	1757	1.125269914	0.002599374	57.34071147	0.132457043
37.28173139	×ÔÉí³µÁ¾	Road 1	491.819946	82.18328247	-0.000562876	0.220538467	0	0.011764706	509.0993	989.5986	640.6099	0.2477	4.2863	1758	1.274238966	0.002943492	57.36185478	0.132505885
37.2983833	×ÔÉí³µÁ¾	Road 1	492.2001075	82.1876358	-0.000558518	0.220947787	0	0.011764706	509.4193	989.6045	640.5935	0.2476	4.2863	1759	1.124917421	0.002598559	57.38058681	0.132549156
37.31502495	×ÔÉí³µÁ¾	Road 1	492.580056	82.19225006	-0.000558518	0.221165806	0	0.011764706	509.7622	989.6113	640.576	0.247	4.287	1760	1.136214534	0.002624656	57.3994953	0.132592834
37.33207715	×ÔÉí³µÁ¾	Road 1	492.9693988	82.19670639	-0.000556038	0.220488816	0	0.011764706	510.0822	989.6172	640.5597	0.2469	4.2871	1761	1.124939667	0.002598611	57.41867798	0.132637146
37.34833941	×ÔÉí³µÁ¾	Road 1	493.3407381	82.20389557	-0.000553566	0.220030844	0	0.011764706	510.6079	989.626	640.5328	0.2477	4.2863	1762	1.253403436	0.002895362	57.43906116	0.132684231
37.36509322	×ÔÉí³µÁ¾	Road 1	493.7233201	82.20785065	-0.000552949	0.220020592	0	0.011764706	510.768	989.6289	640.5247	0.2476	4.2864	1763	1.107103718	0.00255741	57.45760937	0.132727078
37.38197277	×ÔÉí³µÁ¾	Road 1	494.1087971	82.21295929	-0.0005511	0.22042048	0	0.011764706	511.2709	989.6387	640.499	0.247	4.2871	1764	1.154456978	0.002666796	57.47709608	0.132772092
37.39848759	×ÔÉí³µÁ¾	Road 1	494.485965	82.21731949	-0.000550485	0.220830321	0	0.011764706	511.591	989.6445	640.4827	0.247	4.2871	1765	1.127052675	0.002603492	57.49570915	0.132815088
37.41703203	×ÔÉí³µÁ¾	Road 1	494.9095209	82.22417908	-0.00054558	0.219952121	0	0.011764706	512.0941	989.6533	640.457	0.2473	4.2868	1766	1.202353701	0.002777437	57.51800613	0.132866594
37.4317148	×ÔÉí³µÁ¾	Road 1	495.2448957	82.2289444	-0.000541921	0.220542595	0	0.011764706	512.4371	989.6592	640.4395	0.2477	4.2865	1767	1.170184908	0.002703127	57.53518769	0.132906284
37.4484349	×ÔÉí³µÁ¾	Road 1	495.6268354	82.23538513	-0.000533445	0.220332608	0	0.011764706	512.9173	989.668	640.415	0.2476	4.2866	1768	1.213356893	0.002802854	57.55547513	0.132953148
37.46508681	×ÔÉí³µÁ¾	Road 1	496.007238	82.23975906	-0.000528044	0.220312968	0	0.011764706	513.2375	989.6738	640.3986	0.2476	4.2867	1769	1.126319732	0.002601799	57.57423051	0.132996472
37.48242382	×ÔÉí³µÁ¾	Road 1	496.4033121	82.24410553	-0.000519123	0.219874457	0	0.011764706	513.5577	989.6797	640.3823	0.2475	4.2868	1770	1.117860299	0.002582257	57.59361086	0.133041241
37.49843022	×ÔÉí³µÁ¾	Road 1	496.7690183	82.25095825	-0.000508551	0.220694259	0	0.011764706	514.0609	989.6885	640.3566	0.2479	4.2864	1771	1.244031918	0.002873714	57.61352334	0.133087239
37.51510523	×ÔÉí³µÁ¾	Road 1	497.1500208	82.25539398	-0.000497548	0.220015377	0	0.011764706	514.3811	989.6943	640.3403	0.2478	4.2865	1772	1.12885254	0.002607649	57.63234696	0.133130721
37.53218418	×ÔÉí³µÁ¾	Road 1	497.5402732	82.25965118	-0.000486705	0.22023502	0	0.011764706	514.7014	989.7002	640.3239	0.2478	4.2866	1773	1.116992398	0.002580252	57.65142402	0.133174789
37.54845377	×ÔÉí³µÁ¾	Road 1	497.9120529	82.26431351	-0.000474906	0.219365865	0	0.011764706	515.0445	989.707	640.3064	0.2472	4.2872	1774	1.143555495	0.002641613	57.6700292	0.133217767
37.56507233	×ÔÉí³µÁ¾	Road 1	498.2918399	82.27147522	-0.000461656	0.220183596	0	0.011764706	515.5707	989.7168	640.2795	0.247	4.2875	1775	1.246273903	0.002878893	57.69074048	0.133265611
37.58191925	×ÔÉí³µÁ¾	Road 1	498.676866	82.27580795	-0.000450266	0.22017397	0	0.011764706	515.891	989.7217	640.2632	0.2479	4.2866	1776	1.122781451	0.002593625	57.70965589	0.133309305
37.59843114	×ÔÉí³µÁ¾	Road 1	499.0542623	82.28171997	-0.000437481	0.220573545	0	0.011764706	516.2114	989.7275	640.2468	0.2479	4.2867	1777	1.194558013	0.002759429	57.7293803	0.133354868
37.61501304	×ÔÉí³µÁ¾	Road 1	499.433283	82.28699341	-0.000428573	0.220123798	0	0.011764706	516.7148	989.7373	640.2211	0.2473	4.2873	1778	1.16615641	0.002693821	57.74871739	0.133399537
37.63193071	×ÔÉí³µÁ¾	Road 1	499.819999	82.29134674	-0.000417736	0.220533416	0	0.011764706	517.0352	989.7432	640.2048	0.2472	4.2873	1779	1.123037912	0.002594218	57.76771657	0.133443425
37.64838871	×ÔÉí³µÁ¾	Road 1	500.1962276	82.29569321	-0.000410109	0.21966435	0	0.011764706	517.3555	989.749	640.1884	0.2472	4.2874	1780	1.127895857	0.002605439	57.78627948	0.133486306
37.66501606	×ÔÉí³µÁ¾	Road 1	500.576349	82.30034866	-0.000400084	0.22049354	0	0.011764706	517.6989	989.7549	640.1709	0.2476	4.287	1781	1.139246054	0.002631658	57.80522213	0.133530063
37.68196232	×ÔÉí³µÁ¾	Road 1	500.9637847	82.30540924	-0.000391693	0.218965277	0	0.011764706	518.0651	989.7617	640.1522	0.2474	4.2872	1782	1.15255309	0.002662398	57.82475359	0.133575181
37.69835874	×ÔÉí³µÁ¾	Road 1	501.3386832	82.31274948	-0.000382937	0.220024139	0	0.011764706	518.6144	989.7715	640.1241	0.2476	4.2869	1783	1.258646109	0.002907473	57.84539088	0.133622853
37.71503302	×ÔÉí³µÁ¾	Road 1	501.7199548	82.31708221	-0.000376695	0.220004201	0	0.011764706	518.9349	989.7773	640.1078	0.2476	4.287	1784	1.125088502	0.002598954	57.86415092	0.133666189
37.73176521	×ÔÉí³µÁ¾	Road 1	502.1025808	82.32359161	-0.000370993	0.219984263	0	0.011764706	519.4156	989.7861	640.0833	0.2475	4.287	1785	1.217057793	0.002811404	57.88451496	0.13371323
37.74848896	×ÔÉí³µÁ¾	Road 1	502.4850256	82.32606354	-0.000366755	0.219964176	0	0.011764706	519.5988	989.7891	640.0739	0.2479	4.2866	1786	1.045472493	0.002415041	57.90199919	0.133753618
37.76505804	×ÔÉí³µÁ¾	Road 1	502.8639572	82.33134384	-0.000363015	0.219944775	0	0.011764706	519.988	989.7969	640.054	0.2472	4.2874	1787	1.167093287	0.002695985	57.92133684	0.133798288
37.7822092	×ÔÉí³µÁ¾	Road 1	503.2562247	82.33628769	-0.000359764	0.219924107	0	0.011764706	520.3543	989.8037	640.0353	0.247	4.2876	1788	1.145491992	0.002646087	57.94098336	0.133843672
37.79846083	×ÔÉí³µÁ¾	Road 1	503.6279441	82.34186325	-0.000356992	0.219901487	0	0.011764706	520.7665	989.8105	640.0143	0.2476	4.2869	1789	1.184560784	0.002736335	57.9602344	0.133888141
37.81497382	×ÔÉí³µÁ¾	Road 1	504.0056641	82.3468071	-0.000355612	0.220302776	0	0.011764706	521.1329	989.8174	639.9956	0.2475	4.2871	1790	1.153527435	0.002664648	57.97928259	0.133932143
37.83235921	×ÔÉí³µÁ¾	Road 1	504.4033634	82.35175781	-0.000353777	0.219433442	0	0.011764706	521.4993	989.8242	639.9769	0.2473	4.2873	1791	1.143168152	0.002640718	57.99915701	0.133978053
37.84837515	×ÔÉí³µÁ¾	Road 1	504.7697702	82.35948944	-0.000351948	0.220252097	0	0.011764706	522.0718	989.834	639.9476	0.2479	4.2866	1792	1.284151437	0.00296639	58.0197239	0.134025562
37.86507141	×ÔÉí³µÁ¾	Road 1	505.1517514	82.36165924	-0.000349217	0.21939294	0	0.011764706	522.2322	989.8369	639.9395	0.2479	4.2867	1793	1.033088758	0.002386435	58.03697263	0.134065407
37.88173946	×ÔÉí³µÁ¾	Road 1	505.5331239	82.36967926	-0.0003465	0.220213309	0	0.011764706	522.8278	989.8486	639.9091	0.247	4.2876	1794	1.283144809	0.002964065	58.05836014	0.134114812
37.89836424	×ÔÉí³µÁ¾	Road 1	505.9135268	82.37399826	-0.000342899	0.21977368	0	0.011764706	523.1484	989.8545	639.8927	0.2473	4.2876	1795	1.125621565	0.002600186	58.07707336	0.134158039
37.91503338	×ÔÉí³µÁ¾	Road 1	506.2949664	82.37872238	-0.000337989	0.219944298	0	0.011764706	523.4921	989.8604	639.8751	0.2477	4.2872	1796	1.142477986	0.002639124	58.09611749	0.134202031
37.93199504	×ÔÉí³µÁ¾	Road 1	506.6831194	82.38295212	-0.000330931	0.21973443	0	0.011764706	523.8128	989.8662	639.8588	0.2477	4.2872	1797	1.118291444	0.002583253	58.11508556	0.134245848
37.94840136	×ÔÉí³µÁ¾	Road 1	507.05859	82.38861008	-0.000321817	0.220144168	0	0.011764706	524.1794	989.873	639.8401	0.2475	4.2874	1798	1.186335577	0.002740435	58.13454896	0.134290808
37.96499865	×ÔÉí³µÁ¾	Road 1	507.4384591	82.39467316	-0.000311608	0.219694495	0	0.011764706	524.6835	989.8818	639.8143	0.2479	4.287	1799	1.20095451	0.002774205	58.15448156	0.134336852
37.98201382	×ÔÉí³µÁ¾	Road 1	507.8279126	82.39898529	-0.000301206	0.2200941	0	0.011764706	525.0042	989.8877	639.798	0.2478	4.2871	1800	1.121340375	0.002590296	58.17356135	0.134380927
37.99847843	×ÔÉí³µÁ¾	Road 1	508.2047842	82.40330429	-0.000288632	0.219227567	0	0.011764706	525.3251	989.8936	639.7816	0.2478	4.2871	1801	1.127715179	0.002605022	58.19212873	0.134423817
38.0150211	×ÔÉí³µÁ¾	Road 1	508.5834773	82.41079559	-0.000277191	0.219386578	0	0.011764706	525.8751	989.9033	639.7535	0.248	4.2869	1802	1.26347223	0.002918621	58.21302995	0.134472099
38.03202344	×ÔÉí³µÁ¾	Road 1	508.9727129	82.41501846	-0.000265299	0.220035702	0	0.011764706	526.1959	989.9092	639.7371	0.248	4.2869	1803	1.117897313	0.002582343	58.23203682	0.134516005
38.04836818	×ÔÉí³µÁ¾	Road 1	509.346915	82.41963959	-0.000253386	0.219585747	0	0.011764706	526.5397	989.916	639.7195	0.2474	4.2875	1804	1.142414633	0.002638978	58.25070929	0.134559138
38.06498271	×ÔÉí³µÁ¾	Road 1	509.7273149	82.42424698	-0.000243259	0.219996974	0	0.011764706	526.8835	989.9219	639.702	0.2477	4.2871	1805	1.138602931	0.002630173	58.26962664	0.134602838
38.08226436	×ÔÉí³µÁ¾	Road 1	510.1230217	82.43102417	-0.000233753	0.219966441	0	0.011764706	527.3878	989.9307	639.6763	0.248	4.2867	1806	1.220481192	0.002819312	58.29071857	0.13465156
38.09834738	×ÔÉí³µÁ¾	Road 1	510.4913019	82.43532257	-0.000224159	0.219946384	0	0.011764706	527.7087	989.9365	639.6599	0.248	4.2868	1807	1.131558129	0.002613899	58.30891744	0.134693599
38.11497547	×ÔÉí³µÁ¾	Road 1	510.8720834	82.4396347	-0.000216148	0.219506964	0	0.011764706	528.0297	989.9424	639.6435	0.2478	4.2868	1808	1.12594853	0.002600941	58.32763981	0.134736848
38.13174138	×ÔÉí³µÁ¾	Road 1	511.2560531	82.44649429	-0.000208653	0.218818322	0	0.011764706	528.5341	989.9521	639.6177	0.2472	4.2874	1809	1.232750165	0.002847653	58.34830799	0.134784591
38.14840686	×ÔÉí³µÁ¾	Road 1	511.637742	82.45070343	-0.000200704	0.219887078	0	0.011764706	528.8551	989.958	639.6014	0.2471	4.2874	1810	1.121241454	0.002590068	58.36699401	0.134827756
38.16498729	×ÔÉí³µÁ¾	Road 1	512.0175035	82.45509796	-0.000195724	0.219207868	0	0.011764706	529.1761	989.9639	639.585	0.2471	4.2875	1811	1.130175528	0.002610705	58.38573281	0.134871043
38.1823243	×ÔÉí³µÁ¾	Road 1	512.4146257	82.46175842	-0.000189616	0.219417617	0	0.011764706	529.6806	989.9727	639.5592	0.2475	4.2871	1812	1.21513446	0.002806961	58.40679961	0.134919707
38.19836223	×ÔÉí³µÁ¾	Road 1	512.7820105	82.46606369	-0.000183932	0.218978077	0	0.011764706	530.0016	989.9785	639.5428	0.2474	4.2871	1813	1.132708777	0.002616557	58.42496591	0.134961671
38.21502257	×ÔÉí³µÁ¾	Road 1	513.1636828	82.47251129	-0.000179235	0.219377667	0	0.011764706	530.4833	989.9873	639.5182	0.2473	4.2871	1814	1.217268885	0.002811891	58.44524603	0.135008518
38.23189552	×ÔÉí³µÁ¾	Road 1	513.5502457	82.47680283	-0.000174905	0.219357967	0	0.011764706	530.8044	989.9932	639.5019	0.2473	4.2872	1815	1.122768468	0.002593595	58.46419044	0.13505228
38.24836049	×ÔÉí³µÁ¾	Road 1	513.9274815	82.48108749	-0.000170927	0.219338849	0	0.011764706	531.1255	989.999	639.4855	0.2472	4.2872	1816	1.127006097	0.002603384	58.48274656	0.135095145
38.26497648	×ÔÉí³µÁ¾	Road 1	514.308207	82.4875351	-0.000167844	0.219319075	0	0.011764706	531.6072	990.0078	639.4609	0.2471	4.2872	1817	1.218172357	0.002813978	58.5029877	0.135141902
38.2819165	×ÔÉí³µÁ¾	Road 1	514.6963775	82.49182663	-0.000165625	0.219718665	0	0.011764706	531.9283	990.0137	639.4445	0.2471	4.2873	1818	1.122200363	0.002592283	58.52199781	0.135185815
38.29843206	×ÔÉí³µÁ¾	Road 1	515.0748411	82.49611816	-0.0001637	0.218859747	0	0.011764706	532.2496	990.0195	639.4281	0.247	4.2873	1819	1.126884973	0.002603104	58.54060894	0.135228807
38.31507884	×ÔÉí³µÁ¾	Road 1	515.4563487	82.50407639	-0.000163152	0.279959708	0	0	532.7543	990.0283	639.4023	0.2474	4.2869	1820	1.282540474	0.002962668	58.56195911	0.135278126
38.33171462	×ÔÉí³µÁ¾	Road 1	515.8376498	82.51392975	-0.000163152	0.366101861	0	0	533.0755	990.0342	639.3859	0.2473	4.2869	1821	1.364108541	0.003151091	58.58465212	0.135330546
38.3483724	×ÔÉí³µÁ¾	Road 1	516.2195116	82.52615891	-0.000163152	0.37157622	0	0	533.3968	990.04	639.3695	0.2472	4.2869	1822	1.465412591	0.003385103	58.60906264	0.135386935
38.36498033	×ÔÉí³µÁ¾	Road 1	516.6003026	82.54176636	-0.000163152	0.280659616	0.011764706	0	533.9247	990.0498	639.3426	0.247	4.2871	1823	1.61228089	0.003724369	58.63583928	0.135448789
38.38182285	×ÔÉí³µÁ¾	Road 1	516.9865084	82.54946365	-0.000162606	0.284025639	0.019607844	0	534.269	990.0557	639.325	0.2474	4.2867	1824	1.268066774	0.002929234	58.65719672	0.135498124
38.39835636	×ÔÉí³µÁ¾	Road 1	517.3656685	82.55812912	-0.000162606	0.326447368	0.027450981	0	534.5905	990.0615	639.3086	0.2473	4.2867	1825	1.31603716	0.003040046	58.67895544	0.135548387
38.41504896	×ÔÉí³µÁ¾	Road 1	517.7485256	82.56866226	-0.000162606	0.347393543	0.035294119	0	534.9119	990.0674	639.2922	0.2473	4.2868	1826	1.39243079	0.003216515	58.70219873	0.135602079
38.43177529	×ÔÉí³µÁ¾	Road 1	518.1322323	82.58504562	-0.000162606	0.313591748	0.043137256	0	535.4401	990.0771	639.2652	0.2471	4.2869	1827	1.641322828	0.003791456	58.72965203	0.135665496
38.4484096	×ÔÉí³µÁ¾	Road 1	518.5138683	82.59367676	-0.000162606	0.302524805	0.050980393	0	535.7616	990.083	639.2488	0.247	4.287	1828	1.312734722	0.003032417	58.75148848	0.135715938
38.4650212	×ÔÉí³µÁ¾	Road 1	518.8950235	82.60247955	-0.000162606	0.316918403	0.05882353	0	536.0832	990.0889	639.2324	0.247	4.287	1829	1.320725392	0.003050876	58.77342783	0.135766618
38.48207082	×ÔÉí³µÁ¾	Road 1	519.2862756	82.61222992	-0.000162606	0.334718108	0.05882353	0	536.4048	990.0947	639.2159	0.2469	4.287	1830	1.350800479	0.003120349	58.79645847	0.135819819
38.49833015	×ÔÉí³µÁ¾	Road 1	519.6594481	82.62461014	-0.000162606	0.334238559	0.05882353	0	536.7954	990.1016	639.196	0.2471	4.2868	1831	1.486281035	0.003433309	58.82062441	0.135875642
38.51501249	×ÔÉí³µÁ¾	Road 1	520.0423836	82.63637238	-0.000162606	0.320184708	0.05882353	0	537.186	990.1094	639.1761	0.2464	4.2875	1832	1.446212198	0.00334075	58.84475061	0.135931374
38.53175384	×ÔÉí³µÁ¾	Road 1	520.4267231	82.64697418	-0.000162606	0.319285631	0.05882353	0	537.5538	990.1152	639.1573	0.2472	4.2868	1833	1.395083632	0.003222643	58.86810619	0.135985325
38.54836727	×ÔÉí³µÁ¾	Road 1	520.8081798	82.65870895	-0.000162606	0.329194397	0.05882353	0	537.9445	990.123	639.1374	0.2464	4.2875	1834	1.447430259	0.003343564	58.89215297	0.136040873
38.56496236	×ÔÉí³µÁ¾	Road 1	521.1892741	82.67209854	-0.000162606	0.331501722	0.05882353	0	538.3353	990.1299	639.1174	0.2466	4.2873	1835	1.519399989	0.003509814	58.91736756	0.136099119
38.5817422	×ÔÉí³µÁ¾	Road 1	521.5746758	82.68530273	-0.000162606	0.324230045	0.05882353	0	538.8182	990.1387	639.0928	0.2466	4.2873	1836	1.505359501	0.00347738	58.94262725	0.136157469
38.5983516	×ÔÉí³µÁ¾	Road 1	521.9562096	82.69547195	-0.000162606	0.322492242	0.05882353	0	539.1631	990.1445	639.0752	0.247	4.287	1837	1.380711071	0.003189443	58.96556002	0.136210444
38.61502514	×ÔÉí³µÁ¾	Road 1	522.3392676	82.70641708	-0.000164523	0.325847954	0.05882353	0	539.485	990.1504	639.0587	0.2469	4.287	1838	1.412427388	0.003262707	58.98911019	0.136264845
38.6319593	×ÔÉí³µÁ¾	Road 1	522.7283757	82.71972427	-0.000164798	0.330032945	0.05882353	0	539.9681	990.1592	639.0341	0.2469	4.2871	1839	1.505082633	0.003476741	59.0145975	0.13632372
38.64829267	×ÔÉí³µÁ¾	Road 1	523.103724	82.72961884	-0.000165625	0.327206105	0.05882353	0	540.2902	990.165	639.0176	0.2469	4.2871	1840	1.376533152	0.003179792	59.03708093	0.136375657
38.66500837	×ÔÉí³µÁ¾	Road 1	523.4879027	82.73922501	-0.000166455	0.326556742	0.05882353	0	540.6123	990.1709	639.0012	0.2469	4.2871	1841	1.354416911	0.003128703	59.05972095	0.136427955
38.68173726	×ÔÉí³µÁ¾	Road 1	523.8724563	82.75461273	-0.000166455	0.329901576	0.05882353	0	541.0035	990.1787	638.9812	0.2461	4.2879	1842	1.601414134	0.003699267	59.08651083	0.13648984
38.69835471	×ÔÉí³µÁ¾	Road 1	524.2545009	82.76601105	-0.000166732	0.333237708	0.05882353	0	541.4868	990.1875	638.9565	0.2461	4.2879	1843	1.434317247	0.003313273	59.11034553	0.136544898
38.71503412	×ÔÉí³µÁ¾	Road 1	524.6380162	82.77603607	-0.000166732	0.333197713	0.05882353	0	541.809	990.1934	638.9401	0.2461	4.288	1844	1.373742123	0.003173344	59.13325873	0.136597828
38.73206395	×ÔÉí³µÁ¾	Road 1	525.0296637	82.79183578	-0.000166732	0.333577484	0.05882353	0	542.3156	990.2021	638.9142	0.2465	4.2876	1845	1.607676401	0.003713732	59.16063719	0.136661072
38.74831925	×ÔÉí³µÁ¾	Road 1	525.4035445	82.80198441	-0.000167844	0.336494118	0.05882353	0	542.6379	990.208	638.8978	0.2465	4.2877	1846	1.390739352	0.003212608	59.18324408	0.136713294
38.76494807	×ÔÉí³µÁ¾	Road 1	525.7860638	82.81221542	-0.000168122	0.3381522	0.050980393	0	542.9603	990.2139	638.8813	0.2465	4.2877	1847	1.384384198	0.003197927	59.20626475	0.136766472
38.78202995	×ÔÉí³µÁ¾	Road 1	526.1790819	82.82841339	-0.000168681	0.338929534	0.050980393	0	543.467	990.2227	638.8555	0.247	4.2873	1848	1.62291603	0.003748936	59.23398721	0.13683051
38.79837872	×ÔÉí³µÁ¾	Road 1	526.5552796	82.83874054	-0.000169801	0.33973825	0.050980393	0	543.7895	990.2285	638.839	0.247	4.2874	1849	1.396484856	0.00322588	59.25681802	0.13688325
38.81503063	×ÔÉí³µÁ¾	Road 1	526.9385007	82.84908829	-0.000170927	0.339698017	0.050980393	0	544.112	990.2344	638.8225	0.247	4.2874	1850	1.38927456	0.003209224	59.2799521	0.136936689
38.83172104	×ÔÉí³µÁ¾	Road 1	527.3226832	82.86542358	-0.000172341	0.340908349	0.043137256	0	544.619	990.2441	638.7966	0.2464	4.288	1851	1.645324541	0.0038007	59.30741323	0.137000125
38.84838981	×ÔÉí³µÁ¾	Road 1	527.7064196	82.87658844	-0.000174619	0.341279447	0.043137256	0	544.9647	990.25	638.779	0.2468	4.2876	1852	1.424290574	0.003290111	59.33115441	0.137054967
38.86504686	×ÔÉí³µÁ¾	Road 1	528.0899341	82.88698425	-0.000175765	0.339959383	0.043137256	0	545.2874	990.2559	638.7625	0.2468	4.2876	1853	1.391702391	0.003214833	59.35433606	0.137108516
38.88181497	×ÔÉí³µÁ¾	Road 1	528.4760784	82.90256424	-0.000178074	0.341164827	0.043137256	0	545.7714	990.2646	638.7378	0.2468	4.2877	1854	1.610412738	0.003720053	59.38133964	0.137170895
38.89839137	×ÔÉí³µÁ¾	Road 1	528.8578563	82.91307678	-0.00018128	0.340882361	0.043137256	0	546.0942	990.2705	638.7213	0.2468	4.2877	1855	1.399266611	0.003232306	59.40453444	0.137224475
38.91495824	×ÔÉí³µÁ¾	Road 1	529.2394661	82.92423477	-0.000183932	0.340422422	0.043137256	0	546.4401	990.2764	638.7036	0.2473	4.2872	1856	1.427592268	0.003297738	59.42818518	0.137279108
38.93173075	×ÔÉí³µÁ¾	Road 1	529.6258843	82.93961563	-0.000187209	0.340840846	0.043137256	0	546.9244	990.2852	638.679	0.2473	4.2872	1857	1.602315805	0.00370135	59.45506004	0.137341189
38.94837203	×ÔÉí³µÁ¾	Road 1	530.0093273	82.95002518	-0.000190827	0.34122315	0.035294119	0	547.2474	990.291	638.6625	0.2473	4.2871	1858	1.393547943	0.003219096	59.47825046	0.137394759
38.96502834	×ÔÉí³µÁ¾	Road 1	530.3931651	82.96051712	-0.000194185	0.340094298	0.035294119	0	547.5703	990.2969	638.646	0.2473	4.2871	1859	1.396827857	0.003226672	59.50151646	0.137448503
38.98180965	×ÔÉí³µÁ¾	Road 1	530.7799356	82.97170944	-0.000197271	0.339385837	0.035294119	0	547.9164	990.3037	638.6283	0.2467	4.2876	1860	1.423533973	0.003288363	59.52540522	0.137503686
38.99838202	×ÔÉí³µÁ¾	Road 1	531.1619715	82.98928757	-0.000201962	0.339128077	0.035294119	0	548.4703	990.3135	638.6	0.247	4.2872	1861	1.706108428	0.00394111	59.55367948	0.137569
39.01496282	×ÔÉí³µÁ¾	Road 1	531.5442491	82.99956665	-0.000205448	0.338680416	0.027450981	0	548.7934	990.3193	638.5836	0.247	4.2872	1862	1.390194542	0.003211349	59.57673002	0.137622246
39.03168365	×ÔÉí³µÁ¾	Road 1	531.9298235	83.01432266	-0.000209297	0.338192135	0.027450981	0	549.1166	990.3252	638.5671	0.2471	4.2872	1863	1.578718011	0.003646839	59.60312749	0.137683225
39.04833446	×ÔÉí³µÁ¾	Road 1	532.3138336	83.0251442	-0.000213194	0.336435467	0.027450981	0	549.6014	990.334	638.5423	0.2471	4.2872	1864	1.412032107	0.003261794	59.62663897	0.137737536
39.06505565	×ÔÉí³µÁ¾	Road 1	532.6995173	83.03602753	-0.00021747	0.335536748	0.027450981	0	549.9478	990.3398	638.5246	0.2475	4.2868	1865	1.412866806	0.003263722	59.65026379	0.137792109
39.082036	×ÔÉí³µÁ¾	Road 1	533.0912297	83.04687653	-0.000220463	0.335498303	0.019607844	0	550.2941	990.3457	638.507	0.248	4.2864	1866	1.404432527	0.003244239	59.67411154	0.137847198
39.09841703	×ÔÉí³µÁ¾	Road 1	533.4691632	83.05708694	-0.000224159	0.334364772	0.019607844	0	550.6175	990.3516	638.4904	0.2481	4.2865	1867	1.39336809	0.00321868	59.69693634	0.137899923
39.11495567	×ÔÉí³µÁ¾	Road 1	533.8508014	83.07195282	-0.000228238	0.333075613	0.019607844	0	551.1026	990.3604	638.4657	0.2481	4.2865	1868	1.591351928	0.003676023	59.72325515	0.137960719
39.13181579	×ÔÉí³µÁ¾	Road 1	534.2399278	83.08691483	-0.000232366	0.331954449	0.019607844	0	551.5878	990.3691	638.4409	0.248	4.2864	1869	1.583372903	0.003657591	59.749951	0.138022387
39.14834894	×ÔÉí³µÁ¾	Road 1	534.6215541	83.09696732	-0.000236193	0.332308829	0.019607844	0	551.9113	990.375	638.4243	0.2479	4.2863	1870	1.382916064	0.003194536	59.77281496	0.138075203
39.16501332	×ÔÉí³µÁ¾	Road 1	535.0062555	83.10691681	-0.000240416	0.331846654	0.019607844	0	552.2348	990.3809	638.4078	0.2479	4.2863	1871	1.375168705	0.00317664	59.79573129	0.138128139
39.18191192	×ÔÉí³µÁ¾	Road 1	535.3964101	83.11672897	-0.000243259	0.331611216	0.019607844	0	552.5584	990.3867	638.3914	0.2479	4.2862	1872	1.363515041	0.00314972	59.81877279	0.138181365
39.19840365	×ÔÉí³µÁ¾	Road 1	535.7772391	83.13162918	-0.000246124	0.330307275	0.019607844	0	552.9282	990.3936	638.3724	0.2477	4.2863	1873	1.595611997	0.003685864	59.84508719	0.138242151
39.21501414	×ÔÉí³µÁ¾	Road 1	536.1608629	83.1429863	-0.000247926	0.329777271	0.019607844	0	553.4138	990.4023	638.3477	0.2477	4.2863	1874	1.437908631	0.003321569	59.86897156	0.138297324
39.23189478	×ÔÉí³µÁ¾	Road 1	536.5507782	83.15411682	-0.00024865	0.329547584	0.019607844	0	553.7144	990.4072	638.3323	0.2482	4.2857	1875	1.420553418	0.003281478	59.89295142	0.138352718
39.24826591	×ÔÉí³µÁ¾	Road 1	536.9289823	83.16680603	-0.00024865	0.328830481	0.019607844	0	554.2	990.416	638.3075	0.2482	4.2857	1876	1.503892169	0.003473991	59.91757183	0.138409591
39.26494092	×ÔÉí³µÁ¾	Road 1	537.3142555	83.17740097	-0.00024865	0.328550696	0.019607844	0	554.5469	990.4229	638.2898	0.2476	4.2863	1877	1.403627149	0.003242379	59.94097732	0.138463658
39.28194399	×ÔÉí³µÁ¾	Road 1	537.7071539	83.18697968	-0.00024865	0.328563154	0.019607844	0	554.8708	990.4287	638.2733	0.2476	4.2863	1878	1.351979728	0.003123073	59.96396513	0.138516759
39.29829496	×ÔÉí³µÁ¾	Road 1	538.0850539	83.20240173	-0.00024865	0.328083664	0.019607844	0	555.241	990.4346	638.2544	0.2485	4.2854	1879	1.625251177	0.00375433	59.99053957	0.138578146
39.31503192	×ÔÉí³µÁ¾	Road 1	538.4719001	83.20786057	-0.00024865	0.327625453	0.019607844	0	555.5649	990.4404	638.2378	0.2485	4.2854	1880	1.18169578	0.002729717	60.01031755	0.138623834
39.33195325	×ÔÉí³µÁ¾	Road 1	538.8630924	83.22585068	-0.00024865	0.328234345	0.019607844	0	556.1666	990.4512	638.2071	0.2486	4.2852	1881	1.711893455	0.003954474	60.03928507	0.138690749
39.34829359	×ÔÉí³µÁ¾	Road 1	539.2408972	83.23557358	-0.00024865	0.327326447	0.019607844	0	556.4907	990.457	638.1906	0.2486	4.2852	1882	1.375375583	0.003177118	60.06175918	0.138742664
39.36507086	×ÔÉí³µÁ¾	Road 1	539.6288507	83.24548187	-0.00024865	0.32723698	0.019607844	0	556.8148	990.4629	638.174	0.2487	4.2852	1883	1.372304798	0.003170024	60.08478271	0.138795848
39.3816513	×ÔÉí³µÁ¾	Road 1	540.0123231	83.2608284	-0.00024865	0.326928258	0.019607844	0	557.3241	990.4727	638.1481	0.2485	4.2857	1884	1.613513224	0.003727216	60.11153546	0.138857647
39.39835453	×ÔÉí³µÁ¾	Road 1	540.3986799	83.27040024	-0.00024865	0.326707989	0.019607844	0	557.6483	990.4785	638.1315	0.2488	4.2856	1885	1.360015877	0.003141637	60.13425212	0.138910122
39.41494706	×ÔÉí³µÁ¾	Road 1	540.7825204	83.27997894	-0.00024865	0.32647875	0.019607844	0	557.9725	990.4844	638.115	0.2489	4.2856	1886	1.363187043	0.003148962	60.15687084	0.138962372
39.43174083	×ÔÉí³µÁ¾	Road 1	541.171087	83.29516068	-0.00024865	0.326418221	0.019607844	0	558.4821	990.4932	638.0889	0.2494	4.2851	1887	1.598529568	0.003692603	60.18371618	0.139024384
39.44837478	×ÔÉí³µÁ¾	Road 1	541.5560004	83.30481491	-0.00024865	0.326807439	0.019607844	0	558.8064	990.499	638.0723	0.2494	4.2851	1888	1.365737878	0.003154854	60.2064338	0.139076862
39.46501716	×ÔÉí³µÁ¾	Road 1	541.9411535	83.31446915	-0.00024865	0.326337934	0.019607844	0	559.1307	990.5049	638.0558	0.2494	4.2851	1889	1.365649708	0.003154651	60.22916146	0.139129363
39.48174825	×ÔÉí³µÁ¾	Road 1	542.32843	83.32961655	-0.00024865	0.32584849	0.019607844	0	559.6405	990.5137	638.0298	0.2498	4.2846	1890	1.600027996	0.003696065	60.25593167	0.139191202
39.49835765	×ÔÉí³µÁ¾	Road 1	542.712934	83.33925705	-0.00024865	0.325808555	0.011764706	0	559.965	990.5195	638.0132	0.2498	4.2846	1891	1.366201145	0.003155925	60.27862344	0.13924362
39.51493331	×ÔÉí³µÁ¾	Road 1	543.0967021	83.34898682	-0.00024865	0.325538933	0.011764706	0	560.2894	990.5254	637.9966	0.2498	4.2845	1892	1.371054694	0.003167136	60.30134959	0.139296118
39.53172488	×ÔÉí³µÁ¾	Road 1	543.485542	83.36465607	-0.00024865	0.324858099	0.011764706	0	560.8226	990.5352	637.9694	0.2497	4.2846	1893	1.62061121	0.003743612	60.3285622	0.139358979
39.5483603	×ÔÉí³µÁ¾	Road 1	543.8708101	83.37423477	-0.000249012	0.324398607	0	0	561.1472	990.541	637.9528	0.2497	4.2846	1894	1.363318103	0.003149265	60.35124157	0.139411368
39.56498472	×ÔÉí³µÁ¾	Road 1	544.2558708	83.38447266	-0.000250828	0.324358672	0	0	561.495	990.5479	637.9351	0.2491	4.2851	1895	1.392292706	0.003216196	60.37438763	0.139464835
39.5817554	×ÔÉí³µÁ¾	Road 1	544.6443858	83.39878922	-0.000250828	0.323449641	0	0	561.982	990.5566	637.9102	0.2491	4.285	1896	1.563867464	0.003612534	60.40061474	0.13952542
39.59940838	×ÔÉí³µÁ¾	Road 1	545.0533877	83.40839539	-0.000253019	0.323589623	0	0	562.3067	990.5625	637.8937	0.2491	4.285	1897	1.340952298	0.0030976	60.42428654	0.139580102
39.61492177	×ÔÉí³µÁ¾	Road 1	545.4128578	83.4177887	-0.000253386	0.323369771	0	0	562.6315	990.5684	637.8771	0.2491	4.2849	1898	1.385279878	0.003199997	60.44577693	0.139629745
39.63190688	×ÔÉí³µÁ¾	Road 1	545.8064974	83.43202286	-0.000255223	0.323309869	0	0	563.1187	990.5771	637.8522	0.2491	4.2849	1899	1.55310389	0.00358767	60.47215657	0.139690682
39.64832896	×ÔÉí³µÁ¾	Road 1	546.1871316	83.4415123	-0.00025633	0.323269933	0	0	563.4435	990.582	637.8356	0.2501	4.2839	1900	1.365650586	0.003154653	60.4945834	0.139742488
39.66498931	×ÔÉí³µÁ¾	Road 1	546.5733324	83.45102234	-0.000259297	0.323229998	0	0	563.7684	990.5879	637.819	0.2501	4.2838	1901	1.360704237	0.003143227	60.5172532	0.139794855
39.68194106	×ÔÉí³µÁ¾	Road 1	546.9663425	83.46253052	-0.000260789	0.323190063	0	0	564.1165	990.5947	637.8013	0.2496	4.2843	1902	1.438781346	0.003323585	60.54164307	0.139851195
39.69830303	×ÔÉí³µÁ¾	Road 1	547.3457374	83.47539825	-0.00026379	0.323979288	0	0	564.604	990.6035	637.7764	0.2496	4.2843	1903	1.516542548	0.003503213	60.56645669	0.139908515
39.7149872	×ÔÉí³µÁ¾	Road 1	547.7326474	83.4848877	-0.000265299	0.323090643	0	0	564.929	990.6094	637.7598	0.2496	4.2843	1904	1.359655924	0.003140805	60.58914142	0.139960917
39.73219848	×ÔÉí³µÁ¾	Road 1	548.131849	83.49908066	-0.000266814	0.322630912	0	0	565.2773	990.6152	637.742	0.2501	4.2839	1905	1.544438378	0.003567653	60.61572318	0.140022321
39.74827819	×ÔÉí³µÁ¾	Road 1	548.5048505	83.50924301	-0.000269479	0.322990388	0	0	565.765	990.624	637.7171	0.2501	4.2838	1906	1.4055921	0.003246918	60.6383247	0.14007453
39.76499829	×ÔÉí³µÁ¾	Road 1	548.8927538	83.51938477	-0.000271393	0.322531074	0	0	566.1133	990.6309	637.6993	0.2496	4.2844	1907	1.387367586	0.003204819	60.66152162	0.140128115
39.78230304	×ÔÉí³µÁ¾	Road 1	549.2942763	83.53089294	-0.000272931	0.323340088	0	0	566.4385	990.6367	637.6827	0.2496	4.2844	1908	1.429718186	0.003302649	60.68626253	0.140185266
39.79829588	×ÔÉí³µÁ¾	Road 1	549.6654127	83.54305344	-0.000274475	0.322431237	0	0	566.9263	990.6455	637.6578	0.2496	4.2843	1909	1.498709571	0.003462019	60.71023116	0.140240634
39.81500534	×ÔÉí³µÁ¾	Road 1	550.0532231	83.55250854	-0.000275249	0.322391301	0	0	567.2516	990.6514	637.6412	0.2496	4.2843	1910	1.358409222	0.003137925	60.73292945	0.140293067
39.83170601	×ÔÉí³µÁ¾	Road 1	550.4409014	83.5680336	-0.000276025	0.322750777	0	0	567.7861	990.6611	637.614	0.2495	4.2844	1911	1.621266796	0.003745126	60.76000568	0.140355613
39.8483022	×ÔÉí³µÁ¾	Road 1	550.826198	83.57745438	-0.000276413	0.321442366	0	0	568.1115	990.667	637.5974	0.2496	4.2844	1912	1.360020396	0.003141647	60.78257685	0.140407753
39.86495668	×ÔÉí³µÁ¾	Road 1	551.2128943	83.5875206	-0.000276413	0.321821988	0	0	568.4601	990.6729	637.5795	0.25	4.284	1913	1.386705147	0.003203289	60.8056717	0.140461102
39.88177355	×ÔÉí³µÁ¾	Road 1	551.6034273	83.60172729	-0.000276413	0.321362883	0	0	568.8088	990.6797	637.5618	0.2495	4.2845	1914	1.560530157	0.003604825	60.83191492	0.140521723
39.89836534	×ÔÉí³µÁ¾	Road 1	551.9887793	83.61162872	-0.000276413	0.320453644	0	0	569.2971	990.6885	637.5368	0.2496	4.2845	1915	1.381492453	0.003191248	60.85483636	0.140574672
39.91494065	×ÔÉí³µÁ¾	Road 1	552.3737944	83.62166748	-0.000276413	0.319564581	0	0	569.6459	990.6943	637.519	0.2501	4.284	1916	1.388038061	0.003206368	60.87784351	0.140627819
39.93196938	×ÔÉí³µÁ¾	Road 1	552.769389	83.63162384	-0.000276413	0.319524646	0	0	569.9948	990.7002	637.5012	0.2506	4.2836	1917	1.373016098	0.003171667	60.90122424	0.140681828
39.94831412	×ÔÉí³µÁ¾	Road 1	553.1491402	83.64186859	-0.000276413	0.28467381	0	0.011764706	570.3204	990.7061	637.4846	0.2506	4.2835	1918	1.403584763	0.003242281	60.92416546	0.140734822
39.96498582	×ÔÉí³µÁ¾	Road 1	553.5365092	83.64639359	-0.000276413	0.164071679	0	0.011764706	570.8088	990.7148	637.4597	0.2507	4.2835	1919	1.146777381	0.002649056	60.9432842	0.140778987
39.98195481	×ÔÉí³µÁ¾	Road 1	553.9307931	83.64803467	-0.000276413	0.179114535	0	0.011764706	571.1578	990.7217	637.4418	0.2502	4.284	1920	1.020505801	0.002357368	60.96060115	0.140818989
39.99832337	×ÔÉí³µÁ¾	Road 1	554.3111433	83.65185242	-0.000276413	0.240474343	0	0.011764706	571.4835	990.7275	637.4252	0.2503	4.284	1921	1.119232458	0.002585427	60.97892138	0.140861308
40.01498628	×ÔÉí³µÁ¾	Road 1	554.698366	83.65896606	-0.000276413	0.260821551	0	0.011764706	571.8557	990.7344	637.4062	0.2502	4.2841	1922	1.259318248	0.002909025	60.99990528	0.140909781
40.03218106	×ÔÉí³µÁ¾	Road 1	555.0979792	83.66535187	-0.000276413	0.215792909	0	0.011764706	572.2512	990.7412	637.386	0.2505	4.2838	1923	1.219240806	0.002816446	61.02086986	0.140958209
40.04827581	×ÔÉí³µÁ¾	Road 1	555.4720512	83.6707283	-0.000276413	0.199641347	0	0.011764706	572.8096	990.751	637.3575	0.2509	4.2835	1924	1.192308846	0.002754233	61.04005977	0.141002538
40.06496915	×ÔÉí³µÁ¾	Road 1	555.8600539	83.67468338	-0.000276413	0.226790428	0	0.011764706	573.1354	990.7578	637.3409	0.25	4.2844	1925	1.122123394	0.002592105	61.05879175	0.141045809
40.08226143	×ÔÉí³µÁ¾	Road 1	556.2620022	83.67973709	-0.000276413	0.238656521	0	0.011764706	573.4612	990.7637	637.3242	0.2501	4.2844	1926	1.162180691	0.002684637	61.07888851	0.141092232
40.0983833	×ÔÉí³µÁ¾	Road 1	556.6367792	83.68737946	-0.000276413	0.213574976	0	0.011764706	573.9964	990.7725	637.2969	0.251	4.2835	1927	1.293721265	0.002988496	61.09974572	0.141140413
40.11499123	×ÔÉí³µÁ¾	Road 1	557.0228721	83.69103928	-0.000276413	0.20592384	0	0.011764706	574.3223	990.7783	637.2803	0.2511	4.2835	1928	1.110307756	0.002564811	61.11818563	0.141183009
40.13218381	×ÔÉí³µÁ¾	Road 1	557.422575	83.69482269	-0.000276413	0.214824021	0	0.011764706	574.6481	990.7852	637.2637	0.2501	4.2844	1929	1.110123733	0.002564386	61.13727153	0.141227097
40.1482617	×ÔÉí³µÁ¾	Road 1	557.7963821	83.69916916	-0.000276413	0.225422114	0	0.011764706	574.9739	990.791	637.247	0.2502	4.2844	1930	1.146531121	0.002648487	61.15570532	0.141269679
40.16543412	×ÔÉí³µÁ¾	Road 1	558.1956698	83.70604935	-0.000276413	0.220487729	0	0.011764706	575.4628	990.7998	637.222	0.2503	4.2843	1931	1.240861982	0.002866391	61.17701393	0.141318902
40.18196764	×ÔÉí³µÁ¾	Road 1	558.5801201	83.71002502	-0.000276413	0.213066086	0	0.011764706	575.7887	990.8057	637.2054	0.2504	4.2842	1932	1.125028652	0.002598816	61.19561461	0.14136187
40.1982354	×ÔÉí³µÁ¾	Road 1	558.9584191	83.71628723	-0.000276413	0.215343654	0	0.011764706	576.3008	990.8145	637.1793	0.2509	4.2837	1933	1.229614591	0.00284041	61.21561768	0.141408077
40.21497822	×ÔÉí³µÁ¾	Road 1	559.3477844	83.72037277	-0.000276413	0.219808564	0	0.011764706	576.6268	990.8203	637.1627	0.2509	4.2836	1934	1.127703101	0.002604994	61.23449861	0.141451692
40.23191165	×ÔÉí³µÁ¾	Road 1	559.7416027	83.72467117	-0.000276413	0.219798595	0	0.011764706	576.9528	990.8262	637.146	0.251	4.2836	1935	1.134853061	0.002621511	61.25371557	0.141496083
40.24831723	×ÔÉí³µÁ¾	Road 1	560.1231746	83.73117371	-0.000276413	0.214244932	0	0.011764706	577.465	990.8359	637.1199	0.2505	4.284	1936	1.238039144	0.00285987	61.27402632	0.141543001
40.26490903	×ÔÉí³µÁ¾	Road 1	560.5090959	83.73514938	-0.000276413	0.214654341	0	0.011764706	577.791	990.8418	637.1032	0.2506	4.284	1937	1.124665049	0.002597976	61.29268654	0.141586106
40.28189268	×ÔÉí³µÁ¾	Road 1	560.9041506	83.73920059	-0.000276413	0.216342598	0	0.011764706	578.117	990.8477	637.0865	0.2507	4.2839	1938	1.12392246	0.002596261	61.31177484	0.1416302
40.29830743	×ÔÉí³µÁ¾	Road 1	561.2859926	83.74365005	-0.000276413	0.218020216	0	0.011764706	578.4663	990.8535	637.0687	0.2511	4.2834	1939	1.147506821	0.002650741	61.33061088	0.141673711
40.31493698	×ÔÉí³µÁ¾	Road 1	561.6728625	83.75039291	-0.000276413	0.215023994	0	0.011764706	579.002	990.8633	637.0414	0.2511	4.2834	1940	1.244849902	0.002875603	61.35131218	0.141721531
40.33170143	×ÔÉí³µÁ¾	Road 1	562.0628892	83.75439606	-0.000276413	0.214574665	0	0.011764706	579.3281	990.8691	637.0247	0.2512	4.2834	1941	1.124254301	0.002597027	61.37015968	0.141765069
40.34834381	×ÔÉí³µÁ¾	Road 1	562.4500946	83.75842667	-0.000276413	0.215833187	0	0.011764706	579.6542	990.875	637.0081	0.2512	4.2833	1942	1.126756188	0.002602807	61.38891158	0.141808386
40.36497409	×ÔÉí³µÁ¾	Road 1	562.8370389	83.7628006	-0.000276413	0.216242775	0	0.011764706	580.0035	990.8818	636.9902	0.2508	4.2838	1943	1.141870136	0.00263772	61.40790121	0.141852252
40.38163957	×ÔÉí³µÁ¾	Road 1	563.2248341	83.76974945	-0.000276413	0.215363488	0	0.011764706	580.5626	990.8916	636.9617	0.2511	4.2834	1944	1.253383067	0.002895315	61.42878944	0.141900504
40.39826546	×ÔÉí³µÁ¾	Road 1	563.6117266	83.77376633	-0.000276413	0.21449481	0	0.011764706	580.8888	990.8975	636.9451	0.2512	4.2833	1945	1.126483588	0.002602177	61.44751822	0.141943767
40.41497785	×ÔÉí³µÁ¾	Road 1	564.0006509	83.77777634	-0.000276413	0.215333506	0	0.011764706	581.215	990.9033	636.9284	0.2513	4.2833	1946	1.125320281	0.00259949	61.46632502	0.141987211
40.43229066	×ÔÉí³µÁ¾	Road 1	564.4035783	83.78412094	-0.000276413	0.214884266	0	0.011764706	581.7275	990.9131	636.9022	0.2508	4.2837	1947	1.216989675	0.002811246	61.48739454	0.142035881
40.44825638	×ÔÉí³µÁ¾	Road 1	564.7751722	83.78812408	-0.000275249	0.21443449	0	0.011764706	582.0537	990.9189	636.8856	0.2509	4.2837	1948	1.133236036	0.002617775	61.50548747	0.142077676
40.46494092	×ÔÉí³µÁ¾	Road 1	565.1635146	83.79212036	-0.000275249	0.215273887	0	0.011764706	582.3799	990.9248	636.869	0.251	4.2836	1949	1.125155696	0.00259911	61.52426017	0.142121041
40.48195242	×ÔÉí³µÁ¾	Road 1	565.5594876	83.7964119	-0.000275249	0.214404538	0	0.011764706	582.7295	990.9307	636.8511	0.2514	4.2831	1950	1.134432478	0.002620539	61.54355857	0.14216562
40.49825941	×ÔÉí³µÁ¾	Road 1	565.9390941	83.80355301	-0.000274862	0.213955045	0	0.011764706	583.3121	990.9414	636.8214	0.2513	4.2833	1951	1.268944112	0.002931261	61.56425122	0.14221342
40.51496667	×ÔÉí³µÁ¾	Road 1	566.3280277	83.80553741	-0.000274475	0.213945061	0	0.011764706	583.4752	990.9443	636.813	0.2513	4.2832	1952	1.03784209	0.002397415	61.58159072	0.142253475
40.53163068	×ÔÉí³µÁ¾	Road 1	566.7159875	83.81267166	-0.000274475	0.214334682	0	0.011764706	584.0579	990.9551	636.7833	0.2512	4.2834	1953	1.261955694	0.002915118	61.60261996	0.142302052
40.54827966	×ÔÉí³µÁ¾	Road 1	567.1036157	83.81664047	-0.000272931	0.213895425	0	0.011764706	584.3842	990.9609	636.7667	0.2512	4.2833	1954	1.124572783	0.002597763	61.62134295	0.142345302
40.56490115	×ÔÉí³µÁ¾	Road 1	567.4906222	83.82062302	-0.000272931	0.214734569	0	0.011764706	584.7106	990.9668	636.75	0.2513	4.2832	1955	1.125496024	0.002599896	61.64005037	0.142388516
40.58195151	×ÔÉí³µÁ¾	Road 1	567.8876346	83.82488708	-0.000271777	0.213865221	0	0.011764706	585.0602	990.9736	636.7321	0.2508	4.2837	1956	1.133132715	0.002617537	61.65937069	0.142433146
40.59836186	×ÔÉí³µÁ¾	Road 1	568.2697665	83.8296936	-0.000270627	0.214264825	0	0.011764706	585.4565	990.9805	636.7119	0.2512	4.2834	1957	1.164192013	0.002689284	61.67847549	0.142477278
40.61488951	×ÔÉí³µÁ¾	Road 1	568.6546506	83.8342392	-0.000269479	0.214244872	0	0.011764706	585.8295	990.9873	636.6929	0.2511	4.2834	1958	1.151295827	0.002659493	61.69750371	0.142521234
40.63155169	×ÔÉí³µÁ¾	Road 1	569.0426898	83.83905258	-0.000266814	0.213804021	0	0.011764706	586.2259	990.9941	636.6726	0.2515	4.2831	1959	1.161379863	0.002682787	61.71685482	0.142565935
40.64828021	×ÔÉí³µÁ¾	Road 1	569.4323044	83.84556885	-0.000264921	0.214203447	0	0.011764706	586.7621	991.0039	636.6453	0.2515	4.2831	1960	1.234371483	0.002851398	61.73750403	0.142613634
40.66496511	×ÔÉí³µÁ¾	Road 1	569.8209214	83.84951706	-0.00026379	0.2133338	0	0.011764706	587.0886	991.0098	636.6286	0.2515	4.283	1961	1.123629736	0.002595585	61.75625169	0.142656941
40.68219948	×ÔÉí³µÁ¾	Road 1	570.2223552	83.853479	-0.000262287	0.214172035	0	0.011764706	587.415	991.0156	636.6119	0.2516	4.2829	1962	1.11877908	0.00258438	61.77553314	0.142701482
40.69823375	×ÔÉí³µÁ¾	Road 1	570.5958574	83.85838852	-0.000260789	0.213722408	0	0.011764706	587.7881	991.0225	636.5929	0.2515	4.283	1963	1.174121216	0.00271222	61.79435931	0.14274497
40.71489189	×ÔÉí³µÁ¾	Road 1	570.9839085	83.86193161	-0.000259669	0.213712305	0	0.011764706	588.1147	991.0283	636.5762	0.2516	4.2829	1964	1.10640267	0.00255579	61.81278993	0.142787545
40.73217868	×ÔÉí³µÁ¾	Road 1	571.3866338	83.86815262	-0.000258925	0.213683292	0	0.011764706	588.6277	991.0381	636.55	0.2511	4.2834	1965	1.213127598	0.002802325	61.83376101	0.142835988
40.74827306	×ÔÉí³µÁ¾	Road 1	571.7615975	83.8720871	-0.000257811	0.213243768	0	0.011764706	588.9543	991.0439	636.5333	0.2511	4.2833	1966	1.12952601	0.002609205	61.85194003	0.142877981
40.76497189	×ÔÉí³µÁ¾	Road 1	572.1506724	83.87830124	-0.00025744	0.214071959	0	0.011764706	589.3275	991.0508	636.5143	0.251	4.2834	1967	1.222124473	0.002823108	61.87234808	0.142925124
40.78155343	×ÔÉí³µÁ¾	Road 1	572.5370337	83.88250351	-0.00025633	0.212353945	0	0.011764706	589.8173	991.0596	636.4893	0.2511	4.2832	1968	1.136129484	0.002624459	61.89118685	0.142968642
40.79828012	×ÔÉí³µÁ¾	Road 1	572.9267955	83.88644485	-0.00025633	0.214032024	0	0.011764706	590.1439	991.0654	636.4726	0.2511	4.2832	1969	1.123266332	0.002594745	61.90997538	0.143012043
40.81496869	×ÔÉí³µÁ¾	Road 1	573.3156886	83.89066772	-0.00025633	0.21274294	0	0.011764706	590.4938	991.0723	636.4548	0.2506	4.2837	1970	1.135927328	0.002623992	61.92893238	0.143055834
40.83192154	×ÔÉí³µÁ¾	Road 1	573.7107633	83.89553604	-0.00025633	0.213762015	0	0.011764706	590.8904	991.0791	636.4345	0.251	4.2833	1971	1.160718204	0.002681259	61.94860987	0.143101289
40.848219	×ÔÉí³µÁ¾	Road 1	574.0905854	83.9002121	-0.000255223	0.213129789	0	0.011764706	591.2871	991.0859	636.4142	0.2513	4.2829	1972	1.160586231	0.002680954	61.96752447	0.143144982
40.86488704	×ÔÉí³µÁ¾	Road 1	574.4790656	83.90479889	-0.000254855	0.213717744	0	0.011764706	591.6604	991.0928	636.3952	0.2512	4.283	1973	1.152124823	0.002661408	61.98672813	0.143189342
40.88157011	×ÔÉí³µÁ¾	Road 1	574.8679177	83.90946808	-0.000253386	0.213090867	0	0.011764706	592.0571	991.1006	636.3749	0.2506	4.2836	1974	1.155573763	0.002669375	62.00600665	0.143233875
40.89821652	×ÔÉí³µÁ¾	Road 1	575.2559452	83.91591568	-0.000253019	0.213060841	0	0.011764706	592.5938	991.1104	636.3475	0.2505	4.2836	1975	1.233557618	0.002849518	62.02654096	0.14328131
40.9149828	×ÔÉí³µÁ¾	Road 1	575.6467855	83.91993256	-0.000251922	0.21323064	0	0.011764706	592.9205	991.1162	636.3309	0.2505	4.2835	1976	1.126458474	0.002602119	62.04542748	0.143324937
40.93191513	×ÔÉí³µÁ¾	Road 1	576.0415146	83.92376404	-0.000250828	0.21261166	0	0.011764706	593.2473	991.1221	636.3142	0.2506	4.2834	1977	1.116851566	0.002579927	62.06433837	0.143368622
40.94832291	×ÔÉí³µÁ¾	Road 1	576.4240363	83.92833023	-0.000249012	0.213199973	0	0.011764706	593.6207	991.1289	636.2951	0.2505	4.2835	1978	1.154619056	0.00266717	62.08328312	0.143412384
40.96489015	×ÔÉí³µÁ¾	Road 1	576.8102955	83.9327179	-0.000247926	0.212989658	0	0.011764706	593.9941	991.1348	636.2761	0.2514	4.2826	1979	1.144905124	0.002644731	62.10225103	0.1434562
40.98155929	×ÔÉí³µÁ¾	Road 1	577.1989617	83.93943329	-0.000246484	0.213391036	0	0.011764706	594.5544	991.1455	636.2474	0.2508	4.2832	1980	1.245088964	0.002876156	62.1230056	0.143504143
40.9982288	×ÔÉí³µÁ¾	Road 1	577.5876481	83.94195328	-0.000245765	0.212961629	0	0.011764706	594.7645	991.1494	636.2368	0.2507	4.2833	1981	1.062545195	0.002454479	62.1407177	0.143545058
41.01489024	×ÔÉí³µÁ¾	Road 1	577.9761749	83.94809875	-0.000243616	0.213114277	0	0.011764706	595.1613	991.1563	636.2165	0.251	4.2829	1982	1.220508018	0.002819374	62.16105313	0.143592033
41.03215797	×ÔÉí³µÁ¾	Road 1	578.378861	83.95256882	-0.000243259	0.212486759	0	0.011764706	595.6516	991.165	636.1915	0.2511	4.2829	1983	1.140772318	0.002635184	62.18075167	0.143637536
41.04822669	×ÔÉí³µÁ¾	Road 1	578.7536036	83.9564827	-0.000241834	0.213317037	0	0.011764706	595.9785	991.1709	636.1747	0.2511	4.2828	1984	1.129713862	0.002609639	62.19890473	0.14367947
41.06495045	×ÔÉí³µÁ¾	Road 1	579.143642	83.9606781	-0.00024077	0.212881297	0	0.011764706	596.3287	991.1777	636.1569	0.2506	4.2833	1985	1.135047045	0.002621959	62.21788698	0.143723319
41.08156827	×ÔÉí³µÁ¾	Road 1	579.5312315	83.96540909	-0.00024077	0.213276535	0	0.011764706	596.7256	991.1846	636.1366	0.2509	4.283	1986	1.15963982	0.002678768	62.23715767	0.143767834
41.09823412	×ÔÉí³µÁ¾	Road 1	579.9199708	83.97182922	-0.00024077	0.211983934	0	0.011764706	597.2627	991.1943	636.1092	0.2509	4.283	1987	1.232656163	0.002847436	62.25770092	0.143815289
41.11495824	×ÔÉí³µÁ¾	Road 1	580.3100907	83.97639542	-0.00024077	0.213004798	0	0.011764706	597.6364	991.2012	636.0901	0.2508	4.2831	1988	1.15128843	0.002659476	62.27695521	0.143859767
41.1315592	×ÔÉí³µÁ¾	Road 1	580.6973552	83.9802063	-0.00024077	0.212375805	0	0.011764706	597.9633	991.207	636.0734	0.2509	4.2831	1989	1.119778397	0.002586688	62.29554461	0.143902708
41.14827929	×ÔÉí³µÁ¾	Road 1	581.0874168	83.98409271	-0.00024077	0.213205233	0	0.011764706	598.2903	991.2129	636.0568	0.251	4.2831	1990	1.121907773	0.002591607	62.31430301	0.14394604
41.16492681	×ÔÉí³µÁ¾	Road 1	581.4758059	83.98857651	-0.00024077	0.212765992	0	0.011764706	598.6639	991.2197	636.0377	0.2509	4.2832	1991	1.148731547	0.00265357	62.33342654	0.143990215
41.18189543	×ÔÉí³µÁ¾	Road 1	581.8717091	83.99338303	-0.00024077	0.212086648	0	0.011764706	599.061	991.2266	636.0174	0.2513	4.2828	1992	1.158885052	0.002677024	62.35309121	0.144035641
41.20009164	×ÔÉí³µÁ¾	Road 1	582.2962846	83.99942551	-0.000240416	0.212717399	0	0.011764706	599.575	991.2363	635.9911	0.2509	4.2833	1993	1.194379311	0.002759016	62.3748244	0.144085844
41.21486495	×ÔÉí³µÁ¾	Road 1	582.6410099	84.00357971	-0.000240416	0.212708458	0	0.011764706	599.9254	991.2422	635.9733	0.2515	4.2828	1994	1.157492733	0.002673808	62.3919244	0.144125345
41.23203627	×ÔÉí³µÁ¾	Road 1	583.0417112	84.00777512	-0.000240416	0.213108048	0	0.011764706	600.2758	991.249	635.9554	0.251	4.2832	1995	1.130768517	0.002612075	62.41134119	0.144170198
41.24822009	×ÔÉí³µÁ¾	Road 1	583.4193873	84.01193619	-0.000240416	0.21224843	0	0.011764706	600.6262	991.2549	635.9375	0.2516	4.2825	1996	1.140093112	0.002633615	62.42979225	0.14421282
41.26489217	×ÔÉí³µÁ¾	Road 1	583.8084782	84.01638565	-0.000240416	0.212648019	0	0.011764706	601	991.2617	635.9184	0.2515	4.2823	1997	1.147229418	0.0026501	62.44891894	0.144257003
[truncated: 2,645 more rows]
