# Supplementary material for: Influence of Landscape Design on Driving Behavior Based on Slope Illusion
Source: Hindawi journal article supplement (doi:10.1155/2022/6407145), 2022-01-12
Supplement: f1 [file 6407145.f1.zip › 3.txt]

CO2 emission report
0.3	0.028	0.056	0.00231
Time(s)	Vehicle Name	Road Name	Travelled Distance (m)	Speed(km/h)	Steering Wheel Angle(-1..1)	Acceleration(m/s^2)	Accelerate (0..1)	Brake (0..1)	X Pos(m)	Y Pos(m)	Z Pos(m)	Distance to the left border(m)	Distance to the right border(m)	Measurement Point Number	Gasoline Consumption(cc/sec)	Carbon Dioxide Emission(kg/sec)	Progressive Gasoline Consumption(cc)	Progressive Carbon Dioxide Emission(kg)
0	×ÔÉí³µÁ¾	Road 1	0	8.924433804	0	0.612050116	0	0	22.0273	977.1787	655.7373	3.8319	0.7022	1	0	0	0	0
0.01361976	×ÔÉí³µÁ¾	Road 1	0.033826295	8.941028309	0	0.610361576	0	0	22.0496	977.1787	655.7373	3.8324	0.7018	2	0.463598549	0.001070913	0.006314101	1.46E-05
0.063306813	×ÔÉí³µÁ¾	Road 1	0.158469553	9.030838108	0	0.605310798	0	0	22.1719	977.1816	655.7373	3.8316	0.7026	3	0.510604162	0.001179496	0.031684517	7.32E-05
0.130019299	×ÔÉí³µÁ¾	Road 1	0.327904442	9.143199921	0	0.598586619	0	0	22.3284	977.1846	655.7373	3.8316	0.7027	4	0.503379122	0.001162806	0.06526619	0.000150765
0.146616229	×ÔÉí³µÁ¾	Road 1	0.37026385	9.188077354	0	0.59563601	0	0	22.3921	977.1855	655.7373	3.8317	0.7025	5	0.585641397	0.001352832	0.074986039	0.000173218
0.163333755	×ÔÉí³µÁ¾	Road 1	0.413047197	9.213088417	0	0.593965709	0	0	22.4278	977.1855	655.7373	3.8324	0.7018	6	0.49061394	0.001133318	0.08318789	0.000192164
0.179927385	×ÔÉí³µÁ¾	Road 1	0.455636351	9.239747429	0	0.590595186	0	0	22.4663	977.1865	655.7373	3.8321	0.7021	7	0.499964599	0.001154918	0.091484118	0.000211328
0.196655175	×ÔÉí³µÁ¾	Road 1	0.498684794	9.264487267	0	0.58809489	0	0	22.5023	977.1875	655.7373	3.8318	0.7025	8	0.490310196	0.001132617	0.099685924	0.000230274
0.213275931	×ÔÉí³µÁ¾	Road 1	0.541644173	9.304857731	0	0.584307373	0	0	22.5616	977.1885	655.7373	3.8319	0.7024	9	0.567262479	0.001310376	0.109114255	0.000252054
0.263300948	×ÔÉí³µÁ¾	Road 1	0.671884504	9.372614193	0	0.578424573	0	0	22.6627	977.1904	655.7373	3.8318	0.7025	10	0.482209292	0.001113903	0.133236783	0.000307777
0.279926102	×ÔÉí³µÁ¾	Road 1	0.715398226	9.422432899	0	0.573782504	0	0	22.7384	977.1914	655.7373	3.8322	0.7021	11	0.616647838	0.001424457	0.143488648	0.000331459
0.296628966	×ÔÉí³µÁ¾	Road 1	0.759226164	9.446318722	0	0.571255147	0	0	22.7751	977.1924	655.7373	3.8319	0.7024	12	0.490065164	0.001132051	0.15167414	0.000350367
0.313306905	×ÔÉí³µÁ¾	Road 1	0.803098822	9.470089531	0	0.569144964	0	0	22.8119	977.1924	655.7373	3.8325	0.7017	13	0.49015555	0.001132259	0.159848924	0.000369251
0.330163722	×ÔÉí³µÁ¾	Road 1	0.847615889	9.50721817	0	0.56579423	0	0	22.8699	977.1943	655.7373	3.8316	0.7026	14	0.554558888	0.001281031	0.169197022	0.000390845
0.346591303	×ÔÉí³µÁ¾	Road 1	0.891106597	9.530712605	0	0.56494242	0	0	22.9069	977.1943	655.7373	3.8323	0.702	15	0.491778369	0.001136008	0.177275751	0.000409507
0.363403767	×ÔÉí³µÁ¾	Road 1	0.935733252	9.555764866	0	0.561583638	0	0	22.9466	977.1953	655.7373	3.832	0.7022	16	0.497214829	0.001148566	0.185635158	0.000428817
0.380625675	×ÔÉí³µÁ¾	Road 1	0.981613449	9.590616417	0	0.558211207	0	0	23.0025	977.1963	655.7373	3.8321	0.7022	17	0.542014935	0.001252055	0.194969689	0.00045038
0.396611555	×ÔÉí³µÁ¾	Road 1	1.024252133	9.602177811	0	0.556929648	0	0	23.0211	977.1963	655.7373	3.8324	0.7019	18	0.434662004	0.001004069	0.201918143	0.000466431
0.413238542	×ÔÉí³µÁ¾	Road 1	1.068760287	9.636704063	0	0.553992391	0	0	23.0773	977.1973	655.7373	3.8325	0.7018	19	0.547575176	0.001264899	0.211022669	0.000487462
0.429909516	×ÔÉí³µÁ¾	Road 1	1.113492203	9.659597683	0	0.551872015	0	0	23.1148	977.1982	655.7373	3.8322	0.7021	20	0.489631553	0.001131049	0.219185304	0.000506318
0.446618611	×ÔÉí³µÁ¾	Road 1	1.158499926	9.696982098	0	0.548069596	0	0	23.1766	977.1992	655.7373	3.8323	0.702	21	0.562553502	0.001299499	0.228585064	0.000528031
0.463263193	×ÔÉí³µÁ¾	Road 1	1.203393673	9.709915924	0	0.547251284	0	0	23.1955	977.2002	655.7373	3.8317	0.7026	22	0.440683402	0.001017979	0.235920055	0.000544975
0.479906308	×ÔÉí³µÁ¾	Road 1	1.248484092	9.753312778	0	0.543028772	0	0	23.2711	977.2012	655.7373	3.8321	0.7022	23	0.595150467	0.001374798	0.245825213	0.000567856
0.496563353	×ÔÉí³µÁ¾	Road 1	1.29366402	9.764501667	0	0.542188585	0	0	23.2901	977.2012	655.7373	3.8324	0.7019	24	0.432596554	0.000999298	0.253030993	0.000584502
0.513298107	×ÔÉí³µÁ¾	Road 1	1.339187951	9.793161392	0	0.539648294	0	0	23.339	977.2021	655.7373	3.8323	0.702	25	0.520897067	0.001203272	0.261748077	0.000604638
0.529904201	×ÔÉí³µÁ¾	Road 1	1.384493335	9.821658897	0	0.537116587	0	0	23.388	977.2031	655.7373	3.8323	0.7021	26	0.521838337	0.001205447	0.270413773	0.000624656
0.546603033	×ÔÉí³µÁ¾	Road 1	1.430161298	9.845279503	0	0.535016179	0	0	23.429	977.2041	655.7373	3.832	0.7023	27	0.49678	0.001147562	0.278709419	0.000643819
0.563274006	×ÔÉí³µÁ¾	Road 1	1.475876361	9.871902466	0	0.53247571	0	0	23.4756	977.2051	655.7373	3.8319	0.7024	28	0.512839216	0.001184659	0.287258948	0.000663568
0.57991309	×ÔÉí³µÁ¾	Road 1	1.521626438	9.898398399	0	0.530346692	0	0	23.5222	977.2061	655.7373	3.8318	0.7026	29	0.513021125	0.001185079	0.295795149	0.000683287
0.596595426	×ÔÉí³µÁ¾	Road 1	1.56761764	9.924768162	0	0.528666437	0	0	23.569	977.207	655.7373	3.8316	0.7027	30	0.512588501	0.001184079	0.304346323	0.00070304
0.613252838	×ÔÉí³µÁ¾	Road 1	1.613654374	9.949459934	0	0.526124775	0	0	23.6132	977.207	655.7373	3.8324	0.7019	31	0.504681656	0.001165815	0.312753013	0.000722459
0.629953869	×ÔÉí³µÁ¾	Road 1	1.659982504	9.986285591	0	0.523147285	0	0	23.6796	977.209	655.7373	3.8317	0.7027	32	0.567613859	0.001311188	0.32223275	0.000744358
0.646583422	×ÔÉí³µÁ¾	Road 1	1.70621098	10.00763597	0	0.521453917	0	0	23.7185	977.209	655.7373	3.8324	0.702	33	0.488756214	0.001129027	0.330360547	0.000763133
0.663239733	×ÔÉí³µÁ¾	Road 1	1.752612195	10.02889366	0	0.519756734	0	0	23.7575	977.21	655.7373	3.8321	0.7022	34	0.488497524	0.001128429	0.338497114	0.000781928
0.679903376	×ÔÉí³µÁ¾	Road 1	1.799138791	10.05156841	0	0.517636359	0	0	23.7993	977.2109	655.7373	3.8319	0.7025	35	0.49624608	0.001146328	0.346766382	0.00080103
0.696623835	×ÔÉí³µÁ¾	Road 1	1.845991538	10.08763533	0	0.5146842	0	0	23.8664	977.2119	655.7373	3.8322	0.7022	36	0.566168825	0.00130785	0.356232984	0.000822898
0.713308737	×ÔÉí³µÁ¾	Road 1	1.892841577	10.10854797	0	0.512992561	0	0	23.9057	977.2129	655.7373	3.8319	0.7025	37	0.488001974	0.001127285	0.36437525	0.000841707
0.729896503	×ÔÉí³µÁ¾	Road 1	1.939514766	10.12936192	0	0.510443449	0	0	23.945	977.2129	655.7373	3.8326	0.7018	38	0.488511338	0.001128461	0.372478561	0.000860425
0.746620261	×ÔÉí³µÁ¾	Road 1	1.986666862	10.15008402	0	0.508741796	0	0	23.9845	977.2139	655.7373	3.8323	0.702	39	0.487522407	0.001126177	0.380631768	0.000879259
0.763315427	×ÔÉí³µÁ¾	Road 1	2.033854475	10.17512512	0	0.507054687	0	0	24.0325	977.2148	655.7373	3.8322	0.7021	40	0.510868669	0.001180107	0.389160805	0.000898961
0.779920421	×ÔÉí³µÁ¾	Road 1	2.080949301	10.21026421	0	0.504092336	0	0	24.1004	977.2158	655.7373	3.8325	0.7019	41	0.565816535	0.001307036	0.398556185	0.000920665
0.79656207	×ÔÉí³µÁ¾	Road 1	2.128242305	10.23064556	0	0.502402067	0	0	24.1402	977.2168	655.7373	3.8322	0.7022	42	0.487744954	0.001126691	0.406673065	0.000939415
0.813216915	×ÔÉí³µÁ¾	Road 1	2.175666676	10.25093508	0	0.500261664	0	0	24.18	977.2178	655.7373	3.832	0.7024	43	0.487544099	0.001126227	0.414793037	0.000958172
0.829888622	×ÔÉí³µÁ¾	Road 1	2.223239267	10.27257299	0	0.498573333	0	0	24.2227	977.2188	655.7373	3.8318	0.7026	44	0.494996379	0.001143442	0.423045472	0.000977235
0.846593319	×ÔÉí³µÁ¾	Road 1	2.271019203	10.29697037	0	0.496459842	0	0	24.2713	977.2197	655.7373	3.8317	0.7027	45	0.509898742	0.001177866	0.431563175	0.000996911
0.863307913	×ÔÉí³µÁ¾	Road 1	2.318933537	10.31982021	0	0.494762719	0	0	24.3171	977.2197	655.7373	3.8325	0.7019	46	0.502049632	0.001159735	0.439954731	0.001016295
0.880027638	×ÔÉí³µÁ¾	Road 1	2.367020854	10.35389843	0	0.49178037	0	0	24.386	977.2217	655.7373	3.8318	0.7026	47	0.56260491	0.001299617	0.449361331	0.001038025
0.913246056	×ÔÉí³µÁ¾	Road 1	2.462833054	10.38351431	0	0.488809943	0	0	24.4465	977.2227	655.7373	3.832	0.7025	48	0.460648985	0.001064099	0.464663361	0.001073372
0.929943789	×ÔÉí³µÁ¾	Road 1	2.511176185	10.42268915	0	0.486271381	0	0	24.51	977.2236	655.7373	3.8321	0.7023	49	0.591989184	0.001367495	0.474548238	0.001096206
0.946609631	×ÔÉí³µÁ¾	Road 1	2.559523511	10.44353914	0	0.483727753	0	0	24.5709	977.2246	655.7373	3.8323	0.7022	50	0.494026615	0.001141201	0.482781608	0.001115226
0.963261543	×ÔÉí³µÁ¾	Road 1	2.607964809	10.47259111	0	0.482870847	0	0	24.6319	977.2256	655.7373	3.8324	0.7021	51	0.539133208	0.001245398	0.491759207	0.001135964
0.979950112	×ÔÉí³µÁ¾	Road 1	2.656602134	10.49187469	0	0.48073855	0	0	24.6726	977.2266	655.7373	3.8322	0.7023	52	0.486276651	0.001123299	0.499874468	0.00115471
0.996615954	×ÔÉí³µÁ¾	Road 1	2.705262126	10.51107845	0	0.479040205	0	0	24.7135	977.2275	655.7373	3.8319	0.7025	53	0.486326505	0.001123414	0.507979509	0.001173433
1.013341178	×ÔÉí³µÁ¾	Road 1	2.754234901	10.541084	0	0.476486593	0	0	24.7778	977.2285	655.7373	3.8321	0.7024	54	0.545182165	0.001259371	0.517097803	0.001194496
1.029898885	×ÔÉí³µÁ¾	Road 1	2.80276713	10.55194502	0	0.475637764	0	0	24.8012	977.2285	655.7373	3.8325	0.7019	55	0.441855677	0.001020687	0.52441392	0.001211396
1.046626309	×ÔÉí³µÁ¾	Road 1	2.851922433	10.57898083	0	0.473087281	0	0	24.8599	977.2295	655.7373	3.8326	0.7018	56	0.529855647	0.001223967	0.53327704	0.00123187
1.063261727	×ÔÉí³µÁ¾	Road 1	2.900906848	10.60050888	0	0.471787125	0	0	24.907	977.2305	655.7373	3.8325	0.702	57	0.500880539	0.001157034	0.541609397	0.001251118
1.079897877	×ÔÉí³µÁ¾	Road 1	2.950023399	10.6286356	0	0.469665527	0	0	24.9689	977.2314	655.7373	3.8327	0.7018	58	0.537756419	0.001242217	0.550555593	0.001271783
1.096599275	×ÔÉí³µÁ¾	Road 1	2.999425201	10.64859896	0	0.466676325	0	0	25.0132	977.2324	655.7373	3.8325	0.702	59	0.492717711	0.001138178	0.558784668	0.001290793
1.130056321	×ÔÉí³µÁ¾	Road 1	3.098718572	10.68403158	0	0.459893882	0	0	25.0932	977.2344	655.7373	3.832	0.7025	60	0.480719005	0.001110461	0.574868106	0.001327945
1.179974671	×ÔÉí³µÁ¾	Road 1	3.247700443	10.74424009	0	0.449282169	0	0	25.233	977.2363	655.7373	3.8326	0.7019	61	0.495244367	0.001144014	0.599589887	0.001385053
1.196534945	×ÔÉí³µÁ¾	Road 1	3.297286008	10.77929249	0	0.443764418	0	0	25.3167	977.2383	655.7373	3.8321	0.7024	62	0.580694083	0.001341403	0.60920634	0.001407267
1.213221314	×ÔÉí³µÁ¾	Road 1	3.347335086	10.79783621	0	0.440790862	0	0	25.3617	977.2393	655.7373	3.832	0.7025	63	0.487595562	0.001126346	0.61734254	0.001426061
1.229983193	×ÔÉí³µÁ¾	Road 1	3.397690537	10.81499376	0	0.437813401	0	0	25.4037	977.2393	655.7373	3.8327	0.7018	64	0.479709892	0.00110813	0.625383379	0.001444636
1.264738948	×ÔÉí³µÁ¾	Road 1	3.502522495	10.85849104	0	0.431009203	0	0	25.5121	977.2412	655.7373	3.8328	0.7018	65	0.501660193	0.001158835	0.642818958	0.001484912
1.281379864	×ÔÉí³µÁ¾	Road 1	3.552786706	10.87387018	0.023461083	0.332261503	0	0.011764706	25.5573	977.2422	655.7373	3.8326	0.7019	66	0.47135958	0.001088841	0.650662813	0.001503031
1.296536594	×ÔÉí³µÁ¾	Road 1	3.598631664	10.88901415	-0.003310272	0.30291599	0	0.011764706	25.6178	977.2432	655.7373	3.8327	0.7018	67	0.478650298	0.001105682	0.657917586	0.00151979
1.330029929	×ÔÉí³µÁ¾	Road 1	3.700172351	10.91400633	-0.003334734	0.304590732	0	0.011764706	25.7026	977.2451	655.7373	3.8323	0.7022	68	0.455185114	0.001051478	0.673163254	0.001555007
1.347364736	×ÔÉí³µÁ¾	Road 1	3.752779197	10.92510853	-0.003388149	0.304031044	0	0.011764706	25.7662	977.2461	655.7373	3.8325	0.7021	69	0.445410787	0.001028899	0.680884364	0.001572843
1.363286469	×ÔÉí³µÁ¾	Road 1	3.801146546	10.93614979	-0.003637746	0.302712768	0	0.011764706	25.8118	977.2471	655.7373	3.8323	0.7022	70	0.450565756	0.001040807	0.688058152	0.001589414
1.380029288	×ÔÉí³µÁ¾	Road 1	3.852072769	10.95003204	-0.003833903	0.301404357	0	0.011764706	25.8543	977.248	655.7373	3.8321	0.7024	71	0.463579269	0.001070868	0.695819775	0.001607344
1.396591761	×ÔÉí³µÁ¾	Road 1	3.902480485	10.9565629	-0.004006887	0.299657077	0	0.011764706	25.8969	977.248	655.7373	3.8329	0.7016	72	0.422542976	0.000976074	0.702818132	0.00162351
1.413327982	×ÔÉí³µÁ¾	Road 1	3.953497256	10.97382603	-0.004201663	0.297056764	0	0.011764706	25.97	977.25	655.7373	3.8323	0.7023	73	0.483096274	0.001115952	0.710903338	0.001642187
1.446584521	×ÔÉí³µÁ¾	Road 1	4.055023714	10.99017677	-0.004437171	0.295324832	0	0.011764706	26.0401	977.251	655.7373	3.8326	0.702	74	0.432140259	0.000998244	0.725274828	0.001675385
1.463196113	×ÔÉí³µÁ¾	Road 1	4.105823468	11.00912647	-0.004678758	0.292303085	0	0.011764706	26.1226	977.2529	655.7373	3.8321	0.7024	75	0.494064922	0.00114129	0.733482032	0.001694343
1.479979619	×ÔÉí³µÁ¾	Road 1	4.157194234	11.01883907	-0.005323531	0.290978044	0	0.011764706	26.1655	977.2529	655.7373	3.8329	0.7016	76	0.440784151	0.001018211	0.740879936	0.001711433
1.49657435	×ÔÉí³µÁ¾	Road 1	4.208041497	11.03061934	-0.00564232	0.380041331	0	0	26.2083	977.2539	655.7373	3.8327	0.7018	77	0.453427805	0.001047418	0.748404448	0.001728814
1.513329998	×ÔÉí³µÁ¾	Road 1	4.259505441	11.05717878	-0.00596455	0.411146879	0	0	26.2819	977.2559	655.7373	3.8321	0.7025	78	0.537284372	0.001241127	0.757406996	0.00174961
1.529896136	×ÔÉí³µÁ¾	Road 1	4.310459024	11.07276134	-0.006348914	0.404467851	0	0	26.325	977.2568	655.7373	3.8319	0.7027	79	0.476067263	0.001099715	0.765293592	0.001767828
1.546530821	×ÔÉí³µÁ¾	Road 1	4.361694153	11.08806496	-0.0067168	0.400738955	0.011764706	0	26.368	977.2568	655.7373	3.8327	0.7019	80	0.474334913	0.001095714	0.773184004	0.001786055
1.563296366	×ÔÉí³µÁ¾	Road 1	4.413438229	11.11080322	-0.00709525	0.399040431	0.019607844	0	26.4328	977.2588	655.7373	3.8319	0.7027	81	0.516510236	0.001193139	0.78184358	0.001806059
1.579924819	×ÔÉí³µÁ¾	Road 1	4.464829255	11.12597122	-0.007480648	0.400301218	0.027450981	0	26.476	977.2598	655.7373	3.8317	0.7028	82	0.474181163	0.001095358	0.789728479	0.001824273
1.597377291	×ÔÉí³µÁ¾	Road 1	4.518877801	11.14883738	-0.007897897	0.401943803	0.027450981	0	26.541	977.2607	655.7373	3.8319	0.7026	83	0.512818436	0.001184611	0.798678428	0.001844947
1.613222413	×ÔÉí³µÁ¾	Road 1	4.568020694	11.16522846	-0.008281564	0.402755797	0.035294119	0	26.5874	977.2617	655.7373	3.8321	0.7028	84	0.486581701	0.001124004	0.806388375	0.001862757
1.630023515	×ÔÉí³µÁ¾	Road 1	4.620195087	11.17949438	-0.008696806	0.404417902	0.043137256	0	26.6278	977.2627	655.7373	3.8319	0.7021	85	0.468933904	0.001083237	0.814266981	0.001880957
1.646591486	×ÔÉí³µÁ¾	Road 1	4.671752331	11.20270386	-0.009049946	0.406941652	0.043137256	0	26.6931	977.2637	655.7373	3.8321	0.7019	86	0.522614195	0.001207239	0.822925638	0.001900958
1.663200145	×ÔÉí³µÁ¾	Road 1	4.723472025	11.21158476	-0.009396204	0.407335341	0.050980393	0	26.7148	977.2646	655.7373	3.8315	0.7025	87	0.438980714	0.001014045	0.830216519	0.0019178
1.679903376	×ÔÉí³µÁ¾	Road 1	4.775595011	11.23391962	-0.00977209	0.410280854	0.05882353	0	26.7803	977.2656	655.7373	3.8317	0.7023	88	0.517061554	0.001194412	0.838853117	0.001937751
1.696601108	×ÔÉí³µÁ¾	Road 1	4.827811135	11.25769901	-0.010046631	0.416216731	0.074509807	0	26.8459	977.2676	655.7373	3.831	0.7021	89	0.525963356	0.001214975	0.847635512	0.001958038
1.713187407	×ÔÉí³µÁ¾	Road 1	4.879753025	11.27381115	-0.010295905	0.420451373	0.082352944	0	26.8897	977.2686	655.7373	3.8308	0.7023	90	0.482260333	0.001114021	0.855634427	0.001976516
1.729989242	×ÔÉí³µÁ¾	Road 1	4.932446096	11.29013958	-0.010558079	0.424237758	0.082352944	0	26.9335	977.2695	655.7373	3.8306	0.7024	91	0.482563656	0.001114722	0.863742381	0.001995245
1.746515792	×ÔÉí³µÁ¾	Road 1	4.984395032	11.31610422	-0.010762066	0.428062797	0.082352944	0	27.0026	977.2715	655.7374	3.8299	0.7022	92	0.541479923	0.001250819	0.872691176	0.002015917
1.763281704	×ÔÉí³µÁ¾	Road 1	5.037179402	11.33393383	-0.010941567	0.428674906	0.090196081	0	27.0498	977.2725	655.7374	3.8298	0.7023	93	0.492232656	0.001137057	0.880943906	0.00203498
1.779856273	×ÔÉí³µÁ¾	Road 1	5.08943846	11.35067854	-0.011091149	0.43187803	0.090196081	0	27.0939	977.2734	655.7374	3.8286	0.7025	94	0.487309169	0.001125684	0.889020845	0.002053638
1.796529813	×ÔÉí³µÁ¾	Road 1	5.14208742	11.36748762	-0.01122372	0.432930946	0.098039217	0	27.138	977.2744	655.7374	3.8285	0.7027	95	0.48737671	0.00112584	0.89714714	0.00207241
1.81329939	×ÔÉí³µÁ¾	Road 1	5.195174886	11.39652328	-0.011343472	0.436781883	0.105882354	0	27.2139	977.2764	655.7374	3.8279	0.7023	96	0.558950136	0.001291175	0.906520498	0.002094062
1.829884223	×ÔÉí³µÁ¾	Road 1	5.247716819	11.40505657	-0.011431519	0.437614232	0.105882354	0	27.2361	977.2764	655.7374	3.8283	0.7019	97	0.439399605	0.001015013	0.913807867	0.002110896
1.846522207	×ÔÉí³µÁ¾	Road 1	5.300551854	11.43204174	-0.01153871	0.440995604	0.113725491	0	27.3058	977.2783	655.7374	3.8276	0.7025	98	0.548963193	0.001268105	0.922941507	0.002131995
1.863208576	×ÔÉí³µÁ¾	Road 1	5.353661043	11.45803986	-0.011585524	0.443555743	0.113725491	0	27.3726	977.2803	655.7374	3.8268	0.7023	99	0.543220839	0.00125484	0.932005891	0.002152934
1.879990616	×ÔÉí³µÁ¾	Road 1	5.407150107	11.47420864	-0.011632464	0.444836468	0.121568628	0	27.414	977.2813	655.7374	3.8266	0.7025	100	0.484712828	0.001119687	0.940140361	0.002171724
1.896516067	×ÔÉí³µÁ¾	Road 1	5.45990167	11.49170609	-0.011693675	0.446717888	0.129411772	0	27.4586	977.2822	655.7374	3.8265	0.7017	101	0.494452196	0.001142185	0.948311407	0.002190599
1.913175311	×ÔÉí³µÁ¾	Road 1	5.513208824	11.51947575	-0.0117551	0.451619655	0.137254909	0	27.5289	977.2842	655.7374	3.8258	0.7024	102	0.555339703	0.001282835	0.957562946	0.00221197
1.929860214	×ÔÉí³µÁ¾	Road 1	5.566680861	11.53733625	-0.011802496	0.454762578	0.145098045	0	27.5737	977.2852	655.7374	3.8256	0.7026	103	0.496382762	0.001146644	0.965845044	0.002231102
1.946616595	×ÔÉí³µÁ¾	Road 1	5.620508177	11.56445017	-0.011840506	0.45941186	0.145098045	0	27.6411	977.2871	655.7374	3.8249	0.7023	104	0.551471032	0.001273898	0.975085703	0.002252448
1.963254212	×ÔÉí³µÁ¾	Road 1	5.674038222	11.58267803	-0.011888131	0.461082369	0.145098045	0	27.6861	977.2881	655.7374	3.8237	0.7025	105	0.499665852	0.001154228	0.983398952	0.002271652
1.979872768	×ÔÉí³µÁ¾	Road 1	5.727591382	11.60097027	-0.011955021	0.461913764	0.145098045	0	27.7312	977.2891	655.7374	3.8236	0.7017	106	0.500494931	0.001156143	0.991716455	0.002290865
1.996713458	×ÔÉí³µÁ¾	Road 1	5.781988848	11.62843609	-0.012051012	0.461898595	0.145098045	0	27.7989	977.291	655.7374	3.8229	0.7024	107	0.554145341	0.001280076	1.001048645	0.002312422
2.013184292	×ÔÉí³µÁ¾	Road 1	5.835275407	11.64674549	-0.01222509	0.461881101	0.145098045	0	27.8441	977.292	655.7374	3.8227	0.7026	108	0.502383965	0.001160507	1.009323328	0.002331537
2.029935175	×ÔÉí³µÁ¾	Road 1	5.889553116	11.66504202	-0.012612952	0.461439937	0.145098045	0	27.8895	977.2939	655.7374	3.8216	0.7027	109	0.500752649	0.001156739	1.017711377	0.002350913
2.046559229	×ÔÉí³µÁ¾	Road 1	5.943546546	11.69247522	-0.013019063	0.461400121	0.152941182	0	27.9576	977.2949	655.7374	3.8218	0.7025	110	0.557493259	0.001287809	1.026979175	0.002372322
2.063226171	×ÔÉí³µÁ¾	Road 1	5.997764333	11.710849	-0.013444149	0.464295	0.160784319	0	28.0031	977.2969	655.7374	3.8207	0.7026	111	0.502565949	0.001160927	1.035355412	0.002391671
2.079997214	×ÔÉí³µÁ¾	Road 1	6.052413408	11.73073511	-0.014010992	0.468871862	0.168627456	0	28.0519	977.2979	655.7374	3.8206	0.7027	112	0.51134369	0.001181204	1.04393118	0.002411481
2.096517533	×ÔÉí³µÁ¾	Road 1	6.106381993	11.76048145	-0.014769208	0.480855793	0.200000003	0	28.1236	977.2998	655.7375	3.82	0.7034	113	0.574239886	0.001326494	1.053417806	0.002433395
2.113222597	×ÔÉí³µÁ¾	Road 1	6.161045037	11.78007832	-0.01548025	0.494446069	0.215686277	0	28.1694	977.3008	655.7375	3.8198	0.7025	114	0.510949697	0.001180294	1.061953253	0.002453112
2.129885506	×ÔÉí³µÁ¾	Road 1	6.215671292	11.80193167	-0.016301889	0.512000561	0.23137255	0	28.2185	977.3027	655.7375	3.8187	0.7036	115	0.525431139	0.001213746	1.070708464	0.002473337
2.146580673	×ÔÉí³µÁ¾	Road 1	6.270561375	11.83601847	-0.017200859	0.545041263	0.247058824	0	28.2907	977.3047	655.7375	3.8171	0.7033	116	0.600597414	0.00138738	1.080735538	0.002496499
2.163260444	×ÔÉí³µÁ¾	Road 1	6.325484448	11.85406351	-0.017955929	0.555830836	0.270588249	0	28.3137	977.3047	655.7375	3.8175	0.7028	117	0.502941568	0.001161795	1.089124488	0.002515878
2.179922253	×ÔÉí³µÁ¾	Road 1	6.380476472	11.88173962	-0.018713411	0.593672216	0.278431386	0	28.3796	977.3066	655.7375	3.8168	0.7036	118	0.562774366	0.001300009	1.098501328	0.002537538
2.19656207	×ÔÉí³µÁ¾	Road 1	6.435513952	11.90727854	-0.019320004	0.614984989	0.294117659	0	28.4259	977.3086	655.7375	3.8157	0.7047	119	0.55037822	0.001271374	1.10765952	0.002558693
2.213248072	×ÔÉí³µÁ¾	Road 1	6.490899672	11.9494523	-0.01974497	0.646800697	0.309803933	0	28.4987	977.3105	655.7375	3.815	0.7044	120	0.653485967	0.001509553	1.118563589	0.002583882
2.230053206	×ÔÉí³µÁ¾	Road 1	6.546860692	11.98798428	-0.02006775	0.66829741	0.31764707	0	28.5453	977.3115	655.7375	3.8149	0.7035	121	0.630399052	0.001456222	1.129157529	0.002608354
2.247255319	×ÔÉí³µÁ¾	Road 1	6.604306682	12.02210197	-0.020353053	0.704543591	0.349019617	0	28.6152	977.3135	655.7375	3.8142	0.7042	122	0.599271735	0.001384318	1.139466269	0.002632167
2.263167522	×ÔÉí³µÁ¾	Road 1	6.657603799	12.05801783	-0.020551618	0.738679171	0.380392164	0	28.6687	977.3154	655.7375	3.8132	0.7052	123	0.628638356	0.001452155	1.14946929	0.002655274
2.27990191	×ÔÉí³µÁ¾	Road 1	6.713797719	12.08876667	-0.020737646	0.770248532	0.403921574	0	28.7123	977.3164	655.7375	3.813	0.7044	124	0.585741037	0.001353062	1.159271308	0.002677917
2.296502871	×ÔÉí³µÁ¾	Road 1	6.769787936	12.14175339	-0.020876165	0.827029526	0.427450985	0	28.7829	977.3184	655.7375	3.8124	0.7051	125	0.72861515	0.001683101	1.17136702	0.002705858
2.313312036	×ÔÉí³µÁ¾	Road 1	6.826682921	12.18513479	-0.021008329	0.873718023	0.443137258	0	28.837	977.3203	655.7376	3.8104	0.7051	126	0.666059061	0.001538596	1.182562917	0.00273172
2.329988508	×ÔÉí³µÁ¾	Road 1	6.883301475	12.22241707	-0.021162057	0.913556516	0.458823532	0	28.881	977.3223	655.7376	3.8093	0.7062	127	0.630842442	0.001457246	1.193083143	0.002756022
2.346496731	×ÔÉí³µÁ¾	Road 1	6.939657955	12.2898345	-0.021478832	0.957654834	0.466666669	0	28.9559	977.3242	655.7376	3.8087	0.7059	128	0.828139386	0.001913002	1.206754253	0.002787602
2.363225621	×ÔÉí³µÁ¾	Road 1	6.996964834	12.33224516	-0.021855958	1.022704124	0.466666669	0	29.0004	977.3262	655.7377	3.8075	0.706	129	0.665639028	0.001537626	1.217889654	0.002813325
2.379909057	×ÔÉí³µÁ¾	Road 1	7.054434853	12.40104618	-0.022411684	1.080752373	0.458823532	0	29.069	977.3281	655.7377	3.8068	0.7067	130	0.837184303	0.001933896	1.231856766	0.002845589
2.396566835	×ÔÉí³µÁ¾	Road 1	7.112067254	12.45524139	-0.023192003	1.119829297	0.450980395	0	29.1208	977.3301	655.7377	3.8058	0.7068	131	0.74630649	0.001723968	1.244288573	0.002874307
2.413171462	×ÔÉí³µÁ¾	Road 1	7.169774717	12.51138411	-0.023982616	1.153206944	0.450980395	0	29.1728	977.3311	655.7377	3.8058	0.7058	132	0.762070702	0.001760383	1.256942473	0.002903537
2.429897786	×ÔÉí³µÁ¾	Road 1	7.228264712	12.5887785	-0.025001761	1.191135526	0.450980395	0	29.2425	977.334	655.7377	3.8031	0.7065	133	0.899756502	0.002078438	1.271992092	0.002938302
2.446669196	×ÔÉí³µÁ¾	Road 1	7.2871721	12.64452982	-0.026065469	1.216353178	0.450980395	0	29.2915	977.3359	655.7377	3.8021	0.7076	134	0.760791937	0.001757429	1.284751645	0.002967776
2.463243032	×ÔÉí³µÁ¾	Road 1	7.34566691	12.70564728	-0.027258316	1.24205029	0.450980395	0	29.3443	977.3379	655.7377	3.8011	0.7076	135	0.802751844	0.001854357	1.298056323	0.00299851
2.479861588	×ÔÉí³µÁ¾	Road 1	7.404744761	12.7977582	-0.028743969	1.279089451	0.450980395	0	29.4222	977.3398	655.7377	3.8005	0.7072	136	1.010338124	0.002333881	1.314846684	0.003037296
2.496504337	×ÔÉí³µÁ¾	Road 1	7.464186364	12.85783796	-0.030264862	1.300445437	0.450980395	0	29.4721	977.3418	655.7377	3.7995	0.7082	137	0.800197315	0.001848456	1.328164167	0.003068059
2.513229561	×ÔÉí³µÁ¾	Road 1	7.524206764	12.91901636	-0.031866077	1.322687387	0.466666669	0	29.5222	977.3438	655.7378	3.7974	0.7083	138	0.807898195	0.001866245	1.341676445	0.003099273
2.529937191	×ÔÉí³µÁ¾	Road 1	7.584621157	13.0175148	-0.033589471	1.360507965	0.474509805	0	29.6014	977.3467	655.7378	3.7959	0.7088	139	1.061955142	0.002453116	1.359419198	0.003140258
2.546528988	×ÔÉí³µÁ¾	Road 1	7.644891505	13.07713966	-0.035591397	1.383026123	0.490196079	0	29.6485	977.3486	655.7378	3.7948	0.7089	140	0.806910238	0.001863963	1.372807289	0.003171185
2.563673552	×ÔÉí³µÁ¾	Road 1	7.707526629	13.15206642	-0.037343055	1.413520098	0.498039216	0	29.7067	977.3506	655.7378	3.7939	0.7088	141	0.897605633	0.002073469	1.388196347	0.003206734
2.579955977	×ÔÉí³µÁ¾	Road 1	7.767469294	13.25316124	-0.039119605	1.456423521	0.521568656	0	29.7837	977.3545	655.7379	3.7914	0.7103	142	1.111487026	0.002567535	1.40629405	0.003248539
2.600255123	×ÔÉí³µÁ¾	Road 1	7.842760263	13.35265446	-0.041016921	1.501727462	0.53725493	0	29.8576	977.3574	655.7379	3.7889	0.7109	143	0.967329822	0.002234532	1.42593002	0.003293898
2.616365266	×ÔÉí³µÁ¾	Road 1	7.902834419	13.4242733	-0.042918473	1.533696055	0.552941203	0	29.9096	977.3594	655.7379	3.7878	0.711	144	0.91877634	0.002122373	1.440731638	0.00332809
2.630734267	×ÔÉí³µÁ¾	Road 1	7.956708584	13.4975976	-0.044785477	1.56941092	0.568627477	0	29.9619	977.3613	655.7379	3.7868	0.711	145	0.99860279	0.002306772	1.455080562	0.003361236
2.646540535	×ÔÉí³µÁ¾	Road 1	8.016325244	13.57815657	-0.046374172	1.607379556	0.568627477	0	30.0183	977.3643	655.7379	3.7849	0.7119	146	1.001885005	0.002314354	1.470916625	0.003397817
2.66322727	×ÔÉí³µÁ¾	Road 1	8.079775216	13.68871078	-0.047746513	1.655354619	0.568627477	0	30.094	977.3672	655.738	3.7824	0.7125	147	1.18705635	0.0027421	1.49072472	0.003443574
2.679907408	×ÔÉí³µÁ¾	Road 1	8.143594587	13.77385139	-0.048680354	1.689925909	0.568627477	0	30.1512	977.3701	655.738	3.7805	0.7134	148	1.012835021	0.002339649	1.507618948	0.0034826
2.696596709	×ÔÉí³µÁ¾	Road 1	8.207824829	13.8549159	-0.049515102	1.719292402	0.568627477	0	30.2048	977.3721	655.738	3.7795	0.7134	149	0.987639131	0.002281446	1.524101955	0.003520676
2.713184841	×ÔÉí³µÁ¾	Road 1	8.272210829	13.97321892	-0.049873982	1.758468509	0.56078434	0	30.2821	977.376	655.738	3.776	0.7139	150	1.26624243	0.00292502	1.545106552	0.003569196
2.729859847	×ÔÉí³µÁ¾	Road 1	8.337324945	14.05761538	-0.049886387	1.782394767	0.56078434	0	30.3365	977.3789	655.7381	3.7741	0.7149	151	1.022360721	0.002361653	1.562154423	0.003608577
2.746603766	×ÔÉí³µÁ¾	Road 1	8.403134761	14.14933662	-0.049886387	1.80613625	0.552941203	0	30.3953	977.3818	655.7381	3.7722	0.7148	152	1.077705303	0.002489499	1.580199432	0.003650261
2.763199229	×ÔÉí³µÁ¾	Road 1	8.468789437	14.24225607	-0.049886387	1.826443434	0.545098066	0	30.4543	977.3848	655.7382	3.7694	0.7156	153	1.09766756	0.002535612	1.598415734	0.00369234
2.783809581	×ÔÉí³µÁ¾	Road 1	8.551335229	14.41823215	-0.04976242	1.855563998	0.53725493	0	30.5657	977.3906	655.7382	3.7655	0.7165	154	1.469530932	0.003394616	1.628703284	0.003762305
2.813261268	×ÔÉí³µÁ¾	Road 1	8.670542298	14.57116699	-0.04955215	1.875537992	0.53725493	0	30.6622	977.3955	655.7382	3.7614	0.7177	155	1.063788145	0.002457351	1.66003364	0.003834678
2.82997293	×ÔÉí³µÁ¾	Road 1	8.738811021	14.70634174	-0.049404077	1.891326547	0.53725493	0	30.7475	977.4004	655.7383	3.758	0.7181	156	1.437659381	0.003320993	1.684059317	0.003890177
2.846526972	×ÔÉí³µÁ¾	Road 1	8.806853087	14.7970768	-0.049404077	1.899649262	0.529411793	0	30.8048	977.4033	655.7383	3.7552	0.719	157	1.113845755	0.002572984	1.702497966	0.00393277
2.863212242	×ÔÉí³µÁ¾	Road 1	8.875856887	14.88820324	-0.049404077	1.90705657	0.529411793	0	30.8625	977.4072	655.7384	3.7523	0.7199	158	1.116341053	0.002578748	1.721124418	0.003975797
2.8800456	×ÔÉí³µÁ¾	Road 1	8.946176326	15.03859062	-0.049404077	1.916211128	0.529411793	0	30.958	977.4121	655.7384	3.7482	0.7211	159	1.572237775	0.003631869	1.747590459	0.004036934
2.896504704	×ÔÉí³µÁ¾	Road 1	9.015382597	15.1370676	-0.049404077	1.921262026	0.529411793	0	31.0208	977.416	655.7385	3.7454	0.7219	160	1.197865144	0.002767068	1.767306246	0.004082477
2.913229195	×ÔÉí³µÁ¾	Road 1	9.086132864	15.22922058	-0.049404077	1.925636172	0.529411793	0	31.0798	977.4189	655.7385	3.7426	0.7218	161	1.141437675	0.002636721	1.78639621	0.004126575
2.929841519	×ÔÉí³µÁ¾	Road 1	9.156834768	15.32156754	-0.049404077	1.929234743	0.529411793	0	31.1391	977.4229	655.7385	3.7397	0.7226	162	1.153001374	0.002663433	1.805550244	0.004170821
2.946561978	×ÔÉí³µÁ¾	Road 1	9.228703324	15.47366638	-0.049404077	1.934347868	0.529411793	0	31.2373	977.4287	655.7386	3.7346	0.7247	163	1.630793516	0.003767133	1.832817859	0.004233809
2.96322892	×ÔÉí³µÁ¾	Road 1	9.300802053	15.57306862	-0.049404077	1.937431931	0.529411793	0	31.3019	977.4326	655.7386	3.7319	0.7255	164	1.221214535	0.002821006	1.853171771	0.004280827
2.97982365	×ÔÉí³µÁ¾	Road 1	9.373016633	15.66596661	-0.049404077	1.939300656	0.529411793	0	31.3626	977.4365	655.7387	3.7291	0.7263	165	1.177489561	0.002720001	1.872711892	0.004325964
2.99665994	×ÔÉí³µÁ¾	Road 1	9.44693481	15.80546722	-0.049404077	1.941826105	0.529411793	0	31.4542	977.4424	655.7388	3.7239	0.7276	166	1.549685845	0.003579774	1.898802853	0.004386235
3.013210684	×ÔÉí³µÁ¾	Road 1	9.520027239	15.89854546	-0.049404077	1.942572951	0.529411793	0	31.5158	977.4453	655.7388	3.7221	0.7284	167	1.194075943	0.002758315	1.918565698	0.004431887
3.029824108	×ÔÉí³µÁ¾	Road 1	9.593826199	15.99166145	-0.049404077	1.942904353	0.529411793	0	31.5777	977.4492	655.7388	3.7183	0.7292	168	1.196714209	0.00276441	1.938447219	0.004477813
3.046500947	×ÔÉí³µÁ¾	Road 1	9.668553951	16.13134918	-0.049404077	1.942828417	0.529411793	0	31.6444	977.4541	655.7389	3.7146	0.73	169	1.588102133	0.003668516	1.964931742	0.004538992
3.063200512	×ÔÉí³µÁ¾	Road 1	9.743877203	16.23777065	-0.049404077	1.942407727	0.529411793	0	31.7431	977.46	655.739	3.7096	0.7321	170	1.31762272	0.003043708	1.986935468	0.004589821
3.080092885	×ÔÉí³µÁ¾	Road 1	9.820631754	16.35746326	-0.049379427	1.942033529	0.529411793	0	31.8063	977.4639	655.739	3.7068	0.7328	171	1.425186227	0.00329218	2.011010246	0.004645434
3.096484177	×ÔÉí³µÁ¾	Road 1	9.895623612	16.47037354	-0.049194816	1.937706232	0.529411793	0	31.9018	977.4707	655.7391	3.7007	0.736	172	1.405217656	0.003246053	2.034043578	0.004698641
3.113197304	×ÔÉí³µÁ¾	Road 1	9.972518303	16.56308098	-0.049022928	1.931842208	0.529411793	0	31.9659	977.4746	655.7391	3.698	0.7368	173	1.220584573	0.00281955	2.054443364	0.004745764
3.129922895	×ÔÉí³µÁ¾	Road 1	10.04993018	16.66865616	-0.048729196	1.925285459	0.529411793	0	32.035	977.4795	655.7391	3.6934	0.7394	174	1.335986563	0.003086129	2.076788528	0.004797382
3.146506262	×ÔÉí³µÁ¾	Road 1	10.12731928	16.80001144	-0.048485316	1.916098118	0.529411793	0	32.1324	977.4854	655.7393	3.6893	0.7405	175	1.576169926	0.003640953	2.102926732	0.004857761
3.163159641	×ÔÉí³µÁ¾	Road 1	10.20548896	16.89812279	-0.048072591	1.909244418	0.529411793	0	32.2025	977.4902	655.7393	3.6847	0.7422	176	1.289268747	0.002978211	2.124397413	0.004907358
3.179944613	×ÔÉí³µÁ¾	Road 1	10.2847019	16.98939857	-0.047674254	1.903733134	0.529411793	0	32.2683	977.4951	655.7393	3.681	0.7449	177	1.228405047	0.002837616	2.145016158	0.004954987
3.196536777	×ÔÉí³µÁ¾	Road 1	10.36363356	17.12579384	-0.047218293	1.895879269	0.529411793	0	32.3676	977.502	655.7394	3.6749	0.747	178	1.644989896	0.003799927	2.172310101	0.005018036
3.213148369	×ÔÉí³µÁ¾	Road 1	10.44310553	17.22285976	-0.046729606	1.890424132	0.529411793	0	32.439	977.5068	655.7395	3.6713	0.7486	179	1.301213544	0.003005803	2.193925329	0.005067968
3.229859664	×ÔÉí³µÁ¾	Road 1	10.52347388	17.31320343	-0.046114672	1.885991812	0.529411793	0	32.5061	977.5107	655.7395	3.6686	0.7503	180	1.241416588	0.002867672	2.214671007	0.00511589
3.246480053	×ÔÉí³µÁ¾	Road 1	10.60402865	17.44827862	-0.045598578	1.878602147	0.529411793	0	32.6072	977.5176	655.7396	3.6627	0.7523	181	1.65642784	0.003826348	2.242201482	0.005179485
3.263195746	×ÔÉí³µÁ¾	Road 1	10.68549159	17.54438496	-0.044901036	1.874295473	0.529411793	0	32.68	977.5234	655.7397	3.6581	0.7549	182	1.305792314	0.00301638	2.264028707	0.005229906
3.279848759	×ÔÉí³µÁ¾	Road 1	10.76706288	17.63384628	-0.044050582	1.868941665	0.529411793	0	32.7482	977.5283	655.7397	3.6535	0.7576	183	1.253733667	0.002896125	2.284907149	0.005278136
3.296533295	×ÔÉí³µÁ¾	Road 1	10.84940845	17.76759281	-0.04315459	1.862862825	0.529411793	0	32.8513	977.5352	655.7398	3.6485	0.7596	184	1.664423471	0.003844818	2.312677283	0.005342285
3.313172745	×ÔÉí³µÁ¾	Road 1	10.93194241	17.85649452	-0.042270828	1.859077573	0.529411793	0	32.9204	977.54	655.7399	3.6439	0.7622	185	1.261311918	0.002913631	2.333664819	0.005390766
3.329914464	×ÔÉí³µÁ¾	Road 1	11.01539642	17.94525719	-0.041169554	1.857372642	0.529411793	0	32.9899	977.5449	655.7399	3.6403	0.7639	186	1.259770105	0.002910069	2.354755536	0.005439485
3.346479503	×ÔÉí³µÁ¾	Road 1	11.09861025	18.08446083	-0.039873485	1.851713777	0.529411793	0	33.0997	977.5527	655.74	3.6335	0.7668	187	1.748940918	0.004040054	2.383726811	0.005506409
3.363188965	×ÔÉí³µÁ¾	Road 1	11.18296028	18.17294197	-0.038709573	1.850899458	0.529411793	0	33.1701	977.5576	655.7401	3.6298	0.7694	188	1.270943603	0.00293588	2.404963595	0.005555466
3.381709215	×ÔÉí³µÁ¾	Road 1	11.27713196	18.30526371	-0.037548002	1.844318032	0.529411793	0	33.2762	977.5654	655.7401	3.623	0.7723	189	1.568536253	0.003623319	2.434013277	0.005622571
3.413252471	×ÔÉí³µÁ¾	Road 1	11.4385682	18.42455463	-0.036189087	1.838876247	0.529411793	0	33.3729	977.5723	655.7402	3.6179	0.7754	190	1.04351134	0.002410511	2.466929023	0.005698606
3.429878725	×ÔÉí³µÁ¾	Road 1	11.52452713	18.6122612	-0.03486336	1.831897259	0.529411793	0	33.5269	977.584	655.7404	3.608	0.7814	191	2.251527263	0.005201028	2.504363487	0.00578508
3.446537969	×ÔÉí³µÁ¾	Road 1	11.61106084	18.69960938	-0.032505263	1.829221129	0.529411793	0	33.5993	977.5889	655.7404	3.6044	0.783	192	1.290775912	0.002981692	2.525866838	0.005834752
3.463167888	×ÔÉí³µÁ¾	Road 1	11.69804604	18.83032093	-0.031508531	1.825962543	0.529411793	0	33.7085	977.5967	655.7405	3.5976	0.7869	193	1.721089477	0.003975717	2.554488417	0.005900868
3.479899344	×ÔÉí³µÁ¾	Road 1	11.78599505	18.92342491	-0.030523445	1.820453644	0.529411793	0	33.7869	977.6025	655.7406	3.5931	0.7893	194	1.354955908	0.003129948	2.577158801	0.005953237
3.496471714	×ÔÉí³µÁ¾	Road 1	11.87350696	19.01012592	-0.029760877	1.81682694	0.529411793	0	33.8605	977.6084	655.7407	3.5876	0.7929	195	1.305380102	0.003015428	2.598792044	0.00600321
3.51315515	×ÔÉí³µÁ¾	Road 1	11.96206357	19.10900116	-0.029106302	1.812881112	0.529411793	0	33.945	977.6143	655.7407	3.5833	0.7952	196	1.424801264	0.003291291	2.622562625	0.00605812
3.529839687	×ÔÉí³µÁ¾	Road 1	12.05108343	19.20769615	-0.028581051	1.809759498	0.529411793	0	34.03	977.6211	655.7408	3.578	0.7995	197	1.428775083	0.00330047	2.646401075	0.006113186
3.546540718	×ÔÉí³µÁ¾	Road 1	12.14079063	19.33688507	-0.028206129	1.806608438	0.529411793	0	34.1421	977.6289	655.7409	3.5712	0.8033	198	1.738731589	0.00401647	2.675439686	0.006180266
3.563153409	×ÔÉí³µÁ¾	Road 1	12.23041975	19.42278957	-0.027943958	1.801508784	0.529411793	0	34.2173	977.6348	655.741	3.5667	0.8068	199	1.317108398	0.00304252	2.697320401	0.00623081
3.579845277	×ÔÉí³µÁ¾	Road 1	12.32087354	19.50852242	-0.027792478	1.798237443	0.521568656	0	34.2928	977.6396	655.741	3.5632	0.8084	200	1.31575407	0.003039392	2.719282793	0.006281543
3.596486193	×ÔÉí³µÁ¾	Road 1	12.41144655	19.59404411	-0.027742106	1.792971969	0.521568656	0	34.3686	977.6455	655.7411	3.5577	0.8119	201	1.320733254	0.003050894	2.741261005	0.006332313
3.613138106	×ÔÉí³µÁ¾	Road 1	12.50255796	19.69750099	-0.027700176	1.785672545	0.521568656	0	34.4612	977.6523	655.7412	3.5526	0.8161	202	1.508020408	0.003483527	2.766372429	0.00639032
3.629884223	×ÔÉí³µÁ¾	Road 1	12.59477643	19.82468319	-0.027675038	1.777627945	0.53725493	0	34.5762	977.6611	655.7413	3.5459	0.8208	203	1.751180549	0.004045227	2.795697904	0.006458062
3.646528072	×ÔÉí³µÁ¾	Road 1	12.68682268	19.90924873	-0.027658289	1.776149035	0.53725493	0	34.6532	977.667	655.7413	3.5404	0.8243	204	1.327186648	0.003065801	2.817787398	0.006509089
3.663167888	×ÔÉí³µÁ¾	Road 1	12.77926545	19.99985847	-0.027658289	1.777757049	0.53725493	0	34.7362	977.6729	655.7415	3.5361	0.8276	205	1.394588628	0.0032215	2.840993097	0.006562694
3.679874051	×ÔÉí³µÁ¾	Road 1	12.87266601	20.12682438	-0.027658289	1.77910161	0.53725493	0	34.8529	977.6816	655.7415	3.5294	0.8323	206	1.77427271	0.00409857	2.870634386	0.006631165
3.696486009	×ÔÉí³µÁ¾	Road 1	12.96593045	20.21146374	-0.027658289	1.778238177	0.53725493	0	34.9311	977.6875	655.7416	3.525	0.8358	207	1.345280139	0.003107597	2.892982123	0.006682789
3.713131324	×ÔÉí³µÁ¾	Road 1	13.05980115	20.30207863	-0.027658289	1.776146054	0.53725493	0	35.0153	977.6943	655.7417	3.5187	0.8401	208	1.410900455	0.00325918	2.916467006	0.006737039
3.730228969	×ÔÉí³µÁ¾	Road 1	13.15679581	20.42274113	-0.027658289	1.774014831	0.53725493	0	35.1225	977.7021	655.7418	3.5128	0.845	209	1.700719481	0.003928662	2.945545304	0.00680421
3.746483902	×ÔÉí³µÁ¾	Road 1	13.24958065	20.54917316	-0.027658289	1.766890049	0.53725493	0	35.2473	977.7119	655.7419	3.5053	0.8505	210	1.836850072	0.004243124	2.975403178	0.006873181
3.763163673	×ÔÉí³µÁ¾	Road 1	13.34517892	20.633004	-0.027658289	1.758285522	0.53725493	0	35.3272	977.7178	655.7419	3.4999	0.854	211	1.354825863	0.003129648	2.998001363	0.006925383
3.779874968	×ÔÉí³µÁ¾	Road 1	13.44134477	20.71635075	-0.027658289	1.748409986	0.53725493	0	35.4074	977.7236	655.7421	3.4955	0.8574	212	1.352235128	0.003123663	3.020598963	0.006977584
3.796490958	×ÔÉí³µÁ¾	Road 1	13.53734468	20.79922371	-0.027658289	1.739388108	0.545098066	0	35.4879	977.7295	655.7421	3.4911	0.8608	213	1.356478491	0.003133465	3.043138196	0.007029649
3.813205185	×ÔÉí³µÁ¾	Road 1	13.63456785	20.94044781	-0.027675038	1.730210543	0.552941203	0	35.6266	977.7402	655.7422	3.4829	0.867	214	1.986763444	0.004589424	3.076345412	0.007106358
3.829822275	×ÔÉí³µÁ¾	Road 1	13.7316053	21.02262211	-0.027675038	1.72980082	0.56078434	0	35.708	977.7471	655.7423	3.4765	0.8714	215	1.360176572	0.003142008	3.098947588	0.007158569
3.84652294	×ÔÉí³µÁ¾	Road 1	13.82951238	21.10487881	-0.027708558	1.733430386	0.568627477	0	35.7896	977.7529	655.7424	3.4721	0.8748	216	1.360723261	0.003143271	3.121672571	0.007211064
3.863135998	×ÔÉí³µÁ¾	Road 1	13.92731398	21.19331532	-0.027792478	1.740742922	0.576470613	0	35.8775	977.7598	655.7424	3.4669	0.8791	217	1.437778695	0.003321269	3.145558472	0.00726624
3.896580581	×ÔÉí³µÁ¾	Road 1	14.12597369	21.38388004	-0.027901825	1.766624451	0.58431375	0	36.0662	977.7754	655.7427	3.4537	0.8893	218	1.514597878	0.003498721	3.196213567	0.007383253
3.913165781	×ÔÉí³µÁ¾	Road 1	14.22518532	21.53497467	-0.028062155	1.788639545	0.592156887	0	36.2148	977.7871	655.7428	3.4446	0.8963	219	2.156999204	0.004982668	3.231987829	0.007465892
3.929889905	×ÔÉí³µÁ¾	Road 1	14.32562513	21.62046375	-0.028359106	1.802320838	0.623529434	0	36.2984	977.7939	655.7429	3.4393	0.9007	220	1.421363096	0.003283349	3.255758882	0.007520803
3.946503329	×ÔÉí³µÁ¾	Road 1	14.42582727	21.71302528	-0.028572492	1.824394345	0.639215708	0	36.3884	977.8008	655.7429	3.4331	0.9049	221	1.512104249	0.003492961	3.280880112	0.007578833
3.963116754	×ÔÉí³µÁ¾	Road 1	14.52649262	21.81339912	-0.028743969	1.857907414	0.662745118	0	36.4849	977.8086	655.743	3.427	0.909	222	1.605971264	0.003709794	3.307560794	0.007640465
3.979876434	×ÔÉí³µÁ¾	Road 1	14.62870342	21.95500603	-0.028942015	1.914219022	0.670588255	0	36.6182	977.8193	655.7432	3.4187	0.9163	223	2.068708423	0.004778716	3.342231686	0.007720555
3.996511485	×ÔÉí³µÁ¾	Road 1	14.73058166	22.04752121	-0.029063009	1.952444196	0.686274529	0	36.7035	977.8271	655.7433	3.4124	0.9216	224	1.528905574	0.003531772	3.367665108	0.007779306
4.013134073	×ÔÉí³µÁ¾	Road 1	14.83281965	22.14196587	-0.029193019	1.991244793	0.701960802	0	36.7891	977.834	655.7433	3.4061	0.9259	225	1.557092856	0.003596884	3.393548022	0.007839096
4.029884956	×ÔÉí³µÁ¾	Road 1	14.93655647	22.29449902	-0.029236441	2.056408882	0.717647076	0	36.9245	977.8447	655.7435	3.3978	0.9322	226	2.221834928	0.005132439	3.430765718	0.007925069
4.046457326	×ÔÉí³µÁ¾	Road 1	15.03964722	22.39430466	-0.029279906	2.098944902	0.725490212	0	37.0111	977.8525	655.7436	3.3916	0.9375	227	1.637104298	0.003781711	3.457896417	0.007987741
4.063173387	×ÔÉí³µÁ¾	Road 1	15.1441049	22.49618912	-0.029279906	2.139061689	0.733333349	0	37.0981	977.8594	655.7437	3.3853	0.9408	228	1.657226107	0.003828192	3.485598708	0.008051733
4.079801107	×ÔÉí³µÁ¾	Road 1	15.24876853	22.66029739	-0.029279906	2.199537516	0.741176486	0	37.2356	977.8711	655.7438	3.3761	0.949	229	2.402001377	0.005548623	3.525538514	0.008143994
4.096519366	×ÔÉí³µÁ¾	Road 1	15.35449833	22.76715832	-0.029279906	2.236019373	0.749019623	0	37.3236	977.8789	655.7439	3.3699	0.9532	230	1.731747288	0.004000336	3.554490315	0.008210873
4.11320097	×ÔÉí³µÁ¾	Road 1	15.46049984	22.87582512	-0.029279906	2.271131754	0.749019623	0	37.4121	977.8867	655.744	3.3627	0.9585	231	1.762665702	0.004071758	3.583894406	0.008278796
4.129820259	×ÔÉí³µÁ¾	Road 1	15.56665128	22.99407406	-0.029279906	2.303870916	0.749019623	0	37.5073	977.8945	655.7441	3.3566	0.9636	232	1.889091206	0.004363801	3.615289759	0.008351319
4.146430385	×ÔÉí³µÁ¾	Road 1	15.67359458	23.17838516	-0.029279906	2.342571735	0.749019623	0	37.6543	977.9072	655.7443	3.3465	0.9716	233	2.694108128	0.00622339	3.660039233	0.008454691
4.16342576	×ÔÉí³µÁ¾	Road 1	15.78355454	23.2919735	-0.029279906	2.361704826	0.749019623	0	37.7443	977.915	655.7444	3.3393	0.9768	234	1.823189106	0.004211567	3.691025017	0.008526268
4.179775264	×ÔÉí³µÁ¾	Road 1	15.88985548	23.40642185	-0.029279906	2.376433134	0.741176486	0	37.8348	977.9229	655.7444	3.3332	0.981	235	1.894554848	0.004376422	3.722000049	0.00859782
4.196614487	×ÔÉí³µÁ¾	Road 1	16.00018754	23.58751602	-0.029279906	2.390819788	0.733333349	0	37.9778	977.9355	655.7446	3.323	0.9891	236	2.667230414	0.006161302	3.766914137	0.008701572
4.213126009	×ÔÉí³µÁ¾	Road 1	16.10890256	23.70308876	-0.029279906	2.392329693	0.733333349	0	38.0695	977.9443	655.7448	3.3149	0.9953	237	1.914654254	0.004422851	3.798527992	0.0087746
4.229809812	×ÔÉí³µÁ¾	Road 1	16.21928736	23.81862545	-0.029279906	2.39016366	0.725490212	0	38.1615	977.9521	655.7448	3.3088	1.0004	238	1.907257253	0.004405764	3.830348297	0.008848105
4.246465024	×ÔÉí³µÁ¾	Road 1	16.33032112	23.99978828	-0.029279906	2.382293463	0.725490212	0	38.3071	977.9648	655.745	3.2987	1.0085	239	2.734151757	0.006315891	3.875886173	0.008953297
4.26314003	×ÔÉí³µÁ¾	Road 1	16.44201906	24.11468811	-0.029279906	2.375981092	0.717647076	0	38.4003	977.9736	655.7451	3.2906	1.0136	240	1.920116528	0.004435469	3.907904128	0.009027259
4.279764084	×ÔÉí³µÁ¾	Road 1	16.55390451	24.22920513	-0.029279906	2.366583109	0.717647076	0	38.4939	977.9824	655.7452	3.2835	1.0197	241	1.927439241	0.004452385	3.939945983	0.009101275
4.296503238	×ÔÉí³µÁ¾	Road 1	16.66739649	24.40811234	-0.029279906	2.349009037	0.709803939	0	38.6419	977.9961	655.7454	3.2725	1.0288	242	2.736033434	0.006320237	3.985744865	0.009207071
4.313202436	×ÔÉí³µÁ¾	Road 1	16.78114216	24.52120113	-0.029279906	2.337281942	0.701960802	0	38.7367	978.0049	655.7455	3.2644	1.0348	243	1.922499854	0.004440975	4.017849072	0.009281231
4.329837487	×ÔÉí³µÁ¾	Road 1	16.89500749	24.64165592	-0.029279906	2.322831869	0.701960802	0	38.8387	978.0137	655.7456	3.2575	1.0398	244	2.029883033	0.00468903	4.05161628	0.009359234
4.346429651	×ÔÉí³µÁ¾	Road 1	17.00935045	24.80897942	-0.029279906	2.303149462	0.701960802	0	38.9824	978.0273	655.7457	3.2454	1.0489	245	2.647767779	0.006116344	4.095548478	0.009460717
4.363136914	×ÔÉí³µÁ¾	Road 1	17.12500045	24.919701	-0.029279906	2.289721251	0.701960802	0	39.0787	978.0361	655.7458	3.2384	1.055	246	1.917842766	0.004430217	4.127590381	0.009534734
4.379781496	×ÔÉí³µÁ¾	Road 1	17.24097942	25.08469677	-0.029279906	2.27440691	0.701960802	0	39.2239	978.0498	655.746	3.2273	1.064	247	2.636963499	0.006091386	4.171481535	0.009636122
4.396439274	×ÔÉí³µÁ¾	Road 1	17.35755663	25.19411373	-0.029279906	2.266510725	0.701960802	0	39.3213	978.0586	655.7461	3.2193	1.0701	248	1.922992453	0.004442113	4.203514316	0.009710118
4.413142138	×ÔÉí³µÁ¾	Road 1	17.47495529	25.30315647	-0.029279906	2.260001421	0.701960802	0	39.419	978.0684	655.7462	3.2113	1.0761	249	1.921283571	0.004438165	4.235605254	0.009784248
4.42982814	×ÔÉí³µÁ¾	Road 1	17.59273943	25.41189365	-0.029279906	2.253712177	0.701960802	0	39.5172	978.0771	655.7463	3.2043	1.0821	250	1.925705437	0.00444838	4.26773758	0.009858474
4.446416272	×ÔÉí³µÁ¾	Road 1	17.71065318	25.58995113	-0.029279906	2.245112658	0.701960802	0	39.6794	978.0928	655.7466	3.1906	1.0928	251	2.864580328	0.006617181	4.315255616	0.00996824
4.4631294	×ÔÉí³µÁ¾	Road 1	17.82995703	25.6979948	-0.029279906	2.240656853	0.701960802	0	39.7787	978.1025	655.7467	3.1826	1.0998	252	1.932522724	0.004464127	4.347554115	0.01004285
4.479794142	×ÔÉí³µÁ¾	Road 1	17.94941475	25.80584621	-0.029279906	2.237770319	0.701960802	0	39.8784	978.1123	655.7468	3.1746	1.1058	253	1.941001888	0.004483714	4.379900412	0.01011757
4.496442756	×ÔÉí³µÁ¾	Road 1	18.06953935	25.9750494	-0.029279906	2.23375988	0.701960802	0	40.0359	978.1279	655.7471	3.1609	1.1166	254	2.775989315	0.006412535	4.426116786	0.01022433
4.513139755	×ÔÉí³µÁ¾	Road 1	18.19054716	26.090205	-0.029279906	2.230281353	0.701960802	0	40.1439	978.1377	655.7472	3.1531	1.1234	255	2.054516283	0.004745933	4.460421042	0.010303573
4.529781404	×ÔÉí³µÁ¾	Road 1	18.3116499	26.19751568	-0.029279906	2.226587534	0.701960802	0	40.2451	978.1484	655.7473	3.1441	1.1303	256	1.960656988	0.004529118	4.493049608	0.010378945
4.546428918	×ÔÉí³µÁ¾	Road 1	18.43350322	26.35059814	-0.029279906	2.225128889	0.701960802	0	40.3467	978.1582	655.7474	3.1352	1.1363	257	2.59288045	0.005989554	4.536214622	0.010478656
4.563140213	×ÔÉí³µÁ¾	Road 1	18.55639123	26.47292233	-0.029279906	2.221806288	0.701960802	0	40.5073	978.1738	655.7476	3.1225	1.148	258	2.176654778	0.005028073	4.572589342	0.010562681
4.579833547	×ÔÉí³µÁ¾	Road 1	18.67964304	26.57986221	-0.029279906	2.21992135	0.701960802	0	40.6099	978.1846	655.7477	3.1136	1.1549	259	1.975279296	0.004562895	4.605563338	0.010638851
4.596448437	×ÔÉí³µÁ¾	Road 1	18.8030551	26.74007549	-0.029279906	2.21714282	0.701960802	0	40.7647	978.2002	655.7479	3.0998	1.1657	260	2.729618351	0.006305418	4.650915648	0.010743615
4.613121977	×ÔÉí³µÁ¾	Road 1	18.92743207	26.85435219	-0.029236441	2.214569092	0.701960802	0	40.8758	978.2109	655.748	3.091	1.1735	261	2.096070384	0.004841923	4.685864561	0.010824347
4.629754462	×ÔÉí³µÁ¾	Road 1	19.05199517	26.960923	-0.029236441	2.212581396	0.701960802	0	40.9799	978.2217	655.7482	3.0812	1.1804	262	1.999639341	0.004619167	4.719123533	0.010901175
4.646467957	×ÔÉí³µÁ¾	Road 1	19.17790645	27.12063675	-0.029227754	2.210821152	0.701960802	0	41.1369	978.2373	655.7484	3.0684	1.1912	263	2.744033661	0.006338718	4.764985924	0.011007117
4.663180351	×ÔÉí³µÁ¾	Road 1	19.3043385	27.2345993	-0.029227754	2.208568096	0.701960802	0	41.2496	978.249	655.7485	3.0587	1.1999	264	2.113401976	0.004881959	4.800305931	0.011088707
4.679756753	×ÔÉí³µÁ¾	Road 1	19.43023113	27.34088345	-0.029201699	2.206757545	0.701960802	0	41.3552	978.2598	655.7487	3.0489	1.2077	265	2.024675733	0.004677001	4.833867771	0.011166235
4.696485643	×ÔÉí³µÁ¾	Road 1	19.55802188	27.50013371	-0.029201699	2.204188108	0.701960802	0	41.5143	978.2764	655.7489	3.0351	1.2185	266	2.769694959	0.006397995	4.880201692	0.011273266
4.713136456	×ÔÉí³µÁ¾	Road 1	19.6857418	27.61376839	-0.029193019	2.203427076	0.701960802	0	41.6285	978.2881	655.749	3.0255	1.2271	267	2.14002175	0.00494345	4.915834794	0.011355578
4.729866445	×ÔÉí³µÁ¾	Road 1	19.81456171	27.71978302	-0.029149638	2.201805353	0.701960802	0	41.7355	978.2998	655.7493	3.0147	1.2359	268	2.030699797	0.004690917	4.94980838	0.011434057
4.746430385	×ÔÉí³µÁ¾	Road 1	19.9428339	27.87862816	-0.029123632	2.198788881	0.701960802	0	41.8969	978.3164	655.7494	3.001	1.2466	269	2.820691755	0.006515798	4.996530147	0.011541985
4.763175769	×ÔÉí³µÁ¾	Road 1	20.07303846	27.99197617	-0.029114967	2.197568178	0.701960802	0	42.0126	978.3291	655.7496	2.9894	1.2562	270	2.151839929	0.00497075	5.032563534	0.011625222
4.779858473	×ÔÉí³µÁ¾	Road 1	20.2032455	28.09768524	-0.029106302	2.196416378	0.701960802	0	42.1211	978.3398	655.7498	2.9806	1.264	271	2.05425631	0.004745332	5.066834083	0.011704387
4.796523581	×ÔÉí³µÁ¾	Road 1	20.33397883	28.24103966	-0.029063009	2.194918871	0.701960802	0	42.23	978.3516	655.7499	2.9709	1.2718	272	2.613731046	0.006037719	5.110392195	0.011805006
4.813108048	×ÔÉí³µÁ¾	Road 1	20.4646699	28.36918831	-0.029037053	2.192666531	0.701960802	0	42.4019	978.3701	655.7501	2.9545	1.2852	273	2.410773972	0.005568888	5.150373595	0.011897363
4.829775723	×ÔÉí³µÁ¾	Road 1	20.59650482	28.47461929	-0.029028405	2.190275908	0.694117665	0	42.5118	978.3818	655.7502	2.9447	1.293	274	2.075141596	0.004793577	5.18496138	0.011977261
4.846483352	×ÔÉí³µÁ¾	Road 1	20.72938851	28.63250484	-0.029028405	2.184395552	0.694117665	0	42.6774	978.4004	655.7505	2.9291	1.3066	275	2.854548668	0.006594007	5.232654121	0.012087431
4.863118037	×ÔÉí³µÁ¾	Road 1	20.86221173	28.74497566	-0.029028405	2.179502726	0.694117665	0	42.7963	978.4131	655.7507	2.9176	1.3161	276	2.199864447	0.005081687	5.269248173	0.012171963
4.879834463	×ÔÉí³µÁ¾	Road 1	20.99617378	28.8496685	-0.029028405	2.173578024	0.686274529	0	42.9076	978.4248	655.7509	2.9079	1.3239	277	2.083000627	0.004811731	5.3040685	0.012252398
4.896514967	×ÔÉí³µÁ¾	Road 1	21.13057285	29.00611725	-0.028993828	2.164083481	0.686274529	0	43.0754	978.4434	655.7511	2.8914	1.3374	278	2.870332564	0.006630468	5.351947094	0.012362998
4.913181909	×ÔÉí³µÁ¾	Road 1	21.2653777	29.11736755	-0.028985189	2.155870199	0.686274529	0	43.1958	978.457	655.7512	2.8799	1.3479	279	2.202877353	0.005088647	5.388662322	0.01244781
4.929985943	×ÔÉí³µÁ¾	Road 1	21.40177432	29.2208313	-0.02897655	2.149429321	0.678431392	0	43.3085	978.4697	655.7515	2.8692	1.3566	280	2.079340957	0.004803278	5.423603638	0.012528524
4.946487567	×ÔÉí³µÁ¾	Road 1	21.53645801	29.38263931	-0.028916132	2.136133194	0.678431392	0	43.4865	978.4893	655.7517	2.8519	1.3709	281	3.011548577	0.006956677	5.473299082	0.012643321
4.963135448	×ÔÉí³µÁ¾	Road 1	21.67280896	29.48503876	-0.028855797	2.127229929	0.678431392	0	43.6003	978.502	655.7518	2.8413	1.3805	282	2.093910976	0.004836934	5.508158262	0.012723846
4.979861772	×ÔÉí³µÁ¾	Road 1	21.81027629	29.58703995	-0.02876975	2.120056868	0.678431392	0	43.7145	978.5146	655.752	2.8306	1.3892	283	2.086696316	0.004820268	5.54306102	0.012804471
5.01401894	×ÔÉí³µÁ¾	Road 1	22.09374747	29.87648849	-0.028683875	2.09818387	0.670588255	0	44.0428	978.5518	655.7525	2.7985	1.4164	284	2.709697473	0.006259401	5.635616613	0.013018274
5.063124635	×ÔÉí³µÁ¾	Road 1	22.50595824	30.21968765	-0.02852973	2.074939489	0.670588255	0	44.4409	978.5977	655.7531	2.7588	1.4501	285	2.349906572	0.005428284	5.751010407	0.013284834
5.07990081	×ÔÉí³µÁ¾	Road 1	22.64724675	30.31910706	-0.028155258	2.069909573	0.670588255	0	44.5578	978.6113	655.7533	2.7462	1.4607	286	2.086041186	0.004818755	5.7860062	0.013365674
5.096476846	×ÔÉí³µÁ¾	Road 1	22.7873063	30.4182724	-0.026895078	2.064740419	0.662745118	0	44.6752	978.625	655.7534	2.7346	1.4703	287	2.106654075	0.004866371	5.820926173	0.013446339
5.113320834	×ÔÉí³µÁ¾	Road 1	22.93035654	30.57357101	-0.025689011	2.055333138	0.654901981	0	44.8603	978.6465	655.7538	2.7165	1.4864	288	2.967633102	0.006855232	5.87091295	0.013561809
5.131508617	×ÔÉí³µÁ¾	Road 1	23.08531604	30.67191925	-0.024465499	2.046323538	0.647058845	0	44.9786	978.6602	655.7539	2.704	1.496	289	1.969573597	0.004549715	5.906735127	0.013644558
5.148538449	×ÔÉí³µÁ¾	Road 1	23.23110269	30.81838417	-0.023296399	2.026796341	0.631372571	0	45.1567	978.6816	655.7542	2.6857	1.5122	290	2.824839069	0.006525378	5.954841662	0.013755684
5.164161072	×ÔÉí³µÁ¾	Road 1	23.36526213	30.91503983	-0.021999408	2.008492947	0.615686297	0	45.276	978.6953	655.7544	2.6732	1.5228	291	2.190802762	0.005060754	5.989067748	0.013834746
5.181234158	×ÔÉí³µÁ¾	Road 1	23.51233094	31.01066208	-0.020489857	1.986341357	0.600000024	0	45.3956	978.71	655.7546	2.6607	1.5333	292	2.039846442	0.004712045	6.023894222	0.013915196
5.196409583	×ÔÉí³µÁ¾	Road 1	23.64347919	31.11172943	-0.019116372	1.957467794	0.58431375	0	45.5241	978.7246	655.7548	2.6484	1.5446	293	2.329707239	0.005381624	6.059248518	0.013996864
5.213111347	×ÔÉí³µÁ¾	Road 1	23.78849129	31.25679016	-0.017699761	1.908148408	0.576470613	0	45.7134	978.7471	655.7551	2.6284	1.5616	294	2.883755609	0.006661475	6.107412325	0.014108122
5.22973027	×ÔÉí³µÁ¾	Road 1	23.93320048	31.34698448	-0.016207891	1.874034524	0.552941203	0	45.8343	978.7617	655.7552	2.6159	1.5721	295	2.011924177	0.004647545	6.140848337	0.01418536
5.246581222	×ÔÉí³µÁ¾	Road 1	24.0805472	31.47882385	-0.014719662	1.816035628	0.529411793	0	46.0162	978.7842	655.7556	2.5967	1.5893	296	2.668772981	0.006164866	6.185819705	0.014289244
5.263143696	×ÔÉí³µÁ¾	Road 1	24.22576397	31.56414986	-0.013161448	1.773108125	0.505882382	0	46.138	978.7979	655.7557	2.5843	1.5998	297	1.948881059	0.004501915	6.218097995	0.014363806
5.279875151	×ÔÉí³µÁ¾	Road 1	24.37284843	31.64722023	-0.01185002	1.727743626	0.482352942	0	46.26	978.8125	655.756	2.5719	1.6112	298	1.902241782	0.004394179	6.249925269	0.014437327
5.296404267	×ÔÉí³µÁ¾	Road 1	24.51870505	31.76720467	-0.010597785	1.651408315	0.458823532	0	46.4437	978.835	655.7562	2.5527	1.6284	299	2.536131272	0.005858463	6.291845278	0.014534163
5.31311153	×ÔÉí³µÁ¾	Road 1	24.6664893	31.8438343	-0.00930275	1.595781088	0.427450985	0	46.5665	978.8496	655.7565	2.5393	1.6398	300	1.808360439	0.004177313	6.322058031	0.014603954
5.329777372	×ÔÉí³µÁ¾	Road 1	24.81424826	31.9175148	-0.008285313	1.532650709	0.403921574	0	46.6896	978.8643	655.7566	2.5269	1.6503	301	1.766299275	0.004080151	6.351494895	0.014671953
5.346392996	×ÔÉí³µÁ¾	Road 1	24.96204039	32.02116737	-0.007407349	1.415230393	0.380392164	0	46.8748	978.8867	655.757	2.5078	1.6684	302	2.272548983	0.005249588	6.389254714	0.014759178
5.363104291	×ÔÉí³µÁ¾	Road 1	25.11098024	32.08509407	-0.00654874	1.331033349	0.349019617	0	46.9986	978.9014	655.7571	2.4954	1.6798	303	1.609184128	0.003717215	6.416146265	0.014821298
5.380369085	×ÔÉí³µÁ¾	Road 1	25.26527448	32.1729435	-0.005859779	1.204440117	0.325490206	0	47.1847	978.9238	655.7574	2.4754	1.6979	304	1.963057783	0.004534663	6.450038054	0.014899588
5.397270256	×ÔÉí³µÁ¾	Road 1	25.41656938	32.22626495	-0.005179697	1.124413729	0.301960796	0	47.309	978.9385	655.7576	2.463	1.7093	305	1.428556243	0.003299965	6.474182327	0.014955361
5.413062962	×ÔÉí³µÁ¾	Road 1	25.55815851	32.27571716	-0.004432229	1.050331593	0.278431386	0	47.4336	978.9531	655.7578	2.4506	1.7207	306	1.423774114	0.003288918	6.496667572	0.015007302
5.430840568	×ÔÉí³µÁ¾	Road 1	25.71787582	32.34306679	-0.00378033	0.945462048	0.262745112	0	47.6207	978.9756	655.7581	2.4315	1.7388	307	1.6093575	0.003717616	6.525278097	0.015073392
5.446948145	×ÔÉí³µÁ¾	Road 1	25.86277157	32.3838089	-0.003160086	0.884044468	0.239215687	0	47.7457	978.9902	655.7583	2.4191	1.7501	308	1.259300019	0.002908983	6.545562369	0.015120249
5.46308358	×ÔÉí³µÁ¾	Road 1	26.00812155	32.43178825	-0.002508891	0.825735152	0.223529413	0	47.8709	979.0059	655.7585	2.4048	1.7635	309	1.385018909	0.003199394	6.567910252	0.015171873
5.479800007	×ÔÉí³µÁ¾	Road 1	26.15890801	32.47292519	-0.001984134	0.746426165	0.20784314	0	48.0588	979.0283	655.7588	2.3858	1.7816	310	1.24272391	0.002870692	6.588684155	0.01521986
5.496648027	×ÔÉí³µÁ¾	Road 1	26.31102685	32.5039856	-0.001515116	0.697883606	0.192156866	0	48.1843	979.043	655.759	2.3734	1.7929	311	1.070416068	0.002472661	6.606718546	0.01526152
5.513081473	×ÔÉí³µÁ¾	Road 1	26.45959505	32.54615936	-0.00108928	0.630440891	0.176470593	0	48.3727	979.0654	655.7593	2.3544	1.812	312	1.274485183	0.002944061	6.627662729	0.015309901
5.529867911	×ÔÉí³µÁ¾	Road 1	26.61147275	32.57151375	-0.000783261	0.587578416	0.160784319	0	48.4984	979.0801	655.7595	2.342	1.8243	313	0.978321746	0.002259923	6.644085267	0.015347837
5.547231676	×ÔÉí³µÁ¾	Road 1	26.76868623	32.59480476	-0.000535858	0.548324049	0.152941182	0	48.6243	979.0947	655.7597	2.3296	1.8357	314	0.931218417	0.002151115	6.660254725	0.015385188
5.563875891	×ÔÉí³µÁ¾	Road 1	26.91952943	32.62608147	-0.00032657	0.490384132	0.145098045	0	48.8132	979.1172	655.76	2.3106	1.8547	315	1.083333279	0.0025025	6.678285957	0.015426841
5.579849309	×ÔÉí³µÁ¾	Road 1	27.06437988	32.64558907	-0.000196961	0.443550378	0.145098045	0	48.9482	979.1338	655.7602	2.2965	1.8689	316	0.898350257	0.002075189	6.692635681	0.015459988
5.596431942	×ÔÉí³µÁ¾	Road 1	27.2148284	32.66156044	-0.000103102	0.402482271	0.145098045	0	49.0743	979.1484	655.7604	2.2841	1.8803	317	0.825823775	0.001907653	6.706330014	0.015491622
5.61314397	×ÔÉí³µÁ¾	Road 1	27.36654598	32.68204651	-5.40E-05	0.35356012	0.145098045	0	49.2636	979.1709	655.7607	2.2651	1.8993	318	0.900304853	0.002079704	6.721375934	0.015526378
5.629825208	×ÔÉí³µÁ¾	Road 1	27.51804299	32.69477005	-2.63E-05	0.329618067	0.145098045	0	49.3989	979.1865	655.7609	2.2519	1.9124	319	0.76976252	0.001778151	6.734216525	0.01555604
5.646396845	×ÔÉí³µÁ¾	Road 1	27.66859471	32.70565338	-1.24E-05	0.313363165	0.145098045	0	49.5252	979.2012	655.7611	2.2396	1.9248	320	0.739969634	0.00170933	6.746479033	0.015584367
5.663075516	×ÔÉí³µÁ¾	Road 1	27.8201694	32.71656761	-5.62E-06	0.301806867	0.145098045	0	49.6605	979.2178	655.7614	2.2254	1.9389	321	0.739448666	0.001708126	6.758812054	0.015612856
5.679875151	×ÔÉí³µÁ¾	Road 1	27.97291771	32.73249092	-3.40E-06	0.293632299	0.152941182	0	49.8682	979.2422	655.7617	2.2048	1.9596	322	0.822638575	0.001900295	6.772632082	0.01564478
5.69674993	×ÔÉí³µÁ¾	Road 1	28.12639382	32.74200096	-2.81E-06	0.293190718	0.152941182	0	49.9946	979.2568	655.7618	2.1924	1.9719	323	0.714100794	0.001649573	6.784682375	0.015672616
5.713282712	×ÔÉí³µÁ¾	Road 1	28.27682564	32.75640678	-2.87E-06	0.295076668	0.152941182	0	50.1843	979.2793	655.7621	2.1734	1.9909	324	0.801379334	0.001851186	6.797931405	0.015703222
5.729719456	×ÔÉí³µÁ¾	Road 1	28.42642827	32.76618805	-3.00E-06	0.299566567	0.160784319	0	50.3109	979.2939	655.7623	2.1611	2.0033	325	0.723330068	0.001670892	6.809820596	0.015730686
5.746537052	×ÔÉí³µÁ¾	Road 1	28.57954407	32.77619934	-3.08E-06	0.305520415	0.160784319	0	50.4374	979.3086	655.7626	2.1487	2.0156	326	0.723515862	0.001671322	6.821988394	0.015758793
5.763138014	×ÔÉí³µÁ¾	Road 1	28.73074876	32.78947906	-3.08E-06	0.312361121	0.168627456	0	50.5731	979.3252	655.7628	2.1346	2.0297	327	0.781658236	0.001805631	6.834964672	0.015788768
5.779707452	×ÔÉí³µÁ¾	Road 1	28.88173052	32.80342827	-3.08E-06	0.324342817	0.176470593	0	50.7631	979.3477	655.7631	2.1156	2.0487	328	0.793743878	0.001833548	6.848116562	0.015819149
5.796410316	×ÔÉí³µÁ¾	Road 1	29.03398092	32.81481628	-3.08E-06	0.336249083	0.184313729	0	50.8898	979.3623	655.7632	2.1032	2.0611	329	0.748540989	0.00172913	6.86061934	0.015848031
5.813117578	×ÔÉí³µÁ¾	Road 1	29.18635639	32.83312912	-3.08E-06	0.357101828	0.192156866	0	51.08	979.3848	655.7635	2.0843	2.0801	330	0.866292935	0.002001137	6.875092724	0.015881464
5.829795517	×ÔÉí³µÁ¾	Road 1	29.33852537	32.84628525	-3.08E-06	0.372846246	0.192156866	0	51.2068	979.3994	655.7637	2.0719	2.0924	331	0.779342202	0.00180028	6.888090545	0.015911489
5.846403443	×ÔÉí³µÁ¾	Road 1	29.49012	32.86025505	-3.08E-06	0.388758302	0.20784314	0	51.3337	979.4141	655.7639	2.0596	2.1048	332	0.794397456	0.001835058	6.901283839	0.015941966
5.863122069	×ÔÉí³µÁ¾	Road 1	29.64279882	32.87613029	-3.08E-06	0.407191157	0.20784314	0	51.4697	979.4307	655.7642	2.0455	2.1189	333	0.825420456	0.001906721	6.915083735	0.015973843
5.880117811	×ÔÉí³µÁ¾	Road 1	29.79812694	32.90125465	-2.87E-06	0.435068727	0.215686277	0	51.6693	979.4541	655.7645	2.0257	2.1387	334	0.976058431	0.002254695	6.931672573	0.016012164
5.897525929	×ÔÉí³µÁ¾	Road 1	29.95730663	32.91836929	-2.65E-06	0.452350616	0.223529413	0	51.7965	979.4688	655.7646	2.0133	2.151	335	0.835642822	0.001930335	6.946219542	0.016045767
5.913683724	×ÔÉí³µÁ¾	Road 1	30.10518254	32.94715004	-2.25E-06	0.472547084	0.23137255	0	51.9963	979.4922	655.765	1.9936	2.1708	336	1.063200914	0.002455994	6.963398524	0.016085451
5.930532478	×ÔÉí³µÁ¾	Road 1	30.25948701	32.96956558	-1.69E-06	0.504894435	0.247058824	0	52.1418	979.5088	655.7652	1.9796	2.1848	337	0.935360894	0.002160684	6.979158189	0.016121855
5.946437716	×ÔÉí³µÁ¾	Road 1	30.40524242	32.99035721	-1.06E-06	0.528336227	0.270588249	0	52.2692	979.5244	655.7654	1.9663	2.1991	338	0.929164727	0.002146371	6.993936775	0.016155994
5.963085963	×ÔÉí³µÁ¾	Road 1	30.5579092	33.01250839	-4.69E-07	0.558000922	0.286274523	0	52.3967	979.5391	655.7656	1.954	2.2114	339	0.936231158	0.002162694	7.009523383	0.016191999
5.979968806	×ÔÉí³µÁ¾	Road 1	30.71290526	33.05046616	-1.38E-07	0.607500494	0.309803933	0	52.5972	979.5625	655.7659	1.9342	2.2312	340	1.198853963	0.002769353	7.029763447	0.016238754
5.998235765	×ÔÉí³µÁ¾	Road 1	30.88072196	33.07283363	-1.22E-08	0.635259032	0.325490206	0	52.7066	979.5752	655.7661	1.9235	2.2419	341	0.907088318	0.002095374	7.046333192	0.01627703
6.01395406	×ÔÉí³µÁ¾	Road 1	31.02531736	33.1170433	1.27E-09	0.689533532	0.349019617	0	52.9075	979.5996	655.7664	1.9028	2.2627	342	1.362003685	0.003146229	7.067741567	0.016326483
6.063126467	×ÔÉí³µÁ¾	Road 1	31.47920886	33.23020935	7.23E-08	0.823580682	0.36470589	0	53.3468	979.6504	655.767	1.86	2.3055	343	1.218239448	0.002814133	7.127645334	0.016464861
6.079983652	×ÔÉí³µÁ¾	Road 1	31.63498493	33.26735001	3.39E-07	0.855795324	0.36470589	0	53.4752	979.666	655.7673	1.8467	2.3188	344	1.191818285	0.0027531	7.147736034	0.01651127
6.096400235	×ÔÉí³µÁ¾	Road 1	31.78686541	33.30593948	3.17E-06	0.882446229	0.372549027	0	53.6038	979.6807	655.7675	1.8344	2.3311	345	1.235236836	0.002853397	7.168014403	0.016558113
6.116808982	×ÔÉí³µÁ¾	Road 1	31.97610447	33.38377075	4.90E-06	0.915182948	0.372549027	0	53.7877	979.7021	655.7678	1.8163	2.3492	346	1.658582844	0.003831326	7.201864	0.016636306
6.132562466	×ÔÉí³µÁ¾	Road 1	32.12237389	33.42561836	6.06E-06	0.943028867	0.372549027	0	53.9812	979.7256	655.7681	1.7964	2.3691	347	1.326834381	0.003064987	7.222766264	0.01668459
6.148517189	×ÔÉí³µÁ¾	Road 1	32.27070084	33.46827278	6.56E-06	0.957384109	0.372549027	0	54.1104	979.7402	655.7682	1.7841	2.3814	348	1.333068099	0.003079387	7.244034996	0.016733721
6.18214395	×ÔÉí³µÁ¾	Road 1	32.58428123	33.57115974	7.12E-06	0.98084116	0.372549027	0	54.4155	979.7764	655.7687	1.7535	2.412	349	1.447425161	0.003343552	7.292707217	0.016846154
6.198491255	×ÔÉí³µÁ¾	Road 1	32.73702749	33.63775063	9.08E-06	0.989484727	0.372549027	0	54.6102	979.7988	655.769	1.7346	2.4309	350	1.744609905	0.004030049	7.321226886	0.016912034
6.21452772	×ÔÉí³µÁ¾	Road 1	32.8870685	33.68246155	2.48E-05	0.993370891	0.372549027	0	54.7403	979.8145	655.7692	1.7214	2.4442	351	1.372998295	0.003171626	7.343244926	0.016962896
6.23026141	×ÔÉí³µÁ¾	Road 1	33.03447286	33.72735443	4.62E-05	0.997096896	0.372549027	0	54.8704	979.8301	655.7694	1.7081	2.4574	352	1.393423495	0.003218808	7.365168618	0.01701354
6.246849908	×ÔÉí³µÁ¾	Road 1	33.1900933	33.77240868	8.39E-05	1.000026703	0.372549027	0	55.0008	979.8447	655.7697	1.6958	2.4697	353	1.354836117	0.003129671	7.387643315	0.017065456
6.263021999	×ÔÉí³µÁ¾	Road 1	33.34211161	33.84014626	0.000138536	1.001466751	0.372549027	0	55.1967	979.8682	655.77	1.676	2.4896	354	1.78689808	0.004127735	7.416541193	0.01713221
6.279692239	×ÔÉí³µÁ¾	Road 1	33.49902195	33.88536873	0.000207688	1.002575159	0.356862754	0	55.3275	979.8838	655.7701	1.6627	2.5028	355	1.35741993	0.00313564	7.43916971	0.017184482
6.296476846	×ÔÉí³µÁ¾	Road 1	33.65732408	33.95299644	0.000290235	0.995640814	0.356862754	0	55.524	979.9063	655.7704	1.6438	2.5217	356	1.745138873	0.004031271	7.468461179	0.017252145
6.313117762	×ÔÉí³µÁ¾	Road 1	33.81447773	33.99771423	0.000410615	0.988528132	0.356862754	0	55.6552	979.9219	655.7706	1.6305	2.5349	357	1.353432324	0.003126429	7.490983532	0.017304172
6.329712492	×ÔÉí³µÁ¾	Road 1	33.97139976	34.04209213	0.000548642	0.982294559	0.356862754	0	55.7866	979.9375	655.7709	1.6173	2.5482	358	1.350989212	0.003120785	7.513402834	0.017355961
6.346369536	×ÔÉí³µÁ¾	Road 1	34.12921621	34.10804443	0.000727833	0.973372161	0.356862754	0	55.984	979.9609	655.7712	1.5974	2.5681	359	1.731239713	0.003999164	7.542240171	0.017422575
6.363130316	×ÔÉí³µÁ¾	Road 1	34.28821871	34.15169106	0.000992466	0.96969825	0.356862754	0	56.1159	979.9756	655.7714	1.5852	2.5803	360	1.333699983	0.003080847	7.564594023	0.017474212
6.379704886	×ÔÉí³µÁ¾	Road 1	34.44565483	34.19515915	0.001297034	0.965161085	0.356862754	0	56.2479	979.9912	655.7715	1.5719	2.5936	361	1.340477417	0.003096503	7.586811859	0.017525535
6.396410682	×ÔÉí³µÁ¾	Road 1	34.60463864	34.26006775	0.001634042	0.962278187	0.356862754	0	56.4462	980.0146	655.7719	1.5521	2.6135	362	1.715744134	0.003963369	7.615474731	0.017591747
6.413023007	×ÔÉí³µÁ¾	Road 1	34.762932	34.30321312	0.002051378	0.960180402	0.356862754	0	56.5786	980.0303	655.7721	1.5388	2.6267	363	1.336249232	0.003086736	7.637672937	0.017643024
6.42987176	×ÔÉí³µÁ¾	Road 1	34.92378027	34.36775093	0.002456852	0.958041668	0.356862754	0	56.7775	980.0537	655.7724	1.519	2.6466	364	1.703891581	0.00393599	7.666381386	0.017709341
6.446397578	×ÔÉí³µÁ¾	Road 1	35.08175694	34.41379051	0.002914384	0.956309855	0.356862754	0	56.9199	980.0703	655.7726	1.505	2.6607	365	1.395649483	0.00322395	7.689445635	0.017762619
6.463059021	×ÔÉí³µÁ¾	Road 1	35.24124284	34.45975456	0.003481941	0.955822289	0.356862754	0	57.0624	980.0869	655.7728	1.4909	2.6747	366	1.389016493	0.003208628	7.712588654	0.01781608
6.479827132	×ÔÉí³µÁ¾	Road 1	35.4019495	34.50263214	0.004053258	0.955049455	0.356862754	0	57.1956	980.1025	655.773	1.4777	2.6879	367	1.330330029	0.003073062	7.734895776	0.017867609
6.496591578	×ÔÉí³µÁ¾	Road 1	35.56292027	34.56689186	0.004678758	0.954328835	0.356862754	0	57.3957	980.126	655.7733	1.4579	2.7078	368	1.712835423	0.00395665	7.763610512	0.01793394
6.513108598	×ÔÉí³µÁ¾	Road 1	35.7217117	34.60970078	0.005371124	0.954586685	0.356862754	0	57.5293	980.1416	655.7736	1.4447	2.721	369	1.343906453	0.003104424	7.785807842	0.017985216
6.529848117	×ÔÉí³µÁ¾	Road 1	35.88284113	34.65248566	0.005946501	0.953392029	0.356862754	0	57.6631	980.1572	655.7737	1.4315	2.7343	370	1.334457911	0.003082598	7.808146027	0.018036817
6.5466012	×ÔÉí³µÁ¾	Road 1	36.04441385	34.71968765	0.006481673	0.953419268	0.356862754	0	57.8736	980.1816	655.774	1.4109	2.7549	371	1.772460865	0.004094385	7.837840209	0.018105411
6.563047475	×ÔÉí³µÁ¾	Road 1	36.20322292	34.76244164	0.007031213	0.952853799	0.356862754	0	58.0078	980.1973	655.7743	1.3977	2.7681	372	1.350860655	0.003120488	7.860056835	0.018156731
6.579695722	×ÔÉí³µÁ¾	Road 1	36.36427862	34.82651939	0.007445684	0.952671647	0.356862754	0	58.2095	980.2207	655.7746	1.3779	2.7879	373	1.728216157	0.003992179	7.888828605	0.018223194
6.596426078	×ÔÉí³µÁ¾	Road 1	36.52632715	34.86923561	0.007778681	0.952789426	0.356862754	0	58.3441	980.2363	655.7748	1.3647	2.8021	374	1.340117735	0.003095672	7.911249251	0.018274986
6.61309082	×ÔÉí³µÁ¾	Road 1	36.68793786	34.91194496	0.008025663	0.952421546	0.356862754	0	58.4789	980.252	655.775	1.3515	2.8153	375	1.344299256	0.003105331	7.933651652	0.018326735
6.62970571	×ÔÉí³µÁ¾	Road 1	36.84926212	34.95462685	0.008117762	0.951903999	0.356862754	0	58.6138	980.2676	655.7752	1.3383	2.8285	376	1.347399248	0.003112492	7.956038543	0.018378449
6.646368986	×ÔÉí³µÁ¾	Road 1	37.01138086	35.02477455	0.008125161	0.952174485	0.356862754	0	58.8359	980.293	655.7755	1.317	2.8499	377	1.845350206	0.004262759	7.986788123	0.018449481
6.663031896	×ÔÉí³µÁ¾	Road 1	37.1736936	35.06745644	0.008125161	0.951294839	0.356862754	0	58.9713	980.3086	655.7758	1.3038	2.8641	378	1.348539538	0.003115126	8.009258715	0.018501388
6.679743191	×ÔÉí³µÁ¾	Road 1	37.33667566	35.11011086	0.008125161	0.951851666	0.356862754	0	59.1069	980.3242	655.7759	1.2906	2.8772	379	1.347068485	0.003111728	8.031769974	0.018553389
6.696409033	×ÔÉí³µÁ¾	Road 1	37.49952478	35.17715149	0.008125161	0.951507211	0.356862754	0	59.3203	980.3486	655.7762	1.2701	2.8977	380	1.795316764	0.004147182	8.061690439	0.018622505
6.713028689	×ÔÉí³µÁ¾	Road 1	37.66211953	35.21980934	0.008125161	0.951041937	0.356862754	0	59.4563	980.3633	655.7764	1.2579	2.9109	381	1.354685269	0.003129323	8.084204842	0.018674513
6.729726787	×ÔÉí³µÁ¾	Road 1	37.82569358	35.265485	0.008125161	0.951189458	0.356862754	0	59.6022	980.3809	655.7767	1.2439	2.9258	382	1.407391334	0.003251074	8.107705602	0.0187288
6.747625358	×ÔÉí³µÁ¾	Road 1	38.0013608	35.3325428	0.008125161	0.953126609	0.36470589	0	59.8166	980.4043	655.777	1.2243	2.9463	383	1.717704256	0.003967897	8.138450052	0.01879982
6.76311712	×ÔÉí³µÁ¾	Road 1	38.15359034	35.37533798	0.008125161	0.95584172	0.36470589	0	59.9532	980.4199	655.7772	1.2112	2.9594	384	1.419146256	0.003278228	8.160435129	0.018850605
6.779734943	×ÔÉí³µÁ¾	Road 1	38.31708336	35.41829109	0.008125161	0.959392428	0.372549027	0	60.09	980.4355	655.7774	1.198	2.9735	385	1.366150006	0.003155807	8.183137568	0.018903048
6.796341037	×ÔÉí³µÁ¾	Road 1	38.48076041	35.48320313	0.008125161	0.968296289	0.372549027	0	60.2955	980.459	655.7777	1.1783	2.9932	386	1.773537355	0.004096871	8.212589095	0.018971081
6.813220581	×ÔÉí³µÁ¾	Road 1	38.64735224	35.53002205	0.008125161	0.975197017	0.380392164	0	60.4425	980.4756	655.778	1.1644	3.0081	387	1.427449292	0.003297408	8.236683788	0.01902674
6.829711209	×ÔÉí³µÁ¾	Road 1	38.81030753	35.57408752	0.008125161	0.983370423	0.380392164	0	60.5799	980.4912	655.7781	1.1513	3.0212	388	1.397679472	0.00322864	8.2597324	0.019079982
6.846422137	×ÔÉí³µÁ¾	Road 1	38.97574999	35.64091873	0.008125161	0.994841099	0.380392164	0	60.7863	980.5146	655.7784	1.1316	3.0419	389	1.807853508	0.004176142	8.289943311	0.019149769
6.863005504	×ÔÉí³µÁ¾	Road 1	39.14013693	35.68593864	0.008125161	1.001322985	0.380392164	0	60.9241	980.5303	655.7786	1.1185	3.055	390	1.414254003	0.003266927	8.313396404	0.019203946
6.879888347	×ÔÉí³µÁ¾	Road 1	39.30781246	35.75416031	0.008125161	1.010572672	0.388235301	0	61.1312	980.5527	655.7789	1.1008	3.0747	391	1.825476592	0.004216851	8.344215638	0.019275138
6.896380075	×ÔÉí³µÁ¾	Road 1	39.47181344	35.79998016	0.008125161	1.018111825	0.396078438	0	61.2695	980.5684	655.7792	1.0876	3.0878	392	1.437468386	0.003320552	8.367921976	0.0193299
6.914798788	×ÔÉí³µÁ¾	Road 1	39.65533322	35.86956482	0.008143676	1.032324433	0.396078438	0	61.4772	980.5918	655.7794	1.068	3.1084	393	1.748947797	0.004040069	8.400135344	0.019404313
6.931281352	×ÔÉí³µÁ¾	Road 1	39.81977679	35.91655197	0.008229209	1.04107666	0.403921574	0	61.616	980.6074	655.7797	1.0549	3.1225	394	1.463606609	0.003380931	8.424259333	0.019460039
6.94672253	×ÔÉí³µÁ¾	Road 1	39.97403439	35.96405411	0.008421001	1.051478267	0.411764711	0	61.7549	980.623	655.7798	1.0418	3.1356	395	1.535213339	0.003546343	8.447964836	0.019514799
6.963040143	×ÔÉí³µÁ¾	Road 1	40.13728124	36.01560059	0.008712302	1.065095544	0.419607848	0	61.9039	980.6396	655.7801	1.0279	3.1494	396	1.562627175	0.003609669	8.473463182	0.0195737
6.979775998	×ÔÉí³µÁ¾	Road 1	40.30505428	36.08916092	0.009121703	1.088284254	0.427450985	0	62.113	980.6621	655.7804	1.0092	3.1691	397	1.950132739	0.004504807	8.506100319	0.019649092
6.996421312	×ÔÉí³µÁ¾	Road 1	40.47215116	36.13922424	0.009672	1.104926229	0.427450985	0	62.2526	980.6777	655.7806	0.9962	3.1831	398	1.519765093	0.003510657	8.531397287	0.019707528
7.013017509	×ÔÉí³µÁ¾	Road 1	40.63898956	36.19011497	0.010492124	1.120891929	0.435294122	0	62.3924	980.6934	655.7808	0.9841	3.1962	399	1.539836418	0.003557022	8.556952715	0.019766561
7.029778655	×ÔÉí³µÁ¾	Road 1	40.80784834	36.26790161	0.011343472	1.144426107	0.443137258	0	62.6024	980.7168	655.7811	0.9644	3.2168	400	2.035100818	0.004701083	8.591063338	0.019845356
7.046428002	×ÔÉí³µÁ¾	Road 1	40.97582539	36.32078705	0.012244535	1.161259413	0.450980395	0	62.7427	980.7314	655.7813	0.9524	3.2289	401	1.578796711	0.00364702	8.617349272	0.019906077
7.063074416	×ÔÉí³µÁ¾	Road 1	41.14405704	36.38224525	0.013304868	1.180457354	0.458823532	0	62.9033	980.75	655.7815	0.9367	3.2455	402	1.742804059	0.004025877	8.646360711	0.019973093
7.079704336	×ÔÉí³µÁ¾	Road 1	41.31239307	36.44092941	0.014289508	1.199638724	0.458823532	0	63.0542	980.7656	655.7817	0.9238	3.2583	403	1.693839462	0.003912769	8.674529124	0.020038162
7.096351117	×ÔÉí³µÁ¾	Road 1	41.48130614	36.5288063	0.015259525	1.225273967	0.458823532	0	63.2758	980.79	655.782	0.9035	3.2797	404	2.2485609	0.005194176	8.711960425	0.020124629
7.113074508	×ÔÉí³µÁ¾	Road 1	41.65127981	36.58978043	0.016254846	1.239894629	0.458823532	0	63.4273	980.8066	655.7822	0.8896	3.2945	405	1.736532895	0.004011391	8.741001144	0.020191713
7.129669971	×ÔÉí³µÁ¾	Road 1	41.82021835	36.64729042	0.017476853	1.24963212	0.458823532	0	63.5689	980.8223	655.7825	0.8766	3.3076	406	1.681684223	0.003884691	8.768909473	0.020256181
7.14646704	×ÔÉí³µÁ¾	Road 1	41.99161538	36.73434334	0.018578218	1.260216713	0.458823532	0	63.7817	980.8447	655.7827	0.859	3.3271	407	2.229024314	0.005149046	8.806350548	0.02034267
7.163062137	×ÔÉí³µÁ¾	Road 1	42.16125936	36.80112991	0.019684836	1.266445875	0.458823532	0	63.9442	980.8623	655.783	0.8443	3.3427	408	1.864991789	0.004308131	8.837300267	0.020414164
7.179846376	×ÔÉí³µÁ¾	Road 1	42.33311032	36.85978661	0.020896997	1.269314289	0.458823532	0	64.0866	980.877	655.7832	0.8323	3.3548	409	1.699023362	0.003924744	8.865817082	0.020480037
7.196405917	×ÔÉí³µÁ¾	Road 1	42.50306635	36.94798622	0.021927604	1.270974517	0.458823532	0	64.3007	980.9004	655.7834	0.8127	3.3763	410	2.286021776	0.00528071	8.903672552	0.020567484
7.213098517	×ÔÉí³µÁ¾	Road 1	42.67466115	37.00689354	0.023043409	1.273327112	0.458823532	0	64.4437	980.915	655.7837	0.8007	3.3884	411	1.71553537	0.003962887	8.932309299	0.020633634
7.229815311	×ÔÉí³µÁ¾	Road 1	42.84677833	37.06583176	0.023990231	1.27327466	0.458823532	0	64.587	980.9297	655.7838	0.7887	3.4014	412	1.716747734	0.003965687	8.961007816	0.020699928
7.246408574	×ÔÉí³µÁ¾	Road 1	43.01803138	37.1542923	0.024939187	1.274123311	0.458823532	0	64.8023	980.9521	655.7841	0.7711	3.421	413	2.298687915	0.005309969	8.999150551	0.020788038
7.263043259	×ÔÉí³µÁ¾	Road 1	43.19000396	37.21749458	0.025969004	1.274247766	0.458823532	0	64.9564	980.9688	655.7844	0.7573	3.4358	414	1.810451946	0.004182144	9.029266848	0.020857606
7.279659983	×ÔÉí³µÁ¾	Road 1	43.36206308	37.276474	0.026812976	1.273645997	0.458823532	0	65.1005	980.9834	655.7845	0.7453	3.4488	415	1.732436036	0.004001927	9.058054258	0.020924105
7.296475013	×ÔÉí³µÁ¾	Road 1	43.53658871	37.36492081	0.02755793	1.272966385	0.458823532	0	65.3171	981.0059	655.7848	0.7268	3.4693	416	2.287090339	0.005283179	9.096511752	0.021012942
7.313033087	×ÔÉí³µÁ¾	Road 1	43.70871857	37.42388649	0.028163733	1.273105025	0.458823532	0	65.4618	981.0205	655.785	0.7157	3.4823	417	1.741899271	0.004023787	9.125354249	0.021079568
7.329917763	×ÔÉí³µÁ¾	Road 1	43.88465846	37.5123333	0.028683875	1.273017645	0.458823532	0	65.6793	981.042	655.7853	0.6982	3.5009	418	2.287912528	0.005285078	9.163984911	0.021168805
7.346394829	×ÔÉí³µÁ¾	Road 1	44.05662088	37.57129555	0.028993828	1.272338152	0.458823532	0	65.8246	981.0566	655.7855	0.6862	3.5148	419	1.753195091	0.004049881	9.192872421	0.021235535
7.363645694	×ÔÉí³µÁ¾	Road 1	44.23694158	37.6302578	0.029193019	1.27296567	0.466666669	0	65.9701	981.0713	655.7856	0.6752	3.5278	420	1.703318971	0.003934667	9.222256148	0.021303412
7.37980239	×ÔÉí³µÁ¾	Road 1	44.40622272	37.7188591	0.029227754	1.276979923	0.466666669	0	66.1889	981.0928	655.7859	0.6577	3.5473	421	2.378823306	0.005495082	9.260690071	0.021392194
7.396403351	×ÔÉí³µÁ¾	Road 1	44.58043209	37.77815781	0.029227754	1.28084445	0.466666669	0	66.335	981.1064	655.7861	0.6467	3.5593	422	1.759095358	0.00406351	9.289892746	0.021459652
7.413048299	×ÔÉí³µÁ¾	Road 1	44.75539785	37.84191628	0.029210383	1.283716321	0.466666669	0	66.4813	981.1211	655.7863	0.6357	3.5733	423	1.845954831	0.004264156	9.320618568	0.021530629
7.431931073	×ÔÉí³µÁ¾	Road 1	44.95433426	37.92721825	0.029201699	1.288971782	0.466666669	0	66.7013	981.1426	655.7866	0.6182	3.5928	424	2.07399105	0.004790919	9.359781272	0.021621095
7.44844736	×ÔÉí³µÁ¾	Road 1	45.12861382	37.98713493	0.029201699	1.292118192	0.466666669	0	66.8483	981.1563	655.7867	0.6072	3.6048	425	1.7854427	0.004124373	9.389270156	0.021689214
7.464586461	×ÔÉí³µÁ¾	Road 1	45.29933633	38.08149033	0.029262517	1.294528604	0.466666669	0	67.0797	981.1777	655.787	0.5909	3.625	426	2.517846874	0.005816226	9.42990594	0.021783083
7.479687841	×ÔÉí³µÁ¾	Road 1	45.45933393	38.14163704	0.029332124	1.295830131	0.466666669	0	67.2273	981.1924	655.7872	0.579	3.638	427	1.908449381	0.004408518	9.45872616	0.021849657
7.49637421	×ÔÉí³µÁ¾	Road 1	45.63640338	38.20184212	0.02939312	1.296536803	0.466666669	0	67.3751	981.2061	655.7874	0.569	3.651	428	1.787342723	0.004128762	9.48855042	0.021918551
7.514222928	×ÔÉí³µÁ¾	Road 1	45.82625537	38.29222527	0.029497882	1.297628522	0.466666669	0	67.5973	981.2266	655.7876	0.5525	3.6694	429	2.271580774	0.005247352	9.529095226	0.02201221
7.530521848	×ÔÉí³µÁ¾	Road 1	45.99989549	38.35250931	0.029681815	1.297607183	0.466666669	0	67.7457	981.2402	655.7878	0.5425	3.6824	430	1.823220633	0.00421164	9.558811752	0.022080855
7.546359639	×ÔÉí³µÁ¾	Road 1	46.16888819	38.41278648	0.029954728	1.298045039	0.466666669	0	67.8943	981.2539	655.788	0.5316	3.6953	431	1.861192978	0.004299356	9.588288938	0.022148947
7.563479644	×ÔÉí³µÁ¾	Road 1	46.35199252	38.50323486	0.030255971	1.298060894	0.466666669	0	68.1178	981.2744	655.7882	0.5152	3.7138	432	2.35535732	0.005440875	9.628612667	0.022242095
7.579814852	×ÔÉí³µÁ¾	Road 1	46.52697678	38.56353264	0.030586082	1.298172712	0.466666669	0	68.267	981.2871	655.7884	0.5062	3.7257	433	1.82915056	0.004225338	9.658492223	0.022311117
7.596423878	×ÔÉí³µÁ¾	Road 1	46.70531136	38.65395355	0.030936627	1.297294617	0.466666669	0	68.4914	981.3076	655.7886	0.4897	3.7451	434	2.417091738	0.005583482	9.698637762	0.022403853
7.613059663	×ÔÉí³µÁ¾	Road 1	46.88421184	38.71423759	0.031353522	1.297885656	0.466666669	0	68.6413	981.3203	655.7888	0.4808	3.7561	435	1.812558114	0.004187009	9.728791087	0.022473507
7.629666855	×ÔÉí³µÁ¾	Road 1	47.06308287	38.7745079	0.031737417	1.297362685	0.466666669	0	68.7914	981.334	655.7889	0.4698	3.769	436	1.81672658	0.004196638	9.758961816	0.022543202
7.646353591	×ÔÉí³µÁ¾	Road 1	47.24322963	38.86490135	0.032087445	1.296770453	0.466666669	0	68.9417	981.3467	655.7892	0.4609	3.782	437	2.419600091	0.005589276	9.799337043	0.022636469
7.663042526	×ÔÉí³µÁ¾	Road 1	47.42369943	38.9294632	0.03242141	1.297132969	0.466666669	0	69.1785	981.3672	655.7894	0.4447	3.7992	438	1.903189222	0.004396367	9.831099244	0.022709839
7.679669146	×ÔÉí³µÁ¾	Road 1	47.60377366	38.98971634	0.032767061	1.297009349	0.466666669	0	69.3295	981.3799	655.7896	0.4357	3.8111	439	1.82337497	0.004211996	9.861415808	0.022779871
7.696399136	×ÔÉí³µÁ¾	Road 1	47.78540726	39.08436356	0.033049118	1.296416044	0.466666669	0	69.5672	981.4004	655.7898	0.4195	3.8303	440	2.512533096	0.005803951	9.90345046	0.022876971
7.713017325	×ÔÉí³µÁ¾	Road 1	47.96610508	39.1445858	0.033256982	1.296736598	0.466666669	0	69.7188	981.4131	655.7899	0.4106	3.8422	441	1.829423084	0.004225967	9.933852159	0.022947198
7.729752446	×ÔÉí³µÁ¾	Road 1	48.14835437	39.20482178	0.03345621	1.296251893	0.466666669	0	69.8706	981.4258	655.7901	0.4007	3.8541	442	1.823483381	0.004212247	9.964368374	0.023017691
7.746369536	×ÔÉí³µÁ¾	Road 1	48.32973519	39.29514313	0.033570413	1.295936346	0.466666669	0	70.0988	981.4443	655.7903	0.3872	3.8705	443	2.449319052	0.005657927	10.00506893	0.023111709
7.763036844	×ÔÉí³µÁ¾	Road 1	48.5119629	39.35967064	0.033665776	1.29642725	0.466666669	0	70.2622	981.458	655.7905	0.3766	3.8832	444	1.92192442	0.004439645	10.03710224	0.023185706
7.779855907	×ÔÉí³µÁ¾	Road 1	48.69613111	39.41988945	0.033837892	1.296016932	0.474509805	0	70.4149	981.4697	655.7906	0.3676	3.8941	445	1.825383779	0.004216637	10.06780348	0.023256626
7.796365596	×ÔÉí³µÁ¾	Road 1	48.87732659	39.51035843	0.034049049	1.300696015	0.474509805	0	70.6444	981.4883	655.7909	0.3542	3.9115	446	2.476208057	0.005720041	10.1086849	0.023351062
7.81308019	×ÔÉí³µÁ¾	Road 1	49.06105202	39.57089996	0.034377106	1.304542661	0.474509805	0	70.7977	981.501	655.791	0.3443	3.9234	447	1.845470249	0.004263036	10.13953119	0.023422317
7.829777555	×ÔÉí³µÁ¾	Road 1	49.24486959	39.63159599	0.034814529	1.307255626	0.474509805	0	70.9512	981.5127	655.7911	0.3364	3.9343	448	1.85228538	0.004278779	10.17045948	0.023493761
7.846365687	×ÔÉí³µÁ¾	Road 1	49.42790565	39.72296791	0.035413384	1.312460065	0.474509805	0	71.182	981.5303	655.7914	0.324	3.9506	449	2.49768778	0.005769659	10.21189145	0.023589469
7.863039227	×ÔÉí³µÁ¾	Road 1	49.61218723	39.78841209	0.036059026	1.314357638	0.474509805	0	71.3472	981.543	655.7915	0.3143	3.9623	450	1.957979752	0.004522933	10.2445379	0.023664883
7.879759319	×ÔÉí³µÁ¾	Road 1	49.79726742	39.84958191	0.036752932	1.3153373	0.474509805	0	71.5016	981.5547	655.7916	0.3054	3.9732	451	1.868871928	0.004317094	10.27578562	0.023737065
7.896334988	×ÔÉí³µÁ¾	Road 1	49.98117192	39.94144821	0.037240863	1.317350268	0.474509805	0	71.7337	981.5723	655.7919	0.2931	3.9895	452	2.521486654	0.005824634	10.31758094	0.023833612
7.913092469	×ÔÉí³µÁ¾	Road 1	50.16737898	40.00275536	0.037661042	1.317411065	0.474509805	0	71.8888	981.584	655.792	0.2851	4.0004	453	1.8749151	0.004331054	10.3489998	0.02390619
7.929808896	×ÔÉí³µÁ¾	Road 1	50.35355707	40.09475899	0.038074009	1.318081975	0.474509805	0	72.1218	981.6006	655.7922	0.2728	4.0157	454	2.516710428	0.005813601	10.3910702	0.024003372
7.946412423	×ÔÉí³µÁ¾	Road 1	50.5387607	40.15611076	0.038416967	1.318257213	0.474509805	0	72.2775	981.6123	655.7924	0.2649	4.0266	455	1.893651047	0.004374334	10.42251149	0.024076002
7.963109056	×ÔÉí³µÁ¾	Road 1	50.72528748	40.21747627	0.038699098	1.318959951	0.474509805	0	72.4333	981.623	655.7925	0.257	4.0365	456	1.889217378	0.004364092	10.45405506	0.024148867
7.980096734	×ÔÉí³µÁ¾	Road 1	50.91550013	40.3095417	0.038993135	1.318204641	0.474509805	0	72.6677	981.6396	655.7926	0.2456	4.0518	457	2.499282051	0.005773342	10.49651206	0.024246943
7.996347635	×ÔÉí³µÁ¾	Road 1	51.09775992	40.37531548	0.039172381	1.318506002	0.474509805	0	72.8354	981.6514	655.7928	0.237	4.0625	458	2.025106179	0.004677995	10.52942186	0.024322964
8.013003946	×ÔÉí³µÁ¾	Road 1	51.28485055	40.43670158	0.039309822	1.31866467	0.474509805	0	72.9922	981.6621	655.7929	0.2301	4.0724	459	1.9014238	0.004392289	10.56109256	0.024396124
8.029831439	×ÔÉí³µÁ¾	Road 1	51.47429448	40.52880135	0.039352175	1.318047404	0.474509805	0	73.2278	981.6777	655.7931	0.2197	4.0867	460	2.530018319	0.005844342	10.60366643	0.024494469
8.046343694	×ÔÉí³µÁ¾	Road 1	51.66047103	40.59019089	0.039383959	1.318181992	0.474509805	0	73.3852	981.6885	655.7932	0.2119	4.0975	461	1.918848996	0.004432541	10.63535095	0.024567661
8.063002571	×ÔÉí³µÁ¾	Road 1	51.84858483	40.65158043	0.03940516	1.318466306	0.474509805	0	73.5428	981.6992	655.7933	0.204	4.1074	462	1.90981191	0.004411666	10.66716628	0.024641154
8.079709101	×ÔÉí³µÁ¾	Road 1	52.03766426	40.74370766	0.039415762	1.318399787	0.474509805	0	73.7798	981.7148	655.7935	0.1937	4.1217	463	2.556369885	0.005905214	10.70987434	0.02473981
8.096322892	×ÔÉí³µÁ¾	Road 1	52.22597883	40.80540276	0.039436974	1.356235385	0.474509805	0	73.938	981.7246	655.7936	0.1878	4.1305	464	1.925906839	0.004448845	10.74187096	0.024813722
8.113031254	×ÔÉí³µÁ¾	Road 1	52.4157997	40.89898911	0.039436974	1.312650084	0.474509805	0	74.1759	981.7393	655.7938	0.1785	4.1448	465	2.595560243	0.005995744	10.78523852	0.024913901
8.129689399	×ÔÉí³µÁ¾	Road 1	52.60532886	40.95924225	0.039436974	1.277996778	0.474509805	0	74.3348	981.749	655.7939	0.1716	4.1536	466	1.897948689	0.004384261	10.81685482	0.024986935
8.146385298	×ÔÉí³µÁ¾	Road 1	52.7955584	41.01763802	0.039436974	1.239730358	0.482352942	0	74.4939	981.7588	655.794	0.1657	4.1625	467	1.85795376	0.004291873	10.84787503	0.025058591
8.163035745	×ÔÉí³µÁ¾	Road 1	52.98566093	41.10214691	0.039436974	1.195119619	0.490196079	0	74.7331	981.7725	655.7941	0.1564	4.1757	468	2.420657065	0.005591718	10.88818005	0.025151696
8.179830248	×ÔÉí³µÁ¾	Road 1	53.17773638	41.17249718	0.039436974	1.166859508	0.490196079	0	74.9386	981.7832	655.7943	0.1504	4.1857	469	2.109411988	0.004872742	10.92360658	0.025233531
8.196315378	×ÔÉí³µÁ¾	Road 1	53.36653653	41.22991791	0.039436974	1.151211977	0.498039216	0	75.1101	981.791	655.7943	0.1467	4.1934	470	1.860898795	0.004298676	10.95428374	0.025304395
8.213004313	×ÔÉí³µÁ¾	Road 1	53.55793604	41.28712921	0.039436974	1.150115848	0.505882382	0	75.2819	981.7979	655.7944	0.144	4.201	471	1.843428067	0.004258319	10.98504859	0.025375462
8.229711209	×ÔÉí³µÁ¾	Road 1	53.74979307	41.34132957	0.039436974	1.165191054	0.513725519	0	75.4426	981.8047	655.7944	0.1401	4.2079	472	1.779838456	0.004111427	11.01478416	0.025444151
8.246357623	×ÔÉí³µÁ¾	Road 1	53.9413454	41.42564278	0.039436974	1.211690545	0.521568656	0	75.684	981.8125	655.7945	0.1386	4.2172	473	2.43360199	0.005621621	11.05529491	0.025537731
8.262981678	×ÔÉí³µÁ¾	Road 1	54.1329322	41.48882446	0.039436974	1.255132318	0.521568656	0	75.8568	981.8174	655.7946	0.1379	4.2238	474	1.984347469	0.004583843	11.08828281	0.025613933
8.27962296	×ÔÉí³µÁ¾	Road 1	54.325001	41.55014191	0.039436974	1.291507483	0.521568656	0	76.0183	981.8213	655.7946	0.1379	4.2297	475	1.945261377	0.004493554	11.12065446	0.025688712
8.29631886	×ÔÉí³µÁ¾	Road 1	54.51812388	41.64150352	0.039436974	1.328851342	0.529411793	0	76.1801	981.8252	655.7946	0.139	4.2386	476	2.590934251	0.005985058	11.16391243	0.025788638
8.313123993	×ÔÉí³µÁ¾	Road 1	54.71284296	41.7127739	0.039436974	1.384825349	0.529411793	0	76.4233	981.8301	655.7946	0.1395	4.2459	477	2.151921267	0.004970938	11.20007576	0.025872175
8.329663373	×ÔÉí³µÁ¾	Road 1	54.90479715	41.78119469	0.039436974	1.417038798	0.529411793	0	76.5857	981.834	655.7946	0.1405	4.2528	478	2.117439616	0.004891286	11.2350969	0.025953074
8.347900641	×ÔÉí³µÁ¾	Road 1	55.11701639	41.89165192	0.03940516	1.457003236	0.529411793	0	76.8415	981.8389	655.7946	0.1423	4.2638	479	2.81561126	0.006504062	11.28644595	0.02607169
8.363656324	×ÔÉí³µÁ¾	Road 1	55.30067218	41.96332397	0.039383959	1.477097154	0.529411793	0	77.0046	981.8418	655.7946	0.1444	4.2716	480	2.274636802	0.005254411	11.32228441	0.026154477
8.380376783	×ÔÉí³µÁ¾	Road 1	55.49607996	42.07229118	0.039352175	1.501470804	0.53725493	0	77.2498	981.8457	655.7946	0.1479	4.2819	481	2.993661023	0.006915357	11.3723398	0.026270105
8.396410682	×ÔÉí³µÁ¾	Road 1	55.68379108	42.14570732	0.039320406	1.517240047	0.53725493	0	77.4136	981.8486	655.7946	0.149	4.2887	482	2.294050581	0.005299257	11.40912237	0.026355073
8.413053065	×ÔÉí³µÁ¾	Road 1	55.87896742	42.21960754	0.039278075	1.529365897	0.53725493	0	77.5777	981.8516	655.7946	0.151	4.2956	483	2.247115141	0.005190836	11.44651972	0.026441461
8.429818976	×ÔÉí³µÁ¾	Road 1	56.07611052	42.33084068	0.039214637	1.545865536	0.53725493	0	77.8243	981.8564	655.7946	0.1526	4.3068	484	3.053091085	0.00705264	11.49770758	0.026559705
8.446938248	×ÔÉí³µÁ¾	Road 1	56.27776112	42.4049675	0.03916182	1.545783639	0.53725493	0	77.9891	981.8594	655.7946	0.1547	4.3126	485	2.215220807	0.00511716	11.53563054	0.026647307
8.462958218	×ÔÉí³µÁ¾	Road 1	56.4667918	42.47888489	0.039087962	1.545659423	0.53725493	0	78.1541	981.8623	655.7946	0.1557	4.3184	486	2.322752396	0.005365558	11.57284097	0.026733263
8.479795608	×ÔÉí³µÁ¾	Road 1	56.66598444	42.58934898	0.039035261	1.545027256	0.53725493	0	78.4023	981.8672	655.7946	0.1574	4.3276	487	3.042803477	0.007028876	11.62407384	0.026851611
8.496360281	×ÔÉí³µÁ¾	Road 1	56.86228837	42.66273079	0.038982607	1.543180346	0.53725493	0	78.568	981.8691	655.7946	0.1604	4.3315	488	2.263721264	0.005229196	11.66157164	0.02693823
8.51295831	×ÔÉí³µÁ¾	Road 1	57.0593251	42.73593063	0.038919486	1.542153239	0.53725493	0	78.7341	981.8721	655.7946	0.1615	4.3353	489	2.259765897	0.005220059	11.6990793	0.027024873
8.529651277	×ÔÉí³µÁ¾	Road 1	57.25802075	42.85064163	0.03884593	1.540857196	0.53725493	0	78.9956	981.876	655.7946	0.1634	4.3414	490	3.174607613	0.007333344	11.75207292	0.027147288
8.546351942	×ÔÉí³µÁ¾	Road 1	57.45714597	42.92348785	0.038761981	1.540062308	0.545098066	0	79.1624	981.8779	655.7945	0.1654	4.3432	491	2.25048674	0.005198624	11.78965754	0.027234109
8.563004587	×ÔÉí³µÁ¾	Road 1	57.65620421	43.03278122	0.038678154	1.544781566	0.545098066	0	79.4131	981.8809	655.7945	0.1681	4.3465	492	3.072348203	0.007097124	11.84082027	0.027352295
8.579643671	×ÔÉí³µÁ¾	Road 1	57.85543774	43.10578194	0.03858399	1.547631383	0.545098066	0	79.5807	981.8818	655.7945	0.1711	4.3474	493	2.268237842	0.005239629	11.87856167	0.027439477
8.596331506	×ÔÉí³µÁ¾	Road 1	58.05559412	43.17893715	0.038489982	1.551387668	0.545098066	0	79.7484	981.8838	655.7944	0.1732	4.3493	494	2.270250601	0.005244279	11.91644724	0.027526993
8.613040968	×ÔÉí³µÁ¾	Road 1	58.25635005	43.25221939	0.038344048	1.554560304	0.552941203	0	79.9165	981.8848	655.7944	0.1753	4.3491	495	2.274314614	0.005253667	11.95444981	0.027614779
8.629634232	×ÔÉí³µÁ¾	Road 1	58.45626712	43.3731102	0.03815696	1.565089941	0.56078434	0	80.1933	981.8867	655.7944	0.1794	4.35	496	3.364373103	0.007771702	12.01027574	0.027743737
8.64637925	×ÔÉí³µÁ¾	Road 1	58.65835708	43.44718208	0.037980828	1.573746324	0.56078434	0	80.3621	981.8887	655.7944	0.1814	4.3518	497	2.297402598	0.005307	12.04874579	0.027832603
8.663052423	×ÔÉí³µÁ¾	Road 1	58.86009858	43.55916023	0.037753697	1.588567734	0.568627477	0	80.6159	981.8896	655.7943	0.1838	4.3499	498	3.163721278	0.007308196	12.10149506	0.027954454
8.679675744	×ÔÉí³µÁ¾	Road 1	59.06160955	43.63986511	0.037435189	1.600524306	0.568627477	0	80.7976	981.8906	655.7943	0.1842	4.3467	499	2.468686275	0.005702665	12.14253283	0.028049251
8.696367245	×ÔÉí³µÁ¾	Road 1	59.26429879	43.71573601	0.037108291	1.610223055	0.568627477	0	80.9675	981.8916	655.7943	0.1834	4.3436	500	2.35575968	0.005441805	12.18185399	0.028140083
8.713020258	×ÔÉí³µÁ¾	Road 1	59.46687373	43.79206352	0.036722578	1.619143486	0.568627477	0	81.1376	981.8926	655.7942	0.1835	4.3416	501	2.373682914	0.005483208	12.22138296	0.028231395
8.729631116	×ÔÉí³µÁ¾	Road 1	59.66949274	43.91274834	0.036229167	1.629592419	0.576470613	0	81.4057	981.8926	655.7941	0.1845	4.3358	502	3.394928935	0.007842286	12.27777565	0.028361662
8.746315652	×ÔÉí³µÁ¾	Road 1	59.87336842	43.98998222	0.035750132	1.636893868	0.576470613	0	81.5766	981.8936	655.7941	0.1847	4.3327	503	2.400388296	0.005544897	12.31782501	0.028454176
8.762989559	×ÔÉí³µÁ¾	Road 1	60.07747368	44.06759377	0.035226125	1.644299388	0.576470613	0	81.7479	981.8936	655.7941	0.1859	4.3296	504	2.413830117	0.005575948	12.35807299	0.028547149
8.779638172	×ÔÉí³µÁ¾	Road 1	60.28183628	44.19018745	0.03460994	1.653647184	0.58431375	0	82.0176	981.8945	655.794	0.1859	4.3248	505	3.451888725	0.007973863	12.41554215	0.028679902
8.796370361	×ÔÉí³µÁ¾	Road 1	60.48758929	44.2686161	0.034010589	1.660532951	0.58431375	0	82.1896	981.8945	655.7939	0.1861	4.3207	506	2.435932172	0.005627003	12.45630063	0.028774054
8.813859488	×ÔÉí³µÁ¾	Road 1	60.70325251	44.39258652	0.033275921	1.672233224	0.58431375	0	82.4605	981.8945	655.7938	0.1881	4.3148	507	3.360880425	0.007763634	12.51507949	0.028909834
8.829640097	×ÔÉí³µÁ¾	Road 1	60.89819533	44.47193184	0.03236559	1.678245783	0.58431375	0	82.6333	981.8945	655.7938	0.1883	4.3117	508	2.576566979	0.00595187	12.55573929	0.029003758
8.882246769	×ÔÉí³µÁ¾	Road 1	61.55198305	44.7402523	0.031508531	1.697976232	0.592156887	0	83.2158	981.8926	655.7936	0.1931	4.2972	509	2.614145659	0.006038676	12.69326079	0.029321432
8.898368275	×ÔÉí³µÁ¾	Road 1	61.7529062	44.86698303	0.030621914	1.705977798	0.592156887	0	83.4896	981.8916	655.7935	0.1961	4.2903	510	3.692669484	0.008530067	12.75279219	0.02945895
8.91303492	×ÔÉí³µÁ¾	Road 1	61.93602716	44.94793854	0.027624808	1.711396337	0.600000024	0	83.6642	981.8906	655.7935	0.1974	4.2852	511	2.791731562	0.0064489	12.79373752	0.029553534
8.929753179	×ÔÉí³µÁ¾	Road 1	62.14514087	45.02917213	0.026673788	1.717769265	0.600000024	0	83.8392	981.8896	655.7934	0.1996	4.2811	512	2.539347525	0.005865893	12.83619099	0.029651601
8.946293293	×ÔÉí³µÁ¾	Road 1	62.35258894	45.15162849	0.025816757	1.727207541	0.600000024	0	84.1023	981.8887	655.7933	0.2024	4.2744	513	3.536140563	0.008168485	12.89467916	0.029786709
8.963074233	×ÔÉí³µÁ¾	Road 1	62.5634396	45.23360023	0.024884522	1.732797027	0.600000024	0	84.278	981.8877	655.7932	0.2046	4.2702	514	2.559597129	0.005912669	12.9376316	0.029885929
8.979682159	×ÔÉí³µÁ¾	Road 1	62.77249564	45.31581917	0.023891365	1.737782121	0.600000024	0	84.4541	981.8857	655.7932	0.2078	4.2641	515	2.589436343	0.005981598	12.98063677	0.029985271
8.996304014	×ÔÉí³µÁ¾	Road 1	62.98229792	45.43946342	0.023080498	1.741466403	0.600000024	0	84.7188	981.8838	655.793	0.2116	4.2564	516	3.570505121	0.008247867	13.03998519	0.030122366
9.012981586	×ÔÉí³µÁ¾	Road 1	63.19318606	45.52205315	0.022353511	1.744101405	0.600000024	0	84.8957	981.8828	655.793	0.2138	4.2522	517	2.600468516	0.006007082	13.08335469	0.030222549
9.029637898	×ÔÉí³µÁ¾	Road 1	63.40437913	45.64606476	0.021698883	1.745996714	0.600000024	0	85.1616	981.8809	655.7928	0.2176	4.2444	518	3.58800787	0.008288298	13.14311767	0.030360602
9.046426169	×ÔÉí³µÁ¾	Road 1	63.61763101	45.72875404	0.02123218	1.745957255	0.600000024	0	85.3393	981.8789	655.7928	0.2208	4.2393	519	2.600368937	0.006006852	13.18677337	0.030461446
9.062955286	×ÔÉí³µÁ¾	Road 1	63.82797077	45.81147079	0.020924794	1.747115016	0.600000024	0	85.5173	981.877	655.7927	0.224	4.2331	520	2.635735425	0.006088549	13.23033974	0.030562085
9.079611964	×ÔÉí³µÁ¾	Road 1	64.04050781	45.93553047	0.020710016	1.746186733	0.600000024	0	85.7849	981.875	655.7926	0.2279	4.2263	521	3.609961634	0.008339011	13.29046971	0.030700985
9.096304564	×ÔÉí³µÁ¾	Road 1	64.25388647	46.01818542	0.020592861	1.745965719	0.600000024	0	85.9637	981.873	655.7925	0.2312	4.2201	522	2.625339722	0.006064535	13.33429346	0.030802218
9.113054347	×ÔÉí³µÁ¾	Road 1	64.46838061	46.10083008	0.020496713	1.746341467	0.600000024	0	86.1429	981.8711	655.7925	0.2354	4.2149	523	2.622545732	0.006058081	13.37822053	0.030903689
9.129736684	×ÔÉí³µÁ¾	Road 1	64.68258537	46.22476616	0.020278072	1.745365143	0.600000024	0	86.4122	981.8682	655.7924	0.2403	4.2062	524	3.623306326	0.008369838	13.43866575	0.031043318
9.14656821	×ÔÉí³µÁ¾	Road 1	64.89909173	46.30732498	0.019959768	1.745185018	0.600000024	0	86.5921	981.8662	655.7922	0.2436	4.201	525	2.621338887	0.006055293	13.48278688	0.031145238
9.163035745	×ÔÉí³µÁ¾	Road 1	65.11132062	46.39577179	0.019498535	1.745073557	0.600000024	0	86.7852	981.8633	655.7921	0.2491	4.1935	526	2.812303909	0.006496422	13.52909859	0.031252218
9.179685458	×ÔÉí³µÁ¾	Road 1	65.32646995	46.51957397	0.018842774	1.744315982	0.600000024	0	87.0562	981.8604	655.792	0.255	4.1857	527	3.647146668	0.008424909	13.58982254	0.03139249
9.196379525	×ÔÉí³µÁ¾	Road 1	65.54256733	46.60042305	0.018208219	1.671902299	0.600000024	0	87.2373	981.8574	655.7919	0.2592	4.1785	528	2.611120389	0.006031688	13.63341276	0.031493183
9.212981586	×ÔÉí³µÁ¾	Road 1	65.75842569	46.80684586	0.017563315	4.216351509	0.600000024	0	87.5096	981.8535	655.7918	0.2662	4.1697	529	5.682384988	0.013126309	13.72775206	0.031711107
9.229725138	×ÔÉí³µÁ¾	Road 1	65.97710963	47.01882706	0.016873522	4.331829071	0.600000024	0	87.6921	981.8516	655.7917	0.2695	4.1634	530	5.798503515	0.013394543	13.82483961	0.031935379
9.246283579	×ÔÉí³µÁ¾	Road 1	66.19435478	47.23165283	0.016301889	4.324747086	0.600000024	0	87.8754	981.8486	655.7916	0.2748	4.1572	531	5.901811154	0.013633184	13.9225644	0.032161124
9.262959318	×ÔÉí³µÁ¾	Road 1	66.41468712	47.5658947	0.015737565	4.341031551	0.600000024	0	88.165	981.8447	655.7914	0.282	4.148	532	8.880197643	0.020513257	14.07064826	0.032503197
9.279674278	×ÔÉí³µÁ¾	Road 1	66.63660155	47.79502487	0.015119144	4.358021259	0.600000024	0	88.3637	981.8418	655.7914	0.2866	4.1405	533	6.320203344	0.01459967	14.17629021	0.03274723
9.296289535	×ÔÉí³µÁ¾	Road 1	66.85818074	48.00919304	0.014560768	4.355670929	0.600000024	0	88.55	981.8389	655.7913	0.2919	4.1342	534	6.009400987	0.013881716	14.27613795	0.032977879
9.31300193	×ÔÉí³µÁ¾	Road 1	67.08253616	48.32817421	0.01397909	4.279891014	0.600000024	0	88.831	981.834	655.7911	0.3	4.1242	535	8.621073592	0.01991468	14.42021673	0.033310701
9.329636615	×ÔÉí³µÁ¾	Road 1	67.30674434	48.52207603	0.013351187	3.435900688	0.607843161	0	89.0193	981.8311	655.791	0.3054	4.1169	536	5.555498398	0.012833201	14.51263069	0.033524177
9.346324083	×ÔÉí³µÁ¾	Road 1	67.53219342	48.63629608	0.012807416	1.434470534	0.607843161	0	89.2083	981.8281	655.7909	0.3107	4.1106	537	3.551808261	0.008204677	14.57190138	0.033661092
9.363000555	×ÔÉí³µÁ¾	Road 1	67.75778401	48.69891815	0.012293236	0.791678369	0.615686297	0	89.4922	981.8242	655.7908	0.3179	4.1015	538	2.258111623	0.005216238	14.60955872	0.033748081
9.379593453	×ÔÉí³µÁ¾	Road 1	67.9826429	48.78545265	0.011736177	2.356678486	0.623529434	0	89.6817	981.8203	655.7906	0.3242	4.0932	539	2.876214913	0.006644056	14.65728346	0.033858325
9.396313545	×ÔÉí³µÁ¾	Road 1	68.21002479	48.95755348	0.011232902	2.905634642	0.623529434	0	89.8717	981.8174	655.7905	0.3297	4.0868	540	5.028014931	0.011614714	14.74135233	0.034052524
9.413119045	×ÔÉí³µÁ¾	Road 1	68.43929086	49.11236458	0.010730856	2.299497604	0.631372571	0	90.1576	981.8125	655.7904	0.3388	4.0768	541	4.58562264	0.010592788	14.81841601	0.034230541
9.429759961	×ÔÉí³µÁ¾	Road 1	68.66673698	49.20438538	0.010183658	1.653179646	0.631372571	0	90.3487	981.8096	655.7903	0.3442	4.0694	542	3.031897042	0.007003682	14.86886956	0.034347089
9.446363855	×ÔÉí³µÁ¾	Road 1	68.89414843	49.30657883	0.009755361	1.458346605	0.631372571	0	90.6361	981.8047	655.7902	0.3523	4.0593	543	3.303371454	0.007630788	14.92371839	0.034473789
9.46293036	×ÔÉí³µÁ¾	Road 1	69.1214431	49.39248161	0.009371764	1.722481608	0.631372571	0	90.8554	981.8008	655.79	0.3593	4.0514	544	2.895589653	0.006688812	14.97168819	0.0345846
9.479668047	×ÔÉí³µÁ¾	Road 1	69.35150472	49.48245621	0.009018176	1.781443715	0.631372571	0	91.0613	981.7969	655.7899	0.3659	4.0438	545	2.981507675	0.006887283	15.02159173	0.034699877
9.496264976	×ÔÉí³µÁ¾	Road 1	69.58000591	49.56364174	0.008790062	1.651645541	0.631372571	0	91.2539	981.793	655.7898	0.3724	4.0354	546	2.778986913	0.00641946	15.06771438	0.03480642
9.512941815	×ÔÉí³µÁ¾	Road 1	69.81012632	49.67569199	0.008646569	1.430873632	0.631372571	0	91.5571	981.7881	655.7896	0.3818	4.025	547	3.567517086	0.008240964	15.12720928	0.034943853
9.529658608	×ÔÉí³µÁ¾	Road 1	70.0410992	49.74054222	0.008623448	1.375764251	0.631372571	0	91.7504	981.7842	655.7895	0.3882	4.0176	548	2.353346324	0.00543623	15.16654969	0.03503473
9.546362938	×ÔÉí³µÁ¾	Road 1	70.27221338	49.80810471	0.008635003	1.349047303	0.639215708	0	91.9578	981.7803	655.7894	0.3949	4.0099	549	2.427178761	0.005606783	15.20709408	0.035128387
9.563087429	×ÔÉí³µÁ¾	Road 1	70.50391341	49.8741703	0.008623448	1.318115711	0.639215708	0	92.1654	981.7764	655.7892	0.4016	4.0013	550	2.38937681	0.00551946	15.24705519	0.035220698
9.579618378	×ÔÉí³µÁ¾	Road 1	70.73334375	49.96381187	0.008527555	1.279970527	0.639215708	0	92.4566	981.7705	655.7891	0.4118	3.9901	551	3.027932021	0.006994523	15.29710979	0.035336324
9.596261494	×ÔÉí³µÁ¾	Road 1	70.96460223	50.02251663	0.008289062	1.271607518	0.639215708	0	92.6509	981.7676	655.7889	0.4183	3.9837	552	2.212984553	0.005111994	15.33394074	0.035421403
9.613083489	×ÔÉí³µÁ¾	Road 1	71.19875391	50.10975494	0.007897897	1.253754258	0.639215708	0	92.943	981.7617	655.7888	0.4285	3.9725	553	2.933556527	0.006776516	15.38328902	0.035535398
9.629641563	×ÔÉí³µÁ¾	Road 1	71.42949396	50.16671562	0.00735875	1.227839708	0.639215708	0	93.1379	981.7578	655.7887	0.4349	3.9651	554	2.180738439	0.005037506	15.41939785	0.035618809
9.646446696	×ÔÉí³µÁ¾	Road 1	71.66404647	50.24589958	0.006871154	1.205263257	0.639215708	0	93.4168	981.752	655.7885	0.4449	3.9532	555	2.735204679	0.006318323	15.46536332	0.035724989
9.663028963	×ÔÉí³µÁ¾	Road 1	71.89561442	50.27325897	0.006424551	1.195394516	0.639215708	0	93.5145	981.75	655.7885	0.4486	3.9494	556	1.407643234	0.003251656	15.48870524	0.035778909
9.679619661	×ÔÉí³µÁ¾	Road 1	72.12773311	50.36721611	0.005946501	1.201726437	0.639215708	0	93.8499	981.7432	655.7883	0.4606	3.9365	557	3.154497851	0.00728689	15.54104056	0.035899804
9.6962965	×ÔÉí³µÁ¾	Road 1	72.36131148	50.42215462	0.005527047	1.197650075	0.639215708	0	94.0459	981.7393	655.7881	0.4671	3.9291	558	2.126871616	0.004913073	15.57651006	0.035981738
9.712994232	×ÔÉí³µÁ¾	Road 1	72.59543501	50.47659874	0.005092485	1.184031129	0.631372571	0	94.242	981.7354	655.788	0.4746	3.9216	559	2.1141464	0.004883678	15.61181151	0.036063285
9.729603991	×ÔÉí³µÁ¾	Road 1	72.82871252	50.56057892	0.004620099	1.162049413	0.631372571	0	94.5507	981.7285	655.7878	0.486	3.9091	560	2.900631982	0.00670046	15.6599903	0.036174578
9.746393362	×ÔÉí³µÁ¾	Road 1	73.06475934	50.61348152	0.004230335	1.160471559	0.631372571	0	94.7474	981.7246	655.7877	0.4925	3.9017	561	2.07117058	0.004784404	15.69476396	0.036254905
9.762944472	×ÔÉí³µÁ¾	Road 1	73.29771721	50.67021904	0.003910662	1.162741661	0.631372571	0	94.9584	981.7207	655.7876	0.5003	3.893	562	2.194359185	0.00506897	15.73108304	0.036338802
9.779576224	×ÔÉí³µÁ¾	Road 1	73.53217691	50.74960899	0.003637746	1.1563375	0.623529434	0	95.2541	981.7148	655.7874	0.5105	3.8817	563	2.786583142	0.006437007	15.7774288	0.036445861
9.796480694	×ÔÉí³µÁ¾	Road 1	73.77072722	50.80201378	0.003463046	1.145417929	0.623529434	0	95.4515	981.71	655.7873	0.519	3.8733	564	2.055441125	0.004748069	15.81217494	0.036526124
9.812994782	×ÔÉí³µÁ¾	Road 1	74.0041246	50.87962189	0.003340869	1.133157611	0.623529434	0	95.7481	981.7041	655.7871	0.5292	3.862	565	2.760530729	0.006376826	15.85776259	0.036631432
9.82963973	×ÔÉí³µÁ¾	Road 1	74.23960949	50.93110657	0.0032216	1.133074403	0.623529434	0	95.946	981.7002	655.787	0.5357	3.8545	566	2.056861397	0.00475135	15.89199894	0.036710518
9.846271116	×ÔÉí³µÁ¾	Road 1	74.47515753	50.986306	0.003109102	1.133738995	0.623529434	0	96.1583	981.6953	655.7869	0.5444	3.8458	567	2.158190644	0.00498542	15.92789264	0.036793432
9.863009903	×ÔÉí³µÁ¾	Road 1	74.71248305	51.04144707	0.002997351	1.130161881	0.623529434	0	96.3708	981.6914	655.7867	0.5522	3.838	568	2.149276351	0.004964828	15.96386892	0.036876537
9.879616729	×ÔÉí³µÁ¾	Road 1	74.94829138	51.11813507	0.002855016	1.121478319	0.623529434	0	96.6687	981.6846	655.7866	0.5634	3.8258	569	2.736048903	0.006320273	16.00930601	0.036981497
9.896299066	×ÔÉí³µÁ¾	Road 1	75.18540739	51.16894684	0.002711915	1.118020415	0.615686297	0	96.8676	981.6807	655.7864	0.5709	3.8173	570	2.044185789	0.004722069	16.0434078	0.037060272
9.912944014	×ÔÉí³µÁ¾	Road 1	75.42224318	51.2232811	0.002554811	1.1171453	0.615686297	0	97.0808	981.6758	655.7863	0.5786	3.8085	571	2.142649781	0.004949521	16.0790721	0.037142657
9.929730819	×ÔÉí³µÁ¾	Road 1	75.66145136	51.29918633	0.002363054	1.112803102	0.607843161	0	97.3798	981.6699	655.7861	0.5899	3.7972	572	2.702107852	0.006241869	16.12443185	0.037247438
9.946277897	×ÔÉí³µÁ¾	Road 1	75.89747451	51.34944878	0.002174987	1.10503602	0.600000024	0	97.5794	981.665	655.786	0.5984	3.7887	573	2.04666677	0.0047278	16.15829821	0.037325669
9.96301815	×ÔÉí³µÁ¾	Road 1	76.13659976	51.42400818	0.002002986	1.090976715	0.600000024	0	97.8791	981.6592	655.7858	0.6087	3.7774	574	2.67786481	0.006185868	16.20312634	0.037429222
9.979569626	×ÔÉí³µÁ¾	Road 1	76.37327081	51.47672539	0.001817027	1.085089326	0.592156887	0	98.0934	981.6543	655.7856	0.6174	3.7686	575	2.11655032	0.004889231	16.23815838	0.037510146
9.99632894	×ÔÉí³µÁ¾	Road 1	76.61314156	51.52565918	0.001653168	1.079698324	0.58431375	0	98.2936	981.6494	655.7855	0.6259	3.7601	576	2.000275062	0.004620635	16.27168161	0.037587585
10.01299991	×ÔÉí³µÁ¾	Road 1	76.85208499	51.59844704	0.00149348	1.068327665	0.58431375	0	98.5944	981.6436	655.7854	0.6372	3.7488	577	2.64686585	0.00611426	16.31580744	0.037689515
10.02962983	×ÔÉí³µÁ¾	Road 1	77.09066149	51.64639549	0.001323343	1.058618069	0.58431375	0	98.7951	981.6387	655.7852	0.6447	3.7403	578	1.987975239	0.004592223	16.34886731	0.037765883
10.04630997	×ÔÉí³µÁ¾	Road 1	77.33017859	51.69391136	0.001182954	1.051111817	0.58431375	0	98.996	981.6348	655.7851	0.6523	3.7327	579	1.974077549	0.004560119	16.3817952	0.037841947
10.06296775	×ÔÉí³µÁ¾	Road 1	77.56970212	51.76469078	0.001059509	1.045075774	0.58431375	0	99.2977	981.6279	655.7849	0.6645	3.7203	580	2.602115422	0.006010887	16.42514066	0.037942075
10.07963139	×ÔÉí³µÁ¾	Road 1	77.80952751	51.8116848	0.000937052	1.042877793	0.58431375	0	99.499	981.624	655.7848	0.6721	3.7127	581	1.965145481	0.004539486	16.45788714	0.038017719
10.09726421	×ÔÉí³µÁ¾	Road 1	78.06364512	51.8818634	0.000839804	1.037736297	0.58431375	0	99.8014	981.6172	655.7846	0.6844	3.7004	582	2.486798404	0.005744504	16.5017364	0.038119011
10.11290039	×ÔÉí³µÁ¾	Road 1	78.28919012	51.92839394	0.000749528	1.033218265	0.58431375	0	100.0032	981.6123	655.7845	0.6919	3.6918	583	2.038731465	0.00470947	16.53361438	0.038192649
10.12964761	×ÔÉí³µÁ¾	Road 1	78.53097694	51.97475624	0.000656929	1.030444026	0.58431375	0	100.2052	981.6084	655.7844	0.6995	3.6842	584	1.947142127	0.004497898	16.5662236	0.038267977
10.14644431	×ÔÉí³µÁ¾	Road 1	78.77380172	52.04409714	0.000581809	1.027876616	0.58431375	0	100.5085	981.6016	655.7842	0.7118	3.6722	585	2.560285511	0.00591426	16.60922795	0.038367317
10.1629738	×ÔÉí³µÁ¾	Road 1	79.01297524	52.09023628	0.000513231	1.02669847	0.58431375	0	100.711	981.5967	655.7841	0.7203	3.6638	586	1.961139336	0.004530232	16.64164457	0.038442199
10.17972248	×ÔÉí³µÁ¾	Road 1	79.2555348	52.1362999	0.000448119	1.02573204	0.576470613	0	100.9136	981.5928	655.7839	0.7279	3.6562	587	1.944126183	0.004490931	16.67420612	0.038517416
10.19629852	×ÔÉí³µÁ¾	Road 1	79.49580546	52.18222275	0.000400582	1.021571517	0.576470613	0	101.1164	981.5879	655.7838	0.7364	3.6477	588	1.954660981	0.004515267	16.70660665	0.038592261
10.2129497	×ÔÉí³µÁ¾	Road 1	79.73742192	52.23769684	0.000358838	1.015465021	0.576470613	0	101.3629	981.583	655.7836	0.7457	3.6373	589	2.209475189	0.005103888	16.74339702	0.038677247
10.23047218	×ÔÉí³µÁ¾	Road 1	79.99201298	52.30581551	0.000320958	1.011128187	0.576470613	0	101.6677	981.5762	655.7834	0.7581	3.625	590	2.462928472	0.005689365	16.78655365	0.038776939
10.24634406	×ÔÉí³µÁ¾	Road 1	80.22282139	52.35108948	0.000291038	1.009778976	0.576470613	0	101.8712	981.5723	655.7833	0.7647	3.6174	591	1.997119862	0.004613347	16.8182517	0.038850161
10.26298204	×ÔÉí³µÁ¾	Road 1	80.46508359	52.41884766	0.000264167	1.006687045	0.568627477	0	102.1767	981.5654	655.7831	0.777	3.605	592	2.551361751	0.005893646	16.86070121	0.03894822
10.27962443	×ÔÉí³µÁ¾	Road 1	80.70761779	52.4638298	0.000244689	1.002564073	0.568627477	0	102.3806	981.5605	655.783	0.7856	3.5964	593	1.932982595	0.00446519	16.89287065	0.039022531
10.29629283	×ÔÉí³µÁ¾	Road 1	80.95084181	52.53090134	0.000225853	0.996672988	0.568627477	0	102.6868	981.5537	655.7828	0.798	3.584	594	2.534127526	0.005853835	16.93511052	0.039120105
10.31291029	×ÔÉí³µÁ¾	Road 1	81.1935277	52.57538567	0.000208009	0.994172096	0.568627477	0	102.8911	981.5498	655.7827	0.8056	3.5764	595	1.924697485	0.004446051	16.96709409	0.039193987
10.32956807	×ÔÉí³µÁ¾	Road 1	81.4370224	52.62292213	0.000188109	0.991590798	0.568627477	0	103.1102	981.5449	655.7825	0.8145	3.5675	596	2.006473542	0.004634954	17.00051748	0.039271195
10.34630026	×ÔÉí³µÁ¾	Road 1	81.68191304	52.68923836	0.000170927	0.987909973	0.568627477	0	103.4173	981.5381	655.7823	0.8269	3.5551	597	2.513356826	0.005805854	17.04257144	0.03936834
10.36297966	×ÔÉí³µÁ¾	Road 1	81.92623549	52.73334846	0.000153245	0.987021506	0.568627477	0	103.6223	981.5332	655.7822	0.8355	3.5465	598	1.91483539	0.00442327	17.07450976	0.039442118
10.37958869	×ÔÉí³µÁ¾	Road 1	82.16973019	52.77738304	0.000133213	0.985319078	0.568627477	0	103.8274	981.5293	655.7821	0.8432	3.5389	599	1.919220824	0.0044334	17.10638615	0.039515752
10.39637329	×ÔÉí³µÁ¾	Road 1	82.41610606	52.84324951	0.000116312	0.982696354	0.568627477	0	104.1354	981.5225	655.7819	0.8558	3.5264	600	2.501959507	0.005779526	17.14838055	0.039612759
10.41291781	×ÔÉí³µÁ¾	Road 1	82.65917362	52.8902401	0.0001015	0.982426405	0.568627477	0	104.3556	981.5176	655.7818	0.865	3.5176	601	2.009003349	0.004640798	17.18161853	0.039689539
10.42965623	×ÔÉí³µÁ¾	Road 1	82.90529364	52.93403435	8.60E-05	0.980395794	0.568627477	0	104.5613	981.5127	655.7816	0.8737	3.5089	602	1.908094161	0.004407698	17.21355701	0.039763317
10.44623043	×ÔÉí³µÁ¾	Road 1	83.14930101	52.99962273	7.43E-05	0.979647338	0.568627477	0	104.8702	981.5059	655.7814	0.8861	3.4965	603	2.523606249	0.00582953	17.25538377	0.039859937
10.46293879	×ÔÉí³µÁ¾	Road 1	83.39550066	53.04641762	6.44E-05	0.978494942	0.568627477	0	105.0911	981.501	655.7813	0.8949	3.4876	604	1.995924158	0.004610585	17.2887324	0.039936972
10.47957054	×ÔÉí³µÁ¾	Road 1	83.64078741	53.09316101	5.49E-05	0.977116406	0.568627477	0	105.3122	981.4961	655.7811	0.9038	3.4787	605	2.001916222	0.004624426	17.32202777	0.040013884
10.49627451	×ÔÉí³µÁ¾	Road 1	83.88744244	53.15852623	4.69E-05	0.976768136	0.568627477	0	105.622	981.4893	655.781	0.9162	3.4662	606	2.510033063	0.005798176	17.36395527	0.040110737
10.51296564	×ÔÉí³µÁ¾	Road 1	84.13410983	53.20205269	4.00E-05	0.976224184	0.568627477	0	105.8288	981.4854	655.7809	0.9239	3.4586	607	1.912274876	0.004417355	17.39587331	0.040184467
10.5295908	×ÔÉí³µÁ¾	Road 1	84.38000303	53.24555168	3.31E-05	0.97569406	0.56078434	0	106.0358	981.4805	655.7807	0.9325	3.4499	608	1.917594225	0.004429643	17.42775361	0.040258111
10.54631895	×ÔÉí³µÁ¾	Road 1	84.62772234	53.31068687	2.70E-05	0.971896648	0.56078434	0	106.3465	981.4736	655.7805	0.945	3.4374	609	2.507429119	0.005792161	17.46969828	0.040355003
10.56297306	×ÔÉí³µÁ¾	Road 1	84.87455927	53.35697021	2.10E-05	0.96793586	0.56078434	0	106.5687	981.4688	655.7804	0.9539	3.4285	610	1.995909771	0.004610552	17.50293838	0.040431788
10.57962571	×ÔÉí³µÁ¾	Road 1	85.12157359	53.40001602	1.49E-05	0.965601504	0.56078434	0	106.7762	981.4648	655.7803	0.9615	3.4209	611	1.907747101	0.004406896	17.53470742	0.040505174
10.59629448	×ÔÉí³µÁ¾	Road 1	85.36912526	53.46439934	1.03E-05	0.963190973	0.56078434	0	107.0878	981.458	655.78	0.974	3.4084	612	2.499386369	0.005773583	17.57636913	0.040601413
10.61291047	×ÔÉí³µÁ¾	Road 1	85.61610495	53.51031532	6.69E-06	0.96288079	0.56078434	0	107.3106	981.4531	655.7799	0.9829	3.3994	613	1.993517597	0.004605026	17.6094934	0.04067793
10.62961444	×ÔÉí³µÁ¾	Road 1	85.86460502	53.55616608	3.67E-06	0.961310506	0.56078434	0	107.5336	981.4482	655.7798	0.9918	3.3905	614	1.986430337	0.004588654	17.64267466	0.040754578
10.64639868	×ÔÉí³µÁ¾	Road 1	86.11459789	53.62020264	1.84E-06	0.958711922	0.56078434	0	107.8462	981.4414	655.7795	1.0043	3.378	615	2.483931448	0.005737882	17.68436556	0.040850884
10.66294832	×ÔÉí³µÁ¾	Road 1	86.36129253	53.66282959	7.26E-07	0.958181858	0.56078434	0	108.0547	981.4365	655.7794	1.0129	3.3693	616	1.911392365	0.004415316	17.71599842	0.040923956
10.67958191	×ÔÉí³µÁ¾	Road 1	86.60943518	53.70541191	1.36E-07	0.957241654	0.56078434	0	108.2635	981.4316	655.7793	1.0216	3.3606	617	1.90539667	0.004401466	17.747692	0.040997169
10.69627707	×ÔÉí³µÁ¾	Road 1	86.8587923	53.76919441	3.24E-09	0.956061482	0.56078434	0	108.5769	981.4248	655.7791	1.0341	3.3481	618	2.492393028	0.005757428	17.78930291	0.04109329
10.71292642	×ÔÉí³µÁ¾	Road 1	87.1076756	53.81471558	-1.43E-08	0.955711365	0.56078434	0	108.8009	981.4199	655.7789	1.043	3.3392	619	1.989561694	0.004595888	17.82242782	0.041169808
10.72963771	×ÔÉí³µÁ¾	Road 1	87.35768196	53.85716057	-3.35E-07	0.954778612	0.56078434	0	109.0103	981.415	655.7788	1.0517	3.3305	620	1.900573856	0.004390326	17.85418887	0.041243176
10.74628743	×ÔÉí³µÁ¾	Road 1	87.60706117	53.92075768	-1.40E-06	0.954408705	0.56078434	0	109.3246	981.4082	655.7787	1.0642	3.3179	621	2.498250401	0.005770958	17.89578402	0.041339261
10.76294924	×ÔÉí³µÁ¾	Road 1	87.85683163	53.96614494	-3.83E-06	0.953900933	0.56078434	0	109.5493	981.4033	655.7785	1.0731	3.309	622	1.989619423	0.004596021	17.92893468	0.041415839
10.77961031	×ÔÉí³µÁ¾	Road 1	88.10678707	54.00849037	-9.12E-06	0.952938378	0.56078434	0	109.7592	981.3994	655.7784	1.0808	3.3012	623	1.905857282	0.00440253	17.96068831	0.04148919
10.79625819	×ÔÉí³µÁ¾	Road 1	88.35683794	54.07193642	-1.77E-05	0.952118158	0.56078434	0	110.0743	981.3926	655.7782	1.0933	3.2887	624	2.500377842	0.005775873	18.00231431	0.041585346
10.81291561	×ÔÉí³µÁ¾	Road 1	88.60722763	54.11422348	-2.69E-05	0.952220678	0.56078434	0	110.2847	981.3877	655.7781	1.102	3.28	625	1.907626149	0.004406616	18.03409042	0.041658749
10.82958181	×ÔÉí³µÁ¾	Road 1	88.85804288	54.17758369	-4.12E-05	0.951270461	0.56078434	0	110.6004	981.3809	655.7779	1.1145	3.2674	626	2.500309546	0.005775715	18.0757611	0.041755008
10.84624326	×ÔÉí³µÁ¾	Road 1	89.10898181	54.21980209	-5.61E-05	0.951077938	0.56078434	0	110.8112	981.376	655.7777	1.1232	3.2587	627	1.908546297	0.004408742	18.10756023	0.041828464
10.86291606	×ÔÉí³µÁ¾	Road 1	89.36028741	54.26202049	-7.21E-05	0.950547874	0.56078434	0	111.0221	981.3711	655.7776	1.1319	3.25	628	1.908989645	0.004409766	18.13938845	0.041901987
10.87955698	×ÔÉí³µÁ¾	Road 1	89.61140474	54.32527771	-9.17E-05	0.949730217	0.56078434	0	111.3387	981.3643	655.7774	1.1445	3.2374	629	2.506119434	0.005789136	18.18109257	0.041998324
10.89624628	×ÔÉí³µÁ¾	Road 1	89.86344758	54.36741714	-0.000110943	0.94960767	0.56078434	0	111.55	981.3604	655.7773	1.1522	3.2297	630	1.908719075	0.004409141	18.21294776	0.042071909
10.91295538	×ÔÉí³µÁ¾	Road 1	90.115985	54.40957031	-0.000131075	0.948889911	0.56078434	0	111.7615	981.3555	655.7771	1.1609	3.2209	631	1.908946996	0.004409668	18.24484454	0.042145591
10.92962049	×ÔÉí³µÁ¾	Road 1	90.36815006	54.47274513	-0.000154824	0.949097514	0.56078434	0	112.079	981.3486	655.7769	1.1735	3.2083	632	2.507189715	0.005791608	18.28662713	0.042242109
10.94628559	×ÔÉí³µÁ¾	Road 1	90.62051004	54.51485023	-0.000177784	0.948571086	0.56078434	0	112.2909	981.3438	655.7768	1.1822	3.1996	633	1.913839205	0.004420969	18.31852147	0.042315785
10.96292285	×ÔÉí³µÁ¾	Road 1	90.87264254	54.55691071	-0.00020039	0.948029399	0.56078434	0	112.5029	981.3389	655.7767	1.1909	3.1909	634	1.915814722	0.004425532	18.35039536	0.042389413
10.97955057	×ÔÉí³µÁ¾	Road 1	91.12483878	54.60198212	-0.000225513	0.947887778	0.56078434	0	112.7303	981.334	655.7765	1.1999	3.1819	635	2.003211128	0.004627418	18.38370419	0.042466357
10.996256	×ÔÉí³µÁ¾	Road 1	91.37853414	54.67104492	-0.000246124	0.947268903	0.56078434	0	113.0793	981.3262	655.7763	1.214	3.1677	636	2.677231563	0.006184405	18.42842849	0.04256967
11.01288628	×ÔÉí³µÁ¾	Road 1	91.63128242	54.71305733	-0.000266814	0.946917176	0.56078434	0	113.2919	981.3213	655.7762	1.2227	3.159	637	1.919575517	0.004434219	18.46035158	0.042643412
11.02953233	×ÔÉí³µÁ¾	Road 1	91.88446443	54.75505257	-0.000291843	0.945986927	0.552941203	0	113.5047	981.3174	655.7761	1.2305	3.1512	638	1.919199901	0.004433352	18.49229868	0.04271721
11.04626928	×ÔÉí³µÁ¾	Road 1	92.13934902	54.82386818	-0.000317111	0.942776561	0.552941203	0	113.8547	981.3096	655.7758	1.2446	3.137	639	2.673204594	0.006175103	18.53703998	0.042820562
11.06288747	×ÔÉí³µÁ¾	Road 1	92.39253512	54.84772911	-0.000343348	0.941060007	0.552941203	0	113.9765	981.3066	655.7758	1.2498	3.1319	640	1.407019411	0.003250215	18.5604221	0.042874575
11.07952656	×ÔÉí³µÁ¾	Road 1	92.64638269	54.92196922	-0.000374788	0.937879622	0.552941203	0	114.3576	981.2988	655.7755	1.2645	3.1172	641	2.843458631	0.006568389	18.60773464	0.042983867
11.09625801	×ÔÉí³µÁ¾	Road 1	92.90183221	54.96343575	-0.000402575	0.935677469	0.552941203	0	114.5712	981.2939	655.7754	1.2733	3.1084	642	1.904250766	0.004398819	18.63959553	0.043057466
11.11292532	×ÔÉí³µÁ¾	Road 1	93.15658986	55.02553596	-0.000429093	0.934519351	0.552941203	0	114.8919	981.2871	655.7751	1.2859	3.0957	643	2.498736947	0.005772082	18.68124275	0.043153671
11.12953911	×ÔÉí³µÁ¾	Road 1	93.4107203	55.06687546	-0.000461656	0.9327389	0.552941203	0	115.106	981.2822	655.775	1.2947	3.087	644	1.911984742	0.004416685	18.71300806	0.043227049
11.14667598	×ÔÉí³µÁ¾	Road 1	93.67304826	55.10812912	-0.000493535	0.931598544	0.552941203	0	115.3201	981.2773	655.7749	1.3035	3.0782	645	1.87465197	0.004330446	18.74513372	0.043301259
11.16291918	×ÔÉí³µÁ¾	Road 1	93.92198832	55.17287636	-0.000525655	0.930170953	0.552941203	0	115.657	981.2695	655.7747	1.3174	3.0643	646	2.628596258	0.006072057	18.78783054	0.043399889
11.17960921	×ÔÉí³µÁ¾	Road 1	94.17796713	55.21400986	-0.000562876	0.929489076	0.552941203	0	115.8716	981.2656	655.7745	1.3252	3.0565	647	1.9049864	0.004400519	18.81962483	0.043473333
11.19619881	×ÔÉí³µÁ¾	Road 1	94.43259497	55.25511932	-0.000597257	0.929359853	0.552941203	0	116.0864	981.2607	655.7744	1.334	3.0477	648	1.912612733	0.004418135	18.85135431	0.043546628
11.21288885	×ÔÉí³µÁ¾	Road 1	94.68902285	55.31087151	-0.000634361	0.928791702	0.552941203	0	116.3013	981.2559	655.7743	1.3428	3.0389	649	2.326108693	0.005373311	18.89017714	0.043636309
11.22959501	×ÔÉí³µÁ¾	Road 1	94.94592961	55.36066704	-0.000680735	0.927191257	0.552941203	0	116.6394	981.249	655.774	1.3557	3.0259	650	2.155969444	0.004980289	18.92619512	0.043719511
11.24627588	×ÔÉí³µÁ¾	Road 1	95.20263738	55.40166321	-0.000724135	0.927481949	0.552941203	0	116.8547	981.2441	655.7739	1.3645	3.0171	651	1.90715194	0.004405521	18.95800808	0.043792999
11.26286805	×ÔÉí³µÁ¾	Road 1	95.45818235	55.44556389	-0.000767038	0.925929964	0.552941203	0	117.0856	981.2393	655.7738	1.3736	3.008	652	1.998533475	0.004616612	18.99116807	0.043869598
11.27956028	×ÔÉí³µÁ¾	Road 1	95.71547182	55.48940277	-0.000818793	0.925960064	0.552941203	0	117.3166	981.2334	655.7737	1.3837	2.998	653	1.990499492	0.004598054	19.02439395	0.04394635
11.2963097	×ÔÉí³µÁ¾	Road 1	95.973969	55.55953674	-0.000866153	0.925341725	0.552941203	0	117.6867	981.2256	655.7734	1.3982	2.9834	654	2.741343704	0.006332504	19.07030986	0.044052416
11.31295868	×ÔÉí³µÁ¾	Road 1	96.23111855	55.60330696	-0.000918762	0.92421335	0.552941203	0	117.9183	981.2207	655.7733	1.4073	2.9744	655	1.995267748	0.004609068	19.10352904	0.044129152
11.32960216	×ÔÉí³µÁ¾	Road 1	96.48837202	55.6441555	-0.000980671	0.924889922	0.552941203	0	118.1345	981.2158	655.7731	1.4161	2.9656	656	1.912580022	0.00441806	19.13536103	0.044202684
11.3462702	×ÔÉí³µÁ¾	Road 1	96.74628873	55.70541458	-0.001044357	0.923229754	0.552941203	0	118.4592	981.209	655.7729	1.4288	2.9528	657	2.501570522	0.005778628	19.17705731	0.044299002
11.36295107	×ÔÉí³µÁ¾	Road 1	97.00460646	55.74911957	-0.001112708	0.924144626	0.552941203	0	118.6914	981.2041	655.7728	1.4379	2.9437	658	1.995411579	0.004609401	19.21034251	0.044375891
11.37960555	×ÔÉí³µÁ¾	Road 1	97.26270423	55.78991661	-0.001205626	0.923204064	0.552941203	0	118.9082	981.1992	655.7727	1.4467	2.9349	659	1.914534556	0.004422575	19.24222809	0.044449547
11.39628202	×ÔÉí³µÁ¾	Road 1	97.52143948	55.85395317	-0.001303578	0.922981739	0.552941203	0	119.2493	981.1924	655.7725	1.4598	2.9219	660	2.586849276	0.005975622	19.2853676	0.044549199
11.41291194	×ÔÉí³µÁ¾	Road 1	97.77964065	55.89469185	-0.001410148	0.922216594	0.552941203	0	119.4665	981.1875	655.7723	1.4686	2.913	661	1.917620276	0.004429703	19.31725748	0.044622865
11.42962983	×ÔÉí³µÁ¾	Road 1	98.03941035	55.93832474	-0.00154551	0.921894848	0.552941203	0	119.6995	981.1826	655.7722	1.4777	2.9039	662	1.996280308	0.004611408	19.35063108	0.044699958
11.4462297	×ÔÉí³µÁ¾	Road 1	98.29762751	55.99936752	-0.001686673	0.921028435	0.552941203	0	120.0259	981.1748	655.772	1.4915	2.8902	663	2.514195515	0.005807792	19.39236637	0.044796366
11.46288857	×ÔÉí³µÁ¾	Road 1	98.55695092	56.04004784	-0.001844429	0.921319425	0.552941203	0	120.2437	981.1709	655.7719	1.4993	2.8824	664	1.918071015	0.004430744	19.42431928	0.044870178
11.4818014	×ÔÉí³µÁ¾	Road 1	98.85155928	56.07780647	-0.002045472	0.921172917	0.552941203	0	120.4461	981.166	655.7717	1.5088	2.8738	665	1.703363554	0.00393477	19.45653471	0.044944595
11.49745665	×ÔÉí³µÁ¾	Road 1	99.09572659	56.14745979	-0.002248024	0.920112252	0.552941203	0	120.8201	981.1582	655.7715	1.5235	2.8592	666	2.894226192	0.006685663	19.50184454	0.045049261
11.51285934	×ÔÉí³µÁ¾	Road 1	99.33605418	56.17066498	-0.002502136	0.920012236	0.552941203	0	120.9449	981.1553	655.7714	1.5286	2.8541	667	1.468057969	0.003391214	19.52445658	0.045101495
11.52952408	×ÔÉí³µÁ¾	Road 1	99.59639577	56.2402771	-0.00275667	0.919314742	0.552941203	0	121.3195	981.1475	655.7712	1.5433	2.8405	668	2.76640492	0.006390395	19.570558	0.045207989
11.54619176	×ÔÉí³µÁ¾	Road 1	99.85697102	56.28085098	-0.003035578	0.919981718	0.552941203	0	121.5382	981.1426	655.7711	1.5521	2.8316	669	1.921295541	0.004438193	19.60258153	0.045281963
11.56288546	×ÔÉí³µÁ¾	Road 1	100.1181413	56.32142143	-0.003359317	0.918577015	0.552941203	0	121.7571	981.1387	655.7709	1.56	2.8238	670	1.920518048	0.004436397	19.63464208	0.045356023
11.57957512	×ÔÉí³µÁ¾	Road 1	100.3795304	56.38223076	-0.003798132	0.917975068	0.552941203	0	122.0858	981.1318	655.7707	1.5728	2.811	671	2.512895687	0.005804789	19.67658148	0.045452903
11.59620394	×ÔÉí³µÁ¾	Road 1	100.6401536	56.42275314	-0.004227941	0.918505132	0.552941203	0	122.3051	981.127	655.7706	1.5817	2.8021	672	1.926647906	0.004450557	19.70861936	0.045526911
11.6129497	×ÔÉí³µÁ¾	Road 1	100.9028115	56.46615257	-0.004704416	0.918291211	0.552941203	0	122.5402	981.1221	655.7704	1.5908	2.793	673	2.00337504	0.004627796	19.74216738	0.045604407
11.62958181	×ÔÉí³µÁ¾	Road 1	101.1639675	56.5268795	-0.005304016	0.917357862	0.552941203	0	122.8697	981.1152	655.7703	1.6036	2.7802	674	2.522313131	0.005826543	19.78411879	0.045701314
11.6629124	×ÔÉí³µÁ¾	Road 1	101.6880705	56.60779724	-0.00587169	0.916702628	0.552941203	0	123.3096	981.1064	655.77	1.6214	2.7635	675	1.92708846	0.004451574	19.84834977	0.045849688
11.67953169	×ÔÉí³µÁ¾	Road 1	101.9496919	56.67130165	-0.00647849	0.916779935	0.552941203	0	123.6557	981.0996	655.7698	1.6345	2.7504	676	2.611132664	0.006031716	19.89174494	0.045949931
11.69630896	×ÔÉí³µÁ¾	Road 1	102.2139885	56.71171074	-0.008044027	0.916052818	0.552941203	0	123.8761	981.0947	655.7697	1.6434	2.7415	677	1.921109117	0.004437762	19.92397592	0.046024384
11.71284908	×ÔÉí³µÁ¾	Road 1	102.4747477	56.75492821	-0.008923311	0.914538205	0.552941203	0	124.1125	981.0898	655.7695	1.6526	2.7324	678	2.022494861	0.004671963	19.95742821	0.046101659
11.72958566	×ÔÉí³µÁ¾	Road 1	102.7388856	56.81544571	-0.010042369	0.915072799	0.552941203	0	124.4437	981.083	655.7693	1.6664	2.7196	679	2.516341377	0.005812749	19.99954318	0.046198945
11.76297783	×ÔÉí³µÁ¾	Road 1	103.2664436	56.87587738	-0.011109373	0.913623571	0.552941203	0	124.7752	981.0771	655.7691	1.6783	2.7077	680	1.631426489	0.003768595	20.05402004	0.046324786
11.77957403	×ÔÉí³µÁ¾	Road 1	103.529029	56.95928078	-0.012244535	0.91265732	0.552941203	0	125.2336	981.0684	655.7688	1.6964	2.6906	681	3.214937797	0.007426506	20.10737578	0.046448038
11.79641545	×ÔÉí³µÁ¾	Road 1	103.7956823	56.99946327	-0.01485203	0.911811471	0.56078434	0	125.4552	981.0645	655.7687	1.7043	2.6827	682	1.918196453	0.004431034	20.13968094	0.046522663
11.81288591	×ÔÉí³µÁ¾	Road 1	104.0567383	57.05978165	-0.016207891	0.914041698	0.56078434	0	125.7878	981.0586	655.7686	1.7172	2.6709	683	2.548715245	0.005887532	20.18165947	0.046619633
11.8295294	×ÔÉí³µÁ¾	Road 1	104.3207228	57.10009117	-0.017843163	0.91524297	0.56078434	0	126.0098	981.0547	655.7684	1.7251	2.6639	684	1.93881491	0.004478662	20.2139281	0.046694174
11.84619451	×ÔÉí³µÁ¾	Road 1	104.5853043	57.15494385	-0.019366184	0.917516232	0.56078434	0	126.3112	981.0488	655.7682	1.7374	2.6526	685	2.369518536	0.005473588	20.25341639	0.046785392
11.8629025	×ÔÉí³µÁ¾	Road 1	104.8507544	57.195401	-0.0209387	0.91673851	0.56078434	0	126.5336	981.0459	655.7681	1.7453	2.6457	686	1.941294612	0.004484391	20.28585153	0.046860317
11.87956981	×ÔÉí³µÁ¾	Road 1	105.1157585	57.2386837	-0.022704054	0.915994227	0.56078434	0	126.7719	981.042	655.768	1.7536	2.6374	687	2.029255628	0.004687581	20.31967376	0.046938446
11.89626461	×ÔÉí³µÁ¾	Road 1	105.3814005	57.2819664	-0.024234755	0.916142762	0.56078434	0	127.0105	981.0381	655.7679	1.7628	2.6292	688	2.028447522	0.004685714	20.35353828	0.047016673
11.91291579	×ÔÉí³µÁ¾	Road 1	105.6466286	57.34255943	-0.025784781	0.915976286	0.56078434	0	127.3448	981.0332	655.7677	1.7747	2.6183	689	2.548344075	0.005886675	20.39597122	0.047114694
11.92955267	×ÔÉí³µÁ¾	Road 1	105.9118289	57.38581467	-0.027658289	0.91487062	0.56078434	0	127.5838	981.0293	655.7676	1.7839	2.611	690	2.03523802	0.0047014	20.42983124	0.04719291
11.94619542	×ÔÉí³µÁ¾	Road 1	106.1773093	57.42618256	-0.029419286	0.914779186	0.56078434	0	127.807	981.0264	655.7675	1.7919	2.6041	691	1.94996849	0.004504427	20.46228407	0.047267876
11.96291625	×ÔÉí³µÁ¾	Road 1	106.4443159	57.48660393	-0.031280749	0.912311435	0.56078434	0	128.1422	981.0215	655.7673	1.8038	2.5931	692	2.54137338	0.005870573	20.50477793	0.047366037
11.97957329	×ÔÉí³µÁ¾	Road 1	106.7104899	57.52680702	-0.033389714	0.910758674	0.56078434	0	128.3658	981.0195	655.7672	1.8108	2.5881	693	1.946910812	0.004497364	20.53720771	0.04744095
11.99623327	×ÔÉí³µÁ¾	Road 1	106.9768967	57.56697922	-0.035206452	0.90973419	0.56078434	0	128.5896	981.0166	655.7671	1.8197	2.5811	694	1.946927852	0.004497403	20.56964349	0.047515876
12.01289251	×ÔÉí³µÁ¾	Road 1	107.2435834	57.62999268	-0.036986198	0.907907963	0.56078434	0	128.9416	981.0127	655.7669	1.831	2.5709	695	2.63102429	0.006077666	20.61347436	0.047617126
12.04628578	×ÔÉí³µÁ¾	Road 1	107.7788967	57.71007614	-0.039003663	0.905350447	0.56078434	0	129.3901	981.0088	655.7667	1.846	2.5598	696	1.944074363	0.004490812	20.67839335	0.047767089
12.06286145	×ÔÉí³µÁ¾	Road 1	108.0449034	57.77287674	-0.04075614	0.903470218	0.56078434	0	129.743	981.0059	655.7666	1.8582	2.5515	697	2.63991832	0.006098211	20.72215176	0.047868171
12.07952142	×ÔÉí³µÁ¾	Road 1	108.3124473	57.81267471	-0.04465859	0.900213003	0.56078434	0	129.9678	981.0039	655.7665	1.8652	2.5454	698	1.942743948	0.004487739	20.75451783	0.047942936
12.09625874	×ÔÉí³µÁ¾	Road 1	108.5815096	57.87213135	-0.046456944	0.896011293	0.56078434	0	130.1927	981.0029	655.7664	1.8732	2.5413	699	2.525833535	0.005834675	20.79679352	0.048040593
12.11290369	×ÔÉí³µÁ¾	Road 1	108.8492699	57.911689	-0.048205864	0.895280242	0.56078434	0	130.5303	981.001	655.7663	1.8832	2.5332	700	1.939416188	0.004480051	20.829075	0.048115163
12.12953251	×ÔÉí³µÁ¾	Road 1	109.116953	57.95115051	-0.050010558	0.892477632	0.56078434	0	130.7556	981	655.7662	1.8902	2.5291	701	1.938794382	0.004478615	20.86131486	0.048189637
12.14673133	×ÔÉí³µÁ¾	Road 1	109.3941074	58.01305161	-0.051466051	0.891176939	0.56078434	0	131.11	980.999	655.7661	1.9006	2.5217	702	2.554673686	0.005901296	20.90525222	0.048291133
12.16297453	×ÔÉí³µÁ¾	Road 1	109.6560398	58.05238953	-0.052768983	0.88835603	0.56078434	0	131.3357	980.999	655.766	1.9076	2.5186	703	1.966097378	0.004541685	20.93718794	0.048364904
12.17954983	×ÔÉí³µÁ¾	Road 1	109.9235082	58.09161758	-0.054015189	0.886012435	0.56078434	0	131.5616	980.999	655.766	1.9136	2.5145	704	1.939546713	0.004480353	20.96933651	0.048439167
12.19778893	×ÔÉí³µÁ¾	Road 1	110.2181083	58.14762726	-0.0548568	0.885466933	0.56078434	0	131.8845	981	655.7659	1.9224	2.5105	705	2.294653669	0.00530065	21.01118893	0.048535846
12.21288445	×ÔÉí³µÁ¾	Road 1	110.4620973	58.18684158	-0.055360615	0.883838296	0.56078434	0	132.1107	981	655.7658	1.9285	2.5074	706	2.058399115	0.004754902	21.04226153	0.048607624
12.2295261	×ÔÉí³µÁ¾	Road 1	110.7312578	58.22607651	-0.055427138	0.884144306	0.56078434	0	132.3371	981.001	655.7657	1.9345	2.5052	707	1.938803858	0.004478637	21.07452642	0.048682156
12.24618571	×ÔÉí³µÁ¾	Road 1	111.0010075	58.29060059	-0.055427138	0.884339154	0.56078434	0	132.596	981.002	655.7657	1.9421	2.5024	708	2.703342029	0.00624472	21.11956305	0.048786191
12.26287281	×ÔÉí³µÁ¾	Road 1	111.2713191	58.31582108	-0.055427138	0.883058369	0.56078434	0	132.8389	981.0039	655.7657	1.9465	2.5	709	1.515081827	0.003499839	21.14484537	0.048844593
12.27952472	×ÔÉí³µÁ¾	Road 1	111.5413205	58.37196121	-0.055427138	0.883406103	0.56078434	0	133.1792	981.0068	655.7656	1.9546	2.4977	710	2.453882129	0.005668468	21.1857072	0.048938984
12.29620339	×ÔÉí³µÁ¾	Road 1	111.8119378	58.41127853	-0.055427138	0.883250654	0.56078434	0	133.4063	981.0088	655.7656	1.9597	2.4965	711	1.943869033	0.004490337	21.21812836	0.049013877
12.31285091	×ÔÉí³µÁ¾	Road 1	112.0823356	58.47311783	-0.055427138	0.883444428	0.56078434	0	133.7635	981.0117	655.7655	1.9681	2.4938	712	2.630885363	0.006077345	21.26192606	0.049115049
12.32951015	×ÔÉí³µÁ¾	Road 1	112.353106	58.51246262	-0.055427138	0.882418752	0.56078434	0	133.991	981.0146	655.7655	1.9722	2.4936	713	1.948940099	0.004502052	21.29439393	0.04919005
12.34622218	×ÔÉí³µÁ¾	Road 1	112.624917	58.5518074	-0.055427138	0.88255769	0.56078434	0	134.2186	981.0176	655.7655	1.9763	2.4934	714	1.946275916	0.004495897	21.32692014	0.049265186
12.36285173	×ÔÉí³µÁ¾	Road 1	112.8955943	58.59959106	-0.055427138	0.882159948	0.56078434	0	134.4789	981.0215	655.7655	1.981	2.4935	715	2.210305085	0.005105805	21.36367653	0.049350093
12.37950658	×ÔÉí³µÁ¾	Road 1	113.1669563	58.655793	-0.055427138	0.881275535	0.56078434	0	134.8209	981.0264	655.7655	1.9871	2.4931	716	2.465937599	0.005696316	21.40474634	0.049444964
12.39620541	×ÔÉí³µÁ¾	Road 1	113.4392174	58.69512405	-0.055427138	0.881399155	0.56078434	0	135.0491	981.0303	655.7654	1.9912	2.4938	717	1.950832973	0.004506424	21.43732297	0.049520216
12.4129398	×ÔÉí³µÁ¾	Road 1	113.7122673	58.74009933	-0.055427138	0.881643653	0.56078434	0	135.2937	981.0342	655.7654	1.9956	2.4942	718	2.120651012	0.004898704	21.47281077	0.049602193
12.42976326	×ÔÉí³µÁ¾	Road 1	113.9870069	58.79067764	-0.055427138	0.880895674	0.56078434	0	135.6038	981.041	655.7655	1.9983	2.4964	719	2.28406586	0.005276192	21.51123666	0.049690957
12.44615528	×ÔÉí³µÁ¾	Road 1	114.254982	58.85242767	-0.055427138	0.880291879	0.56078434	0	135.9632	981.0479	655.7655	2.0038	2.4976	720	2.672676329	0.006173882	21.55504724	0.049792159
12.46287208	×ÔÉí³µÁ¾	Road 1	114.5284488	58.89169693	-0.055427138	0.87945348	0.56078434	0	136.1922	981.0527	655.7655	2.0059	2.4993	721	1.953195332	0.004511881	21.5876984	0.049867583
12.47955845	×ÔÉí³µÁ¾	Road 1	114.8016	58.93099365	-0.055427138	0.880129457	0.56078434	0	136.4212	981.0586	655.7655	2.0081	2.502	722	1.957317008	0.004521402	21.62035891	0.049943029
12.49616271	×ÔÉí³µÁ¾	Road 1	115.073601	58.97303696	-0.055427138	0.878603578	0.56078434	0	136.6668	981.0645	655.7655	2.0106	2.5043	723	2.048677013	0.004732444	21.65437568	0.050021608
12.51364524	×ÔÉí³µÁ¾	Road 1	115.3603432	59.04591064	-0.055427138	0.878047168	0.56078434	0	137.0929	981.0762	655.7656	2.0124	2.5093	724	2.884942448	0.006664217	21.70481177	0.050138115
12.52952481	×ÔÉí³µÁ¾	Road 1	115.6209671	59.0850769	-0.055427138	0.87744534	0.56078434	0	137.3225	981.082	655.7656	2.0146	2.5119	725	2.018533919	0.004662813	21.73686524	0.050212159
12.54617013	×ÔÉí³µÁ¾	Road 1	115.8943399	59.1242569	-0.055427138	0.877538562	0.56078434	0	137.5523	981.0889	655.7657	2.0148	2.5155	726	1.962139514	0.004532542	21.76952567	0.050287604
12.5628565	×ÔÉí³µÁ¾	Road 1	116.1685684	59.16342316	-0.055427138	0.876947284	0.56078434	0	137.7822	981.0957	655.7657	2.015	2.5185	727	1.959860333	0.004527277	21.80222862	0.050363148
12.57951061	×ÔÉí³µÁ¾	Road 1	116.4425514	59.22493973	-0.055427138	0.876978517	0.56078434	0	138.1438	981.1074	655.7658	2.0088	2.5178	728	2.650207076	0.006121978	21.84636547	0.050465104
12.59621934	×ÔÉí³µÁ¾	Road 1	116.7176145	59.26405792	-0.055427138	0.875933945	0.56078434	0	138.3741	981.1152	655.7659	2.0042	2.5185	729	1.959603848	0.004526685	21.87910796	0.050540739
12.61288628	×ÔÉí³µÁ¾	Road 1	116.9921705	59.30312805	-0.055427138	0.875670433	0.56078434	0	138.6045	981.123	655.7659	1.9995	2.5182	730	1.962228485	0.004532748	21.9118123	0.050616286
12.62955726	×ÔÉí³µÁ¾	Road 1	117.2670772	59.36451416	-0.055427138	0.874888599	0.56078434	0	138.9669	981.1357	655.766	1.9924	2.5193	731	2.649821748	0.006121088	21.95598741	0.050718331
12.64623849	×ÔÉí³µÁ¾	Road 1	117.542347	59.40633087	-0.055427138	0.874826074	0.56078434	0	139.2142	981.1445	655.7661	1.987	2.5197	732	2.048563155	0.004732181	21.99015998	0.05079727
12.66412313	×ÔÉí³µÁ¾	Road 1	117.8377658	59.4648674	-0.055427138	0.874384463	0.56078434	0	139.5607	981.1582	655.7662	1.9777	2.5222	733	2.443654301	0.005644841	22.03386386	0.050898226
12.67956981	×ÔÉí³µÁ¾	Road 1	118.0930816	59.50384827	-0.055427138	0.873453796	0.56078434	0	139.7919	981.167	655.7662	1.973	2.5228	734	2.060083263	0.004758792	22.0656853	0.050971733
12.69620523	×ÔÉí³µÁ¾	Road 1	118.3682259	59.54280853	-0.055427138	0.87319231	0.56078434	0	140.0232	981.1768	655.7664	1.9665	2.5245	735	1.967837146	0.004545704	22.09842109	0.051047353
12.71285384	×ÔÉí³µÁ¾	Road 1	118.6437686	59.58176193	-0.055427138	0.873023212	0.56078434	0	140.2546	981.1865	655.7664	1.9599	2.5271	736	1.967760777	0.004545527	22.13118158	0.051123029
12.72947276	×ÔÉí³µÁ¾	Road 1	118.9191021	59.64290085	-0.055427138	0.872342825	0.56078434	0	140.6186	981.2031	655.7666	1.9489	2.5312	737	2.65912827	0.006142586	22.17537343	0.051225113
12.74619212	×ÔÉí³µÁ¾	Road 1	119.1962803	59.68179932	-0.055413827	0.871813059	0.56078434	0	140.8504	981.2129	655.7667	1.9424	2.5338	738	1.963763575	0.004536294	22.2082063	0.051300957
12.76286126	×ÔÉí³µÁ¾	Road 1	119.4728061	59.72069778	-0.05533402	0.871800065	0.56078434	0	141.0824	981.2236	655.7668	1.9349	2.5364	739	1.968464451	0.004547153	22.24101891	0.051376754
12.77949375	×ÔÉí³µÁ¾	Road 1	119.7490057	59.78171997	-0.055294149	0.871042728	0.56078434	0	141.4471	981.2412	655.767	1.9229	2.5424	740	2.659450275	0.00614333	22.28525218	0.051478933
12.79624537	×ÔÉí³µÁ¾	Road 1	120.0273642	59.82053604	-0.055241011	0.87010324	0.56078434	0	141.6794	981.2529	655.7671	1.9145	2.546	741	1.962775615	0.004534012	22.31813184	0.051554885
12.8129189	×ÔÉí³µÁ¾	Road 1	120.3046178	59.86210556	-0.055227734	0.869709492	0.56078434	0	141.9285	981.2656	655.7672	1.9053	2.5502	742	2.054916134	0.004746856	22.35239457	0.051634031
12.82959025	×ÔÉí³µÁ¾	Road 1	120.5821043	59.92026443	-0.055095065	0.869793236	0.56078434	0	142.2774	981.2832	655.7673	1.8931	2.5566	743	2.571645916	0.005940502	22.39526735	0.051733068
12.84624509	×ÔÉí³µÁ¾	Road 1	120.8594955	59.95903931	-0.054896463	0.869344771	0.56078434	0	142.5102	981.2959	655.7675	1.8836	2.5611	744	1.972319479	0.004556058	22.42811603	0.051808948
12.86285742	×ÔÉí³µÁ¾	Road 1	121.1363575	59.99781418	-0.054527011	0.86910063	0.56078434	0	142.7431	981.3086	655.7676	1.8742	2.5666	745	1.976489975	0.004565692	22.46095012	0.051884795
12.88184026	×ÔÉí³µÁ¾	Road 1	121.4530335	60.05598679	-0.053897534	0.869900107	0.56078434	0	143.0928	981.3281	655.7678	1.86	2.5739	746	2.356805899	0.005444222	22.505689	0.051988142
12.89793134	×ÔÉí³µÁ¾	Road 1	121.7216418	60.09478226	-0.053078718	0.870007813	0.56078434	0	143.3261	981.3418	655.768	1.8496	2.5804	747	2.019118603	0.004664164	22.5381788	0.052063193
12.91595527	×ÔÉí³µÁ¾	Road 1	122.0228208	60.15582504	-0.051770672	0.870965481	0.56078434	0	143.6929	981.3623	655.7682	1.8347	2.5884	748	2.527645346	0.005838861	22.58373691	0.052168432
12.94630026	×ÔÉí³µÁ¾	Road 1	122.530376	60.21418991	-0.050284464	0.872085035	0.56078434	0	144.0434	981.3838	655.7684	1.8177	2.5985	749	1.768714732	0.004085731	22.63740853	0.052292414
12.9628378	×ÔÉí³µÁ¾	Road 1	122.8073308	60.2892952	-0.047963735	0.873876691	0.568627477	0	144.4944	981.4121	655.7687	1.7965	2.6118	750	3.13364933	0.00723873	22.6892314	0.052412125
12.97950401	×ÔÉí³µÁ¾	Road 1	123.0866219	60.32853699	-0.042326402	0.882746637	0.568627477	0	144.7285	981.4268	655.7689	1.7852	2.6193	751	1.996397104	0.004611677	22.72250377	0.052488984
12.99630988	×ÔÉí³µÁ¾	Road 1	123.3685304	60.38787689	-0.038908973	0.890393615	0.568627477	0	145.0799	981.4492	655.7692	1.7681	2.6305	752	2.611453044	0.006032457	22.7663915	0.052590364
13.01292184	×ÔÉí³µÁ¾	Road 1	123.6473698	60.42768173	-0.034970947	0.895020425	0.568627477	0	145.3144	981.4648	655.7693	1.7558	2.638	753	2.02088834	0.004668252	22.79996242	0.052667913
13.02949861	×ÔÉí³µÁ¾	Road 1	123.9258027	60.46765823	-0.030407347	0.89832449	0.568627477	0	145.549	981.4795	655.7695	1.7444	2.6454	754	2.030092078	0.004689513	22.83361478	0.05274565
13.0462187	×ÔÉí³µÁ¾	Road 1	124.206909	60.5249382	-0.026429337	0.901778638	0.568627477	0	145.7837	981.4951	655.7697	1.732	2.6519	755	2.561792146	0.00591774	22.87644818	0.052844595
13.06289077	×ÔÉí³µÁ¾	Road 1	124.4874207	60.57087479	-0.022726083	0.905176401	0.568627477	0	146.1528	981.5205	655.77	1.7124	2.6676	756	2.212827858	0.005111632	22.91334061	0.052929817
13.07959034	×ÔÉí³µÁ¾	Road 1	124.7685817	60.61113968	-0.018810377	0.907272458	0.568627477	0	146.3879	981.5361	655.7701	1.701	2.6751	757	2.033952507	0.00469843	22.94730674	0.053008279
13.09623162	×ÔÉí³µÁ¾	Road 1	125.0490409	60.67158508	-0.01558855	0.909086347	0.568627477	0	146.7409	981.5605	655.7704	1.682	2.6892	758	2.675414552	0.006180208	22.99182906	0.053111125
13.11283551	×ÔÉí³µÁ¾	Road 1	125.3290557	60.71186371	-0.012742374	0.909796178	0.568627477	0	146.9763	981.5762	655.7706	1.6697	2.6976	759	2.044555129	0.004722922	23.02577664	0.053189544
13.12949146	×ÔÉí³µÁ¾	Road 1	125.6101478	60.75498505	-0.009906615	0.910183847	0.568627477	0	147.2288	981.5938	655.7708	1.6557	2.7077	760	2.131364439	0.004923452	23.06127653	0.053271549
13.14615437	×ÔÉí³µÁ¾	Road 1	125.8916367	60.81530685	-0.007814679	0.910484314	0.568627477	0	147.5826	981.6182	655.7711	1.6368	2.7218	761	2.67467288	0.006178494	23.10584436	0.0533745
13.16286713	×ÔÉí³µÁ¾	Road 1	126.1741675	60.85833206	-0.006131699	0.910737932	0.568627477	0	147.8355	981.6357	655.7713	1.6238	2.7328	762	2.126830212	0.004912978	23.14138957	0.05345661
13.179537	×ÔÉí³µÁ¾	Road 1	126.456159	60.89845963	-0.004612484	0.910896957	0.568627477	0	148.0716	981.6523	655.7715	1.6105	2.7432	763	2.040100736	0.004712633	23.17539779	0.053535169
13.19651588	×ÔÉí³µÁ¾	Road 1	126.7436613	60.95855484	-0.003543292	0.91074121	0.568627477	0	148.4262	981.6768	655.7718	1.5925	2.7582	764	2.63777225	0.006093254	23.22018421	0.053638626
13.2128148	×ÔÉí³µÁ¾	Road 1	127.019831	60.99858627	-0.002688835	0.910573661	0.568627477	0	148.6628	981.6934	655.772	1.5792	2.7686	765	2.068726417	0.004778758	23.25390222	0.053716514
13.22950374	×ÔÉí³µÁ¾	Road 1	127.3028608	61.05571518	-0.001922618	0.90980345	0.568627477	0	148.8995	981.71	655.7722	1.5668	2.7789	766	2.580213849	0.005960294	23.29696324	0.053815985
13.24620587	×ÔÉí³µÁ¾	Road 1	127.5863263	61.09854126	-0.0014044	0.910022974	0.568627477	0	149.2549	981.7354	655.7725	1.5466	2.7959	767	2.128616797	0.004917105	23.33251567	0.053898111
13.26285961	×ÔÉí³µÁ¾	Road 1	127.8691553	61.1384697	-0.001024691	0.909238398	0.568627477	0	149.4919	981.752	655.7726	1.5343	2.8073	768	2.04187834	0.004716739	23.36652059	0.053976663
13.27948697	×ÔÉí³µÁ¾	Road 1	128.1518126	61.19833145	-0.000718245	0.909751832	0.568627477	0	149.8479	981.7773	655.7729	1.5154	2.8252	769	2.679108293	0.00618874	23.41106708	0.054079565
13.2961946	×ÔÉí³µÁ¾	Road 1	128.4360462	61.24392471	-0.000514406	0.909373224	0.568627477	0	150.1193	981.7969	655.7732	1.5008	2.8389	770	2.22011884	0.005128475	23.44816	0.05416525
13.31283661	×ÔÉí³µÁ¾	Road 1	128.7193609	61.2866272	-0.000357453	0.908019423	0.56078434	0	150.3739	981.8145	655.7734	1.4869	2.8509	771	2.135220637	0.00493236	23.48369437	0.054247334
13.32962855	×ÔÉí³µÁ¾	Road 1	129.0054135	61.3264183	-0.000223822	0.906717241	0.56078434	0	150.6118	981.832	655.7736	1.4736	2.8632	772	2.032449169	0.004694958	23.51782313	0.054326171
13.3461683	×ÔÉí³µÁ¾	Road 1	129.2874432	61.38588181	-0.000138291	0.902554989	0.56078434	0	150.9688	981.8574	655.7739	1.4547	2.8811	773	2.683752322	0.006199468	23.56221172	0.054428709
13.36284514	×ÔÉí³µÁ¾	Road 1	129.5720064	61.42815857	-7.81E-05	0.900201678	0.56078434	0	151.224	981.875	655.774	1.4418	2.8941	774	2.123074299	0.004904302	23.59761788	0.054510497
13.37950291	×ÔÉí³µÁ¾	Road 1	129.8564265	61.46753769	-3.52E-05	0.898719549	0.56078434	0	151.4623	981.8926	655.7743	1.4285	2.9064	775	2.033441881	0.004697251	23.63149051	0.054588743
13.39616656	×ÔÉí³µÁ¾	Road 1	130.1411804	61.5179924	-1.47E-05	0.895917952	0.56078434	0	151.7009	981.9092	655.7745	1.4163	2.9186	776	2.387520652	0.005515173	23.6712753	0.054680646
13.41278878	×ÔÉí³µÁ¾	Road 1	130.4254587	61.56829605	-4.72E-06	0.893144369	0.56078434	0	152.076	981.9365	655.7748	1.3958	2.9392	777	2.388409542	0.005517226	23.71097597	0.054772354
13.42951877	×ÔÉí³µÁ¾	Road 1	130.7117613	61.60729752	-6.90E-07	0.891214967	0.56078434	0	152.3149	981.9531	655.775	1.3835	2.9505	778	2.019942618	0.004666067	23.74476959	0.054850418
13.44613916	×ÔÉí³µÁ¾	Road 1	130.9964707	61.6684639	-1.22E-08	0.890217304	0.56078434	0	152.6906	981.9805	655.7753	1.363	2.9706	779	2.739987788	0.006329372	23.79030925	0.054955614
13.46283542	×ÔÉí³µÁ¾	Road 1	131.2826601	61.70732803	4.73E-08	0.888879299	0.56078434	0	152.9299	981.9971	655.7755	1.3508	2.9825	780	2.020862604	0.004668193	23.82405011	0.055033556
13.47951153	×ÔÉí³µÁ¾	Road 1	131.5686838	61.74615097	9.01E-07	0.889173031	0.56078434	0	153.1693	982.0146	655.7757	1.3375	2.9957	781	2.022129211	0.004671118	23.85777135	0.055111452
13.49626718	×ÔÉí³µÁ¾	Road 1	131.8563428	61.80437164	3.21E-06	0.888161898	0.56078434	0	153.5288	982.04	655.776	1.3187	3.0145	782	2.635699319	0.006088465	23.9019342	0.055213468
13.51308257	×ÔÉí³µÁ¾	Road 1	132.1452345	61.84866714	6.92E-06	0.887194216	0.56078434	0	153.8029	982.0596	655.7762	1.3042	3.0291	783	2.188519003	0.005055479	23.93873502	0.055298478
13.52949476	×ÔÉí³µÁ¾	Road 1	132.4273754	61.88740082	1.18E-05	0.88749963	0.56078434	0	154.0428	982.0771	655.7764	1.291	3.0423	784	2.043178675	0.004719743	23.97226804	0.055375939
13.54619835	×ÔÉí³µÁ¾	Road 1	132.7147058	61.92614822	1.55E-05	0.887343287	0.56078434	0	154.283	982.0947	655.7766	1.2768	3.0555	785	2.022682228	0.004672396	24.00605411	0.055453985
13.56281544	×ÔÉí³µÁ¾	Road 1	133.0008163	61.98423843	1.79E-05	0.886493683	0.56078434	0	154.6435	982.1201	655.7769	1.2579	3.0744	786	2.653810289	0.006130302	24.05015272	0.055555853
13.57948165	×ÔÉí³µÁ¾	Road 1	133.2879517	62.02294464	1.85E-05	0.886593521	0.56078434	0	154.884	982.1377	655.7771	1.2448	3.0876	787	2.02683986	0.004682	24.08393245	0.055633884
13.59617829	×ÔÉí³µÁ¾	Road 1	133.5758804	62.08100052	1.85E-05	0.886815548	0.56078434	0	155.245	982.1631	655.7775	1.2259	3.1055	788	2.647453242	0.006115617	24.12813601	0.055735994
13.61284706	×ÔÉí³µÁ¾	Road 1	133.8635208	62.12245331	1.85E-05	0.886244178	0.56078434	0	155.5031	982.1816	655.7776	1.2121	3.1194	789	2.117822789	0.004892171	24.16343752	0.055817541
13.63098462	×ÔÉí³µÁ¾	Road 1	134.1767991	62.18046112	1.85E-05	0.886441767	0.56078434	0	155.8648	982.208	655.778	1.1923	3.1392	790	2.501422835	0.005778287	24.20880724	0.055922345
13.64944366	×ÔÉí³µÁ¾	Road 1	134.4958283	62.219133	1.81E-05	0.885672033	0.56078434	0	156.106	982.2256	655.7782	1.1791	3.1524	791	1.910055828	0.004412229	24.24406502	0.05600379
13.6646759	×ÔÉí³µÁ¾	Road 1	134.7592638	62.26053772	1.79E-05	0.885117948	0.56078434	0	156.3647	982.2441	655.7784	1.1653	3.1663	792	2.246316568	0.005188991	24.27828146	0.05608283
13.67996349	×ÔÉí³µÁ¾	Road 1	135.0238205	62.29918213	1.79E-05	0.886019945	0.56078434	0	156.6063	982.2607	655.7786	1.1531	3.1785	793	2.145079659	0.004955134	24.31107456	0.056158582
13.69611139	×ÔÉí³µÁ¾	Road 1	135.3035251	62.35712814	1.79E-05	0.884774804	0.56078434	0	156.969	982.2871	655.7789	1.1333	3.1983	794	2.717879759	0.006278302	24.3549626	0.056259964
13.71281389	×ÔÉí³µÁ¾	Road 1	135.5930283	62.398526	1.79E-05	0.885666788	0.56078434	0	157.2282	982.3057	655.7791	1.1195	3.2122	795	2.121424176	0.00490049	24.39039568	0.056341814
13.72947423	×ÔÉí³µÁ¾	Road 1	135.8819795	62.43714981	1.79E-05	0.884696901	0.56078434	0	157.4703	982.3232	655.7793	1.1063	3.2254	796	2.036148775	0.004703504	24.42431862	0.056420176
13.74613311	×ÔÉí³µÁ¾	Road 1	136.1711732	62.49505463	1.79E-05	0.884914458	0.56078434	0	157.8338	982.3486	655.7796	1.0875	3.2442	797	2.662476783	0.006150321	24.4686725	0.056522633
13.76281031	×ÔÉí³µÁ¾	Road 1	136.4608639	62.53365784	1.82E-05	0.885195136	0.56078434	0	158.0763	982.3662	655.7798	1.0744	3.2574	798	2.036899504	0.004705238	24.50264229	0.056601104
13.7794472	×ÔÉí³µÁ¾	Road 1	136.7500326	62.57225418	1.93E-05	0.884644389	0.56078434	0	158.3189	982.3838	655.78	1.0612	3.2706	799	2.04078138	0.004714205	24.53659453	0.056679533
13.79619771	×ÔÉí³µÁ¾	Road 1	137.0414585	62.63288498	2.05E-05	0.884433508	0.56078434	0	158.7005	982.4111	655.7803	1.0408	3.291	800	2.745404275	0.006341884	24.58258147	0.056785763
13.81286869	×ÔÉí³µÁ¾	Road 1	137.3316791	62.67145386	2.26E-05	0.88428247	0.56078434	0	158.9436	982.4287	655.7805	1.0277	3.3042	801	2.040081467	0.004712588	24.61659161	0.056864327
13.82950594	×ÔÉí³µÁ¾	Road 1	137.6215544	62.72377625	2.53E-05	0.884152055	0.56078434	0	159.1867	982.4463	655.7808	1.0145	3.3174	802	2.491853357	0.005756181	24.6580492	0.056960094
13.84613329	×ÔÉí³µÁ¾	Road 1	137.9114609	62.76785889	2.80E-05	0.884132147	0.56078434	0	159.5518	982.4717	655.781	0.9957	3.3362	803	2.225808428	0.005141617	24.69505851	0.057045585
13.86313636	×ÔÉí³µÁ¾	Road 1	138.2081004	62.80641403	3.07E-05	0.884212673	0.56078434	0	159.7953	982.4893	655.7813	0.9825	3.3493	804	2.018872474	0.004663595	24.72938554	0.057124881
13.87947487	×ÔÉí³µÁ¾	Road 1	138.4934081	62.86422272	3.47E-05	0.884011745	0.56078434	0	160.1609	982.5156	655.7816	0.9628	3.3691	805	2.710254462	0.006260688	24.77366706	0.057227171
13.89612605	×ÔÉí³µÁ¾	Road 1	138.784354	62.90276413	3.87E-05	0.883450329	0.56078434	0	160.4049	982.5332	655.7817	0.9496	3.3822	806	2.047103701	0.00472881	24.80775375	0.057305911
13.91287254	×ÔÉí³µÁ¾	Road 1	139.0771444	62.94130554	4.40E-05	0.884132147	0.568627477	0	160.6489	982.5508	655.782	0.9364	3.3954	807	2.041011517	0.004714737	24.84193352	0.057384866
13.92948083	×ÔÉí³µÁ¾	Road 1	139.3677988	63.00201874	5.07E-05	0.887541294	0.568627477	0	161.0328	982.5781	655.7823	0.916	3.4158	808	2.779388998	0.006420389	24.88809442	0.057491498
13.94704437	×ÔÉí³µÁ¾	Road 1	139.67536	63.04083481	5.79E-05	0.891471326	0.568627477	0	161.2773	982.5957	655.7825	0.9029	3.429	809	1.993969261	0.004606069	24.92311558	0.057572397
13.96277769	×ÔÉí³µÁ¾	Road 1	139.9510419	63.07980194	6.60E-05	0.894138038	0.568627477	0	161.5219	982.6133	655.7827	0.8897	3.4421	810	2.140351514	0.004944212	24.95679042	0.057650186
13.9795381	×ÔÉí³µÁ¾	Road 1	140.2449936	63.13842087	8.20E-05	0.895507932	0.568627477	0	161.8891	982.6396	655.783	0.87	3.4618	811	2.698548839	0.006233648	25.00201921	0.057754664
13.9961211	×ÔÉí³µÁ¾	Road 1	140.5360139	63.17754593	0.0001027	0.896192849	0.568627477	0	162.1341	982.6572	655.7832	0.8568	3.475	812	2.079135772	0.004802804	25.03649752	0.057834309
14.01281114	×ÔÉí³µÁ¾	Road 1	140.8290942	63.21669846	0.000127564	0.896613896	0.568627477	0	162.3792	982.6748	655.7834	0.8437	3.4881	813	2.07287349	0.004788338	25.07109385	0.057914227
14.02949311	×ÔÉí³µÁ¾	Road 1	141.122318	63.27824936	0.000163152	0.896784902	0.568627477	0	162.7647	982.7021	655.7837	0.8233	3.5085	814	2.808873414	0.006488498	25.11795139	0.058022468
14.04617361	×ÔÉí³µÁ¾	Road 1	141.4156977	63.31744995	0.000204811	0.897679806	0.568627477	0	163.0103	982.7197	655.7839	0.8102	3.5216	815	2.078008571	0.0048002	25.15261362	0.058102537
14.06280793	×ÔÉí³µÁ¾	Road 1	141.7084463	63.35665741	0.000263038	0.896918774	0.568627477	0	163.256	982.7373	655.7841	0.797	3.5347	816	2.08290725	0.004811516	25.18726137	0.058182574
14.07945508	×ÔÉí³µÁ¾	Road 1	142.0016926	63.4154686	0.000357453	0.897410333	0.568627477	0	163.5194	982.7568	655.7844	0.7823	3.5494	817	2.728436169	0.006302688	25.23268205	0.058287496
14.09617407	×ÔÉí³µÁ¾	Road 1	142.2963996	63.45748444	0.000474906	0.898440421	0.576470613	0	163.8884	982.7832	655.7847	0.7626	3.5691	818	2.171259314	0.005015609	25.26898331	0.058371351
14.11283698	×ÔÉí³µÁ¾	Road 1	142.5903911	63.51648788	0.000630314	0.902219951	0.576470613	0	164.2578	982.8096	655.785	0.7429	3.5887	819	2.736800117	0.006322008	25.31458637	0.058476695
14.12945774	×ÔÉí³µÁ¾	Road 1	142.8838214	63.55602493	0.00086283	0.905720413	0.576470613	0	164.5043	982.8271	655.7852	0.7297	3.6018	820	2.100459815	0.004852062	25.3494976	0.058557339
14.1461562	×ÔÉí³µÁ¾	Road 1	143.1788076	63.59568558	0.001124547	0.907573164	0.576470613	0	164.7509	982.8447	655.7854	0.7166	3.6149	821	2.099566785	0.004849999	25.38455714	0.058638327
14.16281948	×ÔÉí³µÁ¾	Road 1	143.4733562	63.63543549	0.001446141	0.909217775	0.576470613	0	164.9977	982.8623	655.7856	0.7035	3.628	822	2.106393442	0.004865769	25.41965655	0.058719407
14.17943913	×ÔÉí³µÁ¾	Road 1	143.7674357	63.70083847	0.001859617	0.910012066	0.576470613	0	165.4034	982.8916	655.7859	0.6815	3.65	823	2.960714214	0.00683925	25.46886261	0.058833073
14.19614383	×ÔÉí³µÁ¾	Road 1	144.0632048	63.74068451	0.002287532	0.910657465	0.576470613	0	165.6506	982.9092	655.7861	0.6684	3.663	824	2.109292503	0.004872466	25.5040977	0.058914466
14.21284706	×ÔÉí³µÁ¾	Road 1	144.3592253	63.8004776	0.002780136	0.910627127	0.576470613	0	166.0216	982.9355	655.7864	0.6488	3.6827	825	2.76902985	0.006396459	25.55034944	0.059021307
14.22945352	×ÔÉí³µÁ¾	Road 1	144.6537149	63.8403511	0.003419223	0.911450446	0.576470613	0	166.2692	982.9531	655.7866	0.6357	3.6957	826	2.120816585	0.004899086	25.5855687	0.059102664
14.24957672	×ÔÉí³µÁ¾	Road 1	145.0109026	63.90017853	0.004069572	0.910940707	0.576470613	0	166.6409	982.9795	655.787	0.616	3.7163	827	2.43802565	0.005631839	25.63462957	0.059215994
14.26662708	×ÔÉí³µÁ¾	Road 1	145.3137362	63.9400589	0.004802772	0.911344767	0.576470613	0	166.8888	982.9971	655.7872	0.6029	3.7294	828	2.089352432	0.004826404	25.67025378	0.059298286
14.29623052	×ÔÉí³µÁ¾	Road 1	145.8401825	64.01980591	0.00578275	0.911318839	0.576470613	0	167.3852	983.0322	655.7876	0.5777	3.7555	829	2.287392373	0.005283876	25.73796847	0.059454707
14.31285347	×ÔÉí³µÁ¾	Road 1	146.1360693	64.07961273	0.00675926	0.910886884	0.576470613	0	167.7579	983.0586	655.7878	0.5581	3.7751	830	2.789862076	0.006444581	25.78434422	0.059561835
14.32953361	×ÔÉí³µÁ¾	Road 1	146.4331585	64.11944504	0.008588844	0.910364866	0.576470613	0	168.0066	983.0762	655.7881	0.545	3.7882	831	2.121535706	0.004900747	25.81973173	0.05964358
14.3461507	×ÔÉí³µÁ¾	Road 1	146.7294006	64.1791832	0.009696959	0.910173893	0.576470613	0	168.3799	983.1025	655.7884	0.5254	3.8078	832	2.792146666	0.006449859	25.86612908	0.059750758
14.36286163	×ÔÉí³µÁ¾	Road 1	147.0275002	64.2189743	0.010860546	0.909641385	0.576470613	0	168.6289	983.1201	655.7886	0.5123	3.8208	833	2.120555273	0.004898483	25.90156553	0.059832616
14.37946186	×ÔÉí³µÁ¾	Road 1	147.3238084	64.25873795	0.012133008	0.909046173	0.576470613	0	168.8781	983.1377	655.7888	0.4993	3.8349	834	2.129579703	0.004919329	25.93691704	0.059914278
14.39613943	×ÔÉí³µÁ¾	Road 1	147.6217735	64.31835938	0.013238151	0.908330023	0.576470613	0	169.2522	983.1641	655.7891	0.4797	3.8544	835	2.786422956	0.006436637	25.98338781	0.060021626
14.41288811	×ÔÉí³µÁ¾	Road 1	147.9211937	64.35807495	0.014343488	0.908469439	0.576470613	0	169.5018	983.1807	655.7893	0.4676	3.8665	836	2.119008457	0.00489491	26.01887841	0.060103609
14.42947955	×ÔÉí³µÁ¾	Road 1	148.2179858	64.39777679	0.015542889	0.907334507	0.576470613	0	169.7516	983.1982	655.7895	0.4546	3.8805	837	2.132174339	0.004925323	26.05425423	0.060185327
14.44614136	×ÔÉí³µÁ¾	Road 1	148.516312	64.45726089	0.016633745	0.906907737	0.576470613	0	170.1266	983.2236	655.7898	0.436	3.8991	838	2.789090617	0.006442799	26.10072553	0.060292676
14.46284055	×ÔÉí³µÁ¾	Road 1	148.8154917	64.49690781	0.017730869	0.906583369	0.576470613	0	170.3768	983.2412	655.79	0.423	3.9131	839	2.124558243	0.00490773	26.13620395	0.060374631
14.47944628	×ÔÉí³µÁ¾	Road 1	149.1131793	64.53649979	0.018862229	0.905188203	0.576470613	0	170.6271	983.2578	655.7902	0.411	3.9252	840	2.131285822	0.00492327	26.1715955	0.060456386
14.49654136	×ÔÉí³µÁ¾	Road 1	149.4199348	64.59869614	0.019785127	0.904488862	0.576470613	0	171.0208	983.2842	655.7905	0.3927	3.9453	841	2.832553016	0.006543197	26.22001822	0.060568242
14.51277796	×ÔÉí³µÁ¾	Road 1	149.7114642	64.63826065	0.020585984	0.904122174	0.576470613	0	171.2715	983.3008	655.7906	0.3807	3.9584	842	2.163498375	0.004997681	26.25514608	0.060649387
14.53055007	×ÔÉí³µÁ¾	Road 1	150.0308704	64.70038147	0.021379944	0.904087543	0.576470613	0	171.6659	983.3271	655.791	0.3615	3.9786	843	2.756707771	0.006367995	26.30413859	0.06076256
14.54617599	×ÔÉí³µÁ¾	Road 1	150.3118761	64.73990479	0.021963486	0.903184772	0.576470613	0	171.917	983.3438	655.7911	0.3495	3.9916	844	2.218219073	0.005124086	26.33880031	0.060842629
14.56398476	×ÔÉí³µÁ¾	Road 1	150.6324157	64.79632645	0.022506425	0.903032541	0.576470613	0	172.2761	983.3672	655.7914	0.3326	4.0095	845	2.577288416	0.005953536	26.38469863	0.060948654
14.5795612	×ÔÉí³µÁ¾	Road 1	150.9129466	64.83583603	0.02285856	0.903322458	0.576470613	0	172.5276	983.3838	655.7916	0.3215	4.0225	846	2.225069432	0.00513991	26.41935729	0.061028715
14.59652835	×ÔÉí³µÁ¾	Road 1	151.2187104	64.87533188	0.023073077	0.902605295	0.576470613	0	172.7793	983.3994	655.7917	0.3105	4.0345	847	2.109262682	0.004872397	26.45514547	0.061111386
14.61276972	×ÔÉí³µÁ¾	Road 1	151.5115731	64.914814	0.02319945	0.902432978	0.576470613	0	173.0312	983.416	655.792	0.2984	4.0476	848	2.168227785	0.005008606	26.49036046	0.061192733
14.62944216	×ÔÉí³µÁ¾	Road 1	151.8124962	64.97690048	0.023288932	0.902406871	0.576470613	0	173.4273	983.4414	655.7922	0.2803	4.0668	849	2.895453437	0.006688497	26.53863473	0.061304246
14.64618937	×ÔÉí³µÁ¾	Road 1	152.1149527	65.01636887	0.02333376	0.901656389	0.576470613	0	173.6796	983.457	655.7924	0.2702	4.0798	850	2.129446902	0.004919022	26.57429704	0.061386626
14.66420194	×ÔÉí³µÁ¾	Road 1	152.4405721	65.07844162	0.02337116	0.902174532	0.576470613	0	174.0764	983.4814	655.7927	0.253	4.0981	851	2.743338399	0.006337112	26.62371161	0.061500774
14.67944738	×ÔÉí³µÁ¾	Road 1	152.7163364	65.1179306	0.023446079	0.902498841	0.576470613	0	174.329	983.4971	655.7928	0.242	4.1111	852	2.263668848	0.005229075	26.65822223	0.061580493
14.69669678	×ÔÉí³µÁ¾	Road 1	153.0285382	65.15744019	0.023551235	0.902082562	0.576470613	0	174.5819	983.5127	655.793	0.2319	4.1231	853	2.096138949	0.004842081	26.69437937	0.061664016
14.71281975	×ÔÉí³µÁ¾	Road 1	153.3205295	65.19693604	0.023679346	0.901622653	0.576470613	0	174.8349	983.5283	655.7932	0.2209	4.1351	854	2.186883641	0.005051701	26.72963843	0.061745465
14.72950795	×ÔÉí³µÁ¾	Road 1	153.6230453	65.25909805	0.023861	0.90525353	0.576470613	0	175.2328	983.5518	655.7935	0.2047	4.1534	855	2.907297396	0.006715857	26.778156	0.06185754
14.74614374	×ÔÉí³µÁ¾	Road 1	153.9247904	65.29792786	0.024043581	0.872766674	0.576470613	0	175.4862	983.5664	655.7936	0.1957	4.1654	856	2.124628406	0.004907892	26.81350086	0.061939187
14.76281911	×ÔÉí³µÁ¾	Road 1	154.2275003	65.35121155	0.024250092	0.777285397	0.576470613	0	175.8667	983.5889	655.7938	0.1801	4.1829	857	2.612170104	0.006034113	26.85705977	0.062039808
14.77949192	×ÔÉí³µÁ¾	Road 1	154.5303087	65.38252258	0.024511823	0.701674223	0.576470613	0	176.1205	983.6025	655.794	0.1721	4.193	858	1.869393988	0.0043183	26.88822781	0.062111806
14.79615116	×ÔÉí³µÁ¾	Road 1	154.8330003	65.41053085	0.024752095	0.637045562	0.576470613	0	176.3745	983.6152	655.7941	0.164	4.2031	859	1.758912867	0.004063089	26.91752997	0.062179494
14.81279721	×ÔÉí³µÁ¾	Road 1	155.1356256	65.44802856	0.02501742	0.577463269	0.576470613	0	176.7559	983.6328	655.7943	0.1543	4.2167	860	2.082774336	0.004811209	26.95219993	0.062259582
14.82949457	×ÔÉí³µÁ¾	Road 1	155.4393037	65.47386703	0.025324089	0.575545251	0.576470613	0	177.0285	983.6436	655.7944	0.1486	4.2255	861	1.684656526	0.003891557	26.98032926	0.062324561
14.84618351	×ÔÉí³µÁ¾	Road 1	155.7429461	65.49924545	0.02565714	0.605141699	0.576470613	0	177.2831	983.6523	655.7944	0.1454	4.2326	862	1.670038092	0.003857788	27.00820042	0.062388943
14.86280866	×ÔÉí³µÁ¾	Road 1	156.0456241	65.54168701	0.026009168	0.662985802	0.576470613	0	177.6653	983.6631	655.7945	0.1426	4.2423	863	2.25526052	0.005209652	27.04569447	0.062475554
14.87945948	×ÔÉí³µÁ¾	Road 1	156.3489269	65.57577896	0.026372515	0.707787156	0.576470613	0	177.9386	983.6699	655.7946	0.1417	4.2492	864	1.970039107	0.00455079	27.07849722	0.062551329
14.89729756	×ÔÉí³µÁ¾	Road 1	156.6740273	65.61024857	0.026698316	0.747220337	0.576470613	0	178.1937	983.6748	655.7946	0.1435	4.2543	865	1.905666261	0.004402089	27.11249067	0.062629853
14.91322296	×ÔÉí³µÁ¾	Road 1	156.9645161	65.66615524	0.02699382	0.799146712	0.576470613	0	178.5767	983.6836	655.7946	0.1437	4.266	866	2.802065997	0.006472772	27.15711468	0.062732935
14.92941338	×ÔÉí³µÁ¾	Road 1	157.2600167	65.70567169	0.027216874	0.826362371	0.576470613	0	178.8322	983.6885	655.7946	0.1454	4.2732	867	2.196539547	0.005074006	27.19267758	0.062815085
14.94608216	×ÔÉí³µÁ¾	Road 1	157.5644375	65.74657516	0.027349632	0.850280583	0.576470613	0	179.0879	983.6934	655.7946	0.1462	4.2813	868	2.20518502	0.005093977	27.22943531	0.062899996
14.96276926	×ÔÉí³µÁ¾	Road 1	157.8694853	65.80964355	0.027374573	0.880140781	0.576470613	0	179.4717	983.7002	655.7946	0.1493	4.293	869	2.960302662	0.006838299	27.27883418	0.063014107
14.97948055	×ÔÉí³µÁ¾	Road 1	158.1751737	65.85235977	0.027374573	0.894373834	0.576470613	0	179.7277	983.7051	655.7946	0.1511	4.3011	870	2.266391804	0.005235365	27.31670852	0.063101597
14.99616766	×ÔÉí³µÁ¾	Road 1	158.480718	65.91674652	0.027366258	0.910047472	0.576470613	0	180.1121	983.7119	655.7946	0.1542	4.3138	871	3.009595474	0.006952166	27.36692995	0.063217608
15.01281737	×ÔÉí³µÁ¾	Road 1	158.7857758	65.95956573	0.027366258	0.915477097	0.576470613	0	180.3685	983.7158	655.7946	0.157	4.3209	872	2.278505088	0.005263347	27.40486641	0.063305241
15.02956825	×ÔÉí³µÁ¾	Road 1	159.0928847	66.00201416	0.027316403	0.916099966	0.576470613	0	180.6251	983.7207	655.7946	0.1588	4.329	873	2.258304298	0.005216683	27.442695	0.063392625
15.04614905	×ÔÉí³µÁ¾	Road 1	159.3971637	66.0646431	0.027233446	0.913353443	0.576470613	0	181.0103	983.7275	655.7946	0.1619	4.3397	874	2.96932479	0.00685914	27.49192878	0.063506355
15.06285338	×ÔÉí³µÁ¾	Road 1	159.7039007	66.10580063	0.027158929	0.910713792	0.576470613	0	181.2672	983.7324	655.7946	0.1627	4.3468	875	2.221297256	0.005131197	27.52903407	0.063592069
15.07945434	×ÔÉí³µÁ¾	Road 1	160.0089277	66.14659424	0.027076291	0.909196496	0.576470613	0	181.5244	983.7363	655.7946	0.1655	4.352	876	2.218726847	0.005125259	27.56586706	0.063677153
15.09611835	×ÔÉí³µÁ¾	Road 1	160.3153939	66.20726624	0.02699382	0.90709132	0.576470613	0	181.9104	983.7422	655.7946	0.1686	4.3597	877	2.897174132	0.006692472	27.6141456	0.063788676
15.11279116	×ÔÉí³µÁ¾	Road 1	160.6222082	66.24746933	0.026903298	0.906361818	0.576470613	0	182.1679	983.7451	655.7945	0.1714	4.3629	878	2.195328645	0.005071209	27.65074789	0.063873228
15.12951199	×ÔÉí³µÁ¾	Road 1	160.9301054	66.29039154	0.026771989	0.905520439	0.576470613	0	182.444	983.749	655.7945	0.1682	4.3615	879	2.285693547	0.005279952	27.68896657	0.063961513
15.14613971	×ÔÉí³µÁ¾	Road 1	161.2365648	66.35028076	0.026608454	0.9044469	0.576470613	0	182.8309	983.7529	655.7944	0.1655	4.3564	880	2.880371468	0.006653658	27.73686058	0.064072148
15.16278026	×ÔÉí³µÁ¾	Road 1	161.5434579	66.39295578	0.026461843	0.903963387	0.576470613	0	183.1074	983.7549	655.7944	0.1647	4.3534	881	2.287351744	0.005283783	27.77492337	0.064160073
15.17943107	×ÔÉí³µÁ¾	Road 1	161.8507244	66.43275375	0.026251025	0.903903961	0.576470613	0	183.3657	983.7578	655.7944	0.1636	4.3507	882	2.188498833	0.005055432	27.81136366	0.06424425
15.19608042	×ÔÉí³µÁ¾	Road 1	162.1582396	66.49238205	0.02605742	0.904222131	0.576470613	0	183.7534	983.7598	655.7943	0.1648	4.3446	883	2.874215274	0.006639437	27.85921747	0.064354792
15.21288042	×ÔÉí³µÁ¾	Road 1	162.4687229	66.53211823	0.025824755	0.905340672	0.58431375	0	184.0121	983.7617	655.7943	0.1646	4.3409	884	2.177010208	0.005028894	27.89579124	0.064439278
15.22951144	×ÔÉí³µÁ¾	Road 1	162.7763327	66.58613663	0.025577579	0.907002211	0.58431375	0	184.2894	983.7627	655.7942	0.1658	4.3359	885	2.686178832	0.006205073	27.94046513	0.064542474
15.24610617	×ÔÉí³µÁ¾	Road 1	163.083416	66.61753006	0.025260979	0.911345005	0.58431375	0	184.5669	983.7637	655.7941	0.1689	4.3318	886	1.906985752	0.004405137	27.97211105	0.064615577
15.26282186	×ÔÉí³µÁ¾	Road 1	163.3930307	66.68063278	0.024923561	0.915892959	0.58431375	0	184.9742	983.7656	655.7941	0.1714	4.3254	887	2.992984306	0.006913794	28.02214085	0.064731145
15.27947231	×ÔÉí³µÁ¾	Road 1	163.7016232	66.72089767	0.024550471	0.916862667	0.58431375	0	185.2336	983.7656	655.7939	0.1742	4.3207	888	2.212881651	0.005111757	28.05898632	0.064816258
15.29614145	×ÔÉí³µÁ¾	Road 1	164.0107489	66.76124496	0.0240741	0.918604016	0.58431375	0	185.4931	983.7666	655.7939	0.1759	4.316	889	2.215324617	0.0051174	28.09591388	0.064901561
15.31279006	×ÔÉí³µÁ¾	Road 1	164.3198007	66.82758865	0.023603931	0.919524312	0.58431375	0	185.9199	983.7666	655.7938	0.1808	4.3083	890	3.120018449	0.007207243	28.14785786	0.065021552
15.32950209	×ÔÉí³µÁ¾	Road 1	164.6302175	66.86801834	0.023006361	0.9208799	0.58431375	0	186.1799	983.7666	655.7937	0.1836	4.3026	891	2.217647583	0.005122766	28.18491925	0.065107163
15.34614777	×ÔÉí³µÁ¾	Road 1	164.9396825	66.9287178	0.022397131	0.92186141	0.58431375	0	186.5701	983.7666	655.7936	0.1887	4.2945	892	2.928756733	0.006765428	28.2336704	0.065219779
15.36278135	×ÔÉí³µÁ¾	Road 1	165.2491099	66.96923676	0.021777326	0.922507286	0.58431375	0	186.8305	983.7666	655.7935	0.1915	4.2898	893	2.230255737	0.005151891	28.27076755	0.065305473
15.37949192	×ÔÉí³µÁ¾	Road 1	165.5601572	67.00974197	0.021078113	0.921709895	0.58431375	0	187.091	983.7666	655.7933	0.1943	4.2851	894	2.224451638	0.005138483	28.30793939	0.06539134
15.39614126	×ÔÉí³µÁ¾	Road 1	165.8703598	67.07346954	0.02023725	0.924003839	0.58431375	0	187.5007	983.7656	655.793	0.2008	4.2757	895	3.039304855	0.007020794	28.35854183	0.065508232
15.41284303	×ÔÉí³µÁ¾	Road 1	166.1817275	67.11409149	0.019425668	0.925171316	0.58431375	0	187.7617	983.7646	655.7926	0.2045	4.27	896	2.232240603	0.005156476	28.39582418	0.065594354
15.42945242	×ÔÉí³µÁ¾	Road 1	166.4915608	67.15476837	0.018552542	0.926835299	0.58431375	0	188.0228	983.7646	655.7922	0.2073	4.2643	897	2.243177906	0.005181741	28.43308201	0.065680419
15.44613182	×ÔÉí³µÁ¾	Road 1	166.8029974	67.21892853	0.0175077	0.929503918	0.58431375	0	188.4333	983.7627	655.7914	0.2148	4.2549	898	3.056294379	0.00706004	28.48405918	0.065798177
15.46284385	×ÔÉí³µÁ¾	Road 1	167.1152602	67.26568222	0.01658011	0.931930125	0.58431375	0	188.7322	983.7617	655.7908	0.2193	4.2475	899	2.448884914	0.005656924	28.52498501	0.065892715
15.47939753	×ÔÉí³µÁ¾	Road 1	167.4247662	67.30962753	0.01568014	0.934334159	0.58431375	0	189.0126	983.7607	655.79	0.2234	4.2415	900	2.367232203	0.005468306	28.5641714	0.065983236
15.49608243	×ÔÉí³µÁ¾	Road 1	167.7369164	67.350737	0.014675714	0.937149763	0.58431375	0	189.2744	983.7598	655.7893	0.2282	4.2348	901	2.257481908	0.005214783	28.60183727	0.066070244
15.51279519	×ÔÉí³µÁ¾	Road 1	168.0498755	67.41272736	0.013830856	0.941321075	0.58431375	0	189.6675	983.7578	655.788	0.2343	4.2257	902	2.984208661	0.006893522	28.65171164	0.066185454
15.54892297	×ÔÉí³µÁ¾	Road 1	168.7272874	67.50161362	0.013044412	0.944566071	0.58431375	0	190.2296	983.7549	655.7859	0.2446	4.2116	903	2.259294637	0.005218971	28.73333492	0.066374004
15.56512951	×ÔÉí³µÁ¾	Road 1	169.0314624	67.5671196	0.012244535	0.950182796	0.58431375	0	190.6423	983.7529	655.7842	0.2521	4.2022	904	3.184524076	0.007356251	28.78494506	0.066493223
15.5796697	×ÔÉí³µÁ¾	Road 1	169.3045309	67.60897751	0.010748683	0.953331828	0.568627477	0	190.9052	983.751	655.783	0.2578	4.1945	905	2.507323334	0.005791917	28.821402	0.066577439
15.59611817	×ÔÉí³µÁ¾	Road 1	169.6136288	67.65078735	0.010140704	0.946009636	0.568627477	0	191.1682	983.749	655.7817	0.2636	4.1878	906	2.311782041	0.005340217	28.85942729	0.066665277
15.61284523	×ÔÉí³µÁ¾	Road 1	169.9282508	67.71301117	0.009655385	0.943925977	0.568627477	0	191.563	983.7471	655.7797	0.2708	4.1786	907	3.002475268	0.006935718	28.90964986	0.066781291
15.62949714	×ÔÉí³µÁ¾	Road 1	170.2416508	67.75437469	0.009153715	0.943335295	0.568627477	0	191.8264	983.7451	655.7782	0.2765	4.1709	908	2.281001196	0.005269113	28.9476329	0.066869032
15.6461091	×ÔÉí³µÁ¾	Road 1	170.5544895	67.79569016	0.008646569	0.942003489	0.56078434	0	192.09	983.7432	655.7767	0.2823	4.1642	909	2.284014574	0.005276074	28.98557485	0.066956678
15.66281526	×ÔÉí³µÁ¾	Road 1	170.8693891	67.85751572	0.008255359	0.938690662	0.56078434	0	192.4857	983.7402	655.7743	0.2905	4.1541	910	2.997004874	0.006923081	29.0356433	0.067072336
15.67947744	×ÔÉí³µÁ¾	Road 1	171.1836497	67.89857025	0.007879756	0.936280429	0.56078434	0	192.7496	983.7383	655.7725	0.2963	4.1464	911	2.27344572	0.00525166	29.07352386	0.06715984
15.6960773	×ÔÉí³µÁ¾	Road 1	171.4969236	67.93949432	0.007494665	0.935033441	0.56078434	0	193.0138	983.7363	655.7708	0.303	4.1396	912	2.275452773	0.005256296	29.11129606	0.067247094
15.7127666	×ÔÉí³µÁ¾	Road 1	171.8121699	68.00085297	0.007197151	0.9355129	0.56078434	0	193.4103	983.7324	655.7679	0.3122	4.1286	913	2.988473963	0.006903375	29.1611716	0.067362306
15.72941118	×ÔÉí³µÁ¾	Road 1	172.1267609	68.04181137	0.006960884	0.936567664	0.56078434	0	193.6748	983.7305	655.766	0.3179	4.1218	914	2.27574694	0.005256975	29.19905046	0.067449807
15.74612761	×ÔÉí³µÁ¾	Road 1	172.4429952	68.10328674	0.006746177	0.939532518	0.56078434	0	194.0719	983.7266	655.7629	0.3281	4.1097	915	2.993121768	0.006914111	29.24908476	0.067565386
15.76282754	×ÔÉí³µÁ¾	Road 1	172.7591084	68.14443054	0.006587272	0.941093802	0.56078434	0	194.3368	983.7246	655.7607	0.3349	4.103	916	2.28045954	0.005267862	29.28716828	0.067653359
15.77951574	×ÔÉí³µÁ¾	Road 1	173.0751904	68.18561554	0.006456244	0.941800237	0.56078434	0	194.6019	983.7227	655.7585	0.3406	4.0962	917	2.284130701	0.005276342	29.32528631	0.067741411
15.79609361	×ÔÉí³µÁ¾	Road 1	173.3894813	68.25045547	0.006311318	0.94505161	0.56078434	0	195.0188	983.7188	655.7549	0.3511	4.0847	918	3.136660657	0.007245686	29.37728546	0.067861529
15.81277705	×ÔÉí³µÁ¾	Road 1	173.7059654	68.29185333	0.006168578	0.946402311	0.56078434	0	195.2843	983.7158	655.7525	0.3579	4.077	919	2.295164058	0.005301829	29.41557668	0.067949982
15.82945315	×ÔÉí³µÁ¾	Road 1	174.0225028	68.33338852	0.005988671	0.949255347	0.552941203	0	195.55	983.7139	655.75	0.3647	4.0702	920	2.301881942	0.005317347	29.45396311	0.068038655
15.84609554	×ÔÉí³µÁ¾	Road 1	174.3386331	68.38377457	0.005785699	0.947803855	0.552941203	0	195.8728	983.71	655.7469	0.3735	4.0595	921	2.620422871	0.006053177	29.49757319	0.068139394
15.86288051	×ÔÉí³µÁ¾	Road 1	174.6577619	68.44596405	0.005598906	0.946890771	0.552941203	0	196.2719	983.7061	655.7429	0.3837	4.0483	922	3.022941116	0.006982994	29.54831317	0.068256603
15.88111411	×ÔÉí³µÁ¾	Road 1	175.0046127	68.48142242	0.005419001	0.947917223	0.552941203	0	196.5001	983.7041	655.7405	0.3898	4.0422	923	1.983220852	0.00458124	29.58447443	0.068340136
15.89656702	×ÔÉí³µÁ¾	Road 1	175.2987708	68.52880096	0.005220918	0.947589159	0.545098066	0	196.8045	983.7012	655.7373	0.3973	4.0338	924	2.64813066	0.006117182	29.62539575	0.068434664
15.91273471	×ÔÉí³µÁ¾	Road 1	175.6068142	68.59088058	0.005008937	0.946699202	0.545098066	0	197.2045	983.6973	655.7329	0.4084	4.0226	925	3.108497423	0.007180629	29.67565298	0.068550758
15.92942548	×ÔÉí³µÁ¾	Road 1	175.9250153	68.63218231	0.004815815	0.945253491	0.545098066	0	197.4713	983.6943	655.7299	0.4152	4.0148	926	2.301048826	0.005315423	29.71405925	0.068639477
15.946143	×ÔÉí³µÁ¾	Road 1	176.2440137	68.69404221	0.00461756	0.944638729	0.545098066	0	197.8718	983.6895	655.7252	0.4264	4.0026	927	3.029990321	0.006999278	29.76471319	0.068756487
15.96280701	×ÔÉí³µÁ¾	Road 1	176.5621819	68.735289	0.004412496	0.946048915	0.545098066	0	198.1391	983.6865	655.722	0.4342	3.9939	928	2.304458351	0.005323299	29.80311471	0.068845195
15.97948202	×ÔÉí³µÁ¾	Road 1	176.8807515	68.77661133	0.004206432	0.946800232	0.545098066	0	198.4065	983.6836	655.7187	0.442	3.9861	929	2.307384371	0.005330058	29.84159036	0.068934074
15.99616619	×ÔÉí³µÁ¾	Road 1	177.1997839	68.83869781	0.003967751	0.949021697	0.545098066	0	198.8078	983.6797	655.7136	0.4522	3.9749	930	3.048212601	0.007041371	29.89244725	0.069051553
16.01278181	×ÔÉí³µÁ¾	Road 1	177.5177106	68.88313065	0.003762584	0.951463759	0.53725493	0	199.0948	983.6768	655.7099	0.4603	3.9668	931	2.427134913	0.005606682	29.93277561	0.069144712
16.02944216	×ÔÉí³µÁ¾	Road 1	177.836699	68.92765961	0.003556075	0.950971663	0.53725493	0	199.3819	983.6729	655.7061	0.4685	3.9577	932	2.427670774	0.005607919	29.97322144	0.069238142
16.04620587	×ÔÉí³µÁ¾	Road 1	178.1578734	68.97206497	0.003330649	0.948669791	0.53725493	0	199.6692	983.6699	655.7021	0.4766	3.9496	933	2.414829749	0.005578257	30.01370295	0.069331654
16.06274378	×ÔÉí³µÁ¾	Road 1	178.4750069	69.03412399	0.003118864	0.948714554	0.53725493	0	200.0717	983.665	655.6965	0.4878	3.9375	934	3.074652285	0.007102447	30.06455129	0.069449113
16.07941036	×ÔÉí³µÁ¾	Road 1	178.7947993	69.07553558	0.002875332	0.949053168	0.53725493	0	200.3403	983.6621	655.6927	0.4956	3.9298	935	2.320054346	0.005359326	30.10321865	0.069538435
16.11281938	×ÔÉí³µÁ¾	Road 1	179.436857	69.18513107	0.002669409	0.953709364	0.53725493	0	201.0508	983.6543	655.6823	0.5153	3.9081	936	2.797901023	0.006463151	30.1966938	0.069754363
16.12942438	×ÔÉí³µÁ¾	Road 1	179.7561792	69.22976303	0.002468539	0.9550578	0.529411793	0	201.3392	983.6504	655.6779	0.5243	3.899	937	2.446035501	0.005650342	30.2373102	0.069848187
16.14613494	×ÔÉí³µÁ¾	Road 1	180.0777248	69.27141495	0.002076609	0.954152882	0.521568656	0	201.6085	983.6475	655.6737	0.532	3.8912	938	2.330474038	0.005383395	30.27625373	0.069938146
16.16279822	×ÔÉí³µÁ¾	Road 1	180.398621	69.33065186	0.001915549	0.951067567	0.513725519	0	201.878	983.6445	655.6694	0.5387	3.8834	939	2.968259763	0.00685668	30.32571467	0.070052401
16.17947835	×ÔÉí³µÁ¾	Road 1	180.7200734	69.37763214	0.001771068	0.939243078	0.490196079	0	202.3018	983.6396	655.6626	0.551	3.8708	940	2.527716549	0.005839025	30.36787733	0.070149797
16.19609288	×ÔÉí³µÁ¾	Road 1	181.0404481	69.41812363	0.00162011	0.925745547	0.482352942	0	202.5717	983.6357	655.6581	0.5597	3.8621	941	2.301540559	0.005316559	30.40611633	0.070238129
16.21275359	×ÔÉí³µÁ¾	Road 1	181.3619881	69.47746353	0.00150307	0.903291583	0.466666669	0	202.9769	983.6309	655.6512	0.5711	3.8498	942	2.977972246	0.006879116	30.45573146	0.07035274
16.22945572	×ÔÉí³µÁ¾	Road 1	181.6845192	69.51879272	0.001406697	0.885221064	0.450980395	0	203.2664	983.6279	655.6462	0.5794	3.8417	943	2.326880891	0.005375095	30.49459533	0.070442515
16.24614026	×ÔÉí³µÁ¾	Road 1	182.0068848	69.5564003	0.001321137	0.868789673	0.435294122	0	203.5369	983.625	655.6415	0.5874	3.8338	944	2.195540606	0.005071699	30.53122691	0.070527134
16.26281379	×ÔÉí³µÁ¾	Road 1	182.3292314	69.59815521	0.001264641	1.220499873	0.427450985	0	203.8075	983.6211	655.6367	0.5963	3.825	945	2.347094515	0.005421788	30.57036128	0.070617535
16.29612239	×ÔÉí³µÁ¾	Road 1	182.9763211	69.93760529	0.00123174	2.609553814	0.419607848	0	204.602	983.6113	655.6221	0.6197	3.8009	946	6.988482472	0.016143395	30.80313778	0.071155248
16.31277906	×ÔÉí³µÁ¾	Road 1	183.3003912	70.0411171	0.001223343	1.779420137	0.396078438	0	204.8742	983.6084	655.6169	0.6275	3.793	947	4.603541274	0.01063418	30.87981749	0.071332378
16.3296883	×ÔÉí³µÁ¾	Road 1	183.6296838	70.10685654	0.001234899	1.123367071	0.372549027	0	205.1273	983.6055	655.6121	0.6351	3.7855	948	3.199630232	0.007391146	30.93392079	0.071457357
16.34606529	×ÔÉí³µÁ¾	Road 1	183.9488992	70.17008972	0.001264641	1.198801756	0.356862754	0	205.5364	983.6006	655.6041	0.6473	3.7732	949	3.186113804	0.007359923	30.98609976	0.07157789
16.36286383	×ÔÉí³µÁ¾	Road 1	184.2766284	70.23381729	0.001306859	1.542476654	0.34117648	0	205.8095	983.5967	655.5986	0.6562	3.7644	950	3.147801075	0.00727142	31.03897821	0.07170004
16.37949155	×ÔÉí³µÁ¾	Road 1	184.6013901	70.31283646	0.001358972	1.569741726	0.31764707	0	206.1023	983.5928	655.5928	0.6654	3.7552	951	3.732923738	0.008623054	31.10104822	0.071843421
16.39619991	×ÔÉí³µÁ¾	Road 1	184.9281507	70.40415344	0.001419379	1.088469863	0.309803933	0	206.5128	983.5879	655.5844	0.6767	3.7429	952	4.170717193	0.009634357	31.17073407	0.072004396
16.4128104	×ÔÉí³µÁ¾	Road 1	185.2531854	70.44491959	0.001472052	0.848070681	0.309803933	0	206.7867	983.585	655.5786	0.6846	3.735	953	2.341573202	0.005409034	31.20962875	0.072094242
16.42941576	×ÔÉí³µÁ¾	Road 1	185.5782829	70.4803299	0.001522374	0.853354275	0.309803933	0	207.0608	983.5811	655.5729	0.6935	3.7261	954	2.146714127	0.00495891	31.24527572	0.072176587
16.44611056	×ÔÉí³µÁ¾	Road 1	185.9054252	70.54365921	0.001549185	0.972635329	0.309803933	0	207.4917	983.5762	655.5636	0.7062	3.7134	955	3.160203232	0.007300069	31.29803468	0.07229846
16.46272802	×ÔÉí³µÁ¾	Road 1	186.231239	70.58419189	0.001559012	0.887427211	0.31764707	0	207.7662	983.5723	655.5576	0.7151	3.7036	956	2.336418274	0.005397126	31.33686	0.072388147
16.47948294	×ÔÉí³µÁ¾	Road 1	186.5599723	70.63240128	0.001560243	0.672144592	0.333333343	0	208.1781	983.5674	655.5485	0.7274	3.6912	957	2.605094541	0.006017768	31.38050814	0.072488974
16.49610809	×ÔÉí³µÁ¾	Road 1	186.8862772	70.65784836	0.001560243	0.622187257	0.34117648	0	208.4529	983.5635	655.5422	0.7363	3.6824	958	1.784035714	0.004121122	31.41016801	0.072557488
16.51279666	×ÔÉí³µÁ¾	Road 1	187.2139432	70.68297272	0.001560243	0.645988762	0.34117648	0	208.7278	983.5605	655.536	0.7442	3.6745	959	1.769203126	0.004086859	31.43969348	0.072625692
16.52942181	×ÔÉí³µÁ¾	Road 1	187.5404871	70.70960083	0.001560243	0.668977797	0.349019617	0	209.0028	983.5566	655.5295	0.7531	3.6656	960	1.828516513	0.004223873	31.47009285	0.072695914
16.56287006	×ÔÉí³µÁ¾	Road 1	188.1978599	70.75234451	0.001560243	0.616121471	0.356862754	0	209.4547	983.5508	655.519	0.7661	3.6515	961	1.631422217	0.003768585	31.52466106	0.072821967
16.57934859	×ÔÉí³µÁ¾	Road 1	188.5219601	70.80489349	0.001560243	0.564486325	0.36470589	0	210.1037	983.543	655.5034	0.7857	3.6319	962	2.801271805	0.006470938	31.57082191	0.072928599
16.59609948	×ÔÉí³µÁ¾	Road 1	188.8515194	70.82691422	0.001560243	0.575981081	0.380392164	0	210.3791	983.5391	655.4966	0.7946	3.623	963	1.655397515	0.003823968	31.59855128	0.072992653
16.61274736	×ÔÉí³µÁ¾	Road 1	189.179208	70.86060791	0.001560243	0.577527106	0.380392164	0	210.7925	983.5342	655.4863	0.807	3.6106	964	2.090232244	0.004828436	31.63334922	0.073073037
16.62949714	×ÔÉí³µÁ¾	Road 1	189.5090049	70.88264236	0.001560243	0.56471771	0.380392164	0	211.0681	983.5303	655.4794	0.8159	3.6017	965	1.657019008	0.003827714	31.66110393	0.07313715
16.64605411	×ÔÉí³µÁ¾	Road 1	189.8351039	70.9040451	0.001560243	0.555937529	0.388235301	0	211.3439	983.5264	655.4724	0.8247	3.5928	966	1.643442533	0.003796352	31.68831436	0.073200006
16.6627962	×ÔÉí³µÁ¾	Road 1	190.1649972	70.93596039	0.001560243	0.560335934	0.388235301	0	211.7577	983.5215	655.4617	0.8371	3.5804	967	2.020068612	0.004666358	31.72213452	0.073278131
16.67936124	×ÔÉí³µÁ¾	Road 1	190.4915015	70.95760345	0.001560243	0.565971434	0.388235301	0	212.0337	983.5176	655.4543	0.846	3.5715	968	1.652965394	0.00381835	31.74951596	0.073341382
16.69612165	×ÔÉí³µÁ¾	Road 1	190.8219654	70.98095627	0.001560243	0.566438675	0.388235301	0	212.3294	983.5137	655.4465	0.8543	3.5622	969	1.70662495	0.003942304	31.7781197	0.073407457
16.7127809	×ÔÉí³µÁ¾	Road 1	191.1505853	71.01351013	0.001559012	0.56121695	0.388235301	0	212.7437	983.5088	655.4354	0.8667	3.5498	970	2.051279027	0.004738455	31.81229246	0.073486396
16.72946323	×ÔÉí³µÁ¾	Road 1	191.4797601	71.03497467	0.001539399	0.560923815	0.396078438	0	213.02	983.5049	655.4279	0.8756	3.5409	971	1.642234545	0.003793562	31.83968877	0.073549681
16.74611001	×ÔÉí³µÁ¾	Road 1	191.8083833	71.0674118	0.001505474	0.567858279	0.396078438	0	213.4345	983.499	655.4165	0.889	3.5275	972	2.049202181	0.004733657	31.87380139	0.073628481
16.76277109	×ÔÉí³µÁ¾	Road 1	192.1373396	71.07839127	0.001461415	0.570665598	0.396078438	0	213.5728	983.4971	655.4126	0.8934	3.523	973	1.257589568	0.002905032	31.89475418	0.073676882
16.77937755	×ÔÉí³µÁ¾	Road 1	192.4653922	71.11625977	0.001410148	0.574599743	0.396078438	0	214.0469	983.4912	655.3993	0.9079	3.5086	974	2.254220635	0.00520725	31.93218881	0.073763356
16.79612404	×ÔÉí³µÁ¾	Road 1	192.7963135	71.13832855	0.001337741	0.575042427	0.403921574	0	214.3236	983.4873	655.3914	0.9168	3.4996	975	1.663333734	0.003842301	31.9600438	0.073827701
16.81275579	×ÔÉí³µÁ¾	Road 1	193.1251222	71.17176132	0.001268929	0.579645395	0.403921574	0	214.7388	983.4824	655.3794	0.9293	3.4872	976	2.089656618	0.004827107	31.99479845	0.073907984
16.82938131	×ÔÉí³µÁ¾	Road 1	193.4539189	71.19584885	0.001198381	0.585754931	0.411764711	0	215.0355	983.4775	655.3707	0.9395	3.4769	977	1.745019273	0.004030995	32.02381031	0.073975002
16.84613952	×ÔÉí³µÁ¾	Road 1	193.7854462	71.21870041	0.001118617	0.590800047	0.411764711	0	215.3125	983.4746	655.3625	0.9465	3.469	978	1.693046085	0.003910936	32.05218273	0.074040542
16.86275368	×ÔÉí³µÁ¾	Road 1	194.11423	71.2417511	0.001046243	0.594777107	0.411764711	0	215.5896	983.4707	655.3542	0.9555	3.46	979	1.708151813	0.003945831	32.08056224	0.074106099
16.87935391	×ÔÉí³µÁ¾	Road 1	194.4429222	71.28167267	0.000974358	0.60057497	0.411764711	0	216.0648	983.4639	655.3398	0.9709	3.4446	980	2.335439478	0.005394865	32.11933107	0.074195655
16.89612898	×ÔÉí³µÁ¾	Road 1	194.7751857	71.30511475	0.000892199	0.604759574	0.411764711	0	216.3421	983.4609	655.3314	0.9789	3.4366	981	1.71557704	0.003962983	32.14811	0.074262134
16.91280069	×ÔÉí³µÁ¾	Road 1	195.1055118	71.32886581	0.000822002	0.609303594	0.419607848	0	216.6196	983.457	655.3228	0.9878	3.4277	982	1.73280957	0.00400279	32.17699889	0.074328867
16.92939982	×ÔÉí³µÁ¾	Road 1	195.4345657	71.36483917	0.000753311	0.615923643	0.419607848	0	217.0359	983.4512	655.3098	1.0013	3.4142	983	2.191296972	0.005061896	32.21337251	0.074412891
16.94602571	×ÔÉí³µÁ¾	Road 1	195.7642624	71.38914642	0.000676493	0.620082736	0.419607848	0	217.3136	983.4473	655.301	1.0102	3.4053	984	1.757073938	0.004058841	32.24258543	0.074480372
16.96275716	×ÔÉí³µÁ¾	Road 1	196.0962235	71.42595062	0.000611656	0.624710619	0.419607848	0	217.7303	983.4414	655.2877	1.0236	3.3919	985	2.212975651	0.005111974	32.27961173	0.074565903
16.9793321	×ÔÉí³µÁ¾	Road 1	196.4251931	71.45068359	0.000550485	0.630414188	0.419607848	0	218.0083	983.4385	655.2787	1.0316	3.3839	986	1.776958803	0.004104775	32.30906471	0.074633939
16.99607932	×ÔÉí³µÁ¾	Road 1	196.7576982	71.47566376	0.000490112	0.633722782	0.419607848	0	218.2863	983.4346	655.2697	1.0406	3.3749	987	1.777109127	0.004105122	32.33882634	0.074702689
17.01268394	×ÔÉí³µÁ¾	Road 1	197.0874881	71.50076065	0.000439066	0.636850238	0.419607848	0	218.5644	983.4307	655.2605	1.0486	3.366	988	1.789883544	0.004134631	32.36854669	0.074771343
17.02934502	×ÔÉí³µÁ¾	Road 1	197.4185918	71.54239883	0.000393165	0.643838167	0.427450985	0	219.0215	983.4238	655.2452	1.0637	3.3508	989	2.401121977	0.005546592	32.40855197	0.074863755
17.04694595	×ÔÉí³µÁ¾	Road 1	197.7684984	71.56803818	0.000341555	0.647612572	0.427450985	0	219.2999	983.4209	655.236	1.0717	3.3429	990	1.757434737	0.004059674	32.43948445	0.074935209
17.06266644	×ÔÉí³µÁ¾	Road 1	198.0811346	71.59381485	0.000299974	0.652623832	0.427450985	0	219.5784	983.417	655.2264	1.0807	3.3339	991	1.871151489	0.00432236	32.46889987	0.075003159
17.0793792	×ÔÉí³µÁ¾	Road 1	198.4136952	71.63497238	0.000259297	0.659344077	0.427450985	0	220.0163	983.4111	655.2115	1.0945	3.3201	992	2.381264383	0.005500721	32.50869738	0.075095091
17.09616601	×ÔÉí³µÁ¾	Road 1	198.7478516	71.66124344	0.000227896	0.662706792	0.427450985	0	220.295	983.4072	655.2018	1.1034	3.3111	993	1.826372951	0.004218922	32.53935634	0.075165913
17.11271052	×ÔÉí³µÁ¾	Road 1	199.0773067	71.68770676	0.000198515	0.6664657	0.427450985	0	220.5739	983.4033	655.192	1.1124	3.3021	994	1.848329716	0.004269642	32.56993606	0.075236552
17.12932944	×ÔÉí³µÁ¾	Road 1	199.4084377	71.72977753	0.000172057	0.671725929	0.427450985	0	221.0123	983.3975	655.1766	1.1262	3.2883	995	2.426680714	0.005605632	32.61026488	0.075329712
17.14601361	×ÔÉí³µÁ¾	Road 1	199.7410029	71.7587265	0.000147039	0.675009429	0.427450985	0	221.3114	983.3936	655.1659	1.1356	3.279	996	1.933916442	0.004467347	32.64253067	0.075404246
17.16272857	×ÔÉí³µÁ¾	Road 1	200.0743072	71.7857254	0.000128261	0.678828776	0.427450985	0	221.5907	983.3896	655.1559	1.1445	3.27	997	1.86020066	0.004297064	32.67362385	0.075476071
17.17938158	×ÔÉí³µÁ¾	Road 1	200.4065661	71.82675934	0.000112429	0.683852017	0.435294122	0	222.0098	983.3838	655.1406	1.158	3.2565	998	2.387716303	0.005515625	32.71338652	0.075567923
17.19600967	×ÔÉí³µÁ¾	Road 1	200.7384549	71.85432129	9.70E-05	0.687621117	0.435294122	0	222.2893	983.3799	655.1304	1.167	3.2476	999	1.887949659	0.004361164	32.74477951	0.075640441
17.21272976	×ÔÉí³µÁ¾	Road 1	201.072318	71.88398438	8.48E-05	0.693056941	0.435294122	0	222.5889	983.376	655.1193	1.1763	3.2382	1000	1.960974885	0.004529852	32.77756719	0.07571618
17.22952756	×ÔÉí³µÁ¾	Road 1	201.4079296	71.92619247	7.40E-05	0.697353542	0.435294122	0	223.0086	983.3701	655.1036	1.1898	3.2247	1001	2.420832434	0.005592123	32.81823185	0.075810116
17.24601343	×ÔÉí³µÁ¾	Road 1	201.7374383	71.95446167	6.35E-05	0.70116663	0.435294122	0	223.2885	983.3662	655.093	1.1988	3.2157	1002	1.925719433	0.004448412	32.849979	0.075883451
17.26269796	×ÔÉí³µÁ¾	Road 1	202.0710962	71.99290009	5.61E-05	0.705932558	0.435294122	0	223.5686	983.3623	655.0824	1.2078	3.2067	1003	2.29291799	0.005296641	32.88823527	0.075971823
17.27933118	×ÔÉí³µÁ¾	Road 1	202.4038799	72.0258316	4.98E-05	0.709505856	0.435294122	0	223.9889	983.3564	655.0663	1.2212	3.1932	1004	2.092276846	0.00483316	32.92303657	0.076052214
17.29607693	×ÔÉí³µÁ¾	Road 1	202.7390486	72.05454025	4.48E-05	0.713674068	0.435294122	0	224.2692	983.3525	655.0554	1.2302	3.1833	1005	1.927747436	0.004453097	32.95531815	0.076126785
17.31273801	×ÔÉí³µÁ¾	Road 1	203.0727245	72.09818344	4.14E-05	0.717851639	0.435294122	0	224.6899	983.3467	655.0391	1.2437	3.1698	1006	2.492384649	0.005757409	32.99684396	0.07622271
17.32940788	×ÔÉí³µÁ¾	Road 1	203.4067114	72.12728348	3.80E-05	0.721157074	0.435294122	0	224.9705	983.3428	655.028	1.2526	3.1608	1007	1.948883018	0.00450192	33.02933159	0.076297756
17.34603377	×ÔÉí³µÁ¾	Road 1	203.7399525	72.15663757	3.43E-05	0.724016428	0.435294122	0	225.2513	983.3398	655.0168	1.2606	3.1527	1008	1.961958503	0.004532124	33.0619509	0.076373107
17.36268935	×ÔÉí³µÁ¾	Road 1	204.0739932	72.20081635	3.07E-05	0.728461742	0.435294122	0	225.6726	983.334	654.9999	1.2741	3.1392	1009	2.516097677	0.005812186	33.10385796	0.076469912
17.37935409	×ÔÉí³µÁ¾	Road 1	204.4083553	72.2305481	2.70E-05	0.731297791	0.435294122	0	225.9536	983.3301	654.9886	1.2831	3.1302	1010	1.975232124	0.004562786	33.13677469	0.07654595
17.3960225	×ÔÉí³µÁ¾	Road 1	204.7429981	72.27530365	2.24E-05	0.735302269	0.435294122	0	226.3754	983.3242	654.9714	1.2966	3.1167	1011	2.538709671	0.005864419	33.17909094	0.0766437
17.41268761	×ÔÉí³µÁ¾	Road 1	205.0777133	72.30524826	1.82E-05	0.738161623	0.435294122	0	226.6567	983.3203	654.9598	1.3056	3.1077	1012	1.984918275	0.004585161	33.21216982	0.076720112
17.42933439	×ÔÉí³µÁ¾	Road 1	205.4122	72.33542633	1.41E-05	0.740601242	0.435294122	0	226.9382	983.3164	654.9482	1.3145	3.0987	1013	1.995621266	0.004609885	33.24539049	0.076796852
17.4461036	×ÔÉí³µÁ¾	Road 1	205.7492874	72.36563873	9.56E-06	0.743680179	0.435294122	0	227.2197	983.3125	654.9364	1.3235	3.0896	1014	1.989333984	0.004595362	33.27875005	0.076873913
17.46271263	×ÔÉí³µÁ¾	Road 1	206.083396	72.41791306	6.19E-06	0.746748269	0.435294122	0	227.7027	983.3057	654.9161	1.3391	3.074	1015	2.832254022	0.006542507	33.32579103	0.076982577
17.47940083	×ÔÉí³µÁ¾	Road 1	206.4192289	72.44628525	3.46E-06	0.749691725	0.435294122	0	227.9645	983.3027	654.9049	1.3468	3.0664	1016	1.927681376	0.004452944	33.35796057	0.077056889
17.49606447	×ÔÉí³µÁ¾	Road 1	206.7547197	72.47916183	1.48E-06	0.753391266	0.435294122	0	228.2666	983.2979	654.8921	1.3571	3.056	1017	2.099231672	0.004849225	33.39294141	0.077137695
17.51271052	×ÔÉí³µÁ¾	Road 1	207.0900702	72.52544861	5.08E-07	0.756760299	0.435294122	0	228.6899	983.292	654.8738	1.3706	3.0424	1018	2.60633736	0.006020639	33.43632663	0.077237915
17.52940532	×ÔÉí³µÁ¾	Road 1	207.4264853	72.54321213	9.31E-08	0.75847435	0.435294122	0	228.8512	983.29	654.8668	1.3755	3.0376	1019	1.531192099	0.003537054	33.46188957	0.077296965
17.54601471	×ÔÉí³µÁ¾	Road 1	207.7614461	72.60100708	2.44E-11	0.763133109	0.435294122	0	229.3758	983.2832	654.8438	1.3918	3.0212	1020	3.046997034	0.007038563	33.51249834	0.077413871
17.56276962	×ÔÉí³µÁ¾	Road 1	208.0995078	72.63671951	-6.32E-08	0.766872406	0.435294122	0	229.6988	983.2783	654.8295	1.4025	3.0104	1021	2.202593578	0.005087991	33.54940261	0.07749912
17.57934859	×ÔÉí³µÁ¾	Road 1	208.4341645	72.66822968	-5.63E-07	0.768447757	0.435294122	0	229.9816	983.2744	654.8169	1.4115	3.0014	1022	2.058516401	0.004755173	33.58353069	0.077577956
17.59606978	×ÔÉí³µÁ¾	Road 1	208.7719118	72.71552582	-2.41E-06	0.773298681	0.435294122	0	230.406	983.2686	654.7979	1.425	2.9878	1023	2.642442338	0.006104042	33.62771547	0.077680023
17.61267918	×ÔÉí³µÁ¾	Road 1	209.1075478	72.74737244	-6.15E-06	0.775280654	0.435294122	0	230.6891	983.2646	654.785	1.4341	2.9788	1024	2.070973281	0.004783948	33.66211308	0.077759481
17.62940477	×ÔÉí³µÁ¾	Road 1	209.4456802	72.77930145	-1.29E-05	0.777266026	0.435294122	0	230.9723	983.2607	654.7722	1.4431	2.9697	1025	2.066471507	0.004773549	33.69667604	0.077839322
17.64600903	×ÔÉí³µÁ¾	Road 1	209.7815808	72.82720871	-2.57E-05	0.781701088	0.435294122	0	231.3974	983.2559	654.7527	1.4556	2.9571	1026	2.681722055	0.006194778	33.74120405	0.077942181
17.6626833	×ÔÉí³µÁ¾	Road 1	210.119047	72.85944672	-4.28E-05	0.784094095	0.435294122	0	231.6809	983.252	654.7395	1.4647	2.9481	1027	2.083778465	0.004813528	33.77594954	0.078022443
17.67932862	×ÔÉí³µÁ¾	Road 1	210.4560764	72.89173965	-6.79E-05	0.786732137	0.435294122	0	231.9646	983.248	654.7263	1.4737	2.939	1028	2.088765441	0.004825048	33.8107177	0.078102758
17.69603991	×ÔÉí³µÁ¾	Road 1	210.7946674	72.94033356	-0.000106151	0.79008317	0.435294122	0	232.3903	983.2422	654.7064	1.4873	2.9254	1029	2.699660833	0.006236217	33.85583253	0.078206973
17.71275707	×ÔÉí³µÁ¾	Road 1	211.1335289	72.97301102	-0.000152722	0.793310165	0.435294122	0	232.6743	983.2383	654.6929	1.4963	2.9164	1030	2.100002322	0.004851005	33.8909386	0.078288068
17.72941521	×ÔÉí³µÁ¾	Road 1	211.4714215	73.02215424	-0.000214176	0.795379817	0.435294122	0	233.1006	983.2324	654.6726	1.5099	2.9028	1031	2.729001976	0.006303995	33.93639871	0.078393081
17.76277219	×ÔÉí³µÁ¾	Road 1	212.1486606	73.08997421	-0.00030617	0.799352288	0.435294122	0	233.649	983.2246	654.6462	1.5276	2.885	1032	2.152108748	0.004971371	34.00818655	0.078558911
17.77934346	×ÔÉí³µÁ¾	Road 1	212.4853111	73.13511429	-0.000410109	0.804631829	0.435294122	0	234.0759	983.2188	654.6255	1.5412	2.8714	1033	2.589949639	0.005982784	34.05110531	0.078658053
17.79600967	×ÔÉí³µÁ¾	Road 1	212.8240449	73.16851273	-0.000709469	0.807819486	0.435294122	0	234.3607	983.2148	654.6115	1.5503	2.8623	1034	2.135945031	0.004934033	34.08670341	0.078740285
17.81278878	×ÔÉí³µÁ¾	Road 1	213.1653072	73.21869278	-0.000896448	0.810917377	0.435294122	0	234.7881	983.209	654.5904	1.5639	2.8487	1035	2.76116191	0.006378284	34.13303324	0.078847307
17.8294088	×ÔÉí³µÁ¾	Road 1	213.5034887	73.25222168	-0.001132486	0.813120246	0.435294122	0	235.0733	983.2051	654.5762	1.573	2.8396	1036	2.146537289	0.004958501	34.16870874	0.078929717
17.84601343	×ÔÉí³µÁ¾	Road 1	213.8415125	73.28592224	-0.001453177	0.816772461	0.435294122	0	235.3585	983.2012	654.562	1.5821	2.8305	1037	2.155115822	0.004978318	34.20449364	0.07901238
17.86273718	×ÔÉí³µÁ¾	Road 1	214.1822083	73.33908234	-0.001798008	0.820072412	0.435294122	0	235.807	983.1953	654.5393	1.5961	2.8165	1038	2.884338472	0.006662822	34.25273061	0.079123808
17.87938983	×ÔÉí³µÁ¾	Road 1	214.5216126	73.37306442	-0.002185763	0.822677612	0.435294122	0	236.0926	983.1914	654.5249	1.6052	2.8074	1039	2.164326692	0.004999595	34.28877238	0.079207064
17.89602012	×ÔÉí³µÁ¾	Road 1	214.8607192	73.40724564	-0.00268176	0.824806154	0.435294122	0	236.3784	983.1875	654.5103	1.6143	2.7983	1040	2.174527932	0.00502316	34.3249354	0.079290601
17.91274131	×ÔÉí³µÁ¾	Road 1	215.201838	73.44139938	-0.003169954	0.827594161	0.435294122	0	236.6642	983.1836	654.4956	1.6234	2.7902	1041	2.167267885	0.005006389	34.3611747	0.079374314
17.92931881	×ÔÉí³µÁ¾	Road 1	215.5402969	73.50034103	-0.0037031	0.831436694	0.435294122	0	237.1546	983.1768	654.4703	1.6391	2.7744	1042	3.129188303	0.007228425	34.41304883	0.079494143
17.9461441	×ÔÉí³µÁ¾	Road 1	215.8839775	73.5351265	-0.004336582	0.833495498	0.435294122	0	237.4409	983.1738	654.4556	1.6473	2.7663	1043	2.18547062	0.005048437	34.44982001	0.079579084
17.96276559	×ÔÉí³µÁ¾	Road 1	216.2237259	73.58513489	-0.004884018	0.834881663	0.435294122	0	237.7273	983.1699	654.4409	1.6564	2.7572	1044	2.784947933	0.00643323	34.49610999	0.079686014
17.97937572	×ÔÉí³µÁ¾	Road 1	216.563416	73.62281799	-0.005435966	0.836624563	0.435294122	0	238.1571	983.1641	654.4187	1.67	2.7435	1045	2.315694163	0.005349254	34.53457396	0.079774866
17.9960159	×ÔÉí³µÁ¾	Road 1	216.9038838	73.65807724	-0.005994712	0.837727845	0.435294122	0	238.4439	983.1602	654.4039	1.6791	2.7344	1046	2.221375736	0.005131378	34.57153806	0.079860253
18.01276349	×ÔÉí³µÁ¾	Road 1	217.2467972	73.71144333	-0.006421388	0.838751137	0.443137258	0	238.8742	983.1553	654.3818	1.6918	2.7217	1047	2.902413362	0.006704575	34.62014647	0.079972538
18.02937874	×ÔÉí³µÁ¾	Road 1	217.5871666	73.74725189	-0.006765808	0.840002656	0.443137258	0	239.1613	983.1514	654.3669	1.7019	2.7126	1048	2.246787985	0.00519008	34.65747744	0.080058773
18.0460083	×ÔÉí³µÁ¾	Road 1	217.9279949	73.78322525	-0.007021137	0.841457307	0.443137258	0	239.4485	983.1475	654.3522	1.7111	2.7035	1049	2.252872438	0.005204135	34.6949417	0.080145315
18.06273059	×ÔÉí³µÁ¾	Road 1	218.2709033	73.82183533	-0.00709525	0.84258306	0.443137258	0	239.7565	983.1436	654.3364	1.7206	2.694	1050	2.346784587	0.005421072	34.73418531	0.080235968
18.07939056	×ÔÉí³µÁ¾	Road 1	218.6127243	73.86297913	-0.00709525	0.843468845	0.443137258	0	240.0851	983.1396	654.3194	1.7304	2.6842	1051	2.450463144	0.00566057	34.77500997	0.080330273
18.09614731	×ÔÉí³µÁ¾	Road 1	218.9567711	73.91461487	-0.00709525	0.843303382	0.443137258	0	240.4138	983.1357	654.3025	1.7403	2.6743	1052	2.84256164	0.006566317	34.82264206	0.080440303
18.11266946	×ÔÉí³µÁ¾	Road 1	219.2962023	73.95842972	-0.00709525	0.844140768	0.443137258	0	240.8457	983.1309	654.2803	1.754	2.6616	1053	2.569674424	0.005935948	34.86509861	0.080538378
18.12933677	×ÔÉí³µÁ¾	Road 1	219.638783	73.99456787	-0.007081736	0.844413459	0.443137258	0	241.1337	983.127	654.2654	1.7631	2.6525	1054	2.261653901	0.005224421	34.90279429	0.080625455
18.14599602	×ÔÉí³µÁ¾	Road 1	219.9813771	74.03329468	-0.007081736	0.84424895	0.443137258	0	241.4425	983.124	654.2495	1.7717	2.644	1055	2.362718392	0.005457879	34.9421554	0.080716379
18.16265966	×ÔÉí³µÁ¾	Road 1	220.3242648	74.07718506	-0.007081736	0.844086647	0.443137258	0	241.7926	983.1201	654.2315	1.7829	2.6337	1056	2.561809054	0.005917779	34.98484447	0.080814991
18.17938525	×ÔÉí³µÁ¾	Road 1	220.6686429	74.12361603	-0.007081736	0.845367432	0.443137258	0	242.1636	983.1152	654.2124	1.7945	2.6221	1057	2.654222714	0.006131254	35.02923791	0.08091754
18.1960093	×ÔÉí³µÁ¾	Road 1	221.0111092	74.16234283	-0.007081736	0.844804347	0.443137258	0	242.4729	983.1123	654.1965	1.8041	2.6136	1058	2.369467544	0.00547347	35.06862807	0.081008531
18.21267258	×ÔÉí³µÁ¾	Road 1	221.3546473	74.21932755	-0.007081736	0.844897807	0.443137258	0	242.9269	983.1074	654.1731	1.8172	2.6015	1059	3.06987068	0.007091401	35.11978217	0.081126697
18.22938864	×ÔÉí³µÁ¾	Road 1	221.6994411	74.2553833	-0.007081736	0.844579637	0.443137258	0	243.216	983.1035	654.1582	1.8273	2.5923	1060	2.261350998	0.005223721	35.15758305	0.081214017
18.24603432	×ÔÉí³µÁ¾	Road 1	222.0430343	74.30971069	-0.00709525	0.844086528	0.443137258	0	243.6499	983.0996	654.1359	1.8391	2.5806	1061	2.97312393	0.006867916	35.20707272	0.081328338
18.26267707	×ÔÉí³µÁ¾	Road 1	222.386746	74.3484169	-0.00709525	0.844369829	0.443137258	0	243.96	983.0957	654.1199	1.8496	2.5711	1062	2.372185122	0.005479748	35.2465524	0.081419536
18.27933888	×ÔÉí³µÁ¾	Road 1	222.7310182	74.38447266	-0.00709525	0.844811201	0.443137258	0	244.2495	983.0928	654.105	1.8577	2.5629	1063	2.269274767	0.005242025	35.28436263	0.081506878
18.29607217	×ÔÉí³µÁ¾	Road 1	223.0770192	74.43866272	-0.00709525	0.844254494	0.443137258	0	244.6842	983.0889	654.0826	1.8705	2.5511	1064	2.961500141	0.006841065	35.33391826	0.081621351
18.31274058	×ÔÉí³µÁ¾	Road 1	223.4218464	74.47488327	-0.00709525	0.844187796	0.443137258	0	244.9741	983.0859	654.0677	1.8787	2.5429	1065	2.277477626	0.005260973	35.37188019	0.081709043
18.32937783	×ÔÉí³µÁ¾	Road 1	223.7661962	74.51106949	-0.00709525	0.843387365	0.443137258	0	245.2642	983.083	654.0529	1.8878	2.5348	1066	2.279730271	0.005266177	35.40980863	0.081796658
18.34599748	×ÔÉí³µÁ¾	Road 1	224.1104432	74.56769714	-0.00709525	0.843788207	0.443137258	0	245.7203	983.0781	654.0293	1.9019	2.5226	1067	3.074823621	0.007102843	35.46091114	0.081914705
18.36267102	×ÔÉí³µÁ¾	Road 1	224.4559735	74.60378036	-0.00709525	0.843211412	0.443137258	0	246.0107	983.0752	654.0144	1.9101	2.5144	1068	2.275162034	0.005255624	35.49884615	0.082002335
18.37937389	×ÔÉí³µÁ¾	Road 1	224.8023622	74.65780563	-0.00709525	0.843619049	0.443137258	0	246.4466	983.0713	653.9919	1.9229	2.5026	1069	2.966781148	0.006853264	35.54839989	0.082116804
18.3960291	×ÔÉí³µÁ¾	Road 1	225.147847	74.67602921	-0.007125719	0.843073368	0.443137258	0	246.592	983.0703	653.9844	1.9265	2.499	1070	1.586845886	0.003665614	35.57482914	0.082177855
18.41268358	×ÔÉí³µÁ¾	Road 1	225.4935784	74.73264999	-0.007169883	0.842756331	0.443137258	0	247.0491	983.0664	653.9609	1.9396	2.4868	1071	3.076098273	0.007105787	35.62605996	0.082296199
18.42937544	×ÔÉí³µÁ¾	Road 1	225.8402532	74.76868515	-0.007234758	0.843060553	0.443137258	0	247.3402	983.0635	653.946	1.9478	2.4786	1072	2.276133959	0.005257869	35.66405288	0.082383962
18.44602332	×ÔÉí³µÁ¾	Road 1	226.186276	74.82528534	-0.007341445	0.842143834	0.443137258	0	247.7979	983.0596	653.9224	1.961	2.4665	1073	3.079611873	0.007113903	35.71532189	0.082502394
18.46273242	×ÔÉí³µÁ¾	Road 1	226.5337498	74.86374435	-0.007463153	0.84195751	0.443137258	0	248.1102	983.0566	653.9064	1.9696	2.458	1074	2.371011356	0.005477036	35.75493935	0.08259391
18.4793957	×ÔÉí³µÁ¾	Road 1	226.8804377	74.89982758	-0.007603886	0.842324972	0.443137258	0	248.4017	983.0547	653.8914	1.9778	2.4519	1075	2.283863921	0.005275726	35.792996	0.082681821
18.4959644	×ÔÉí³µÁ¾	Road 1	227.225406	74.95370178	-0.007814679	0.841506541	0.443137258	0	248.8394	983.0508	653.8689	1.9896	2.4402	1076	2.988410644	0.006903229	35.8425101	0.082796198
18.51280362	×ÔÉí³µÁ¾	Road 1	227.5761751	74.9897438	-0.008044027	0.840947926	0.443137258	0	249.1313	983.0488	653.8539	1.9978	2.4328	1077	2.270001793	0.005243704	35.88073516	0.082884498
18.52933384	×ÔÉí³µÁ¾	Road 1	227.9206729	75.02575836	-0.008304071	0.840522587	0.443137258	0	249.4234	983.0459	653.8389	2.006	2.4245	1078	2.295806848	0.005303314	35.91868535	0.082972163
18.54601178	×ÔÉí³µÁ¾	Road 1	228.2685107	75.08219376	-0.008642713	0.84052664	0.443137258	0	249.8827	983.043	653.8152	2.0183	2.413	1079	3.078777548	0.007111976	35.97003301	0.083090776
18.56282021	×ÔÉí³µÁ¾	Road 1	228.6192617	75.12321396	-0.008978568	0.839826524	0.443137258	0	250.2169	983.04	653.7981	2.0282	2.4039	1080	2.468233345	0.005701619	36.01152014	0.083186612
18.57937095	×ÔÉí³µÁ¾	Road 1	228.9648006	75.15917358	-0.009355495	0.839699984	0.443137258	0	250.5095	983.0381	653.783	2.0355	2.3965	1081	2.295447091	0.005302483	36.0495115	0.083274372
18.59599647	×ÔÉí³µÁ¾	Road 1	229.3121609	75.21549911	-0.009797221	0.838763773	0.443137258	0	250.9696	983.0352	653.7593	2.0477	2.3862	1082	3.086352647	0.007129475	36.10082372	0.083392903
18.61266855	×ÔÉí³µÁ¾	Road 1	229.6606596	75.25132141	-0.010183658	0.838586867	0.443137258	0	251.2625	983.0332	653.7443	2.055	2.379	1083	2.282259654	0.00527202	36.13887372	0.083480798
18.62936701	×ÔÉí³µÁ¾	Road 1	230.0098761	75.28711624	-0.010562486	0.838249803	0.443137258	0	251.5556	983.0313	653.7292	2.0632	2.3717	1084	2.279924087	0.005266625	36.17694495	0.083568743
18.64606988	×ÔÉí³µÁ¾	Road 1	230.3594337	75.34081879	-0.010986752	0.837842643	0.443137258	0	251.9955	983.0283	653.7067	2.0753	2.3609	1085	2.978614255	0.006880599	36.22669634	0.083683669
18.6626866	×ÔÉí³µÁ¾	Road 1	230.7073536	75.37657242	-0.011343472	0.837174177	0.443137258	0	252.289	983.0264	653.6915	2.0827	2.3536	1086	2.2875301	0.005284195	36.2647076	0.083771475
18.67930919	×ÔÉí³µÁ¾	Road 1	231.0555614	75.41231918	-0.011674818	0.837269664	0.443137258	0	252.5826	983.0254	653.6764	2.09	2.3473	1087	2.287709108	0.005284608	36.30273524	0.083859318
18.69603551	×ÔÉí³µÁ¾	Road 1	231.4061917	75.46602173	-0.012065455	0.836158335	0.443137258	0	253.0232	983.0225	653.6538	2.1008	2.3364	1088	2.980126963	0.006884093	36.35258181	0.083974464
18.71274351	×ÔÉí³µÁ¾	Road 1	231.7566031	75.50163803	-0.012425377	0.836455882	0.443137258	0	253.3172	983.0215	653.6387	2.1081	2.3311	1089	2.277800366	0.005261719	36.39063929	0.084062377
18.72931881	×ÔÉí³µÁ¾	Road 1	232.1044777	75.55508652	-0.01283751	0.835879803	0.443137258	0	253.7583	983.0186	653.616	2.1199	2.3202	1090	2.992383792	0.006912407	36.44023896	0.084176952
18.74604807	×ÔÉí³µÁ¾	Road 1	232.45575	75.59094315	-0.013330587	0.835857749	0.443137258	0	254.0526	983.0176	653.601	2.1272	2.3139	1091	2.287750831	0.005284704	36.47851133	0.084265361
18.76271427	×ÔÉí³µÁ¾	Road 1	232.8058634	75.62658005	-0.013815037	0.835019946	0.443137258	0	254.347	983.0166	653.5858	2.1334	2.3076	1092	2.285373597	0.005279213	36.51659984	0.084353346
18.77933466	×ÔÉí³µÁ¾	Road 1	233.1552726	75.68252792	-0.014419288	0.834017634	0.443137258	0	254.81	983.0146	653.562	2.1448	2.2973	1093	3.089492253	0.007136727	36.5679484	0.084471961
18.7960335	×ÔÉí³µÁ¾	Road 1	233.5064959	75.71811676	-0.015287705	0.833788097	0.443137258	0	255.1048	983.0137	653.5469	2.1521	2.292	1094	2.283161604	0.005274103	36.60607453	0.084560032
18.81273636	×ÔÉí³µÁ¾	Road 1	233.8579686	75.75357513	-0.016296005	0.833286762	0.443137258	0	255.3997	983.0127	653.5317	2.1594	2.2856	1095	2.278642708	0.005263665	36.64413439	0.08464795
18.82939487	×ÔÉí³µÁ¾	Road 1	234.2087544	75.80682449	-0.017489187	0.832631886	0.443137258	0	255.8423	983.0117	653.509	2.1693	2.2767	1096	2.982983368	0.006890692	36.69382645	0.084762739
18.84762701	×ÔÉí³µÁ¾	Road 1	234.5929209	75.85502701	-0.019044461	0.831044793	0.443137258	0	256.2431	983.0107	653.4884	2.1786	2.2684	1097	2.622556433	0.006058105	36.74164126	0.084873191
18.86262355	×ÔÉí³µÁ¾	Road 1	234.9090585	75.89050598	-0.020613505	0.82951504	0.443137258	0	256.5385	983.0098	653.4732	2.1859	2.2621	1098	2.441498668	0.005639862	36.77825531	0.08495777
18.87938763	×ÔÉí³µÁ¾	Road 1	235.2626205	75.9256279	-0.022586802	0.828670561	0.443137258	0	256.8341	983.0098	653.458	2.1913	2.2578	1099	2.264889401	0.005231895	36.81622409	0.085045478
18.89599116	×ÔÉí³µÁ¾	Road 1	235.6129714	75.96358566	-0.024542738	0.82705301	0.443137258	0	257.151	983.0088	653.4418	2.199	2.2511	1100	2.391238801	0.005523762	36.85592709	0.085137192
18.91271015	×ÔÉí³µÁ¾	Road 1	235.9660149	76.0187233	-0.026854007	0.824659228	0.443137258	0	257.616	983.0088	653.4178	2.2093	2.2426	1101	3.057035484	0.007061752	36.90703764	0.085255257
18.92936463	×ÔÉí³µÁ¾	Road 1	236.3178585	76.05384521	-0.029497882	0.822080731	0.443137258	0	257.9121	983.0088	653.4027	2.2157	2.2373	1102	2.277267775	0.005260489	36.94496435	0.085342868
18.94601104	×ÔÉí³µÁ¾	Road 1	236.6696931	76.08871307	-0.032926694	0.818517625	0.443137258	0	258.2083	983.0098	653.3875	2.2211	2.2339	1103	2.268814979	0.005240963	36.98273198	0.085430111
18.96271904	×ÔÉí³µÁ¾	Road 1	237.023071	76.14082947	-0.036339547	0.814246237	0.443137258	0	258.653	983.0098	653.3646	2.2301	2.2258	1104	2.943992004	0.006800622	37.03192019	0.085543736
18.97932953	×ÔÉí³µÁ¾	Road 1	237.3745458	76.17530594	-0.040055417	0.810244083	0.443137258	0	258.9495	983.0107	653.3495	2.2355	2.2215	1105	2.258532943	0.005217211	37.06943553	0.085630396
18.99599061	×ÔÉí³µÁ¾	Road 1	237.7273279	76.22650223	-0.04465859	0.804313302	0.443137258	0	259.3946	983.0127	653.3267	2.2436	2.2163	1106	2.916397749	0.006736879	37.11802586	0.08574264
19.01274846	×ÔÉí³µÁ¾	Road 1	238.0823174	76.26051865	-0.049035195	0.797808647	0.443137258	0	259.6915	983.0137	653.3115	2.2499	2.2119	1107	2.230614164	0.005152719	37.15540615	0.085828988
19.02932009	×ÔÉí³µÁ¾	Road 1	238.4335173	76.29419174	-0.053649709	0.790172517	0.443137258	0	259.9886	983.0156	653.2963	2.2543	2.2095	1108	2.232848573	0.00515788	37.19240811	0.085914463
19.04603505	×ÔÉí³µÁ¾	Road 1	238.7879086	76.32734985	-0.05912669	0.781170428	0.443137258	0	260.2857	983.0176	653.281	2.2597	2.2061	1109	2.201884734	0.005086354	37.22921252	0.085999481
19.06272142	×ÔÉí³µÁ¾	Road 1	239.1419437	76.38129272	-0.064197958	0.771333873	0.443137258	0	260.7742	983.0215	653.256	2.2676	2.2018	1110	3.027214245	0.006992865	37.27972574	0.086116166
19.07931139	×ÔÉí³µÁ¾	Road 1	239.4940822	76.4135788	-0.069644161	0.761602223	0.443137258	0	261.0717	983.0244	653.2407	2.272	2.199	1111	2.17920481	0.005033963	37.31587867	0.08619968
19.09615867	×ÔÉí³µÁ¾	Road 1	239.8519061	76.46132126	-0.076061867	0.748282969	0.443137258	0	261.5181	983.0293	653.218	2.2782	2.1966	1112	2.766648303	0.006390958	37.36248919	0.08630735
19.11270978	×ÔÉí³µÁ¾	Road 1	240.203582	76.4923439	-0.081736244	0.734173775	0.443137258	0	261.8159	983.0332	653.2028	2.2816	2.1951	1113	2.133721643	0.004928897	37.39780465	0.086388929
19.1293683	×ÔÉí³µÁ¾	Road 1	240.5576813	76.52290649	-0.08700116	0.721731663	0.443137258	0	262.1138	983.0381	653.1875	2.2851	2.1955	1114	2.108208731	0.004869962	37.43292427	0.086470055
19.14598465	×ÔÉí³µÁ¾	Road 1	240.9111036	76.57033997	-0.092094801	0.710599363	0.443137258	0	262.5822	983.0459	653.1636	2.2896	2.1958	1115	2.783921732	0.006430859	37.4791829	0.086576913
19.16272564	×ÔÉí³µÁ¾	Road 1	241.2673152	76.60014725	-0.095745511	0.699505627	0.443137258	0	262.8804	983.0508	653.1483	2.2931	2.1963	1116	2.074197165	0.004791395	37.51390701	0.086657125
19.17932513	×ÔÉí³µÁ¾	Road 1	241.6206619	76.63173981	-0.098258138	0.692687988	0.443137258	0	263.2	983.0576	653.1321	2.2959	2.1983	1117	2.156174253	0.004980763	37.54969841	0.086739803
19.19596092	×ÔÉí³µÁ¾	Road 1	241.9749278	76.66348343	-0.099432491	0.688993931	0.443137258	0	263.5198	983.0645	653.1158	2.2988	2.2003	1118	2.160206838	0.004990078	37.58563515	0.086822817
19.21267075	×ÔÉí³µÁ¾	Road 1	242.3309861	76.70992813	-0.099491447	0.687989235	0.443137258	0	263.989	983.0762	653.0919	2.3014	2.2045	1119	2.738665276	0.006326317	37.63139778	0.086928529
19.229308	×ÔÉí³µÁ¾	Road 1	242.6856358	76.73979034	-0.099138029	0.68993032	0.443137258	0	264.2876	983.085	653.0767	2.3019	2.2089	1120	2.086981753	0.004820928	37.66611941	0.087008736
19.2463162	×ÔÉí³µÁ¾	Road 1	243.0483961	76.78275375	-0.09880501	0.691671193	0.443137258	0	264.7145	983.0967	653.0549	2.3037	2.2148	1121	2.572895961	0.00594339	37.70987976	0.087109822
19.26264335	×ÔÉí³µÁ¾	Road 1	243.3967679	76.81309662	-0.098336138	0.693213582	0.443137258	0	265.0135	983.1064	653.0397	2.3042	2.2201	1122	2.130849183	0.004922262	37.74467044	0.087190189
19.28033555	×ÔÉí³µÁ¾	Road 1	243.774416	76.84365921	-0.097286604	0.695959747	0.443137258	0	265.3125	983.1162	653.0245	2.3047	2.2254	1123	2.044619096	0.00472307	37.78084425	0.08727375
19.29633132	×ÔÉí³µÁ¾	Road 1	244.1160595	76.89006958	-0.095783845	0.70099324	0.443137258	0	265.7613	983.1318	653.0017	2.2995	2.2299	1124	2.825389553	0.00652665	37.82603855	0.087378149
19.31269402	×ÔÉí³µÁ¾	Road 1	244.465682	76.92134628	-0.093445666	0.706674516	0.443137258	0	266.0606	983.1426	652.9865	2.2932	2.2294	1125	2.168668676	0.005009625	37.86152382	0.08746012
19.32932981	×ÔÉí³µÁ¾	Road 1	244.8212854	76.95293198	-0.090720043	0.713650167	0.443137258	0	266.36	983.1543	652.9713	2.2859	2.2308	1126	2.160920486	0.004991726	37.89747243	0.087543161
19.34595753	×ÔÉí³µÁ¾	Road 1	245.176939	77.00112076	-0.087271079	0.72161597	0.443137258	0	266.8094	983.1719	652.9486	2.2745	2.2324	1127	2.826810437	0.006529932	37.94447584	0.087651739
19.36262337	×ÔÉí³µÁ¾	Road 1	245.5335698	77.03605728	-0.083315447	0.729996204	0.443137258	0	267.1304	983.1855	652.9323	2.2647	2.2343	1128	2.294448171	0.005300175	37.98271475	0.087740071
19.37926099	×ÔÉí³µÁ¾	Road 1	245.889749	77.06903687	-0.078957677	0.739332557	0.450980395	0	267.4302	983.1982	652.9171	2.2564	2.2357	1129	2.219365463	0.005126734	38.01963971	0.087825368
19.39603679	×ÔÉí³µÁ¾	Road 1	246.2491211	77.11936111	-0.073639125	0.752004921	0.450980395	0	267.8801	983.2188	652.894	2.2421	2.2393	1130	2.898429571	0.006695372	38.06826321	0.087937688
19.41267624	×ÔÉí³µÁ¾	Road 1	246.6057518	77.15823212	-0.068687715	0.763098657	0.450980395	0	268.2231	983.2354	652.8769	2.2297	2.2438	1131	2.457420915	0.005676642	38.10915334	0.088032144
19.42931056	×ÔÉí³µÁ¾	Road 1	246.9624308	77.19247513	-0.063700169	0.773148358	0.450980395	0	268.5232	983.25	652.8618	2.2195	2.2471	1132	2.273348175	0.005251434	38.14696894	0.088119498
19.44597237	×ÔÉí³µÁ¾	Road 1	247.3199419	77.24490738	-0.057994582	0.783005476	0.450980395	0	268.9737	983.2725	652.839	2.2033	2.2536	1133	3.000757427	0.00693175	38.19696699	0.088234994
19.46265324	×ÔÉí³µÁ¾	Road 1	247.6780243	77.27995377	-0.052820522	0.790105224	0.450980395	0	269.2742	983.2881	652.8237	2.1921	2.2579	1134	2.303899134	0.005322007	38.23539803	0.088323769
19.47927803	×ÔÉí³µÁ¾	Road 1	248.035066	77.31526108	-0.047662217	0.798012316	0.450980395	0	269.5748	983.3037	652.8086	2.1799	2.2631	1135	2.320031293	0.005359272	38.27396806	0.088412866
19.49596807	×ÔÉí³µÁ¾	Road 1	248.393755	77.36835938	-0.042115483	0.805435777	0.450980395	0	270.0259	983.3281	652.7858	2.1627	2.2715	1136	3.02818204	0.006995101	38.32450852	0.088529615
19.51278859	×ÔÉí³µÁ¾	Road 1	248.7554156	77.40411301	-0.037537739	0.80974108	0.450980395	0	270.3268	983.3447	652.7706	2.1496	2.2778	1137	2.323566039	0.005367438	38.36359213	0.088619898
19.52933164	×ÔÉí³µÁ¾	Road 1	249.1112848	77.44216003	-0.03310572	0.814209223	0.450980395	0	270.6494	983.3623	652.7543	2.1369	2.2846	1138	2.441152257	0.005639062	38.40397622	0.088713185
19.54600665	×ÔÉí³µÁ¾	Road 1	249.4702405	77.49565659	-0.02848701	0.818136156	0.450980395	0	271.1011	983.3887	652.7314	2.1177	2.2959	1139	3.050575708	0.00704683	38.45484459	0.088830691
19.59603826	×ÔÉí³µÁ¾	Road 1	250.5486254	77.59465027	-0.024845524	0.81958884	0.450980395	0	271.8332	983.4307	652.6946	2.086	2.3129	1140	2.229474598	0.005150086	38.56638881	0.089088358
19.61262603	×ÔÉí³µÁ¾	Road 1	250.9064848	77.66529236	-0.021578025	0.82102102	0.450980395	0	272.5443	983.4736	652.6587	2.054	2.3361	1141	3.761115087	0.008688176	38.6287773	0.089232476
19.62926731	×ÔÉí³µÁ¾	Road 1	251.2656631	77.70085373	-0.013064717	0.824668646	0.450980395	0	272.8463	983.4922	652.6434	2.0409	2.3463	1142	2.338940928	0.005402954	38.66770028	0.089322388
19.64603139	×ÔÉí³µÁ¾	Road 1	251.627739	77.75394516	-0.010659747	0.825730026	0.450980395	0	273.2994	983.5205	652.6207	2.0198	2.3615	1143	3.032068333	0.007004078	38.71853011	0.089439805
19.6652459	×ÔÉí³µÁ¾	Road 1	252.0429276	77.78909454	-0.008801765	0.8247931	0.450980395	0	273.6017	983.5391	652.6053	2.0058	2.3726	1144	2.134508017	0.004930714	38.75954363	0.089534546
19.67998182	×ÔÉí³µÁ¾	Road 1	252.3614973	77.82686005	-0.007248465	0.824669898	0.450980395	0	273.9257	983.5596	652.5891	1.9901	2.3843	1145	2.628596868	0.006072059	38.79827843	0.089624023
19.69601389	×ÔÉí³µÁ¾	Road 1	252.7083227	77.87964935	-0.005688874	0.825539112	0.450980395	0	274.3795	983.5879	652.5662	1.97	2.4005	1146	3.121100508	0.007209742	38.84831612	0.08973961
19.71264014	×ÔÉí³µÁ¾	Road 1	253.0681647	77.91479874	-0.004756014	0.826080322	0.450980395	0	274.6822	983.6074	652.551	1.955	2.4126	1147	2.329178997	0.005380403	38.88704164	0.089829066
19.72933714	×ÔÉí³µÁ¾	Road 1	253.4297128	77.95250931	-0.003818226	0.825455427	0.450980395	0	275.0067	983.6279	652.5345	1.9404	2.4263	1148	2.427414736	0.005607328	38.92757219	0.089922692
19.74597329	×ÔÉí³µÁ¾	Road 1	253.7901052	77.98756256	-0.002965112	0.824236751	0.450980395	0	275.3097	983.6475	652.5193	1.9254	2.4383	1149	2.326334176	0.005373832	38.96627343	0.090012092
19.76269925	×ÔÉí³µÁ¾	Road 1	254.1526987	78.042556	-0.002321073	0.824431121	0.450980395	0	275.786	983.6777	652.4953	1.9038	2.458	1150	3.123720322	0.007215794	39.01852064	0.090132783
19.77933576	×ÔÉí³µÁ¾	Road 1	254.513515	78.07755432	-0.001776435	0.824761868	0.450980395	0	276.0894	983.6973	652.4801	1.8888	2.47	1151	2.326414544	0.005374018	39.05722408	0.090222188
19.79595432	×ÔÉí³µÁ¾	Road 1	254.8741036	78.11262131	-0.001268929	0.824094176	0.450980395	0	276.3928	983.7178	652.4648	1.8738	2.484	1152	2.331647214	0.005386105	39.09597269	0.090311697
19.81262639	×ÔÉí³µÁ¾	Road 1	255.2361074	78.16747055	-0.000929184	0.824629128	0.450980395	0	276.8699	983.749	652.4408	1.8512	2.5056	1153	3.129578643	0.007229327	39.14814926	0.090432225
19.82930067	×ÔÉí³µÁ¾	Road 1	255.5983212	78.20248947	-0.000666663	0.823446631	0.450980395	0	277.1737	983.7686	652.4255	1.8372	2.5187	1154	2.327273652	0.005376002	39.18695485	0.090521866
19.84600023	×ÔÉí³µÁ¾	Road 1	255.9613274	78.25487366	-0.000443843	0.823521078	0.450980395	0	277.6296	983.7988	652.4025	1.8152	2.5397	1155	3.029323787	0.006997738	39.23754324	0.090638725
19.86263968	×ÔÉí³µÁ¾	Road 1	256.3231881	78.28975525	-0.000301206	0.823560715	0.450980395	0	277.9338	983.8184	652.3872	1.8002	2.5537	1156	2.326927821	0.005375203	39.27626204	0.090728165
19.87930552	×ÔÉí³µÁ¾	Road 1	256.6857843	78.32465057	-0.000203225	0.823036075	0.450980395	0	278.238	983.8389	652.3718	1.7852	2.5677	1157	2.326142356	0.005373389	39.31502916	0.090817717
19.89602378	×ÔÉí³µÁ¾	Road 1	257.0497643	78.37706223	-0.000128494	0.822601914	0.450980395	0	278.6946	983.8691	652.3489	1.7632	2.5896	1158	3.032323489	0.007004667	39.36572433	0.090934823
19.91264894	×ÔÉí³µÁ¾	Road 1	257.4118779	78.41183395	-8.20E-05	0.822705328	0.450980395	0	278.9992	983.8887	652.3336	1.7492	2.6026	1159	2.326834179	0.005374987	39.40440831	0.091024183
19.92934044	×ÔÉí³µÁ¾	Road 1	257.7755982	78.44670181	-4.64E-05	0.822563767	0.450980395	0	279.304	983.9092	652.3182	1.7343	2.6176	1160	2.326003494	0.005373068	39.4432328	0.091113868
19.9467185	×ÔÉí³µÁ¾	Road 1	258.1545318	78.49903107	-1.91E-05	0.821267784	0.450980395	0	279.7613	983.9395	652.2952	1.7123	2.6396	1161	2.952642246	0.006820604	39.49454399	0.091232397
19.96269008	×ÔÉí³µÁ¾	Road 1	258.5029618	78.53624039	-4.92E-06	0.821368814	0.450980395	0	280.0882	983.9609	652.2787	1.6968	2.6551	1162	2.491663038	0.005755742	39.5343398	0.091324325
19.97933173	×ÔÉí³µÁ¾	Road 1	258.8661711	78.57113571	-5.56E-07	0.82099092	0.450980395	0	280.3933	983.9814	652.2634	1.6818	2.6701	1163	2.334585922	0.005392893	39.57319116	0.091414072
19.99595249	×ÔÉí³µÁ¾	Road 1	259.2291652	78.62332077	3.24E-10	0.821170688	0.450980395	0	280.8514	984.0117	652.2404	1.6599	2.692	1164	3.044145464	0.007031976	39.62378716	0.091530948
20.01266818	×ÔÉí³µÁ¾	Road 1	259.5944059	78.66058502	6.27E-07	0.82143575	0.450980395	0	281.1788	984.0342	652.2239	1.6433	2.7085	1165	2.426883677	0.005606101	39.6643542	0.091624658
20.02932339	×ÔÉí³µÁ¾	Road 1	259.9584863	78.69546661	4.82E-06	0.820240259	0.450980395	0	281.4845	984.0547	652.2085	1.6284	2.7235	1166	2.336084448	0.005396355	39.70326218	0.091714536
20.04595404	×ÔÉí³µÁ¾	Road 1	260.3222706	78.74756241	1.33E-05	0.819568157	0.450980395	0	281.9432	984.085	652.1853	1.6064	2.7454	1167	3.043561464	0.007030627	39.7538786	0.09183146
20.06262429	×ÔÉí³µÁ¾	Road 1	260.6870807	78.78208694	2.67E-05	0.819888532	0.450980395	0	282.2493	984.1055	652.17	1.5914	2.7604	1168	2.32246455	0.005364893	39.79259464	0.091920894
20.07941696	×ÔÉí³µÁ¾	Road 1	261.054732	78.81680374	4.51E-05	0.820132315	0.450980395	0	282.5554	984.126	652.1545	1.5764	2.7753	1169	2.320868555	0.005361206	39.83156822	0.092010923
20.09593141	×ÔÉí³µÁ¾	Road 1	261.4165429	78.87148132	6.79E-05	0.819667935	0.450980395	0	283.0368	984.1582	652.1304	1.5529	2.7988	1170	3.169384772	0.007321279	39.88390888	0.09213183
20.11267899	×ÔÉí³µÁ¾	Road 1	261.7836343	78.90863571	8.57E-05	0.819081366	0.450980395	0	283.3652	984.1797	652.1138	1.5374	2.8143	1171	2.426226415	0.005604583	39.92454231	0.092225693
20.12928069	×ÔÉí³µÁ¾	Road 1	262.1476993	78.9457901	9.56E-05	0.819332004	0.450980395	0	283.6937	984.2021	652.0973	1.5208	2.8308	1172	2.44052519	0.005637613	39.96505916	0.092319287
20.14686292	×ÔÉí³µÁ¾	Road 1	262.533545	79.00273361	9.93E-05	0.81823504	0.443137258	0	284.1978	984.2354	652.0719	1.4967	2.8548	1173	3.124855321	0.007218416	40.0200011	0.092446203
20.19605769	×ÔÉí³µÁ¾	Road 1	263.6142797	79.0865593	0.000100309	0.813603401	0.443137258	0	284.9436	984.2852	652.0344	1.4604	2.8911	1174	2.079092734	0.004802704	40.12228158	0.09268247
20.21265279	×ÔÉí³µÁ¾	Road 1	263.9791765	79.15763397	0.000100705	0.812664568	0.443137258	0	285.5804	984.3281	652.0023	1.429	2.9225	1175	3.844175121	0.008880045	40.18607604	0.092829836
20.22925961	×ÔÉí³µÁ¾	Road 1	264.3445012	79.1944725	0.000100705	0.810992122	0.443137258	0	285.91	984.3496	651.9857	1.4134	2.938	1176	2.433784919	0.005622043	40.22649348	0.0929232
20.24598007	×ÔÉí³µÁ¾	Road 1	264.7124847	79.22872925	9.87E-05	0.810821414	0.443137258	0	286.2177	984.3701	651.9702	1.3985	2.9529	1177	2.318713242	0.005356228	40.26526343	0.093012759
20.26266827	×ÔÉí³µÁ¾	Road 1	265.0799278	79.26529312	9.76E-05	0.809630215	0.443137258	0	286.5476	984.3926	651.9536	1.382	2.9694	1178	2.417016696	0.005583309	40.30559909	0.093105934
20.279285	×ÔÉí³µÁ¾	Road 1	265.4460565	79.32150192	9.74E-05	0.808698475	0.443137258	0	287.0538	984.4258	651.9281	1.3579	2.9934	1179	3.234921259	0.007472668	40.35935288	0.093230105
20.29589402	×ÔÉí³µÁ¾	Road 1	265.8121731	79.35562134	9.74E-05	0.80771786	0.443137258	0	287.362	984.4463	651.9126	1.343	3.0083	1180	2.325703626	0.005372375	40.39798056	0.093319335
20.31266543	×ÔÉí³µÁ¾	Road 1	266.1821074	79.4067627	9.74E-05	0.807887971	0.443137258	0	287.8246	984.4775	651.8893	1.3201	3.0311	1181	3.0094715	0.006951879	40.44845364	0.093435928
20.32925943	×ÔÉí³µÁ¾	Road 1	266.5482858	79.44092331	9.74E-05	0.806656659	0.443137258	0	288.1332	984.498	651.8738	1.3052	3.046	1182	2.330862199	0.005384292	40.48713196	0.093525275
20.34600188	×ÔÉí³µÁ¾	Road 1	266.917898	79.47485046	0.000101301	0.806316495	0.443137258	0	288.4419	984.5186	651.8583	1.2903	3.0609	1183	2.309622322	0.005335228	40.5258007	0.0936146
20.36263657	×ÔÉí³µÁ¾	Road 1	267.285378	79.52827835	0.000107181	0.806046128	0.443137258	0	288.9273	984.5508	651.8339	1.2668	3.0843	1184	3.125247317	0.007219321	40.5777882	0.093734691
20.37925915	×ÔÉí³µÁ¾	Road 1	267.6527476	79.56225357	0.000116312	0.805495024	0.443137258	0	289.2364	984.5713	651.8182	1.2519	3.0992	1185	2.323864959	0.005368128	40.61641685	0.093823923
20.39592939	×ÔÉí³µÁ¾	Road 1	268.0213275	79.59620819	0.000129663	0.805316329	0.443137258	0	289.5455	984.5928	651.8027	1.236	3.1151	1186	2.319861095	0.005358879	40.65508949	0.093913257
20.41267038	×ÔÉí³µÁ¾	Road 1	268.3917084	79.64711609	0.000142246	0.804243386	0.443137258	0	290.0096	984.623	651.7793	1.2141	3.1369	1187	3.011895313	0.006957478	40.70551159	0.094029732
20.42927391	×ÔÉí³µÁ¾	Road 1	268.7592046	79.68102264	0.000157479	0.804495871	0.443137258	0	290.3191	984.6436	651.7638	1.1992	3.1518	1188	2.325655478	0.005372264	40.74412568	0.09411893
20.44595698	×ÔÉí³µÁ¾	Road 1	269.1286412	79.71985931	0.000176053	0.804099739	0.443137258	0	290.6729	984.668	651.746	1.1812	3.1698	1189	2.523435511	0.005829136	40.78622433	0.094216178
20.46265251	×ÔÉí³µÁ¾	Road 1	269.4985891	79.77057495	0.000196342	0.804491997	0.450980395	0	291.1377	984.6982	651.7225	1.1593	3.1916	1190	3.013871765	0.006962044	40.83654252	0.094332413
20.47929306	×ÔÉí³µÁ¾	Road 1	269.8674758	79.80457764	0.000222138	0.804962397	0.450980395	0	291.4477	984.7197	651.707	1.1435	3.2074	1191	2.329646649	0.005381484	40.87530912	0.094421964
20.49723525	×ÔÉí³µÁ¾	Road 1	270.2654707	79.85545807	0.000269097	0.807902098	0.450980395	0	291.9129	984.75	651.6835	1.1217	3.2293	1192	2.877484145	0.006646988	40.92693749	0.094541226
20.51267569	×ÔÉí³µÁ¾	Road 1	270.6081179	79.88952942	0.000331808	0.808195293	0.450980395	0	292.2232	984.7715	651.668	1.1059	3.2451	1193	2.444502937	0.005646802	40.9646817	0.094628415
20.52926859	×ÔÉí³µÁ¾	Road 1	270.9764972	79.92369003	0.000421328	0.807820082	0.450980395	0	292.5337	984.792	651.6523	1.091	3.26	1194	2.343299916	0.005413023	41.00356384	0.094718232
20.54594983	×ÔÉí³µÁ¾	Road 1	271.3469953	79.95768585	0.000512059	0.808300436	0.450980395	0	292.8443	984.8125	651.6367	1.0762	3.2748	1195	2.329813676	0.00538187	41.04242801	0.094808009
20.56268128	×ÔÉí³µÁ¾	Road 1	271.7188577	80.01123734	0.000618941	0.808489799	0.450980395	0	293.3326	984.8447	651.6121	1.0529	3.2982	1196	3.134672837	0.007241094	41.09487565	0.094929163
20.57930497	×ÔÉí³µÁ¾	Road 1	272.088482	80.04528122	0.000747264	0.809820354	0.450980395	0	293.6436	984.8662	651.5964	1.037	3.314	1197	2.338916361	0.005402897	41.13375707	0.095018979
20.59596715	×ÔÉí³µÁ¾	Road 1	272.459132	80.08195496	0.000932676	0.809439421	0.450980395	0	293.9768	984.8877	651.5797	1.0216	3.3294	1198	2.445760635	0.005649707	41.17450876	0.095113115
20.61360217	×ÔÉí³µÁ¾	Road 1	272.851674	80.13326111	0.001148476	0.809372008	0.450980395	0	294.4437	984.9189	651.5562	0.9989	3.3522	1199	2.937355613	0.006785291	41.22630908	0.095232774
20.62933549	×ÔÉí³µÁ¾	Road 1	273.2020349	80.16738739	0.001413605	0.809230268	0.450980395	0	294.7551	984.9395	651.5405	0.9841	3.3671	1200	2.425928418	0.005603895	41.26447699	0.095320942
20.64601746	×ÔÉí³µÁ¾	Road 1	273.5737579	80.21850128	0.001760368	0.809461892	0.450980395	0	295.2224	984.9707	651.517	0.9613	3.3898	1201	3.047365529	0.007039414	41.31531305	0.095438373
20.66267487	×ÔÉí³µÁ¾	Road 1	273.945092	80.25273056	0.002120126	0.809223413	0.450980395	0	295.5342	984.9912	651.5012	0.9465	3.4047	1202	2.34904219	0.005426287	41.35444202	0.095528761
20.67929306	×ÔÉí³µÁ¾	Road 1	274.3157089	80.28678131	0.002544558	0.809694529	0.450980395	0	295.8461	985.0127	651.4856	0.9307	3.4206	1203	2.345825363	0.005418857	41.39342539	0.095618813
20.69597613	×ÔÉí³µÁ¾	Road 1	274.688021	80.34032593	0.003109102	0.809078395	0.450980395	0	296.1581	985.0332	651.4698	0.9074	3.4439	1204	3.152492257	0.007282257	41.44601864	0.095740303
20.71264051	×ÔÉí³µÁ¾	Road 1	275.0600738	80.37445908	0.003720659	0.809403896	0.450980395	0	296.6486	985.0654	651.4452	0.8926	3.4588	1205	2.347549131	0.005422838	41.48513908	0.095830671
20.72962342	×ÔÉí³µÁ¾	Road 1	275.4393998	80.40867462	0.004442118	0.808515429	0.450980395	0	296.961	985.0859	651.4294	0.8778	3.4736	1206	2.325100279	0.005370982	41.52462605	0.095921886
20.74598942	×ÔÉí³µÁ¾	Road 1	275.805179	80.45980911	0.005357097	0.808962405	0.450980395	0	297.4297	985.1172	651.4058	0.8551	3.4964	1207	3.097626431	0.007155517	41.5753218	0.096038993
20.76267065	×ÔÉí³µÁ¾	Road 1	276.1781621	80.49399033	0.006227273	0.80881983	0.450980395	0	297.7424	985.1377	651.3901	0.8402	3.5113	1208	2.351158246	0.005431176	41.61454203	0.096129592
20.77924999	×ÔÉí³µÁ¾	Road 1	276.5490232	80.52794495	0.007166479	0.808250248	0.450980395	0	298.0553	985.1582	651.3744	0.8254	3.5261	1209	2.351279192	0.005431455	41.65352468	0.096219642
20.79599281	×ÔÉí³µÁ¾	Road 1	276.9237112	80.56450882	0.008277818	0.807807088	0.450980395	0	298.3682	985.1797	651.3586	0.8096	3.542	1210	2.446746742	0.005651985	41.69449011	0.096314272
20.81266342	×ÔÉí³µÁ¾	Road 1	277.2970187	80.61535492	0.009314904	0.807449996	0.450980395	0	298.8603	985.2119	651.3339	0.7863	3.5653	1211	3.051230982	0.007048344	41.74535599	0.096431772
20.82928124	×ÔÉí³µÁ¾	Road 1	277.6693015	80.64944	0.010558079	0.806623161	0.450980395	0	299.1736	985.2324	651.3181	0.7715	3.5811	1212	2.356538622	0.005443604	41.78451653	0.096522233
20.84612266	×ÔÉí³µÁ¾	Road 1	278.0468314	80.7002861	0.01167953	0.806191444	0.450980395	0	299.6438	985.2627	651.2943	0.7497	3.6029	1213	3.032562444	0.007005219	41.83558919	0.096640211
20.86262722	×ÔÉí³µÁ¾	Road 1	278.4169766	80.73665771	0.012802404	0.805928409	0.450980395	0	299.9799	985.2842	651.2775	0.7343	3.6183	1214	2.465202241	0.005694617	41.87627626	0.096734198
20.87927583	×ÔÉí³µÁ¾	Road 1	278.790521	80.77307053	0.014080279	0.804933608	0.450980395	0	300.316	985.3057	651.2605	0.7189	3.6347	1215	2.454598041	0.005670121	41.91714192	0.096828598
20.89596147	×ÔÉí³µÁ¾	Road 1	279.1651314	80.82386169	0.015113547	0.80366677	0.443137258	0	300.787	985.3359	651.2368	0.6972	3.6565	1216	3.054132316	0.007055046	41.96810206	0.096946316
20.91267386	×ÔÉí³µÁ¾	Road 1	279.5404994	80.85764465	0.016055916	0.801819026	0.443137258	0	301.1012	985.3564	651.2209	0.6833	3.6713	1217	2.341112858	0.005407971	42.00722766	0.097036696
20.92925906	×ÔÉí³µÁ¾	Road 1	279.9131652	80.89120789	0.017030604	0.799155056	0.443137258	0	301.4154	985.376	651.2051	0.6695	3.6862	1218	2.343537767	0.005413572	42.0460957	0.097126481
20.9459304	×ÔÉí³µÁ¾	Road 1	280.2879995	80.94152527	0.017836912	0.797496855	0.443137258	0	301.8871	985.4063	651.1814	0.6478	3.709	1219	3.040101405	0.007022634	42.09677827	0.097243558
20.96262997	×ÔÉí³µÁ¾	Road 1	280.6636242	80.97509537	0.018571798	0.795445085	0.443137258	0	302.2017	985.4258	651.1655	0.634	3.7229	1220	2.336248586	0.005396734	42.1357926	0.097333681
20.97924193	×ÔÉí³µÁ¾	Road 1	281.0374321	81.00841141	0.019195026	0.794773042	0.443137258	0	302.5165	985.4453	651.1497	0.6202	3.7374	1221	2.333804431	0.005391088	42.17456166	0.097423237
20.99597741	×ÔÉí³µÁ¾	Road 1	281.4142636	81.06087112	0.01974497	0.794070542	0.443137258	0	303.0114	985.4766	651.1247	0.5979	3.7607	1222	3.125659354	0.007220273	42.2268711	0.097544072
21.01259414	×ÔÉí³µÁ¾	Road 1	281.7885742	81.09410477	0.020121887	0.792671382	0.443137258	0	303.3265	985.4961	651.1088	0.5841	3.7755	1223	2.33207948	0.005387104	42.26562262	0.097633588
21.02928014	×ÔÉí³µÁ¾	Road 1	282.1646111	81.12985153	0.020366706	0.792145789	0.443137258	0	303.6643	985.5166	651.0918	0.5707	3.7899	1224	2.432707453	0.005619554	42.30621478	0.097727356
21.04598007	×ÔÉí³µÁ¾	Road 1	282.5411928	81.17961273	0.020503571	0.790807366	0.443137258	0	304.1374	985.5449	651.0679	0.551	3.8117	1225	3.021188789	0.006978946	42.35666843	0.097843904
21.06264005	×ÔÉí³µÁ¾	Road 1	282.9170381	81.2151947	0.020517292	0.791024327	0.443137258	0	304.4756	985.5654	651.0508	0.5366	3.827	1226	2.430360108	0.005614132	42.39715817	0.097937435
21.0792542	×ÔÉí³µÁ¾	Road 1	283.2920031	81.24842148	0.020517292	0.790508747	0.443137258	0	304.7913	985.584	651.0349	0.5238	3.8408	1227	2.335873704	0.005395868	42.43596674	0.098027083
21.09634562	×ÔÉí³µÁ¾	Road 1	283.6779762	81.29830627	0.020496713	0.788800001	0.443137258	0	305.2652	985.6123	651.011	0.505	3.8615	1228	2.982308894	0.006889134	42.48693862	0.098144828
21.11263647	×ÔÉí³µÁ¾	Road 1	284.0460307	81.33373718	0.020448752	0.789352894	0.443137258	0	305.6038	985.6328	650.994	0.4907	3.8769	1229	2.460962381	0.005684823	42.5270298	0.098237439
21.12927006	×ÔÉí³µÁ¾	Road 1	284.4219811	81.36680603	0.020394031	0.789094031	0.443137258	0	305.92	985.6514	650.978	0.4779	3.8907	1230	2.330524819	0.005383512	42.56579478	0.098326986
21.14596119	×ÔÉí³µÁ¾	Road 1	284.7994738	81.41888809	0.020325767	0.788844943	0.443137258	0	306.4172	985.6797	650.9529	0.4596	3.912	1231	3.128091508	0.007225891	42.61800618	0.098447594
21.16258415	×ÔÉí³µÁ¾	Road 1	285.1755876	81.45420227	0.020244051	0.789211035	0.443137258	0	306.7564	985.6992	650.9358	0.4462	3.9263	1232	2.428643023	0.005610165	42.6583774	0.098540852
21.17924266	×ÔÉí³µÁ¾	Road 1	285.5526596	81.48743591	0.020088039	0.788009703	0.443137258	0	307.0732	985.7178	650.9198	0.4334	3.9411	1233	2.338404784	0.005401715	42.69733174	0.098630836
21.19694585	×ÔÉí³µÁ¾	Road 1	285.9536222	81.53699112	0.019912649	0.788498163	0.443137258	0	307.5485	985.7451	650.8959	0.4157	3.9618	1234	2.906024093	0.006712916	42.74877766	0.098749676
21.21260953	×ÔÉí³µÁ¾	Road 1	286.3085461	81.57255249	0.019704867	0.787944138	0.443137258	0	307.8882	985.7637	650.8787	0.4033	3.9752	1235	2.534553322	0.005854818	42.78847808	0.098841384
21.22929224	×ÔÉí³µÁ¾	Road 1	286.6867131	81.60553894	0.019392606	0.788110912	0.443137258	0	308.2054	985.7822	650.8627	0.3905	3.989	1236	2.328874265	0.0053797	42.82733	0.098931132
21.24591299	×ÔÉí³µÁ¾	Road 1	287.0636504	81.64335938	0.019037932	0.788104296	0.443137258	0	308.5681	985.8018	650.8444	0.3785	4.0039	1237	2.540129569	0.005867699	42.86954887	0.099028658
21.2625737	×ÔÉí³µÁ¾	Road 1	287.4416908	81.6859314	0.018629644	0.788524806	0.443137258	0	308.9083	985.8203	650.8272	0.3662	4.0172	1238	2.73867606	0.006326342	42.91517716	0.099134059
21.27925604	×ÔÉí³µÁ¾	Road 1	287.8204081	81.72609329	0.018125966	0.787104428	0.443137258	0	309.3621	985.8457	650.8042	0.349	4.0364	1239	2.635551222	0.006088123	42.95914431	0.099235623
21.29593251	×ÔÉí³µÁ¾	Road 1	288.1991779	81.76616592	0.017662479	0.788634837	0.443137258	0	309.748	985.8662	650.7847	0.3365	4.0509	1240	2.633514276	0.006083418	43.00306204	0.099337073
21.31264454	×ÔÉí³µÁ¾	Road 1	288.5789087	81.79922791	0.017194759	0.788019001	0.443137258	0	310.066	985.8838	650.7687	0.3245	4.0637	1241	2.334431901	0.005392538	43.04207513	0.099427194
21.32923377	×ÔÉí³µÁ¾	Road 1	288.9560889	81.85121384	0.016711421	0.788470268	0.443137258	0	310.566	985.9102	650.7434	0.307	4.0829	1242	3.15256957	0.007282436	43.09437384	0.099548004
21.34592197	×ÔÉí³µÁ¾	Road 1	289.3356719	81.88411102	0.016337233	0.788572073	0.443137258	0	310.8843	985.9277	650.7273	0.2962	4.0967	1243	2.331556574	0.005385896	43.13328333	0.099637884
21.36260651	×ÔÉí³µÁ¾	Road 1	289.7153251	81.91726227	0.015974479	0.787914872	0.443137258	0	311.2028	985.9443	650.7112	0.2855	4.1085	1244	2.34346111	0.005413395	43.17238289	0.099728204
21.37923203	×ÔÉí³µÁ¾	Road 1	290.0938635	81.96665268	0.015628576	0.788333178	0.443137258	0	311.6808	985.9688	650.687	0.27	4.1262	1245	3.041232627	0.007025247	43.22294496	0.099845003
21.39588211	×ÔÉí³µÁ¾	Road 1	290.4731144	81.99981079	0.015429126	0.788004875	0.443137258	0	311.9995	985.9854	650.671	0.2602	4.138	1246	2.348725966	0.005425557	43.26205144	0.099935339
21.41257288	×ÔÉí³µÁ¾	Road 1	290.8534454	82.03285904	0.015321567	0.787906349	0.443137258	0	312.3185	986.002	650.6548	0.2494	4.1498	1247	2.341446397	0.005408741	43.30113198	0.100025615
21.42924385	×ÔÉí³µÁ¾	Road 1	291.2335656	82.08474884	0.01531592	0.787625313	0.443137258	0	312.8199	986.0273	650.6295	0.2331	4.1681	1248	3.145726157	0.007266627	43.3535743	0.100146757
21.44591959	×ÔÉí³µÁ¾	Road 1	291.6139443	82.11711044	0.015338517	0.771025538	0.443137258	0	313.1393	986.0439	650.6133	0.2233	4.1799	1249	2.31560015	0.005349036	43.39218864	0.100235956
21.46256784	×ÔÉí³µÁ¾	Road 1	291.9938427	82.1488472	0.015434801	0.74873364	0.443137258	0	313.4586	986.0596	650.5972	0.2135	4.1907	1250	2.292018994	0.005294564	43.43034674	0.100324101
21.47929086	×ÔÉí³µÁ¾	Road 1	292.375661	82.19481125	0.015605696	0.674998522	0.443137258	0	313.9609	986.084	650.5718	0.1982	4.2076	1251	2.891111506	0.006678468	43.47869487	0.100435785
21.49590575	×ÔÉí³µÁ¾	Road 1	292.7551303	82.22078018	0.015789369	0.623781204	0.443137258	0	314.2807	986.0986	650.5555	0.1904	4.2173	1252	2.04990312	0.004735276	43.51275378	0.100514461
21.51259432	×ÔÉí³µÁ¾	Road 1	293.1363907	82.24418793	0.01600353	0.571367681	0.435294122	0	314.6006	986.1123	650.5393	0.1825	4.226	1253	1.936451547	0.004473203	43.54507039	0.100589113
21.52920408	×ÔÉí³µÁ¾	Road 1	293.5160067	82.27798462	0.016254846	0.546269119	0.435294122	0	315.1036	986.1318	650.5138	0.1721	4.2397	1254	2.386439512	0.005512675	43.58470857	0.100680677
21.54593407	×ÔÉí³µÁ¾	Road 1	293.8984725	82.29991608	0.016538475	0.554337323	0.435294122	0	315.4239	986.1416	650.4976	0.1692	4.2458	1255	1.872347547	0.004325123	43.61603293	0.100753036
21.56255959	×ÔÉí³µÁ¾	Road 1	294.2786636	82.32451859	0.016807355	0.578132749	0.435294122	0	315.7673	986.1523	650.48	0.1657	4.2533	1256	1.992945658	0.004603704	43.64916669	0.100829575
21.57921957	×ÔÉí³µÁ¾	Road 1	294.6598195	82.36273727	0.017109511	0.623268843	0.435294122	0	316.2482	986.1641	650.4556	0.1637	4.2612	1257	2.573066048	0.005943783	43.69203391	0.100928598
21.59591217	×ÔÉí³µÁ¾	Road 1	295.0418512	82.39064941	0.017329292	0.653193593	0.435294122	0	316.569	986.1709	650.4392	0.1637	4.2661	1258	2.131198595	0.004923069	43.72760915	0.101010777
21.61259853	×ÔÉí³µÁ¾	Road 1	295.4238885	82.42261963	0.017520048	0.681956708	0.435294122	0	316.9128	986.1787	650.4217	0.1631	4.2736	1259	2.305518851	0.005325749	43.76607989	0.101099645
21.62931533	×ÔÉí³µÁ¾	Road 1	295.8068555	82.47283401	0.017681113	0.718354344	0.435294122	0	317.4173	986.1885	650.3959	0.1645	4.282	1260	3.081717143	0.007118767	43.81759632	0.101218648
21.64594708	×ÔÉí³µÁ¾	Road 1	296.188027	82.50586853	0.017805679	0.737171113	0.435294122	0	317.7386	986.1943	650.3795	0.1655	4.288	1261	2.357639247	0.005446147	43.85680799	0.101309226
21.6625891	×ÔÉí³µÁ¾	Road 1	296.5695915	82.54002228	0.017880699	0.751403451	0.435294122	0	318.0599	986.2012	650.3632	0.1665	4.2958	1262	2.405570455	0.005556868	43.89684153	0.101401704
21.67926154	×ÔÉí³µÁ¾	Road 1	296.9520931	82.59174042	0.017937101	0.769170463	0.435294122	0	318.5421	986.21	650.3385	0.1685	4.3057	1263	3.155767309	0.007289822	43.94945587	0.101523243
21.69587569	×ÔÉí³µÁ¾	Road 1	297.3334182	82.62652588	0.017981052	0.773188949	0.435294122	0	318.7029	986.2129	650.3303	0.1705	4.3126	1264	2.437373118	0.005630332	43.98995078	0.101616786
21.71256426	×ÔÉí³µÁ¾	Road 1	297.716624	82.6638382	0.017993622	0.781574368	0.435294122	0	319.2086	986.2217	650.3045	0.1729	4.319	1265	2.539789395	0.005866914	44.03233622	0.101714697
21.72922241	×ÔÉí³µÁ¾	Road 1	298.099369	82.71521301	0.017993622	0.783154964	0.443137258	0	319.6915	986.2305	650.2798	0.1749	4.3289	1266	3.147216723	0.007270071	44.08476301	0.101835803
21.74593773	×ÔÉí³µÁ¾	Road 1	298.483585	82.7490509	0.017993622	0.782525957	0.443137258	0	320.0136	986.2363	650.2634	0.1768	4.3358	1267	2.390960651	0.005523119	44.1247287	0.101928123
21.76268385	×ÔÉí³µÁ¾	Road 1	298.8686642	82.78248367	0.017993622	0.783564329	0.443137258	0	320.3359	986.2422	650.2469	0.1778	4.3417	1268	2.371843301	0.005478958	44.16444787	0.102019875
21.77925915	×ÔÉí³µÁ¾	Road 1	299.2500564	82.83479233	0.017993622	0.783838749	0.443137258	0	320.8425	986.251	650.2211	0.1803	4.3491	1269	3.202670008	0.007398168	44.21753309	0.102142501
21.79594845	×ÔÉí³µÁ¾	Road 1	299.634225	82.86788864	0.017993622	0.783159494	0.443137258	0	321.1651	986.2559	650.2046	0.1819	4.3527	1270	2.364415802	0.005461801	44.25699354	0.102233655
21.81256335	×ÔÉí³µÁ¾	Road 1	300.0168314	82.90051804	0.018006198	0.782105267	0.443137258	0	321.4878	986.2607	650.1881	0.178	4.3508	1271	2.351465061	0.005431884	44.29606288	0.102323905
21.82926401	×ÔÉí³µÁ¾	Road 1	300.4016519	82.95200958	0.018012488	0.782479584	0.443137258	0	321.9952	986.2676	650.1622	0.1746	4.3464	1272	3.154749926	0.007287472	44.3487493	0.102445611
21.8458877	×ÔÉí³µÁ¾	Road 1	300.7848501	82.98481064	0.01801878	0.783200502	0.443137258	0	322.3183	986.2715	650.1456	0.1736	4.3435	1273	2.360208697	0.005452082	44.38798467	0.102536245
21.86261695	×ÔÉí³µÁ¾	Road 1	301.1706336	83.01748123	0.01801878	0.782999873	0.443137258	0	322.6414	986.2754	650.1292	0.1717	4.3416	1274	2.34649593	0.005420406	44.4272398	0.102626924
21.87922708	×ÔÉí³µÁ¾	Road 1	301.5539069	83.06883545	0.01801878	0.782325566	0.443137258	0	323.1496	986.2813	650.1031	0.1712	4.3373	1275	3.164900791	0.007310921	44.4798092	0.102748359
21.89594681	×ÔÉí³µÁ¾	Road 1	301.9398716	83.10379944	0.01801878	0.783599615	0.443137258	0	323.4962	986.2842	650.0854	0.1726	4.3329	1276	2.44789409	0.005654635	44.52073732	0.102842903
21.9126471	×ÔÉí³µÁ¾	Road 1	302.3255283	83.1341011	0.01801878	0.783261836	0.443137258	0	323.7968	986.2871	650.07	0.1732	4.3294	1277	2.249931456	0.005197342	44.55831185	0.1029297
21.92930781	×ÔÉí³µÁ¾	Road 1	302.7105091	83.18558578	0.01801878	0.783499956	0.443137258	0	324.3056	986.291	650.0439	0.1756	4.3241	1278	3.16780793	0.007317636	44.61108978	0.103051617
21.94588788	×ÔÉí³µÁ¾	Road 1	303.0937881	83.22068024	0.017962206	0.783500075	0.443137258	0	324.6527	986.293	650.0262	0.179	4.3188	1279	2.469237653	0.005703939	44.6520299	0.103146189
21.96263437	×ÔÉí³µÁ¾	Road 1	303.4811319	83.26747513	0.01786818	0.783413351	0.443137258	0	325.1158	986.2959	650.0024	0.1825	4.3133	1280	2.957844693	0.006832621	44.7015634	0.103260611
21.97922433	×ÔÉí³µÁ¾	Road 1	303.8650058	83.30013199	0.017693544	0.783743978	0.443137258	0	325.4401	986.2979	649.9859	0.1845	4.3094	1281	2.364670305	0.005462388	44.7407932	0.103351232
21.99587368	×ÔÉí³µÁ¾	Road 1	304.2504055	83.33292618	0.017495357	0.784208655	0.443137258	0	325.7646	986.2998	649.9692	0.1875	4.3045	1282	2.366365909	0.005466305	44.78019165	0.103442243
22.01262786	×ÔÉí³µÁ¾	Road 1	304.6384607	83.38208313	0.017255824	0.784289777	0.443137258	0	326.2514	986.3018	649.9443	0.1933	4.2976	1283	3.062110982	0.007073476	44.83149481	0.103560753
22.02922882	×ÔÉí³µÁ¾	Road 1	305.0230962	83.4100914	0.016970074	0.784790635	0.443137258	0	326.4138	986.3027	649.9359	0.1943	4.2956	1284	2.164684029	0.00500042	44.86743065	0.103643765
22.0458954	×ÔÉí³µÁ¾	Road 1	305.4094363	83.44993744	0.016597975	0.784720182	0.443137258	0	326.9243	986.3047	649.9098	0.1996	4.2873	1285	2.672804484	0.006174178	44.91197714	0.103746667
22.06257847	×ÔÉí³µÁ¾	Road 1	305.796387	83.49916306	0.016219622	0.784840703	0.443137258	0	327.4119	986.3057	649.8848	0.2065	4.2795	1286	3.077980302	0.007110134	44.96332731	0.103865286
22.07922158	×ÔÉí³µÁ¾	Road 1	306.1825626	83.53195724	0.015789369	0.784487903	0.443137258	0	327.7371	986.3066	649.8681	0.2104	4.2745	1287	2.371834126	0.005478937	45.00280201	0.103956473
22.09591308	×ÔÉí³µÁ¾	Road 1	306.570065	83.57834702	0.015395106	0.78595829	0.443137258	0	328.0624	986.3076	649.8512	0.2144	4.2686	1288	2.956877125	0.006830386	45.05215673	0.104070482
22.11262804	×ÔÉí³µÁ¾	Road 1	306.9582098	83.59705124	0.014957383	0.787381947	0.443137258	0	328.3879	986.3086	649.8345	0.2183	4.2637	1289	1.758531201	0.004062207	45.08155051	0.104138382
22.12921911	×ÔÉí³µÁ¾	Road 1	307.3437396	83.65389862	0.014408444	0.784964859	0.443137258	0	328.9461	986.3096	649.8061	0.2255	4.2545	1290	3.426853488	0.007916032	45.13840566	0.104269717
22.14588751	×ÔÉí³µÁ¾	Road 1	307.7312182	83.68663101	0.013883676	0.786142826	0.443137258	0	329.2719	986.3096	649.7893	0.2304	4.2486	1291	2.37082879	0.005476615	45.1779236	0.104361004
22.16258378	×ÔÉí³µÁ¾	Road 1	308.1195728	83.73588409	0.01335634	0.785316169	0.435294122	0	329.7609	986.3105	649.7643	0.2373	4.2398	1292	3.085360319	0.007127182	45.2294376	0.104480001
22.17923276	×ÔÉí³µÁ¾	Road 1	308.5069143	83.75462952	0.012777369	0.78501302	0.435294122	0	329.9473	986.3105	649.7547	0.2397	4.2364	1293	1.766280825	0.004080109	45.25884437	0.10454793
22.19591656	×ÔÉí³µÁ¾	Road 1	308.8952494	83.7942421	0.012278613	0.781433702	0.427450985	0	330.3434	986.3105	649.7344	0.2459	4.2292	1294	2.670680434	0.006169272	45.30340148	0.104650857
22.212589	×ÔÉí³µÁ¾	Road 1	309.2835784	83.85001831	0.011797751	0.776041865	0.427450985	0	330.903	986.3105	649.7057	0.254	4.2181	1295	3.375547202	0.007797514	45.35968009	0.104780861
22.22927427	×ÔÉí³µÁ¾	Road 1	309.6723558	83.88228378	0.011265077	0.773525178	0.427450985	0	331.2295	986.3105	649.689	0.2589	4.2121	1296	2.353954669	0.005437635	45.39895645	0.104871589
22.24593682	×ÔÉí³µÁ¾	Road 1	310.0607518	83.9142952	0.010815708	0.770795226	0.419607848	0	331.5562	986.3105	649.6722	0.2639	4.2062	1297	2.345598046	0.005418331	45.43804008	0.104961873
22.26259203	×ÔÉí³µÁ¾	Road 1	310.4492095	83.96457138	0.010387166	0.779477239	0.419607848	0	332.0699	986.3105	649.6458	0.2722	4.1969	1298	3.142790972	0.007259847	45.49038393	0.105082787
22.27926777	×ÔÉí³µÁ¾	Road 1	310.8382962	83.99700851	0.009936206	0.768673062	0.419607848	0	332.3969	986.3096	649.629	0.2781	4.1891	1299	2.365035897	0.005463233	45.52982265	0.10517389
22.29590355	×ÔÉí³µÁ¾	Road 1	311.226596	84.02846375	0.009560218	0.75882107	0.419607848	0	332.7241	986.3096	649.6122	0.283	4.1831	1300	2.326356215	0.005373883	45.56852341	0.105263289
22.3125529	×ÔÉí³µÁ¾	Road 1	311.6154405	84.07777176	0.009226019	0.756373167	0.419607848	0	333.2384	986.3086	649.5858	0.2923	4.1729	1301	3.105169763	0.007172942	45.62022246	0.105382714
22.32920151	×ÔÉí³µÁ¾	Road 1	312.0043606	84.09784927	0.008899699	0.758773983	0.419607848	0	333.4021	986.3086	649.5774	0.2943	4.1699	1302	1.830445085	0.004228328	45.65069683	0.10545311
22.34589448	×ÔÉí³µÁ¾	Road 1	312.3945257	84.14287949	0.00863115	0.760742843	0.419607848	0	333.9169	986.3076	649.551	0.3036	4.1587	1303	2.915476368	0.00673475	45.69936478	0.105565533
22.36255079	×ÔÉí³µÁ¾	Road 1	312.7839793	84.17425919	0.008405852	0.758714497	0.419607848	0	334.2446	986.3066	649.5342	0.3096	4.1518	1304	2.324880328	0.005370474	45.73808872	0.105654985
22.37920454	×ÔÉí³µÁ¾	Road 1	313.1736107	84.22568893	0.00817336	0.755531609	0.419607848	0	334.7832	986.3057	649.5065	0.3193	4.1411	1305	3.202214846	0.007397116	45.79141759	0.105778175
22.39587881	×ÔÉí³µÁ¾	Road 1	313.5638672	84.2569519	0.008	0.755859435	0.419607848	0	335.1113	986.3047	649.4896	0.3252	4.1342	1306	2.320296862	0.005359886	45.83010685	0.105867547
22.41258094	×ÔÉí³µÁ¾	Road 1	313.9549934	84.30387726	0.007839944	0.756139278	0.419607848	0	335.6036	986.3037	649.4644	0.3341	4.1243	1307	3.002025343	0.006934679	45.88024707	0.105983371
22.42923908	×ÔÉí³µÁ¾	Road 1	314.3451722	84.32173004	0.007696304	0.755640447	0.419607848	0	335.7677	986.3027	649.4559	0.3381	4.1194	1308	1.736718493	0.00401182	45.90917758	0.1060502
22.44591739	×ÔÉí³µÁ¾	Road 1	314.7360711	84.37748566	0.007582664	0.754586875	0.419607848	0	336.2604	986.3008	649.4307	0.348	4.1086	1309	3.393124405	0.007838117	45.96576914	0.106180927
22.46264151	×ÔÉí³µÁ¾	Road 1	315.1282096	84.41090469	0.007477147	0.754384935	0.419607848	0	336.7298	986.2998	649.4065	0.3565	4.0991	1310	2.413920444	0.005576156	46.00613985	0.106274183
22.47924797	×ÔÉí³µÁ¾	Road 1	315.5177325	84.44198914	0.00736568	0.754916131	0.419607848	0	337.0586	986.2988	649.3896	0.3635	4.0922	1311	2.322478079	0.005364924	46.04470798	0.106363275
22.49593398	×ÔÉí³µÁ¾	Road 1	315.909338	84.48875656	0.007251895	0.754314482	0.419607848	0	337.5519	986.2969	649.3643	0.3734	4.0813	1312	3.003027619	0.006936994	46.09481651	0.106479026
22.51260862	×ÔÉí³µÁ¾	Road 1	316.3008313	84.52214127	0.007105397	0.754169643	0.419607848	0	337.9045	986.2949	649.3462	0.3808	4.073	1313	2.419533982	0.005589123	46.13516137	0.106572223
22.52931038	×ÔÉí³µÁ¾	Road 1	316.6931057	84.55319824	0.006910938	0.75387305	0.411764711	0	338.2337	986.2939	649.3293	0.3878	4.0651	1314	2.316137451	0.005350278	46.17384495	0.106661582
22.5459425	×ÔÉí³µÁ¾	Road 1	317.0839606	84.6000206	0.00668751	0.750671625	0.411764711	0	338.7277	986.292	649.3038	0.3977	4.0542	1315	3.015638239	0.006966124	46.2240014	0.106777443
22.56254859	×ÔÉí³µÁ¾	Road 1	317.4743461	84.63085098	0.006424551	0.748268962	0.411764711	0	339.0572	986.29	649.287	0.4047	4.0463	1316	2.315846951	0.005349606	46.26245857	0.106866279
22.57919317	×ÔÉí³µÁ¾	Road 1	317.8657886	84.6637825	0.006128632	0.747133851	0.403921574	0	339.4104	986.2881	649.2688	0.4131	4.038	1317	2.405817842	0.005557439	46.3025024	0.106958781
22.59592866	×ÔÉí³µÁ¾	Road 1	318.259584	84.71001434	0.00587169	0.742630601	0.396078438	0	339.9051	986.2861	649.2434	0.423	4.0271	1318	2.980627196	0.006885249	46.35238465	0.107074009
22.6126132	×ÔÉí³µÁ¾	Road 1	318.6523202	84.74015808	0.005633619	0.738552511	0.396078438	0	340.235	986.2842	649.2264	0.431	4.0192	1319	2.281932204	0.005271263	46.39045763	0.107161957
22.62919326	×ÔÉí³µÁ¾	Road 1	319.0427468	84.77262955	0.005365511	0.73353374	0.388235301	0	340.5886	986.2822	649.2083	0.4384	4.0109	1320	2.393844439	0.005529781	46.43014774	0.107253641
22.64589246	×ÔÉí³µÁ¾	Road 1	319.4361575	84.81329956	0.005119632	0.729551971	0.380392164	0	340.9424	986.2803	649.1901	0.4458	4.0016	1321	2.74428611	0.006339301	46.47597512	0.107359503
22.66262245	×ÔÉí³µÁ¾	Road 1	319.8304708	84.84930038	0.004886654	0.722104251	0.380392164	0	341.4378	986.2773	649.1646	0.4577	3.9897	1322	2.537499136	0.005861623	46.51842745	0.107457567
22.67922268	×ÔÉí³µÁ¾	Road 1	320.221871	84.88078995	0.004645543	0.717278957	0.380392164	0	341.7919	986.2754	649.1464	0.4651	3.9813	1323	2.351399522	0.005431733	46.55746122	0.107547735
22.69593214	×ÔÉí³µÁ¾	Road 1	320.6160205	84.92034073	0.0044545	0.713539839	0.380392164	0	342.1225	986.2744	649.1294	0.4721	3.9743	1324	2.697140951	0.006230396	46.60252899	0.107651842
22.71260495	×ÔÉí³µÁ¾	Road 1	321.0094686	84.95349197	0.004285654	0.710981071	0.372549027	0	342.6186	986.2715	649.1039	0.4831	3.9624	1325	2.420237777	0.005590749	46.64288115	0.107745055
22.72928106	×ÔÉí³µÁ¾	Road 1	321.4031284	84.98237228	0.004123483	0.707863212	0.372549027	0	342.9494	986.2695	649.0869	0.4911	3.9544	1326	2.232646531	0.005157413	46.680113	0.107831061
22.74645604	×ÔÉí³µÁ¾	Road 1	321.8087693	85.02523956	0.00400227	0.70277983	0.372549027	0	343.4459	986.2656	649.0614	0.504	3.9414	1327	2.79480718	0.006456005	46.72811378	0.107941943
22.76259075	×ÔÉí³µÁ¾	Road 1	322.1899687	85.05379715	0.00389931	0.700233102	0.372549027	0	343.7771	986.2637	649.0444	0.511	3.9334	1328	2.262281126	0.005225869	46.76461501	0.108026261
22.77920197	×ÔÉí³µÁ¾	Road 1	322.5825666	85.08418808	0.00377145	0.698458672	0.372549027	0	344.132	986.2617	649.0261	0.5194	3.925	1329	2.306779402	0.00532866	46.80293344	0.108114776
22.7959195	×ÔÉí³µÁ¾	Road 1	322.9778739	85.12660904	0.003629091	0.697365642	0.372549027	0	344.6291	986.2588	649.0006	0.5304	3.912	1330	2.828383584	0.006533566	46.85021702	0.108224001
22.81262126	×ÔÉí³µÁ¾	Road 1	323.3729395	85.1548439	0.00345467	0.695974946	0.372549027	0	344.9606	986.2568	648.9835	0.5383	3.904	1331	2.206181771	0.00509628	46.88706415	0.108309118
22.82926218	×ÔÉí³µÁ¾	Road 1	323.766696	85.1830101	0.003227595	0.694146216	0.372549027	0	345.2923	986.2539	648.9664	0.5473	3.895	1332	2.208325569	0.005101232	46.92381271	0.108394007
22.84588513	×ÔÉí³µÁ¾	Road 1	324.1601573	85.2111145	0.003010694	0.694414556	0.372549027	0	345.624	986.252	648.9494	0.5543	3.887	1333	2.207565048	0.005099475	46.96050896	0.108478776
22.86259386	×ÔÉí³µÁ¾	Road 1	324.555881	85.26115036	0.002803735	0.69315958	0.36470589	0	346.2167	986.248	648.9189	0.5689	3.8723	1334	3.168985768	0.007320357	47.01345869	0.10860109
22.87925824	×ÔÉí³µÁ¾	Road 1	324.9506838	85.28913803	0.002594366	0.690910757	0.36470589	0	346.5488	986.2461	648.9019	0.5769	3.8643	1335	2.201053702	0.005084434	47.05013787	0.108685818
22.89584564	×ÔÉí³µÁ¾	Road 1	325.3437914	85.31699524	0.002431932	0.688203156	0.356862754	0	346.881	986.2432	648.8848	0.5849	3.8553	1336	2.20162316	0.005085749	47.08665707	0.108770178
22.91262804	×ÔÉí³µÁ¾	Road 1	325.7417231	85.36047363	0.002278008	0.683676839	0.356862754	0	347.4032	986.2402	648.8579	0.5972	3.8429	1337	2.874553033	0.006640218	47.13489899	0.108881617
22.92919015	×ÔÉí³µÁ¾	Road 1	326.1345485	85.38596878	0.002114088	0.681910336	0.349019617	0	347.5694	986.2383	648.8494	0.6022	3.8379	1338	2.099847145	0.004850647	47.16967688	0.108961954
22.94588312	×ÔÉí³µÁ¾	Road 1	326.5306313	85.42103577	0.001975472	0.67743063	0.349019617	0	348.0444	986.2354	648.825	0.6127	3.8263	1339	2.514805819	0.005809201	47.21165646	0.109058926
22.9626439	×ÔÉí³µÁ¾	Road 1	326.9284852	85.45391235	0.001843053	0.672088623	0.34117648	0	348.5434	986.2314	648.7993	0.6257	3.8133	1340	2.41292617	0.005573859	47.25209898	0.109152349
22.9791994	×ÔÉí³µÁ¾	Road 1	327.3215902	85.48078079	0.00169577	0.668502033	0.34117648	0	348.8762	986.2295	648.7822	0.6337	3.8053	1341	2.163557812	0.004997819	47.28791778	0.10923509
22.99587074	×ÔÉí³µÁ¾	Road 1	327.7176303	85.52068176	0.001580032	0.661883712	0.333333343	0	349.3756	986.2256	648.7565	0.6466	3.7924	1342	2.733623107	0.006314669	47.33349094	0.109340364
23.01256994	×ÔÉí³µÁ¾	Road 1	328.1144538	85.54691162	0.001475609	0.657695234	0.325490206	0	349.7087	986.2236	648.7394	0.6546	3.7835	1343	2.126415314	0.004912019	47.36900037	0.109422391
23.02927207	×ÔÉí³µÁ¾	Road 1	328.5114688	85.57313461	0.001384971	0.652573764	0.31764707	0	350.0419	986.2207	648.7222	0.6626	3.7745	1344	2.126467381	0.00491214	47.40451691	0.109504434
23.04589393	×ÔÉí³µÁ¾	Road 1	328.9067541	85.61182709	0.001315633	0.643134296	0.309803933	0	350.5418	986.2168	648.6965	0.6755	3.7616	1345	2.687721075	0.006208636	47.44919182	0.109607633
23.06257004	×ÔÉí³µÁ¾	Road 1	329.3034486	85.63750763	0.001257161	0.692068815	0.301960796	0	350.8752	986.2148	648.6794	0.6835	3.7536	1346	2.105588239	0.004863909	47.48430483	0.109688744
23.079263	×ÔÉí³µÁ¾	Road 1	329.7008592	85.70544434	0.001198381	1.370319009	0.286274523	0	351.3756	986.2109	648.6537	0.6965	3.7406	1347	3.979744228	0.009193209	47.55073857	0.109842206
23.09591125	×ÔÉí³µÁ¾	Road 1	330.09752	85.77351151	0.001162591	1.514360547	0.278431386	0	351.7095	986.209	648.6365	0.7045	3.7326	1348	3.996572009	0.009232081	47.61727449	0.109995904
23.11253714	×ÔÉí³µÁ¾	Road 1	330.4939415	85.83708801	0.001143463	1.252664804	0.270588249	0	352.0436	986.2061	648.6193	0.7134	3.7237	1349	3.80318263	0.008785352	47.68050578	0.110141968
23.12924587	×ÔÉí³µÁ¾	Road 1	330.8925514	85.8829834	0.001131492	0.888740897	0.262745112	0	352.378	986.2031	648.6021	0.7214	3.7147	1350	3.0060985	0.006944088	47.73073386	0.110257995
23.14584719	×ÔÉí³µÁ¾	Road 1	331.2888441	85.93610916	0.001123557	0.796980619	0.262745112	0	352.9275	986.1992	648.5739	0.7353	3.7008	1351	3.344229802	0.007725171	47.78625252	0.110386243
23.16257388	×ÔÉí³µÁ¾	Road 1	331.6883167	85.97644958	0.001116645	0.957625687	0.254901975	0	353.2862	986.1963	648.5554	0.7447	3.6914	1352	2.760223281	0.006376116	47.83242192	0.110492895
23.17923276	×ÔÉí³µÁ¾	Road 1	332.0863694	86.01959152	0.001105841	0.994582355	0.247058824	0	353.621	986.1943	648.5382	0.7527	3.6834	1353	2.893707329	0.006684464	47.88062783	0.11060425
23.19590923	×ÔÉí³µÁ¾	Road 1	332.4851129	86.07795639	0.001086375	0.807342827	0.247058824	0	354.1236	986.1904	648.5123	0.7657	3.6704	1354	3.572080903	0.008251507	47.94019754	0.110741856
23.21259157	×ÔÉí³µÁ¾	Road 1	332.8841465	86.11028366	0.00106046	0.694943368	0.247058824	0	354.4828	986.1875	648.4939	0.7751	3.661	1355	2.411525537	0.005570624	47.98042742	0.110834787
23.22918667	×ÔÉí³µÁ¾	Road 1	333.2812209	86.13798294	0.001027485	0.695299327	0.247058824	0	354.8182	986.1846	648.4766	0.7842	3.652	1356	2.212262356	0.005110326	48.01714013	0.110919594
23.24590053	×ÔÉí³µÁ¾	Road 1	333.6813454	86.18283463	0.001001603	0.755211651	0.247058824	0	355.3214	986.1807	648.4507	0.7972	3.639	1357	2.968436384	0.006857088	48.06675416	0.111034202
23.26260816	×ÔÉí³µÁ¾	Road 1	334.0814631	86.21354141	0.000980671	0.725657642	0.262745112	0	355.6571	986.1787	648.4335	0.8053	3.631	1358	2.339635688	0.005404558	48.10584393	0.111124499
23.27922891	×ÔÉí³µÁ¾	Road 1	334.4796364	86.2429985	0.0009636	0.647580981	0.262745112	0	356.0169	986.1758	648.415	0.8138	3.6215	1359	2.291471671	0.0052933	48.14392992	0.111212478
23.29588339	×ÔÉí³µÁ¾	Road 1	334.878782	86.27855301	0.000950264	0.594937682	0.262745112	0	356.5207	986.1719	648.3891	0.8269	3.6085	1360	2.562494304	0.005919362	48.18660692	0.111311062
23.31262108	×ÔÉí³µÁ¾	Road 1	335.280027	86.30117111	0.000937929	0.594980776	0.262745112	0	356.8567	986.1689	648.3718	0.836	3.5995	1361	1.97893661	0.004571344	48.21972974	0.111387576
23.3292444	×ÔÉí³µÁ¾	Road 1	335.6786924	86.33626556	0.000917032	0.602661252	0.270588249	0	357.3609	986.165	648.3458	0.8491	3.5865	1362	2.546352373	0.005882074	48.26205858	0.111485355
23.34587908	×ÔÉí³µÁ¾	Road 1	336.0777363	86.35918579	0.000906701	0.581991374	0.278431386	0	357.6971	986.1621	648.3286	0.8582	3.5774	1363	1.999860463	0.004619678	48.29532563	0.111562202
23.36255189	×ÔÉí³µÁ¾	Road 1	336.4777953	86.38093185	0.000901565	0.555756152	0.278431386	0	358.0334	986.1592	648.3113	0.8672	3.5684	1364	1.945379079	0.004493826	48.32776056	0.111637127
23.37923203	×ÔÉí³µÁ¾	Road 1	336.8781729	86.41172104	0.0008973	0.543472469	0.286274523	0	358.5381	986.1553	648.2853	0.8803	3.5553	1365	2.35027406	0.005429133	48.36696345	0.111727686
23.39587441	×ÔÉí³µÁ¾	Road 1	337.2777399	86.43239594	0.000894747	0.548628271	0.294117659	0	358.8746	986.1523	648.268	0.8894	3.5463	1366	1.900075689	0.004389175	48.39858524	0.111800732
23.41256371	×ÔÉí³µÁ¾	Road 1	337.6785295	86.45314636	0.000892199	0.549444199	0.301960796	0	359.2112	986.1504	648.2507	0.8975	3.5383	1367	1.901231278	0.004391844	48.43031546	0.111874029
23.42922002	×ÔÉí³µÁ¾	Road 1	338.0786692	86.48391495	0.000889656	0.539473653	0.301960796	0	359.7163	986.1455	648.2247	0.9116	3.5242	1368	2.353036282	0.005435514	48.46950836	0.111964564
23.44591299	×ÔÉí³µÁ¾	Road 1	338.4797819	86.50383453	0.000887963	0.532652438	0.309803933	0	360.0531	986.1436	648.2074	0.9197	3.5162	1369	1.864767131	0.004307612	48.50063686	0.112036471
23.46258176	×ÔÉí³µÁ¾	Road 1	338.880451	86.53357315	0.000883741	0.531955004	0.309803933	0	360.5584	986.1387	648.1814	0.9338	3.5021	1370	2.306990663	0.005329148	48.53909157	0.112125302
23.4791633	×ÔÉí³µÁ¾	Road 1	339.2791148	86.55349274	0.000877852	0.53439182	0.309803933	0	360.8954	986.1367	648.1641	0.9419	3.494	1371	1.871663144	0.004323542	48.57012661	0.112196992
23.49583134	×ÔÉí³µÁ¾	Road 1	339.6799508	86.57345352	0.000866985	0.533918738	0.309803933	0	361.2325	986.1338	648.1467	0.9509	3.485	1372	1.869210314	0.004317876	48.60128269	0.112268963
23.5125452	×ÔÉí³µÁ¾	Road 1	340.0820338	86.60468216	0.000854558	0.5283584	0.309803933	0	361.7623	986.1289	648.1195	0.9645	3.4705	1373	2.371737393	0.005478713	48.64092358	0.112360533
23.52919748	×ÔÉí³µÁ¾	Road 1	340.4827324	86.62568665	0.000839804	0.526501656	0.309803933	0	362.1237	986.126	648.1009	0.9739	3.461	1374	1.917914973	0.004430384	48.67286123	0.112434309
23.54584719	×ÔÉí³µÁ¾	Road 1	340.8834659	86.64656067	0.000828446	0.526589751	0.31764707	0	362.4851	986.123	648.0823	0.9834	3.4515	1375	1.91258445	0.00441807	48.70470521	0.112507869
23.56255226	×ÔÉí³µÁ¾	Road 1	341.285622	86.66606827	0.000815592	0.527598739	0.325490206	0	362.8226	986.1211	648.0649	0.9915	3.4434	1376	1.848587763	0.004270238	48.73558599	0.112579204
23.57917778	×ÔÉí³µÁ¾	Road 1	341.6860006	86.69579315	0.000803662	0.529147387	0.325490206	0	363.3289	986.1162	648.0389	1.0056	3.4293	1377	2.313611808	0.005344443	48.77405099	0.112668058
23.59588651	×ÔÉí³µÁ¾	Road 1	342.0884805	86.71681824	0.000795774	0.529327035	0.333333343	0	363.6906	986.1133	648.0203	1.0151	3.4198	1378	1.917347691	0.004429073	48.80608743	0.112742062
23.61257178	×ÔÉí³µÁ¾	Road 1	342.4905261	86.74501877	0.000787157	0.530866444	0.333333343	0	364.1731	986.1094	647.9955	1.0277	3.4071	1379	2.241492158	0.005177847	48.84348734	0.112828456
23.62916797	×ÔÉí³µÁ¾	Road 1	342.8905173	86.76495895	0.000778603	0.532265067	0.333333343	0	364.5109	986.1064	647.9781	1.0367	3.3981	1380	1.875638021	0.004332724	48.87461579	0.112900362
23.64587304	×ÔÉí³µÁ¾	Road 1	343.2932241	86.78474808	0.00077165	0.533312738	0.333333343	0	364.8488	986.1035	647.9607	1.0458	3.389	1381	1.86334501	0.004304327	48.90574309	0.112972267
23.66274452	×ÔÉí³µÁ¾	Road 1	343.70005	86.80762711	0.000764738	0.533424497	0.333333343	0	365.235	986.1006	647.9409	1.0557	3.3791	1382	1.992351031	0.004602331	48.939357	0.113049915
23.67919922	×ÔÉí³µÁ¾	Road 1	344.0969626	86.83748245	0.000760154	0.535182238	0.333333343	0	365.7422	986.0967	647.9148	1.0687	3.366	1383	2.336777058	0.005397955	48.97780798	0.113138736
23.69588302	×ÔÉí³µÁ¾	Road 1	344.4994944	86.8575737	0.000755588	0.534913003	0.34117648	0	366.0804	986.0938	647.8973	1.0778	3.3569	1384	1.879379704	0.004341367	49.00916318	0.113211167
23.71259285	×ÔÉí³µÁ¾	Road 1	344.9027939	86.88766937	0.000753311	0.53772068	0.34117648	0	366.5878	986.0898	647.8713	1.0909	3.3438	1385	2.327952739	0.005377571	49.04806287	0.113301025
23.72915973	×ÔÉí³µÁ¾	Road 1	345.3027352	86.90769196	0.000748773	0.538799107	0.34117648	0	366.9261	986.0869	647.8539	1.0999	3.3347	1386	1.883561905	0.004351028	49.0792676	0.113373108
23.745823	×ÔÉí³µÁ¾	Road 1	345.7050973	86.9279068	0.000744252	0.540358841	0.34117648	0	367.2646	986.084	647.8364	1.1089	3.3256	1387	1.887343777	0.004359764	49.11071693	0.113445756
23.7625068	×ÔÉí³µÁ¾	Road 1	346.108049	86.94817657	0.000738253	0.540320039	0.34117648	0	367.6031	986.0811	647.8191	1.118	3.3165	1388	1.889065954	0.004363742	49.14223373	0.11351856
23.77915725	×ÔÉí³µÁ¾	Road 1	346.5103492	86.98148575	0.000731543	0.541818023	0.34117648	0	368.1595	986.0762	647.7904	1.1329	3.3015	1389	2.479992268	0.005728782	49.18352671	0.113613947
23.79583226	×ÔÉí³µÁ¾	Road 1	346.9133373	87.00190659	0.000726352	0.541548848	0.34117648	0	368.4982	986.0732	647.773	1.141	3.2925	1390	1.897339584	0.004382854	49.21516486	0.113687031
23.81257508	×ÔÉí³µÁ¾	Road 1	347.3181054	87.03224258	0.000717511	0.543976307	0.349019617	0	369.0064	986.0693	647.7468	1.1541	3.2783	1391	2.33945104	0.005404132	49.25433387	0.113777511
23.82921966	×ÔÉí³µÁ¾	Road 1	347.720594	87.05288315	0.000704384	0.543886781	0.349019617	0	369.3454	986.0664	647.7294	1.1631	3.2693	1392	1.909888352	0.004411842	49.28612316	0.113850944
23.84593462	×ÔÉí³µÁ¾	Road 1	348.124879	87.07326965	0.000689272	0.546170771	0.349019617	0	369.6844	986.0635	647.712	1.1722	3.2602	1393	1.894902154	0.004377224	49.31779637	0.11392411
23.86253924	×ÔÉí³µÁ¾	Road 1	348.5265965	87.09664993	0.000676493	0.546525121	0.349019617	0	370.0235	986.0605	647.6945	1.1812	3.2511	1394	2.037091872	0.004705682	49.35162152	0.114002246
23.87923441	×ÔÉí³µÁ¾	Road 1	348.930642	87.1248436	0.00066248	0.54783988	0.349019617	0	370.5323	986.0557	647.6683	1.1953	3.237	1395	2.248930316	0.005195029	49.38916779	0.114088978
23.89584857	×ÔÉí³µÁ¾	Road 1	349.3328222	87.14548416	0.000652787	0.548159122	0.349019617	0	370.8716	986.0527	647.6509	1.2044	3.2279	1396	1.913310958	0.004419748	49.42095584	0.114162408
23.91262658	×ÔÉí³µÁ¾	Road 1	349.7391128	87.17638321	0.000641145	0.549539149	0.356862754	0	371.3807	986.0488	647.6248	1.2175	3.2148	1397	2.365240172	0.005463705	49.46063986	0.114254078
23.92920664	×ÔÉí³µÁ¾	Road 1	350.1407061	87.19721603	0.000626285	0.550493002	0.356862754	0	371.7202	986.0459	647.6073	1.2265	3.2058	1398	1.924929427	0.004446587	49.49255532	0.114327803
23.94586332	×ÔÉí³µÁ¾	Road 1	350.5442507	87.21790466	0.000611656	0.551961422	0.356862754	0	372.0598	986.043	647.5898	1.2356	3.1967	1399	1.914436127	0.004422347	49.52444346	0.114401464
23.96250167	×ÔÉí³µÁ¾	Road 1	350.9475167	87.25371323	0.000599207	0.553948045	0.356862754	0	372.6421	986.0381	647.5598	1.251	3.1813	1400	2.601139032	0.006008631	49.56772213	0.114501438
23.97915065	×ÔÉí³µÁ¾	Road 1	351.3511369	87.27455978	0.000583086	0.554503858	0.36470589	0	372.9819	986.0352	647.5424	1.2601	3.1722	1401	1.923070685	0.004442293	49.59973929	0.114575398
23.99586745	×ÔÉí³µÁ¾	Road 1	351.7565059	87.29715042	0.00056914	0.555452883	0.36470589	0	373.346	986.0322	647.5236	1.2696	3.1627	1402	1.998349138	0.004616187	49.63314528	0.114652566
24.01254502	×ÔÉí³µÁ¾	Road 1	352.1610698	87.32866745	0.000556038	0.558569372	0.36470589	0	373.856	986.0273	647.4974	1.2837	3.1486	1403	2.405171764	0.005555947	49.67325771	0.114745225
24.02916981	×ÔÉí³µÁ¾	Road 1	352.5644516	87.34996719	0.000541921	0.559517801	0.36470589	0	374.1961	986.0244	647.4799	1.2928	3.1395	1404	1.946421166	0.004496233	49.70561654	0.114819974
24.04584921	×ÔÉí³µÁ¾	Road 1	352.9692576	87.37130814	0.00053104	0.56003809	0.372549027	0	374.5363	986.0215	647.4624	1.3019	3.1305	1405	1.945520682	0.004494153	49.73806667	0.114894934
24.06260926	×ÔÉí³µÁ¾	Road 1	353.3761259	87.39390564	0.000519714	0.562536418	0.372549027	0	374.9009	986.0186	647.4437	1.3115	3.1209	1406	1.997907314	0.004615166	49.77155169	0.114972284
24.07914717	×ÔÉí³µÁ¾	Road 1	353.7777068	87.41679153	0.000505059	0.563739479	0.380392164	0	375.2655	986.0156	647.4249	1.321	3.1114	1407	2.025201765	0.004678216	49.8050443	0.115049652
24.09592481	×ÔÉí³µÁ¾	Road 1	354.1852808	87.4536644	0.000492963	0.567889571	0.380392164	0	375.8492	986.0107	647.3949	1.3365	3.096	1408	2.640834903	0.006100329	49.84935128	0.115152001
24.11262621	×ÔÉí³µÁ¾	Road 1	354.591118	87.4785347	0.000481062	0.5696823	0.380392164	0	376.2384	986.0068	647.3748	1.3475	3.0851	1409	2.105980579	0.004864815	49.8845241	0.115233251
24.12913187	×ÔÉí³µÁ¾	Road 1	354.9922984	87.50028763	0.00046825	0.570879996	0.388235301	0	376.5791	986.0039	647.3573	1.3566	3.076	1410	1.977003081	0.004566877	49.91715584	0.11530863
24.14584206	×ÔÉí³µÁ¾	Road 1	355.3985584	87.52357178	0.000456209	0.573596716	0.388235301	0	376.9442	986.001	647.3385	1.3662	3.0664	1411	2.034541165	0.00469979	49.95115342	0.115387164
24.16261714	×ÔÉí³µÁ¾	Road 1	355.8065502	87.55670929	0.000443843	0.576428533	0.396078438	0	377.4555	985.9961	647.3122	1.3794	3.0523	1412	2.475426961	0.005718236	49.99267889	0.115483088
24.17916348	×ÔÉí³µÁ¾	Road 1	356.2090801	87.57872314	0.000429615	0.579130769	0.396078438	0	377.7965	985.9932	647.2947	1.3885	3.0432	1413	1.9879861	0.004592248	50.0255728	0.115559073
24.19584765	×ÔÉí³µÁ¾	Road 1	356.6151174	87.61203232	0.000416204	0.583125114	0.411764711	0	378.3081	985.9893	647.2683	1.4017	3.0301	1414	2.492736617	0.005758222	50.06716204	0.115655144
24.21253512	×ÔÉí³µÁ¾	Road 1	357.0213464	87.63609924	0.00040108	0.586880445	0.411764711	0	378.6737	985.9854	647.2495	1.4123	3.0196	1415	2.073724554	0.004790304	50.10176725	0.115735082
24.22913645	×ÔÉí³µÁ¾	Road 1	357.4255832	87.65878601	0.000382937	0.590666413	0.419607848	0	379.015	985.9824	647.232	1.4214	3.0105	1416	2.016889967	0.004659016	50.1352503	0.115812428
24.24591666	×ÔÉí³µÁ¾	Road 1	357.834283	87.68184357	0.000367694	0.593562126	0.427450985	0	379.3564	985.9795	647.2144	1.4306	3.0013	1417	2.023043742	0.004673231	50.1691974	0.115890846
24.26247913	×ÔÉí³µÁ¾	Road 1	358.2378232	87.71303101	0.000350581	0.598366916	0.435294122	0	379.7466	985.9766	647.1943	1.4406	2.9913	1418	2.409312612	0.005565512	50.20910157	0.115983025
24.2792762	×ÔÉí³µÁ¾	Road 1	358.6472267	87.74462357	0.000331808	0.605373323	0.443137258	0	380.2834	985.9717	647.1667	1.4552	2.9767	1419	2.408415923	0.005563441	50.2495559	0.116076474
24.29589036	×ÔÉí³µÁ¾	Road 1	359.0522815	87.7683609	0.000314987	0.610182285	0.450980395	0	380.6252	985.9688	647.1492	1.4644	2.9675	1420	2.066185222	0.004772888	50.28388383	0.116155772
24.31250378	×ÔÉí³µÁ¾	Road 1	359.4574367	87.79396591	0.000297111	0.615664542	0.458823532	0	380.9914	985.9648	647.1302	1.4749	2.957	1421	2.152018681	0.004971163	50.31963623	0.11623836
24.32922131	×ÔÉí³µÁ¾	Road 1	359.865307	87.83196487	0.000276802	0.624754488	0.466666669	0	381.5287	985.9609	647.1027	1.4886	2.9433	1422	2.708067151	0.006255635	50.36490841	0.116342938
24.34585636	×ÔÉí³µÁ¾	Road 1	360.2712798	87.85678024	0.000258553	0.629309475	0.466666669	0	381.8708	985.958	647.0851	1.4978	2.9342	1423	2.115792298	0.00488748	50.40010472	0.116424242
24.36252037	×ÔÉí³µÁ¾	Road 1	360.6780909	87.88520737	0.00024219	0.634801865	0.474509805	0	382.2618	985.9541	647.0649	1.5088	2.9232	1424	2.278975761	0.005264434	50.4380816	0.116511968
24.3791195	×ÔÉí³µÁ¾	Road 1	361.0834828	87.92094727	0.000222811	0.642792404	0.482352942	0	382.7508	985.9502	647.0398	1.5216	2.9104	1425	2.619459807	0.006050952	50.48156235	0.116612409
24.39587478	×ÔÉí³µÁ¾	Road 1	361.4928076	87.94653854	0.00020513	0.647176921	0.482352942	0	383.0932	985.9473	647.0222	1.5307	2.9012	1426	2.144698808	0.004954254	50.51749738	0.116695419
24.41258387	×ÔÉí³µÁ¾	Road 1	361.9011835	87.98521729	0.000187209	0.654732168	0.482352942	0	383.607	985.9424	646.9957	1.5449	2.887	1427	2.744061966	0.006338783	50.56334817	0.116801334
24.42921196	×ÔÉí³µÁ¾	Road 1	362.3076999	88.01127548	0.000168401	0.658007979	0.482352942	0	383.9497	985.9395	646.9781	1.5541	2.8779	1428	2.176293018	0.005027237	50.59953576	0.116884928
24.44583015	×ÔÉí³µÁ¾	Road 1	362.7140953	88.03746414	0.00015246	0.660049617	0.482352942	0	384.2924	985.9365	646.9605	1.5632	2.8687	1429	2.183532446	0.00504396	50.63582212	0.116968749
24.46250296	×ÔÉí³µÁ¾	Road 1	363.1220182	88.0789032	0.000136827	0.664123654	0.482352942	0	384.8313	985.9316	646.9327	1.5779	2.854	1430	2.876460348	0.006644623	50.68378078	0.117079534
24.47920509	×ÔÉí³µÁ¾	Road 1	363.5307723	88.10341644	0.000120283	0.666810155	0.490196079	0	385.1498	985.9287	646.9164	1.5866	2.8453	1431	2.102560281	0.004856914	50.71889802	0.117160654
24.49583134	×ÔÉí³µÁ¾	Road 1	363.9377931	88.13017502	0.000105946	0.669446826	0.490196079	0	385.4929	985.9258	646.8987	1.5958	2.8362	1432	2.211033062	0.005107486	50.75565922	0.117245573
24.51247336	×ÔÉí³µÁ¾	Road 1	364.3453235	88.15697479	9.28E-05	0.672304749	0.490196079	0	385.8361	985.9229	646.8811	1.605	2.827	1433	2.212338588	0.005110502	50.79247699	0.117330622
24.52916742	×ÔÉí³µÁ¾	Road 1	364.7543431	88.20322037	7.94E-05	0.676779032	0.490196079	0	386.4247	985.917	646.8508	1.6215	2.8105	1434	3.097041578	0.007154166	50.84417921	0.117450054
24.56258671	×ÔÉí³µÁ¾	Road 1	365.5736493	88.2574791	6.88E-05	0.679066241	0.490196079	0	387.1119	985.9111	646.8155	1.6398	2.7921	1435	2.224397907	0.005138359	50.91851701	0.117621774
24.57913562	×ÔÉí³µÁ¾	Road 1	365.9795317	88.29443436	5.91E-05	0.680393755	0.490196079	0	387.4801	985.9082	646.7965	1.6495	2.7825	1436	2.690313668	0.006214625	50.96303877	0.11772462
24.59586745	×ÔÉí³µÁ¾	Road 1	366.390064	88.32966614	4.11E-05	0.682320476	0.490196079	0	388.0205	985.9033	646.7687	1.6642	2.7678	1437	2.594039868	0.005992232	51.00644179	0.117824881
24.61249553	×ÔÉí³µÁ¾	Road 1	366.7981866	88.35901337	3.36E-05	0.683449924	0.490196079	0	388.3891	985.9004	646.7498	1.6738	2.7582	1438	2.334698915	0.005393154	51.04526336	0.117914558
24.62913352	×ÔÉí³µÁ¾	Road 1	367.2067417	88.40004044	2.57E-05	0.683929265	0.490196079	0	388.9053	985.8955	646.7232	1.688	2.7439	1439	2.870920861	0.006631827	51.0930297	0.118024899
24.64683671	×ÔÉí³µÁ¾	Road 1	367.6415888	88.42749939	1.95E-05	0.685039401	0.490196079	0	389.2496	985.8926	646.7056	1.6972	2.7348	1440	2.1728974	0.005019393	51.13149692	0.118113758
24.66316679	×ÔÉí³µÁ¾	Road 1	368.0428506	88.45901642	1.41E-05	0.685498834	0.490196079	0	389.6432	985.8887	646.6853	1.7083	2.7237	1441	2.463159883	0.005689899	51.17172051	0.118206674
24.67909512	×ÔÉí³µÁ¾	Road 1	368.4344224	88.50007095	9.20E-06	0.686606586	0.490196079	0	390.16	985.8848	646.6587	1.7216	2.7105	1442	2.95915298	0.006835643	51.21885488	0.118315555
24.69579688	×ÔÉí³µÁ¾	Road 1	368.8451259	88.52553864	5.68E-06	0.686706424	0.490196079	0	390.48	985.8818	646.6422	1.7303	2.7017	1443	2.154928411	0.004977885	51.25484599	0.118398694
24.71247959	×ÔÉí³µÁ¾	Road 1	369.255498	88.55517426	3.09E-06	0.686786175	0.490196079	0	390.8494	985.8779	646.6232	1.7409	2.6911	1444	2.348020396	0.005423927	51.29401732	0.11848918
24.72918465	×ÔÉí³µÁ¾	Road 1	369.6666121	88.59653091	1.32E-06	0.686966777	0.490196079	0	391.3668	985.874	646.5966	1.7542	2.6779	1445	2.884155977	0.0066624	51.34219732	0.118600476
24.7458285	×ÔÉí³µÁ¾	Road 1	370.0763471	88.624086	4.69E-07	0.686875165	0.490196079	0	391.7118	985.8701	646.5787	1.7644	2.6677	1446	2.25708242	0.00521386	51.37976386	0.118687255
24.76253246	×ÔÉí³µÁ¾	Road 1	370.4876899	88.65166855	9.31E-08	0.687535226	0.490196079	0	392.0569	985.8672	646.561	1.7736	2.6585	1447	2.254386915	0.005207634	51.41742106	0.118774243
24.77912206	×ÔÉí³µÁ¾	Road 1	370.8964071	88.69304581	6.58E-10	0.686926842	0.490196079	0	392.5749	985.8633	646.5344	1.7869	2.6453	1448	2.901127129	0.006701604	51.46554959	0.11888542
24.79578827	×ÔÉí³µÁ¾	Road 1	371.3071399	88.72071075	-1.43E-08	0.686946034	0.474509805	0	392.9203	985.8594	646.5166	1.7971	2.6351	1449	2.262566284	0.005226528	51.50325799	0.118972526
24.81248014	×ÔÉí³µÁ¾	Road 1	371.7186327	88.74825897	-1.90E-07	0.685947299	0.474509805	0	393.2658	985.8564	646.4988	1.8063	2.6259	1450	2.255857152	0.00521103	51.54091246	0.119059508
24.82909136	×ÔÉí³µÁ¾	Road 1	372.128336	88.79127045	-7.64E-07	0.681034863	0.474509805	0	393.809	985.8516	646.4709	1.821	2.6112	1451	2.976971572	0.006876804	51.59036361	0.11917374
24.84600096	×ÔÉí³µÁ¾	Road 1	372.5455355	88.82043915	-1.79E-06	0.679576695	0.466666669	0	394.1795	985.8486	646.4518	1.8307	2.6016	1452	2.314674272	0.005346898	51.62950383	0.119264154
24.86262099	×ÔÉí³µÁ¾	Road 1	372.9557157	88.84756851	-3.40E-06	0.677718639	0.466666669	0	394.5254	985.8457	646.4341	1.8399	2.5924	1453	2.244178586	0.005184053	51.66680213	0.119350313
24.87916586	×ÔÉí³µÁ¾	Road 1	373.364228	88.88819046	-5.94E-06	0.67470175	0.466666669	0	395.0445	985.8408	646.4073	1.8542	2.5781	1454	2.876976204	0.006645815	51.71440135	0.119460267
24.89585737	×ÔÉí³µÁ¾	Road 1	373.7764937	88.91689911	-8.84E-06	0.672205329	0.450980395	0	395.4154	985.8379	646.3882	1.8638	2.5684	1455	2.31300714	0.005343046	51.75300891	0.119549451
24.91252028	×ÔÉí³µÁ¾	Road 1	374.1881676	88.94163208	-1.22E-05	0.669738889	0.443137258	0	395.7369	985.835	646.3717	1.8726	2.5597	1456	2.132499092	0.004926073	51.78854255	0.119631533
24.9291238	×ÔÉí³µÁ¾	Road 1	374.5985666	88.98327713	-1.58E-05	0.662638426	0.427450985	0	396.2813	985.8301	646.3437	1.8873	2.545	1457	2.920428578	0.00674619	51.83703196	0.119743544
24.94576875	×ÔÉí³µÁ¾	Road 1	375.0101108	89.00954132	-1.87E-05	0.655856788	0.411764711	0	396.6279	985.8271	646.3259	1.8965	2.5358	1458	2.205872714	0.005095566	51.8737486	0.119828359
24.96257242	×ÔÉí³µÁ¾	Road 1	375.4257595	89.04814453	-2.13E-05	0.646148384	0.396078438	0	397.1479	985.8223	646.2991	1.9108	2.5215	1459	2.760111677	0.006375858	51.9201286	0.119935497
24.97917191	×ÔÉí³µÁ¾	Road 1	375.836474	89.07330322	-2.40E-05	0.637680531	0.380392164	0	397.4947	985.8193	646.2813	1.92	2.5123	1460	2.159312945	0.004988013	51.9559721	0.120018296
24.99580147	×ÔÉí³µÁ¾	Road 1	376.2480554	89.09999313	-2.65E-05	0.629112363	0.380392164	0	397.8663	985.8164	646.2621	1.9297	2.5026	1461	2.228640611	0.00514816	51.9930334	0.120103907
25.01252742	×ÔÉí³µÁ¾	Road 1	376.6621917	89.13636475	-2.91E-05	0.617944658	0.36470589	0	398.3869	985.8115	646.2354	1.944	2.4883	1462	2.668036366	0.006163164	52.03765886	0.120206992
25.03258208	×ÔÉí³µÁ¾	Road 1	377.1589362	89.1703331	-3.25E-05	0.607399464	0.34117648	0	398.8828	985.8066	646.2098	1.9579	2.474	1463	2.298545537	0.00530964	52.0837554	0.120313475
25.04668093	×ÔÉí³µÁ¾	Road 1	377.5082485	89.19339066	-3.59E-05	0.597811818	0.31764707	0	399.2301	985.8037	646.1919	1.9671	2.4647	1464	2.254157632	0.005207104	52.11553642	0.120386889
25.06242708	×ÔÉí³µÁ¾	Road 1	377.8984826	89.21817169	-3.99E-05	0.584638119	0.294117659	0	399.6022	985.8008	646.1729	1.9768	2.4549	1465	2.20717116	0.005098565	52.15029088	0.120467172
25.07916916	×ÔÉí³µÁ¾	Road 1	378.3135009	89.24012375	-4.28E-05	0.572225511	0.278431386	0	399.9497	985.7979	646.155	1.986	2.4456	1466	2.005169636	0.004631942	52.1838616	0.12054472
25.09583757	×ÔÉí³µÁ¾	Road 1	378.7267995	89.26316071	-4.64E-05	0.559281468	0.262745112	0	400.3221	985.7939	646.1359	1.9967	2.4348	1467	2.060276447	0.004759239	52.21820313	0.120624049
25.11245063	×ÔÉí³µÁ¾	Road 1	379.1388623	89.29278259	-5.07E-05	0.542384386	0.239215687	0	400.8187	985.79	646.1103	2.0096	2.4219	1468	2.370189112	0.005475137	52.25757922	0.120715008
25.12917145	×ÔÉí³µÁ¾	Road 1	379.5536904	89.31264038	-5.50E-05	0.531618178	0.223529413	0	401.1664	985.7871	646.0924	2.0188	2.4126	1469	1.911192613	0.004414855	52.28953593	0.120788828
25.14583913	×ÔÉí³µÁ¾	Road 1	379.9673337	89.34156189	-5.93E-05	0.512542665	0.20784314	0	401.6882	985.7822	646.0656	2.0332	2.3983	1470	2.334377191	0.005392411	52.32844457	0.120878707
25.16249581	×ÔÉí³µÁ¾	Road 1	380.3807883	89.35975113	-6.35E-05	0.500716567	0.192156866	0	402.0361	985.7793	646.0476	2.0424	2.3891	1471	1.838232561	0.004246317	52.35906342	0.120949437
25.17908724	×ÔÉí³µÁ¾	Road 1	380.7927108	89.37872314	-6.91E-05	0.489051521	0.184313729	0	402.4089	985.7754	646.0284	2.0531	2.3784	1472	1.878310162	0.004338896	52.39022728	0.121021425
25.19575931	×ÔÉí³µÁ¾	Road 1	381.2067494	89.40333939	-7.41E-05	0.474241167	0.168627456	0	402.9062	985.7715	646.0029	2.066	2.3655	1473	2.13597436	0.004934101	52.4258384	0.121103687
25.21258461	×ÔÉí³µÁ¾	Road 1	381.6246759	89.42103424	-7.91E-05	0.463653624	0.168627456	0	403.2792	985.7676	645.9836	2.0766	2.3549	1474	1.808129236	0.004176779	52.4562607	0.121173962
25.22914341	×ÔÉí³µÁ¾	Road 1	382.0360614	89.43806992	-8.58E-05	0.4537462	0.160784319	0	403.6523	985.7646	645.9645	2.0862	2.3452	1475	1.790734216	0.004136596	52.48591313	0.121242459
25.24584811	×ÔÉí³µÁ¾	Road 1	382.4511737	89.4601387	-9.34E-05	0.442241728	0.152941182	0	404.1499	985.7607	645.9389	2.099	2.3323	1476	2.017043564	0.004659371	52.51960723	0.121320293
25.26253778	×ÔÉí³µÁ¾	Road 1	382.8659823	89.47516937	-0.000103102	0.432253718	0.152941182	0	404.4983	985.7568	645.921	2.1092	2.3221	1477	1.692239342	0.003909073	52.54785014	0.121385534
25.2791578	×ÔÉí³µÁ¾	Road 1	383.2791267	89.48964386	-0.000116312	0.420050234	0.145098045	0	404.8467	985.7539	645.9031	2.1184	2.3128	1478	1.669506778	0.003856561	52.57559738	0.12144963
25.29581081	×ÔÉí³µÁ¾	Road 1	383.6931946	89.51200104	-0.000127564	0.403231829	0.137254909	0	405.4193	985.749	645.8736	2.1336	2.2976	1479	2.034603354	0.004699934	52.60947965	0.121527898
25.31246932	×ÔÉí³µÁ¾	Road 1	384.1074596	89.52505417	-0.000140012	0.39656958	0.137254909	0	405.7679	985.7461	645.8557	2.1429	2.2884	1480	1.602489988	0.003701752	52.63617475	0.121589564
25.32911061	×ÔÉí³µÁ¾	Road 1	384.5213631	89.53950806	-0.000154824	0.390996724	0.129411772	0	406.1663	985.7422	645.8352	2.154	2.2772	1481	1.66845133	0.003854123	52.66393992	0.121653701
25.34590181	×ÔÉí³µÁ¾	Road 1	384.9390775	89.55712051	-0.000172341	0.383176774	0.129411772	0	406.6644	985.7383	645.8096	2.1669	2.2643	1482	1.808279682	0.004177126	52.69430311	0.12172384
25.36249801	×ÔÉí³µÁ¾	Road 1	385.3519967	89.56927414	-0.000192349	0.377579391	0.121568628	0	407.0132	985.7354	645.7916	2.1762	2.2551	1483	1.563463035	0.0036116	52.72025065	0.121783779
25.37913929	×ÔÉí³µÁ¾	Road 1	385.766096	89.58188782	-0.00021747	0.372630507	0.121568628	0	407.3869	985.7314	645.7724	2.1868	2.2444	1484	1.583504094	0.003657894	52.74660219	0.121844651
25.39582199	×ÔÉí³µÁ¾	Road 1	386.1812795	89.59342346	-0.00024077	0.367761791	0.121568628	0	407.7357	985.7285	645.7545	2.1961	2.2352	1485	1.532186283	0.00353935	52.7721632	0.121903697
25.4125003	×ÔÉí³µÁ¾	Road 1	386.5964358	89.61118011	-0.00026379	0.363207668	0.121568628	0	408.284	985.7236	645.7263	2.2109	2.2203	1486	1.821382301	0.004207393	52.80254077	0.121973869
25.42911409	×ÔÉí³µÁ¾	Road 1	387.0100411	89.62309341	-0.000287036	0.360051692	0.121568628	0	408.6579	985.7207	645.707	2.2206	2.2106	1487	1.55241931	0.003586089	52.82833234	0.122033448
25.44579386	×ÔÉí³µÁ¾	Road 1	387.4253615	89.63872147	-0.000304509	0.356031746	0.121568628	0	409.1565	985.7158	645.6814	2.2345	2.1967	1488	1.722937592	0.003979986	52.85707055	0.122099833
25.46251908	×ÔÉí³µÁ¾	Road 1	387.8418424	89.64490814	-0.000319672	0.355520695	0.121568628	0	409.356	985.7139	645.671	2.24	2.1911	1489	1.283793901	0.002965564	52.87854229	0.122149433
25.47911931	×ÔÉí³µÁ¾	Road 1	388.255285	89.66100998	-0.000339323	0.352779984	0.121568628	0	409.8796	985.71	645.6442	2.2534	2.1777	1490	1.748880771	0.004039915	52.90757411	0.122216496
25.49580715	×ÔÉí³µÁ¾	Road 1	388.6709832	89.67692642	-0.000359764	0.350488126	0.121568628	0	410.4034	985.7051	645.6172	2.2678	2.1633	1491	1.736583805	0.004011509	52.93655393	0.12228344
25.51252687	×ÔÉí³µÁ¾	Road 1	389.0875242	89.68733597	-0.000384387	0.349333823	0.121568628	0	410.7526	985.7021	645.5992	2.277	2.154	1492	1.480095123	0.00341902	52.96130072	0.122340605
25.52910731	×ÔÉí³µÁ¾	Road 1	389.5006438	89.69791031	-0.000414674	0.348165363	0.121568628	0	411.1018	985.6982	645.5813	2.2872	2.1437	1493	1.491992001	0.003446502	52.98603859	0.122397749
25.54576435	×ÔÉí³µÁ¾	Road 1	389.9157438	89.71339417	-0.000443311	0.346996874	0.121568628	0	411.6258	985.6943	645.5543	2.3007	2.1303	1494	1.71840362	0.003969512	53.01466212	0.122463869
25.56249947	×ÔÉí³µÁ¾	Road 1	390.3328444	89.7252182	-0.000474906	0.345598727	0.121568628	0	412.025	985.6904	645.5338	2.3118	2.1192	1495	1.54568018	0.003570521	53.04052926	0.122523623
25.57918401	×ÔÉí³µÁ¾	Road 1	390.748732	89.73550415	-0.000511473	0.345104039	0.121568628	0	412.3745	985.6875	645.5158	2.3211	2.1099	1496	1.476003125	0.003409567	53.06515569	0.12258051
25.59582273	×ÔÉí³µÁ¾	Road 1	391.1635491	89.75100174	-0.000548642	0.343901664	0.121568628	0	412.8986	985.6826	645.4889	2.3355	2.0955	1497	1.720432416	0.003974199	53.09378148	0.122646635
25.61247574	×ÔÉí³µÁ¾	Road 1	391.5787698	89.76120529	-0.000584365	0.34295702	0.121568628	0	413.2481	985.6797	645.4709	2.3448	2.0862	1498	1.473407451	0.003403571	53.11831815	0.122703315
25.62917714	×ÔÉí³µÁ¾	Road 1	391.9952474	89.77210236	-0.00062294	0.342902452	0.129411772	0	413.6226	985.6768	645.4517	2.3545	2.0765	1499	1.504383878	0.003475127	53.14344346	0.122761354
25.64585434	×ÔÉí³µÁ¾	Road 1	392.4111892	89.78663864	-0.000652098	0.343260407	0.129411772	0	414.122	985.6719	645.4259	2.3685	2.0625	1500	1.674609939	0.003868349	53.17137128	0.122825868
25.66251249	×ÔÉí³µÁ¾	Road 1	392.8267055	89.79745331	-0.000686418	0.343460202	0.129411772	0	414.3468	985.6699	645.4067	2.3782	2.0528	1501	1.502200565	0.003470083	53.19639515	0.122883673
25.68069037	×ÔÉí³µÁ¾	Road 1	393.2802081	89.8129303	-0.000727092	0.344858855	0.137254909	0	415.0212	985.6641	645.3796	2.3926	2.0384	1502	1.659326071	0.003833043	53.22655819	0.122953349
25.69581961	×ÔÉí³µÁ¾	Road 1	393.6576925	89.82235107	-0.000766271	0.345523208	0.137254909	0	415.3459	985.6611	645.3629	2.4014	2.0295	1503	1.481948883	0.003423302	53.24897895	0.123005141
25.71247336	×ÔÉí³µÁ¾	Road 1	394.073263	89.83287048	-0.000818793	0.345878333	0.137254909	0	415.6957	985.6582	645.345	2.4107	2.0203	1504	1.489045715	0.003439696	53.27377714	0.123062425
25.72909484	×ÔÉí³µÁ¾	Road 1	394.4881027	89.84893799	-0.000873662	0.347576499	0.137254909	0	416.2455	985.6533	645.3167	2.4256	2.0054	1505	1.749350931	0.004041001	53.30285395	0.123129593
25.74576765	×ÔÉí³µÁ¾	Road 1	394.904269	89.85881195	-0.000946729	0.347047031	0.145098045	0	416.5704	985.6504	645.2999	2.4344	1.9966	1506	1.458769237	0.003369757	53.32717573	0.123185776
25.76240344	×ÔÉí³µÁ¾	Road 1	395.3195588	89.86911163	-0.001036836	0.348115385	0.145098045	0	416.9203	985.6475	645.282	2.4437	1.9873	1507	1.479798237	0.003418334	53.35179334	0.123242643
25.7792104	×ÔÉí³µÁ¾	Road 1	395.7391947	89.88471909	-0.001169691	0.350028515	0.145098045	0	417.4453	985.6436	645.255	2.4571	1.9739	1508	1.720383348	0.003974086	53.38070776	0.123309435
25.79582383	×ÔÉí³µÁ¾	Road 1	396.1540516	89.8962616	-0.001320035	0.35126248	0.152941182	0	417.8203	985.6396	645.2357	2.4679	1.9632	1509	1.538912396	0.003554888	53.40627437	0.123368494
25.81242662	×ÔÉí³µÁ¾	Road 1	396.568691	89.90665741	-0.001494677	0.352985948	0.152941182	0	418.1703	985.6367	645.2177	2.4771	1.9539	1510	1.485745092	0.003432071	53.43094189	0.123425476
25.82912619	×ÔÉí³µÁ¾	Road 1	396.9858257	89.92360382	-0.001721943	0.354863912	0.152941182	0	418.7205	985.6318	645.1893	2.492	1.9391	1511	1.787936094	0.004130132	53.46079964	0.123494447
25.84607721	×ÔÉí³µÁ¾	Road 1	397.4092929	89.93451462	-0.001942505	0.355864137	0.152941182	0	419.0707	985.6289	645.1713	2.5013	1.9298	1512	1.499725178	0.003464365	53.48622152	0.123553172
25.86251102	×ÔÉí³µÁ¾	Road 1	397.8199131	89.95067825	-0.002190392	0.357777268	0.160784319	0	419.596	985.625	645.1443	2.5148	1.9164	1513	1.764119348	0.004075116	53.51521272	0.123620141
25.8958416	×ÔÉí³µÁ¾	Road 1	398.6529306	89.97331009	-0.002493708	0.360530972	0.160784319	0	420.3217	985.6182	645.1069	2.5357	1.8965	1514	1.527689122	0.003528962	53.56613149	0.123737764
25.91312216	×ÔÉí³µÁ¾	Road 1	399.0848734	89.98520279	-0.002800096	0.362607181	0.168627456	0	420.6971	985.6152	645.0876	2.5455	1.8868	1515	1.535038159	0.003545938	53.59265781	0.12379904
25.92911977	×ÔÉí³µÁ¾	Road 1	399.4848234	90.00218353	-0.003581732	0.36372292	0.168627456	0	421.2227	985.6113	645.0607	2.5589	1.8734	1516	1.825535252	0.004216986	53.62186201	0.123866501
25.94586589	×ÔÉí³µÁ¾	Road 1	399.9035421	90.0141449	-0.004032347	0.366026491	0.168627456	0	421.5982	985.6084	645.0413	2.5687	1.8637	1517	1.555709098	0.003593688	53.64791409	0.123926682
25.96252513	×ÔÉí³µÁ¾	Road 1	400.3201418	90.02561874	-0.004529273	0.367436618	0.168627456	0	421.9488	985.6055	645.0233	2.578	1.8544	1518	1.536002337	0.003548165	53.67350273	0.123985791
25.97912939	×ÔÉí³µÁ¾	Road 1	400.7354406	90.04169312	-0.005116913	0.367566615	0.168627456	0	422.2993	985.6025	645.0052	2.5873	1.8451	1519	1.75356253	0.004050729	53.70261934	0.124053051
25.99577984	×ÔÉí³µÁ¾	Road 1	401.151952	90.0541008	-0.005677212	0.369482934	0.168627456	0	422.8253	985.5986	644.9782	2.6007	1.8317	1520	1.580318563	0.003650536	53.72893235	0.124113834
26.01248124	×ÔÉí³µÁ¾	Road 1	401.5697912	90.06558838	-0.006255204	0.369780302	0.168627456	0	423.176	985.5957	644.9602	2.61	1.8225	1521	1.535838079	0.003547786	53.75458299	0.124173087
26.02916394	×ÔÉí³µÁ¾	Road 1	401.9872468	90.08372955	-0.006977587	0.37037167	0.168627456	0	423.7271	985.5908	644.9318	2.6259	1.8086	1522	1.847127159	0.004266864	53.78539807	0.12424427
26.04580852	×ÔÉí³µÁ¾	Road 1	402.4038024	90.09538879	-0.007689169	0.370733112	0.168627456	0	424.0779	985.5889	644.9138	2.6342	1.8003	1523	1.546103906	0.0035715	53.81113232	0.124303716
26.06251395	×ÔÉí³µÁ¾	Road 1	402.8219614	90.11276093	-0.008504647	0.370843828	0.168627456	0	424.6042	985.585	644.8867	2.6477	1.7869	1524	1.810630651	0.004182557	53.84137968	0.124373587
26.07907423	×ÔÉí³µÁ¾	Road 1	403.2365397	90.12422791	-0.00952315	0.371579885	0.160784319	0	424.9552	985.582	644.8687	2.657	1.7776	1525	1.540238987	0.003557952	53.86688646	0.124432508
26.0958669	×ÔÉí³µÁ¾	Road 1	403.6569899	90.13580475	-0.010518473	0.370243758	0.160784319	0	425.3061	985.5801	644.8506	2.6653	1.7693	1526	1.53802977	0.003552849	53.89271409	0.12449217
26.11245466	×ÔÉí³µÁ¾	Road 1	404.0723892	90.15303955	-0.011566783	0.36881876	0.160784319	0	425.8326	985.5762	644.8236	2.6798	1.7559	1527	1.810603538	0.004182494	53.92274796	0.124561548
26.12916596	×ÔÉí³µÁ¾	Road 1	404.4909426	90.16609955	-0.012817441	0.367766678	0.160784319	0	426.2339	985.5732	644.8029	2.69	1.7457	1528	1.610208528	0.003719582	53.94965663	0.124623707
26.14580247	×ÔÉí³µÁ¾	Road 1	404.9076759	90.1775116	-0.013952543	0.367577374	0.160784319	0	426.585	985.5713	644.7849	2.6993	1.7374	1529	1.535926506	0.00354799	53.9752091	0.124682733
26.16251304	×ÔÉí³µÁ¾	Road 1	405.3263436	90.19467773	-0.015180805	0.366185486	0.160784319	0	427.1118	985.5684	644.7578	2.7118	1.725	1530	1.802148372	0.004162963	54.00532401	0.124752298
26.17915212	×ÔÉí³µÁ¾	Road 1	405.7432722	90.20587692	-0.016681517	0.365391582	0.160784319	0	427.463	985.5664	644.7397	2.7211	1.7167	1531	1.52626137	0.003525664	54.0307196	0.124810962
26.19582603	×ÔÉí³µÁ¾	Road 1	406.1611256	90.21714478	-0.018081781	0.36413011	0.160784319	0	427.8143	985.5645	644.7217	2.7294	1.7083	1532	1.528528962	0.003530902	54.05620615	0.124869836
26.21242955	×ÔÉí³µÁ¾	Road 1	406.5772716	90.2293602	-0.019485272	0.362553239	0.160784319	0	428.1907	985.5625	644.7024	2.7392	1.7005	1533	1.575424232	0.00363923	54.08236375	0.12493026
26.22908806	×ÔÉí³µÁ¾	Road 1	406.9948759	90.24667053	-0.021078113	0.362119704	0.160784319	0	428.7429	985.5605	644.674	2.7521	1.6885	1534	1.812267008	0.004186337	54.11255341	0.124999998
26.24574291	×ÔÉí³µÁ¾	Road 1	407.41244	90.25787659	-0.022477245	0.360448003	0.160784319	0	429.0944	985.5586	644.6559	2.7605	1.6802	1535	1.526792997	0.003526892	54.13798192	0.125058738
26.26250662	×ÔÉí³µÁ¾	Road 1	407.8327893	90.26983109	-0.023800345	0.358913571	0.160784319	0	429.4709	985.5576	644.6366	2.7693	1.6724	1536	1.558371769	0.003599839	54.16410601	0.125119085
26.27911455	×ÔÉí³µÁ¾	Road 1	408.2493082	90.28629684	-0.025260979	0.358018667	0.160784319	0	429.9983	985.5557	644.6095	2.7818	1.6608	1537	1.775729068	0.004101934	54.19359719	0.12518721
26.29581668	×ÔÉí³µÁ¾	Road 1	408.6682405	90.29722137	-0.026657443	0.356268942	0.160784319	0	430.3499	985.5547	644.5914	2.7901	1.6544	1538	1.512689801	0.003494313	54.21886233	0.125245572
26.3124268	×ÔÉí³µÁ¾	Road 1	409.0849401	90.31351547	-0.028036799	0.355336338	0.160784319	0	430.8773	985.5537	644.5643	2.8016	1.6439	1539	1.768006856	0.004084096	54.24822915	0.125313409
26.32994086	×ÔÉí³µÁ¾	Road 1	409.5243806	90.32664413	-0.029585373	0.354107469	0.160784319	0	431.3044	985.5537	644.5424	2.8113	1.6361	1540	1.587641981	0.003667453	54.27603519	0.125377641
26.37923826	×ÔÉí³µÁ¾	Road 1	410.7617001	90.35669174	-0.030891538	0.353641421	0.168627456	0	432.2845	985.5527	644.4921	2.833	1.6183	1541	1.47864279	0.003415665	54.34892844	0.125546025
26.39574758	×ÔÉí³µÁ¾	Road 1	411.1761363	90.37138596	-0.03229126	0.353405476	0.168627456	0	432.762	985.5537	644.4677	2.8427	1.6106	1542	1.697954104	0.003922274	54.37696052	0.125610779
26.41250103	×ÔÉí³µÁ¾	Road 1	411.5967839	90.38921814	-0.035443012	0.350596339	0.168627456	0	433.3402	985.5547	644.438	2.8541	1.602	1543	1.834383411	0.004237426	54.40769276	0.12568177
26.4290723	×ÔÉí³µÁ¾	Road 1	412.0129064	90.39988861	-0.036450148	0.348978043	0.168627456	0	433.6922	985.5557	644.4199	2.8605	1.5966	1544	1.506127725	0.003479155	54.43265121	0.125739424
26.44584078	×ÔÉí³µÁ¾	Road 1	412.43403	90.41041489	-0.037302155	0.348535091	0.168627456	0	434.0443	985.5566	644.4019	2.8679	1.5921	1545	1.493633718	0.003450294	54.45769718	0.12579728
26.46242011	×ÔÉí³µÁ¾	Road 1	412.8504813	90.42732697	-0.038074009	0.347731262	0.168627456	0	434.5975	985.5586	644.3735	2.8779	1.584	1546	1.800403811	0.004158933	54.48754667	0.125866233
26.47911088	×ÔÉí³µÁ¾	Road 1	413.2697809	90.43792877	-0.038793448	0.347295821	0.168627456	0	434.9497	985.5605	644.3555	2.8843	1.5806	1547	1.499817503	0.003464578	54.51257978	0.125924059
26.49573933	×ÔÉí³µÁ¾	Road 1	413.687564	90.44853745	-0.039267499	0.346168816	0.168627456	0	435.3019	985.5615	644.3375	2.8917	1.5751	1548	1.502141485	0.003469947	54.53755807	0.125981759
26.5124345	×ÔÉí³µÁ¾	Road 1	414.1070769	90.46008682	-0.039596301	0.346112162	0.168627456	0	435.6793	985.5645	644.3181	2.8975	1.5722	1549	1.544345376	0.003567438	54.56334117	0.126041318
26.52910218	×ÔÉí³µÁ¾	Road 1	414.5259582	90.47288589	-0.039702758	0.346615702	0.168627456	0	436.107	985.5674	644.2962	2.9043	1.5673	1550	1.604027593	0.003705304	54.59007658	0.126103077
26.54579661	×ÔÉí³µÁ¾	Road 1	414.9455722	90.48588409	-0.039702758	0.345520079	0.168627456	0	436.5349	985.5703	644.2743	2.9121	1.5634	1551	1.612578444	0.003725056	54.61699767	0.126165265
26.56246758	×ÔÉí³µÁ¾	Road 1	415.364653	90.49805832	-0.039702758	0.34638384	0.168627456	0	436.9376	985.5742	644.2537	2.9174	1.56	1552	1.574962296	0.003638163	54.64325382	0.126225916
26.57906011	×ÔÉí³µÁ¾	Road 1	415.781847	90.51654282	-0.039702758	0.345977753	0.168627456	0	437.5417	985.5801	644.2225	2.9264	1.5559	1553	1.875365563	0.004332094	54.67437088	0.126297797
26.59581283	×ÔÉí³µÁ¾	Road 1	416.2030945	90.52209778	-0.039702758	0.346680969	0.168627456	0	437.7431	985.582	644.2122	2.9291	1.5551	1554	1.263448946	0.002918567	54.69553708	0.126346691
26.61239986	×ÔÉí³µÁ¾	Road 1	416.6202417	90.53638	-0.039702758	0.345739305	0.168627456	0	438.1964	985.5869	644.1893	2.9354	1.5518	1555	1.677813783	0.00387575	54.72336703	0.126410978
26.6290756	×ÔÉí³µÁ¾	Road 1	417.039705	90.55478897	-0.039702758	0.34596926	0.168627456	0	438.8008	985.5938	644.1584	2.9434	1.5486	1556	1.868137715	0.004315398	54.75451961	0.12648294
26.64591812	×ÔÉí³µÁ¾	Road 1	417.463418	90.56640701	-0.039734732	0.344377995	0.168627456	0	439.1786	985.5986	644.139	2.9473	1.5476	1557	1.544261623	0.003567244	54.78052887	0.126543022
26.6624806	×ÔÉí³µÁ¾	Road 1	417.8801346	90.57705002	-0.03978806	0.345162481	0.168627456	0	439.5312	985.6035	644.121	2.9518	1.546	1558	1.507461283	0.003482236	54.80549616	0.126600696
26.67905187	×ÔÉí³µÁ¾	Road 1	418.2971216	90.58768616	-0.040001847	0.344750971	0.168627456	0	439.8839	985.6084	644.103	2.9552	1.5455	1559	1.50701168	0.003481197	54.83046926	0.126658384
26.69691085	×ÔÉí³µÁ¾	Road 1	418.7465936	90.60422745	-0.040388595	0.344259083	0.168627456	0	440.4382	985.6172	644.0746	2.9604	1.5451	1560	1.729860676	0.003995978	54.86136281	0.126729748
26.71241947	×ÔÉí³µÁ¾	Road 1	419.1369582	90.61489105	-0.041082289	0.342903763	0.168627456	0	440.791	985.623	644.0567	2.9629	1.5446	1561	1.5431983	0.003564788	54.88529569	0.126785033
26.72912783	×ÔÉí³µÁ¾	Road 1	419.5575947	90.63075256	-0.041839026	0.341436207	0.168627456	0	441.3203	985.6328	644.0297	2.9666	1.5457	1562	1.748372137	0.00403874	54.91450812	0.126852514
26.7458197	×ÔÉí³µÁ¾	Road 1	419.9778682	90.64202042	-0.042705592	0.340196759	0.168627456	0	441.6984	985.6396	644.0104	2.9685	1.5466	1563	1.533745272	0.003542952	54.9401092	0.126911652
26.762417	×ÔÉí³µÁ¾	Road 1	420.3958082	90.6523613	-0.043708883	0.338626057	0.168627456	0	442.0513	985.6465	643.9923	2.971	1.548	1564	1.493150074	0.003449177	54.96489145	0.126968899
26.77912683	×ÔÉí³µÁ¾	Road 1	420.816654	90.66790009	-0.044901036	0.336635232	0.168627456	0	442.5807	985.6572	643.9654	2.9727	1.5501	1565	1.733770177	0.004005009	54.99386245	0.127035822
26.79581246	×ÔÉí³µÁ¾	Road 1	421.2369415	90.67888641	-0.046032306	0.335021466	0.168627456	0	442.959	985.665	643.946	2.9747	1.551	1566	1.521224377	0.003514028	55.01924505	0.127094456
26.81240426	×ÔÉí³µÁ¾	Road 1	421.6549124	90.68909683	-0.047086846	0.332960486	0.168627456	0	443.312	985.6729	643.928	2.9761	1.5534	1567	1.487633543	0.003436433	55.04392756	0.127151473
26.82908953	×ÔÉí³µÁ¾	Road 1	422.0752838	90.69899826	-0.048133139	0.331564277	0.168627456	0	443.665	985.6807	643.9101	2.9766	1.5547	1568	1.470547455	0.003396965	55.06846405	0.127208152
26.8457704	×ÔÉí³µÁ¾	Road 1	422.4956208	90.71547089	-0.048912641	0.330076188	0.168627456	0	444.2452	985.6953	643.8805	2.9744	1.5582	1569	1.77966833	0.004111034	55.09815046	0.127276728
26.8624663	×ÔÉí³µÁ¾	Road 1	422.9163828	90.72547531	-0.049638659	0.328601807	0.168627456	0	444.5983	985.7041	643.8625	2.971	1.5576	1570	1.475429202	0.003408241	55.12278408	0.127333631
26.87909842	×ÔÉí³µÁ¾	Road 1	423.3355832	90.73535614	-0.050184749	0.328067333	0.168627456	0	444.9515	985.7129	643.8445	2.9676	1.5581	1571	1.471532562	0.00339924	55.14725878	0.127390168
26.89578662	×ÔÉí³µÁ¾	Road 1	423.7562595	90.74882813	-0.050596934	0.326126367	0.168627456	0	445.3552	985.7246	643.824	2.9632	1.5585	1572	1.638882729	0.003785819	55.17460879	0.127453346
26.91245759	×ÔÉí³µÁ¾	Road 1	424.1765437	90.75793991	-0.05083527	0.326587588	0.168627456	0	445.7589	985.7363	643.8034	2.9577	1.5609	1573	1.434560447	0.003313835	55.19852431	0.127508591
26.92905416	×ÔÉí³µÁ¾	Road 1	424.5950076	90.77000427	-0.050885543	0.326015055	0.168627456	0	446.1879	985.749	643.7816	2.9518	1.5619	1574	1.576169875	0.003640952	55.22468331	0.127569018
26.94571193	×ÔÉí³µÁ¾	Road 1	425.0150935	90.78696442	-0.050885543	0.325797439	0.168627456	0	446.7936	985.7676	643.7507	2.9432	1.5655	1575	1.804866332	0.004169241	55.25474837	0.127638469
26.96241993	×ÔÉí³µÁ¾	Road 1	425.4364687	90.79189453	-0.050885543	0.326191366	0.168627456	0	446.9703	985.7734	643.7418	2.9405	1.5662	1576	1.237675161	0.00285903	55.27542745	0.127686237
26.97907331	×ÔÉí³µÁ¾	Road 1	425.8565286	90.80533905	-0.050885543	0.325265348	0.168627456	0	447.4499	985.7891	643.7174	2.9326	1.5702	1577	1.63974703	0.003787816	55.30273477	0.127749317
26.99576408	×ÔÉí³µÁ¾	Road 1	426.2776115	90.82257385	-0.050885543	0.324950606	0.168627456	0	448.0557	985.8096	643.6866	2.922	1.5748	1578	1.816790662	0.004196786	55.33305841	0.127819365
27.01237164	×ÔÉí³µÁ¾	Road 1	426.6966168	90.82726364	-0.050885543	0.324531019	0.168627456	0	448.2325	985.8164	643.6777	2.9173	1.5764	1579	1.228083136	0.002836872	55.35345387	0.127866478
27.02902612	×ÔÉí³µÁ¾	Road 1	427.1168688	90.84085236	-0.050885543	0.324996501	0.168627456	0	448.7122	985.833	643.6533	2.9084	1.5804	1580	1.647025124	0.003804628	55.38088421	0.127929843
27.04571285	×ÔÉí³µÁ¾	Road 1	427.5379901	90.85281372	-0.050797589	0.324620485	0.168627456	0	449.1414	985.8496	643.6315	2.8996	1.5862	1581	1.569404582	0.003625325	55.40707245	0.127990337
27.06239409	×ÔÉí³µÁ¾	Road 1	427.9590458	90.86858597	-0.050797589	0.325864881	0.168627456	0	449.7223	985.8721	643.602	2.8857	1.5932	1582	1.749183796	0.004040615	55.436251	0.12805774
27.07907606	×ÔÉí³µÁ¾	Road 1	428.3801683	90.87900925	-0.050785031	0.324895233	0.168627456	0	450.0758	985.8857	643.584	2.8785	1.5975	1583	1.497528434	0.003459291	55.46123273	0.128115448
27.09578699	×ÔÉí³µÁ¾	Road 1	428.8020718	90.88977585	-0.050734825	0.324270427	0.168627456	0	450.4547	985.9014	643.5648	2.8693	1.6033	1584	1.512955291	0.003494927	55.48651562	0.128173851
27.11244806	×ÔÉí³µÁ¾	Road 1	429.2227622	90.89962234	-0.050672118	0.323772371	0.168627456	0	450.8083	985.916	643.5469	2.8601	1.6086	1585	1.471223905	0.003398527	55.51102779	0.128230474
27.14578085	×ÔÉí³µÁ¾	Road 1	430.0645806	90.91788712	-0.050484296	0.324461788	0.168627456	0	451.4651	985.9453	643.5137	2.8416	1.6201	1586	1.437627438	0.003320919	55.55894791	0.12834117
27.16238364	×ÔÉí³µÁ¾	Road 1	430.4839851	90.9398735	-0.050172292	0.324373215	0.168627456	0	452.2484	985.9805	643.474	2.8186	1.6343	1587	2.047919154	0.004730693	55.59294909	0.128419712
27.17908357	×ÔÉí³µÁ¾	Road 1	430.9058904	90.95002213	-0.048655946	0.326248199	0.168627456	0	452.6021	985.9971	643.4561	2.8083	1.6415	1588	1.485010621	0.003430375	55.61774867	0.128476999
27.19577691	×ÔÉí³µÁ¾	Road 1	431.3276984	90.96497726	-0.047662217	0.327082038	0.168627456	0	453.1328	986.0225	643.4292	2.7915	1.6533	1589	1.71171008	0.00395405	55.64632282	0.128543006
27.21240133	×ÔÉí³µÁ¾	Road 1	431.7478119	90.97512589	-0.046456944	0.328606486	0.168627456	0	453.4866	986.04	643.4113	2.7793	1.6616	1590	1.487507738	0.003436143	55.67105177	0.12860013
27.22906497	×ÔÉí³µÁ¾	Road 1	432.1689636	90.98526764	-0.044947315	0.330238849	0.168627456	0	453.8405	986.0576	643.3934	2.7671	1.6698	1591	1.486186427	0.003433091	55.69581705	0.128657337
27.24574841	×ÔÉí³µÁ¾	Road 1	432.5906872	91.0007309	-0.043335065	0.332839072	0.168627456	0	454.3712	986.084	643.3666	2.7493	1.6819	1592	1.736630605	0.004011617	55.72479002	0.128724265
27.26246373	×ÔÉí³µÁ¾	Road 1	433.0132652	91.01113358	-0.04150888	0.3351731	0.168627456	0	454.7252	986.1025	643.3486	2.7371	1.691	1593	1.497319703	0.003458809	55.74981821	0.12878208
27.27910868	×ÔÉí³µÁ¾	Road 1	433.4341114	91.02139893	-0.039056335	0.337936908	0.168627456	0	455.0791	986.1211	643.3308	2.724	1.7002	1594	1.493035378	0.003448912	55.7746697	0.128839487
27.29570305	×ÔÉí³µÁ¾	Road 1	433.8537556	91.03809128	-0.036581151	0.341278583	0.168627456	0	455.6353	986.1514	643.3027	2.7027	1.7164	1595	1.799396137	0.004156605	55.80452954	0.128908463
27.31236595	×ÔÉí³µÁ¾	Road 1	434.2751859	91.04946899	-0.03403943	0.343405038	0.168627456	0	456.0146	986.1719	643.2836	2.6881	1.7271	1596	1.54540157	0.003569878	55.83028042	0.128967948
27.32907468	×ÔÉí³µÁ¾	Road 1	434.6978299	91.06127243	-0.031108372	0.345910817	0.168627456	0	456.3939	986.1934	643.2644	2.6724	1.7387	1597	1.564137649	0.003613158	55.85641518	0.129028319
27.34571303	×ÔÉí³µÁ¾	Road 1	435.1187673	91.07722321	-0.02852973	0.349154174	0.168627456	0	456.925	986.2227	643.2375	2.6518	1.7534	1598	1.762873292	0.004072237	55.88574648	0.129096074
27.36243496	×ÔÉí³µÁ¾	Road 1	435.5418706	91.08830566	-0.026105734	0.35082975	0.168627456	0	457.2791	986.2432	643.2197	2.6377	1.7655	1599	1.530138449	0.00353462	55.91133334	0.12915518
27.37908284	×ÔÉí³µÁ¾	Road 1	435.9631504	91.09912033	-0.023581337	0.352781743	0.168627456	0	457.6332	986.2637	643.2018	2.6226	1.7767	1600	1.519942695	0.003511068	55.93663716	0.129213632
27.39571716	×ÔÉí³µÁ¾	Road 1	436.3841638	91.11575775	-0.021549653	0.353829265	0.168627456	0	458.1644	986.2939	643.175	2.601	1.7933	1601	1.796173208	0.00414916	55.96651528	0.12928265
27.41242405	×ÔÉí³µÁ¾	Road 1	436.8070687	91.12747879	-0.01965148	0.354663521	0.168627456	0	458.5439	986.3164	643.1558	2.5854	1.8069	1602	1.561234286	0.003606451	55.99259866	0.129342903
27.42903271	×ÔÉí³µÁ¾	Road 1	437.2275379	91.13855438	-0.017774483	0.356025308	0.168627456	0	458.8982	986.3379	643.1379	2.5694	1.82	1603	1.534051103	0.003543658	56.01807719	0.129401758
27.44568976	×ÔÉí³µÁ¾	Road 1	437.6493082	91.15501328	-0.016237227	0.356739461	0.168627456	0	459.4296	986.3691	643.1111	2.5468	1.8376	1604	1.787301374	0.004128666	56.04784835	0.12947053
27.46248903	×ÔÉí³µÁ¾	Road 1	438.0747351	91.16687164	-0.014829914	0.356350899	0.168627456	0	459.8092	986.3926	643.092	2.5303	1.8522	1605	1.565180132	0.003615566	56.07414223	0.129531269
27.47903317	×ÔÉí³µÁ¾	Road 1	438.493752	91.1779335	-0.01339245	0.357172519	0.168627456	0	460.1636	986.4141	643.0742	2.5142	1.8653	1606	1.535979225	0.003548112	56.09955369	0.129589969
27.49703768	×ÔÉí³µÁ¾	Road 1	438.9498458	91.19594421	-0.01222509	0.3575297	0.168627456	0	460.7458	986.4492	643.0448	2.4896	1.8869	1607	1.797608722	0.004152476	56.13191875	0.129664732
27.51235423	×ÔÉí³µÁ¾	Road 1	439.3378947	91.20697174	-0.011136745	0.357237369	0.168627456	0	461.1003	986.4707	643.027	2.4736	1.9	1608	1.576843319	0.003642508	56.15607055	0.129720523
27.52899844	×ÔÉí³µÁ¾	Road 1	439.759631	91.21790314	-0.010025333	0.358027965	0.168627456	0	461.4548	986.4932	643.0091	2.4576	1.915	1609	1.527174063	0.003527772	56.18148916	0.12977924
27.5457156	×ÔÉí³µÁ¾	Road 1	440.1832921	91.2344101	-0.009117707	0.357581854	0.168627456	0	461.9866	986.5264	642.9823	2.434	1.9366	1610	1.788062134	0.004130424	56.21138048	0.129848289
27.56237338	×ÔÉí³µÁ¾	Road 1	440.6054953	91.24454498	-0.008270327	0.358183205	0.168627456	0	462.1638	986.5371	642.9734	2.4255	1.9431	1611	1.489410691	0.003440539	56.23619075	0.129905601
27.57908357	×ÔÉí³µÁ¾	Road 1	441.029074	91.25466614	-0.007389968	0.357973665	0.168627456	0	462.6451	986.5674	642.9491	2.404	1.9627	1612	1.487389574	0.00343587	56.26104532	0.129963015
27.59574538	×ÔÉí³µÁ¾	Road 1	441.451484	91.26715622	-0.006674519	0.358535796	0.168627456	0	463.0504	986.5938	642.9287	2.385	1.9807	1613	1.601064516	0.003698459	56.28772196	0.130024638
27.61236797	×ÔÉí³µÁ¾	Road 1	441.8729834	91.28529739	-0.005982635	0.358591259	0.168627456	0	463.6331	986.6309	642.8993	2.3575	2.0053	1614	1.870866509	0.004321702	56.3188206	0.130096476
27.62910309	×ÔÉí³µÁ¾	Road 1	442.2973866	91.29610519	-0.005190668	0.358488798	0.168627456	0	463.9879	986.6533	642.8815	2.3415	2.0203	1615	1.519585311	0.003510242	56.34425104	0.13015522
27.6457715	×ÔÉí³µÁ¾	Road 1	442.7201736	91.31245422	-0.004491782	0.358149618	0.168627456	0	464.5201	986.6875	642.8546	2.3169	2.0438	1616	1.784138575	0.00412136	56.37398979	0.130223916
27.66242854	×ÔÉí³µÁ¾	Road 1	443.1427228	91.32335815	-0.00381599	0.358165771	0.168627456	0	464.8749	986.71	642.8367	2.3009	2.0598	1617	1.526892426	0.003527122	56.39942331	0.130282668
27.67905516	×ÔÉí³µÁ¾	Road 1	443.56455	91.33413849	-0.003109102	0.358487904	0.168627456	0	465.2298	986.7334	642.8188	2.2839	2.0758	1618	1.522115944	0.003516088	56.42473095	0.130341129
27.69570818	×ÔÉí³µÁ¾	Road 1	443.9871233	91.35067291	-0.002536036	0.357830673	0.168627456	0	465.7621	986.7676	642.7921	2.2585	2.0994	1619	1.794262762	0.004144747	56.45461083	0.130410151
27.71254264	×ÔÉí³µÁ¾	Road 1	444.414355	91.36224976	-0.002014647	0.358639628	0.168627456	0	466.1425	986.792	642.7729	2.241	2.1159	1620	1.553524616	0.003588642	56.48076358	0.130470564
27.72943721	×ÔÉí³µÁ¾	Road 1	444.8431644	91.37335281	-0.00151029	0.357756883	0.176470593	0	466.4975	986.8154	642.7551	2.224	2.1328	1621	1.529603031	0.003533383	56.50660557	0.130530259
27.74569581	×ÔÉí³µÁ¾	Road 1	445.2559051	91.38959198	-0.001151491	0.359209806	0.176470593	0	467.0301	986.8496	642.7282	2.1995	2.1564	1622	1.799580521	0.004157031	56.53586422	0.130597846
27.76239207	×ÔÉí³µÁ¾	Road 1	445.6798073	91.40055771	-0.000861171	0.360495567	0.176470593	0	467.3852	986.873	642.7103	2.1825	2.1733	1623	1.529638265	0.003533464	56.56140347	0.130656842
27.77906964	×ÔÉí³µÁ¾	Road 1	446.1032859	91.41156464	-0.000604428	0.361325473	0.176470593	0	467.7404	986.8965	642.6924	2.1655	2.1903	1624	1.532319145	0.003539657	56.58695883	0.130715875
27.79570066	×ÔÉí³µÁ¾	Road 1	446.5256589	91.42810593	-0.000420814	0.361675382	0.176470593	0	468.2732	986.9316	642.6656	2.14	2.2148	1625	1.79689293	0.004150823	56.61684299	0.130784907
27.81244568	×ÔÉí³µÁ¾	Road 1	446.9509788	91.43923645	-0.000280709	0.361425161	0.176470593	0	468.6285	986.9541	642.6477	2.124	2.2308	1626	1.536423617	0.003549139	56.64257044	0.130844338
27.8291764	×ÔÉí³µÁ¾	Road 1	447.3760121	91.45570221	-0.000168122	0.361978263	0.176470593	0	469.1615	986.9893	642.6209	2.0985	2.2563	1627	1.789093194	0.004132805	56.67250326	0.130913483
27.84574034	×ÔÉí³µÁ¾	Road 1	447.7968593	91.46677094	-9.85E-05	0.361959189	0.176470593	0	469.5168	987.0127	642.603	2.0816	2.2733	1628	1.539590806	0.003556455	56.69800495	0.130972391
27.86238492	×ÔÉí³µÁ¾	Road 1	448.2198072	91.47794952	-5.27E-05	0.362898558	0.176470593	0	469.8723	987.0361	642.5851	2.0646	2.2893	1629	1.542400396	0.003562945	56.72367755	0.131031695
27.87903427	×ÔÉí³µÁ¾	Road 1	448.6429561	91.49525986	-2.31E-05	0.362673938	0.176470593	0	470.4308	987.0732	642.557	2.0376	2.3163	1630	1.833642936	0.004235715	56.75420651	0.131102217
27.89569975	×ÔÉí³µÁ¾	Road 1	449.0665669	91.50647278	-9.77E-06	0.362804413	0.176470593	0	470.7863	987.0957	642.5391	2.0207	2.3323	1631	1.543750891	0.003566065	56.77993385	0.131161647
27.91245356	×ÔÉí³µÁ¾	Road 1	449.4924744	91.51747971	-3.61E-06	0.362961769	0.176470593	0	471.1419	987.1191	642.5212	2.0037	2.3493	1632	1.531371745	0.003537469	56.80559017	0.131220913
27.9290274	×ÔÉí³µÁ¾	Road 1	449.9138837	91.53422699	-1.02E-06	0.362494797	0.176470593	0	471.6754	987.1543	642.4944	1.9782	2.3748	1633	1.811174597	0.004183813	56.83560829	0.131290255
27.94568847	×ÔÉí³µÁ¾	Road 1	450.337562	91.54522018	-2.81E-07	0.362808853	0.176470593	0	472.031	987.1777	642.4764	1.9612	2.3918	1634	1.533985887	0.003543507	56.86116614	0.131349294
27.96239537	×ÔÉí³µÁ¾	Road 1	450.762457	91.55632324	-7.55E-08	0.362790912	0.176470593	0	472.3867	987.2012	642.4585	1.9443	2.4088	1635	1.537906283	0.003552564	56.88685978	0.131408646
27.97899413	×ÔÉí³µÁ¾	Road 1	451.1846573	91.56835327	-3.63E-08	0.363335013	0.176470593	0	472.7679	987.2266	642.4393	1.9258	2.4273	1636	1.58568174	0.003662925	56.91318014	0.131469446
27.99570763	×ÔÉí³µÁ¾	Road 1	451.6098596	91.58637085	-3.63E-08	0.362425566	0.176470593	0	473.3524	987.2646	642.4099	1.8983	2.4549	1637	1.865498093	0.004309301	56.94435913	0.13154147
28.01236431	×ÔÉí³µÁ¾	Road 1	452.033668	91.59750137	-3.63E-08	0.36365366	0.176470593	0	473.7083	987.2881	642.392	1.8814	2.4719	1638	1.541354119	0.003560528	56.97003297	0.131600776
28.02898653	×ÔÉí³µÁ¾	Road 1	452.4566519	91.60882416	-3.63E-08	0.362672776	0.176470593	0	474.0642	987.3115	642.374	1.8644	2.4889	1639	1.551759977	0.003584566	56.99582667	0.13166036
28.04607757	×ÔÉí³µÁ¾	Road 1	452.8916484	91.62616882	-3.63E-08	0.363292307	0.176470593	0	474.6236	987.3486	642.3459	1.8375	2.5159	1640	1.816153197	0.004195314	57.02686663	0.131732062
28.06240179	×ÔÉí³µÁ¾	Road 1	453.3071774	91.63716202	-3.63E-08	0.363442123	0.176470593	0	474.9796	987.3721	642.328	1.8205	2.5329	1641	1.546007349	0.003571277	57.05210398	0.13179036
28.07907569	×ÔÉí³µÁ¾	Road 1	453.7316597	91.64837494	-3.63E-08	0.362697452	0.176470593	0	475.3357	987.3955	642.3101	1.8035	2.5499	1642	1.545410239	0.003569898	57.077872	0.131849884
28.09567042	×ÔÉí³µÁ¾	Road 1	454.1542068	91.6658226	-3.63E-08	0.363048494	0.176470593	0	475.8953	987.4326	642.2819	1.7766	2.5769	1643	1.845766883	0.004263722	57.108502	0.13192064
28.14576142	×ÔÉí³µÁ¾	Road 1	455.4300477	91.69366608	-3.63E-08	0.362655669	0.176470593	0	476.7859	987.4912	642.2371	1.7342	2.6194	1644	1.453575864	0.00335776	57.18131307	0.132088833
28.16238291	×ÔÉí³µÁ¾	Road 1	455.8535213	91.71890717	-3.63E-08	0.362346917	0.176470593	0	477.6003	987.5449	642.196	1.6953	2.6583	1645	2.216880928	0.005120995	57.21816093	0.132173952
28.1815384	×ÔÉí³µÁ¾	Road 1	456.3416132	91.72987976	-3.63E-08	0.362937987	0.176470593	0	477.9567	987.5684	642.1781	1.6783	2.6753	1646	1.46751534	0.00338996	57.24627191	0.132238888
28.19741908	×ÔÉí³µÁ¾	Road 1	456.7463354	91.74670944	-3.63E-08	0.361974269	0.176470593	0	478.4913	987.6035	642.1512	1.6529	2.7008	1647	1.853761999	0.00428219	57.27571091	0.132306892
28.21234195	×ÔÉí³µÁ¾	Road 1	457.1266963	91.75846481	-3.63E-08	0.362545401	0.176470593	0	478.8733	987.6289	642.132	1.6344	2.7193	1648	1.638296254	0.003784464	57.30015898	0.132363367
28.22900449	×ÔÉí³µÁ¾	Road 1	457.5514501	91.76952667	-3.63E-08	0.362484515	0.176470593	0	479.2299	987.6523	642.114	1.6175	2.7363	1649	1.540231229	0.003557934	57.32582315	0.132422651
28.24567583	×ÔÉí³µÁ¾	Road 1	457.9764794	91.78058167	-3.63E-08	0.362425148	0.176470593	0	479.5864	987.6758	642.0961	1.6005	2.7533	1650	1.539776147	0.003556883	57.35149329	0.132481949
28.26239482	×ÔÉí³µÁ¾	Road 1	458.4027901	91.79491882	-3.63E-08	0.362555385	0.184313729	0	479.9431	987.6992	642.0781	1.5836	2.7703	1651	1.694182551	0.003913562	57.37981831	0.13254738
28.27908632	×ÔÉí³µÁ¾	Road 1	458.8284732	91.81075287	-3.63E-08	0.362504452	0.184313729	0	480.5545	987.7393	642.0473	1.5546	2.7992	1652	1.766686062	0.004081045	57.40930695	0.132615499
28.29565576	×ÔÉí³µÁ¾	Road 1	459.2510947	91.82189026	-3.63E-08	0.36460647	0.184313729	0	480.9113	987.7627	642.0293	1.5377	2.8162	1653	1.547515683	0.003574761	57.43494842	0.132674731
28.31241141	×ÔÉí³µÁ¾	Road 1	459.6785426	91.83845215	-3.63E-08	0.365475267	0.184313729	0	481.4464	987.7979	642.0024	1.5123	2.8416	1654	1.798716202	0.004155034	57.46508707	0.132744351
28.32900174	×ÔÉí³µÁ¾	Road 1	460.1018256	91.84979553	-3.63E-08	0.366006315	0.184313729	0	481.8033	987.8223	641.9845	1.4943	2.8595	1655	1.557077478	0.003596849	57.4909195	0.132804024
28.34567235	×ÔÉí³µÁ¾	Road 1	460.5272091	91.86113205	-3.63E-08	0.365274191	0.184313729	0	482.1602	987.8457	641.9664	1.4774	2.8765	1656	1.554292095	0.003590415	57.5168305	0.132863878
28.36238364	×ÔÉí³µÁ¾	Road 1	460.9536825	91.87224884	-3.63E-08	0.366325647	0.184313729	0	482.5172	987.8691	641.9485	1.4604	2.8934	1657	1.542691429	0.003563617	57.54261087	0.132923431
28.37906671	×ÔÉí³µÁ¾	Road 1	461.3795251	91.89155731	-3.63E-08	0.366706759	0.184313729	0	483.1291	987.9092	641.9177	1.4315	2.9223	1658	1.93371088	0.004466872	57.5748711	0.132997952
28.42902282	×ÔÉí³µÁ¾	Road 1	462.6552134	91.93026352	-3.34E-08	0.3668966	0.184313729	0	484.3535	987.9902	641.8561	1.3727	2.9812	1659	1.630433915	0.003766302	57.65632123	0.133186102
28.44572788	×ÔÉí³µÁ¾	Road 1	463.0818494	91.94155884	-3.34E-08	0.367266387	0.184313729	0	484.7107	988.0137	641.838	1.3558	2.9981	1660	1.552316548	0.003585851	57.68225278	0.133246004
28.46241535	×ÔÉí³µÁ¾	Road 1	463.5081146	91.95850525	-7.63E-09	0.367216796	0.184313729	0	485.2466	988.0488	641.8111	1.3303	3.0235	1661	1.822193138	0.004209266	57.71266057	0.133316246
28.47898735	×ÔÉí³µÁ¾	Road 1	463.9314834	91.97002716	-1.22E-12	0.367086798	0.184313729	0	485.6039	988.0723	641.7931	1.3134	3.0405	1662	1.567885246	0.003621815	57.73864357	0.133376267
28.49567629	×ÔÉí³µÁ¾	Road 1	464.357917	91.98675385	8.36E-09	0.367016852	0.184313729	0	486.14	988.1074	641.7661	1.288	3.0659	1663	1.812125481	0.00418601	57.76888601	0.133446127
28.51234836	×ÔÉí³µÁ¾	Road 1	464.783972	91.99803543	1.15E-07	0.367407471	0.184313729	0	486.4974	988.1309	641.7481	1.271	3.0828	1664	1.553494694	0.003588573	57.79478599	0.133505956
28.52901017	×ÔÉí³µÁ¾	Road 1	465.2098175	92.00943375	6.07E-07	0.367146611	0.184313729	0	486.8549	988.1543	641.7301	1.254	3.0998	1665	1.559551369	0.003602564	57.82077094	0.133565981
28.54572513	×ÔÉí³µÁ¾	Road 1	465.6371039	92.02720413	2.55E-06	0.366615802	0.184313729	0	487.4167	988.1914	641.7018	1.2271	3.1266	1666	1.861199408	0.004299371	57.85188081	0.133637845
28.56233012	×ÔÉí³µÁ¾	Road 1	466.0616307	92.03837585	7.40E-06	0.367186904	0.184313729	0	487.7743	988.2148	641.6838	1.2101	3.1436	1667	1.550956599	0.00358271	57.87763444	0.133697336
28.57898937	×ÔÉí³µÁ¾	Road 1	466.4875974	92.04979477	2.14E-05	0.367370367	0.184313729	0	488.1319	988.2383	641.6658	1.1932	3.1605	1668	1.561171228	0.003606306	57.90364237	0.133757414
28.59564898	×ÔÉí³µÁ¾	Road 1	466.9136256	92.06107635	4.75E-05	0.366850615	0.184313729	0	488.4896	988.2627	641.6478	1.1752	3.1784	1669	1.554756379	0.003591487	57.929544	0.133817247
28.61235661	×ÔÉí³µÁ¾	Road 1	467.3409673	92.07949905	9.20E-05	0.367446899	0.184313729	0	489.0773	988.3008	641.6182	1.1477	3.2058	1670	1.893519974	0.004374031	57.96118023	0.133890326
28.6290646	×ÔÉí³µÁ¾	Road 1	467.7683714	92.0909111	0.000159624	0.366690069	0.184313729	0	489.4351	988.3242	641.6002	1.1308	3.2228	1671	1.559815926	0.003603175	57.98724163	0.133950528
28.69632253	×ÔÉí³µÁ¾	Road 1	469.4899526	92.14814301	0.000269097	0.366786838	0.184313729	0	491.2503	988.4443	641.5088	1.0444	3.3099	1672	1.694130041	0.00391344	58.1011853	0.134213738
28.74569544	×ÔÉí³µÁ¾	Road 1	470.7542775	92.18757706	0.00040108	0.366168916	0.184313729	0	492.5037	988.5264	641.4457	0.9851	3.3692	1673	1.653187387	0.003818863	58.18280798	0.134402286
28.76235212	×ÔÉí³µÁ¾	Road 1	471.1808676	92.19873505	0.001395234	0.366328299	0.184313729	0	492.8619	988.5498	641.4277	0.9681	3.3861	1674	1.550816092	0.003582385	58.20863942	0.134461957
28.77904215	×ÔÉí³µÁ¾	Road 1	471.6083647	92.21007843	0.002606485	0.365963072	0.184313729	0	493.2201	988.5732	641.4096	0.9511	3.403	1675	1.558753873	0.003600721	58.23465508	0.134522053
28.79573769	×ÔÉí³µÁ¾	Road 1	472.0360845	92.22774582	0.003070259	0.366212219	0.184313729	0	493.7832	988.6104	641.3813	0.9242	3.4299	1676	1.860671569	0.004298151	58.26571998	0.134593813
28.8123929	×ÔÉí³µÁ¾	Road 1	472.4628232	92.23895874	0.003560343	0.365676194	0.184313729	0	494.1415	988.6338	641.3632	0.9073	3.4468	1677	1.554037544	0.003589827	58.29160281	0.134653602
28.82892165	×ÔÉí³µÁ¾	Road 1	472.8863728	92.2500824	0.004123483	0.366177738	0.184313729	0	494.5	988.6582	641.3452	0.8893	3.4647	1678	1.553990093	0.003589717	58.31728832	0.134712936
28.84566043	×ÔÉí³µÁ¾	Road 1	473.3153827	92.26688461	0.00461756	0.366016805	0.184313729	0	495.0377	988.6934	641.3181	0.8639	3.4901	1679	1.817948087	0.00419946	58.34771856	0.13478323
28.86241315	×ÔÉí³µÁ¾	Road 1	473.7448019	92.27811813	0.005068134	0.36545524	0.184313729	0	495.3962	988.7168	641.3	0.8469	3.507	1680	1.552425831	0.003586104	58.37372591	0.134843307
28.87907239	×ÔÉí³µÁ¾	Road 1	474.1718848	92.29101334	0.005478534	0.365493476	0.184313729	0	495.806	988.7432	641.2794	0.828	3.5269	1681	1.635145575	0.003777186	58.4009662	0.134906232
28.89568179	×ÔÉí³µÁ¾	Road 1	474.5977668	92.30770569	0.005859779	0.36599201	0.184313729	0	496.344	988.7783	641.2523	0.8026	3.5523	1682	1.819581677	0.004203234	58.43118835	0.134976045
28.91244073	×ÔÉí³µÁ¾	Road 1	475.0275355	92.31889114	0.00615012	0.365430087	0.184313729	0	496.7026	988.8018	641.2343	0.7857	3.5692	1683	1.550492433	0.003581638	58.45717297	0.13503607
28.92906882	×ÔÉí³µÁ¾	Road 1	475.4540074	92.33166275	0.006370913	0.364937127	0.184313729	0	497.0614	988.8252	641.2162	0.7688	3.5861	1684	1.630960741	0.003767519	58.48429272	0.135098716
28.94563312	×ÔÉí³µÁ¾	Road 1	475.8788876	92.34124832	0.006497599	0.365248263	0.184313729	0	497.4202	988.8477	641.1981	0.7529	3.6021	1685	1.479985309	0.003418766	58.50880765	0.135155346
28.96232389	×ÔÉí³µÁ¾	Road 1	476.3070751	92.3549469	0.006513552	0.364973962	0.184313729	0	497.8559	988.876	641.1762	0.7325	3.6225	1686	1.67331451	0.003865357	58.53673656	0.135219861
28.97903519	×ÔÉí³µÁ¾	Road 1	476.7358516	92.36839828	0.006513552	0.365104795	0.184313729	0	498.2917	988.9043	641.1542	0.7122	3.6438	1687	1.660904003	0.003836688	58.56449241	0.135283977
28.99572449	×ÔÉí³µÁ¾	Road 1	477.1641485	92.38664932	0.006513552	0.364853978	0.184313729	0	498.8814	988.9424	641.1245	0.6848	3.6712	1688	1.891591962	0.004369577	58.59606176	0.135356903
29.01231812	×ÔÉí³µÁ¾	Road 1	477.5900421	92.39793091	0.006513552	0.365361512	0.184313729	0	499.2404	988.9658	641.1064	0.6678	3.6881	1689	1.561497632	0.00360706	58.62197268	0.135416757
29.02904921	×ÔÉí³µÁ¾	Road 1	478.0195156	92.4090889	0.006507168	0.364504308	0.184313729	0	499.5995	988.9883	641.0884	0.6518	3.7041	1690	1.551290842	0.003583482	58.64792746	0.135476712
29.04598337	×ÔÉí³µÁ¾	Road 1	478.4542881	92.4274292	0.006497599	0.364401013	0.184313729	0	500.1895	989.0264	641.0587	0.6243	3.7325	1691	1.883874992	0.004351751	58.67982931	0.135550406
29.06232957	×ÔÉí³µÁ¾	Road 1	478.874019	92.43926697	0.006481673	0.364980519	0.184313729	0	500.5743	989.0508	641.0393	0.6069	3.75	1692	1.597460417	0.003690134	58.70594172	0.135610725
29.07895583	×ÔÉí³µÁ¾	Road 1	479.3009929	92.45053482	0.006459419	0.364278257	0.184313729	0	500.9336	989.0742	641.0211	0.5902	3.768	1693	1.560490243	0.003604732	58.73188683	0.135670659
29.0956323	×ÔÉí³µÁ¾	Road 1	479.7293081	92.46167908	0.006446725	0.36464715	0.184313729	0	501.2928	989.0967	641.0031	0.5745	3.7841	1694	1.553090192	0.003587638	58.75778689	0.135730488
29.11230621	×ÔÉí³µÁ¾	Road 1	480.1576349	92.47841949	0.006446725	0.364150405	0.184313729	0	501.8318	989.1309	640.9759	0.5503	3.8096	1695	1.821588142	0.004207869	58.78815988	0.135800649
29.12897388	×ÔÉí³µÁ¾	Road 1	480.5858532	92.48955688	0.006446725	0.3644979	0.184313729	0	502.1913	989.1533	640.9578	0.5353	3.8257	1696	1.553420683	0.003588402	58.81405179	0.13586046
29.14568408	×ÔÉí³µÁ¾	Road 1	481.0152193	92.50150452	0.006446725	0.364422113	0.184313729	0	502.5764	989.1777	640.9384	0.5178	3.843	1697	1.590979627	0.003675163	58.84063737	0.135921872
29.16233342	×ÔÉí³µÁ¾	Road 1	481.4431066	92.51979675	0.006446725	0.364319593	0.184313729	0	503.167	989.2158	640.9086	0.4904	3.8712	1698	1.897962076	0.004384292	58.8722372	0.135994868
29.17924779	×ÔÉí³µÁ¾	Road 1	481.8778487	92.5291214	0.006440385	0.36473766	0.184313729	0	503.4752	989.2344	640.8931	0.4774	3.884	1699	1.460475607	0.003373699	58.89694022	0.136051932
29.21234488	×ÔÉí³µÁ¾	Road 1	482.72877	92.55547485	0.006440385	0.363946795	0.184313729	0	504.3229	989.2881	640.8504	0.439	3.9231	1700	1.656673008	0.003826915	58.95177127	0.136178592
29.22903931	×ÔÉí³µÁ¾	Road 1	483.1580625	92.57294998	0.006434049	0.363873482	0.184313729	0	504.8882	989.3232	640.8219	0.414	3.9491	1701	1.857357583	0.004290496	58.98277881	0.136250219
29.24612596	×ÔÉí³µÁ¾	Road 1	483.5974935	92.58407364	0.006434049	0.364190191	0.184313729	0	505.248	989.3457	640.8038	0.398	3.9651	1702	1.540949866	0.003559594	59.00910848	0.136311041
29.26231711	×ÔÉí³µÁ¾	Road 1	484.0139693	92.60075912	0.006430882	0.364355981	0.184313729	0	505.7877	989.3799	640.7766	0.3736	3.9905	1703	1.844839943	0.00426158	59.03897856	0.13638004
29.27904747	×ÔÉí³µÁ¾	Road 1	484.4443657	92.61173172	0.006430882	0.363819748	0.184313729	0	506.1476	989.4023	640.7584	0.3586	4.0064	1704	1.545190392	0.00356939	59.06483014	0.136439758
29.29567445	×ÔÉí³µÁ¾	Road 1	484.8721553	92.62306824	0.006430882	0.363725245	0.184313729	0	506.5076	989.4238	640.7402	0.3436	4.0223	1705	1.566123949	0.003617746	59.09087007	0.13649991
29.31238172	×ÔÉí³µÁ¾	Road 1	485.3020609	92.6339653	0.006430882	0.364143342	0.184313729	0	506.8676	989.4463	640.7222	0.3277	4.0382	1706	1.542596309	0.003563397	59.11664263	0.136559444
29.32904793	×ÔÉí³µÁ¾	Road 1	485.7309949	92.652285	0.006430882	0.363222361	0.184313729	0	507.459	989.4834	640.6923	0.3014	4.0655	1707	1.900679834	0.00439057	59.14831975	0.136632619
29.34568774	×ÔÉí³µÁ¾	Road 1	486.1593046	92.66419144	0.006430882	0.363734543	0.184313729	0	507.8449	989.5068	640.6729	0.2849	4.0819	1708	1.593689275	0.003681422	59.17483845	0.136693877
29.36238584	×ÔÉí³µÁ¾	Road 1	486.5891655	92.6751709	0.006424551	0.363927484	0.184313729	0	508.205	989.5293	640.6547	0.269	4.0978	1709	1.547387308	0.003574465	59.20067688	0.136753564
29.37903849	×ÔÉí³µÁ¾	Road 1	487.0179332	92.69180832	0.006411904	0.36383912	0.184313729	0	508.7454	989.5625	640.6274	0.2456	4.1221	1710	1.821172403	0.004206908	59.23100422	0.13682362
29.39568747	×ÔÉí³µÁ¾	Road 1	487.4466579	92.70289764	0.006386658	0.363778204	0.184313729	0	509.1057	989.584	640.6093	0.2307	4.137	1711	1.554600425	0.003591127	59.25688673	0.136883408
29.41242992	×ÔÉí³µÁ¾	Road 1	487.8778664	92.71943207	0.006355194	0.363709062	0.184313729	0	509.6461	989.6172	640.5821	0.2073	4.1613	1712	1.812403571	0.004186652	59.28723081	0.136953503
29.4289572	×ÔÉí³µÁ¾	Road 1	488.3035715	92.72777481	0.006320703	0.266734779	0.184313729	0	510.0066	989.6387	640.5638	0.1934	4.1763	1713	1.425708739	0.003293387	59.3107939	0.137007934
29.4456443	×ÔÉí³µÁ¾	Road 1	488.733404	92.73013687	0.006270758	0.116638675	0.184313729	0	510.367	989.6602	640.5457	0.1784	4.1922	1714	1.134667156	0.002621081	59.32972821	0.137051672
29.46238236	×ÔÉí³µÁ¾	Road 1	489.1644809	92.71549072	0.006221077	-0.078555182	0.184313729	0	510.9335	989.6904	640.5171	0.1585	4.2132	1715	1.021120483	0.002358788	59.34681978	0.137091154
29.47896646	×ÔÉí³µÁ¾	Road 1	489.5915107	92.69764481	0.006168578	-0.254386067	0.184313729	0	511.2942	989.708	640.4988	0.1475	4.2253	1716	1.020981682	0.002358468	59.36375184	0.137130267
29.49567299	×ÔÉí³µÁ¾	Road 1	490.021603	92.67827454	0.006098023	-0.25554049	0.184313729	0	511.6549	989.7217	640.4805	0.1403	4.2334	1717	1.020831024	0.00235812	59.38080638	0.137169663
29.51239968	×ÔÉí³µÁ¾	Road 1	490.452107	92.65518265	0.00603104	-0.147668123	0.184313729	0	512.196	989.7393	640.453	0.1336	4.2452	1718	1.020651421	0.002357705	59.3978785	0.137209099
29.56239134	×ÔÉí³µÁ¾	Road 1	491.738617	92.64416885	0.00596455	0.055713717	0.184313729	0	513.0466	989.7598	640.4097	0.1315	4.2611	1719	1.020565758	0.002357507	59.44889828	0.137326955
29.57899047	×ÔÉí³µÁ¾	Road 1	492.1658469	92.65712585	0.005889588	0.183450535	0.184313729	0	513.8715	989.7764	640.3676	0.1329	4.2775	1720	1.645667474	0.003801492	59.47621493	0.137390056
29.59568417	×ÔÉí³µÁ¾	Road 1	492.5955602	92.66776886	0.005715173	0.227739379	0.184313729	0	514.2324	989.7832	640.3491	0.1347	4.2857	1721	1.531287768	0.003537275	59.50177779	0.137449107
29.61235294	×ÔÉí³µÁ¾	Road 1	493.0247192	92.68661728	0.005671386	0.278701574	0.184313729	0	514.7738	989.793	640.3215	0.1377	4.2995	1722	1.926539167	0.004450305	59.53389083	0.137523288
29.62898506	×ÔÉí³µÁ¾	Road 1	493.4529671	92.69368973	0.005633619	0.290610671	0.184313729	0	514.9543	989.7969	640.3123	0.1381	4.305	1723	1.361569907	0.003145226	59.55653663	0.1375756
29.6456762	×ÔÉí³µÁ¾	Road 1	493.8828357	92.71551819	0.005613353	0.326348692	0.184313729	0	515.4958	989.8066	640.2847	0.1422	4.3188	1724	2.068856015	0.004779057	59.59106818	0.137655367
29.66230611	×ÔÉí³µÁ¾	Road 1	494.3111965	92.73039093	0.005607571	0.344659209	0.184313729	0	515.8569	989.8125	640.2662	0.1449	4.3279	1725	1.737876586	0.004014495	59.61996893	0.137722128
29.67901264	×ÔÉí³µÁ¾	Road 1	494.7416505	92.75620193	0.005604682	0.365854412	0.184313729	0	516.5017	989.8252	640.2333	0.1479	4.3457	1726	2.259703879	0.005219916	59.65772074	0.137809335
29.71237365	×ÔÉí³µÁ¾	Road 1	495.6015041	92.78714905	0.005604682	0.369792998	0.184313729	0	517.3531	989.8398	640.1899	0.1537	4.3655	1727	1.765397712	0.004078069	59.71661618	0.137945383
29.72902483	×ÔÉí³µÁ¾	Road 1	496.0307311	92.79927521	0.005604682	0.37061438	0.184313729	0	517.7144	989.8467	640.1714	0.1554	4.3737	1728	1.605764957	0.003709317	59.74335406	0.138007148
29.74562799	×ÔÉí³µÁ¾	Road 1	496.4587851	92.81331024	0.005604682	0.370831698	0.184313729	0	518.1531	989.8535	640.149	0.1533	4.3764	1729	1.699855468	0.003926666	59.77157704	0.138072343
29.76237228	×ÔÉí³µÁ¾	Road 1	496.8905295	92.8244957	0.005604682	0.37081793	0.184313729	0	518.5145	989.8594	640.1306	0.1482	4.3738	1730	1.557810007	0.003598541	59.79766145	0.138132598
29.77899083	×ÔÉí³µÁ¾	Road 1	497.3190832	92.83559189	0.005604682	0.370639592	0.184313729	0	518.876	989.8652	640.1121	0.1431	4.3721	1731	1.557705982	0.003598301	59.82354828	0.138192397
29.79563248	×ÔÉí³µÁ¾	Road 1	497.7483157	92.8536026	0.005604682	0.3710078	0.184313729	0	519.4699	989.873	640.0817	0.1383	4.3672	1732	1.890563401	0.004367201	59.85501037	0.138265074
29.81236174	×ÔÉí³µÁ¾	Road 1	498.1798593	92.86466446	0.005604682	0.370331407	0.184313729	0	519.8315	989.8779	640.0632	0.1361	4.3646	1733	1.552907475	0.003587216	59.88098936	0.138325085
29.82900229	×ÔÉí³µÁ¾	Road 1	498.6091653	92.87564392	0.005604682	0.369954526	0.184313729	0	520.1931	989.8818	640.0447	0.1349	4.361	1734	1.551910752	0.003584914	59.90681401	0.13838474
29.8456641	×ÔÉí³µÁ¾	Road 1	499.0390745	92.88745422	0.005604682	0.370031595	0.184313729	0	520.5806	989.8857	640.0249	0.1351	4.3569	1735	1.591417445	0.003676174	59.9333299	0.138445992
29.86228192	×ÔÉí³µÁ¾	Road 1	499.4679115	92.90104294	0.005604682	0.370340645	0.184313729	0	521.0198	989.8906	640.0024	0.1353	4.3538	1736	1.679020381	0.003878537	59.96123156	0.138510445
29.8789496	×ÔÉí³µÁ¾	Road 1	499.8980981	92.91469345	0.005604682	0.369847089	0.184313729	0	521.4591	989.8945	639.98	0.1374	4.3488	1737	1.680236011	0.003881345	59.98923719	0.138575138
29.89576169	×ÔÉí³µÁ¾	Road 1	500.3320714	92.92736206	0.005604682	0.370288372	0.176470593	0	521.8726	989.8975	639.9588	0.141	4.3442	1738	1.627878011	0.003760398	60.01660523	0.138638358
29.91233956	×ÔÉí³µÁ¾	Road 1	500.7600864	92.94643707	0.005604682	0.369711667	0.176470593	0	522.493	989.9014	639.9268	0.1464	4.3358	1739	1.947055815	0.004497699	60.04888327	0.13871292
29.92905966	×ÔÉí³µÁ¾	Road 1	501.1918253	92.95762253	0.005593135	0.368678659	0.176470593	0	522.8549	989.9033	639.9082	0.1501	4.3312	1740	1.560390411	0.003604502	60.07497314	0.138773188
29.94563166	×ÔÉí³µÁ¾	Road 1	501.6198196	92.9748436	0.005564336	0.366749614	0.168627456	0	523.3979	989.9063	639.8806	0.157	4.3243	1741	1.858016318	0.004292018	60.10576419	0.138844315
30.01246731	×ÔÉí³µÁ¾	Road 1	503.3467115	93.01639252	0.005512748	0.360716015	0.160784319	0	524.7689	989.9131	639.8104	0.1741	4.3062	1742	1.523066172	0.003518283	60.20755931	0.139079462
30.02898323	×ÔÉí³µÁ¾	Road 1	503.773553	93.03929214	0.005433137	0.357630402	0.145098045	0	525.5192	989.916	639.772	0.1858	4.2955	1743	2.138322531	0.004939525	60.24287568	0.139161043
30.04569856	×ÔÉí³µÁ¾	Road 1	504.2055976	93.04996262	0.004852461	0.353933543	0.027450981	0	525.8815	989.917	639.7533	0.1914	4.2899	1744	1.537024034	0.003550526	60.26856753	0.139220391
30.06230318	×ÔÉí³µÁ¾	Road 1	504.6348345	93.06158066	0.004678758	0.34016487	0	0	526.2957	989.9189	639.7322	0.197	4.2844	1745	1.586490576	0.003664793	60.29491062	0.139281244
30.07907349	×ÔÉí³µÁ¾	Road 1	505.0683976	93.07085724	0.00450176	0.277770638	0	0.011764706	526.684	989.9199	639.7122	0.203	4.2783	1746	1.468773705	0.003392867	60.31954241	0.139338143
30.09569352	×ÔÉí³µÁ¾	Road 1	505.4980919	93.07444153	0.004297743	0.12625131	0	0.011764706	527.2276	989.9219	639.6843	0.211	4.2704	1747	1.197375214	0.002765937	60.33944281	0.139384113
30.11229228	×ÔÉí³µÁ¾	Road 1	505.9272294	93.07291031	0.004123483	0.116098225	0	0.011764706	527.59	989.9229	639.6658	0.2166	4.2648	1748	1.023900414	0.00236521	60.35643829	0.139423372
30.12898341	×ÔÉí³µÁ¾	Road 1	506.3587569	93.07330856	0.003949422	0.177891046	0	0.011764706	528.1337	989.9248	639.6379	0.2235	4.2568	1749	1.043095146	0.00240955	60.37384873	0.139463591
30.14561406	×ÔÉí³µÁ¾	Road 1	506.7887306	93.07542343	0.003751521	0.186404362	0	0.011764706	528.4961	989.9268	639.6193	0.2281	4.2522	1750	1.126206177	0.002601536	60.39257828	0.139506856
30.16232499	×ÔÉí³µÁ¾	Road 1	507.2207862	93.07683792	0.003573166	0.156696215	0	0.011764706	528.8585	989.9277	639.6007	0.2337	4.2466	1751	1.092015825	0.002522557	60.41082688	0.13954901
30.17899413	×ÔÉí³µÁ¾	Road 1	507.6517567	93.07580795	0.003396417	0.115968443	0	0.011764706	529.428	989.9297	639.5715	0.2421	4.2382	1752	1.023922951	0.002365262	60.42789479	0.139588437
30.19566951	×ÔÉí³µÁ¾	Road 1	508.0828822	93.07448959	0.00320167	0.122793101	0	0.011764706	529.7905	989.9307	639.553	0.2478	4.2326	1753	1.023912697	0.002365238	60.44496892	0.139627878
30.21230492	×ÔÉí³µÁ¾	Road 1	508.5129711	93.07371368	0.003012603	0.137904808	0	0.011764706	530.1529	989.9316	639.5344	0.2533	4.227	1754	1.023906662	0.002365224	60.46200203	0.139667225
30.22899386	×ÔÉí³µÁ¾	Road 1	508.9444426	93.07349396	0.002812847	0.139203027	0	0.011764706	530.6965	989.9336	639.5065	0.2602	4.2191	1755	1.023904953	0.00236522	60.47908992	0.139706698
30.24562414	×ÔÉí³µÁ¾	Road 1	509.3743958	93.0730545	0.002599555	0.127098531	0	0.011764706	531.059	989.9346	639.4879	0.2658	4.2135	1756	1.023901535	0.002365213	60.49611769	0.139746032
30.26231345	×ÔÉí³µÁ¾	Road 1	509.8058692	93.07184601	0.002423663	0.118624628	0	0.011764706	531.4473	989.9355	639.468	0.2718	4.2074	1757	1.023892136	0.002365191	60.51320574	0.139785505
30.2789397	×ÔÉí³µÁ¾	Road 1	510.2357038	93.06995087	0.00225904	0.121562071	0	0.011764706	531.9909	989.9375	639.4401	0.2787	4.1985	1758	1.023877396	0.002365157	60.53022898	0.139824829
30.29563853	×ÔÉí³µÁ¾	Road 1	510.6674103	93.06898956	0.00209005	0.126923934	0	0.011764706	532.3533	989.9385	639.4215	0.2843	4.1929	1759	1.023869919	0.00236514	60.54732641	0.139864324
30.31230144	×ÔÉí³µÁ¾	Road 1	511.0981835	93.06799393	0.001946784	0.12687628	0	0.011764706	532.7416	989.9395	639.4016	0.2903	4.1868	1760	1.023862175	0.002365122	60.56438694	0.139903734
30.32897791	×ÔÉí³µÁ¾	Road 1	511.5293002	93.06644211	0.001806143	0.120242998	0	0.011764706	533.2852	989.9404	639.3738	0.2992	4.1779	1761	1.023850105	0.002365094	60.58146114	0.139943175
30.34568114	×ÔÉí³µÁ¾	Road 1	511.9611032	93.06528854	0.001646776	0.118622735	0	0.011764706	533.6476	989.9414	639.3552	0.3038	4.1723	1762	1.023841133	0.002365073	60.5985626	0.13998268
30.36236788	×ÔÉí³µÁ¾	Road 1	512.3924726	93.06371613	0.00150307	0.120405555	0	0.011764706	534.0359	989.9424	639.3353	0.3098	4.1662	1763	1.023828903	0.002365045	60.61564696	0.140022144
30.37899707	×ÔÉí³µÁ¾	Road 1	512.8223475	93.06227417	0.001369106	0.122202843	0	0.011764706	534.5795	989.9443	639.3074	0.3177	4.1583	1764	1.023817688	0.002365019	60.63267221	0.140061473
30.39583666	×ÔÉí³µÁ¾	Road 1	513.257656	93.06107254	0.00123174	0.121554069	0	0.011764706	534.9418	989.9453	639.2888	0.3233	4.1527	1765	1.023808342	0.002364997	60.64991273	0.140101298
30.4122635	×ÔÉí³µÁ¾	Road 1	513.6822896	93.05991898	0.001129505	0.120263621	0	0.011764706	535.3042	989.9463	639.2703	0.3288	4.1471	1766	1.02379937	0.002364977	60.66673052	0.140140148
30.42893301	×ÔÉí³µÁ¾	Road 1	514.1131876	93.05811996	0.001034025	0.12004751	0	0.011764706	535.8737	989.9473	639.241	0.3372	4.1377	1767	1.023785377	0.002364944	60.68379652	0.14017957
30.44559849	×ÔÉí³µÁ¾	Road 1	514.543976	93.0569458	0.000971661	0.120907344	0	0.011764706	536.236	989.9482	639.2224	0.3427	4.1322	1768	1.023776245	0.002364923	60.70085824	0.140218983
30.46231235	×ÔÉí³µÁ¾	Road 1	514.9760066	93.05509186	0.000927442	0.121597305	0	0.011764706	536.5984	989.9492	639.2039	0.3483	4.1266	1769	1.023761826	0.00236489	60.71796925	0.140258509
30.4789232	×ÔÉí³µÁ¾	Road 1	515.4053694	93.05396576	0.000896448	0.120751485	0	0.011764706	537.1419	989.9512	639.176	0.3562	4.1187	1770	1.023753067	0.00236487	60.73497467	0.140297791
30.49565723	×ÔÉí³µÁ¾	Road 1	515.8379099	93.0526886	0.000869485	0.120953001	0	0.011764706	537.5043	989.9521	639.1575	0.3618	4.1131	1771	1.023743134	0.002364847	60.75210601	0.140337365
30.51231207	×ÔÉí³µÁ¾	Road 1	516.2683962	93.05104752	0.000843885	0.120779149	0	0.011764706	538.0478	989.9531	639.1295	0.3706	4.1043	1772	1.02373037	0.002364817	60.76915608	0.140376751
30.52897828	×ÔÉí³µÁ¾	Road 1	516.6991701	93.04971542	0.000821199	0.121871747	0	0.011764706	538.436	989.9541	639.1097	0.3766	4.0983	1773	1.023720009	0.002364793	60.78621761	0.140416163
30.54564559	×ÔÉí³µÁ¾	Road 1	517.1299671	93.04856873	0.000802871	0.12097761	0	0.011764706	538.7983	989.9551	639.0911	0.3812	4.0927	1774	1.02371109	0.002364773	60.80328012	0.140455577
30.56232096	×ÔÉí³µÁ¾	Road 1	517.5609647	93.04679718	0.00079185	0.120341867	0	0.011764706	539.1865	989.9561	639.0712	0.3873	4.0867	1775	1.023697952	0.002364742	60.82035066	0.14049501
30.5789923	×ÔÉí³µÁ¾	Road 1	517.9918523	93.04562988	0.000782483	0.119858809	0	0.011764706	539.73	989.957	639.0433	0.3961	4.0778	1776	1.023688232	0.00236472	60.83741692	0.140534433
30.59565778	×ÔÉí³µÁ¾	Road 1	518.4225826	93.04440765	0.00077628	0.119463675	0	0.011764706	540.0923	989.958	639.0247	0.4017	4.0723	1777	1.023678726	0.002364698	60.85447701	0.140573842
30.61229979	×ÔÉí³µÁ¾	Road 1	518.8526976	93.04245071	0.000773191	0.119666532	0	0.011764706	540.4805	989.959	639.0048	0.4078	4.0662	1778	1.023663506	0.002364663	60.87151283	0.140613195
30.62899606	×ÔÉí³µÁ¾	Road 1	519.2842084	93.04109802	0.00077165	0.118783414	0	0.011764706	541.024	989.96	638.9769	0.4167	4.0574	1779	1.023652985	0.002364638	60.88860402	0.140652675
30.64572568	×ÔÉí³µÁ¾	Road 1	519.7165705	93.03876343	0.00077165	0.045981593	0	0.035294119	541.3863	989.9609	638.9583	0.4223	4.0518	1780	1.023634827	0.002364596	60.90572904	0.140692234
30.66238896	×ÔÉí³µÁ¾	Road 1	520.1470908	93.01131821	0.00077165	-0.569516361	0	0.082352944	541.9297	989.9619	638.9305	0.4312	4.043	1781	1.023421364	0.002364103	60.92278259	0.140731628
30.67895143	×ÔÉí³µÁ¾	Road 1	520.5747742	92.9607605	0.00077165	-1.107718706	0	0.137254909	542.2917	989.9629	638.9119	0.4368	4.0374	1782	1.023028137	0.002363195	60.93972647	0.140770768
30.69566016	×ÔÉí³µÁ¾	Road 1	521.0058702	92.88231812	0.00077165	-1.715230107	0	0.20784314	542.6536	989.9639	638.8933	0.4424	4.0318	1783	1.02241803	0.002361786	60.95680978	0.140810231
30.71235972	×ÔÉí³µÁ¾	Road 1	521.4362126	92.77084122	0.00077165	-2.341237068	0	0.239215687	543.0151	989.9639	638.8748	0.4489	4.0253	1784	1.021550987	0.002359783	60.97386923	0.140849638
30.7289145	×ÔÉí³µÁ¾	Road 1	521.8620698	92.6068634	0.00077165	-2.61263895	0	0.262745112	543.4533	989.9648	638.8524	0.4559	4.0184	1785	1.020275604	0.002356837	60.99075967	0.140888655
30.74719502	×ÔÉí³µÁ¾	Road 1	522.3311808	92.38246765	0.00077165	-2.568511486	0	0.294117659	544.045	989.9668	638.822	0.4647	4.0096	1786	1.018530304	0.002352805	61.00937893	0.140931665
30.7629573	×ÔÉí³µÁ¾	Road 1	522.735039	92.23851929	0.00077165	-2.895652294	0	0.325490206	544.4044	989.9668	638.8036	0.4712	4.0031	1787	1.017410706	0.002350219	61.02541565	0.14096871
30.77890909	×ÔÉí³µÁ¾	Road 1	523.1426144	91.98161774	0.00077165	-3.545677185	0	0.356862754	544.9424	989.9678	638.776	0.48	3.9944	1788	1.015412582	0.002345603	61.04161329	0.141006127
30.79559509	×ÔÉí³µÁ¾	Road 1	523.5680589	91.78953552	0.00077165	-3.787418365	0	0.411764711	545.3002	989.9688	638.7576	0.4856	3.9889	1789	1.01391861	0.002342152	61.05853154	0.141045208
30.82901915	×ÔÉí³µÁ¾	Road 1	524.4149028	91.21088562	0.00077165	-5.049646854	0	0.482352942	546.191	989.9707	638.7119	0.4988	3.9738	1790	1.009417999	0.002331756	61.09227039	0.141123145
30.8456476	×ÔÉí³µÁ¾	Road 1	524.8349921	90.94781799	0.000768573	-5.109491348	0	0.545098066	546.5457	989.9717	638.6937	0.5043	3.9683	1791	1.007371918	0.002327029	61.10902142	0.141161839
30.86229805	×ÔÉí³µÁ¾	Road 1	525.2542711	90.65248489	0.000752554	-5.690302372	0	0.662745118	546.9244	989.9717	638.6743	0.5112	3.9613	1792	1.005074883	0.002321723	61.12575637	0.141200497
30.87899432	×ÔÉí³µÁ¾	Road 1	525.6723764	90.15065002	0.000736012	-7.055258751	0	0.678431392	547.4525	989.9736	638.6472	0.5188	3.9536	1793	1.001171722	0.002312707	61.1424722	0.141239111
30.8957375	×ÔÉí³µÁ¾	Road 1	526.0899599	89.7858078	0.000716044	-7.048803806	0	0.701960802	547.8027	989.9736	638.6293	0.5252	3.9472	1794	0.998334061	0.002306152	61.15918749	0.141277723
30.91229448	×ÔÉí³µÁ¾	Road 1	526.5007009	89.30785446	0.000692134	-6.758135319	0	0.694117665	548.1516	989.9746	638.6115	0.5305	3.9418	1795	0.994616646	0.002297564	61.17565533	0.141315764
30.92896325	×ÔÉí³µÁ¾	Road 1	526.9123619	88.9075264	0.000663872	-6.905141354	0	0.694117665	548.6724	989.9756	638.5847	0.539	3.9333	1796	0.991502983	0.002290372	61.19218247	0.141353942
30.94566282	×ÔÉí³µÁ¾	Road 1	527.3231281	88.55070419	0.000628297	-6.916865826	0	0.694117665	549.0179	989.9766	638.567	0.5443	3.9281	1797	0.988727699	0.002283961	61.20869379	0.141392083
30.96363433	×ÔÉí³µÁ¾	Road 1	527.7625879	88.0312706	0.000594016	-6.529163361	0	0.686274529	549.5335	989.9775	638.5405	0.5527	3.9198	1798	0.98468766	0.002274628	61.22639012	0.141432961
30.97894978	×ÔÉí³µÁ¾	Road 1	528.1355872	87.67601395	0.000561629	-6.417927742	0	0.686274529	549.9	989.9775	638.5217	0.5593	3.9133	1799	0.981924553	0.002268246	61.24142874	0.1414677
30.99565191	×ÔÉí³µÁ¾	Road 1	528.5408095	87.34217377	0.000534651	-6.564455032	0	0.686274529	550.2407	989.9785	638.5043	0.5646	3.9081	1800	0.979328018	0.002262248	61.2577856	0.141505485
31.01231885	×ÔÉí³µÁ¾	Road 1	528.9435935	86.99989471	0.000517941	-6.710446358	0	0.686274529	550.5801	989.9785	638.4868	0.5708	3.9019	1801	0.976665848	0.002256098	61.27406364	0.141543087
31.02891542	×ÔÉí³µÁ¾	Road 1	529.3420637	86.43311691	0.000506803	-6.700268745	0	0.686274529	551.1348	989.9795	638.4584	0.58	3.8927	1802	0.972257576	0.002245915	61.29019977	0.141580361
31.04558162	×ÔÉí³µÁ¾	Road 1	529.7406231	86.09121552	0.000500428	-6.633699894	0	0.686274529	551.4706	989.9805	638.4412	0.5852	3.8875	1803	0.969598343	0.002239772	61.3063593	0.14161769
31.0623402	×ÔÉí³µÁ¾	Road 1	530.1396877	85.72518539	0.000499851	-6.650967121	0	0.686274529	551.829	989.9814	638.4228	0.5908	3.8819	1804	0.966751442	0.002233196	61.32256068	0.141655115
31.0789254	×ÔÉí³µÁ¾	Road 1	530.5322612	85.2123848	0.000499851	-6.628846169	0	0.686274529	552.3281	989.9824	638.3972	0.5989	3.8738	1805	0.962762993	0.002223983	61.3385283	0.141692
31.09561544	×ÔÉí³µÁ¾	Road 1	530.9257405	84.87253647	0.000499851	-6.586831093	0	0.686274529	552.6592	989.9824	638.3802	0.6049	3.8677	1806	0.960119728	0.002217877	61.35455273	0.141729017
31.11300706	×ÔÉí³µÁ¾	Road 1	531.3341245	84.5339447	0.000499851	-6.585064411	0	0.686274529	552.989	989.9834	638.3633	0.6098	3.8627	1807	0.957486237	0.002211793	61.37120497	0.141767483
31.1289035	×ÔÉí³µÁ¾	Road 1	531.7050397	83.99959717	0.000499851	-6.621747494	0	0.686274529	553.5046	989.9844	638.3369	0.6171	3.8543	1808	0.9533302	0.002202193	61.38635953	0.141802491
31.14563752	×ÔÉí³µÁ¾	Road 1	532.0937934	83.63281174	0.000499851	-6.680061817	0	0.694117665	553.8542	989.9844	638.3189	0.6233	3.848	1809	0.950477425	0.002195603	61.40226483	0.141839232
31.17893622	×ÔÉí³µÁ¾	Road 1	532.8596166	82.79495316	0.000499851	-6.706625938	0	0.694117665	554.6411	989.9863	638.2786	0.6355	3.8357	1810	0.943960747	0.002180549	61.43369749	0.141911841
31.1955885	×ÔÉí³µÁ¾	Road 1	533.241003	82.4506279	0.000499851	-6.692036152	0	0.694117665	554.9628	989.9863	638.2621	0.6413	3.8299	1811	0.941282661	0.002174363	61.449372	0.141948049
31.21229869	×ÔÉí³µÁ¾	Road 1	533.6213277	81.93613815	0.000487272	-6.635407448	0	0.686274529	555.4427	989.9873	638.2374	0.6489	3.8221	1812	0.937281075	0.002165119	61.46503415	0.141984229
31.22902282	×ÔÉí³µÁ¾	Road 1	534.0003932	81.59685287	0.000474906	-6.557069778	0	0.678431392	555.7611	989.9883	638.2211	0.6537	3.8173	1813	0.934642189	0.002159023	61.48066522	0.142020337
31.24564614	×ÔÉí³µÁ¾	Road 1	534.3756295	81.26237411	0.000455124	-6.46179533	0	0.670588255	556.0782	989.9883	638.2048	0.6594	3.8116	1814	0.932040688	0.002153014	61.49615883	0.142056127
31.2623468	×ÔÉí³µÁ¾	Road 1	534.7503173	80.76780396	0.000438009	-6.384047031	0	0.670588255	556.5513	989.9893	638.1805	0.6669	3.804	1815	0.928194031	0.002144128	61.51166029	0.142091935
31.27901118	×ÔÉí³µÁ¾	Road 1	535.1226718	80.4396286	0.000420814	-6.35962677	0	0.654901981	556.8651	989.9893	638.1645	0.6727	3.7983	1816	0.925641556	0.002138232	61.52708553	0.142127568
31.29567262	×ÔÉí³µÁ¾	Road 1	535.4927142	79.95423203	0.00040108	-6.229835987	0	0.654901981	557.3335	989.9902	638.1404	0.6805	3.7907	1817	0.921866249	0.002129511	61.54244515	0.142163048
31.3123249	×ÔÉí³µÁ¾	Road 1	535.8610781	79.63533325	0.000383903	-6.15747261	0	0.639215708	557.6442	989.9912	638.1245	0.6854	3.7861	1818	0.919385925	0.002123781	61.55775502	0.142198414
31.32897461	×ÔÉí³µÁ¾	Road 1	536.2279325	79.32123413	0.000366286	-6.038958073	0	0.623529434	557.9536	989.9912	638.1086	0.6912	3.7804	1819	0.916942932	0.002118138	61.57302186	0.14223368
31.3456027	×ÔÉí³µÁ¾	Road 1	536.5922052	78.86545944	0.000344246	-5.761734009	0	0.607843161	558.4155	989.9922	638.085	0.6986	3.773	1820	0.913398018	0.002109949	61.58820992	0.142268765
31.36235175	×ÔÉí³µÁ¾	Road 1	536.9577625	78.57199402	0.000324404	-5.653552055	0	0.600000024	558.722	989.9932	638.0692	0.7031	3.7684	1821	0.911115509	0.002104677	61.60347024	0.142304016
31.37895931	×ÔÉí³µÁ¾	Road 1	537.318893	78.28181763	0.000300795	-5.589326382	0	0.58431375	559.0273	989.9932	638.0536	0.7086	3.7629	1822	0.908858582	0.002099463	61.61856416	0.142338883
31.39648546	×ÔÉí³µÁ¾	Road 1	537.6979239	77.85574722	0.000273703	-5.408725739	0	0.568627477	559.4833	989.9941	638.0302	0.7159	3.7556	1823	0.905544701	0.002091808	61.63443487	0.142375545
31.4122745	×ÔÉí³µÁ¾	Road 1	538.0381801	77.58052597	0.000249012	-5.261341095	0	0.552941203	559.7859	989.9941	638.0146	0.7214	3.7501	1824	0.903404091	0.002086863	61.64869875	0.142408494
31.42890845	×ÔÉí³µÁ¾	Road 1	538.3954085	77.31309814	0.000218797	-5.092265606	0	0.529411793	560.0874	989.9951	637.9992	0.7258	3.7456	1825	0.901324097	0.002082059	61.66369134	0.142443127
31.44561645	×ÔÉí³µÁ¾	Road 1	538.7523676	76.91244736	0.000192654	-4.765944481	0	0.505882382	560.5592	989.9951	637.975	0.7344	3.737	1826	0.898207924	0.00207486	61.67869859	0.142477794
31.46232041	×ÔÉí³µÁ¾	Road 1	539.1081219	76.67134552	0.000167009	-4.566760063	0	0.490196079	560.8582	989.9961	637.9597	0.7388	3.7326	1827	0.896332687	0.002070529	61.6936709	0.14251238
31.47893603	×ÔÉí³µÁ¾	Road 1	539.4608462	76.42249832	0.000142246	-4.405620575	0	0.474509805	561.1776	989.9961	637.9432	0.7446	3.7268	1828	0.894397209	0.002066058	61.70853187	0.142546709
31.49565869	×ÔÉí³µÁ¾	Road 1	539.8142865	76.08750458	0.000116312	-4.157614231	0	0.435294122	561.6229	989.9971	637.9205	0.7516	3.7197	1829	0.891791702	0.002060039	61.72344499	0.142581158
31.51241984	×ÔÉí³µÁ¾	Road 1	540.1675741	75.87997284	9.62E-05	-3.819073915	0	0.403921574	561.9187	989.998	637.9053	0.756	3.7153	1830	0.890177567	0.00205631	61.73836539	0.142615624
31.52888627	×ÔÉí³µÁ¾	Road 1	540.5137859	75.69109039	7.82E-05	-3.455512047	0	0.380392164	562.2138	989.998	637.8901	0.7613	3.7099	1831	0.888708481	0.002052917	61.75299925	0.142649428
31.54561553	×ÔÉí³µÁ¾	Road 1	540.8642731	75.42200089	6.05E-05	-3.129821062	0	0.349019617	562.6761	989.999	637.8664	0.7687	3.7025	1832	0.886615562	0.002048082	61.76783167	0.142683691
31.562314	×ÔÉí³µÁ¾	Road 1	541.2133724	75.26184082	4.77E-05	-2.981959105	0	0.333333343	562.9694	989.999	637.8514	0.774	3.6972	1833	0.885369873	0.002045204	61.78261599	0.142717843
31.57955167	×ÔÉí³µÁ¾	Road 1	541.5726558	75.03451996	3.74E-05	-2.795229673	0	0.31764707	563.4083	990	637.8289	0.7809	3.6902	1834	0.883601822	0.00204112	61.79784723	0.142753027
31.59565668	×ÔÉí³µÁ¾	Road 1	541.9076785	74.88859406	2.75E-05	-2.754127979	0	0.309803933	563.7003	990	637.8139	0.7862	3.6849	1835	0.882466843	0.002038498	61.81205936	0.142785857
31.61228403	×ÔÉí³µÁ¾	Road 1	542.2528966	74.74343033	2.05E-05	-2.744261742	0	0.301960796	563.9915	990.001	637.799	0.7905	3.6805	1836	0.881337791	0.00203589	61.82671368	0.142819709
31.62897077	×ÔÉí³µÁ¾	Road 1	542.5983581	74.52992477	1.52E-05	-2.630620956	0	0.294117659	564.4275	990.001	637.7766	0.7984	3.6726	1837	0.879677193	0.002032054	61.84139262	0.142853617
31.64564321	×ÔÉí³µÁ¾	Road 1	542.9428923	74.39363251	1.05E-05	-2.53101182	0	0.286274523	564.7174	990.002	637.7617	0.8026	3.6684	1838	0.878617142	0.002029606	61.85604131	0.142887455
31.66229255	×ÔÉí³µÁ¾	Road 1	543.286165	74.22403107	7.40E-06	-2.475360632	0	0.286274523	565.0068	990.002	637.7468	0.8079	3.6632	1839	0.877298019	0.002026558	61.87064775	0.142921196
31.67894446	×ÔÉí³µÁ¾	Road 1	543.6287462	74.06310883	5.03E-06	-2.535531521	0	0.286274523	565.4399	990.0029	637.7246	0.8147	3.6563	1840	0.876046402	0.002023667	61.8852356	0.142954894
31.69557548	×ÔÉí³µÁ¾	Road 1	543.9702266	73.91785583	3.15E-06	-2.585006475	0	0.286274523	565.7487	990.0039	637.7088	0.8193	3.6517	1841	0.874916656	0.002021057	61.89978635	0.142988506
31.71235386	×ÔÉí³µÁ¾	Road 1	544.3140969	73.78146057	2.08E-06	-2.553239584	0	0.278431386	566.0362	990.0039	637.6941	0.8245	3.6465	1842	0.873855804	0.002018607	61.91444823	0.143022375
31.72893759	×ÔÉí³µÁ¾	Road 1	544.6530296	73.57557678	1.35E-06	-2.411121845	0	0.278431386	566.487	990.0049	637.671	0.8317	3.6393	1843	0.872254486	0.002014908	61.92891347	0.14305579
31.74564485	×ÔÉí³µÁ¾	Road 1	544.9938949	73.44799805	8.59E-07	-2.409284353	0	0.278431386	566.7733	990.0049	637.6563	0.8369	3.6342	1844	0.871262207	0.002012616	61.94346988	0.143089415
31.76219486	×ÔÉí³µÁ¾	Road 1	545.3309581	73.31885376	6.27E-07	-2.461246014	0	0.278431386	567.059	990.0059	637.6416	0.841	3.63	1845	0.870257751	0.002010295	61.95787265	0.143122686
31.77891056	×ÔÉí³µÁ¾	Road 1	545.6704346	73.11185074	5.26E-07	-2.492567778	0	0.278431386	567.507	990.0059	637.6187	0.8491	3.6219	1846	0.868647728	0.002006576	61.9723927	0.143156227
31.79552288	×ÔÉí³µÁ¾	Road 1	546.0072051	72.98039246	5.02E-07	-2.470237255	0	0.278431386	567.7914	990.0068	637.6041	0.8533	3.6177	1847	0.867625275	0.002004214	61.98680597	0.143189522
31.81233828	×ÔÉí³µÁ¾	Road 1	546.3472229	72.79423599	5.02E-07	-2.455803156	0	0.278431386	568.0753	990.0068	637.5895	0.8584	3.6126	1848	0.866177391	0.00200087	62.00137109	0.143223167
31.82887033	×ÔÉí³µÁ¾	Road 1	546.6808273	72.64530258	5.02E-07	-2.46325326	0	0.278431386	568.5204	990.0078	637.5667	0.8656	3.6055	1849	0.86501902	0.001998194	62.01567163	0.143256201
31.84562928	×ÔÉí³µÁ¾	Road 1	547.0184051	72.51530685	4.85E-07	-2.439115047	0	0.270588249	568.803	990.0078	637.5521	0.8707	3.6004	1850	0.864007942	0.001995858	62.03015149	0.14328965
31.86227056	×ÔÉí³µÁ¾	Road 1	547.3530241	72.38795471	4.00E-07	-2.364196539	0	0.270588249	569.0851	990.0088	637.5377	0.8748	3.5963	1851	0.863017426	0.00199357	62.04451321	0.143322826
31.87888252	×ÔÉí³µÁ¾	Road 1	547.6861943	72.20175705	2.26E-07	-2.338407278	0	0.270588249	569.5074	990.0088	637.516	0.8825	3.5887	1852	0.861569221	0.001990225	62.05882556	0.143355887
31.89568069	×ÔÉí³µÁ¾	Road 1	548.0225154	72.07666397	5.10E-08	-2.360275745	0	0.262745112	569.7883	990.0098	637.5016	0.8866	3.5846	1853	0.860596275	0.001987977	62.073282	0.143389281
31.91224462	×ÔÉí³µÁ¾	Road 1	548.353293	71.89107056	1.75E-09	-2.29402566	0	0.262745112	570.2087	990.0098	637.48	0.8943	3.577	1854	0.859152771	0.001984643	62.08751295	0.143422155
31.92894749	×ÔÉí³µÁ¾	Road 1	548.686284	71.77019348	-2.68E-09	-2.262785435	0	0.262745112	570.4884	990.0107	637.4657	0.8984	3.5729	1855	0.858212616	0.001982471	62.10184756	0.143455268
31.94554112	×ÔÉí³µÁ¾	Road 1	549.0165411	71.64951553	-6.76E-08	-2.280682087	0	0.262745112	570.7676	990.0107	637.4514	0.9034	3.5679	1856	0.85727401	0.001980303	62.11607285	0.143488128
31.96232756	×ÔÉí³µÁ¾	Road 1	549.3497852	71.46712875	-2.65E-07	-2.264125109	0	0.254901975	571.1855	990.0117	637.4299	0.9101	3.5613	1857	0.855855446	0.001977026	62.13043962	0.143521316
31.97891789	×ÔÉí³µÁ¾	Road 1	549.6785899	71.34860001	-7.19E-07	-2.19938612	0	0.254901975	571.4636	990.0117	637.4156	0.9151	3.5563	1858	0.854933556	0.001974897	62.14462325	0.14355408
31.99566364	×ÔÉí³µÁ¾	Road 1	550.0096634	71.17415771	-1.79E-06	-2.185914993	0	0.254901975	571.8798	990.0127	637.3943	0.9217	3.5497	1859	0.853576782	0.001971762	62.15891703	0.143587098
32.01221035	×ÔÉí³µÁ¾	Road 1	550.3362621	71.0567276	-3.44E-06	-2.225304842	0	0.254901975	572.1567	990.0127	637.3801	0.9267	3.5447	1860	0.852663437	0.001969653	62.17302581	0.14361969
32.02886593	×ÔÉí³µÁ¾	Road 1	550.6644597	70.937883	-5.85E-06	-2.22043252	0	0.247058824	572.4332	990.0137	637.366	0.9308	3.5407	1861	0.85173909	0.001967517	62.18721201	0.14365246
32.04558859	×ÔÉí³µÁ¾	Road 1	550.9934416	70.82216263	-9.20E-06	-2.114083767	0	0.239215687	572.7092	990.0137	637.3518	0.9358	3.5357	1862	0.850839043	0.001965438	62.2014403	0.143685327
32.06226799	×ÔÉí³µÁ¾	Road 1	551.3207525	70.64515915	-1.23E-05	-1.964689851	0	0.239215687	573.1616	990.0146	637.3286	0.943	3.5285	1863	0.849462349	0.001962258	62.21560883	0.143718056
32.07894263	×ÔÉí³µÁ¾	Road 1	551.6474802	70.53945007	-1.50E-05	-1.967973113	0	0.223529413	573.4365	990.0146	637.3145	0.948	3.5236	1864	0.848640167	0.001960359	62.2297596	0.143750745
32.09565429	×ÔÉí³µÁ¾	Road 1	551.9742294	70.38780441	-1.74E-05	-1.754024267	0	0.20784314	573.8481	990.0156	637.2934	0.9545	3.5171	1865	0.847460701	0.001957634	62.24392208	0.14378346
32.11230437	×ÔÉí³µÁ¾	Road 1	552.299365	70.29924088	-1.94E-05	-1.508806705	0	0.176470593	574.1219	990.0156	637.2794	0.9595	3.5122	1866	0.846771873	0.001956043	62.25802089	0.143816028
32.12888371	×ÔÉí³µÁ¾	Road 1	552.622779	70.22539902	-2.17E-05	-1.187590361	0	0.152941182	574.3956	990.0166	637.2653	0.9635	3.5082	1867	0.846197548	0.001954716	62.27205029	0.143848436
32.14569434	×ÔÉí³µÁ¾	Road 1	552.9503373	70.14668884	-2.50E-05	-0.660071492	0	0.113725491	574.8055	990.0166	637.2443	0.9709	3.5007	1868	0.845585358	0.001953302	62.28626511	0.143881272
32.16232023	×ÔÉí³µÁ¾	Road 1	553.2741442	70.11383286	-2.84E-05	-0.441181988	0	0.090196081	575.0786	990.0176	637.2303	0.9749	3.4967	1869	0.845329811	0.001952712	62.30031947	0.143913738
32.17886181	×ÔÉí³µÁ¾	Road 1	553.5961926	70.0884819	-3.26E-05	-0.322966844	0	0.06666667	575.3515	990.0176	637.2162	0.9799	3.4918	1870	0.845132637	0.001952256	62.3142993	0.143946031
32.19562955	×ÔÉí³µÁ¾	Road 1	553.9225231	70.06247864	-3.79E-05	-0.118505768	0	0.050980393	575.7608	990.0186	637.1953	0.9863	3.4853	1871	0.844930389	0.001951789	62.32846687	0.143978758
32.21230676	×ÔÉí³µÁ¾	Road 1	554.2470503	70.05359344	-4.24E-05	0.018915139	0	0.027450981	576.0336	990.0186	637.1813	0.9913	3.4804	1872	0.844861282	0.00195163	62.3425568	0.144011306
32.22894987	×ÔÉí³µÁ¾	Road 1	554.5709236	70.05562592	-4.74E-05	0.252937198	0	0.019607844	576.4428	990.0195	637.1603	0.9977	3.4739	1873	0.918810274	0.002122452	62.35784867	0.14404663
32.2455578	×ÔÉí³µÁ¾	Road 1	554.8941513	70.06411285	-5.27E-05	0.289108545	0	0.011764706	576.7351	990.0195	637.1453	1.003	3.4686	1874	1.154341452	0.002666529	62.37701988	0.144090916
32.26229035	×ÔÉí³µÁ¾	Road 1	555.2198394	70.07160416	-5.73E-05	0.252037585	0	0.011764706	577.0079	990.0205	637.1313	1.007	3.4646	1875	1.116099753	0.00257819	62.39569508	0.144134056
32.27889131	×ÔÉí³µÁ¾	Road 1	555.5429904	70.07689819	-6.09E-05	0.200325251	0	0.011764706	577.3003	990.0205	637.1163	1.0123	3.4593	1876	1.038161631	0.002398153	62.41292956	0.144173867
32.29558501	×ÔÉí³µÁ¾	Road 1	555.8679727	70.08250122	-6.50E-05	0.207467288	0	0.011764706	577.7291	990.0215	637.0943	1.0192	3.4525	1877	1.048357103	0.002421705	62.43043052	0.144214295
32.31221933	×ÔÉí³µÁ¾	Road 1	556.1918231	70.08771973	-6.79E-05	0.241991892	0	0.011764706	578.0021	990.0215	637.0803	1.0241	3.4475	1878	1.03513824	0.002391169	62.44764934	0.14425407
32.32894199	×ÔÉí³µÁ¾	Road 1	556.517423	70.0940918	-6.97E-05	0.257021815	0	0.011764706	578.275	990.0225	637.0663	1.0281	3.4435	1879	1.075983783	0.002485523	62.46564265	0.144295635
32.34554698	×ÔÉí³µÁ¾	Road 1	556.8407709	70.10255127	-7.11E-05	0.241161883	0	0.011764706	578.548	990.0225	637.0524	1.033	3.4386	1880	1.153862884	0.002665423	62.48480254	0.144339894
32.36228357	×ÔÉí³µÁ¾	Road 1	557.1667085	70.10839462	-7.16E-05	0.211351916	0	0.011764706	578.9769	990.0234	637.0303	1.0399	3.4318	1881	1.056811773	0.002441235	62.50248996	0.144380752
32.37891019	×ÔÉí³µÁ¾	Road 1	557.4905247	70.11278229	-7.21E-05	0.21663408	0	0.011764706	579.2499	990.0234	637.0164	1.0448	3.4268	1882	1.005213404	0.002322043	62.51920326	0.14441936
32.39560353	×ÔÉí³µÁ¾	Road 1	557.8156638	70.11784973	-7.28E-05	0.232454449	0	0.011764706	579.5229	990.0244	637.0023	1.0488	3.4228	1883	1.029299193	0.002377681	62.5363857	0.144459051
32.41220852	×ÔÉí³µÁ¾	Road 1	558.1391223	70.12652206	-7.40E-05	0.240122929	0	0.011764706	579.9326	990.0244	636.9813	1.0562	3.4154	1884	1.161922656	0.002684041	62.55567941	0.144503619
32.42888096	×ÔÉí³µÁ¾	Road 1	558.463922	70.13244095	-7.51E-05	0.230595753	0	0.011764706	580.2252	990.0254	636.9663	1.0606	3.4111	1885	1.060630974	0.002450058	62.57336272	0.144544468
32.44565347	×ÔÉí³µÁ¾	Road 1	558.7907066	70.14004898	-7.66E-05	0.221148163	0	0.011764706	580.6348	990.0254	636.9453	1.068	3.4036	1886	1.120468582	0.002588282	62.59215579	0.14458788
32.46221887	×ÔÉí³µÁ¾	Road 1	559.1134791	70.14503403	-7.81E-05	0.225952983	0	0.011764706	580.908	990.0264	636.9313	1.072	3.3996	1887	1.02798795	0.002374652	62.60918483	0.144627217
32.47891477	×ÔÉí³µÁ¾	Road 1	559.4388202	70.15065079	-8.04E-05	0.233182341	0	0.011764706	581.2006	990.0264	636.9163	1.0773	3.3943	1888	1.049556637	0.002424476	62.62670812	0.144667696
32.49559235	×ÔÉí³µÁ¾	Road 1	559.7638429	70.15898666	-8.39E-05	0.2324844	0	0.011764706	581.6104	990.0273	636.8953	1.0838	3.3878	1889	1.148713349	0.002653528	62.64586587	0.14471195
32.51235862	×ÔÉí³µÁ¾	Road 1	560.0906187	70.16423264	-8.82E-05	0.228548437	0	0.011764706	581.8836	990.0273	636.8812	1.0888	3.3829	1890	1.035436882	0.002391859	62.66322629	0.144752053
32.52888994	×ÔÉí³µÁ¾	Road 1	560.4128509	70.17202606	-9.32E-05	0.226102799	0	0.011764706	582.2935	990.0283	636.8602	1.0952	3.3764	1891	1.131655953	0.002614125	62.68193405	0.144795268
32.545617	×ÔÉí³µÁ¾	Road 1	560.7389227	70.1772171	-9.91E-05	0.228629753	0	0.011764706	582.5667	990.0283	636.8462	1.1002	3.3715	1892	1.034026409	0.002388601	62.69923027	0.144835222
32.56223555	×ÔÉí³µÁ¾	Road 1	561.0629039	70.1825386	-0.000104315	0.231016338	0	0.011764706	582.84	990.0293	636.8322	1.1042	3.3675	1893	1.04007197	0.002402566	62.71651477	0.144875149
32.57894392	×ÔÉí³µÁ¾	Road 1	561.388675	70.19095688	-0.000110099	0.22949861	0	0.011764706	583.2695	990.0293	636.8102	1.112	3.3597	1894	1.151532449	0.00266004	62.73575499	0.144919594
32.59558813	×ÔÉí³µÁ¾	Road 1	561.7132197	70.19620972	-0.000115441	0.227869332	0	0.011764706	583.5428	990.0303	636.7961	1.116	3.3557	1895	1.037414244	0.002396427	62.75302193	0.144959481
32.61221805	×ÔÉí³µÁ¾	Road 1	562.0375093	70.20133209	-0.000120506	0.227371126	0	0.011764706	583.8162	990.0303	636.7821	1.1209	3.3507	1896	1.032873567	0.002385938	62.77019854	0.144999159
32.62893448	×ÔÉí³µÁ¾	Road 1	562.3635226	70.20926971	-0.000123887	0.229208991	0	0.011764706	584.2263	990.0313	636.7611	1.1274	3.3442	1897	1.134163234	0.002619917	62.7891577	0.145042954
32.64557796	×ÔÉí³µÁ¾	Road 1	562.6881379	70.21456375	-0.000126638	0.229987681	0	0.011764706	584.4996	990.0313	636.747	1.1324	3.3393	1898	1.039117412	0.002400361	62.80645223	0.145082905
32.66222914	×ÔÉí³µÁ¾	Road 1	563.0129274	70.21978912	-0.000128494	0.229706913	0	0.011764706	584.7731	990.0322	636.733	1.1364	3.3353	1899	1.036580955	0.002394502	62.82371252	0.145122776
32.67885979	×ÔÉí³µÁ¾	Road 1	563.3373554	70.2282074	-0.000129429	0.227988899	0	0.011764706	585.2028	990.0322	636.7109	1.1442	3.3275	1900	1.153413114	0.002664384	62.84289454	0.145167086
32.6956345	×ÔÉí³µÁ¾	Road 1	563.6646176	70.23334351	-0.000132023	0.227799147	0	0.011764706	585.4763	990.0332	636.6969	1.1482	3.3235	1901	1.032090982	0.00238413	62.86020756	0.145207079
32.71227835	×ÔÉí³µÁ¾	Road 1	563.9893514	70.23865814	-0.000133213	0.22839807	0	0.011764706	585.7498	990.0332	636.6829	1.1531	3.3185	1902	1.040117995	0.002402673	62.87751913	0.145247069
32.72886428	×ÔÉí³µÁ¾	Road 1	564.3129925	70.24675369	-0.000136342	0.229198709	0	0.011764706	586.1796	990.0342	636.6608	1.16	3.3117	1903	1.142656199	0.002639536	62.89647115	0.145290848
32.74556824	×ÔÉí³µÁ¾	Road 1	564.6389619	70.25217819	-0.000139273	0.227839097	0	0.011764706	586.4531	990.0342	636.6469	1.1649	3.3067	1904	1.043555559	0.002410613	62.91390266	0.145331115
32.76224105	×ÔÉí³µÁ¾	Road 1	564.964347	70.25730057	-0.000142996	0.228068799	0	0.011764706	586.7267	990.0342	636.6328	1.1699	3.3017	1905	1.032976813	0.002386176	62.93112528	0.145370899
32.77889883	×ÔÉí³µÁ¾	Road 1	565.2894754	70.26521759	-0.000145767	0.227838799	0	0.011764706	587.1371	990.0352	636.6117	1.1764	3.2953	1906	1.135092264	0.002622063	62.9500334	0.145414577
32.79555587	×ÔÉí³µÁ¾	Road 1	565.6146136	70.2704155	-0.000149604	0.227319762	0	0.011764706	587.4108	990.0361	636.5977	1.1804	3.2913	1907	1.036043653	0.002393261	62.96729082	0.145454442
32.81221988	×ÔÉí³µÁ¾	Road 1	565.9399234	70.27812653	-0.000153245	0.227519497	0	0.011764706	587.8212	990.0361	636.5767	1.1878	3.2838	1908	1.127630877	0.002604827	62.98608167	0.145497849
32.82892201	×ÔÉí³µÁ¾	Road 1	566.2660033	70.28368835	-0.000158281	0.227100059	0	0.011764706	588.1144	990.0371	636.5616	1.1921	3.2795	1909	1.048904434	0.002422969	63.00360061	0.145538317
32.84563587	×ÔÉí³µÁ¾	Road 1	566.5923361	70.28886566	-0.000166455	0.227480978	0	0.011764706	588.3881	990.0371	636.5476	1.1971	3.2745	1910	1.034843988	0.00239049	63.02089685	0.145578272
32.862235	×ÔÉí³µÁ¾	Road 1	566.9164545	70.29441376	-0.000173762	0.227011874	0	0.011764706	588.6814	990.0371	636.5325	1.2024	3.2692	1911	1.049771404	0.002424972	63.03832214	0.145618524
32.8789221	×ÔÉí³µÁ¾	Road 1	567.242326	70.30204926	-0.000181574	0.226815328	0	0.011764706	589.092	990.0381	636.5115	1.2088	3.2627	1912	1.124773918	0.002598228	63.05709136	0.145661881
32.89558648	×ÔÉí³µÁ¾	Road 1	567.567778	70.30728836	-0.000192349	0.226506859	0	0.011764706	589.3658	990.0381	636.4974	1.2138	3.2577	1913	1.037848492	0.00239743	63.07438646	0.145701833
32.91222373	×ÔÉí³µÁ¾	Road 1	567.8927362	70.31507492	-0.000203225	0.22583665	0	0.011764706	589.7765	990.0391	636.4764	1.2202	3.2512	1914	1.131276631	0.002613249	63.09320779	0.14574531
32.9289156	×ÔÉí³µÁ¾	Road 1	568.2187866	70.32056808	-0.000214832	0.225767568	0	0.011764706	590.0698	990.04	636.4613	1.2245	3.2469	1915	1.04692213	0.00241839	63.11068288	0.145785677
32.94560343	×ÔÉí³µÁ¾	Road 1	568.5447815	70.32558746	-0.000228238	0.225577816	0	0.011764706	590.3437	990.04	636.4473	1.2295	3.2419	1916	1.029770333	0.002378769	63.12786751	0.145825374
32.9622953	×ÔÉí³µÁ¾	Road 1	568.8708909	70.33326416	-0.000243259	0.225957319	0	0.011764706	590.7545	990.041	636.4262	1.2359	3.2354	1917	1.126560789	0.002602355	63.14667192	0.145868812
32.97886364	×ÔÉí³µÁ¾	Road 1	569.1946102	70.33835907	-0.00025633	0.225537866	0	0.011764706	591.0284	990.041	636.4121	1.2409	3.2304	1918	1.03399238	0.002388522	63.16380345	0.145908386
32.99556724	×ÔÉí³µÁ¾	Road 1	569.5209959	70.34344711	-0.000271393	0.225457132	0	0.011764706	591.3023	990.041	636.3981	1.2458	3.2255	1919	1.032281912	0.002384571	63.18104627	0.145948217
33.01226497	×ÔÉí³µÁ¾	Road 1	569.8473025	70.35108261	-0.00028386	0.225036457	0	0.011764706	591.7132	990.042	636.3771	1.2523	3.219	1920	1.12517209	0.002599148	63.1998341	0.145991617
33.02890002	×ÔÉí³µÁ¾	Road 1	570.1724076	70.35615692	-0.000295077	0.225410387	0	0.011764706	591.9871	990.042	636.3629	1.2572	3.214	1921	1.032675447	0.00238548	63.2170127	0.146031299
33.04562378	×ÔÉí³µÁ¾	Road 1	570.4992699	70.3612381	-0.000309928	0.224552661	0	0.011764706	592.2611	990.043	636.3489	1.2612	3.21	1922	1.031994205	0.002383907	63.23427153	0.146071167
33.06225003	×ÔÉí³µÁ¾	Road 1	570.8242518	70.3667244	-0.00032354	0.224232242	0	0.011764706	592.5547	990.043	636.3339	1.2665	3.2047	1923	1.047951004	0.002420767	63.25169502	0.146111416
33.07889975	×ÔÉí³µÁ¾	Road 1	571.1497307	70.37502594	-0.000339769	0.224692792	0	0.011764706	593.0049	990.0439	636.3108	1.2737	3.1975	1924	1.150581488	0.002657843	63.27085188	0.146155668
33.09553443	×ÔÉí³µÁ¾	Road 1	571.4749387	70.37997665	-0.000361619	0.224407867	0	0.011764706	593.2789	990.0439	636.2967	1.2786	3.1925	1925	1.028408806	0.002375624	63.28795913	0.146195186
33.112223	×ÔÉí³µÁ¾	Road 1	571.8012351	70.38752289	-0.000381972	0.224388748	0	0.011764706	593.69	990.0449	636.2756	1.2851	3.186	1926	1.12249899	0.002592973	63.30669203	0.146238459
33.12885072	×ÔÉí³µÁ¾	Road 1	572.126365	70.392556	-0.000402575	0.22391881	0	0.011764706	593.9641	990.0459	636.2616	1.289	3.182	1927	1.031629154	0.002383063	63.32384568	0.146278084
33.14555615	×ÔÉí³µÁ¾	Road 1	572.4530376	70.39755478	-0.00042494	0.223937005	0	0.011764706	594.2382	990.0459	636.2475	1.294	3.177	1928	1.029574296	0.002378317	63.34104516	0.146317814
33.16223775	×ÔÉí³µÁ¾	Road 1	572.7792793	70.40510101	-0.000444909	0.2238774	0	0.011764706	594.6495	990.0469	636.2264	1.3005	3.1706	1929	1.122819257	0.002593712	63.35977558	0.146361082
33.17893658	×ÔÉí³µÁ¾	Road 1	573.105881	70.41008606	-0.000464396	0.222998291	0	0.011764706	594.9236	990.0469	636.2123	1.3054	3.1657	1930	1.029275733	0.002377627	63.37696328	0.146400785
33.195675	×ÔÉí³µÁ¾	Road 1	573.4332802	70.41507111	-0.000483878	0.223807648	0	0.011764706	595.1978	990.0469	636.1982	1.3104	3.1607	1931	1.028897735	0.002376754	63.39418541	0.146440568
33.21220485	×ÔÉí³µÁ¾	Road 1	573.7566378	70.42335892	-0.000501583	0.223548323	0	0.011764706	595.6483	990.0479	636.1752	1.3175	3.1536	1932	1.152860381	0.002663107	63.41324202	0.146484589
33.22885603	×ÔÉí³µÁ¾	Road 1	574.0823916	70.42826843	-0.000516761	0.223318666	0	0.011764706	595.9225	990.0488	636.1611	1.3215	3.1496	1933	1.027223376	0.002372886	63.4303465	0.1465241
33.24560215	×ÔÉí³µÁ¾	Road 1	574.4100259	70.43323288	-0.000532242	0.222893506	0	0.011764706	596.1968	990.0488	636.147	1.3265	3.1447	1934	1.028253726	0.002375266	63.44756575	0.146563877
33.26227679	×ÔÉí³µÁ¾	Road 1	574.7362847	70.43821106	-0.00054558	0.223271474	0	0.011764706	596.4711	990.0498	636.1329	1.3304	3.1407	1935	1.029580036	0.00237833	63.46473363	0.146603535
33.27885246	×ÔÉí³µÁ¾	Road 1	575.0606467	70.44681473	-0.000561006	0.222155735	0	0.011764706	596.9413	990.0498	636.1089	1.3389	3.1323	1936	1.16390029	0.00268861	63.48402606	0.1466481
33.29554543	×ÔÉí³µÁ¾	Road 1	575.3873154	70.44927292	-0.000581809	0.222145781	0	0.011764706	597.0785	990.0508	636.1018	1.3404	3.1308	1937	0.937591625	0.002165837	63.49967724	0.146684254
33.31223509	×ÔÉí³µÁ¾	Road 1	575.7139508	70.45602264	-0.000602467	0.222958535	0	0.011764706	597.4508	990.0508	636.0828	1.3472	3.1241	1938	1.094225697	0.002527661	63.51793951	0.14672644
33.32890643	×ÔÉí³µÁ¾	Road 1	576.040265	70.46411133	-0.000623608	0.222440258	0	0.011764706	597.9016	990.0518	636.0596	1.3543	3.1169	1939	1.14349021	0.002641462	63.53700302	0.146770477
33.34554808	×ÔÉí³µÁ¾	Road 1	576.3660207	70.46899338	-0.000647976	0.223139167	0	0.011764706	598.176	990.0518	636.0455	1.3593	3.112	1940	1.026741696	0.002371773	63.5540897	0.146809947
33.36220806	×ÔÉí³µÁ¾	Road 1	576.6921579	70.47392349	-0.000668762	0.221831262	0	0.011764706	598.4504	990.0527	636.0315	1.3633	3.108	1941	1.028352975	0.002375495	63.57122203	0.146849523
33.37890066	×ÔÉí³µÁ¾	Road 1	577.0189586	70.47927933	-0.000695003	0.222829789	0	0.011764706	598.7444	990.0527	636.0164	1.3687	3.1027	1942	1.043588641	0.00241069	63.58864224	0.146889764
33.39558446	×ÔÉí³µÁ¾	Road 1	577.3456258	70.4876564	-0.000727092	0.221766993	0	0.011764706	599.2149	990.0537	635.9922	1.3763	3.0951	1943	1.154079691	0.002665924	63.60789668	0.146934241
33.4122624	×ÔÉí³µÁ¾	Road 1	577.6722011	70.49257278	-0.000757108	0.222595781	0	0.011764706	599.4894	990.0547	635.9781	1.3803	3.091	1944	1.02784999	0.002374333	63.6250391	0.14697384
33.42890772	×ÔÉí³µÁ¾	Road 1	577.9981607	70.49759903	-0.000791066	0.221487656	0	0.011764706	599.7639	990.0547	635.9641	1.3853	3.086	1945	1.032274708	0.002384555	63.64222164	0.147013532
33.44556953	×ÔÉí³µÁ¾	Road 1	578.3244725	70.5038887	-0.000832491	0.221867338	0	0.011764706	600.058	990.0557	635.949	1.3897	3.0816	1946	1.078355513	0.002491001	63.66018899	0.147055037
33.46228669	×ÔÉí³µÁ¾	Road 1	578.6518972	70.51012344	-0.000873662	0.222092479	0	0.011764706	600.4699	990.0557	635.9279	1.3972	3.074	1947	1.07566068	0.002484776	63.67817098	0.147096575
33.47887005	×ÔÉí³µÁ¾	Road 1	578.9767357	70.51755295	-0.000920493	0.221798852	0	0.011764706	600.8818	990.0566	635.9067	1.4038	3.0673	1948	1.121477316	0.002590613	63.69676885	0.147139536
33.4955205	×ÔÉí³µÁ¾	Road 1	579.302899	70.51992188	-0.000973459	0.222028404	0	0.011764706	601.019	990.0566	635.8997	1.4063	3.0647	1949	0.935193121	0.002160296	63.71234023	0.147175506
33.51228385	×ÔÉí³µÁ¾	Road 1	579.6313034	70.52623215	-0.001017265	0.222058252	0	0.011764706	601.3721	990.0576	635.8816	1.4117	3.0591	1950	1.077957566	0.002490082	63.73041041	0.147217248
33.52882249	×ÔÉí³µÁ¾	Road 1	579.9553331	70.53219223	-0.001061413	0.221964329	0	0.011764706	601.7056	990.0586	635.8645	1.4168	3.054	1951	1.068235325	0.002467624	63.74807758	0.147258059
33.54558437	×ÔÉí³µÁ¾	Road 1	580.2837738	70.54021225	-0.001104862	0.221535444	0	0.011764706	602.1569	990.0586	635.8413	1.4251	3.0459	1952	1.140306721	0.002634109	63.76719126	0.147302212
33.56219523	×ÔÉí³µÁ¾	Road 1	580.6092788	70.54528656	-0.001141462	0.220996514	0	0.011764706	602.4316	990.0596	635.8273	1.4291	3.0419	1953	1.034915864	0.002390656	63.7843821	0.147341923
33.57890469	×ÔÉí³µÁ¾	Road 1	580.9367393	70.55032654	-0.00117478	0.221459776	0	0.011764706	602.7259	990.0605	635.8121	1.4335	3.0375	1954	1.032616709	0.002385345	63.80163657	0.14738178
33.59553131	×ÔÉí³µÁ¾	Road 1	581.2625994	70.55531158	-0.00120978	0.221629992	0	0.011764706	603.0006	990.0605	635.7981	1.4385	3.0326	1955	1.031570447	0.002382928	63.8187881	0.147421401
33.61222172	×ÔÉí³µÁ¾	Road 1	581.5897369	70.56121674	-0.001235953	0.220767587	0	0.011764706	603.3343	990.0615	635.781	1.4437	3.0275	1956	1.064546728	0.002459103	63.83655581	0.147462444
33.62971964	×ÔÉí³µÁ¾	Road 1	581.9327445	70.5699234	-0.001253965	0.221167699	0	0.011764706	603.825	990.0625	635.7558	1.4527	3.0196	1957	1.152316027	0.00266185	63.85671895	0.147509021
33.66226286	×ÔÉí³µÁ¾	Road 1	582.570778	70.58061447	-0.001272151	0.221269101	0	0.011764706	604.4335	990.0635	635.7246	1.4626	3.0096	1958	1.049327344	0.002423946	63.89086744	0.147587904
33.67886456	×ÔÉí³µÁ¾	Road 1	582.8962886	70.58546219	-0.001286176	0.22089915	0	0.011764706	604.7083	990.0645	635.7105	1.4665	3.0056	1959	1.027112112	0.002372629	63.90791925	0.147627293
33.69556155	×ÔÉí³µÁ¾	Road 1	583.2236905	70.59033737	-0.001316733	0.221687675	0	0.011764706	604.9832	990.0645	635.6964	1.4714	3.0006	1960	1.027149027	0.002372714	63.92506955	0.147666911
33.71217571	×ÔÉí³µÁ¾	Road 1	583.5494939	70.595961	-0.001329976	0.220169321	0	0.011764706	605.2974	990.0654	635.6803	1.476	2.9959	1961	1.055576693	0.002438382	63.94260707	0.147707422
33.72884045	×ÔÉí³µÁ¾	Road 1	583.8763263	70.60393982	-0.001344422	0.221388489	0	0.011764706	605.749	990.0664	635.6571	1.4832	2.9887	1962	1.141259222	0.002636309	63.96162586	0.147751356
33.74553415	×ÔÉí³µÁ¾	Road 1	584.203749	70.60878754	-0.00136347	0.220562235	0	0.011764706	606.0239	990.0664	635.643	1.4882	2.9838	1963	1.026370411	0.002370916	63.97875978	0.147790935
33.7622022	×ÔÉí³µÁ¾	Road 1	584.5307018	70.61597672	-0.001380426	0.221122593	0	0.011764706	606.4364	990.0674	635.6218	1.4947	2.9773	1964	1.112437009	0.002569729	63.99730193	0.147833767
33.77884934	×ÔÉí³µÁ¾	Road 1	584.857256	70.61840744	-0.001400958	0.220699042	0	0.011764706	606.5739	990.0684	635.6148	1.4962	2.9757	1965	0.938362852	0.002167618	64.01292299	0.147869852
33.79573585	×ÔÉí³µÁ¾	Road 1	585.1885449	70.62679825	-0.001424009	0.220892489	0	0.011764706	607.0453	990.0693	635.5907	1.5037	2.9682	1966	1.152583404	0.002662468	64.0323861	0.147914812
33.81217773	×ÔÉí³µÁ¾	Road 1	585.5111329	70.63164597	-0.001448484	0.220405132	0	0.011764706	607.3204	990.0693	635.5765	1.5087	2.9632	1967	1.029320301	0.00237773	64.04931006	0.147953906
33.82887473	×ÔÉí³µÁ¾	Road 1	585.8387484	70.63639069	-0.001473237	0.220243394	0	0.011764706	607.5954	990.0703	635.5624	1.5127	2.9591	1968	1.022854069	0.002362793	64.06638865	0.147993358
33.84559482	×ÔÉí³µÁ¾	Road 1	586.1668542	70.64441071	-0.001513908	0.220346093	0	0.011764706	608.0473	990.0713	635.5392	1.5208	2.9529	1969	1.142278008	0.002638662	64.08548765	0.148037476
33.86220824	×ÔÉí³µÁ¾	Road 1	586.4928892	70.64925156	-0.001555322	0.220387056	0	0.011764706	608.3224	990.0723	635.5251	1.5248	2.9489	1970	1.027391025	0.002373273	64.10255613	0.148076905
33.87880627	×ÔÉí³µÁ¾	Road 1	586.818644	70.65398941	-0.001612545	0.220115677	0	0.011764706	608.5975	990.0723	635.511	1.5298	2.9439	1971	1.023816146	0.002365015	64.11954946	0.148116159
33.89555166	×ÔÉí³µÁ¾	Road 1	587.1473264	70.66166611	-0.001690568	0.220728159	0	0.011764706	609.0299	990.0742	635.4889	1.5357	2.938	1972	1.129522747	0.002609198	64.13846375	0.148159851
33.91224316	×ÔÉí³µÁ¾	Road 1	587.4749735	70.66647949	-0.001765713	0.220251292	0	0.011764706	609.3051	990.0742	635.4747	1.5406	2.933	1973	1.025731232	0.002369439	64.15558475	0.148199401
33.9288126	×ÔÉí³µÁ¾	Road 1	587.8002578	70.67370987	-0.001845806	0.220665321	0	0.011764706	609.7178	990.0752	635.4536	1.5471	2.9264	1974	1.116187273	0.002578393	64.17407934	0.148242123
33.94565768	×ÔÉí³µÁ¾	Road 1	588.1309761	70.67851639	-0.001959659	0.220192686	0	0.011764706	609.993	990.0762	635.4395	1.5511	2.9224	1975	1.023999976	0.00236544	64.19132871	0.148281969
33.98007108	×ÔÉí³µÁ¾	Road 1	588.8067136	70.68919373	-0.002069167	0.219733447	0	0.011764706	610.6025	990.0781	635.4082	1.5603	2.9133	1976	1.039330822	0.002400854	64.22709561	0.148364591
33.99555037	×ÔÉí³µÁ¾	Road 1	589.1106904	70.69547653	-0.002190392	0.219893441	0	0.011764706	610.8778	990.0781	635.3942	1.5653	2.9083	1977	1.097817184	0.002535958	64.24408905	0.148403846
34.01224884	×ÔÉí³µÁ¾	Road 1	589.4386369	70.70156021	-0.002522439	0.220046684	0	0.011764706	611.3104	990.0801	635.3719	1.5721	2.9024	1978	1.072494831	0.002477463	64.26199807	0.148445216
34.02881864	×ÔÉí³µÁ¾	Road 1	589.7640784	70.7062912	-0.002672934	0.220284149	0	0.011764706	611.5857	990.0811	635.3578	1.5762	2.8984	1979	1.024395856	0.002366354	64.27897211	0.148484426
34.04557759	×ÔÉí³µÁ¾	Road 1	590.0932691	70.71364517	-0.002875332	0.219728976	0	0.011764706	611.9987	990.082	635.3367	1.5827	2.8918	1980	1.118139574	0.002582902	64.29771095	0.148527712
34.06222181	×ÔÉí³µÁ¾	Road 1	590.4202295	70.71872635	-0.003078002	0.219966322	0	0.011764706	612.2938	990.083	635.3215	1.5871	2.8875	1981	1.036600681	0.002394548	64.31496435	0.148567568
34.07883486	×ÔÉí³µÁ¾	Road 1	590.7466	70.7235054	-0.003298085	0.21905674	0	0.011764706	612.5692	990.083	635.3074	1.5921	2.8825	1982	1.02588608	0.002369797	64.33200746	0.148606937
34.1141104	×ÔÉí³µÁ¾	Road 1	591.4397243	70.73593369	-0.003573166	0.219186872	0	0.011764706	613.2774	990.0859	635.2711	1.602	2.8725	1983	1.06552218	0.002461356	64.36959432	0.148693763
34.12885548	×ÔÉí³µÁ¾	Road 1	591.7294678	70.74061661	-0.00382942	0.2193349	0	0.011764706	613.5529	990.0869	635.257	1.607	2.8685	1984	1.044354657	0.002412459	64.38499342	0.148729335
34.14562873	×ÔÉí³µÁ¾	Road 1	592.0590992	70.74797745	-0.004402651	0.218795344	0	0.011764706	613.9661	990.0879	635.2358	1.6135	2.862	1985	1.118558412	0.00258387	64.40375527	0.148772675
34.16224472	×ÔÉí³µÁ¾	Road 1	592.3856635	70.75301056	-0.004648092	0.219401047	0	0.011764706	614.2612	990.0889	635.2207	1.6179	2.8576	1986	1.035506244	0.002392019	64.42096123	0.14881242
34.17888453	×ÔÉí³µÁ¾	Road 1	592.712718	70.75776901	-0.004905133	0.219319195	0	0.011764706	614.5367	990.0898	635.2065	1.622	2.8535	1987	1.025197946	0.002368207	64.43802034	0.148851827
34.19554194	×ÔÉí³µÁ¾	Road 1	593.0401463	70.76381836	-0.005204404	0.219525009	0	0.011764706	614.8123	990.0908	635.1924	1.626	2.8495	1988	1.07246385	0.002477391	64.45588481	0.148893094
34.2121638	×ÔÉí³µÁ¾	Road 1	593.3669041	70.76995697	-0.005450131	0.219023287	0	0.011764706	615.2453	990.0928	635.1702	1.6329	2.8436	1989	1.076290087	0.00248623	64.47377475	0.14893442
34.24560435	×ÔÉí³µÁ¾	Road 1	594.0243786	70.77957687	-0.005677212	0.219127908	0	0.011764706	615.7965	990.0947	635.142	1.6409	2.8355	1990	1.026457614	0.002371117	64.50810006	0.149013711
34.26215729	×ÔÉí³µÁ¾	Road 1	594.3498633	70.78772736	-0.005901539	0.219062135	0	0.011764706	616.269	990.0967	635.1177	1.6476	2.8289	1991	1.151770597	0.00266059	64.52716525	0.149057752
34.27880884	×ÔÉí³µÁ¾	Road 1	594.6772976	70.79002075	-0.00624278	0.219233096	0	0.011764706	616.4069	990.0977	635.1107	1.6491	2.8274	1992	0.934845374	0.002159493	64.54273187	0.149093711
34.2955073	×ÔÉí³µÁ¾	Road 1	595.0056832	70.79622116	-0.006370913	0.218534485	0	0.011764706	616.7613	990.0986	635.0925	1.6555	2.823	1993	1.077805641	0.002489731	64.56072957	0.149135285
34.31218927	×ÔÉí³µÁ¾	Road 1	595.3337743	70.8026619	-0.006449897	0.218904078	0	0.011764706	617.1354	990.1006	635.0734	1.6604	2.8182	1994	1.086915129	0.002510774	64.57886146	0.14917717
34.32885145	×ÔÉí³µÁ¾	Road 1	595.661498	70.80739288	-0.006491225	0.21885781	0	0.011764706	617.4111	990.1025	635.0592	1.6634	2.8151	1995	1.024463118	0.00236651	64.59593124	0.149216601
34.3456082	×ÔÉí³µÁ¾	Road 1	595.9911086	70.81316071	-0.00651036	0.218420044	0	0.011764706	617.746	990.1035	635.042	1.6695	2.8101	1996	1.06140447	0.002451844	64.61371693	0.149257686
34.36213805	×ÔÉí³µÁ¾	Road 1	596.3162825	70.81891479	-0.006519941	0.218820795	0	0.011764706	618.0808	990.1055	635.0249	1.6736	2.806	1997	1.063849461	0.002457492	64.6313022	0.149298308
[truncated: 2,347 more rows]
