# Supplementary material for: Influence of Landscape Design on Driving Behavior Based on Slope Illusion
Source: Hindawi journal article supplement (doi:10.1155/2022/6407145), 2022-01-12
Supplement: f1 [file 6407145.f1.zip › 5.txt]

CO2 emission report
0.3	0.028	0.056	0.00231
Time(s)	Vehicle Name	Road Name	Travelled Distance (m)	Speed(km/h)	Steering Wheel Angle(-1..1)	Acceleration(m/s^2)	Accelerate (0..1)	Brake (0..1)	X Pos(m)	Y Pos(m)	Z Pos(m)	Distance to the left border(m)	Distance to the right border(m)	Measurement Point Number	Gasoline Consumption(cc/sec)	Carbon Dioxide Emission(kg/sec)	Progressive Gasoline Consumption(cc)	Progressive Carbon Dioxide Emission(kg)
0			0	0	0	0	0	0	0	10000	0	NAN	NAN	1	0	0	0	0
11.73782291	×ÔÉí³µÁ¾	Road 1	0.067333098	0.020651117	0	0.503822565	0	0	17.2787	977.0928	655.7373	3.8317	0.7021	2	0.300160777	0.000693371	3.523234043	0.008138671
11.75276851	×ÔÉí³µÁ¾	Road 1	0.067583714	0.060366869	0	0.502462387	0	0	17.279	977.0928	655.7373	3.8317	0.7021	3	0.301399801	0.000696234	3.527738642	0.008149076
11.7826333	×ÔÉí³µÁ¾	Road 1	0.068337193	0.090826819	0	0.506703138	0	0	17.2794	977.0928	655.7373	3.8317	0.7021	4	0.301372756	0.000696171	3.536739078	0.008169867
11.84930547	×ÔÉí³µÁ¾	Road 1	0.071991184	0.197299232	0	0.586417913	0	0	17.2821	977.0928	655.7373	3.8317	0.7021	5	0.303522741	0.000701138	3.556975596	0.008216614
11.91594574	×ÔÉí³µÁ¾	Road 1	0.078118517	0.331007016	0	0.66918993	0	0	17.2872	977.0928	655.7373	3.8318	0.702	6	0.307154744	0.000709527	3.577444473	0.008263897
11.93257749	×ÔÉí³µÁ¾	Road 1	0.079851553	0.375121656	0	0.692793846	0	0	17.2892	977.0928	655.7373	3.8319	0.7019	7	0.311010651	0.000718435	3.582617125	0.008275846
11.94922098	×ÔÉí³µÁ¾	Road 1	0.081736999	0.407823631	-0.000822002	0.715959728	0.176470593	0	17.2909	977.0928	655.7373	3.8319	0.7019	8	0.309819246	0.000715682	3.587773596	0.008287757
11.96603381	×ÔÉí³µÁ¾	Road 1	0.083790939	0.439794195	-0.000822002	0.746845007	0.176470593	0	17.2925	977.0928	655.7373	3.8319	0.7019	9	0.310385163	0.00071699	3.592992049	0.008299812
11.98253287	×ÔÉí³µÁ¾	Road 1	0.085971106	0.4756998	-0.000822002	0.774319768	0.176470593	0	17.2943	977.0928	655.7373	3.832	0.7018	10	0.312308667	0.000721433	3.598144848	0.008311715
11.99922803	×ÔÉí³µÁ¾	Road 1	0.088421211	0.528319323	-0.000822002	0.809115469	0.176470593	0	17.2974	977.0928	655.7373	3.832	0.7018	11	0.317782697	0.000734078	3.603450283	0.00832397
12.01588068	×ÔÉí³µÁ¾	Road 1	0.091032926	0.56460548	-0.000822002	0.825419724	0.176470593	0	17.2995	977.0928	655.7373	3.8321	0.7017	12	0.314681747	0.000726915	3.608690567	0.008336075
12.03258244	×ÔÉí³µÁ¾	Road 1	0.093824327	0.60167554	-0.000822002	0.840102196	0.176470593	0	17.3018	977.0928	655.7373	3.8321	0.7017	13	0.315864987	0.000729648	3.61396607	0.008348262
12.04922812	×ÔÉí³µÁ¾	Road 1	0.096818572	0.647572374	-0.000822002	0.854743958	0.176470593	0	17.3047	977.0928	655.7373	3.8321	0.7017	14	0.319920439	0.000739016	3.619291363	0.008360563
12.06593905	×ÔÉí³µÁ¾	Road 1	0.100118558	0.710908931	-0.000822002	0.870187998	0.176470593	0	17.3091	977.0938	655.7373	3.8313	0.7025	15	0.327777271	0.000757165	3.624768826	0.008373216
12.08260379	×ÔÉí³µÁ¾	Road 1	0.103590392	0.750002825	-0.000822002	0.876659155	0.168627456	0	17.3119	977.0938	655.7373	3.8313	0.7025	16	0.320642069	0.000740683	3.630112243	0.008385559
12.09924178	×ÔÉí³µÁ¾	Road 1	0.107238634	0.789378566	-0.000822002	0.881529987	0.168627456	0	17.3149	977.0938	655.7373	3.8314	0.7024	17	0.321881516	0.000743546	3.635467703	0.00839793
12.11584237	×ÔÉí³µÁ¾	Road 1	0.111100408	0.837463278	-0.000822002	0.88558054	0.160784319	0	17.3183	977.0938	655.7373	3.8314	0.7024	18	0.326875195	0.000755082	3.640894025	0.008410465
12.13253241	×ÔÉí³µÁ¾	Road 1	0.115233202	0.891433722	-0.000822002	0.888001084	0.160784319	0	17.3233	977.0938	655.7373	3.8315	0.7023	19	0.331090813	0.00076482	3.646419943	0.00842323
12.14930602	×ÔÉí³µÁ¾	Road 1	0.119572391	0.931289148	-0.000822002	0.889219701	0.152941182	0	17.3269	977.0938	655.7373	3.8316	0.7022	20	0.325957273	0.000752961	3.651887423	0.00843586
12.16585859	×ÔÉí³µÁ¾	Road 1	0.124050915	0.974028754	-0.000822002	0.889619827	0.152941182	0	17.3309	977.0938	655.7373	3.8316	0.7022	21	0.328833436	0.000759605	3.657330463	0.008448433
12.18258968	×ÔÉí³µÁ¾	Road 1	0.128802869	1.022469878	-0.000822002	0.889609814	0.152941182	0	17.3356	977.0938	655.7373	3.8317	0.7021	22	0.332929645	0.000769067	3.662900739	0.008461301
12.19928008	×ÔÉí³µÁ¾	Road 1	0.133767714	1.070881498	-0.000822002	0.888799787	0.152941182	0	17.3405	977.0938	655.7373	3.8318	0.702	23	0.334565705	0.000772847	3.668484774	0.0084742
12.23738873	×ÔÉí³µÁ¾	Road 1	0.146368192	1.190326273	-0.000822002	0.88717103	0.152941182	0	17.3537	977.0938	655.7373	3.8321	0.7017	24	0.339882463	0.000785128	3.681437234	0.00850412
12.27074937	×ÔÉí³µÁ¾	Road 1	0.158266196	1.283932579	-0.000822002	0.885149896	0.152941182	0	17.3651	977.0947	655.7373	3.8313	0.7025	25	0.339984596	0.000785364	3.692779338	0.00853032
12.30414593	×ÔÉí³µÁ¾	Road 1	0.171069353	1.380122924	-0.000822002	0.883100986	0.152941182	0	17.3777	977.0947	655.7373	3.8315	0.7023	26	0.34388982	0.000794385	3.704264077	0.00855685
12.33795891	×ÔÉí³µÁ¾	Road 1	0.184907572	1.473327756	-0.000822002	0.882699549	0.160784319	0	17.3908	977.0947	655.7373	3.8318	0.702	27	0.345445875	0.00079798	3.715944629	0.008583832
12.37071949	×ÔÉí³µÁ¾	Road 1	0.199292117	1.580690789	-0.000822002	0.883090615	0.168627456	0	17.4069	977.0947	655.7373	3.832	0.7018	28	0.355541439	0.000821301	3.727592376	0.008610738
12.4040937	×ÔÉí³µÁ¾	Road 1	0.214707103	1.662779689	-0.000822002	0.885519624	0.176470593	0	17.42	977.0957	655.7373	3.8313	0.7025	29	0.347404731	0.000802505	3.739186732	0.008637521
12.43767721	×ÔÉí³µÁ¾	Road 1	0.231092618	1.756453049	-0.000822002	0.887940109	0.184313729	0	17.4357	977.0957	655.7373	3.8316	0.7022	30	0.354871218	0.000819753	3.751104552	0.008665052
12.47073397	×ÔÉí³µÁ¾	Road 1	0.247979557	1.839048028	-0.000822002	0.890370607	0.192156866	0	17.4501	977.0957	655.7373	3.8319	0.702	31	0.353121936	0.000815712	3.762777622	0.008692016
12.50396595	×ÔÉí³µÁ¾	Road 1	0.265958342	1.947630715	-0.000822002	0.892791152	0.192156866	0	17.4701	977.0967	655.7373	3.8312	0.7026	32	0.368610318	0.00085149	3.775027273	0.008720313
12.53282749	×ÔÉí³µÁ¾	Road 1	0.282214877	2.027734566	-0.000822002	0.892781138	0.192156866	0	17.4856	977.0967	655.7373	3.8315	0.7023	33	0.36344664	0.000839562	3.7855169	0.008744544
12.56245695	×ÔÉí³µÁ¾	Road 1	0.299586722	2.110690784	-0.000822002	0.891950727	0.192156866	0	17.5023	977.0967	655.7373	3.8318	0.702	34	0.366482526	0.000846575	3.796375581	0.008769628
12.58879401	×ÔÉí³µÁ¾	Road 1	0.31563454	2.193568468	-0.000822002	0.891952038	0.192156866	0	17.5196	977.0977	655.7373	3.8312	0.7026	35	0.375587482	0.000867607	3.806267451	0.008792478
12.62061365	×ÔÉí³µÁ¾	Road 1	0.33578016	2.279228568	-0.000822002	0.891131997	0.192156866	0	17.5383	977.0977	655.7373	3.8315	0.7023	36	0.36975634	0.000854137	3.818032965	0.008819656
12.65135452	×ÔÉí³µÁ¾	Road 1	0.355997795	2.367645979	-0.000822002	0.88991183	0.192156866	0	17.5583	977.0977	655.7373	3.8319	0.702	37	0.376166845	0.000868945	3.829596659	0.008846368
12.67985719	×ÔÉí³µÁ¾	Road 1	0.375374952	2.447411442	-0.000822002	0.8890903	0.192156866	0	17.577	977.0986	655.7373	3.8312	0.7026	38	0.377260998	0.000871473	3.840349606	0.008871208
12.70652782	×ÔÉí³µÁ¾	Road 1	0.394033583	2.518541265	-0.000822002	0.887870133	0.192156866	0	17.5943	977.0986	655.7373	3.8315	0.7023	39	0.376816069	0.000870445	3.850399526	0.008894423
12.73760225	×ÔÉí³µÁ¾	Road 1	0.416582443	2.612305069	-0.000822002	0.887041211	0.192156866	0	17.6178	977.0986	655.7373	3.832	0.7019	40	0.387214532	0.000894466	3.862431997	0.008922218
12.76453972	×ÔÉí³µÁ¾	Road 1	0.436723678	2.691731071	-0.000822002	0.885410964	0.192156866	0	17.6384	977.0996	655.7373	3.8314	0.7025	41	0.38851212	0.000897463	3.872897534	0.008946393
12.79611707	×ÔÉí³µÁ¾	Road 1	0.461104269	2.779528356	-0.000822002	0.884170771	0.192156866	0	17.662	977.0996	655.7373	3.8318	0.702	42	0.387350394	0.000894779	3.885129032	0.008974648
12.82606691	×ÔÉí³µÁ¾	Road 1	0.484910374	2.861517262	-0.000822002	0.882959127	0.192156866	0	17.6847	977.1006	655.7373	3.8312	0.7026	43	0.388983503	0.000898552	3.896779024	0.00900156
12.85386689	×ÔÉí³µÁ¾	Road 1	0.507639494	2.943340945	-0.000822002	0.88091892	0.192156866	0	17.7081	977.1006	655.7373	3.8317	0.7022	44	0.396718612	0.00091642	3.907807795	0.009027036
12.88781916	×ÔÉí³µÁ¾	Road 1	0.536274663	3.036221981	-0.000822002	0.878869653	0.192156866	0	17.7355	977.1016	655.7373	3.8312	0.7027	45	0.394297378	0.000910827	3.921195084	0.009057961
12.92065892	×ÔÉí³µÁ¾	Road 1	0.564815757	3.128765917	-0.000822002	0.874779046	0.184313729	0	17.7638	977.1016	655.7373	3.8317	0.7021	46	0.399404285	0.000922624	3.934311427	0.009088259
12.95044527	×ÔÉí³µÁ¾	Road 1	0.591395137	3.212402987	-0.000822002	0.870307028	0.184313729	0	17.7902	977.1025	655.7373	3.8312	0.7026	47	0.401922106	0.00092844	3.946283221	0.009115914
12.97573838	×ÔÉí³µÁ¾	Road 1	0.614374558	3.270689964	-0.000822002	0.868286669	0.184313729	0	17.8091	977.1025	655.7373	3.8315	0.7023	48	0.389994403	0.000900887	3.956147391	0.0091387
13.00390749	×ÔÉí³µÁ¾	Road 1	0.640637408	3.356381178	-0.000822002	0.864207566	0.184313729	0	17.8377	977.1035	655.7373	3.8311	0.7028	49	0.413215159	0.000954527	3.967787293	0.009165589
13.06745586	×ÔÉí³µÁ¾	Road 1	0.703031191	3.534592724	-0.000822002	0.855624735	0.184313729	0	17.8999	977.1045	655.7373	3.8312	0.7026	50	0.410992921	0.000949394	3.993905225	0.009225921
13.09892984	×ÔÉí³µÁ¾	Road 1	0.734599354	3.610773039	-0.000822002	0.852374017	0.184313729	0	17.9277	977.1045	655.7373	3.8317	0.7021	51	0.402814418	0.000930501	4.006583396	0.009255208
13.1236009	×ÔÉí³µÁ¾	Road 1	0.759789879	3.675800085	-0.000822002	0.84951359	0.184313729	0	17.952	977.1055	655.7373	3.8315	0.7026	52	0.411577029	0.000950743	4.016737439	0.009278663
13.15449352	×ÔÉí³µÁ¾	Road 1	0.792050547	3.75942235	-0.000822002	0.845834374	0.184313729	0	17.984	977.1055	655.7373	3.8321	0.7021	53	0.416204888	0.000961433	4.029595098	0.009308365
13.18048308	×ÔÉí³µÁ¾	Road 1	0.819791813	3.842640781	-0.000822002	0.842153907	0.184313729	0	18.0168	977.1064	655.7373	3.8317	0.7025	54	0.435067657	0.001005006	4.040902317	0.009334484
13.21141236	×ÔÉí³µÁ¾	Road 1	0.853494356	3.922793341	-0.000822002	0.838453233	0.184313729	0	18.0491	977.1074	655.7373	3.8313	0.7028	55	0.417465988	0.000964346	4.053814237	0.009364311
13.24044617	×ÔÉí³µÁ¾	Road 1	0.885689354	3.991966009	-0.000822002	0.836012542	0.184313729	0	18.0777	977.1074	655.7373	3.8318	0.7023	56	0.412528657	0.000952941	4.065791517	0.009391978
13.27058332	×ÔÉí³µÁ¾	Road 1	0.919839517	4.079370403	-0.000822002	0.831921935	0.184313729	0	18.1147	977.1084	655.7373	3.8315	0.7026	57	0.432876973	0.000999946	4.078837194	0.009422114
13.30394506	×ÔÉí³µÁ¾	Road 1	0.958522814	4.174238634	-0.000822002	0.828641593	0.184313729	0	18.156	977.1094	655.7373	3.8313	0.7029	58	0.433880556	0.001002264	4.093312205	0.009455551
13.33341581	×ÔÉí³µÁ¾	Road 1	0.993317059	4.25029192	-0.000822002	0.825361013	0.184313729	0	18.1899	977.1094	655.7373	3.8319	0.7023	59	0.426998908	0.000986367	4.105896182	0.00948462
13.3638473	×ÔÉí³µÁ¾	Road 1	1.029908479	4.32871027	-0.000822002	0.82371074	0.184313729	0	18.2257	977.1104	655.7373	3.8316	0.7026	60	0.429192135	0.000991434	4.118957139	0.009514791
13.38870017	×ÔÉí³µÁ¾	Road 1	1.06018826	4.38610096	-0.000822002	0.822479188	0.184313729	0	18.2523	977.1104	655.7373	3.8321	0.7021	61	0.421071378	0.000972675	4.129421972	0.009538965
13.42068513	×ÔÉí³µÁ¾	Road 1	1.099944021	4.474626732	-0.000822002	0.82042861	0.184313729	0	18.2941	977.1113	655.7373	3.8319	0.7015	62	0.440771052	0.001018181	4.143520015	0.009571531
13.45394863	×ÔÉí³µÁ¾	Road 1	1.142080482	4.560290909	-0.000822002	0.818349838	0.184313729	0	18.3292	977.1123	655.7373	3.8315	0.7019	63	0.436008834	0.00100718	4.158023197	0.009605034
13.48753874	×ÔÉí³µÁ¾	Road 1	1.185427714	4.645714331	-0.000798923	0.816309452	0.184313729	0	18.3778	977.1133	655.7373	3.8314	0.702	64	0.437295899	0.001010154	4.172712013	0.009638965
13.52074836	×ÔÉí³µÁ¾	Road 1	1.229069796	4.730903006	-0.000724135	0.814227819	0.184313729	0	18.4207	977.1143	655.7373	3.8312	0.7022	65	0.440727405	0.00101808	4.187348403	0.009672775
13.54837277	×ÔÉí³µÁ¾	Road 1	1.265945094	4.805572271	-0.000572921	0.812597811	0.184313729	0	18.4592	977.1143	655.7373	3.8319	0.7015	66	0.448759919	0.001036635	4.199745128	0.009701411
13.57869209	×ÔÉí³µÁ¾	Road 1	1.307088403	4.885198259	-0.000400582	0.81053561	0.184313729	0	18.5009	977.1152	655.7373	3.8317	0.7017	67	0.447966597	0.001034803	4.213327173	0.009732786
13.6100594	×ÔÉí³µÁ¾	Road 1	1.350345877	4.964624262	-0.000268335	0.808884144	0.184313729	0	18.5433	977.1162	655.7373	3.8315	0.7019	68	0.446383492	0.001031146	4.227329022	0.00976513
13.64193622	×ÔÉí³µÁ¾	Road 1	1.3950755	5.051527405	-0.000172624	0.807213306	0.184313729	0	18.5906	977.1172	655.7373	3.8314	0.702	69	0.457279434	0.001056315	4.241905638	0.009798802
13.67129884	×ÔÉí³µÁ¾	Road 1	1.4369013	5.128047609	-8.34E-05	0.805992067	0.184313729	0	18.633	977.1182	655.7373	3.8312	0.7022	70	0.454513703	0.001049927	4.255251348	0.009829631
13.70391024	×ÔÉí³µÁ¾	Road 1	1.483954439	5.194235516	-2.23E-05	0.804741919	0.184313729	0	18.6703	977.1182	655.7373	3.8319	0.7016	71	0.430924494	0.000995436	4.269304399	0.009862093
13.7376565	×ÔÉí³µÁ¾	Road 1	1.533502521	5.285714722	-1.71E-06	0.803481519	0.184313729	0	18.7227	977.1191	655.7373	3.8318	0.7016	72	0.46386606	0.001071531	4.284958144	0.009898253
13.76937533	×ÔÉí³µÁ¾	Road 1	1.580878181	5.377005959	8.76E-08	0.801831365	0.184313729	0	18.776	977.1201	655.7373	3.8318	0.7016	73	0.474427073	0.001095927	4.300006418	0.009933015
13.8206899	×ÔÉí³µÁ¾	Road 1	1.659252324	5.498379135	1.17E-05	0.799341142	0.184313729	0	18.8485	977.1221	655.7373	3.8312	0.7022	74	0.453915246	0.001048544	4.32329888	0.00998682
13.8547382	×ÔÉí³µÁ¾	Road 1	1.712042309	5.581598425	7.63E-05	0.797681928	0.184313729	0	18.8993	977.123	655.7373	3.8311	0.7022	75	0.460429838	0.001063593	4.338975734	0.010023034
13.90792549	×ÔÉí³µÁ¾	Road 1	1.796399174	5.709722614	0.000398099	0.793149173	0.184313729	0	18.9793	977.124	655.7373	3.8316	0.7018	76	0.461939563	0.00106708	4.363545051	0.010079789
13.93911136	×ÔÉí³µÁ¾	Road 1	1.846551881	5.789473915	0.001031219	0.788214743	0.184313729	0	19.0304	977.125	655.7373	3.8316	0.7018	77	0.47209558	0.001090541	4.37826776	0.010113799
13.97136573	×ÔÉí³µÁ¾	Road 1	1.899044364	5.85883112	0.002032223	0.7845186	0.184313729	0	19.0757	977.126	655.7373	3.8314	0.7019	78	0.453798947	0.001048276	4.392904761	0.01014761
13.99758623	×ÔÉí³µÁ¾	Road 1	1.942344413	5.944974661	0.002980254	0.779980242	0.184313729	0	19.1331	977.127	655.7373	3.8315	0.7019	79	0.513805086	0.00118689	4.406376985	0.010178731
14.02699796	×ÔÉí³µÁ¾	Road 1	1.991473841	6.013448668	0.003840635	0.775843918	0.184313729	0	19.1796	977.1279	655.7373	3.8313	0.702	80	0.467070286	0.001078932	4.420114331	0.010210464
14.0565061	×ÔÉí³µÁ¾	Road 1	2.041322403	6.081536865	0.004506753	0.772129714	0.184313729	0	19.2266	977.1289	655.7373	3.8312	0.7021	81	0.467892824	0.001080832	4.433920976	0.010242357
14.08740751	×ÔÉí³µÁ¾	Road 1	2.094167849	6.156468773	0.004934264	0.767565489	0.184313729	0	19.2793	977.1289	655.7373	3.8322	0.7021	82	0.476111412	0.001099817	4.448633493	0.010276343
14.12058818	×ÔÉí³µÁ¾	Road 1	2.151663641	6.238116932	0.005054639	0.763013721	0.184313729	0	19.3379	977.1299	655.7373	3.8319	0.702	83	0.480306843	0.001109509	4.464570393	0.010313158
14.15019785	×ÔÉí³µÁ¾	Road 1	2.203540769	6.307319212	0.005041169	0.759322226	0.184313729	0	19.3884	977.1309	655.7373	3.8319	0.7021	84	0.475750793	0.001098984	4.478657218	0.010345698
14.18250537	×ÔÉí³µÁ¾	Road 1	2.260762358	6.376152849	0.005033098	0.756011307	0.184313729	0	19.4395	977.1318	655.7373	3.8318	0.7021	85	0.466358783	0.001077289	4.493724117	0.010380503
14.21180641	×ÔÉí³µÁ¾	Road 1	2.313273488	6.451652098	0.004987525	0.751888931	0.184313729	0	19.4965	977.1328	655.7373	3.8319	0.7021	86	0.493001506	0.001138833	4.50816957	0.010413872
14.23833994	×ÔÉí³µÁ¾	Road 1	2.361274412	6.512639093	0.004813205	0.748588264	0.184313729	0	19.5433	977.1338	655.7373	3.8317	0.7022	87	0.47941178	0.001107441	4.520890058	0.010443256
14.27057306	×ÔÉí³µÁ¾	Road 1	2.420275232	6.589588022	0.004572013	0.744047046	0.184313729	0	19.6034	977.1348	655.7373	3.8319	0.7021	88	0.48640621	0.001123598	4.536568445	0.010479473
14.2974134	×ÔÉí³µÁ¾	Road 1	2.469785279	6.6406075	0.004336582	0.740717053	0.184313729	0	19.6438	977.1348	655.7373	3.8326	0.7014	89	0.460316067	0.00106333	4.548923486	0.010508013
14.32962525	×ÔÉí³µÁ¾	Road 1	2.530008745	6.730580378	0.004151799	0.737846494	0.192156866	0	19.7162	977.1357	655.7373	3.832	0.7011	90	0.513728655	0.001186713	4.565471638	0.010546239
14.36094491	×ÔÉí³µÁ¾	Road 1	2.589144581	6.797297001	0.004048605	0.736584306	0.192156866	0	19.7707	977.1367	655.7373	3.832	0.7011	91	0.477385179	0.00110276	4.580423179	0.010580778
14.38725191	×ÔÉí³µÁ¾	Road 1	2.639285448	6.861561871	0.003997656	0.734931052	0.192156866	0	19.8238	977.1377	655.7373	3.832	0.7011	92	0.497545944	0.001149331	4.593512121	0.010611013
14.42066937	×ÔÉí³µÁ¾	Road 1	2.703617224	6.930341434	0.003997656	0.736139715	0.20784314	0	19.8813	977.1387	655.7373	3.832	0.701	93	0.476559909	0.001100853	4.609437541	0.010647801
14.45392591	×ÔÉí³µÁ¾	Road 1	2.76840591	7.013335419	0.004004578	0.741466761	0.215686277	0	19.951	977.1396	655.7373	3.8313	0.6998	94	0.504907323	0.001166336	4.626229012	0.010686589
14.48838988	×ÔÉí³µÁ¾	Road 1	2.836281932	7.090118694	0.004004578	0.748006046	0.223529413	0	20.0157	977.1406	655.7373	3.8315	0.6996	95	0.49091723	0.001134019	4.643147971	0.010725672
14.52053979	×ÔÉí³µÁ¾	Road 1	2.900294763	7.16786499	0.004020761	0.758275449	0.239215687	0	20.081	977.1416	655.7373	3.8318	0.6994	96	0.504734575	0.001165937	4.659375141	0.010763157
14.55405109	×ÔÉí³µÁ¾	Road 1	2.967778905	7.249582672	0.004020761	0.775078416	0.262745112	0	20.1491	977.1426	655.7373	3.832	0.6991	97	0.50829909	0.001174171	4.676408902	0.010802505
14.58786113	×ÔÉí³µÁ¾	Road 1	3.036631736	7.331260014	0.004020761	0.796750963	0.278431386	0	20.2159	977.1436	655.7372	3.8323	0.6989	98	0.509223333	0.001176306	4.693625763	0.010842276
14.62073022	×ÔÉí³µÁ¾	Road 1	3.104266867	7.407764339	0.004020761	0.815934956	0.278431386	0	20.2774	977.1445	655.7372	3.8324	0.6987	99	0.505850712	0.001168515	4.710252616	0.010880684
14.6541726	×ÔÉí³µÁ¾	Road 1	3.173984288	7.50492897	0.004034667	0.840168715	0.294117659	0	20.354	977.1465	655.7373	3.8318	0.6993	100	0.545590743	0.001260315	4.728498471	0.010922831
14.68771432	×ÔÉí³µÁ¾	Road 1	3.244745048	7.59468298	0.004147071	0.867003977	0.309803933	0	20.4232	977.1475	655.7373	3.8311	0.699	101	0.53365894	0.001232752	4.74639831	0.01096418
14.71644682	×ÔÉí³µÁ¾	Road 1	3.306011219	7.676261616	0.00426395	0.891488671	0.31764707	0	20.4847	977.1484	655.7372	3.8313	0.6989	102	0.547053479	0.001263694	4.762116526	0.011000489
14.74670347	×ÔÉí³µÁ¾	Road 1	3.371235358	7.760507011	0.004283239	0.918574154	0.333333343	0	20.5469	977.1494	655.7372	3.8314	0.6988	103	0.546082133	0.00126145	4.778639139	0.011038656
14.78035259	×ÔÉí³µÁ¾	Road 1	3.44478833	7.869171238	0.004283239	0.953849912	0.34117648	0	20.625	977.1504	655.7372	3.8319	0.6983	104	0.579299774	0.001338182	4.798132067	0.011083685
14.80636745	×ÔÉí³µÁ¾	Road 1	3.502172602	7.940977192	0.004247121	0.977164328	0.356862754	0	20.6756	977.1514	655.7372	3.8318	0.6984	105	0.550326814	0.001271255	4.812448741	0.011116757
14.83708045	×ÔÉí³µÁ¾	Road 1	3.570830983	8.047735977	0.004168376	1.017218947	0.380392164	0	20.7488	977.1523	655.7372	3.8322	0.698	106	0.602740867	0.001392331	4.830960725	0.011159519
14.8712116	×ÔÉí³µÁ¾	Road 1	3.648290212	8.170052433	0.004132908	1.056733012	0.396078438	0	20.8299	977.1533	655.7372	3.8327	0.6976	107	0.614680703	0.001419912	4.85194048	0.011207983
14.90390144	×ÔÉí³µÁ¾	Road 1	3.723580417	8.29140501	0.004128194	1.112307668	0.403921574	0	20.9077	977.1543	655.7372	3.8331	0.6971	108	0.628539492	0.001451926	4.872487338	0.011255446
14.93789586	×ÔÉí³µÁ¾	Road 1	3.802930669	8.403171158	0.004128194	1.153761744	0.419607848	0	20.9772	977.1553	655.7372	3.8324	0.6968	109	0.602528735	0.001391841	4.892969951	0.011302761
14.97071583	×ÔÉí³µÁ¾	Road 1	3.880675202	8.527744102	0.004128194	1.206103921	0.450980395	0	21.0525	977.1572	655.7372	3.8318	0.6974	110	0.644009707	0.001487662	4.914106331	0.011351586
15.00403982	×ÔÉí³µÁ¾	Road 1	3.960946246	8.671704483	0.004147071	1.276048303	0.490196079	0	21.1361	977.1582	655.7372	3.8324	0.6969	111	0.68850466	0.001590446	4.937050051	0.011404586
15.03769334	×ÔÉí³µÁ¾	Road 1	4.043357639	8.815749836	0.004173121	1.342765093	0.498039216	0	21.2163	977.1592	655.7372	3.8329	0.6964	112	0.691995507	0.00159851	4.960338136	0.011458381
15.07066873	×ÔÉí³µÁ¾	Road 1	4.12550109	8.967791176	0.004187376	1.41214788	0.521568656	0	21.2978	977.1602	655.7372	3.8334	0.6959	113	0.724050992	0.001672558	4.984214	0.011513534
15.10404476	×ÔÉí³µÁ¾	Road 1	4.21017638	9.133230686	0.004192134	1.485993147	0.53725493	0	21.3832	977.1621	655.7372	3.832	0.6963	114	0.758731582	0.00175267	5.009537454	0.011572032
15.13725695	×ÔÉí³µÁ¾	Road 1	4.296147361	9.318733978	0.004192134	1.573859811	0.576470613	0	21.4755	977.1631	655.7372	3.8327	0.6957	115	0.817806827	0.001889134	5.036698607	0.011634774
15.17051056	×ÔÉí³µÁ¾	Road 1	4.383735312	9.482177925	0.004192134	1.647198796	0.58431375	0	21.5539	977.1641	655.7372	3.8331	0.6952	116	0.773043567	0.001785731	5.062405094	0.011694156
15.19977567	×ÔÉí³µÁ¾	Road 1	4.462161566	9.64747839	0.004192134	1.714413643	0.592156887	0	21.6309	977.165	655.7372	3.8336	0.6948	117	0.841925444	0.001944848	5.087044135	0.011751072
15.22615891	×ÔÉí³µÁ¾	Road 1	4.53386118	9.78342905	0.004184998	1.764117718	0.592156887	0	21.693	977.166	655.7372	3.8337	0.6947	118	0.808735871	0.00186818	5.108381212	0.011800361
15.25398236	×ÔÉí³µÁ¾	Road 1	4.610986291	9.979008865	0.004180244	1.825362563	0.592156887	0	21.7808	977.168	655.7372	3.8324	0.695	119	0.977870748	0.002258881	5.135588944	0.01186321
15.28785435	×ÔÉí³µÁ¾	Road 1	4.706841187	10.18769932	0.004168376	1.881818414	0.592156887	0	21.8733	977.1689	655.7372	3.8331	0.6934	120	0.916121015	0.00211624	5.166619784	0.011934892
15.32053283	×ÔÉí³µÁ¾	Road 1	4.801391045	10.41601324	0.004139985	1.937564373	0.600000024	0	21.9735	977.1699	655.7372	3.8339	0.6925	121	1.003025841	0.00231699	5.199397144	0.012010607
15.35402836	×ÔÉí³µÁ¾	Road 1	4.900304598	10.63093328	0.004109374	1.99077189	0.623529434	0	22.067	977.1719	655.7372	3.8337	0.6928	122	0.966213617	0.002231953	5.231760986	0.012085368
15.38730543	×ÔÉí³µÁ¾	Road 1	5.000750388	10.86648788	0.004048605	2.054138184	0.647058845	0	22.1686	977.1729	655.7372	3.8345	0.6919	123	1.042047683	0.00240713	5.266437277	0.01216547
15.42064188	×ÔÉí³µÁ¾	Road 1	5.103494978	11.09537859	0.003986136	2.114442587	0.662745118	0	22.2662	977.1748	655.7372	3.8334	0.6921	124	1.037867406	0.002397474	5.30103609	0.012245393
15.45407216	×ÔÉí³µÁ¾	Road 1	5.208856666	11.34606085	0.00394028	2.175958157	0.670588255	0	22.3722	977.1758	655.7372	3.8343	0.6912	125	1.11538578	0.002576541	5.338323758	0.012331528
15.48807025	×ÔÉí³µÁ¾	Road 1	5.318518685	11.61192741	0.00389251	2.240885496	0.694117665	0	22.4838	977.1777	655.7372	3.8344	0.6911	126	1.166072793	0.002693628	5.377967997	0.012423106
15.51612645	×ÔÉí³µÁ¾	Road 1	5.410720609	11.83078365	0.003836147	2.299581766	0.725490212	0	22.575	977.1787	655.7372	3.8351	0.6905	127	1.182187729	0.002730854	5.411135702	0.012499723
15.54524824	×ÔÉí³µÁ¾	Road 1	5.508246277	12.0560051	0.00378033	2.366586447	0.75686276	0	22.6679	977.1797	655.7371	3.8348	0.6898	128	1.192007149	0.002753537	5.445849079	0.012579911
15.57479926	×ÔÉí³µÁ¾	Road 1	5.60911631	12.28830929	0.003744893	2.438852072	0.78039217	0	22.7626	977.1816	655.7371	3.8346	0.69	129	1.222498773	0.002823972	5.481975169	0.012663363
15.60600822	×ÔÉí³µÁ¾	Road 1	5.717949563	12.55407887	0.003711873	2.519012451	0.796078444	0	22.8696	977.1826	655.7371	3.8356	0.689	130	1.31176108	0.003030168	5.522913865	0.012757931
15.63757274	×ÔÉí³µÁ¾	Road 1	5.830588031	12.84665594	0.003689967	2.60156846	0.811764717	0	22.986	977.1846	655.7371	3.8357	0.6889	131	1.417268596	0.00327389	5.567649263	0.01286127
15.6706394	×ÔÉí³µÁ¾	Road 1	5.951359066	13.14846067	0.003674685	2.672815323	0.811764717	0	23.1052	977.1865	655.7371	3.8359	0.6887	132	1.427470209	0.003297456	5.61485094	0.012970306
15.70388568	×ÔÉí³µÁ¾	Road 1	6.075732924	13.46754999	0.003672505	2.736333847	0.811764717	0	23.2309	977.1875	655.7371	3.8363	0.6874	133	1.508559946	0.003484773	5.665004941	0.013086161
15.73721113	×ÔÉí³µÁ¾	Road 1	6.203601783	13.81310263	0.003672505	2.791912079	0.811764717	0	23.3673	977.1895	655.7371	3.8368	0.6869	134	1.629729966	0.003764676	5.719316429	0.013211621
15.77066414	×ÔÉí³µÁ¾	Road 1	6.334682782	14.10610113	0.003670326	2.829728842	0.811764717	0	23.4837	977.1914	655.7371	3.837	0.6867	135	1.466327744	0.003387217	5.768369512	0.013324934
15.80466406	×ÔÉí³µÁ¾	Road 1	6.471086362	14.44276772	0.003670326	2.868065357	0.819607854	0	23.6185	977.1934	655.7371	3.8375	0.6863	136	1.633834415	0.003774157	5.823919744	0.013453255
15.83778314	×ÔÉí³µÁ¾	Road 1	6.607191672	14.79446583	0.003663795	2.912517071	0.843137264	0	23.7607	977.1953	655.7371	3.8371	0.6856	137	1.756631028	0.004057818	5.88209775	0.013587646
15.870657	×ÔÉí³µÁ¾	Road 1	6.744991314	15.09037228	0.003648585	2.953618765	0.858823538	0	23.8811	977.1973	655.7371	3.8374	0.6844	138	1.579721715	0.003649157	5.934029293	0.013707608
15.90384133	×ÔÉí³µÁ¾	Road 1	6.887532042	15.46352291	0.003629091	3.002673626	0.874509811	0	24.0339	977.1992	655.7371	3.8382	0.6836	139	1.904842131	0.004400185	5.9972402	0.013853625
15.93735079	×ÔÉí³µÁ¾	Road 1	7.034706667	15.81131401	0.003607513	3.049728394	0.890196085	0	24.1772	977.2012	655.7371	3.8388	0.683	140	1.825561491	0.004217047	6.058413786	0.013994936
15.9706953	×ÔÉí³µÁ¾	Road 1	7.184229657	16.1430685	0.003596756	3.094183207	0.905882359	0	24.3149	977.2021	655.7371	3.8394	0.6815	141	1.799301446	0.004156386	6.118410617	0.014133529
16.00380009	×ÔÉí³µÁ¾	Road 1	7.336276194	16.53439293	0.003588166	3.141477585	0.913725495	0	24.4783	977.2051	655.7371	3.8394	0.6815	142	2.097682215	0.004845646	6.187853937	0.014293943
16.03737993	×ÔÉí³µÁ¾	Road 1	7.493382246	16.84289589	0.003583876	3.178164959	0.929411769	0	24.6081	977.2061	655.737	3.8408	0.6801	143	1.755996905	0.004056353	6.246820036	0.014430154
16.07297143	×ÔÉí³µÁ¾	Road 1	7.664099407	17.2676548	0.003583876	3.229439735	0.945098042	0	24.7882	977.209	655.737	3.8402	0.6798	144	2.193312461	0.005066552	6.324883322	0.01461048
16.10388751	×ÔÉí³µÁ¾	Road 1	7.8152135	17.59636917	0.003583876	3.265657187	0.952941179	0	24.9286	977.2109	655.737	3.8408	0.6792	145	2.03861098	0.004709191	6.38790918	0.01475607
16.13718547	×ÔÉí³µÁ¾	Road 1	7.981999597	18.03203373	0.003583876	3.282235622	0.952941179	0	25.1167	977.2129	655.7369	3.8422	0.6778	146	2.454501949	0.0056699	6.469639089	0.014944866
16.17066231	×ÔÉí³µÁ¾	Road 1	8.153235398	18.41418972	0.003583876	3.346792221	0.952941179	0	25.2838	977.2148	655.7369	3.8433	0.6767	147	2.240981725	0.005176668	6.544660076	0.015118165
16.19509438	×ÔÉí³µÁ¾	Road 1	8.280031362	18.68304749	0.003583876	3.33975625	0.945098042	0	25.4023	977.2168	655.7369	3.8425	0.6765	148	2.209265412	0.005103403	6.598636996	0.015242851
16.22212936	×ÔÉí³µÁ¾	Road 1	8.422779619	19.00847282	0.003577447	3.3234725	0.945098042	0	25.5489	977.2188	655.7369	3.8433	0.6758	149	2.408276464	0.005563119	6.663744708	0.01539325
16.25463556	×ÔÉí³µÁ¾	Road 1	8.597875436	19.39153004	0.003566751	3.32344389	0.945098042	0	25.725	977.2207	655.7369	3.8445	0.6746	150	2.406115499	0.005558127	6.741958378	0.015573924
16.33732146	×ÔÉí³µÁ¾	Road 1	9.065230471	20.34782295	0.00354968	3.273803234	0.937254906	0	26.1832	977.2266	655.7369	3.846	0.6711	151	2.44418784	0.005646074	6.944058258	0.016040775
16.37071143	×ÔÉí³µÁ¾	Road 1	9.257443084	20.72375278	0.003498794	3.255367994	0.929411769	0	26.3715	977.2285	655.7368	3.8475	0.6697	152	2.459275459	0.005680926	7.026173383	0.016230461
16.40387963	×ÔÉí³µÁ¾	Road 1	9.451916081	21.10765114	0.003227595	3.213048458	0.905882359	0	26.5691	977.2314	655.7368	3.8471	0.669	153	2.556257976	0.005904956	7.110959858	0.016426317
16.43719225	×ÔÉí³µÁ¾	Road 1	9.650631045	21.47455845	0.003049034	3.170469999	0.905882359	0	26.7643	977.2334	655.7368	3.8487	0.6674	154	2.493581024	0.005760172	7.194027582	0.016618204
16.47058002	×ÔÉí³µÁ¾	Road 1	9.853154854	21.83691158	0.002860548	3.130887508	0.905882359	0	26.9628	977.2354	655.7368	3.8504	0.6658	155	2.500939338	0.00577717	7.277528362	0.016811091
16.50388311	×ÔÉí³µÁ¾	Road 1	10.05857443	22.20545998	0.002657095	3.095774412	0.905882359	0	27.1709	977.2383	655.7368	3.8503	0.6649	156	2.578734903	0.005956878	7.363408209	0.017009473
16.5378691	×ÔÉí³µÁ¾	Road 1	10.27153987	22.55857944	0.002455185	3.043743849	0.905882359	0	27.3761	977.2402	655.7368	3.852	0.6631	157	2.485168776	0.00574074	7.447869121	0.017204578
16.57057287	×ÔÉí³µÁ¾	Road 1	10.47961144	22.90431919	0.002303463	2.984533072	0.898039222	0	27.5845	977.2432	655.7368	3.8529	0.6623	158	2.554929974	0.005901888	7.531424972	0.017397592
16.60391409	×ÔÉí³µÁ¾	Road 1	10.6949776	23.25404663	0.002147439	2.932267666	0.898039222	0	27.8025	977.2461	655.7367	3.853	0.6613	159	2.572961467	0.005943541	7.617210631	0.017595757
16.6370284	×ÔÉí³µÁ¾	Road 1	10.91194787	23.58777351	0.002002986	2.893370867	0.898039222	0	28.0172	977.248	655.7367	3.8549	0.6593	160	2.523282081	0.005828782	7.700767392	0.017788773
16.67060824	×ÔÉí³µÁ¾	Road 1	11.13504424	23.91753159	0.001869326	2.859434366	0.898039222	0	28.235	977.251	655.7367	3.8559	0.6583	161	2.501799618	0.005779157	7.784777428	0.017982836
16.70384279	×ÔÉí³µÁ¾	Road 1	11.35849031	24.20390568	0.001741747	2.83254528	0.898039222	0	28.4288	977.2529	655.7366	3.8575	0.6567	162	2.2799538	0.005266693	7.860550659	0.018157872
16.73724669	×ÔÉí³µÁ¾	Road 1	11.5865265	24.57588558	0.001607514	2.806540489	0.898039222	0	28.6863	977.2559	655.7366	3.8583	0.655	163	2.838319995	0.006556519	7.955361603	0.018376885
16.77066708	×ÔÉí³µÁ¾	Road 1	11.81782305	24.91495628	0.001477983	2.782182932	0.898039222	0	28.9269	977.2588	655.7366	3.8597	0.6526	164	2.663417667	0.006152495	8.044374061	0.018582504
16.80406951	×ÔÉí³µÁ¾	Road 1	12.05185243	25.22288933	0.001344422	2.765876055	0.898039222	0	29.1498	977.2617	655.7366	3.8608	0.6514	165	2.493402773	0.00575976	8.127659771	0.018774894
16.8320579	×ÔÉí³µÁ¾	Road 1	12.25002939	25.49045963	0.001227537	2.748486042	0.898039222	0	29.347	977.2637	655.7366	3.8625	0.6498	166	2.593168495	0.005990219	8.200238395	0.018942551
16.86251139	×ÔÉí³µÁ¾	Road 1	12.46807359	25.77567501	0.001123557	2.737039328	0.898039222	0	29.5607	977.2666	655.7366	3.8634	0.6489	167	2.575149915	0.005948596	8.278660684	0.019123706
16.89333766	×ÔÉí³µÁ¾	Road 1	12.69161966	26.10649223	0.001044357	2.718014479	0.898039222	0	29.8129	977.2695	655.7365	3.8641	0.6472	168	2.908898754	0.006719556	8.36833119	0.019330845
16.9546548	×ÔÉí³µÁ¾	Road 1	13.14602453	26.67863102	0.000968073	2.69410944	0.898039222	0	30.2602	977.2744	655.7365	3.8673	0.644	169	2.635708221	0.006088486	8.529945296	0.019704174
16.98825481	×ÔÉí³µÁ¾	Road 1	13.39754515	26.94863548	0.000893048	2.684344292	0.898039222	0	30.4762	977.2773	655.7365	3.8683	0.643	170	2.371688981	0.005478602	8.609634053	0.019888255
17.02087501	×ÔÉí³µÁ¾	Road 1	13.64466755	27.27269268	0.000753311	2.656062365	0.898039222	0	30.7398	977.2803	655.7365	3.8702	0.6411	171	2.839613236	0.006559507	8.7022628	0.020102227
17.05392298	×ÔÉí³µÁ¾	Road 1	13.89762557	27.55536575	0.000668062	2.617516994	0.898039222	0	30.9759	977.2832	655.7364	3.8716	0.6398	172	2.540721266	0.005869066	8.786228478	0.020296188
17.087468	×ÔÉí³µÁ¾	Road 1	14.1573199	27.86999702	0.00058757	2.582747936	0.898039222	0	31.2453	977.2861	655.7364	3.8735	0.6378	173	2.763054484	0.006382656	8.878915195	0.020510294
17.12134621	×ÔÉí³µÁ¾	Road 1	14.42268709	28.19870453	0.000505059	2.561515331	0.898039222	0	31.5335	977.2891	655.7363	3.8758	0.6355	174	2.869998165	0.006629696	8.976145621	0.020734896
17.15479043	×ÔÉí³µÁ¾	Road 1	14.68703453	28.45486794	0.000422874	2.550167322	0.898039222	0	31.7617	977.292	655.7363	3.877	0.6343	175	2.396337731	0.00553554	9.056289259	0.020920028
17.18814301	×ÔÉí³µÁ¾	Road 1	14.95350808	28.76253834	0.000351036	2.540624142	0.898039222	0	32.0399	977.2949	655.7363	3.8792	0.6322	176	2.804405203	0.006478176	9.149823401	0.021136092
17.22059606	×ÔÉí³µÁ¾	Road 1	15.21524448	29.03428345	0.000292649	2.532553196	0.890196085	0	32.2887	977.2979	655.7363	3.8798	0.6306	177	2.617010878	0.006045295	9.234753383	0.02133228
17.2492087	×ÔÉí³µÁ¾	Road 1	15.44704873	29.16526794	0.000251192	2.524292707	0.882352948	0	32.41	977.2998	655.7363	3.88	0.6303	178	1.678077682	0.003876359	9.282767615	0.021443193
17.26573305	×ÔÉí³µÁ¾	Road 1	15.58223566	29.45186348	0.000223822	2.506977081	0.882352948	0	32.6787	977.3027	655.7362	3.882	0.6284	179	4.92198292	0.011369781	9.36410019	0.021631071
17.28253232	×ÔÉí³µÁ¾	Road 1	15.72023614	29.57281952	0.000210267	2.499014616	0.882352948	0	32.7935	977.3037	655.7362	3.8831	0.6273	180	2.366354137	0.005466278	9.403853208	0.021722901
17.29909112	×ÔÉí³µÁ¾	Road 1	15.85709263	29.75355492	0.000204811	2.488423586	0.882352948	0	32.9665	977.3066	655.7362	3.8833	0.627	181	3.329399041	0.007690912	9.458984086	0.021850253
17.3157401	×ÔÉí³µÁ¾	Road 1	15.99524966	29.87361832	0.000201018	2.482241631	0.882352948	0	33.0825	977.3076	655.7362	3.8844	0.6259	182	2.390369768	0.005521754	9.498781305	0.021942185
17.33236489	×ÔÉí³µÁ¾	Road 1	16.13379868	30.00197639	0.000199139	2.47858119	0.882352948	0	33.2072	977.3086	655.7361	3.8857	0.6246	183	2.530909312	0.005846401	9.540857135	0.02203938
17.34909708	×ÔÉí³µÁ¾	Road 1	16.27379886	30.12162094	0.000198203	2.475610971	0.882352948	0	33.3241	977.3105	655.7361	3.8859	0.6244	184	2.391947446	0.005525399	9.580879651	0.022131832
17.36568265	×ÔÉí³µÁ¾	Road 1	16.4134368	30.30928116	0.000198203	2.469528437	0.882352948	0	33.5088	977.3125	655.7361	3.8873	0.623	185	3.490239013	0.008062452	9.638767241	0.022265552
17.38239467	×ÔÉí³µÁ¾	Road 1	16.55469272	30.42846222	0.000198203	2.466206551	0.882352948	0	33.6269	977.3145	655.7361	3.8875	0.6229	186	2.408294836	0.005563161	9.679014731	0.022358524
17.39905025	×ÔÉí³µÁ¾	Road 1	16.69602229	30.54750938	0.000198203	2.464256287	0.882352948	0	33.7455	977.3154	655.7361	3.8887	0.6217	187	2.420811898	0.005592075	9.719334754	0.022451663
17.41575495	×ÔÉí³µÁ¾	Road 1	16.83863592	30.73441429	0.000198203	2.462826014	0.882352948	0	33.9327	977.3174	655.7361	3.8901	0.6202	188	3.50181259	0.008089187	9.777831471	0.022586791
17.43239843	×ÔÉí³µÁ¾	Road 1	16.98127623	30.853228	0.000198203	2.459557772	0.882352948	0	34.0525	977.3193	655.7361	3.8903	0.62	189	2.439730491	0.005635777	9.818437082	0.02268059
17.44903971	×ÔÉí³µÁ¾	Road 1	17.12444636	30.97191811	0.000198203	2.457327604	0.882352948	0	34.1727	977.3203	655.7361	3.8916	0.6188	190	2.446247719	0.005650832	9.859145782	0.022774627
17.46566817	×ÔÉí³µÁ¾	Road 1	17.2683666	31.1582119	0.000198203	2.454657316	0.882352948	0	34.3626	977.3223	655.7361	3.893	0.6173	191	3.55002298	0.008200553	9.918177173	0.022910989
17.48240805	×ÔÉí³µÁ¾	Road 1	17.41380222	31.27668915	0.000198203	2.453995466	0.882352948	0	34.484	977.3242	655.7361	3.8933	0.617	192	2.452645526	0.005665611	9.95923418	0.023005831
17.49902771	×ÔÉí³µÁ¾	Road 1	17.55873993	31.39510117	0.000198203	2.452038288	0.874509811	0	34.6059	977.3252	655.736	3.8945	0.6158	193	2.473613478	0.005714047	10.00034478	0.023100796
17.51570272	×ÔÉí³µÁ¾	Road 1	17.70502053	31.58080788	0.000198203	2.444277763	0.874509811	0	34.7983	977.3281	655.736	3.8951	0.6152	194	3.576161903	0.008260934	10.0599773	0.023238548
17.53233007	×ÔÉí³µÁ¾	Road 1	17.85142746	31.69866714	0.000198203	2.440087318	0.874509811	0	34.9214	977.3291	655.736	3.8964	0.614	195	2.484691248	0.005739637	10.10129114	0.023333983
17.54902524	×ÔÉí³µÁ¾	Road 1	17.99924962	31.87508011	0.000198203	2.434355259	0.874509811	0	35.1068	977.3311	655.736	3.8978	0.6126	196	3.450606782	0.007970902	10.1588996	0.023467058
17.56571747	×ÔÉí³µÁ¾	Road 1	18.14758989	31.99242096	0.000198203	2.42971468	0.874509811	0	35.231	977.333	655.736	3.8981	0.6123	197	2.488812025	0.005749156	10.20044343	0.023563024
17.60047909	×ÔÉí³µÁ¾	Road 1	18.45949411	32.30157967	0.000198203	2.421044111	0.874509811	0	35.5614	977.3369	655.736	3.9002	0.6102	198	3.022019517	0.006980865	10.30549372	0.023805691
17.61605773	×ÔÉí³µÁ¾	Road 1	18.59978113	32.41832314	0.000198203	2.418813944	0.874509811	0	35.6873	977.3379	655.7359	3.9015	0.6089	199	2.647818014	0.00611646	10.34674312	0.023900977
17.63239807	×ÔÉí³µÁ¾	Road 1	18.74745676	32.53495674	0.000197582	2.417170763	0.874509811	0	35.8136	977.3398	655.7359	3.9018	0.6085	200	2.556353045	0.005905176	10.3885148	0.023997469
17.64904411	×ÔÉí³µÁ¾	Road 1	18.89843398	32.65147362	0.000197271	2.414660454	0.874509811	0	35.9403	977.3408	655.7359	3.9032	0.6072	201	2.52555186	0.005834025	10.43055525	0.024094583
17.66564214	×ÔÉí³µÁ¾	Road 1	19.0498188	32.83434105	0.000195416	2.411633015	0.874509811	0	36.1404	977.3438	655.7359	3.9039	0.6065	202	3.672904363	0.008484409	10.49151823	0.024235407
17.68276948	×ÔÉí³µÁ¾	Road 1	19.20658439	32.9506073	0.000192654	2.410093069	0.874509811	0	36.2683	977.3447	655.7358	3.9052	0.6051	203	2.485909693	0.005742451	10.53409524	0.02433376
17.69903834	×ÔÉí³µÁ¾	Road 1	19.35601761	33.06682549	0.000187809	2.409532785	0.874509811	0	36.3967	977.3467	655.7358	3.9056	0.6048	204	2.594972461	0.005994386	10.57631249	0.024431282
17.7156349	×ÔÉí³µÁ¾	Road 1	19.50930193	33.2492672	0.000179235	2.406172514	0.874509811	0	36.5994	977.3486	655.7358	3.9073	0.603	205	3.708586447	0.008566835	10.63786227	0.024573462
17.74978914	×ÔÉí³µÁ¾	Road 1	19.82749722	33.53912086	0.00016924	2.403651714	0.874509811	0	36.9241	977.3525	655.7358	3.9093	0.601	206	3.010025793	0.00695316	10.7406674	0.024810942
17.7657182	×ÔÉí³µÁ¾	Road 1	19.97644835	33.66324921	0.000156945	2.401744604	0.874509811	0	37.0641	977.3545	655.7358	3.9099	0.6005	207	2.824636422	0.00652491	10.78566122	0.024914877
17.78277993	×ÔÉí³µÁ¾	Road 1	20.13673527	33.82031937	0.000124571	2.400174379	0.874509811	0	37.2422	977.3564	655.7358	3.9112	0.5992	208	3.247475645	0.007501669	10.84106875	0.025042869
17.79906638	×ÔÉí³µÁ¾	Road 1	20.29026215	33.9359745	0.000108217	2.398679972	0.874509811	0	37.3739	977.3584	655.7358	3.9116	0.5987	209	2.64302548	0.006105389	10.88411427	0.025142304
17.8158125	×ÔÉí³µÁ¾	Road 1	20.44885201	34.09288673	9.00E-05	2.397969723	0.874509811	0	37.5534	977.3604	655.7357	3.9129	0.5974	210	3.319515372	0.007668081	10.93970326	0.025270715
17.83232439	×ÔÉí³µÁ¾	Road 1	20.60579144	34.21667862	7.43E-05	2.395729542	0.874509811	0	37.6958	977.3613	655.7357	3.9145	0.5958	211	2.779020516	0.006419537	10.98559014	0.025376713
17.8490716	×ÔÉí³µÁ¾	Road 1	20.76558133	34.34860725	6.01E-05	2.394134998	0.874509811	0	37.8481	977.3633	655.7357	3.9154	0.595	212	2.901063803	0.006701457	11.03417488	0.025488944
17.8656766	×ÔÉí³µÁ¾	Road 1	20.92454643	34.46399117	4.62E-05	2.393719196	0.874509811	0	37.9819	977.3652	655.7357	3.9158	0.5945	213	2.634182707	0.006084962	11.07791547	0.025589985
17.88244288	×ÔÉí³µÁ¾	Road 1	21.08586132	34.6370018	3.56E-05	2.392429113	0.874509811	0	38.1835	977.3672	655.7357	3.9175	0.5928	214	3.650482231	0.008432614	11.13912047	0.025731368
17.90011748	×ÔÉí³µÁ¾	Road 1	21.25648136	34.75224152	2.65E-05	2.390398741	0.874509811	0	38.3184	977.3691	655.7357	3.918	0.5923	215	2.525209189	0.005833233	11.18375255	0.025834468
17.91568182	×ÔÉí³µÁ¾	Road 1	21.40722807	34.8674057	1.84E-05	2.389178753	0.874509811	0	38.4538	977.3711	655.7357	3.9185	0.5918	216	2.797069933	0.006461232	11.22728709	0.025935033
17.93236526	×ÔÉí³µÁ¾	Road 1	21.56961402	35.04010735	1.28E-05	2.388118505	0.874509811	0	38.6577	977.373	655.7356	3.9203	0.5901	217	3.699461844	0.008545757	11.28900683	0.026077606
17.94910551	×ÔÉí³µÁ¾	Road 1	21.73308805	35.1551754	8.42E-06	2.387272596	0.882352948	0	38.7942	977.375	655.7356	3.9208	0.5895	218	2.658321848	0.006140723	11.33350781	0.026180403
17.96565186	×ÔÉí³µÁ¾	Road 1	21.89519731	35.27022629	4.72E-06	2.387862682	0.882352948	0	38.9312	977.376	655.7356	3.9223	0.588	219	2.690248975	0.006214475	11.3780216	0.02628323
17.98234409	×ÔÉí³µÁ¾	Road 1	22.05934598	35.40180473	2.55E-06	2.390495777	0.882352948	0	39.0882	977.3779	655.7356	3.9232	0.5871	220	2.982484799	0.00688954	11.42780593	0.026398232
17.99904915	×ÔÉí³µÁ¾	Road 1	22.22446174	35.58302765	1.22E-06	2.393866062	0.890196085	0	39.3051	977.3809	655.7356	3.9242	0.5861	221	3.904222457	0.009018754	11.49302622	0.026548891
18.01585612	×ÔÉí³µÁ¾	Road 1	22.39112401	35.69854202	3.86E-07	2.398730755	0.890196085	0	39.4437	977.3818	655.7355	3.9258	0.5846	222	2.694587707	0.006224498	11.53831406	0.026653505
18.03340353	×ÔÉí³µÁ¾	Road 1	22.56577343	35.83081055	8.76E-08	2.403668165	0.890196085	0	39.6027	977.3838	655.7355	3.9267	0.5836	223	2.908442112	0.006718501	11.58934968	0.026771398
18.04903971	×ÔÉí³µÁ¾	Road 1	22.72215649	36.00488205	5.13E-09	2.408791304	0.890196085	0	39.8122	977.3867	655.7355	3.9276	0.5828	224	4.035611734	0.009322263	11.65245126	0.026917162
18.06573671	×ÔÉí³µÁ¾	Road 1	22.88972683	36.12943954	-1.50E-09	2.413041592	0.890196085	0	39.9625	977.3887	655.7355	3.9283	0.582	225	2.906185886	0.006713289	11.70097584	0.027029254
18.08232485	×ÔÉí³µÁ¾	Road 1	23.05674081	36.24581223	-4.85E-08	2.414943457	0.890196085	0	40.1032	977.3896	655.7355	3.9299	0.5804	226	2.775861584	0.00641224	11.7470222	0.027135621
18.09899179	×ÔÉí³µÁ¾	Road 1	23.22508748	36.36228104	-2.33E-07	2.417066574	0.890196085	0	40.2444	977.3916	655.7355	3.9305	0.5798	227	2.775227802	0.006410776	11.79327676	0.027242469
18.11568182	×ÔÉí³µÁ¾	Road 1	23.39455508	36.55375214	-6.55E-07	2.418046474	0.890196085	0	40.4774	977.3945	655.7355	3.9318	0.5785	228	4.198838793	0.009699318	11.86335553	0.027404351
18.13237919	×ÔÉí³µÁ¾	Road 1	23.56463779	36.67032051	-1.28E-06	2.418206453	0.890196085	0	40.6198	977.3965	655.7354	3.9324	0.5779	229	2.794081212	0.006454328	11.91000932	0.027512122
18.14905749	×ÔÉí³µÁ¾	Road 1	23.73510517	36.79525909	-2.11E-06	2.41909647	0.890196085	0	40.7728	977.3975	655.7354	3.9342	0.5761	230	2.964184006	0.006847265	11.95944689	0.027626322
18.16563866	×ÔÉí³µÁ¾	Road 1	23.90538516	36.97013397	-3.23E-06	2.418876648	0.890196085	0	40.988	977.4004	655.7354	3.9351	0.5751	231	3.94916074	0.009122561	12.02492858	0.027777585
18.18231257	×ÔÉí³µÁ¾	Road 1	24.07715744	37.08670235	-4.61E-06	2.418086529	0.890196085	0	41.132	977.4023	655.7354	3.9358	0.5744	232	2.825583918	0.006527099	12.0720421	0.027886417
18.19898354	×ÔÉí³µÁ¾	Road 1	24.24959348	37.23656273	-6.15E-06	2.418293715	0.890196085	0	41.2764	977.4043	655.7354	3.9364	0.5737	233	3.476530568	0.008030786	12.12999925	0.028020298
18.21565268	×ÔÉí³µÁ¾	Road 1	24.42266557	37.378022	-8.26E-06	2.416706324	0.890196085	0	41.494	977.4063	655.7354	3.9384	0.5717	234	3.326773806	0.007684847	12.18545371	0.028148398
18.23237974	×ÔÉí³µÁ¾	Road 1	24.59688013	37.49448738	-1.01E-05	2.416573524	0.890196085	0	41.6396	977.4082	655.7354	3.9391	0.571	235	2.844216752	0.006570141	12.23302909	0.028258297
18.2490848	×ÔÉí³µÁ¾	Road 1	24.77167599	37.66912193	-1.20E-05	2.415676117	0.890196085	0	41.7856	977.4102	655.7354	3.9398	0.5703	236	3.988239406	0.009212833	12.29965288	0.028412198
18.26763804	×ÔÉí³µÁ¾	Road 1	24.96645303	37.79379616	-1.43E-05	2.413946152	0.890196085	0	42.016	977.4121	655.7353	3.942	0.5681	237	2.785108995	0.006433602	12.35132567	0.028531562
18.2831309	×ÔÉí³µÁ¾	Road 1	25.12960192	37.91010361	-1.62E-05	2.413053274	0.890196085	0	42.1632	977.4141	655.7353	3.9427	0.5674	238	3.050566765	0.007046809	12.39858769	0.028640738
18.29902954	×ÔÉí³µÁ¾	Road 1	25.29779431	38.08455276	-1.82E-05	2.413716078	0.898039222	0	42.3849	977.417	655.7352	3.9438	0.5663	239	4.199302151	0.009700388	12.46535088	0.028794961
18.31575513	×ÔÉí³µÁ¾	Road 1	25.47531419	38.20920982	-1.99E-05	2.415183306	0.898039222	0	42.5438	977.4189	655.7352	3.9447	0.5654	240	3.05419585	0.007055192	12.51643411	0.028912963
18.33240118	×ÔÉí³µÁ¾	Road 1	25.65252834	38.32566833	-2.18E-05	2.417936325	0.898039222	0	42.6927	977.4209	655.7352	3.9454	0.5646	241	2.911764392	0.006726176	12.56490348	0.029024927
18.34900507	×ÔÉí³µÁ¾	Road 1	25.82983148	38.44226761	-2.39E-05	2.420946598	0.898039222	0	42.8419	977.4219	655.7352	3.9471	0.5629	242	2.928420695	0.006764652	12.61352666	0.029137247
18.36571637	×ÔÉí³µÁ¾	Road 1	26.00913298	38.62569466	-2.59E-05	2.422906637	0.898039222	0	43.0131	977.4238	655.7352	3.9483	0.5617	243	4.255613906	0.009830468	12.68464348	0.029301526
18.38238588	×ÔÉí³µÁ¾	Road 1	26.18860428	38.75919571	-2.83E-05	2.42441678	0.898039222	0	43.2494	977.4268	655.7352	3.9496	0.5604	244	3.279402122	0.007575419	12.7393095	0.029427805
18.39907005	×ÔÉí³µÁ¾	Road 1	26.36877502	38.87605247	-3.08E-05	2.42490387	0.898039222	0	43.4004	977.4287	655.7352	3.9504	0.5596	245	2.951954693	0.006819015	12.78856041	0.029541575
18.41564755	×ÔÉí³µÁ¾	Road 1	26.54860138	39.05141487	-3.38E-05	2.425856829	0.898039222	0	43.6277	977.4316	655.7351	3.9516	0.5584	246	4.165709093	0.009622788	12.85761746	0.029701096
18.43254835	×ÔÉí³µÁ¾	Road 1	26.73248365	39.16832314	-3.64E-05	2.42599678	0.898039222	0	43.7798	977.4336	655.7351	3.9524	0.5576	247	2.94260328	0.006797414	12.90734983	0.029815978
18.44906831	×ÔÉí³µÁ¾	Road 1	26.91302681	39.34365807	-3.88E-05	2.425476789	0.898039222	0	44.0088	977.4355	655.7351	3.9545	0.5554	248	4.206637189	0.009717332	12.97684327	0.029976508
18.46568173	×ÔÉí³µÁ¾	Road 1	27.09513089	39.46053886	-4.23E-05	2.424936771	0.898039222	0	44.162	977.4375	655.7351	3.9554	0.5545	249	3.002526769	0.006935837	13.02672552	0.030091736
18.48246194	×ÔÉí³µÁ¾	Road 1	27.27960779	39.5773922	-4.52E-05	2.42528677	0.905882359	0	44.3157	977.4395	655.735	3.9562	0.5537	250	2.98610078	0.006897893	13.07683292	0.030207484
18.49905483	×ÔÉí³µÁ¾	Road 1	27.46287226	39.7611145	-4.84E-05	2.427856922	0.905882359	0	44.5581	977.4424	655.735	3.9576	0.5522	251	4.405082729	0.010175741	13.149926	0.030376329
18.51665649	×ÔÉí³µÁ¾	Road 1	27.65785074	39.87820129	-5.27E-05	2.431157112	0.905882359	0	44.713	977.4443	655.735	3.9585	0.5513	252	2.899264133	0.0066973	13.20095786	0.030494213
18.53238835	×ÔÉí³µÁ¾	Road 1	27.83262913	39.99541855	-5.68E-05	2.433577299	0.905882359	0	44.8683	977.4463	655.735	3.9593	0.5505	253	3.182643118	0.007351906	13.25102675	0.030609872
18.54904613	×ÔÉí³µÁ¾	Road 1	28.01823724	40.11274567	-6.22E-05	2.435517311	0.905882359	0	45.0241	977.4482	655.735	3.9602	0.5496	254	3.050029814	0.007045569	13.30183347	0.030727235
18.56608842	×ÔÉí³µÁ¾	Road 1	28.20904313	40.30567589	-6.79E-05	2.437607527	0.905882359	0	45.281	977.4512	655.735	3.9619	0.5479	255	4.547274789	0.010504205	13.37932946	0.030906251
18.58232833	×ÔÉí³µÁ¾	Road 1	28.39143338	40.43157578	-7.38E-05	2.438757658	0.905882359	0	45.4492	977.4531	655.735	3.963	0.5468	256	3.319041876	0.007666987	13.43323038	0.031030762
18.59932847	×ÔÉí³µÁ¾	Road 1	28.58291691	40.54911575	-8.18E-05	2.439234734	0.905882359	0	45.6067	977.4551	655.7349	3.9639	0.5459	257	3.034725795	0.007010217	13.48482115	0.031149937
18.6156952	×ÔÉí³µÁ¾	Road 1	28.76806759	40.72544632	-9.39E-05	2.439264536	0.905882359	0	45.8437	977.457	655.7349	3.9662	0.5435	258	4.400336707	0.010164778	13.55684028	0.031316301
18.63233538	×ÔÉí³µÁ¾	Road 1	28.956894	40.8514183	-0.000108009	2.439937592	0.913725495	0	46.0137	977.459	655.7349	3.9673	0.5424	259	3.28622528	0.00759118	13.61152367	0.03144262
18.64899096	×ÔÉí³µÁ¾	Road 1	29.14643932	40.96904411	-0.000123887	2.441577673	0.913725495	0	46.1728	977.4609	655.7349	3.9683	0.5414	260	3.115471717	0.00719674	13.66341366	0.031562486
18.66564068	×ÔÉí³µÁ¾	Road 1	29.33673505	41.14573174	-0.000143748	2.447508097	0.921568632	0	46.4123	977.4639	655.7349	3.9697	0.54	261	4.385358039	0.010130177	13.73642861	0.03173115
18.68231751	×ÔÉí³µÁ¾	Road 1	29.52792706	41.27228394	-0.0001637	2.453428507	0.921568632	0	46.584	977.4658	655.7349	3.9708	0.5388	262	3.32347835	0.007677235	13.79185372	0.031859182
18.69903028	×ÔÉí³µÁ¾	Road 1	29.72008053	41.39067879	-0.000188711	2.458460093	0.921568632	0	46.7447	977.4678	655.7348	3.9718	0.5379	263	3.152265893	0.007281734	13.84453679	0.03198088
18.71568109	×ÔÉí³µÁ¾	Road 1	29.91234549	41.5687706	-0.000223822	2.466346502	0.921568632	0	46.9867	977.4707	655.7348	3.9732	0.5364	264	4.457359312	0.0102965	13.91875545	0.032152325
18.73234693	×ÔÉí³µÁ¾	Road 1	30.10537414	41.6962532	-0.000259669	2.470172405	0.929411769	0	47.1602	977.4727	655.7347	3.9744	0.5352	265	3.376436491	0.007799568	13.9750266	0.032282311
18.74901424	×ÔÉí³µÁ¾	Road 1	30.29897176	41.81547546	-0.000302855	2.47537756	0.929411769	0	47.3226	977.4746	655.7347	3.9754	0.5342	266	3.206435793	0.007406867	14.02846926	0.032405764
18.76566579	×ÔÉí³µÁ¾	Road 1	30.49321552	41.99475174	-0.000356072	2.483048201	0.929411769	0	47.567	977.4775	655.7347	3.9768	0.5327	267	4.525581518	0.010454093	14.10382719	0.032579841
18.7831835	×ÔÉí³µÁ¾	Road 1	30.69814653	42.11459541	-0.000409099	2.487460136	0.937254906	0	47.7306	977.4795	655.7347	3.9778	0.5317	268	3.113922829	0.007193162	14.15837601	0.032705849
18.80031047	×ÔÉí³µÁ¾	Road 1	30.89940482	42.30344696	-0.000465495	2.496422768	0.937254906	0	47.9885	977.4824	655.7347	3.9796	0.5299	269	4.651177375	0.01074422	14.23803658	0.032889865
18.81599468	×ÔÉí³µÁ¾	Road 1	31.08423451	42.42401161	-0.000535858	2.502757788	0.937254906	0	48.1533	977.4844	655.7347	3.9806	0.5289	270	3.444227677	0.007956166	14.29205656	0.033014651
18.83239807	×ÔÉí³µÁ¾	Road 1	31.27808993	42.54484062	-0.000605083	2.507269382	0.937254906	0	48.3185	977.4863	655.7346	3.9816	0.5278	271	3.335363581	0.00770469	14.34676782	0.033141034
18.84906061	×ÔÉí³µÁ¾	Road 1	31.47560843	42.67455482	-0.000656238	2.512001276	0.937254906	0	48.4961	977.4883	655.7346	3.9829	0.5265	272	3.498517351	0.008081575	14.40506201	0.033275693
18.86567513	×ÔÉí³µÁ¾	Road 1	31.67339711	42.85643349	-0.000711656	2.515496016	0.945098042	0	48.7455	977.4912	655.7346	3.9845	0.5249	273	4.679090104	0.010808698	14.48280287	0.033455275
18.88234904	×ÔÉí³µÁ¾	Road 1	31.87249528	42.98653221	-0.00075104	2.518728495	0.945098042	0	48.9244	977.4932	655.7346	3.9857	0.5236	274	3.528505608	0.008150848	14.54163684	0.033591181
18.89898262	×ÔÉí³µÁ¾	Road 1	32.07191454	43.16022949	-0.000790284	2.522514582	0.945098042	0	49.1637	977.4961	655.7346	3.9871	0.5222	275	4.522821351	0.010447717	14.61686757	0.033764964
18.94943908	×ÔÉí³µÁ¾	Road 1	32.68220211	43.54319572	-0.000831681	2.528223991	0.945098042	0	49.6935	977.5029	655.7345	3.9899	0.5194	276	3.482233488	0.008043959	14.79256873	0.034170834
18.96637067	×ÔÉí³µÁ¾	Road 1	32.88785617	43.72621765	-0.000862	2.529524565	0.945098042	0	49.9481	977.5059	655.7345	3.9916	0.5178	277	4.716244429	0.010894525	14.87242227	0.034355295
18.98236205	×ÔÉí³µÁ¾	Road 1	33.08263243	43.84828606	-0.000950264	2.531038761	0.945098042	0	50.1184	977.5078	655.7345	3.9928	0.5166	278	3.529580159	0.00815333	14.92886512	0.034485678
18.99909827	×ÔÉí³µÁ¾	Road 1	33.28704863	43.97039909	-0.000980671	2.53147912	0.945098042	0	50.2891	977.5098	655.7345	3.9939	0.5155	279	3.410683666	0.007878679	14.98594707	0.034617538
19.01566258	×ÔÉí³µÁ¾	Road 1	33.49024828	44.16235428	-0.001005274	2.533145428	0.952941179	0	50.5584	977.5127	655.7344	3.9959	0.5135	280	5.056617508	0.011680786	15.06970643	0.034811022
19.03237534	×ÔÉí³µÁ¾	Road 1	33.69583682	44.28464928	-0.001033089	2.536710262	0.952941179	0	50.7304	977.5146	655.7344	3.997	0.5123	281	3.441012245	0.007948738	15.12721525	0.034943867
19.04902212	×ÔÉí³µÁ¾	Road 1	33.90117995	44.40709877	-0.001058557	2.539875507	0.952941179	0	50.9029	977.5176	655.7344	3.9972	0.5121	282	3.464374856	0.008002706	15.18488594	0.035077087
19.06563041	×ÔÉí³µÁ¾	Road 1	34.10693833	44.60001869	-0.00108928	2.548012972	0.952941179	0	51.1749	977.5205	655.7344	3.9993	0.5101	283	5.11434059	0.011814127	15.2698264	0.035273299
19.08268957	×ÔÉí³µÁ¾	Road 1	34.31886541	44.7230484	-0.001118617	2.55098772	0.952941179	0	51.3485	977.5225	655.7344	4.0005	0.5089	284	3.431396345	0.007926526	15.32836313	0.035408519
19.09912961	×ÔÉí³µÁ¾	Road 1	34.52394528	44.90788307	-0.001146469	2.556393147	0.952941179	0	51.61	977.5254	655.7343	4.0023	0.507	285	5.003614304	0.011558349	15.41062277	0.035598539
19.11568915	×ÔÉí³µÁ¾	Road 1	34.7310835	45.0312973	-0.001182954	2.557899237	0.952941179	0	51.7849	977.5283	655.7343	4.0035	0.5068	286	3.546579174	0.008192598	15.46935249	0.035734204
19.18235839	×ÔÉí³µÁ¾	Road 1	35.57532872	45.58748703	-0.00121186	2.563293457	0.952941179	0	52.5778	977.5371	655.7343	4.0091	0.5013	287	3.921190458	0.00905795	15.73077525	0.036338091
19.19896668	×ÔÉí³µÁ¾	Road 1	35.78649883	45.77306328	-0.001241233	2.563283682	0.945098042	0	52.8443	977.541	655.7343	4.0101	0.5004	288	5.067033813	0.011704848	15.81493003	0.036532488
19.21563215	×ÔÉí³µÁ¾	Road 1	35.99896817	45.89665604	-0.00136347	2.559854507	0.937254906	0	53.0225	977.543	655.7342	4.0114	0.4992	289	3.594517079	0.008303334	15.87483436	0.036670867
19.23237717	×ÔÉí³µÁ¾	Road 1	36.21331186	46.081604	-0.001387248	2.551055193	0.937254906	0	53.2908	977.5459	655.7342	4.0133	0.4973	290	5.048085363	0.011661077	15.95936464	0.036866132
19.24899646	×ÔÉí³µÁ¾	Road 1	36.4266134	46.20447578	-0.001414759	2.543460846	0.937254906	0	53.4702	977.5488	655.7342	4.0136	0.497	291	3.607581623	0.008333514	16.01932009	0.037004629
19.2656722	×ÔÉí³µÁ¾	Road 1	36.64120675	46.32694588	-0.00144497	2.536107302	0.937254906	0	53.6502	977.5508	655.7341	4.0149	0.4958	292	3.596734242	0.008308456	16.07929829	0.037143179
19.28262615	×ÔÉí³µÁ¾	Road 1	36.86024287	46.51009483	-0.001475609	2.528734446	0.937254906	0	53.9209	977.5537	655.7341	4.0169	0.4938	293	4.995234542	0.011538992	16.16398727	0.037338811
19.29900058	×ÔÉí³µÁ¾	Road 1	37.07234588	46.63190231	-0.001509085	2.524701595	0.937254906	0	54.1021	977.5566	655.7341	4.0173	0.4935	294	3.656586052	0.008446714	16.22386178	0.037477121
19.3156283	×ÔÉí³µÁ¾	Road 1	37.28833173	46.76221733	-0.001550411	2.521862507	0.937254906	0	54.2836	977.5586	655.7341	4.0186	0.4922	295	3.826452177	0.008839105	16.28748696	0.037624095
19.33228901	×ÔÉí³µÁ¾	Road 1	37.50558963	46.94448395	-0.001596233	2.520015478	0.937254906	0	54.57	977.5625	655.7341	4.0199	0.491	296	5.094752209	0.011768878	16.37236915	0.037820173
19.34900581	×ÔÉí³µÁ¾	Road 1	37.72414287	47.06594467	-0.00165061	2.519762754	0.937254906	0	54.7528	977.5645	655.7341	4.0223	0.4897	297	3.617562786	0.00835657	16.4328432	0.037959868
19.36569401	×ÔÉí³µÁ¾	Road 1	37.94304613	47.22208786	-0.001716687	2.519841433	0.937254906	0	54.936	977.5664	655.734	4.0237	0.4884	298	4.479284721	0.010347148	16.5075944	0.038132543
19.38228984	×ÔÉí³µÁ¾	Road 1	38.16141774	47.36959991	-0.001776435	2.520858288	0.937254906	0	55.2118	977.5703	655.734	4.0248	0.4873	299	4.301423064	0.009936287	16.57898009	0.038297444
19.39900993	×ÔÉí³µÁ¾	Road 1	38.38198877	47.4911087	-0.001845806	2.521235704	0.937254906	0	55.3963	977.5723	655.734	4.0262	0.4859	300	3.648155187	0.008427238	16.63997758	0.038438348
19.41569264	×ÔÉí³µÁ¾	Road 1	38.60267002	47.62132759	-0.001933965	2.522115469	0.937254906	0	55.5812	977.5752	655.734	4.0266	0.4854	301	3.878340246	0.008958966	16.70467878	0.038587808
19.43234125	×ÔÉí³µÁ¾	Road 1	38.82374378	47.80371094	-0.002027819	2.52329421	0.937254906	0	55.8727	977.5791	655.7339	4.028	0.484	302	5.188831403	0.011986201	16.79106563	0.038787362
19.44895101	×ÔÉí³µÁ¾	Road 1	39.04486281	47.92535019	-0.002135271	2.524044514	0.937254906	0	56.0589	977.5811	655.7339	4.0295	0.4826	303	3.702017523	0.00855166	16.85255525	0.038929403
19.46562821	×ÔÉí³µÁ¾	Road 1	39.2677252	48.10785713	-0.002265351	2.524785519	0.937254906	0	56.339	977.585	655.7339	4.0307	0.4823	304	5.215267123	0.012047267	16.93953133	0.039130317
19.48231825	×ÔÉí³µÁ¾	Road 1	39.49132335	48.22957878	-0.002387502	2.52646637	0.945098042	0	56.5263	977.5869	655.7339	4.0321	0.4809	305	3.711027591	0.008572474	17.00146851	0.039273392
19.49903614	×ÔÉí³µÁ¾	Road 1	39.71586048	48.35141029	-0.002515659	2.529211044	0.945098042	0	56.7141	977.5898	655.7339	4.0326	0.4804	306	3.717321073	0.008587012	17.06361428	0.039416949
19.51566936	×ÔÉí³µÁ¾	Road 1	39.94010642	48.53452492	-0.002679993	2.535778284	0.945098042	0	56.9967	977.5928	655.7339	4.0358	0.4781	307	5.286318746	0.012211396	17.15154278	0.039620064
19.5323374	×ÔÉí³µÁ¾	Road 1	40.1653883	48.65687485	-0.002834796	2.540264845	0.945098042	0	57.1857	977.5957	655.7339	4.0363	0.4776	308	3.761133543	0.008688218	17.21423351	0.039764879
19.54908425	×ÔÉí³µÁ¾	Road 1	40.39234623	48.78818893	-0.003012603	2.544128895	0.945098042	0	57.3887	977.5986	655.7338	4.0371	0.4768	309	3.981037694	0.009196197	17.28090335	0.039918887
19.56562107	×ÔÉí³µÁ¾	Road 1	40.6173037	48.97236443	-0.003219603	2.549577713	0.945098042	0	57.6738	977.6016	655.7338	4.0394	0.4746	310	5.385539108	0.012440595	17.36996301	0.040124615
19.58291225	×ÔÉí³µÁ¾	Road 1	40.85315607	49.1041214	-0.003402627	2.552077055	0.945098042	0	57.8782	977.6045	655.7338	4.0402	0.4738	311	3.911134234	0.00903472	17.43759116	0.040280836
19.63447937	×ÔÉí³µÁ¾	Road 1	41.56308631	49.56159897	-0.003598906	2.556828737	0.945098042	0	58.5907	977.6143	655.7338	4.0444	0.4705	312	4.467694443	0.010320374	17.66797729	0.040813028
19.64958112	×ÔÉí³µÁ¾	Road 1	41.7715108	49.6848587	-0.003818226	2.557173014	0.945098042	0	58.7837	977.6172	655.7338	4.045	0.4699	313	4.186631541	0.009671119	17.73120274	0.040959078
19.66565021	×ÔÉí³µÁ¾	Road 1	41.99395419	49.83457489	-0.004360974	2.557623148	0.945098042	0	58.9772	977.6201	655.7337	4.0455	0.4693	314	4.69413258	0.010843446	17.80663318	0.041133323
19.68226876	×ÔÉí³µÁ¾	Road 1	42.2247357	49.9931179	-0.004452021	2.557799578	0.945098042	0	59.2683	977.624	655.7337	4.0469	0.4679	315	4.804006315	0.011097255	17.88646882	0.041317743
19.69895257	×ÔÉí³µÁ¾	Road 1	42.45699481	50.11643944	-0.004514251	2.558824062	0.945098042	0	59.4629	977.626	655.7336	4.0484	0.4663	316	3.887234683	0.008979512	17.95132268	0.041467555
19.71566789	×ÔÉí³µÁ¾	Road 1	42.69030639	50.24859467	-0.004544327	2.559031725	0.945098042	0	59.672	977.6289	655.7336	4.0503	0.4654	317	4.119565389	0.009516196	18.02018256	0.041626622
19.73228168	×ÔÉí³µÁ¾	Road 1	42.92301375	50.43357353	-0.004546839	2.557970285	0.945098042	0	59.8816	977.6318	655.7336	4.0511	0.4646	318	5.536023335	0.012788214	18.1121569	0.041839082
19.74894569	×ÔÉí³µÁ¾	Road 1	43.15711735	50.57444229	-0.004546839	2.557588816	0.945098042	0	60.1901	977.6367	655.7336	4.0518	0.4638	319	4.382912376	0.010124528	18.18519379	0.042007798
19.76565259	×ÔÉí³µÁ¾	Road 1	43.39243618	50.70647392	-0.004546839	2.556457996	0.945098042	0	60.4011	977.6396	655.7336	4.0527	0.4629	320	4.152924158	0.009593255	18.25457626	0.042168071
19.78227408	×ÔÉí³µÁ¾	Road 1	43.62712068	50.82963409	-0.004546839	2.554350376	0.945098042	0	60.5985	977.6426	655.7336	4.0543	0.4623	321	3.946243813	0.009115823	18.32016871	0.04231959
19.79893589	×ÔÉí³µÁ¾	Road 1	43.86326952	51.0230175	-0.004546839	2.553020954	0.945098042	0	60.9098	977.6475	655.7336	4.055	0.4615	322	5.804863484	0.013409235	18.41688824	0.042543012
19.81561053	×ÔÉí³µÁ¾	Road 1	44.10016994	51.14602661	-0.004546839	2.552113533	0.945098042	0	61.1084	977.6504	655.7336	4.0557	0.4609	323	3.954543139	0.009134995	18.48282882	0.042695335
19.83233428	×ÔÉí³µÁ¾	Road 1	44.33833925	51.26894989	-0.004546839	2.550019264	0.945098042	0	61.3075	977.6533	655.7336	4.0564	0.4612	324	3.951479114	0.009127917	18.5489124	0.042847988
19.84895394	×ÔÉí³µÁ¾	Road 1	44.57583597	51.44439812	-0.004546839	2.548339367	0.945098042	0	61.5214	977.6563	655.7336	4.0583	0.4602	325	5.385417319	0.012440314	18.63841618	0.043054741
19.86565094	×ÔÉí³µÁ¾	Road 1	44.81512929	51.59345856	-0.004546839	2.547228813	0.945098042	0	61.8361	977.6611	655.7335	4.0591	0.4594	326	4.675977512	0.010801508	18.71649098	0.043235094
19.88226986	×ÔÉí³µÁ¾	Road 1	45.05386982	51.71610374	-0.004546839	2.544952393	0.945098042	0	62.037	977.6641	655.7335	4.0598	0.4587	327	3.996597375	0.00923214	18.78291012	0.043388522
19.89899839	×ÔÉí³µÁ¾	Road 1	45.29503913	51.89994965	-0.004546839	2.543271542	0.945098042	0	62.3392	977.6689	655.7335	4.0613	0.4581	328	5.62413444	0.012991751	18.87699358	0.043605855
19.91566863	×ÔÉí³µÁ¾	Road 1	45.53593536	52.02243004	-0.004546839	2.541499615	0.945098042	0	62.5413	977.6719	655.7335	4.062	0.4574	329	4.003880938	0.009248965	18.94373924	0.043760038
19.93232677	×ÔÉí³µÁ¾	Road 1	45.77722312	52.14482117	-0.004546839	2.540260792	0.945098042	0	62.7438	977.6748	655.7335	4.0628	0.4567	330	4.012596384	0.009269098	19.01058165	0.043914444
19.94900984	×ÔÉí³µÁ¾	Road 1	46.01948689	52.27752228	-0.004546839	2.765606403	0.945098042	0	62.9613	977.6777	655.7335	4.0647	0.4557	331	4.29561607	0.009922873	19.08224571	0.044079988
19.96561153	×ÔÉí³µÁ¾	Road 1	46.26162297	52.5060791	-0.004546839	4.328926563	0.945098042	0	63.2087	977.6816	655.7335	4.0653	0.4551	332	6.941681891	0.016035285	19.1974894	0.044346201
19.98242986	×ÔÉí³µÁ¾	Road 1	46.50841168	52.82566109	-0.004546839	4.330067158	0.945098042	0	63.5159	977.6865	655.7335	4.0669	0.4544	333	9.359384864	0.021620179	19.35489861	0.044709816
19.99899307	×ÔÉí³µÁ¾	Road 1	46.75292179	53.14408264	-0.004546839	4.323604584	0.945098042	0	63.825	977.6914	655.7335	4.0676	0.4537	334	9.51618593	0.021982389	19.51251716	0.045073915
20.01559	×ÔÉí³µÁ¾	Road 1	46.9989091	53.3565136	-0.004546839	4.32815218	0.945098042	0	64.0321	977.6953	655.7335	4.0675	0.4549	335	6.605128339	0.015257846	19.62214201	0.045327148
20.03227344	×ÔÉí³µÁ¾	Road 1	47.24716229	53.56879005	-0.004546839	4.320911884	0.945098042	0	64.24	977.6982	655.7335	4.0693	0.454	336	6.595326357	0.015235204	19.73217472	0.045581324
20.04893635	×ÔÉí³µÁ¾	Road 1	47.49609082	53.78068542	-0.004546839	4.316349506	0.945098042	0	64.4488	977.7021	655.7335	4.0692	0.4542	337	6.616957232	0.015285171	19.84243248	0.045836019
20.06638662	×ÔÉí³µÁ¾	Road 1	47.75847263	54.12950134	-0.004546839	4.336667061	0.945098042	0	64.7935	977.707	655.7334	4.0715	0.4528	338	10.04151478	0.023195899	20.01765964	0.046240794
20.08246597	×ÔÉí³µÁ¾	Road 1	48.00118998	54.34189453	-0.004546839	4.29318428	0.945098042	0	65.0044	977.7109	655.7335	4.0714	0.4529	339	6.91379447	0.015970865	20.12882898	0.046497595
20.09896026	×ÔÉí³µÁ¾	Road 1	48.25135934	54.6012886	-0.004546839	3.256417751	0.945098042	0	65.3222	977.7158	655.7335	4.0723	0.4521	340	8.127705056	0.018774999	20.26288973	0.046807275
20.11606927	×ÔÉí³µÁ¾	Road 1	48.51145976	54.7291523	-0.004546839	2.408901215	0.945098042	0	65.5348	977.7197	655.7334	4.0723	0.4521	341	4.256255053	0.009831949	20.33571004	0.04697549
20.13225053	×ÔÉí³µÁ¾	Road 1	48.75787813	54.8230751	-0.004546839	1.781189322	0.945098042	0	65.7478	977.7236	655.7334	4.0722	0.4522	342	3.474062394	0.008025084	20.39192473	0.047105346
20.14896879	×ÔÉí³µÁ¾	Road 1	49.01289688	54.91405907	-0.004546839	2.131448984	0.945098042	0	65.9612	977.7266	655.7334	4.0732	0.4513	343	3.307648358	0.007640668	20.44722285	0.047233085
20.16556718	×ÔÉí³µÁ¾	Road 1	49.26699494	55.11093063	-0.004546839	2.650219679	0.945098042	0	66.3126	977.7324	655.7334	4.0747	0.4508	344	6.367499749	0.014708924	20.55291313	0.047477229
20.18225465	×ÔÉí³µÁ¾	Road 1	49.52303003	55.23464012	-0.004546839	2.457743168	0.945098042	0	66.5271	977.7363	655.7334	4.0756	0.4508	345	4.264285789	0.0098505	20.62407326	0.047641609
20.19894359	×ÔÉí³µÁ¾	Road 1	49.77959585	55.34426994	-0.004546839	2.146817923	0.952941179	0	66.7421	977.7402	655.7334	4.0756	0.4508	346	3.869195971	0.008937843	20.68864602	0.047790772
20.21558963	×ÔÉí³µÁ¾	Road 1	50.03619085	55.49317245	-0.004546839	1.928394079	0.952941179	0	67.0808	977.7461	655.7334	4.0759	0.4506	347	5.015721507	0.011586317	20.77213796	0.047983639
20.23232549	×ÔÉí³µÁ¾	Road 1	50.29459814	55.58522758	-0.004546839	1.957153559	0.952941179	0	67.2967	977.75	655.7334	4.0759	0.4515	348	3.372383211	0.007790205	20.82857768	0.048114014
20.24889273	×ÔÉí³µÁ¾	Road 1	50.55083286	55.678862	-0.004546839	1.980307817	0.952941179	0	67.5131	977.7539	655.7334	4.0769	0.4515	349	3.450269195	0.007970122	20.88573911	0.048246057
20.26557323	×ÔÉí³µÁ¾	Road 1	50.80928532	55.77942123	-0.004546839	1.966982484	0.952941179	0	67.7453	977.7578	655.7334	4.0773	0.4512	350	3.637248558	0.008402044	20.94641025	0.048386208
20.28226363	×ÔÉí³µÁ¾	Road 1	51.0685841	55.92889023	-0.004546839	1.863687158	0.952941179	0	68.1021	977.7637	655.7334	4.0789	0.4506	351	5.057680113	0.011683241	21.03082496	0.048581206
20.29893607	×ÔÉí³µÁ¾	Road 1	51.32800247	56.01496468	-0.004546839	1.789567113	0.952941179	0	68.3197	977.7676	655.7334	4.0789	0.4506	352	3.232900931	0.007468001	21.08472531	0.048705715
20.3156525	×ÔÉí³µÁ¾	Road 1	51.58849076	56.09798355	-0.004546839	1.742238641	0.952941179	0	68.5377	977.7715	655.7334	4.079	0.4506	353	3.142187867	0.007258454	21.13725146	0.048827051
20.33232824	×ÔÉí³µÁ¾	Road 1	51.84896279	56.23135071	-0.004546839	1.719400883	0.952941179	0	68.8965	977.7783	655.7334	4.0796	0.4509	354	4.619216272	0.01067039	21.2142803	0.049004988
20.34901351	×ÔÉí³µÁ¾	Road 1	52.10998452	56.31783371	-0.004546839	1.710428834	0.952941179	0	69.1309	977.7822	655.7334	4.08	0.4506	355	3.258737743	0.007527684	21.26865322	0.049130589
20.36559247	×ÔÉí³µÁ¾	Road 1	52.36971025	56.39751549	-0.004546839	1.679729819	0.952941179	0	69.3501	977.7861	655.7334	4.08	0.4505	356	3.079465116	0.007113564	21.31970757	0.049248524
20.3823078	×ÔÉí³µÁ¾	Road 1	52.63210957	56.51325645	-0.004546839	1.616692543	0.952941179	0	69.6794	977.792	655.7334	4.0811	0.4505	357	4.117788569	0.009512092	21.38853776	0.049407522
20.39894798	×ÔÉí³µÁ¾	Road 1	52.89370112	56.59370384	-0.004546839	1.599283695	0.952941179	0	69.915	977.7969	655.7334	4.0805	0.4511	358	3.102969132	0.007167859	21.44017173	0.049526797
20.41557644	×ÔÉí³µÁ¾	Road 1	53.15545471	56.66870613	-0.004546839	1.607662916	0.952941179	0	70.1352	977.8008	655.7334	4.0806	0.451	359	2.948209719	0.006810364	21.4891959	0.049640043
20.4338181	×ÔÉí³µÁ¾	Road 1	53.44314858	56.77649574	-0.004546839	1.610054493	0.952941179	0	70.4503	977.8066	655.7334	4.0815	0.4521	360	3.638148416	0.008404123	21.55556179	0.049793348
20.44922153	×ÔÉí³µÁ¾	Road 1	53.68640007	56.8513504	-0.004546839	1.590281725	0.952941179	0	70.6712	977.8105	655.7334	4.0816	0.452	361	3.128171534	0.007226076	21.60374634	0.049904654
20.46565387	×ÔÉí³µÁ¾	Road 1	53.94623698	56.92509613	-0.004546839	1.569552064	0.952941179	0	70.8924	977.8145	655.7334	4.0817	0.4519	362	2.949092046	0.006812403	21.65220684	0.050016598
20.48223834	×ÔÉí³µÁ¾	Road 1	54.20903272	57.0452282	-0.004546839	1.569129109	0.952941179	0	71.2564	977.8223	655.7334	4.0815	0.4531	363	4.310924435	0.009958235	21.72370122	0.05018175
20.49892801	×ÔÉí³µÁ¾	Road 1	54.47383629	57.1187439	-0.004546839	1.576827645	0.952941179	0	71.4784	977.8262	655.7334	4.0816	0.453	364	2.91718072	0.006738687	21.772388	0.050294216
20.51559348	×ÔÉí³µÁ¾	Road 1	54.73859683	57.19236259	-0.004546839	1.57351625	0.952941179	0	71.7006	977.8301	655.7334	4.0817	0.4528	365	2.926764851	0.006760827	21.82116392	0.050406889
20.53224466	×ÔÉí³µÁ¾	Road 1	55.00363694	57.30191002	-0.004546839	1.556325197	0.952941179	0	72.0345	977.8369	655.7334	4.0813	0.4528	366	4.000478857	0.009241106	21.88777662	0.050560764
20.54890244	×ÔÉí³µÁ¾	Road 1	55.2691413	57.37954559	-0.004546839	1.552221537	0.952941179	0	72.2734	977.8418	655.7334	4.0807	0.4534	367	3.0557958	0.007058888	21.93867938	0.050678349
20.56595207	×ÔÉí³µÁ¾	Road 1	55.54123475	57.45207596	-0.004546839	1.557404518	0.952941179	0	72.4966	977.8457	655.7334	4.0809	0.4532	368	2.857661332	0.006601198	21.98740144	0.050790897
20.58222239	×ÔÉí³µÁ¾	Road 1	55.80140846	57.5664711	-0.004546839	1.560249805	0.952941179	0	72.848	977.8525	655.7334	4.0804	0.4527	369	4.24205524	0.009799148	22.05642107	0.050950333
20.59896448	×ÔÉí³µÁ¾	Road 1	56.06946375	57.63911819	-0.004546839	1.554242849	0.952941179	0	73.072	977.8574	655.7335	4.0796	0.4536	370	2.908361534	0.006718315	22.10511311	0.051062811
20.61558853	×ÔÉí³µÁ¾	Road 1	56.33596324	57.71144257	-0.004546839	1.547796726	0.952941179	0	73.2963	977.8613	655.7335	4.0798	0.4534	371	2.917321948	0.006739014	22.15361083	0.051174841
20.63231046	×ÔÉí³µÁ¾	Road 1	56.60453461	57.81971283	-0.004546839	1.548926473	0.952941179	0	73.6332	977.8682	655.7335	4.0791	0.4532	372	3.981959778	0.009198327	22.22019686	0.051328655
20.64935165	×ÔÉí³µÁ¾	Road 1	56.8785762	57.89205093	-0.004546839	1.552147031	0.952941179	0	73.8581	977.873	655.7335	4.0773	0.454	373	2.872673308	0.006635875	22.26915065	0.051441738
20.66560145	×ÔÉí³µÁ¾	Road 1	57.14021805	57.96444397	-0.004546839	1.551688313	0.952941179	0	74.0834	977.877	655.7335	4.0775	0.4538	374	2.981077447	0.006886289	22.31759256	0.051553639
20.68229332	×ÔÉí³µÁ¾	Road 1	57.4095038	58.07790527	-0.004546839	1.545669913	0.952941179	0	74.4379	977.8848	655.7335	4.0761	0.4542	375	4.16005288	0.009609722	22.38703161	0.051714043
20.69891958	×ÔÉí³µÁ¾	Road 1	57.67806365	58.14992752	-0.004546839	1.544773698	0.952941179	0	74.6639	977.8887	655.7335	4.0763	0.454	376	2.92780897	0.006763239	22.43571011	0.05182649
20.71560961	×ÔÉí³µÁ¾	Road 1	57.94798777	58.22197723	-0.004546839	1.54613626	0.952941179	0	74.8901	977.8936	655.7335	4.0755	0.4548	377	2.923569492	0.006753446	22.48450458	0.051939206
20.73230734	×ÔÉí³µÁ¾	Road 1	58.21856197	58.33529434	-0.004546839	1.546723247	0.952941179	0	75.2462	977.9014	655.7335	4.0742	0.4552	378	4.1716271	0.009636459	22.5541613	0.052100113
20.74896805	×ÔÉí³µÁ¾	Road 1	58.48886973	58.40735092	-0.004546839	1.545197606	0.952941179	0	75.4732	977.9053	655.7335	4.0744	0.455	379	2.935967632	0.006782085	22.6030766	0.052213107
20.76561703	×ÔÉí³µÁ¾	Road 1	58.75931992	58.47929764	-0.004546839	1.542551398	0.952941179	0	75.7004	977.9102	655.7335	4.0736	0.4557	380	2.937424498	0.006785451	22.65198173	0.052326078
20.78225062	×ÔÉí³µÁ¾	Road 1	59.03004198	58.59226456	-0.004546839	1.542381406	0.952941179	0	76.0581	977.918	655.7335	4.0723	0.456	381	4.191296	0.009681894	22.721698	0.052487122
20.81569337	×ÔÉí³µÁ¾	Road 1	59.5755845	58.73096008	-0.004546839	1.543690205	0.952941179	0	76.4001	977.9248	655.7335	4.0717	0.4567	382	2.859215151	0.006604787	22.81731802	0.052708005
20.83224668	×ÔÉí³µÁ¾	Road 1	59.84620408	58.85412369	-0.004546839	1.540529728	0.952941179	0	76.8898	977.9355	655.7336	4.0699	0.4575	383	4.538111368	0.010483037	22.89243878	0.052881534
20.84891948	×ÔÉí³µÁ¾	Road 1	60.11910957	58.92587814	-0.004546839	1.539873123	0.952941179	0	77.1188	977.9404	655.7336	4.0682	0.4582	384	2.948567718	0.006811191	22.94159968	0.052995095
20.86565827	×ÔÉí³µÁ¾	Road 1	60.39345246	59.00274811	-0.004546839	1.5401057	0.952941179	0	77.3644	977.9453	655.7336	4.0677	0.4577	385	3.099013265	0.007158721	22.9934734	0.053114924
20.88230688	×ÔÉí³µÁ¾	Road 1	60.66681524	59.11038666	-0.004546839	1.539804459	0.952941179	0	77.7089	977.9531	655.7336	4.0662	0.4592	386	4.059421044	0.009377263	23.06105714	0.053271042
20.89892544	×ÔÉí³µÁ¾	Road 1	60.9400155	59.18209305	-0.004546839	1.538467526	0.952941179	0	77.9388	977.958	655.7336	4.0655	0.4599	387	2.96579334	0.006850983	23.11034434	0.053384895
20.91555609	×ÔÉí³µÁ¾	Road 1	61.21374562	59.25374451	-0.004546839	1.537572384	0.952941179	0	78.1691	977.9629	655.7336	4.0648	0.4597	388	2.965726972	0.006850829	23.15966631	0.053498829
20.93227729	×ÔÉí³µÁ¾	Road 1	61.489465	59.36118393	-0.004546839	1.53771162	0.952941179	0	78.515	977.9707	655.7336	4.0632	0.4612	389	4.054903441	0.009366827	23.22746913	0.053655454
20.96563499	×ÔÉí³µÁ¾	Road 1	62.04116604	59.54017181	-0.004546839	1.536674619	0.952941179	0	79.0928	977.9834	655.7337	4.061	0.4624	390	3.519839362	0.008130829	23.34488291	0.05392668
20.98228727	×ÔÉí³µÁ¾	Road 1	62.31690795	59.61171341	-0.004546839	1.535550237	0.952941179	0	79.3245	977.9883	655.7337	4.0604	0.4631	391	2.975563919	0.006873553	23.39443283	0.05404114
20.99887797	×ÔÉí³µÁ¾	Road 1	62.59195957	59.68319321	-0.004546839	1.53461349	0.952941179	0	79.5564	977.9941	655.7338	4.0587	0.4647	392	2.985074898	0.006895523	23.44395731	0.054155541
21.0155911	×ÔÉí³µÁ¾	Road 1	62.86953862	59.79039917	-0.004554382	1.53500092	0.952941179	0	79.9048	978.002	655.7338	4.0572	0.4652	393	4.076470871	0.009416648	23.51208789	0.054312923
21.03223348	×ÔÉí³µÁ¾	Road 1	63.14627298	59.86184464	-0.004556898	1.534564018	0.952941179	0	80.1374	978.0068	655.7338	4.0566	0.4659	394	2.98513248	0.006895656	23.5617676	0.054427683
21.04897154	×ÔÉí³µÁ¾	Road 1	63.42493031	59.93327637	-0.004561932	1.534012437	0.952941179	0	80.3703	978.0117	655.7338	4.0549	0.4665	395	2.975212154	0.00687274	23.61156686	0.054542719
21.0656788	×ÔÉí³µÁ¾	Road 1	63.70359561	60.04544678	-0.004566971	1.532503486	0.952941179	0	80.7368	978.0205	655.7338	4.0527	0.4677	396	4.247669433	0.009812116	23.68253379	0.054706653
21.08223577	×ÔÉí³µÁ¾	Road 1	63.98008229	60.11678238	-0.004577059	1.532544136	0.952941179	0	80.9704	978.0254	655.7338	4.052	0.4683	397	3.004628343	0.006940691	23.73228135	0.05482157
21.0989544	×ÔÉí³µÁ¾	Road 1	64.25976522	60.22376175	-0.00459728	1.532397509	0.952941179	0	81.3213	978.0342	655.7339	4.0495	0.4698	398	4.095726114	0.009461127	23.80075626	0.054979747
21.11562647	×ÔÉí³µÁ¾	Road 1	64.53899952	60.29504929	-0.004609948	1.531227231	0.952941179	0	81.5556	978.0391	655.7339	4.0488	0.4704	399	2.995662262	0.00691998	23.85070016	0.055095117
21.13228278	×ÔÉí³µÁ¾	Road 1	64.81829953	60.36630936	-0.004630265	1.530814052	0.952941179	0	81.7902	978.0449	655.7339	4.0472	0.472	400	3.000100101	0.006930231	23.90067076	0.055210549
21.14900581	×ÔÉí³µÁ¾	Road 1	65.0992145	60.47314453	-0.004648092	1.530430913	0.952941179	0	82.1425	978.0527	655.7339	4.0458	0.4724	401	4.106079152	0.009485043	23.96933683	0.055369168
21.16560347	×ÔÉí³µÁ¾	Road 1	65.37835185	60.54433594	-0.004655746	1.529647708	0.952941179	0	82.3778	978.0586	655.7339	4.0442	0.474	402	3.01381002	0.006961901	24.01935903	0.055484719
21.18232173	×ÔÉí³µÁ¾	Road 1	65.6598479	60.61550674	-0.004671079	1.529551268	0.952941179	0	82.6133	978.0635	655.7339	4.0436	0.4746	403	3.000158776	0.006930367	24.06951646	0.055600583
21.1989106	×ÔÉí³µÁ¾	Road 1	65.93968036	60.72729263	-0.004686446	1.52843678	0.952941179	0	82.984	978.0723	655.734	4.0415	0.4757	404	4.305516238	0.009945743	24.14094009	0.055765572
21.2156043	×ÔÉí³µÁ¾	Road 1	66.22161096	60.79839478	-0.004701846	1.527802944	0.952941179	0	83.2203	978.0781	655.734	4.04	0.4772	405	3.009439676	0.006951806	24.19117877	0.055881623
21.23227674	×ÔÉí³µÁ¾	Road 1	66.50351168	60.86946945	-0.004704416	1.527796865	0.952941179	0	83.4568	978.084	655.734	4.0384	0.4788	406	3.014598381	0.006963722	24.24143948	0.055997725
21.24896824	×ÔÉí³µÁ¾	Road 1	66.78620525	60.97096252	-0.004704416	1.527022958	0.952941179	0	83.6936	978.0898	655.7341	4.0359	0.4794	407	3.975438195	0.009183262	24.30779551	0.056151008
21.26553694	×ÔÉí³µÁ¾	Road 1	67.06716929	61.04704971	-0.004704416	1.526392221	0.952941179	0	84.0493	978.0986	655.7341	4.0336	0.4817	408	3.196006432	0.007382775	24.3607492	0.056273331
21.28224017	×ÔÉí³µÁ¾	Road 1	67.35090846	61.15350037	-0.004704416	1.525265455	0.952941179	0	84.4056	978.1064	655.7341	4.0322	0.4831	409	4.140785322	0.009565214	24.42991369	0.056433101
21.33230404	×ÔÉí³µÁ¾	Road 1	68.20402468	61.34600143	-0.004704416	1.524177551	0.952941179	0	85.052	978.123	655.7342	4.0273	0.4871	410	2.812424413	0.0064967	24.57071455	0.056758351
21.34900104	×ÔÉí³µÁ¾	Road 1	68.48918471	61.48267136	-0.004704416	1.523411274	0.952941179	0	85.5125	978.1338	655.7343	4.025	0.4886	411	5.122473512	0.011832914	24.65624448	0.056955925
21.36561667	×ÔÉí³µÁ¾	Road 1	68.77328181	61.55348511	-0.004704416	1.522435427	0.952941179	0	85.7516	978.1396	655.7343	4.0235	0.4901	412	3.044524083	0.007032851	24.70683115	0.05707278
21.38228947	×ÔÉí³µÁ¾	Road 1	69.05870796	61.6293457	-0.004704416	1.522430897	0.952941179	0	86.0082	978.1465	655.7343	4.0213	0.4923	413	3.20115313	0.007394664	24.76020336	0.05719607
21.39895605	×ÔÉí³µÁ¾	Road 1	69.34451883	61.73548737	-0.004704416	1.521552086	0.952941179	0	86.3679	978.1553	655.7343	4.019	0.4936	414	4.174962805	0.009644164	24.82978569	0.057356805
21.41562042	×ÔÉí³µÁ¾	Road 1	69.63066616	61.81631927	-0.004704416	1.520948648	0.952941179	0	86.6424	978.1621	655.7344	4.0172	0.4954	415	3.370353214	0.007785516	24.88595052	0.057486546
21.43229066	×ÔÉí³µÁ¾	Road 1	69.91724156	61.8870163	-0.004709559	1.520692825	0.952941179	0	86.8829	978.168	655.7344	4.0157	0.4969	416	3.048198167	0.007041338	24.93676472	0.057603926
21.44891619	×ÔÉí³µÁ¾	Road 1	70.20337465	61.95770645	-0.004709559	1.52032733	0.952941179	0	87.1236	978.1738	655.7344	4.0132	0.4974	417	3.057222302	0.007062184	24.98759263	0.057721339
21.46561942	×ÔÉí³µÁ¾	Road 1	70.49121977	62.03844223	-0.004709559	1.519539237	0.952941179	0	87.3991	978.1816	655.7344	4.0104	0.5002	418	3.372264902	0.007789932	25.04392035	0.057851456
21.48221121	×ÔÉí³µÁ¾	Road 1	70.7776792	62.15444412	-0.004709559	1.519203186	0.952941179	0	87.7957	978.1914	655.7345	4.0078	0.5018	419	4.535324526	0.0104766	25.11916954	0.058025282
21.51561767	×ÔÉí³µÁ¾	Road 1	71.35547498	62.26534424	-0.004709559	1.518135905	0.952941179	0	88.1758	978.2012	655.7346	4.005	0.5047	420	2.569022119	0.005934441	25.20499147	0.05822353
21.53219334	×ÔÉí³µÁ¾	Road 1	71.6428392	62.41142807	-0.004709559	1.517428756	0.952941179	0	88.6778	978.2139	655.7346	4.0014	0.5073	421	5.533301405	0.012781926	25.29670965	0.058435399
21.54893873	×ÔÉí³µÁ¾	Road 1	71.93347358	62.4819191	-0.004712132	1.517140746	0.952941179	0	88.9205	978.2207	655.7346	3.999	0.5097	422	3.05772315	0.00706334	25.3479124	0.058553678
21.56560127	×ÔÉí³µÁ¾	Road 1	72.22299629	62.55238266	-0.004712132	1.516175389	0.952941179	0	89.1636	978.2266	655.7347	3.9975	0.5111	423	3.07125183	0.007094592	25.39908726	0.058671892
21.58226345	×ÔÉí³µÁ¾	Road 1	72.51300154	62.6580162	-0.004719856	1.515836596	0.952941179	0	89.5287	978.2363	655.7347	3.9944	0.5133	424	4.217335641	0.009742045	25.46935725	0.058834215
21.5989062	×ÔÉí³µÁ¾	Road 1	72.80299413	62.72841797	-0.004719856	1.515014529	0.952941179	0	89.7724	978.2432	655.7347	3.992	0.5157	425	3.07976866	0.007114266	25.52061307	0.058952616
21.61560759	×ÔÉí³µÁ¾	Road 1	73.09433513	62.79879227	-0.004719856	1.51503253	0.952941179	0	90.0164	978.249	655.7347	3.9906	0.5171	426	3.073939951	0.007100801	25.57195216	0.059071209
21.63220966	×ÔÉí³µÁ¾	Road 1	73.38445305	62.90932846	-0.00472501	1.513750672	0.952941179	0	90.4004	978.2598	655.7348	3.9868	0.5199	427	4.405798001	0.010177393	25.64509749	0.059240175
21.64888869	×ÔÉí³µÁ¾	Road 1	73.67624186	62.97963409	-0.00472501	1.513545513	0.952941179	0	90.6451	978.2656	655.7349	3.9844	0.5213	428	3.082766388	0.00712119	25.69651507	0.05935895
21.66555747	×ÔÉí³µÁ¾	Road 1	73.9683392	63.08504791	-0.004732748	1.51285851	0.952941179	0	91.0127	978.2754	655.7349	3.9813	0.5234	429	4.235511635	0.009784032	25.76711586	0.059522038
21.68230139	×ÔÉí³µÁ¾	Road 1	74.26207998	63.15527802	-0.004743079	1.512263656	0.952941179	0	91.2581	978.2822	655.7349	3.9789	0.5258	430	3.079161972	0.007112864	25.81867309	0.059641135
21.69893497	×ÔÉí³µÁ¾	Road 1	74.5542096	63.22549438	-0.004745664	1.511837125	0.952941179	0	91.5037	978.2891	655.735	3.9766	0.5282	431	3.096995939	0.007154061	25.87018724	0.059760133
21.71560924	×ÔÉí³µÁ¾	Road 1	74.84740215	63.30070267	-0.004758603	1.511467814	0.952941179	0	91.7673	978.2959	655.735	3.9745	0.5302	432	3.258277354	0.007526621	25.92451664	0.059885633
21.73223513	×ÔÉí³µÁ¾	Road 1	75.14009106	63.37586975	-0.004768972	1.51064992	0.952941179	0	92.0311	978.3037	655.735	3.9714	0.5323	433	3.26762138	0.007548205	25.97884375	0.060011129
21.74889621	×ÔÉí³µÁ¾	Road 1	75.43397903	63.50110016	-0.004781953	1.510608673	0.952941179	0	92.4715	978.3154	655.7351	3.9676	0.536	434	4.914612221	0.011352754	26.06072648	0.060200278
21.76555985	×ÔÉí³µÁ¾	Road 1	75.72823665	63.5711792	-0.004792355	1.509527564	0.952941179	0	92.7185	978.3223	655.7352	3.9653	0.5373	435	3.103592004	0.007169298	26.11244363	0.060319745
21.78283601	×ÔÉí³µÁ¾	Road 1	76.03364677	63.64125824	-0.004800167	1.509083033	0.952941179	0	92.9657	978.3291	655.7352	3.9629	0.5397	436	3.024724262	0.006987113	26.16469924	0.060440455
21.7988798	×ÔÉí³µÁ¾	Road 1	76.31773917	63.74630127	-0.004823652	1.508426309	0.952941179	0	93.3372	978.3389	655.7352	3.9598	0.5427	437	4.399683124	0.010163268	26.23528686	0.060603513
21.81557534	×ÔÉí³µÁ¾	Road 1	76.61372001	63.82132416	-0.004844592	1.508003116	0.952941179	0	93.6028	978.3467	655.7352	3.9568	0.5447	438	3.273336645	0.007561408	26.28993696	0.060729754
21.83220966	×ÔÉí³µÁ¾	Road 1	76.90893899	63.89130707	-0.004868222	1.507828832	0.952941179	0	93.8511	978.3535	655.7353	3.9544	0.547	439	3.118620483	0.007204013	26.34181308	0.060849588
21.84893525	×ÔÉí³µÁ¾	Road 1	77.20626539	63.9962471	-0.004884018	1.506926656	0.952941179	0	94.224	978.3643	655.7354	3.9495	0.551	440	4.264885903	0.009851886	26.41314582	0.061014367
21.86559816	×ÔÉí³µÁ¾	Road 1	77.50282429	64.07116699	-0.004905133	1.506478786	0.952941179	0	94.4907	978.3711	655.7354	3.9474	0.552	441	3.286432095	0.007591658	26.46790734	0.061140866
21.88221928	×ÔÉí³µÁ¾	Road 1	77.79896215	64.14105377	-0.004936918	1.50609374	0.952941179	0	94.7399	978.3789	655.7355	3.9441	0.5553	442	3.128291317	0.007226353	26.51990305	0.061260976
21.89892471	×ÔÉí³µÁ¾	Road 1	78.09708838	64.24584274	-0.004976843	1.504981637	0.952941179	0	95.1142	978.3896	655.7355	3.9401	0.5582	443	4.279548858	0.009885758	26.59139476	0.061426122
21.91567083	×ÔÉí³µÁ¾	Road 1	78.39628872	64.32065277	-0.00502235	1.505154014	0.952941179	0	95.382	978.3965	655.7355	3.9381	0.5602	444	3.282013052	0.00758145	26.64635573	0.061553082
21.9489072	×ÔÉí³µÁ¾	Road 1	78.99126883	64.44529953	-0.005095195	1.50424695	0.952941179	0	95.8289	978.4102	655.7356	3.9325	0.5658	445	2.887899603	0.006671048	26.74233906	0.061774803
21.96556975	×ÔÉí³µÁ¾	Road 1	79.29017551	64.57982025	-0.005168742	1.502815247	0.952941179	0	96.3126	978.4238	655.7357	3.9276	0.5697	446	5.303248009	0.012250503	26.83070466	0.061978928
21.98227958	×ÔÉí³µÁ¾	Road 1	79.59025389	64.6495079	-0.005334704	1.502562881	0.952941179	0	96.5637	978.4307	655.7357	3.9252	0.5719	447	3.131606763	0.007234012	26.88303327	0.062099807
21.99886368	×ÔÉí³µÁ¾	Road 1	79.88839548	64.71920242	-0.005421826	1.50289309	0.952941179	0	96.8152	978.4385	655.7358	3.922	0.5742	448	3.152566178	0.007282428	26.93531574	0.062220579
22.0156043	×ÔÉí³µÁ¾	Road 1	80.18985991	64.82866058	-0.005527047	1.501563907	0.952941179	0	97.2109	978.4502	655.7358	3.9174	0.5787	449	4.464297216	0.010312527	27.01005084	0.062393217
22.03223935	×ÔÉí³µÁ¾	Road 1	80.489768	64.90326462	-0.005662656	1.501749158	0.952941179	0	97.481	978.458	655.7359	3.9135	0.5816	450	3.318819303	0.007666473	27.06525957	0.06252075
22.04886377	×ÔÉí³µÁ¾	Road 1	80.78980581	64.97285614	-0.0057798	1.500471354	0.952941179	0	97.7335	978.4648	655.736	3.9112	0.5829	451	3.154556053	0.007287024	27.11770224	0.062641892
22.06553034	×ÔÉí³µÁ¾	Road 1	81.09108751	65.07720566	-0.00589855	1.500342369	0.952941179	0	98.1126	978.4766	655.736	3.9063	0.5877	452	4.32449497	0.009989583	27.18977676	0.062808384
22.08448643	×ÔÉí³µÁ¾	Road 1	81.43412284	65.14674225	-0.006034074	1.499325752	0.952941179	0	98.3658	978.4844	655.7361	3.9031	0.5899	453	2.870834435	0.006631628	27.24419654	0.062934094
22.09980737	×ÔÉí³µÁ¾	Road 1	81.71181922	65.25098877	-0.006131699	1.499376655	0.952941179	0	98.7459	978.4951	655.7361	3.8992	0.5938	454	4.641303768	0.010721412	27.31530571	0.063098356
22.11550111	×ÔÉí³µÁ¾	Road 1	81.99657534	65.32046356	-0.006227273	1.498560309	0.952941179	0	98.9997	978.5029	655.7362	3.896	0.597	455	3.305701635	0.007636171	27.36718452	0.063218196
22.13222963	×ÔÉí³µÁ¾	Road 1	82.3004299	65.38989716	-0.006267645	1.497927308	0.952941179	0	99.2538	978.5107	655.7362	3.8928	0.5992	456	3.15284435	0.00728307	27.41992695	0.063340031
22.14890061	×ÔÉí³µÁ¾	Road 1	82.60372141	65.49404068	-0.006292577	1.497609854	0.952941179	0	99.6353	978.5225	655.7363	3.888	0.604	457	4.342374051	0.010030884	27.49231855	0.063507256
22.19890143	×ÔÉí³µÁ¾	Road 1	83.51640278	65.7119751	-0.00629882	1.495784998	0.952941179	0	100.4368	978.5469	655.7365	3.8784	0.6128	458	3.2821653	0.007581802	27.65642952	0.063886352
22.21552952	×ÔÉí³µÁ¾	Road 1	83.82042375	65.82089081	-0.006308192	1.495897532	0.952941179	0	100.8385	978.5596	655.7366	3.8724	0.6172	459	4.534704716	0.010475168	27.73183298	0.064060534
22.23225511	×ÔÉí³µÁ¾	Road 1	84.12654922	65.89015274	-0.006308192	1.494255543	0.952941179	0	101.0945	978.5674	655.7366	3.8692	0.6204	460	3.169255247	0.00732098	27.78484065	0.064182982
22.28227719	×ÔÉí³µÁ¾	Road 1	85.04545983	66.13235321	-0.006308192	1.492764115	0.952941179	0	101.9926	978.5957	655.7368	3.8571	0.6304	461	3.576493219	0.008261699	27.9637443	0.064596249
22.29888402	×ÔÉí³µÁ¾	Road 1	85.35084796	66.20152588	-0.006308192	1.493370533	0.952941179	0	102.2498	978.6035	655.7368	3.8539	0.6335	462	3.196682451	0.007384336	28.01683105	0.06471888
22.3155319	×ÔÉí³µÁ¾	Road 1	85.65737919	66.29039154	-0.006308192	1.491924286	0.952941179	0	102.5441	978.6133	655.7369	3.8495	0.637	463	3.87151197	0.008943193	28.08128352	0.064867765
22.34897428	×ÔÉí³µÁ¾	Road 1	86.27469992	66.45323639	-0.006308192	1.491522193	0.952941179	0	103.189	978.6338	655.7371	3.8406	0.6457	464	3.609875039	0.008338811	28.20200634	0.065146635
22.36552539	×ÔÉí³µÁ¾	Road 1	86.58071946	66.56171951	-0.006308192	1.490819097	0.952941179	0	103.5952	978.6465	655.7371	3.8343	0.65	465	4.584901259	0.010591122	28.27789155	0.065321929
22.38216668	×ÔÉí³µÁ¾	Road 1	86.88872523	66.63072739	-0.006308192	1.489439845	0.952941179	0	103.8541	978.6553	655.7372	3.8302	0.6541	466	3.204810604	0.007403112	28.33122371	0.065445127
22.39889483	×ÔÉí³µÁ¾	Road 1	87.19865941	66.69970093	-0.006308192	1.489917397	0.952941179	0	104.1132	978.6641	655.7372	3.826	0.6572	467	3.194230093	0.007378672	28.38465729	0.065568558
22.41557827	×ÔÉí³µÁ¾	Road 1	87.50826723	66.80806732	-0.00629882	1.488555193	0.952941179	0	104.521	978.6768	655.7373	3.8207	0.6619	468	4.566747506	0.010549187	28.46084633	0.065744555
22.44894148	×ÔÉí³µÁ¾	Road 1	88.12837281	66.91143494	-0.00628322	1.488707662	0.952941179	0	104.9108	978.6895	655.7374	3.8151	0.6675	469	2.610593089	0.00603047	28.54794409	0.065945751
22.46553254	×ÔÉí³µÁ¾	Road 1	88.43737756	67.04916916	-0.006270758	1.487082958	0.952941179	0	105.4315	978.707	655.7375	3.8069	0.6747	470	5.626873506	0.012998078	28.64129991	0.066161403
22.48223761	×ÔÉí³µÁ¾	Road 1	88.7488249	67.1179985	-0.006202514	1.487304091	0.945098042	0	105.6922	978.7158	655.7376	3.8028	0.6787	471	3.210691366	0.007416697	28.69493471	0.066285299
22.49885726	×ÔÉí³µÁ¾	Road 1	89.05915575	67.22107086	-0.006147048	1.484200716	0.937254906	0	106.0838	978.7295	655.7377	3.7962	0.6843	472	4.422855768	0.010216797	28.76844105	0.066455099
22.51565286	×ÔÉí³µÁ¾	Road 1	89.37309104	67.28946075	-0.006079706	1.476157784	0.929411769	0	106.3452	978.7383	655.7378	3.7912	0.6883	473	3.190021221	0.007368949	28.82201938	0.066578865
22.53223476	×ÔÉí³µÁ¾	Road 1	89.68334531	67.35750046	-0.005979618	1.467995167	0.921568632	0	106.6069	978.7471	655.7379	3.7871	0.6914	474	3.211195458	0.007417862	28.87526711	0.066701867
22.54886578	×ÔÉí³µÁ¾	Road 1	89.99498627	67.4587326	-0.005874671	1.453401208	0.905882359	0	106.9999	978.7598	655.7379	3.7815	0.6969	475	4.370565289	0.010096006	28.94795406	0.066869774
22.56557488	×ÔÉí³µÁ¾	Road 1	90.30840031	67.52552948	-0.005756244	1.441039085	0.898039222	0	107.2622	978.7686	655.738	3.7774	0.7	476	3.156880804	0.007292395	29.00070269	0.066991623
22.58225502	×ÔÉí³µÁ¾	Road 1	90.62159941	67.5963707	-0.005601794	1.426695943	0.882352948	0	107.5436	978.7783	655.738	3.7728	0.7046	477	3.30542678	0.007635536	29.05583766	0.067118985
22.59885708	×ÔÉí³µÁ¾	Road 1	90.93378347	67.69416275	-0.005438798	1.403337359	0.866666675	0	107.938	978.792	655.7382	3.7662	0.7102	478	4.269945954	0.009863575	29.12672756	0.067282741
22.61551742	×ÔÉí³µÁ¾	Road 1	91.24736011	67.75826111	-0.005265128	1.385369658	0.858823538	0	108.2012	978.8008	655.7382	3.7622	0.7142	479	3.078823961	0.007112083	29.17802183	0.06740123
22.63231816	×ÔÉí³µÁ¾	Road 1	91.5638742	67.82148056	-0.005046554	1.368020058	0.835294127	0	108.4647	978.8105	655.7383	3.7572	0.7191	480	3.031950558	0.007003806	29.22896082	0.0675189
22.64892242	×ÔÉí³µÁ¾	Road 1	91.87713608	67.91888123	-0.004849837	1.335229278	0.819607854	0	108.8792	978.8242	655.7384	3.751	0.7243	481	4.268859774	0.009861066	29.29984208	0.067682635
22.66558716	×ÔÉí³µÁ¾	Road 1	92.19181929	67.97942276	-0.004648092	1.312581778	0.796078444	0	109.1433	978.834	655.7385	3.745	0.7293	482	2.962028608	0.006842286	29.34920353	0.06779666
22.68225593	×ÔÉí³µÁ¾	Road 1	92.50687273	68.04293747	-0.004412496	1.285301089	0.764705896	0	109.4265	978.8438	655.7385	3.7404	0.7329	483	3.068789436	0.007088904	29.40035649	0.067914823
22.69894157	×ÔÉí³µÁ¾	Road 1	92.82264424	68.12910461	-0.004189755	1.23906827	0.741176486	0	109.8235	978.8574	655.7386	3.7338	0.7394	484	3.868467715	0.00893616	29.46490433	0.068063929
22.71559751	×ÔÉí³µÁ¾	Road 1	93.13811007	68.18448257	-0.003956289	1.205445528	0.709803939	0	110.0884	978.8672	655.7387	3.7289	0.7433	485	2.788671676	0.006441832	29.51135229	0.068171224
22.73220837	×ÔÉí³µÁ¾	Road 1	93.4530904	68.26433258	-0.003692154	1.15305078	0.678431392	0	110.4861	978.8809	655.7388	3.7224	0.7498	486	3.665178586	0.008466563	29.57223405	0.068311861
22.74890904	×ÔÉí³µÁ¾	Road 1	93.77000979	68.31523361	-0.003475635	1.11456871	0.654901981	0	110.7515	978.8906	655.7389	3.7175	0.7537	487	2.630052489	0.006075421	29.61615768	0.068413324
22.76555655	×ÔÉí³µÁ¾	Road 1	94.08614709	68.3642189	-0.003273803	1.076113343	0.631372571	0	111.0171	978.8994	655.739	3.7135	0.7577	488	2.569532745	0.005935621	29.65893401	0.068512138
22.7821905	×ÔÉí³µÁ¾	Road 1	94.4023496	68.43407135	-0.003054813	1.018694282	0.592156887	0	111.4159	978.9141	655.7391	3.7061	0.7651	489	3.314539986	0.007656587	29.71406791	0.068639497
22.79888127	×ÔÉí³µÁ¾	Road 1	94.71983657	68.47816086	-0.002851333	0.979315341	0.576470613	0	111.6819	978.9238	655.7391	3.7012	0.769	490	2.395338877	0.005533233	29.75404795	0.068731851
22.81633484	×ÔÉí³µÁ¾	Road 1	95.05213623	68.54063187	-0.002648323	0.920864403	0.545098066	0	112.0813	978.9375	655.7393	3.6948	0.7755	491	2.952222725	0.006819634	29.80557478	0.068850878
22.83218876	×ÔÉí³µÁ¾	Road 1	95.35415164	68.579599	-0.002422011	0.872611403	0.521568656	0	112.3478	978.9473	655.7393	3.6898	0.7804	492	2.289681782	0.005289165	29.84187522	0.068934732
22.84895431	×ÔÉí³µÁ¾	Road 1	95.6737026	68.61592941	-0.002218305	0.818675399	0.505882382	0	112.6144	978.957	655.7394	3.6839	0.7843	493	2.118302312	0.004893278	29.87738971	0.06901677
22.86552668	×ÔÉí³µÁ¾	Road 1	95.98980069	68.66568375	-0.002033692	0.749563277	0.490196079	0	113.0145	978.9707	655.7395	3.6775	0.7907	494	2.614975265	0.006040593	29.92072605	0.069116877
22.88229589	×ÔÉí³µÁ¾	Road 1	96.30979609	68.69634247	-0.001822486	0.716145217	0.474509805	0	113.2815	978.9805	655.7396	3.6726	0.7956	495	1.919458291	0.004433949	29.95291385	0.069191231
22.89895293	×ÔÉí³µÁ¾	Road 1	96.62778578	68.72544937	-0.00165061	0.686896324	0.458823532	0	113.5485	978.9902	655.7396	3.6677	0.7996	496	1.872147331	0.00432466	29.98409829	0.069263267
22.91556526	×ÔÉí³µÁ¾	Road 1	96.94511104	68.76646957	-0.001483931	0.646435142	0.450980395	0	113.9493	979.0049	655.7397	3.6603	0.8069	497	2.301841789	0.005317255	30.02233723	0.069351599
22.93219774	×ÔÉí³µÁ¾	Road 1	97.2629402	68.79218445	-0.001307953	0.621967852	0.435294122	0	114.2166	979.0146	655.7399	3.6554	0.8118	498	1.754013692	0.004051772	30.05151084	0.06941899
22.94943724	×ÔÉí³µÁ¾	Road 1	97.59254355	68.82867279	-0.001166645	0.59034884	0.419607848	0	114.6177	979.0283	655.74	3.649	0.8182	499	2.093960107	0.004837048	30.08760967	0.069502378
22.965521	×ÔÉí³µÁ¾	Road 1	97.90019897	68.8620163	-0.001030285	1.14960587	0.403921574	0	114.8853	979.0381	655.7401	3.6441	0.8221	500	2.069014993	0.004779425	30.12088719	0.069579249
22.98220553	×ÔÉí³µÁ¾	Road 1	98.21974933	68.94895248	-0.000896448	2.157416821	0.388235301	0	115.1722	979.0488	655.7401	3.6386	0.8277	501	3.939065914	0.009099242	30.18660868	0.069731066
22.99892746	×ÔÉí³µÁ¾	Road 1	98.5407202	69.10060501	-0.000785597	1.992437124	0.380392164	0	115.5554	979.0625	655.7402	3.6319	0.8344	502	6.247251821	0.014431152	30.29107475	0.069972383
23.01562006	×ÔÉí³µÁ¾	Road 1	98.86146159	69.17250366	-0.000686418	1.150200605	0.356862754	0	115.8242	979.0723	655.7403	3.627	0.8393	503	3.411468793	0.007880493	30.34802104	0.070103929
23.03228627	×ÔÉí³µÁ¾	Road 1	99.18185953	69.20785904	-0.000581809	0.654797435	0.333333343	0	116.0931	979.082	655.7404	3.6221	0.8441	504	2.106741533	0.004866573	30.38313243	0.070185036
23.04884544	×ÔÉí³µÁ¾	Road 1	99.50044098	69.26029129	-0.000497548	1.085594654	0.309803933	0	116.4967	979.0967	655.7405	3.6148	0.8515	505	2.733183032	0.006313653	30.42839169	0.070289585
23.06555747	×ÔÉí³µÁ¾	Road 1	99.822242	69.32035217	-0.000423906	1.28799665	0.294117659	0	116.7852	979.1074	655.7406	3.6093	0.857	506	2.991187468	0.006909643	30.4783805	0.070405059
23.08222881	×ÔÉí³µÁ¾	Road 1	100.1435064	69.3736496	-0.000350581	1.034755349	0.270588249	0	117.0547	979.1172	655.7407	3.6045	0.8618	507	2.755488594	0.006365179	30.52431818	0.070511175
23.09903944	×ÔÉí³µÁ¾	Road 1	100.4676729	69.42033463	-0.000292246	0.537503779	0.262745112	0	117.4593	979.1318	655.7408	3.5972	0.8681	508	2.505446002	0.00578758	30.56643631	0.070608468
23.11553043	×ÔÉí³µÁ¾	Road 1	100.7857678	69.44041901	-0.000243259	0.551982343	0.239215687	0	117.7291	979.1416	655.7408	3.5923	0.873	509	1.570851104	0.003628666	30.59234121	0.070668308
23.13227875	×ÔÉí³µÁ¾	Road 1	101.1089554	69.46819382	-0.000198515	0.703496039	0.215686277	0	118.0183	979.1514	655.7409	3.5878	0.8775	510	1.835695566	0.004240457	30.62308602	0.070739329
23.14885589	×ÔÉí³µÁ¾	Road 1	101.429034	69.51038132	-0.000164798	0.589834988	0.20784314	0	118.4234	979.167	655.741	3.5795	0.8858	511	2.368924245	0.005472215	30.662356	0.070830042
23.16556755	×ÔÉí³µÁ¾	Road 1	101.7517973	69.52916794	-0.000135616	0.37514028	0.184313729	0	118.7129	979.1768	655.7411	3.575	0.8903	512	1.516165883	0.003502343	30.68769365	0.070888572
23.18220553	×ÔÉí³µÁ¾	Road 1	102.0731825	69.53887024	-0.000108633	0.28718254	0.168627456	0	118.9831	979.1865	655.7412	3.5702	0.8951	513	1.191274265	0.002751844	30.70751405	0.070934357
23.19899637	×ÔÉí³µÁ¾	Road 1	102.3975847	69.55269928	-8.82E-05	0.332635522	0.160784319	0	119.3885	979.2012	655.7413	3.5629	0.9024	514	1.335963528	0.003086076	30.729946	0.070986175
23.21555701	×ÔÉí³µÁ¾	Road 1	102.7175881	69.56325989	-7.14E-05	0.32071811	0.152941182	0	119.6589	979.2109	655.7414	3.558	0.9073	515	1.224376663	0.00282831	30.75022246	0.071033014
23.23219939	×ÔÉí³µÁ¾	Road 1	103.0392199	69.57384796	-5.62E-05	0.206393227	0.145098045	0	120.0644	979.2256	655.7415	3.5507	0.9146	516	1.223626423	0.002826577	30.77058652	0.071080055
23.24893121	×ÔÉí³µÁ¾	Road 1	103.3625933	69.57664261	-4.52E-05	0.177816167	0.137254909	0	120.3348	979.2363	655.7416	3.5449	0.9204	517	0.941578904	0.002175047	30.78634085	0.071116447
23.26556077	×ÔÉí³µÁ¾	Road 1	103.6839992	69.57862015	-3.59E-05	0.16637072	0.121568628	0	120.6052	979.2461	655.7416	3.5401	0.9252	518	0.912670523	0.002108269	30.80151815	0.071151507
23.29898299	×ÔÉí³µÁ¾	Road 1	104.3299952	69.58201218	-2.78E-05	0.095286123	0.113725491	0	121.3392	979.2725	655.7419	3.527	0.9383	519	0.902220652	0.00208413	30.83167237	0.071221163
23.31567596	×ÔÉí³µÁ¾	Road 1	104.6526309	69.57951279	-2.20E-05	0.059724629	0.113725491	0	121.6096	979.2822	655.7419	3.5222	0.9431	520	0.841173988	0.001943112	30.84571406	0.071253599
23.33220581	×ÔÉí³µÁ¾	Road 1	104.972098	69.57605209	-1.44E-05	0.054150678	0.105882354	0	121.88	979.292	655.742	3.5173	0.948	521	0.841147072	0.00194305	30.8596181	0.071285718
23.34885479	×ÔÉí³µÁ¾	Road 1	105.2938442	69.57101212	-1.23E-05	0.055262126	0.105882354	0	122.2856	979.3066	655.7421	3.51	0.9553	522	0.841107872	0.001942959	30.87362169	0.071318066
23.3661533	×ÔÉí³µÁ¾	Road 1	105.628123	69.56685104	-1.07E-05	0.036499798	0.105882354	0	122.5753	979.3174	655.7422	3.5046	0.9607	523	0.841075508	0.001942884	30.88817105	0.071351675
23.38223192	×ÔÉí³µÁ¾	Road 1	105.9388062	69.56192093	-9.48E-06	0.01698688	0.105882354	0	122.8456	979.3271	655.7423	3.4997	0.9656	524	0.841037163	0.001942796	30.90169376	0.071382913
23.3989007	×ÔÉí³µÁ¾	Road 1	106.2608668	69.55630417	-9.00E-06	0.009426496	0.105882354	0	123.116	979.3369	655.7424	3.4949	0.9704	525	0.840993477	0.001942695	30.91571209	0.071415295
23.41555518	×ÔÉí³µÁ¾	Road 1	106.5826118	69.5477623	-8.84E-06	0.010917329	0.105882354	0	123.5214	979.3516	655.7425	3.4876	0.9777	526	0.84092704	0.001942541	30.92971729	0.071447647
23.43221479	×ÔÉí³µÁ¾	Road 1	106.9044154	69.53902817	-8.72E-06	0.002691857	0.105882354	0	123.9268	979.3662	655.7426	3.4803	0.985	527	0.840859108	0.001942385	30.94372568	0.071480006
23.44890592	×ÔÉí³µÁ¾	Road 1	107.2267986	69.53269043	-8.72E-06	-0.00677425	0.113725491	0	124.1971	979.376	655.7427	3.4754	0.9899	528	0.840809814	0.001942271	30.95775975	0.071512425
23.46549075	×ÔÉí³µÁ¾	Road 1	107.547098	69.52603683	-8.72E-06	-0.009175935	0.113725491	0	124.4673	979.3857	655.7427	3.4706	0.9948	529	0.840758064	0.001942151	30.97170358	0.071544635
23.48221708	×ÔÉí³µÁ¾	Road 1	107.8700988	69.51934891	-8.72E-06	-0.008615579	0.113725491	0	124.7375	979.3955	655.7428	3.4657	0.9997	530	0.840706047	0.001942031	30.9857655	0.071577118
23.49889062	×ÔÉí³µÁ¾	Road 1	108.1920301	69.50848618	-8.72E-06	-0.009111176	0.121568628	0	125.1813	979.4121	655.743	3.4572	1.0082	531	0.840621559	0.001941836	30.99978164	0.071609496
23.51556416	×ÔÉí³µÁ¾	Road 1	108.51393	69.50172272	-8.72E-06	-0.012943733	0.121568628	0	125.4514	979.4219	655.743	3.4523	1.0131	532	0.840568954	0.001941714	31.0137969	0.071641871
23.53215156	×ÔÉí³µÁ¾	Road 1	108.8341351	69.4948288	-8.72E-06	-0.014394956	0.121568628	0	125.7215	979.4316	655.7431	3.4475	1.018	533	0.840515335	0.00194159	31.02773886	0.071674077
23.54883206	×ÔÉí³µÁ¾	Road 1	109.1561031	69.48739929	-8.72E-06	-0.014169181	0.121568628	0	126.0108	979.4414	655.7432	3.443	1.0226	534	0.84045755	0.001941457	31.04175812	0.071706461
23.5655067	×ÔÉí³µÁ¾	Road 1	109.4779056	69.47610397	-8.72E-06	-0.012918189	0.121568628	0	126.4545	979.458	655.7433	3.4344	1.0311	535	0.840369698	0.001941254	31.05577098	0.071738831
23.58227884	×ÔÉí³µÁ¾	Road 1	109.8015577	69.46921005	-8.72E-06	-0.01464479	0.121568628	0	126.7245	979.4678	655.7434	3.4296	1.036	536	0.840316078	0.00194113	31.06986488	0.071771388
23.59888897	×ÔÉí³µÁ¾	Road 1	110.1220512	69.46223373	-8.57E-06	-0.016076025	0.121568628	0	126.9944	979.4775	655.7435	3.4247	1.0409	537	0.840261818	0.001941005	31.08382173	0.071803628
23.6154903	×ÔÉí³µÁ¾	Road 1	110.4423263	69.45119247	-8.12E-06	-0.015855808	0.121568628	0	127.3029	979.4883	655.7435	3.4196	1.0461	538	0.84017984	0.001940815	31.09776984	0.071835848
23.63224594	×ÔÉí³µÁ¾	Road 1	110.7655412	69.44368057	-7.47E-06	-0.015850252	0.121568628	0	127.7078	979.5039	655.7437	3.4113	1.0544	539	0.840117516	0.001940671	31.11184655	0.071868366
23.64897154	×ÔÉí³µÁ¾	Road 1	111.0881416	69.4361824	-6.79E-06	-0.015845813	0.113725491	0	127.9969	979.5137	655.7438	3.4068	1.0589	540	0.840059196	0.001940537	31.12589704	0.071900822
23.66549332	×ÔÉí³µÁ¾	Road 1	111.4067621	69.42555313	-5.94E-06	-0.018852267	0.113725491	0	128.4017	979.5283	655.7439	3.3995	1.0663	541	0.839976524	0.001940346	31.13977495	0.07193288
23.69887559	×ÔÉí³µÁ¾	Road 1	112.0504015	69.41114731	-4.98E-06	-0.020308681	0.113725491	0	128.9412	979.5479	655.744	3.3898	1.076	542	0.839864479	0.001940087	31.16781153	0.071997645
23.7166411	×ÔÉí³µÁ¾	Road 1	112.3928797	69.39973526	-4.08E-06	-0.0220745	0.105882354	0	129.3651	979.5635	655.7441	3.3818	1.084	543	0.839775719	0.001939882	31.18273057	0.072032108
23.73217318	×ÔÉí³µÁ¾	Road 1	112.6922707	69.39233322	-2.35E-06	-0.025341898	0.090196081	0	129.6348	979.5732	655.7442	3.377	1.0889	544	0.839718147	0.001939749	31.19577315	0.072062236
23.75041045	×ÔÉí³µÁ¾	Road 1	113.0437474	69.38079071	-1.59E-06	-0.033912312	0.074509807	0	130.0393	979.5879	655.7443	3.3697	1.0962	545	0.839628372	0.001939542	31.21108567	0.072097608
23.76811328	×ÔÉí³µÁ¾	Road 1	113.3848842	69.37266083	-1.12E-06	-0.041652571	0.05882353	0	130.3089	979.5977	655.7444	3.3648	1.1011	546	0.83956514	0.001939395	31.22594835	0.072131941
23.78431909	×ÔÉí³µÁ¾	Road 1	113.6971149	69.35971069	-6.14E-07	-0.054390877	0.043137256	0	130.7133	979.6123	655.7445	3.3574	1.1085	547	0.839464417	0.001939163	31.23955256	0.072163366
23.80046296	×ÔÉí³µÁ¾	Road 1	114.0081111	69.35057831	-2.65E-07	-0.061465655	0.027450981	0	130.9828	979.6221	655.7446	3.3525	1.1134	548	0.839393387	0.001938999	31.25310361	0.072194669
23.81615046	×ÔÉí³µÁ¾	Road 1	114.3102744	69.34104767	-9.12E-08	-0.06982585	0.011764706	0	131.2523	979.6318	655.7447	3.3476	1.1183	549	0.83931926	0.001938827	31.26627043	0.072225085
23.83218803	×ÔÉí³µÁ¾	Road 1	114.6191361	69.33109818	-9.96E-09	-0.078406639	0	0	131.5218	979.6416	655.7448	3.3427	1.1232	550	0.839241875	0.001938649	31.27972983	0.072256176
23.84881758	×ÔÉí³µÁ¾	Road 1	114.9393259	69.31536026	-4.73E-12	-0.089738868	0	0	131.9259	979.6563	655.7449	3.3354	1.1305	551	0.839119469	0.001938366	31.29368401	0.07228841
23.8655483	×ÔÉí³µÁ¾	Road 1	115.2614093	69.30365295	6.94E-09	-0.096268468	0	0	132.2145	979.667	655.7449	3.3299	1.136	552	0.839028412	0.001938156	31.30772156	0.072320837
23.88279697	×ÔÉí³µÁ¾	Road 1	115.5933887	69.28801117	8.22E-08	-0.134933829	0	0.011764706	132.4838	979.6768	655.745	3.325	1.1409	553	0.838906754	0.001937875	31.32219159	0.072354263
23.89885579	×ÔÉí³µÁ¾	Road 1	115.9023736	69.26694489	2.69E-07	-0.261196554	0	0.011764706	132.8876	979.6914	655.7451	3.3176	1.1483	554	0.838742905	0.001937496	31.33566081	0.072385376
23.91549561	×ÔÉí³µÁ¾	Road 1	116.2224472	69.24744415	6.75E-07	-0.251940668	0	0.011764706	133.1568	979.7012	655.7452	3.3127	1.1532	555	0.838591232	0.001937146	31.34961481	0.07241761
23.93217282	×ÔÉí³µÁ¾	Road 1	116.5431246	69.22256699	1.32E-06	-0.169656694	0	0.011764706	133.5604	979.7158	655.7454	3.3054	1.1605	556	0.838397743	0.001936699	31.36359695	0.072449909
23.94881886	×ÔÉí³µÁ¾	Road 1	116.8631355	69.20795517	2.19E-06	-0.174384549	0	0.011764706	133.8294	979.7256	655.7454	3.3005	1.1654	557	0.838284096	0.001936436	31.37755106	0.072482143
23.96547738	×ÔÉí³µÁ¾	Road 1	117.1833113	69.19184647	3.35E-06	-0.217377692	0	0.011764706	134.0983	979.7354	655.7455	3.2956	1.1703	558	0.838158806	0.001936147	31.39151354	0.072514396
23.98221799	×ÔÉí³µÁ¾	Road 1	117.5049387	69.16460724	5.06E-06	-0.238877013	0	0.011764706	134.5016	979.75	655.7456	3.2882	1.1776	559	0.837946945	0.001935657	31.40554129	0.0725468
23.99883362	×ÔÉí³µÁ¾	Road 1	117.824078	69.14586868	6.76E-06	-0.20866698	0	0.011764706	134.7896	979.7607	655.7457	3.2827	1.1831	560	0.837801201	0.001935321	31.41946188	0.072578957
24.01551449	×ÔÉí³µÁ¾	Road 1	118.1443958	69.12971878	8.68E-06	-0.192396283	0	0.011764706	135.0582	979.7705	655.7457	3.2778	1.188	561	0.837675591	0.001935031	31.43343504	0.072611235
24.03223715	×ÔÉí³µÁ¾	Road 1	118.4653963	69.10396957	1.11E-05	-0.217487976	0	0.011764706	135.4803	979.7852	655.7458	3.2707	1.195	562	0.837475319	0.001934568	31.44743985	0.072643586
24.04898766	×ÔÉí³µÁ¾	Road 1	118.7868499	69.08639145	1.38E-05	-0.229906127	0	0.011764706	135.7489	979.7949	655.746	3.2658	1.1999	563	0.8373386	0.001934252	31.46146571	0.072675986
24.06550358	×ÔÉí³µÁ¾	Road 1	119.1037203	69.06873093	1.68E-05	-0.22243607	0	0.011764706	136.0173	979.8047	655.746	3.2609	1.2048	564	0.837201241	0.001933935	31.47529286	0.072707926
24.08215036	×ÔÉí³µÁ¾	Road 1	119.4229792	69.04228134	2.05E-05	-0.207346037	0	0.011764706	136.439	979.8203	655.7462	3.2529	1.2127	565	0.836995522	0.00193346	31.48922614	0.072740112
24.09888805	×ÔÉí³µÁ¾	Road 1	119.7439043	69.02569199	2.48E-05	-0.209862828	0	0.011764706	136.7073	979.8301	655.7462	3.248	1.2176	566	0.836866493	0.001933162	31.50323335	0.072772469
24.11546739	×ÔÉí³µÁ¾	Road 1	120.0617147	69.00864258	2.99E-05	-0.219614297	0	0.011764706	136.9756	979.8398	655.7463	3.2431	1.2225	567	0.836733887	0.001932855	31.51710584	0.072804514
24.13228718	×ÔÉí³µÁ¾	Road 1	120.3840129	68.98261871	3.64E-05	-0.219113901	0	0.011764706	137.3778	979.8545	655.7464	3.2357	1.2299	568	0.836531479	0.001932388	31.53117613	0.072837017
24.14888228	×ÔÉí³µÁ¾	Road 1	120.7019269	68.9655899	4.36E-05	-0.211758941	0	0.011764706	137.6458	979.8643	655.7465	3.2308	1.2347	569	0.836399033	0.001932082	31.54505625	0.07286908
24.16547041	×ÔÉí³µÁ¾	Road 1	121.0196302	68.94880829	5.23E-05	-0.209367618	0	0.011764706	137.9138	979.874	655.7466	3.2258	1.2396	570	0.836268509	0.00193178	31.55892838	0.072901125
24.18214835	×ÔÉí³µÁ¾	Road 1	121.338936	68.92342987	6.47E-05	-0.21626696	0	0.011764706	138.3157	979.8887	655.7467	3.2185	1.247	571	0.836071121	0.001931324	31.57287232	0.072933335
24.2001052	×ÔÉí³µÁ¾	Road 1	121.6826048	68.89890976	7.74E-05	-0.217212617	0	0.011764706	138.6982	979.9023	655.7468	3.2117	1.2537	572	0.835880409	0.001930884	31.5878821	0.072968008
24.21601007	×ÔÉí³µÁ¾	Road 1	121.9869262	68.88186722	9.13E-05	-0.214055523	0	0.011764706	138.966	979.9121	655.7469	3.2068	1.2586	573	0.835747856	0.001930578	31.60117457	0.072998713
24.23253076	×ÔÉí³µÁ¾	Road 1	122.3029531	68.86497574	0.000108217	-0.21135366	0	0.011764706	139.2336	979.9219	655.7469	3.2018	1.2635	574	0.835616478	0.001930274	31.61497952	0.073030603
24.249212	×ÔÉí³µÁ¾	Road 1	122.6219334	68.83956299	0.000124571	-0.215091109	0	0.011764706	139.635	979.9365	655.7471	3.1945	1.2709	575	0.835418823	0.001929817	31.62891534	0.073062794
24.26800863	×ÔÉí³µÁ¾	Road 1	122.9812753	68.82248611	0.000143497	-0.216442034	0	0.011764706	139.9025	979.9463	655.7471	3.1895	1.2758	576	0.835286003	0.001929511	31.64461591	0.073099063
24.28266391	×ÔÉí³µÁ¾	Road 1	123.2613759	68.80538177	0.000160434	-0.216077089	0	0.011764706	140.1699	979.9561	655.7472	3.1846	1.2807	577	0.835152969	0.001929203	31.65685531	0.073127336
24.29887779	×ÔÉí³µÁ¾	Road 1	123.5711887	68.78835297	0.000179235	-0.214774996	0	0.011764706	140.4373	979.9648	655.7473	3.1807	1.2846	578	0.835020523	0.001928897	31.67039423	0.073158611
24.31546995	×ÔÉí³µÁ¾	Road 1	123.8881007	68.76037216	0.000193572	-0.216106594	0	0.011764706	140.8764	979.9814	655.7474	3.1721	1.2932	579	0.834802895	0.001928395	31.68424542	0.073190607
24.33307674	×ÔÉí³µÁ¾	Road 1	124.2243085	68.74324722	0.000207688	-0.2173886	0	0.011764706	141.1436	979.9912	655.7475	3.1672	1.2981	580	0.834669701	0.001928087	31.69894127	0.073224554
24.34893653	×ÔÉí³µÁ¾	Road 1	124.527081	68.72608109	0.000219796	-0.21789977	0	0.011764706	141.4107	980.001	655.7476	3.1623	1.3031	581	0.834536186	0.001927779	31.71217684	0.073255128
24.36552796	×ÔÉí³µÁ¾	Road 1	124.8436966	68.69908905	0.000234448	-0.218500093	0	0.011764706	141.8304	980.0156	655.7477	3.1553	1.3101	582	0.834326248	0.001927294	31.7260195	0.073287105
24.38217511	×ÔÉí³µÁ¾	Road 1	125.1612959	68.68188171	0.000245406	-0.219090432	0	0.011764706	142.0973	980.0254	655.7477	3.1504	1.315	583	0.834192413	0.001926984	31.73990643	0.073319184
24.39884645	×ÔÉí³µÁ¾	Road 1	125.4792654	68.66216812	0.000255223	-0.220195964	0	0.011764706	142.3642	980.0352	655.7478	3.1455	1.3199	584	0.834039085	0.00192663	31.75381098	0.073351303
24.41554931	×ÔÉí³µÁ¾	Road 1	125.7977275	68.63872604	0.000264167	-0.220555782	0	0.011764706	142.7644	980.0498	655.7479	3.1382	1.3273	585	0.833856758	0.001926209	31.76773877	0.073383477
24.43222615	×ÔÉí³µÁ¾	Road 1	126.1156131	68.62141571	0.000273703	-0.220911086	0	0.011764706	143.0311	980.0596	655.748	3.1333	1.3322	586	0.833722122	0.001925898	31.78164262	0.073415594
24.44880732	×ÔÉí³µÁ¾	Road 1	126.4315896	68.60284882	0.00028307	-0.221331522	0	0.011764706	143.3168	980.0693	655.7481	3.1287	1.3368	587	0.833577713	0.001925565	31.79546431	0.073447523
24.46552594	×ÔÉí³µÁ¾	Road 1	126.7500589	68.57557526	0.000291038	-0.222582147	0	0.011764706	143.7357	980.085	655.7482	3.1207	1.3448	588	0.833365585	0.001925075	31.80939704	0.073479707
24.48228086	×ÔÉí³µÁ¾	Road 1	127.0691384	68.55818253	0.000299974	-0.222686902	0	0.011764706	144.0022	980.0947	655.7483	3.1158	1.3497	589	0.833230309	0.001924762	31.82335775	0.073511956
24.49884187	×ÔÉí³µÁ¾	Road 1	127.3844451	68.5407486	0.000311188	-0.223347485	0	0.011764706	144.2686	980.1045	655.7484	3.1109	1.3547	590	0.833094711	0.001924449	31.83715463	0.073543827
24.51548608	×ÔÉí³µÁ¾	Road 1	127.701215	68.51460114	0.000321817	-0.223486707	0	0.011764706	144.668	980.1191	655.7485	3.1035	1.3621	591	0.832891342	0.001923979	31.85101745	0.07357585
24.53215779	×ÔÉí³µÁ¾	Road 1	128.0184273	68.49713974	0.000333566	-0.224097326	0	0.011764706	144.9343	980.1279	655.7485	3.0996	1.3661	592	0.832755531	0.001923665	31.86490091	0.073607921
24.54886248	×ÔÉí³µÁ¾	Road 1	128.3361455	68.47088928	0.000345597	-0.225748375	0	0.011764706	145.3335	980.1426	655.7487	3.0922	1.3735	593	0.832551361	0.001923194	31.87880843	0.073640047
24.58342946	×ÔÉí³µÁ¾	Road 1	128.9931777	68.42704697	0.000355152	-0.225403205	0	0.011764706	145.9985	980.167	655.7488	3.0799	1.3859	594	0.832210365	0.001922406	31.90757543	0.073706499
24.60217368	×ÔÉí³µÁ¾	Road 1	129.3493607	68.40823975	0.000363948	-0.226054475	0	0.011764706	146.2264	980.1748	655.7489	3.0763	1.3896	595	0.832064087	0.001922068	31.92317181	0.073742527
24.61771126	×ÔÉí³µÁ¾	Road 1	129.6445128	68.38562851	0.000370993	-0.226164058	0	0.011764706	146.6252	980.1895	655.749	3.0689	1.397	596	0.831888222	0.001921662	31.93609735	0.073772385
24.63228333	×ÔÉí³µÁ¾	Road 1	129.9212528	68.36802979	0.000370993	-0.226794332	0	0.011764706	146.8909	980.1992	655.7491	3.064	1.402	597	0.831751343	0.001921346	31.94821769	0.073800383
24.64881355	×ÔÉí³µÁ¾	Road 1	130.2350935	68.34918137	0.000370993	-0.226734325	0	0.011764706	147.1755	980.209	655.7491	3.0594	1.4066	598	0.831604744	0.001921007	31.96196429	0.073832138
24.66548599	×ÔÉí³µÁ¾	Road 1	130.5515471	68.33029861	0.000370993	-0.227324605	0	0.011764706	147.4601	980.2197	655.7493	3.0538	1.4122	599	0.831457878	0.001920668	31.97582673	0.07386416
24.68213314	×ÔÉí³µÁ¾	Road 1	130.8673982	68.30384903	0.000370521	-0.227063701	0	0.011764706	147.8584	980.2344	655.7494	3.0464	1.4196	600	0.831252159	0.001920192	31.9896647	0.073896125
24.6988547	×ÔÉí³µÁ¾	Road 1	131.1845793	68.28620911	0.000364882	-0.227614015	0	0.011764706	148.1238	980.2441	655.7495	3.0415	1.4246	601	0.83111496	0.001919876	32.00356224	0.073928229
24.71550074	×ÔÉí³µÁ¾	Road 1	131.5002464	68.26854858	0.000357453	-0.228004426	0	0.011764706	148.3891	980.2529	655.7495	3.0375	1.4286	602	0.8309776	0.001919558	32.01739473	0.073960182
24.73212956	×ÔÉí³µÁ¾	Road 1	131.8154644	68.24204407	0.00034831	-0.228349298	0	0.011764706	148.787	980.2676	655.7496	3.0301	1.4361	603	0.830771454	0.001919082	32.03120948	0.073992094
24.74882693	×ÔÉí³µÁ¾	Road 1	132.131888	68.22184296	0.000338433	-0.228083163	0	0.011764706	149.0901	980.2783	655.7497	3.0246	1.4413	604	0.830614334	0.001918719	32.04507855	0.074024131
24.76546491	×ÔÉí³µÁ¾	Road 1	132.4470988	68.20291214	0.000329618	-0.228462622	0	0.011764706	149.3741	980.2891	655.7498	3.0189	1.4469	605	0.830467094	0.001918379	32.05889585	0.074056049
24.78216008	×ÔÉí³µÁ¾	Road 1	132.7632699	68.17637329	0.000319672	-0.229052931	0	0.011764706	149.7716	980.3037	655.7499	3.0114	1.4544	606	0.830260681	0.001917902	32.07275719	0.074088069
24.79880063	×ÔÉí³µÁ¾	Road 1	133.0783248	68.1586647	0.000311608	-0.228967264	0	0.011764706	150.0365	980.3125	655.75	3.0074	1.4584	607	0.830122948	0.001917584	32.08657089	0.074119979
24.81551852	×ÔÉí³µÁ¾	Road 1	133.3947619	68.14096985	0.000304924	-0.228446841	0	0.011764706	150.3014	980.3223	655.7501	3.0025	1.4633	608	0.829985321	0.001917266	32.1004465	0.074152031
24.83217667	×ÔÉí³µÁ¾	Road 1	133.7099862	68.12328873	0.000299563	-0.228856891	0	0.011764706	150.5662	980.332	655.7501	2.9975	1.4683	609	0.829847801	0.001916948	32.11427022	0.074183964
24.8488777	×ÔÉí³µÁ¾	Road 1	134.0259282	68.10306015	0.00029589	-0.228776902	0	0.011764706	150.8687	980.3428	655.7502	2.9923	1.4736	610	0.829690468	0.001916585	32.12812691	0.074215973
24.86546583	×ÔÉí³µÁ¾	Road 1	134.3395945	68.07268982	0.000292649	-0.229607388	0	0.011764706	151.3223	980.3594	655.7504	2.9839	1.482	611	0.829454254	0.001916039	32.14188601	0.074247757
24.88216759	×ÔÉí³µÁ¾	Road 1	134.6553274	68.0549881	0.000292246	-0.228617117	0	0.011764706	151.5868	980.3691	655.7504	2.979	1.487	612	0.829316574	0.001915721	32.15573706	0.074279753
24.89878065	×ÔÉí³µÁ¾	Road 1	134.9692958	68.03601608	0.000292246	-0.229447827	0	0.011764706	151.8701	980.3789	655.7505	2.9744	1.4916	613	0.829169014	0.00191538	32.16951209	0.074311573
24.91550844	×ÔÉí³µÁ¾	Road 1	135.285309	68.00943604	0.000292246	-0.228897393	0	0.011764706	152.2667	980.3936	655.7506	2.967	1.4991	614	0.82896228	0.001914903	32.1833788	0.074343605
24.93214862	×ÔÉí³µÁ¾	Road 1	135.5995853	67.99172058	0.000292246	-0.229297817	0	0.011764706	152.531	980.4023	655.7507	2.963	1.5041	615	0.828824493	0.001914585	32.19717059	0.074375464
24.9492415	×ÔÉí³µÁ¾	Road 1	135.9223035	67.96895828	0.000292246	-0.229437679	0	0.011764706	152.7952	980.4121	655.7507	2.958	1.5086	616	0.828647453	0.001914176	32.21133456	0.074408183
24.96546968	×ÔÉí³µÁ¾	Road 1	136.2285987	67.94744568	0.000292246	-0.228987187	0	0.011764706	153.1913	980.4268	655.7509	2.9506	1.5158	617	0.828480133	0.001913789	32.22477928	0.07443924
24.98217291	×ÔÉí³µÁ¾	Road 1	136.5437782	67.92973022	0.000292246	-0.229727745	0	0.011764706	153.4554	980.4365	655.7509	2.9456	1.5207	618	0.828342346	0.001913471	32.23861527	0.074471201
24.9987911	×ÔÉí³µÁ¾	Road 1	136.8572653	67.91074448	0.000292246	-0.229697347	0	0.011764706	153.7382	980.4463	655.751	2.941	1.5254	619	0.828194679	0.00191313	32.25237837	0.074502994
25.01549799	×ÔÉí³µÁ¾	Road 1	137.1723024	67.8841713	0.000292246	-0.230027437	0	0.011764706	154.134	980.4609	655.7511	2.9336	1.5328	620	0.827987999	0.001912652	32.26621148	0.074534949
25.03210152	×ÔÉí³µÁ¾	Road 1	137.4853205	67.8690033	0.000292246	-0.229116917	0	0.011764706	154.3601	980.4688	655.7512	2.9299	1.5365	621	0.827870026	0.00191238	32.27995704	0.074566701
25.04881282	×ÔÉí³µÁ¾	Road 1	137.8002821	67.85003128	0.000292246	-0.228856683	0	0.011764706	154.6427	980.4785	655.7513	2.9253	1.5412	622	0.827722466	0.001912039	32.29378935	0.074598653
25.0654497	×ÔÉí³µÁ¾	Road 1	138.1137068	67.82093124	0.000292246	-0.229156777	0	0.011764706	155.0758	980.4941	655.7514	2.9175	1.549	623	0.827496132	0.001911516	32.30755631	0.074630455
25.08217602	×ÔÉí³µÁ¾	Road 1	138.4287343	67.80324326	0.000292246	-0.228691369	0	0.011764706	155.3393	980.5039	655.7515	2.9126	1.554	624	0.827358559	0.001911198	32.32139498	0.074662422
25.09880741	×ÔÉí³µÁ¾	Road 1	138.7418918	67.78552094	0.00029144	-0.229456529	0	0.011764706	155.6028	980.5137	655.7515	2.9076	1.559	625	0.827220718	0.00191088	32.33515281	0.074694203
25.11550881	×ÔÉí³µÁ¾	Road 1	139.0562329	67.7564621	0.00029144	-0.228807107	0	0.011764706	156.0355	980.5293	655.7516	2.8999	1.5668	626	0.826994705	0.001910358	32.34896477	0.074726109
25.13290263	×ÔÉí³µÁ¾	Road 1	139.3835145	67.73749008	0.00029144	-0.229076728	0	0.011764706	156.3176	980.5391	655.7517	2.8952	1.5714	627	0.826847145	0.001910017	32.36334681	0.074759331
25.14877304	×ÔÉí³µÁ¾	Road 1	139.6820538	67.71982269	0.00029144	-0.228866845	0	0.011764706	156.5808	980.5488	655.7518	2.8903	1.5764	628	0.826709732	0.001909699	32.37646703	0.074789639
25.16553456	×ÔÉí³µÁ¾	Road 1	139.9972321	67.69327011	0.00029144	-0.228926629	0	0.011764706	156.9755	980.5625	655.7519	2.8838	1.583	629	0.826503212	0.001909222	32.39032048	0.07482164
25.18213112	×ÔÉí³µÁ¾	Road 1	140.3092272	67.67560959	0.00029144	-0.22871691	0	0.011764706	157.2385	980.5723	655.752	2.8788	1.588	630	0.826365852	0.001908905	32.40403531	0.074853322
25.19878303	×ÔÉí³µÁ¾	Road 1	140.6221752	67.65665131	0.00029144	-0.229007065	0	0.011764706	157.5203	980.582	655.7521	2.8742	1.5927	631	0.826218399	0.001908565	32.41779343	0.074885103
25.21544704	×ÔÉí³µÁ¾	Road 1	140.9352628	67.63771362	0.00029144	-0.228146538	0	0.011764706	157.802	980.5928	655.7521	2.8685	1.5983	632	0.826071106	0.001908224	32.43155908	0.074916901
25.23212095	×ÔÉí³µÁ¾	Road 1	141.2484078	67.60994568	0.00029144	-0.228843987	0	0.011764706	158.215	980.6074	655.7523	2.8614	1.6055	633	0.825855133	0.001907725	32.44532931	0.074948711
25.24877983	×ÔÉí³µÁ¾	Road 1	141.5611887	67.59227829	0.00029144	-0.228236586	0	0.011764706	158.4777	980.6172	655.7523	2.8564	1.6105	634	0.82571772	0.001907408	32.45908484	0.074980486
25.26559266	×ÔÉí³µÁ¾	Road 1	141.8767778	67.57462463	0.00029144	-0.229177907	0	0.011764706	158.7403	980.626	655.7524	2.8524	1.6145	635	0.825580414	0.001907091	32.47296519	0.07501255
25.28252609	×ÔÉí³µÁ¾	Road 1	142.1945001	67.54687042	0.00029144	-0.228517592	0	0.011764706	159.1529	980.6416	655.7526	2.8443	1.6227	636	0.825364548	0.001906592	32.48694144	0.075044835
25.29885176	×ÔÉí³µÁ¾	Road 1	142.500739	67.52921677	0.00029144	-0.229267806	0	0.011764706	159.4154	980.6504	655.7526	2.8402	1.6267	637	0.825227242	0.001906275	32.50041383	0.075075956
25.31552017	×ÔÉí³µÁ¾	Road 1	142.8133252	67.51155624	0.00029144	-0.227706999	0	0.011764706	159.6778	980.6602	655.7527	2.8352	1.6317	638	0.825089882	0.001905958	32.51416677	0.075107725
25.33215486	×ÔÉí³µÁ¾	Road 1	143.1251508	67.48383636	0.00029144	-0.228437215	0	0.011764706	160.09	980.6748	655.7528	2.828	1.6389	639	0.824874283	0.00190546	32.52788829	0.075139422
25.34885149	×ÔÉí³µÁ¾	Road 1	143.4380559	67.46618958	0.00029144	-0.227556705	0	0.011764706	160.3523	980.6846	655.7529	2.823	1.644	640	0.82473703	0.001905143	32.54165862	0.075171231
25.36549204	×ÔÉí³µÁ¾	Road 1	143.7498284	67.44855652	0.00029144	-0.228587449	0	0.011764706	160.6144	980.6934	655.7529	2.8189	1.648	641	0.824599884	0.001904826	32.55538042	0.075202929
25.38216814	×ÔÉí³µÁ¾	Road 1	144.0621504	67.42336349	0.00029144	-0.22763662	0	0.011764706	160.8952	980.7041	655.753	2.8132	1.6537	642	0.824403938	0.001904373	32.56912826	0.075234686
25.39877094	×ÔÉí³µÁ¾	Road 1	144.3730064	67.40322418	0.00029144	-0.228196949	0	0.011764706	161.2882	980.7178	655.7531	2.8067	1.6602	643	0.824247299	0.001904011	32.58281307	0.075266298
25.41544044	×ÔÉí³µÁ¾	Road 1	144.6850241	67.38432083	0.00029144	-0.227886781	0	0.011764706	161.5689	980.7275	655.7532	2.802	1.6649	644	0.824100273	0.001903672	32.59655042	0.075298031
25.43215174	×ÔÉí³µÁ¾	Road 1	144.9977013	67.35791245	0.00029144	-0.228286862	0	0.011764706	161.9616	980.7422	655.7533	2.7944	1.6725	645	0.823894875	0.001903197	32.61031877	0.075329836
25.44884361	×ÔÉí³µÁ¾	Road 1	145.3099332	67.34027939	0.00029144	-0.227736488	0	0.011764706	162.2234	980.752	655.7534	2.7894	1.6775	646	0.823757729	0.00190288	32.62406882	0.075361599
25.46542881	×ÔÉí³µÁ¾	Road 1	145.6200888	67.32268066	0.00029144	-0.227766454	0	0.011764706	162.485	980.7607	655.7534	2.7853	1.6815	647	0.82362085	0.001902564	32.63772874	0.075393153
25.48215403	×ÔÉí³µÁ¾	Road 1	145.9327344	67.29500885	0.00029144	-0.227341503	0	0.011764706	162.8961	980.7754	655.7535	2.7781	1.6887	648	0.823405624	0.001902067	32.65150038	0.075424966
25.49875719	×ÔÉí³µÁ¾	Road 1	146.2430171	67.27741699	0.00029144	-0.227371469	0	0.011764706	163.1576	980.7852	655.7537	2.7731	1.6937	649	0.823268799	0.001901751	32.66516925	0.075456541
25.51540251	×ÔÉí³µÁ¾	Road 1	146.5540063	67.25982513	0.00029144	-0.227266014	0	0.011764706	163.419	980.7949	655.7537	2.768	1.6988	650	0.823131973	0.001901435	32.67887054	0.075488191
25.53215009	×ÔÉí³µÁ¾	Road 1	146.8667892	67.23469391	0.00029144	-0.227446243	0	0.011764706	163.699	980.8047	655.7538	2.7633	1.7034	651	0.822936508	0.001900983	32.69265274	0.075520028
25.54889108	×ÔÉí³µÁ¾	Road 1	147.1793672	67.21711578	0.00029144	-0.226715624	0	0.011764706	164.0536	980.8174	655.7539	2.757	1.7097	652	0.822799789	0.001900668	32.70642722	0.075551847
25.56540846	×ÔÉí³µÁ¾	Road 1	147.4876493	67.19073486	0.00029144	-0.227040917	0	0.011764706	164.4454	980.8311	655.754	2.7505	1.7162	653	0.822594604	0.001900194	32.72001433	0.075583233
25.58213369	×ÔÉí³µÁ¾	Road 1	147.799723	67.17191391	0.00029144	-0.226565316	0	0.011764706	164.7251	980.8418	655.7541	2.7448	1.7219	654	0.822448219	0.001899855	32.73376996	0.075615009
25.59882775	×ÔÉí³µÁ¾	Road 1	148.1111338	67.15434265	0.00029144	-0.227325901	0	0.011764706	164.9862	980.8506	655.7542	2.7407	1.726	655	0.822311554	0.00189954	32.74749768	0.07564672
25.61542835	×ÔÉí³µÁ¾	Road 1	148.4206795	67.1279892	0.00029144	-0.226420566	0	0.011764706	165.3776	980.8652	655.7543	2.7331	1.7335	656	0.822106583	0.001899066	32.76114514	0.075678245
25.64877433	×ÔÉí³µÁ¾	Road 1	149.0421686	67.09536667	0.00029144	-0.226710722	0	0.011764706	165.8619	980.8818	655.7544	2.7253	1.7413	657	0.821852852	0.00189848	32.78855063	0.075741552
25.66540425	×ÔÉí³µÁ¾	Road 1	149.3519714	67.065271	0.00029144	-0.226225108	0	0.011764706	166.3089	980.8984	655.7545	2.7168	1.7498	658	0.821618774	0.001897939	32.80221408	0.075773115
25.68211371	×ÔÉí³µÁ¾	Road 1	149.6631746	67.04772034	0.00029144	-0.226790637	0	0.011764706	166.5695	980.9072	655.7546	2.7127	1.7538	659	0.821482269	0.001897624	32.81594061	0.075804823
25.69887632	×ÔÉí³µÁ¾	Road 1	149.9752859	67.03016968	0.00029144	-0.226735115	0	0.011764706	166.83	980.917	655.7546	2.7076	1.7589	660	0.821345764	0.001897309	32.82970851	0.075836627
25.71653516	×ÔÉí³µÁ¾	Road 1	150.3039494	67.00261459	0.00029144	-0.226650342	0	0.011764706	167.2393	980.9316	655.7548	2.7004	1.7661	661	0.821131447	0.001896814	32.84420874	0.075870122
25.73237296	×ÔÉí³µÁ¾	Road 1	150.5986426	66.98507767	0.00029589	-0.226588666	0	0.011764706	167.4996	980.9404	655.7548	2.6963	1.7701	662	0.820995049	0.001896499	32.85721149	0.075900159
25.74878991	×ÔÉí³µÁ¾	Road 1	150.9039924	66.95879974	0.000299974	-0.226257861	0	0.011764706	167.89	980.9551	655.7549	2.6887	1.7777	663	0.820790665	0.001896026	32.87068637	0.075931286
25.78214212	×ÔÉí³µÁ¾	Road 1	151.5239613	66.91873398	0.00030617	-0.22567755	0	0.011764706	168.4847	980.9766	655.7551	2.6779	1.7884	664	0.820479042	0.001895307	32.89805116	0.075994498
25.79881199	×ÔÉí³µÁ¾	Road 1	151.8337487	66.90121765	0.000312872	-0.226518065	0	0.011764706	168.7447	980.9854	655.7552	2.6739	1.7924	665	0.820342804	0.001894992	32.91172617	0.076026087
25.81542175	×ÔÉí³µÁ¾	Road 1	152.1423324	66.88245163	0.00032831	-0.226207882	0	0.011764706	169.0232	980.9951	655.7552	2.6692	1.7971	666	0.820196846	0.001894655	32.92534944	0.076057557
25.83208393	×ÔÉí³µÁ¾	Road 1	152.4517686	66.8562149	0.000336215	-0.22636731	0	0.011764706	169.4131	981.0098	655.7554	2.6616	1.8047	667	0.819992783	0.001894183	32.93901231	0.076089118
25.84877286	×ÔÉí³µÁ¾	Road 1	152.7616205	66.83871231	0.000344246	-0.225416452	0	0.011764706	169.6729	981.0186	655.7554	2.6575	1.8088	668	0.819856651	0.001893869	32.95269484	0.076120725
25.8654629	×ÔÉí³µÁ¾	Road 1	153.0713713	66.81248932	0.000352405	-0.225765795	0	0.011764706	170.0624	981.0322	655.7556	2.6509	1.8154	669	0.819652695	0.001893398	32.96637487	0.076152326
25.88210271	×ÔÉí³µÁ¾	Road 1	153.3801092	66.79499359	0.000361619	-0.225275725	0	0.011764706	170.322	981.042	655.7556	2.6459	1.8204	670	0.819516617	0.001893083	32.98001148	0.076183827
25.89876599	×ÔÉí³µÁ¾	Road 1	153.6892014	66.77751846	0.000370521	-0.225445926	0	0.011764706	170.5816	981.0518	655.7557	2.6408	1.8255	671	0.819380699	0.001892769	32.99366505	0.076215366
25.91539554	×ÔÉí³µÁ¾	Road 1	153.9975471	66.75130234	0.000379567	-0.225576565	0	0.011764706	170.9708	981.0654	655.7558	2.6342	1.8321	672	0.819176796	0.001892298	33.00728759	0.076246834
25.93211783	×ÔÉí³µÁ¾	Road 1	154.3075311	66.73383408	0.000391693	-0.225296333	0	0.011764706	171.2302	981.0742	655.7559	2.6302	1.8361	673	0.819040932	0.001891985	33.02098383	0.076278473
25.95114063	×ÔÉí³µÁ¾	Road 1	154.6600546	66.71387329	0.000404074	-0.225646347	0	0.011764706	171.5266	981.085	655.756	2.6248	1.8415	674	0.818885681	0.001891626	33.03656133	0.076314457
25.96596673	×ÔÉí³µÁ¾	Road 1	154.9347293	66.69514847	0.000418248	-0.224935681	0	0.011764706	171.8043	981.0947	655.756	2.6201	1.8462	675	0.818740044	0.00189129	33.04870005	0.076342497
25.98207394	×ÔÉí³µÁ¾	Road 1	155.2330213	66.66897354	0.000439066	-0.224845305	0	0.011764706	172.193	981.1094	655.7562	2.6125	1.8538	676	0.818536461	0.001890819	33.06188439	0.076372953
25.99878303	×ÔÉí³µÁ¾	Road 1	155.5423787	66.65152588	0.000455124	-0.225235716	0	0.011764706	172.4521	981.1182	655.7562	2.6084	1.8579	677	0.818400757	0.001890506	33.07555912	0.076404542
26.01539756	×ÔÉí³µÁ¾	Road 1	155.8499046	66.63407135	0.000479378	-0.224724516	0	0.011764706	172.7111	981.127	655.7563	2.6043	1.862	678	0.818264999	0.001890192	33.08915421	0.076435946
26.03213305	×ÔÉí³µÁ¾	Road 1	156.1595421	66.60666733	0.000509134	-0.224648818	0	0.011764706	173.118	981.1416	655.7563	2.5971	1.8693	679	0.818051857	0.0018897	33.1028447	0.076467571
26.04877359	×ÔÉí³µÁ¾	Road 1	156.4673425	66.5892334	0.000536462	-0.225017563	0	0.011764706	173.3768	981.1514	655.7565	2.592	1.8753	680	0.81791626	0.001889387	33.11645528	0.076499012
26.06547793	×ÔÉí³µÁ¾	Road 1	156.776236	66.57054977	0.000561629	-0.224527821	0	0.011764706	173.654	981.1611	655.7565	2.5873	1.8801	681	0.817770943	0.001889051	33.1301156	0.076530567
26.08217529	×ÔÉí³µÁ¾	Road 1	157.0848794	66.54440918	0.000590143	-0.224428624	0	0.011764706	174.042	981.1748	655.7567	2.5807	1.8868	682	0.817567627	0.001888581	33.14376682	0.076562101
26.09880851	×ÔÉí³µÁ¾	Road 1	157.3922566	66.52698212	0.000612976	-0.224388525	0	0.011764706	174.3006	981.1846	655.7567	2.5756	1.8918	683	0.817432083	0.001888268	33.15736335	0.076593509
26.11544246	×ÔÉí³µÁ¾	Road 1	157.6995669	66.50957565	0.000632336	-0.223918006	0	0.011764706	174.5591	981.1934	655.7568	2.5715	1.896	684	0.8172967	0.001887955	33.17095822	0.076624913
26.13206761	×ÔÉí³µÁ¾	Road 1	158.0065883	66.48220596	0.000656929	-0.22463806	0	0.011764706	174.9652	981.208	655.7569	2.5642	1.9033	685	0.817083824	0.001887464	33.18454237	0.076656293
26.14874702	×ÔÉí³µÁ¾	Road 1	158.3145308	66.46479263	0.000674378	-0.224006891	0	0.011764706	175.2236	981.2168	655.757	2.5601	1.9074	686	0.816948387	0.001887151	33.19816858	0.076687769
26.1653861	×ÔÉí³µÁ¾	Road 1	158.6216083	66.43869324	0.000688558	-0.224490315	0	0.011764706	175.6109	981.2305	655.7571	2.5535	1.9141	687	0.816745392	0.001886682	33.21175847	0.076719162
26.18213992	×ÔÉí³µÁ¾	Road 1	158.9307222	66.42129364	0.000701488	-0.223622099	0	0.011764706	175.8691	981.2402	655.7571	2.5484	1.9192	688	0.816610062	0.001886369	33.22543981	0.076750766
26.19875041	×ÔÉí³µÁ¾	Road 1	159.2371115	66.40390091	0.000708014	-0.224612728	0	0.011764706	176.1272	981.249	655.7572	2.5443	1.9233	689	0.816474785	0.001886057	33.23900186	0.076782094
26.21539976	×ÔÉí³µÁ¾	Road 1	159.5441313	66.38526535	0.000710198	-0.223422199	0	0.011764706	176.4037	981.2588	655.7573	2.5396	1.9281	690	0.816329842	0.001885722	33.25259321	0.07681349
26.23210592	×ÔÉí³µÁ¾	Road 1	159.8521125	66.36666412	0.000710198	-0.223441973	0	0.011764706	176.6801	981.2686	655.7573	2.5348	1.9328	691	0.816185165	0.001885388	33.26622854	0.076844988
26.24883664	×ÔÉí³µÁ¾	Road 1	160.1604252	66.34057159	0.000710198	-0.223761857	0	0.011764706	177.0669	981.2822	655.7574	2.5282	1.9395	692	0.815982224	0.001884919	33.27988051	0.076876524
26.26542331	×ÔÉí³µÁ¾	Road 1	160.4659633	66.314534	0.000710198	-0.223867834	0	0.011764706	177.4536	981.2959	655.7576	2.5216	1.9462	693	0.815779709	0.001884451	33.29341157	0.076907781
26.28212214	×ÔÉí³µÁ¾	Road 1	160.7734869	66.297155	0.000710198	-0.223617405	0	0.011764706	177.7112	981.3057	655.7576	2.5165	1.9513	694	0.815644539	0.001884139	33.30703189	0.076939244
26.29878322	×ÔÉí³µÁ¾	Road 1	161.0802292	66.27857437	0.00070656	-0.22395736	0	0.011764706	177.9873	981.3154	655.7577	2.5117	1.9561	695	0.815500023	0.001883805	33.32061899	0.07697063
26.3154377	×ÔÉí³µÁ¾	Road 1	161.3867697	66.26119537	0.000704384	-0.223046288	0	0.011764706	178.2448	981.3242	655.7578	2.5076	1.9602	696	0.815364853	0.001883493	33.33419847	0.077001998
26.33212553	×ÔÉí³µÁ¾	Road 1	161.693838	66.24262848	0.000701488	-0.22300607	0	0.011764706	178.5207	981.334	655.7579	2.5029	1.965	697	0.815220444	0.001883159	33.34780274	0.077033424
26.34874812	×ÔÉí³µÁ¾	Road 1	161.9996084	66.22152786	0.000701488	-0.224015579	0	0.011764706	178.8333	981.3457	655.7579	2.4968	1.9711	698	0.815056328	0.00188278	33.36135108	0.077064721
26.36547188	×ÔÉí³µÁ¾	Road 1	162.3071075	66.19306641	0.000700044	-0.223274693	0	0.011764706	179.256	981.3604	655.7581	2.4899	1.9781	699	0.814834961	0.001882269	33.37497818	0.0770962
26.38204645	×ÔÉí³µÁ¾	Road 1	162.6117835	66.17570801	0.000700044	-0.222774059	0	0.011764706	179.5132	981.3691	655.7581	2.4857	1.9822	700	0.814699951	0.001881957	33.38848148	0.077127392
26.39875188	×ÔÉí³µÁ¾	Road 1	162.9187848	66.15839767	0.000700044	-0.22230342	0	0.011764706	179.7704	981.3789	655.7582	2.4806	1.9873	701	0.814565315	0.001881646	33.40208915	0.077158826
26.41544338	×ÔÉí³µÁ¾	Road 1	163.2254037	66.13115158	0.000700044	-0.222867459	0	0.011764706	180.1743	981.3926	655.7583	2.4743	1.9937	702	0.814353401	0.001881156	33.41568193	0.077190225
26.43212132	×ÔÉí³µÁ¾	Road 1	163.5316933	66.11383438	0.000700044	-0.222807243	0	0.011764706	180.4313	981.4023	655.7584	2.4692	1.9988	703	0.814218712	0.001880845	33.42926142	0.077221594
26.46537712	×ÔÉí³µÁ¾	Road 1	164.1420918	66.07671432	0.000700044	-0.222886294	0	0.011764706	180.9817	981.4209	655.7585	2.4607	2.0084	704	0.81393	0.001880178	33.45632932	0.077284121
26.48211591	×ÔÉí³µÁ¾	Road 1	164.449194	66.0482872	0.000700044	-0.222345486	0	0.011764706	181.4035	981.4365	655.7587	2.4527	2.0164	705	0.8137089	0.001879668	33.46994982	0.077315584
26.49880924	×ÔÉí³µÁ¾	Road 1	164.7553821	66.03097	0.000700044	-0.223145425	0	0.011764706	181.6602	981.4453	655.7587	2.4486	2.0206	706	0.813574211	0.001879356	33.48353108	0.077346957
26.51539884	×ÔÉí³µÁ¾	Road 1	165.0595821	66.01245117	0.000700044	-0.221784055	0	0.011764706	181.9351	981.4551	655.7588	2.4438	2.0254	707	0.813430176	0.001879024	33.49702556	0.077378129
26.53204635	×ÔÉí³µÁ¾	Road 1	165.3647527	65.99268265	0.000700044	-0.222614497	0	0.011764706	182.1916	981.4639	655.7589	2.4397	2.0295	708	0.813276421	0.001878669	33.51056459	0.077409404
26.54874812	×ÔÉí³µÁ¾	Road 1	165.6708204	65.97169189	0.000700044	-0.221657634	0	0.011764706	182.5397	981.4766	655.7589	2.4333	2.0359	709	0.813113159	0.001878291	33.52414502	0.077440775
26.56539307	×ÔÉí³µÁ¾	Road 1	165.9757669	65.95440216	0.000700044	-0.222477555	0	0.011764706	182.796	981.4854	655.759	2.4292	2.0401	710	0.812978683	0.001877981	33.53767701	0.077472034
26.58211316	×ÔÉí³µÁ¾	Road 1	166.2819526	65.92478714	0.000700044	-0.22194244	0	0.011764706	183.2354	981.501	655.7592	2.4215	2.0477	711	0.812748344	0.001877449	33.55126623	0.077503425
26.59874711	×ÔÉí³µÁ¾	Road 1	166.586481	65.90749741	0.000700044	-0.221886247	0	0.011764706	183.4915	981.5098	655.7592	2.4174	2.0518	712	0.812613869	0.001877138	33.56478321	0.077534649
26.61543055	×ÔÉí³µÁ¾	Road 1	166.8917953	65.881604	0.000700044	-0.221801519	0	0.011764706	183.8757	981.5234	655.7593	2.4107	2.0585	713	0.812412476	0.001876673	33.57833704	0.077565959
26.648745	×ÔÉí³µÁ¾	Road 1	167.5012821	65.86186981	0.000700044	-0.22173512	0	0.011764706	184.1682	981.5332	655.7594	2.4063	2.063	714	0.812258987	0.001876318	33.60539701	0.077628467
26.6654376	×ÔÉí³µÁ¾	Road 1	167.8064897	65.82241516	0.000700044	-0.221209586	0	0.011764706	184.7531	981.5537	655.7595	2.3964	2.0729	715	0.811952118	0.001875609	33.6189506	0.077659776
26.68212654	×ÔÉí³µÁ¾	Road 1	168.1115446	65.80395126	0.000700044	-0.221499473	0	0.011764706	185.0272	981.5635	655.7596	2.3916	2.0776	716	0.81180851	0.001875278	33.63249882	0.077691072
26.69876489	×ÔÉí³µÁ¾	Road 1	168.4156008	65.78791809	0.000700044	-0.221943468	0	0.011764706	185.2646	981.5723	655.7596	2.3871	2.0821	717	0.811683807	0.00187499	33.6460039	0.077722269
26.71545053	×ÔÉí³µÁ¾	Road 1	168.7203957	65.76085052	0.000700044	-0.221398532	0	0.011764706	185.6664	981.5859	655.7598	2.3808	2.0885	718	0.811473282	0.001874503	33.65954385	0.077753546
26.73211343	×ÔÉí³µÁ¾	Road 1	169.0246957	65.74360199	0.000702211	-0.221347958	0	0.011764706	185.9219	981.5947	655.7598	2.3766	2.0926	719	0.811339127	0.001874193	33.67306312	0.077784776
26.74874372	×ÔÉí³µÁ¾	Road 1	169.3283146	65.72515182	0.000702211	-0.221281812	0	0.011764706	186.1956	981.6045	655.7599	2.3728	2.0974	720	0.811195625	0.001873862	33.68655353	0.077815939
26.76537731	×ÔÉí³µÁ¾	Road 1	169.6318743	65.69931335	0.000702211	-0.221357271	0	0.011764706	186.5787	981.6182	655.76	2.3661	2.1041	721	0.810994659	0.001873398	33.70004328	0.0778471
26.78211573	×ÔÉí³µÁ¾	Road 1	169.9372615	65.68086319	0.000702211	-0.221546873	0	0.011764706	186.8522	981.6279	655.7601	2.3613	2.1099	722	0.810851158	0.001873066	33.71361565	0.077878452
26.79880613	×ÔÉí³µÁ¾	Road 1	170.2416929	65.66366959	0.000702211	-0.220395923	0	0.011764706	187.1075	981.6367	655.7601	2.3571	2.1141	723	0.81071743	0.001872757	33.72714685	0.077909709
26.815384	×ÔÉí³µÁ¾	Road 1	170.5439812	65.6427887	0.000702211	-0.220555559	0	0.011764706	187.3626	981.6455	655.76	2.353	2.1182	724	0.810564583	0.001872404	33.74058428	0.07794075
26.83211398	×ÔÉí³µÁ¾	Road 1	170.8489295	65.61952515	0.000702211	-0.218803778	0	0.011764706	187.7635	981.6592	655.7598	2.3466	2.1246	725	0.810374084	0.001871964	33.75414183	0.077972068
26.8487571	×ÔÉí³µÁ¾	Road 1	171.1522209	65.6036499	0.000702211	-0.218457058	0	0.011764706	188.0003	981.668	655.7595	2.3421	2.1291	726	0.81025061	0.001871679	33.76762693	0.078003218
26.86543614	×ÔÉí³µÁ¾	Road 1	171.456043	65.57689819	0.000702211	-0.215314686	0	0.011764706	188.4008	981.6816	655.759	2.3357	2.1355	727	0.810042542	0.001871198	33.78113766	0.078034428
26.88204553	×ÔÉí³µÁ¾	Road 1	171.7585183	65.55995865	0.000702211	-0.215120196	0	0.011764706	188.6557	981.6904	655.7587	2.3316	2.1396	728	0.809910789	0.001870894	33.79458978	0.078065502
26.898722	×ÔÉí³µÁ¾	Road 1	172.0621373	65.5431427	0.000702211	-0.212027952	0	0.011764706	188.9104	981.6992	655.7582	2.3274	2.1438	729	0.809779999	0.001870592	33.80809406	0.078096697
26.915522	×ÔÉí³µÁ¾	Road 1	172.3679164	65.52407455	0.000702211	-0.209369659	0	0.011764706	189.2015	981.71	655.7576	2.3219	2.1493	730	0.809631691	0.001870249	33.82169587	0.078128117
26.93219994	×ÔÉí³µÁ¾	Road 1	172.6713478	65.49689026	0.000702211	-0.205162525	0	0.011764706	189.6198	981.7246	655.7565	2.3149	2.1563	731	0.809420258	0.001869761	33.83519533	0.078159301
26.94871696	×ÔÉí³µÁ¾	Road 1	172.9717763	65.48049316	0.000702211	-0.202294335	0	0.011764706	189.8743	981.7334	655.7557	2.3107	2.1605	732	0.809292725	0.001869466	33.84856244	0.078190179
26.96543156	×ÔÉí³µÁ¾	Road 1	173.2757178	65.46311417	0.000702211	-0.200062498	0	0.011764706	190.147	981.7422	655.7549	2.3069	2.1643	733	0.809157555	0.001869154	33.86208718	0.078221421
27.0154617	×ÔÉí³µÁ¾	Road 1	174.1846352	65.40261383	0.000702211	-0.190671042	0	0.011764706	191.1097	981.7764	655.7513	2.2902	2.181	734	0.808686996	0.001868067	33.90254591	0.078314881
27.03209932	×ÔÉí³µÁ¾	Road 1	174.486825	65.38696518	0.000702211	-0.187982619	0	0.011764706	191.3638	981.7852	655.7502	2.286	2.1852	735	0.808565285	0.001867786	33.91599851	0.078345957
27.04884507	×ÔÉí³µÁ¾	Road 1	174.7909014	65.37033463	0.000702211	-0.185330287	0	0.011764706	191.6361	981.7949	655.749	2.2812	2.19	736	0.808435936	0.001867487	33.92953637	0.078377229
27.06536099	×ÔÉí³µÁ¾	Road 1	175.0906937	65.3461647	0.000702211	-0.181387454	0	0.011764706	192.0353	981.8086	655.7469	2.2748	2.1964	737	0.808247948	0.001867053	33.94288533	0.078408065
27.08202097	×ÔÉí³µÁ¾	Road 1	175.3930255	65.32989807	0.000702211	-0.178665146	0	0.011764706	192.3073	981.8174	655.7455	2.2709	2.2012	738	0.808121429	0.001866761	33.95634862	0.078439165
27.09878725	×ÔÉí³µÁ¾	Road 1	175.6972162	65.31481934	0.000702211	-0.175772652	0	0.011764706	192.5612	981.8262	655.7441	2.2667	2.2054	739	0.80800415	0.00186649	33.96989584	0.078470459
27.11536915	×ÔÉí³µÁ¾	Road 1	175.9979928	65.29985733	0.000702211	-0.173100665	0	0.011764706	192.815	981.835	655.7426	2.2626	2.2096	740	0.807887779	0.001866221	33.98329215	0.078501405
27.13203206	×ÔÉí³µÁ¾	Road 1	176.3001362	65.27769241	0.000702211	-0.170474693	0	0.011764706	193.1957	981.8486	655.7403	2.2558	2.2163	741	0.807715385	0.001865823	33.99675104	0.078532495
27.14942515	×ÔÉí³µÁ¾	Road 1	176.6154139	65.25578842	0.000702211	-0.16616106	0	0.011764706	193.5762	981.8613	655.7378	2.25	2.2221	742	0.807545021	0.001865429	34.01079674	0.07856494
27.16535385	×ÔÉí³µÁ¾	Road 1	176.9040829	65.24127274	0.000702211	-0.163902864	0	0.011764706	193.8298	981.8701	655.736	2.2458	2.2263	743	0.807432121	0.001865168	34.02365809	0.07859465
27.18204755	×ÔÉí³µÁ¾	Road 1	177.2065495	65.22697678	0.000702211	-0.16041033	0	0.011764706	194.0833	981.8789	655.7342	2.2416	2.2305	744	0.80732093	0.001864911	34.03713526	0.078625782
27.19872292	×ÔÉí³µÁ¾	Road 1	177.5086182	65.21277695	0.000702211	-0.159185201	0	0.011764706	194.3368	981.8877	655.7324	2.2375	2.2347	745	0.807210487	0.001864656	34.0505958	0.078656876
27.21541808	×ÔÉí³µÁ¾	Road 1	177.8109431	65.19069443	0.000702211	-0.098611832	0	0	194.7531	981.9023	655.7291	2.2304	2.2418	746	0.807038734	0.001864259	34.06406944	0.078688
27.23213708	×ÔÉí³µÁ¾	Road 1	178.1136583	65.18184357	0.000702211	0.000111555	0	0	195.0246	981.9121	655.7269	2.2255	2.2466	747	0.806969894	0.0018641	34.07756117	0.078719166
27.24880768	×ÔÉí³µÁ¾	Road 1	178.4154593	65.17361755	0.000702211	-0.013669663	0	0	195.3864	981.9238	655.7239	2.2204	2.2518	748	0.806905914	0.001863953	34.09101278	0.07875024
27.2654585	×ÔÉí³µÁ¾	Road 1	178.7168618	65.16493149	0.000702211	-0.077887625	0.011764706	0	195.6397	981.9326	655.7217	2.2162	2.2559	749	0.806838356	0.001863797	34.10444729	0.078781273
27.28269837	×ÔÉí³µÁ¾	Road 1	179.0288757	65.15419922	0.000702211	-0.089994445	0.019607844	0	195.893	981.9414	655.7194	2.212	2.2601	750	0.806754883	0.001863604	34.11835564	0.078813402
27.29874986	×ÔÉí³µÁ¾	Road 1	179.3193218	65.1407341	0.000702211	-0.019048581	0.027450981	0	196.2728	981.9551	655.7159	2.2052	2.2669	751	0.806650154	0.001863362	34.13130358	0.078843311
27.31546372	×ÔÉí³µÁ¾	Road 1	179.6217191	65.13337326	0.000702211	-0.000937584	0.043137256	0	196.5621	981.9648	655.7131	2.2007	2.2714	752	0.806592903	0.00186323	34.14478486	0.078874453
27.33208631	×ÔÉí³µÁ¾	Road 1	179.9224333	65.12651367	0.000702211	-0.02635579	0.06666667	0	196.8153	981.9736	655.7105	2.1965	2.2756	753	0.806539551	0.001863106	34.15819164	0.078905423
27.3488119	×ÔÉí³µÁ¾	Road 1	180.2249535	65.11414719	0.000702211	-0.04220102	0.082352944	0	197.1949	981.9863	655.7067	2.1907	2.2814	754	0.806443367	0.001862884	34.17167988	0.078936581
27.36535238	×ÔÉí³µÁ¾	Road 1	180.52409	65.10643616	0.000702211	-0.015985673	0.105882354	0	197.448	981.9951	655.704	2.1864	2.2856	755	0.806383392	0.001862746	34.18501785	0.078967391
27.38223852	×ÔÉí³µÁ¾	Road 1	180.8294482	65.10009842	0.000702211	0.007867953	0.121568628	0	197.701	982.0039	655.7012	2.1821	2.2898	756	0.806334099	0.001862632	34.19863372	0.078998844
27.39874711	×ÔÉí³µÁ¾	Road 1	181.1279392	65.09142609	0.000702211	0.00825483	0.137254909	0	198.0806	982.0166	655.697	2.176	2.2966	757	0.806266647	0.001862476	34.21194404	0.079029591
27.4157117	×ÔÉí³µÁ¾	Road 1	181.4346439	65.08479996	0.000702211	-0.014157171	0.160784319	0	198.3335	982.0254	655.6941	2.1717	2.3008	758	0.806215111	0.001862357	34.22562115	0.079061185
27.43224558	×ÔÉí³µÁ¾	Road 1	181.733515	65.074617	0.000702211	0.001445167	0.168627456	0	198.713	982.0391	655.6896	2.1647	2.3076	759	0.80613591	0.001862174	34.2389497	0.079091974
27.44870285	×ÔÉí³µÁ¾	Road 1	182.0309763	65.06915817	0.000702211	0.027509745	0.184313729	0	198.9659	982.0479	655.6865	2.1606	2.3118	760	0.806093452	0.001862076	34.2522158	0.079122619
27.46541194	×ÔÉí³µÁ¾	Road 1	182.3329697	65.0649353	0.000702211	0.047997534	0.192156866	0	199.2188	982.0557	655.6833	2.1575	2.315	761	0.806060608	0.001862	34.26568435	0.079153731
27.48201877	×ÔÉí³µÁ¾	Road 1	182.6330922	65.06006012	0.000702211	0.070689946	0.200000003	0	199.5981	982.0693	655.6785	2.1508	2.3218	762	0.80602269	0.001861912	34.27906983	0.079184651
27.49884626	×ÔÉí³µÁ¾	Road 1	182.9371926	65.05788345	0.000702211	0.090173833	0.20784314	0	199.851	982.0781	655.6752	2.1467	2.326	763	0.80600576	0.001861873	34.29263288	0.079215982
27.51538528	×ÔÉí³µÁ¾	Road 1	183.2360748	65.05684662	0.000702211	0.11403653	0.20784314	0	200.1039	982.0859	655.6719	2.1436	2.3292	764	0.805997696	0.001861855	34.30596329	0.079246775
27.53201923	×ÔÉí³µÁ¾	Road 1	183.5366735	65.05701141	0.000702211	0.133753195	0.20784314	0	200.4832	982.0996	655.6667	2.1369	2.336	765	0.811568975	0.001874724	34.31946289	0.079277959
27.54877048	×ÔÉí³µÁ¾	Road 1	183.8393946	65.0576088	0.000702211	0.138205215	0.20784314	0	200.736	982.1084	655.6632	2.1328	2.3402	766	0.826053595	0.001908184	34.33330032	0.079309924
27.56535934	×ÔÉí³µÁ¾	Road 1	184.1391853	65.05848083	0.000702211	0.144772112	0.20784314	0	200.9889	982.1162	655.6595	2.1295	2.3434	767	0.83556559	0.001930157	34.3471614	0.079341943
27.58201602	×ÔÉí³µÁ¾	Road 1	184.4402127	65.06090469	0.000702211	0.165948823	0.20784314	0	201.3863	982.1299	655.6538	2.1231	2.3498	768	0.88784633	0.002050925	34.36194997	0.079376104
27.59873611	×ÔÉí³µÁ¾	Road 1	184.742397	65.06325989	0.000702211	0.176173523	0.20784314	0	201.6392	982.1387	655.65	2.1188	2.354	769	0.885248276	0.002044924	34.37675141	0.079410296
27.61533378	×ÔÉí³µÁ¾	Road 1	185.0423816	65.06606827	0.000702211	0.182366163	0.20784314	0	201.8921	982.1475	655.6462	2.1146	2.3582	770	0.901210302	0.002081796	34.39170939	0.079444849
27.63206193	×ÔÉí³µÁ¾	Road 1	185.3447472	65.07089539	0.000702211	0.189852819	0.20784314	0	202.2896	982.1611	655.6401	2.1082	2.3646	771	0.968371466	0.002236938	34.40790846	0.079482269
27.64913429	×ÔÉí³µÁ¾	Road 1	185.6533493	65.07407455	0.000702211	0.197746232	0.20784314	0	202.5244	982.1689	655.6364	2.1046	2.3681	772	0.910851927	0.002104068	34.42345884	0.07951819
27.66583422	×ÔÉí³µÁ¾	Road 1	185.9552402	65.07853775	0.000702211	0.204985231	0.20784314	0	202.8135	982.1787	655.6317	2.1001	2.3727	773	0.956469236	0.002209444	34.43943182	0.079555087
27.68204443	×ÔÉí³µÁ¾	Road 1	186.2483071	65.08493729	0.000702211	0.212621823	0.20784314	0	203.193	982.1924	655.6255	2.0933	2.3795	774	1.02825655	0.002375273	34.45610007	0.079593591
27.69888402	×ÔÉí³µÁ¾	Road 1	186.5527737	65.08946915	0.000702211	0.216733083	0.20784314	0	203.446	982.2002	655.6212	2.09	2.3828	775	0.95762625	0.002212117	34.47222611	0.079630842
27.71532736	×ÔÉí³µÁ¾	Road 1	186.8500977	65.094207	0.000702211	0.222260907	0.20784314	0	203.699	982.209	655.6169	2.0858	2.388	776	0.968368913	0.002236932	34.48814933	0.079667625
27.7320119	×ÔÉí³µÁ¾	Road 1	187.1518197	65.10216522	0.000702211	0.228706568	0.20784314	0	204.0966	982.2227	655.6101	2.0794	2.3945	777	1.074689168	0.002482532	34.50608002	0.079709045
27.74869094	×ÔÉí³µÁ¾	Road 1	187.4534668	65.10742493	0.000702211	0.232413813	0.20784314	0	204.3497	982.2314	655.6056	2.0752	2.3988	778	0.983816712	0.002272617	34.52248913	0.07974695
27.76541616	×ÔÉí³µÁ¾	Road 1	187.7559876	65.1157196	0.000702211	0.237768382	0.20784314	0	204.7294	982.2441	655.5988	2.0693	2.4046	779	1.08551636	0.002507543	34.54064464	0.079788889
27.7820886	×ÔÉí³µÁ¾	Road 1	188.0575803	65.12146683	0.000702211	0.242089286	0.215686277	0	204.9825	982.2529	655.5941	2.0651	2.4088	780	1.000489211	0.00231113	34.55732523	0.079827421
27.79866134	×ÔÉí³µÁ¾	Road 1	188.3573969	65.12742691	0.000702211	0.246440455	0.223529413	0	205.2357	982.2617	655.5895	2.0609	2.413	781	1.008948816	0.002330672	34.57404628	0.079866047
27.81539353	×ÔÉí³µÁ¾	Road 1	188.6601418	65.13682709	0.000702211	0.255769342	0.223529413	0	205.6154	982.2744	655.5823	2.0551	2.4188	782	1.122841389	0.002593764	34.59283387	0.079909446
27.83208503	×ÔÉí³µÁ¾	Road 1	188.9621815	65.14351501	0.000702211	0.259673268	0.239215687	0	205.8687	982.2832	655.5774	2.0509	2.423	783	1.032229696	0.002384451	34.61006333	0.079949246
27.84871458	×ÔÉí³µÁ¾	Road 1	189.2631369	65.15144577	0.000702211	0.266991973	0.247058824	0	206.1581	982.293	655.5718	2.0464	2.4275	784	1.075233684	0.00248379	34.62794399	0.079990551
27.86536979	×ÔÉí³µÁ¾	Road 1	189.5646078	65.16250763	0.000702211	0.279805541	0.262745112	0	206.538	982.3057	655.5643	2.0406	2.4334	785	1.180802546	0.002727654	34.64761051	0.08003598
27.88211994	×ÔÉí³µÁ¾	Road 1	189.8678373	65.1711113	0.000702211	0.290262043	0.278431386	0	206.8094	982.3145	655.5588	2.0367	2.4372	786	1.096157115	0.002532123	34.6659713	0.080078394
27.89883453	×ÔÉí³µÁ¾	Road 1	190.1704627	65.17966003	0.000702211	0.301511705	0.294117659	0	207.0628	982.3232	655.5536	2.0325	2.4414	787	1.095026032	0.00252951	34.68427422	0.080120673
27.91537758	×ÔÉí³µÁ¾	Road 1	190.4700458	65.19350967	0.000702211	0.319286525	0.309803933	0	207.4429	982.3359	655.5457	2.0267	2.4472	788	1.278682857	0.002953757	34.70542753	0.080169538
27.93207641	×ÔÉí³µÁ¾	Road 1	190.7724968	65.2035759	0.000702211	0.333140463	0.34117648	0	207.6964	982.3447	655.5404	2.0225	2.4514	789	1.146788728	0.002649082	34.72457756	0.080213774
27.94869863	×ÔÉí³µÁ¾	Road 1	191.0736141	65.215242	0.000702211	0.34982872	0.372549027	0	207.968	982.3535	655.5345	2.0186	2.4553	790	1.202742125	0.002778334	34.7445698	0.080259956
27.96534835	×ÔÉí³µÁ¾	Road 1	191.3753115	65.23299179	0.000702211	0.372134537	0.388235301	0	208.3483	982.3672	655.5264	2.0118	2.4621	791	1.408275175	0.003253116	34.76801718	0.08031412
27.98201602	×ÔÉí³µÁ¾	Road 1	191.677393	65.24567413	0.000702211	0.384323418	0.411764711	0	208.6019	982.375	655.5208	2.0086	2.4653	792	1.236456184	0.002856214	34.78862603	0.080361726
28.00092079	×ÔÉí³µÁ¾	Road 1	192.0201258	65.26597824	0.000702211	0.406628788	0.435294122	0	208.9825	982.3877	655.5123	2.0028	2.4711	793	1.413306593	0.003264738	34.81534426	0.080423445
28.01632055	×ÔÉí³µÁ¾	Road 1	192.2993865	65.28273926	0.000702211	0.429214239	0.458823532	0	209.2725	982.3975	655.5057	1.9983	2.4766	794	1.421717541	0.003284168	34.83723837	0.080474021
28.03267262	×ÔÉí³µÁ¾	Road 1	192.5959932	65.29964447	0.000702211	0.449982613	0.482352942	0	209.5444	982.4072	655.4995	1.9935	2.4815	795	1.39121774	0.003213713	34.85998766	0.080526571
28.04879229	×ÔÉí³µÁ¾	Road 1	192.8884599	65.31646042	0.000702211	0.469473183	0.490196079	0	209.7983	982.416	655.4937	1.9893	2.4856	796	1.39678585	0.003226575	34.88250339	0.080578583
28.06538519	×ÔÉí³µÁ¾	Road 1	193.189594	65.33414841	0.000702211	0.48851645	0.505882382	0	210.0523	982.4238	655.4875	1.9861	2.4889	797	1.409952406	0.00325699	34.90589859	0.080632626
28.08207229	×ÔÉí³µÁ¾	Road 1	193.4925693	65.3625206	0.000704384	0.517622113	0.513725519	0	210.4333	982.4375	655.4785	1.9803	2.4956	798	1.768570327	0.004085397	34.9354109	0.080700799
28.09870771	×ÔÉí³µÁ¾	Road 1	193.7946993	65.38267365	0.000708014	0.53636688	0.521568656	0	210.6875	982.4453	655.4724	1.9771	2.4988	799	1.492940946	0.003448694	34.9602466	0.08075817
28.11540471	×ÔÉí³µÁ¾	Road 1	194.0980958	65.4145752	0.000715312	0.553140998	0.521568656	0	211.0689	982.458	655.4631	1.9714	2.5046	800	1.888609055	0.004362687	34.9917807	0.080831013
28.13209804	×ÔÉí³µÁ¾	Road 1	194.4015285	65.43676071	0.000723397	0.576757491	0.521568656	0	211.3232	982.4668	655.4568	1.9672	2.5088	801	1.560381069	0.00360448	35.01782866	0.080891184
28.14868874	×ÔÉí³µÁ¾	Road 1	194.7032016	65.45977707	0.000733775	0.590093315	0.521568656	0	211.5777	982.4756	655.4504	1.963	2.513	802	1.593794506	0.003681665	35.04427082	0.080952266
28.16764739	×ÔÉí³µÁ¾	Road 1	195.0481287	65.49714432	0.00074651	0.608133137	0.521568656	0	211.9777	982.4893	655.4402	1.9566	2.5194	803	1.924731163	0.004446129	35.08076113	0.081036558
28.18343753	×ÔÉí³µÁ¾	Road 1	195.3355085	65.51983109	0.000760154	0.618482232	0.521568656	0	212.2142	982.4971	655.4342	1.9531	2.523	804	1.62298574	0.003749097	35.1063883	0.081095757
28.19938455	×ÔÉí³µÁ¾	Road 1	195.6258622	65.54661026	0.000780153	0.628791928	0.521568656	0	212.4872	982.5059	655.4271	1.9493	2.5268	805	1.760832202	0.004067522	35.13446834	0.081160622
28.21543275	×ÔÉí³µÁ¾	Road 1	195.9182372	65.58682022	0.000796561	0.642356813	0.521568656	0	212.8878	982.5195	655.4166	1.9429	2.5332	806	2.229843673	0.005150939	35.1702533	0.081243285
28.23199155	×ÔÉí³µÁ¾	Road 1	196.2200348	65.61288528	0.000816391	0.64989692	0.521568656	0	213.1429	982.5283	655.4098	1.9387	2.5374	807	1.702693783	0.003933223	35.19844788	0.081308415
28.24871751	×ÔÉí³µÁ¾	Road 1	196.5250014	65.63927307	0.000834924	0.657254577	0.521568656	0	213.398	982.5361	655.403	1.9356	2.5406	808	1.705277186	0.00393919	35.22697027	0.081374301
28.26539398	×ÔÉí³µÁ¾	Road 1	196.8292615	65.6815567	0.000854558	0.663719594	0.521568656	0	213.7992	982.5498	655.392	1.9292	2.547	809	2.249604548	0.005196587	35.26448574	0.081460962
28.28207412	×ÔÉí³µÁ¾	Road 1	197.1337148	65.70878906	0.000871154	0.67262435	0.521568656	0	214.0546	982.5586	655.3849	1.925	2.5511	810	1.737966786	0.004014703	35.29347527	0.081527928
28.30083886	×ÔÉí³µÁ¾	Road 1	197.4763811	65.74023743	0.000885428	0.678536117	0.521568656	0	214.3467	982.5684	655.3768	1.9206	2.5556	811	1.763222879	0.004073045	35.32656169	0.081604358
28.31655862	×ÔÉí³µÁ¾	Road 1	197.7636251	65.78207474	0.000894747	0.685893834	0.521568656	0	214.7302	982.5811	655.366	1.9148	2.5613	812	2.324155472	0.005368799	35.36309686	0.081688754
28.33203169	×ÔÉí³µÁ¾	Road 1	198.046482	65.81015854	0.000904987	0.690290213	0.521568656	0	214.986	982.5898	655.3587	1.9107	2.5664	813	1.843887768	0.004259381	35.39162746	0.081754659
28.34864952	×ÔÉí³µÁ¾	Road 1	198.3503967	65.83851013	0.000910136	0.694202423	0.521568656	0	215.242	982.5986	655.3513	1.9066	2.5705	814	1.782593598	0.004117791	35.42125028	0.081823088
28.36537877	×ÔÉí³µÁ¾	Road 1	198.6564821	65.86709518	0.000914442	0.698798001	0.529411793	0	215.498	982.6064	655.3439	1.9034	2.5737	815	1.784710147	0.00412268	35.45110716	0.081892058
28.38203178	×ÔÉí³µÁ¾	Road 1	198.961382	65.91237259	0.000914442	0.706189156	0.529411793	0	215.9006	982.6201	655.3322	1.8971	2.5801	816	2.360824804	0.005453505	35.490422	0.081982875
28.39876287	×ÔÉí³µÁ¾	Road 1	199.2678469	65.94153442	0.000914442	0.710944057	0.529411793	0	216.157	982.6289	655.3245	1.8929	2.5842	817	1.805918425	0.004171672	35.52063698	0.082052671
28.41538326	×ÔÉí³µÁ¾	Road 1	199.5724198	65.97092285	0.000914442	0.7153548	0.529411793	0	216.4135	982.6377	655.3168	1.8888	2.5883	818	1.820975987	0.004206455	35.55090231	0.082122584
28.43206193	×ÔÉí³µÁ¾	Road 1	199.8782766	66.01751862	0.000914442	0.721417665	0.545098066	0	216.8167	982.6504	655.3046	1.8834	2.5937	819	2.40679291	0.005559692	35.59104442	0.082215313
28.4486343	×ÔÉí³µÁ¾	Road 1	200.1823217	66.04742203	0.000914442	0.727676392	0.552941203	0	217.0735	982.6592	655.2966	1.8793	2.5978	820	1.843392622	0.004258237	35.6215938	0.082285882
28.46536576	×ÔÉí³µÁ¾	Road 1	200.4894973	66.09300156	0.000914442	0.740797162	0.56078434	0	217.4588	982.6719	655.2848	1.8736	2.6035	821	2.369502289	0.00547355	35.66123903	0.082377462
28.48198212	×ÔÉí³µÁ¾	Road 1	200.7947024	66.12391434	0.000914442	0.749742568	0.568627477	0	217.7159	982.6807	655.2767	1.8695	2.6076	822	1.877147931	0.004336212	35.69243039	0.082449514
28.49875536	×ÔÉí³µÁ¾	Road 1	201.1029353	66.15527344	0.000914442	0.756617188	0.58431375	0	217.9731	982.6895	655.2686	1.8654	2.6117	823	1.883155618	0.004350089	35.72401701	0.082522479
28.51532113	×ÔÉí³µÁ¾	Road 1	201.4075124	66.18934479	0.000914442	0.766151071	0.58431375	0	218.2488	982.6982	655.2598	1.8616	2.6155	824	1.99096755	0.004599135	35.75699893	0.082598668
28.53210537	×ÔÉí³µÁ¾	Road 1	201.7163546	66.24260788	0.000914442	0.781542957	0.58431375	0	218.6718	982.7119	655.2462	1.8556	2.6215	825	2.631156179	0.006077971	35.80116088	0.082700682
28.54872026	×ÔÉí³µÁ¾	Road 1	202.0222324	66.27550507	0.000914442	0.788826823	0.58431375	0	218.9295	982.7207	655.2378	1.8515	2.6256	826	1.949231988	0.004502726	35.83354716	0.082775494
28.56535458	×ÔÉí³µÁ¾	Road 1	202.3286217	66.30878677	0.000914442	0.794398069	0.592156887	0	219.1873	982.7295	655.2294	1.8474	2.6297	827	1.961975377	0.004532163	35.86618328	0.082850883
28.58202299	×ÔÉí³µÁ¾	Road 1	202.6358728	66.35929642	0.000914442	0.805307865	0.592156887	0	219.5742	982.7422	655.2165	1.8417	2.6354	828	2.553247244	0.005898001	35.90874185	0.082949194
28.59870422	×ÔÉí³µÁ¾	Road 1	202.9435182	66.3933609	0.00091358	0.812161624	0.592156887	0	219.8323	982.751	655.2079	1.8376	2.6395	829	1.987778186	0.004591768	35.94190045	0.08302579
28.61542835	×ÔÉí³µÁ¾	Road 1	203.2521951	66.44514771	0.000909277	0.82119149	0.592156887	0	220.2198	982.7637	655.1948	1.8319	2.6461	830	2.594185624	0.005992569	35.98528593	0.083126011
28.63198716	×ÔÉí³µÁ¾	Road 1	203.5579807	66.4799057	0.000904987	0.826553166	0.592156887	0	220.4782	982.7715	655.1859	1.8288	2.6492	831	2.022700067	0.004672437	36.01877943	0.08320338
28.64867939	×ÔÉí³µÁ¾	Road 1	203.8664045	66.51751328	0.000899004	0.830695689	0.592156887	0	220.7553	982.7813	655.1764	1.824	2.654	832	2.112111953	0.004878979	36.0540353	0.083284822
28.66537602	×ÔÉí³µÁ¾	Road 1	204.1750734	66.55282059	0.000893048	0.834539056	0.592156887	0	221.0141	982.79	655.1675	1.8199	2.6581	833	2.033539145	0.004697475	36.08798855	0.083363254
28.68198615	×ÔÉí³µÁ¾	Road 1	204.4824009	66.60870667	0.000889656	0.841906071	0.592156887	0	221.421	982.8027	655.1532	1.8146	2.6634	834	2.754010485	0.006361764	36.13373301	0.083468923
28.6987187	×ÔÉí³µÁ¾	Road 1	204.7921843	66.64972	0.000885428	0.844744503	0.592156887	0	221.7171	982.8125	655.1427	1.8101	2.6677	835	2.2297556	0.005150735	36.17104252	0.083555108
28.71532773	×ÔÉí³µÁ¾	Road 1	205.0998584	66.68825455	0.000881214	0.848626792	0.592156887	0	221.9949	982.8223	655.1328	1.8054	2.6725	836	2.155414185	0.004979007	36.20684185	0.083637805
28.73211637	×ÔÉí³µÁ¾	Road 1	205.4110283	66.72439957	0.000874499	0.85297811	0.592156887	0	222.2544	982.8301	655.1234	1.8023	2.6756	837	2.060085462	0.004758797	36.24142788	0.083717698
28.74870633	×ÔÉí³µÁ¾	Road 1	205.7187793	66.78154221	0.000866153	0.858216524	0.592156887	0	222.6623	982.8438	655.1086	1.796	2.6818	838	2.806414664	0.006482818	36.2879862	0.083825248
28.76537987	×ÔÉí³µÁ¾	Road 1	206.02825	66.81811295	0.000855383	0.861044288	0.592156887	0	222.9221	982.8525	655.0991	1.7919	2.6859	839	2.085873091	0.004818367	36.32276509	0.083905587
28.78204388	×ÔÉí³µÁ¾	Road 1	206.3377372	66.85989532	0.000842251	0.863126338	0.58431375	0	223.1821	982.8613	655.0896	1.7878	2.69	840	2.268315178	0.005239808	36.36056431	0.083992904
28.79864081	×ÔÉí³µÁ¾	Road 1	206.6462099	66.91008224	0.000828446	0.866005242	0.58431375	0	223.5723	982.874	655.075	1.7821	2.6956	841	2.56826304	0.005932688	36.4031896	0.084091368
28.81534661	×ÔÉí³µÁ¾	Road 1	206.9568773	66.94696884	0.000813197	0.866336703	0.58431375	0	223.8326	982.8818	655.0652	1.779	2.6986	842	2.09780092	0.00484592	36.43823503	0.084172323
28.83199412	×ÔÉí³µÁ¾	Road 1	207.2666436	66.98651276	0.000800501	0.868809104	0.58431375	0	224.1117	982.8916	655.0547	1.7743	2.7033	843	2.195688868	0.005072041	36.47478779	0.08425676
28.85145495	×ÔÉí³µÁ¾	Road 1	207.6290595	67.04219971	0.000784818	0.871938109	0.58431375	0	224.5026	982.9043	655.0397	1.7687	2.7099	844	2.478631577	0.005725639	36.52302403	0.084368186
28.86664504	×ÔÉí³µÁ¾	Road 1	207.9121103	67.08210754	0.000764738	0.873488307	0.58431375	0	224.7821	982.9131	655.0289	1.7649	2.7136	845	2.344358923	0.005415469	36.55863504	0.084450447
28.88198468	×ÔÉí³µÁ¾	Road 1	208.1981184	67.12211151	0.000744252	0.87549901	0.58431375	0	225.0618	982.9229	655.0181	1.7602	2.7183	846	2.334357694	0.005392366	36.59444325	0.084533164
28.89868021	×ÔÉí³µÁ¾	Road 1	208.5096799	67.18091583	0.000727833	0.87866354	0.58431375	0	225.4722	982.9355	655.002	1.755	2.7235	847	2.8665036	0.006621623	36.64230106	0.084643715
28.91528814	×ÔÉí³µÁ¾	Road 1	208.8197791	67.21834488	0.000710198	0.881114006	0.58431375	0	225.7336	982.9443	654.9917	1.7509	2.7276	848	2.131609295	0.004924017	36.67770267	0.084725493
28.93216622	×ÔÉí³µÁ¾	Road 1	209.1350996	67.25609665	0.000688558	0.882658601	0.58431375	0	225.9951	982.9531	654.9813	1.7468	2.7316	849	2.122784979	0.004903633	36.7135312	0.084808257
28.99911733	×ÔÉí³µÁ¾	Road 1	210.3893031	67.43924561	0.000672268	0.894908905	0.58431375	0	227.2676	982.9941	654.9297	1.7288	2.7495	850	2.416671092	0.00558251	36.87533002	0.085182012
29.01532425	×ÔÉí³µÁ¾	Road 1	210.6930952	67.48056107	0.000656929	0.896008134	0.58431375	0	227.5487	983.0039	654.9181	1.7241	2.7542	851	2.311027441	0.005338473	36.91278464	0.085268533
29.03202308	×ÔÉí³µÁ¾	Road 1	211.0063751	67.53811569	0.000624945	0.899251282	0.58431375	0	227.9427	983.0166	654.9016	1.7186	2.7597	852	2.83610637	0.006551406	36.96014431	0.085377933
29.04866216	×ÔÉí³µÁ¾	Road 1	211.3187125	67.57672577	0.000624276	0.902185559	0.58431375	0	228.2055	983.0254	654.8906	1.7145	2.7637	853	2.180341116	0.005036588	36.99642318	0.085461738
29.06531554	×ÔÉí³µÁ¾	Road 1	211.6314968	67.61531525	0.000624276	0.903984964	0.58431375	0	228.4684	983.0332	654.8795	1.7115	2.7668	854	2.179529115	0.005034712	37.03271971	0.085545583
29.08199751	×ÔÉí³µÁ¾	Road 1	211.9451004	67.67622757	0.000624276	0.906395257	0.58431375	0	228.882	983.0469	654.8619	1.7053	2.7729	855	2.960946016	0.006839785	37.08211412	0.085659684
29.09879495	×ÔÉí³µÁ¾	Road 1	212.2610561	67.71512604	0.000624276	0.910378754	0.58431375	0	229.1453	983.0557	654.8505	1.7012	2.7769	856	2.181436645	0.005039119	37.11875666	0.085744328
29.11529914	×ÔÉí³µÁ¾	Road 1	212.5716753	67.7542511	0.000624276	0.912547588	0.58431375	0	229.4088	983.0645	654.8391	1.6972	2.7809	857	2.214643535	0.005115827	37.15530756	0.08582876
29.13198001	×ÔÉí³µÁ¾	Road 1	212.8859045	67.8157196	0.000624276	0.915659368	0.58431375	0	229.8232	983.0781	654.821	1.691	2.7871	858	2.986096827	0.006897884	37.20511826	0.085943823
29.14863962	×ÔÉí³µÁ¾	Road 1	213.199915	67.85499573	0.000624276	0.918747187	0.58431375	0	230.0871	983.0859	654.8094	1.688	2.7911	859	2.209840211	0.005104731	37.24193333	0.086028866
29.16539123	×ÔÉí³µÁ¾	Road 1	213.515935	67.9141571	0.000624276	0.920326114	0.58431375	0	230.4833	983.0986	654.7919	1.6825	2.7966	860	2.900106462	0.006699246	37.2905148	0.086141089
29.18388876	×ÔÉí³µÁ¾	Road 1	213.8650949	67.95373535	0.000624276	0.924027622	0.58431375	0	230.7476	983.1074	654.78	1.6785	2.8006	861	2.084682931	0.004815618	37.32907627	0.086230166
29.19870569	×ÔÉí³µÁ¾	Road 1	214.144943	67.9933754	0.000624276	0.925876856	0.58431375	0	231.0121	983.1162	654.7682	1.6746	2.8045	862	2.40038967	0.0055449	37.36464269	0.086312325
29.21533084	×ÔÉí³µÁ¾	Road 1	214.4591404	68.03609848	0.000624276	0.928263545	0.58431375	0	231.2956	983.125	654.7554	1.6709	2.8082	863	2.339642604	0.005404574	37.40353961	0.086402176
29.23201941	×ÔÉí³µÁ¾	Road 1	214.7748272	68.09885788	0.000624276	0.932374418	0.58431375	0	231.7117	983.1387	654.7365	1.6648	2.8143	864	3.041796607	0.00702655	37.45430284	0.08651944
29.24867389	×ÔÉí³µÁ¾	Road 1	215.0900541	68.13884125	0.000624276	0.9341923	0.58431375	0	231.9768	983.1475	654.7243	1.6608	2.8183	865	2.243250208	0.005181908	37.491663	0.086605742
29.26530638	×ÔÉí³µÁ¾	Road 1	215.4051434	68.19914932	0.000624276	0.937268376	0.58431375	0	232.3746	983.1602	654.7059	1.6554	2.8237	866	2.96652136	0.006852664	37.54100362	0.086719718
29.28201327	×ÔÉí³µÁ¾	Road 1	215.7218296	68.23950348	0.000624945	0.939720213	0.58431375	0	232.6401	983.1689	654.6935	1.6514	2.8277	867	2.254761393	0.005208499	37.57867369	0.086806736
29.29868718	×ÔÉí³µÁ¾	Road 1	216.0380773	68.2798439	0.000628297	0.942765951	0.58431375	0	232.9057	983.1777	654.681	1.6484	2.8317	868	2.258250643	0.005216559	37.61632755	0.086893717
29.31533836	×ÔÉí³µÁ¾	Road 1	216.3541896	68.34375687	0.000632336	0.946098268	0.58431375	0	233.3233	983.1914	654.6614	1.6423	2.8377	869	3.097524976	0.007155283	37.66790499	0.087012861
29.33373251	×ÔÉí³µÁ¾	Road 1	216.7036145	68.38746872	0.000637069	0.948884845	0.58431375	0	233.6084	983.2002	654.6478	1.6387	2.8413	870	2.235912297	0.005164957	37.70903271	0.087107866
29.35241038	×ÔÉí³µÁ¾	Road 1	217.0587616	68.45158081	0.000643189	0.952053428	0.58431375	0	234.0267	983.2139	654.6277	1.6327	2.8474	871	2.861978967	0.006611171	37.76248837	0.087231348
29.38207724	×ÔÉí³µÁ¾	Road 1	217.6231951	68.49262161	0.000652787	0.954456091	0.58431375	0	234.2932	983.2227	654.6149	1.6287	2.8514	872	1.651318995	0.003814547	37.81147782	0.087344514
29.39867857	×ÔÉí³µÁ¾	Road 1	217.9394546	68.58090363	0.000663872	0.959458351	0.58431375	0	234.8647	983.2412	654.5871	1.6205	2.8595	873	3.983083915	0.009200924	37.8776023	0.087497261
29.41529969	×ÔÉí³µÁ¾	Road 1	218.2562822	68.62228088	0.000687131	0.962105572	0.58431375	0	235.1316	983.249	654.574	1.6176	2.8625	874	2.309600495	0.005335177	37.91599045	0.087585938
29.43203774	×ÔÉí³µÁ¾	Road 1	218.5756282	68.68455276	0.000703659	0.965398371	0.58431375	0	235.5323	983.2627	654.5542	1.6112	2.8689	875	3.0415175	0.007025905	37.96689953	0.087703538
29.44866913	×ÔÉí³µÁ¾	Road 1	218.8931306	68.72600555	0.000721186	0.967822969	0.58431375	0	235.7997	983.2705	654.5408	1.6082	2.8718	876	2.314422257	0.005346315	38.00539158	0.087792455
29.46529868	×ÔÉí³µÁ¾	Road 1	219.2108058	68.7709877	0.00073975	0.970009446	0.58431375	0	236.0864	983.2803	654.5265	1.6037	2.8764	877	2.441959321	0.005640926	38.04600027	0.087886261
29.48199201	×ÔÉí³µÁ¾	Road 1	219.5299067	68.81568146	0.000757108	0.972673357	0.58431375	0	236.3732	983.2891	654.512	1.6001	2.88	878	2.426940216	0.005606232	38.086514	0.087979847
29.49865675	×ÔÉí³µÁ¾	Road 1	219.8487525	68.87865372	0.000773191	0.976350486	0.58431375	0	236.7751	983.3027	654.4916	1.5937	2.8864	879	3.08399964	0.007124039	38.13790806	0.088098568
29.51539444	×ÔÉí³µÁ¾	Road 1	220.1691905	68.92090988	0.000793418	0.978766501	0.58431375	0	237.0432	983.3105	654.478	1.5908	2.8893	880	2.339281757	0.005403741	38.17706222	0.088189014
29.53202583	×ÔÉí³µÁ¾	Road 1	220.4878874	68.98455505	0.000807626	0.980949998	0.58431375	0	237.4458	983.3242	654.4575	1.5844	2.8966	881	3.116896665	0.007200031	38.22890053	0.08830876
29.54862935	×ÔÉí³µÁ¾	Road 1	220.8062467	69.02710648	0.00082522	0.983277917	0.58431375	0	237.7143	983.333	654.4439	1.5805	2.9005	882	2.365191267	0.005463592	38.26817105	0.088399475
29.56528383	×ÔÉí³µÁ¾	Road 1	221.1257956	69.07307739	0.000842251	0.984926999	0.58431375	0	238.0023	983.3418	654.4293	1.577	2.9041	883	2.484370837	0.005738897	38.30954695	0.088495053
29.5986826	×ÔÉí³µÁ¾	Road 1	221.7674687	69.16493683	0.000852911	0.987641871	0.58431375	0	238.5787	983.3604	654.4	1.5689	2.9122	884	2.480822148	0.005730699	38.39240334	0.088686452
29.61530848	×ÔÉí³µÁ¾	Road 1	222.0872235	69.23643036	0.000861171	0.986198962	0.58431375	0	239.0212	983.374	654.3774	1.5633	2.9178	885	3.410116815	0.00787737	38.44909956	0.08881742
29.63203298	×ÔÉí³µÁ¾	Road 1	222.4090764	69.27986755	0.000869485	0.986268759	0.58431375	0	239.2907	983.3828	654.3638	1.5594	2.9217	886	2.393350713	0.00552864	38.48912713	0.088909884
29.64861084	×ÔÉí³µÁ¾	Road 1	222.7283084	69.32345581	0.000871154	0.985479176	0.58431375	0	239.5605	983.3916	654.35	1.5555	2.9256	887	2.41388118	0.005576066	38.52914414	0.089002323
29.66535403	×ÔÉí³µÁ¾	Road 1	223.0510416	69.39179764	0.000871154	0.986078501	0.58431375	0	239.9846	983.4053	654.3285	1.5495	2.9316	888	3.286273298	0.007591291	38.58416682	0.089129425
29.69868975	×ÔÉí³µÁ¾	Road 1	223.6946095	69.50036316	0.000871154	0.985517323	0.58431375	0	240.6604	983.4268	654.2941	1.5402	2.9408	889	2.795090874	0.00645666	38.67734318	0.089344663
29.71542963	×ÔÉí³µÁ¾	Road 1	224.017986	69.54381409	0.000871154	0.984978795	0.58431375	0	240.9309	983.4355	654.2804	1.5363	2.9446	890	2.400385573	0.005544891	38.71752536	0.089437484
29.74864218	×ÔÉí³µÁ¾	Road 1	224.6604894	69.64270477	0.000871154	0.984682381	0.58431375	0	241.4339	983.4512	654.2545	1.5298	2.9511	891	2.632408748	0.006080864	38.80495437	0.089639445
29.7657226	×ÔÉí³µÁ¾	Road 1	224.9911356	69.68954773	0.000871154	0.984070003	0.58431375	0	241.8405	983.4648	654.2341	1.5235	2.9574	892	2.49315695	0.005759193	38.84753853	0.089737814
29.78195004	×ÔÉí³µÁ¾	Road 1	225.3055638	69.75477219	0.000871154	0.983363032	0.58431375	0	242.2476	983.4775	654.2131	1.5182	2.9627	893	3.264370674	0.007540696	38.90051091	0.08986018
29.79866207	×ÔÉí³µÁ¾	Road 1	225.6295969	69.80116196	0.000871154	0.983458936	0.58431375	0	242.5386	983.4873	654.1986	1.5137	2.9672	894	2.516778246	0.005813758	38.94257138	0.08995734
29.81565891	×ÔÉí³µÁ¾	Road 1	225.959355	69.84411163	0.000871154	0.985297203	0.592156887	0	242.8103	983.4951	654.1848	1.5108	2.9701	895	2.36798999	0.005470057	38.98281973	0.090050314
29.83194207	×ÔÉí³µÁ¾	Road 1	226.2755629	69.90955582	0.000871154	0.98500222	0.592156887	0	243.2183	983.5088	654.1638	1.5045	2.9763	896	3.270790711	0.007555527	39.03607853	0.090173341
29.84866913	×ÔÉí³µÁ¾	Road 1	226.6006059	69.95581512	0.000871154	0.987831771	0.592156887	0	243.5099	983.5176	654.1492	1.501	2.9808	897	2.515471644	0.005810739	39.07815497	0.090270538
29.86528475	×ÔÉí³µÁ¾	Road 1	226.9236846	69.99936905	0.000869485	0.988936961	0.592156887	0	243.7822	983.5264	654.1351	1.4972	2.9847	898	2.429634419	0.005612456	39.11852486	0.090363792
29.88197772	×ÔÉí³µÁ¾	Road 1	227.2485707	70.0648407	0.000866985	0.988072276	0.592156887	0	244.1911	983.5391	654.1144	1.4919	2.99	899	3.218671251	0.007435131	39.17225404	0.090487907
29.8986212	×ÔÉí³µÁ¾	Road 1	227.5726232	70.09284897	0.00086449	0.987982333	0.592156887	0	244.3664	983.5449	654.1054	1.4892	2.9927	900	1.86432586	0.004306593	39.20328291	0.090559584
29.91532223	×ÔÉí³µÁ¾	Road 1	227.8981141	70.16136932	0.000859515	0.98900187	0.592156887	0	244.7953	983.5586	654.0836	1.4833	2.9986	901	3.33212402	0.007697206	39.25893282	0.090688135
29.93198037	×ÔÉí³µÁ¾	Road 1	228.2229711	70.20500565	0.000854558	0.990088999	0.592156887	0	245.0685	983.5674	654.0697	1.4794	3.0024	902	2.434833074	0.005624464	39.29949262	0.090781828
29.94864768	×ÔÉí³µÁ¾	Road 1	228.5483099	70.27047043	0.000849621	0.989479303	0.592156887	0	245.4785	983.5801	654.0488	1.4742	3.0077	903	3.23065544	0.007462814	39.35333895	0.090906213
29.9652886	×ÔÉí³µÁ¾	Road 1	228.8733356	70.31419601	0.000842251	0.989918768	0.592156887	0	245.7521	983.5889	654.0349	1.4703	3.0115	904	2.443059085	0.005643466	39.39399369	0.091000125
29.9819801	×ÔÉí³µÁ¾	Road 1	229.1996521	70.37950287	0.000835736	0.989758074	0.592156887	0	246.1628	983.6016	654.0144	1.4651	3.0168	905	3.225994132	0.007452046	39.44784037	0.091124511
29.99860012	×ÔÉí³µÁ¾	Road 1	229.5247726	70.42311859	0.000828446	0.990426242	0.592156887	0	246.4368	983.6104	654.0004	1.4613	3.0206	906	2.444368855	0.005646492	39.48846584	0.091218356
30.01524764	×ÔÉí³µÁ¾	Road 1	229.8506327	70.46674118	0.00082361	0.990271091	0.600000024	0	246.711	983.6191	653.9865	1.4574	3.0244	907	2.443310166	0.005644046	39.52914088	0.091312315
30.03197579	×ÔÉí³µÁ¾	Road 1	230.1783763	70.53239822	0.000816391	0.99168247	0.600000024	0	247.1226	983.6328	653.9656	1.4512	3.0307	908	3.239877964	0.007484118	39.58333806	0.091437511
30.04871495	×ÔÉí³µÁ¾	Road 1	230.5065381	70.57600021	0.000811602	0.99368006	0.600000024	0	247.3972	983.6406	653.9515	1.4484	3.0335	909	2.437137327	0.005629787	39.62413368	0.091531749
30.06542587	×ÔÉí³µÁ¾	Road 1	230.8344537	70.64217224	0.000809215	0.993721187	0.600000024	0	247.672	983.6494	653.9376	1.4446	3.0373	910	3.265720335	0.007543814	39.6787069	0.091657813
30.08194986	×ÔÉí³µÁ¾	Road 1	231.1589004	70.68563004	0.000807626	0.994561791	0.600000024	0	248.0844	983.6631	653.9166	1.4385	3.0435	911	2.455843632	0.005672999	39.71928722	0.091751553
30.09859957	×ÔÉí³µÁ¾	Road 1	231.4860206	70.72989807	0.000806039	0.994085789	0.600000024	0	248.3596	983.6719	653.9023	1.4349	3.0473	912	2.474785646	0.005716755	39.76049169	0.091846736
30.11525698	×ÔÉí³µÁ¾	Road 1	231.8136093	70.79847336	0.000805246	0.995482922	0.600000024	0	248.6547	983.6807	653.8873	1.4315	3.0508	913	3.368254405	0.007780668	39.81659809	0.091976342
30.13191256	×ÔÉí³µÁ¾	Road 1	232.1413655	70.84248047	0.000802871	0.99629879	0.600000024	0	249.0681	983.6934	653.8666	1.4263	3.056	914	2.468090101	0.005701288	39.85770556	0.0920713
30.14868287	×ÔÉí³µÁ¾	Road 1	232.4715843	70.88643265	0.000801291	0.9965446	0.600000024	0	249.3439	983.7021	653.8523	1.4225	3.0598	915	2.456360186	0.005674192	39.89889948	0.092166458
30.16531792	×ÔÉí³µÁ¾	Road 1	232.7994606	70.95589371	0.000796561	0.99599117	0.607843161	0	249.7776	983.7158	653.8306	1.4166	3.0666	916	3.411090404	0.007879619	39.95564314	0.092297536
30.18205781	×ÔÉí³µÁ¾	Road 1	233.1296079	70.99989395	0.000793418	0.997913182	0.607843161	0	250.0539	983.7246	653.8162	1.4128	3.0704	917	2.464494886	0.005692983	39.99689851	0.092392836
30.19862908	×ÔÉí³µÁ¾	Road 1	233.4566304	71.04348907	0.000787157	1.000419259	0.607843161	0	250.3303	983.7334	653.8022	1.409	3.0742	918	2.467239252	0.005699323	40.0377838	0.092487281
30.21615156	×ÔÉí³µÁ¾	Road 1	233.8027798	71.11651382	0.000773963	1.001919627	0.615686297	0	250.7848	983.748	653.7791	1.4025	3.0806	919	3.413098367	0.007884257	40.09758976	0.092625432
30.23198312	×ÔÉí³µÁ¾	Road 1	234.115719	71.160466	0.000757108	1.003964067	0.615686297	0	251.0617	983.7568	653.7653	1.3988	3.0844	920	2.56023777	0.005914149	40.13812232	0.092719063
30.24876406	×ÔÉí³µÁ¾	Road 1	234.4476312	71.20483017	0.00073303	1.005904913	0.615686297	0	251.3387	983.7656	653.7509	1.395	3.0882	921	2.480124801	0.005729088	40.17974114	0.092815202
30.26526202	×ÔÉí³µÁ¾	Road 1	234.7742519	71.27149658	0.000708014	1.00707221	0.615686297	0	251.7546	983.7783	653.73	1.3899	3.0934	922	3.342060144	0.007720159	40.23487831	0.092942569
30.28201621	×ÔÉí³µÁ¾	Road 1	235.1061543	71.31645813	0.000682863	1.007933617	0.615686297	0	252.0321	983.7871	653.7159	1.3861	3.0973	923	2.508106246	0.005793725	40.27689958	0.093039638
30.29856218	×ÔÉí³µÁ¾	Road 1	235.4341366	71.36091843	0.000659007	1.009224772	0.615686297	0	252.3098	983.7959	653.7015	1.3824	3.1012	924	2.511630875	0.005801867	40.31845697	0.093135636
30.31531417	×ÔÉí³µÁ¾	Road 1	235.7665143	71.42793503	0.000632336	1.010346293	0.623529434	0	252.6075	983.8047	653.6866	1.379	3.1046	925	3.323825462	0.007678037	40.37413764	0.093264258
30.33209511	×ÔÉí³µÁ¾	Road 1	236.0995999	71.45656815	0.000610997	1.011435151	0.623529434	0	252.9053	983.8145	653.6715	1.3747	3.1089	926	1.909239236	0.004410343	40.40617647	0.093338268
30.34859233	×ÔÉí³µÁ¾	Road 1	236.4273626	71.52388	0.000592078	1.015128136	0.623529434	0	253.3227	983.8271	653.6503	1.3695	3.1139	927	3.377108156	0.00780112	40.46188939	0.093466964
30.36528237	×ÔÉí³µÁ¾	Road 1	236.7592381	71.58474426	0.000575451	1.01581347	0.623529434	0	253.6012	983.8359	653.6361	1.3658	3.1175	928	3.111808548	0.007188278	40.51382558	0.093586937
30.38200796	×ÔÉí³µÁ¾	Road 1	237.0920748	71.63944244	0.000561629	1.017647505	0.631372571	0	254.0391	983.8496	653.6138	1.3601	3.1231	929	2.881103883	0.00665535	40.56201374	0.093698252
30.39865694	×ÔÉí³µÁ¾	Road 1	237.4236101	71.68769989	0.000552949	1.01958406	0.631372571	0	254.338	983.8594	653.5986	1.3558	3.1273	930	2.652668999	0.006127665	40.60617798	0.093800271
30.41532388	×ÔÉí³µÁ¾	Road 1	237.7557122	71.7328743	0.000546804	1.022320628	0.631372571	0	254.6171	983.8682	653.5844	1.352	3.131	931	2.537619712	0.005861902	40.64847233	0.093897971
30.43204434	×ÔÉí³µÁ¾	Road 1	238.089196	71.80075607	0.000541921	1.0252316	0.639215708	0	255.0361	983.8809	653.5631	1.347	3.1361	932	3.376368975	0.007799412	40.70492677	0.094028381
30.44864127	×ÔÉí³µÁ¾	Road 1	238.4204258	71.8462738	0.000541312	1.027331233	0.639215708	0	255.3156	983.8896	653.549	1.3433	3.1399	933	2.561090373	0.005916119	40.74743301	0.09412657
30.46530234	×ÔÉí³µÁ¾	Road 1	238.7531467	71.89181213	0.000541312	1.029259205	0.639215708	0	255.5953	983.8984	653.5347	1.3395	3.1436	934	2.556733341	0.005906054	40.79003094	0.094224971
30.48196159	×ÔÉí³µÁ¾	Road 1	239.0861782	71.96685562	0.000541312	1.032746553	0.639215708	0	256.0552	983.9131	653.5113	1.3333	3.15	935	3.659863103	0.008454284	40.85100149	0.094365813
30.49862596	×ÔÉí³µÁ¾	Road 1	239.419509	72.00935898	0.000541312	1.033448577	0.639215708	0	256.3154	983.9209	653.498	1.3302	3.154	936	2.446820796	0.005652156	40.89177623	0.094460003
30.51528851	×ÔÉí³µÁ¾	Road 1	239.7530152	72.0551651	0.000541312	1.034109235	0.639215708	0	256.5958	983.9297	653.4838	1.3265	3.1578	937	2.571713958	0.005940659	40.93462753	0.09455899
30.53192392	×ÔÉí³µÁ¾	Road 1	240.0863111	72.12714615	0.000541312	1.036159277	0.639215708	0	257.0367	983.9434	653.4614	1.3208	3.1635	938	3.556737996	0.008216065	40.99379535	0.094695667
30.54856924	×ÔÉí³µÁ¾	Road 1	240.4200176	72.173069	0.000541312	1.036848426	0.639215708	0	257.3175	983.9521	653.4471	1.3171	3.1672	939	2.581577368	0.005963444	41.03676652	0.094794931
30.56529336	×ÔÉí³µÁ¾	Road 1	240.7555175	72.21901245	0.000541312	1.036668658	0.639215708	0	257.5985	983.9609	653.4328	1.3134	3.1709	940	2.575686894	0.005949837	41.07984262	0.094894436
30.58194711	×ÔÉí³µÁ¾	Road 1	241.0899246	72.28797226	0.000541312	1.037507534	0.639215708	0	257.8998	983.9707	653.4175	1.3092	3.1752	941	3.44780791	0.007964436	41.13726154	0.095027074
30.598562	×ÔÉí³µÁ¾	Road 1	241.4237924	72.34016418	0.000541312	1.038826466	0.639215708	0	258.342	983.9844	653.395	1.3035	3.1809	942	2.825742205	0.006527464	41.18421094	0.095135527
30.6152645	×ÔÉí³µÁ¾	Road 1	241.7596508	72.38980179	0.000541312	1.038166523	0.639215708	0	258.6438	983.9932	653.3796	1.3002	3.1842	943	2.721567361	0.006286821	41.22966791	0.095240533
30.63211252	×ÔÉí³µÁ¾	Road 1	242.098759	72.45891266	0.000541312	1.038097858	0.639215708	0	259.0666	984.0068	653.3582	1.2942	3.1903	944	3.430978888	0.007925561	41.28747311	0.095374063
30.64856942	×ÔÉí³µÁ¾	Road 1	242.4302052	72.50491104	0.000541312	1.037931204	0.639215708	0	259.3487	984.0156	653.3435	1.2906	3.194	945	2.614729201	0.006040024	41.33050346	0.095473463
30.66525726	×ÔÉí³µÁ¾	Road 1	242.7665156	72.55090942	0.000543139	1.03777647	0.639215708	0	259.631	984.0244	653.3294	1.2869	3.1976	946	2.591954651	0.005987415	41.37375757	0.09557338
30.68189341	×ÔÉí³µÁ¾	Road 1	243.102103	72.61982117	0.000546804	1.038590312	0.639215708	0	260.0547	984.0371	653.3076	1.2819	3.2027	947	3.463199687	0.007999991	41.43137189	0.095706469
30.69865675	×ÔÉí³µÁ¾	Road 1	243.4404704	72.66584702	0.000550485	1.038446665	0.647058845	0	260.3375	984.0459	653.2935	1.2783	3.2064	948	2.588820135	0.005980175	41.47476917	0.095806717
30.71524452	×ÔÉí³µÁ¾	Road 1	243.775521	72.71516876	0.000554801	1.039090872	0.647058845	0	260.6406	984.0557	653.2778	1.274	3.2107	949	2.733409376	0.006314176	41.52011033	0.095911455
30.73479699	×ÔÉí³µÁ¾	Road 1	244.1708103	72.78064728	0.000561629	1.043761849	0.654901981	0	261.0451	984.0684	653.2575	1.2685	3.216	950	2.971452666	0.006864056	41.57820957	0.096045664
30.75172785	×ÔÉí³µÁ¾	Road 1	244.5134282	72.85066452	0.000566629	1.045859933	0.654901981	0	261.4702	984.0811	653.2359	1.2635	3.2211	951	3.468954374	0.008013285	41.63694196	0.096181336
30.76606863	×ÔÉí³µÁ¾	Road 1	244.8038305	72.90039825	0.000575451	1.047348738	0.654901981	0	261.7741	984.0908	653.2204	1.2593	3.2253	952	3.051106342	0.007048056	41.68069719	0.096282411
30.78194454	×ÔÉí³µÁ¾	Road 1	245.1255246	72.94690475	0.000582447	1.048846006	0.662745118	0	262.058	984.0996	653.206	1.2566	3.229	953	2.713469673	0.006268115	41.723776	0.096381923
30.79858986	×ÔÉí³µÁ¾	Road 1	245.4630394	72.99670715	0.000590143	1.051004648	0.662745118	0	262.3622	984.1094	653.1906	1.2524	3.2333	954	2.754554324	0.00636302	41.76962643	0.096487837
30.81526376	×ÔÉí³µÁ¾	Road 1	245.8013506	73.04350204	0.000599207	1.05391407	0.662745118	0	262.6465	984.1182	653.1761	1.2488	3.2369	955	2.639107976	0.006096339	41.81363067	0.096589487
30.83196223	×ÔÉí³µÁ¾	Road 1	246.1405014	73.11705551	0.000609021	1.057224512	0.662745118	0	263.0934	984.1318	653.1533	1.2432	3.2425	956	3.650577242	0.008432833	41.8745897	0.096730302
30.84857126	×ÔÉí³µÁ¾	Road 1	246.4780522	73.1640152	0.000618941	1.058273435	0.662745118	0	263.3781	984.1406	653.1389	1.2396	3.2461	957	2.656167157	0.006135746	41.91870605	0.096832211
30.86533973	×ÔÉí³µÁ¾	Road 1	246.8191407	73.22778397	0.000630988	1.058540225	0.670588255	0	263.663	984.1494	653.1243	1.236	3.2498	958	3.275098202	0.007565477	41.97362446	0.096959073
30.88199018	×ÔÉí³µÁ¾	Road 1	247.1580777	73.28171997	0.000643189	1.0621984	0.670588255	0	264.0906	984.1621	653.1027	1.2311	3.2548	959	2.920666945	0.006746741	42.02225487	0.097071409
30.89857465	×ÔÉí³µÁ¾	Road 1	247.4958889	73.32888565	0.000654856	1.064756155	0.670588255	0	264.3759	984.1709	653.0881	1.2274	3.2584	960	2.671996491	0.006172312	42.06656851	0.097173773
30.91524195	×ÔÉí³µÁ¾	Road 1	247.835717	73.40003586	0.000670163	1.066765785	0.670588255	0	264.8042	984.1846	653.0663	1.2216	3.2637	961	3.577398054	0.00826379	42.1261941	0.097311508
30.93198221	×ÔÉí³µÁ¾	Road 1	248.1772528	73.44744873	0.000684995	1.067004204	0.670588255	0	265.09	984.1934	653.0518	1.218	3.2671	962	2.668405715	0.006164017	42.17086389	0.097414696
30.94864878	×ÔÉí³µÁ¾	Road 1	248.5175208	73.4983017	0.000700044	1.06846571	0.678431392	0	265.3964	984.2031	653.0362	1.2138	3.2723	963	2.809011927	0.006488818	42.2176805	0.097522842
30.9652985	×ÔÉí³µÁ¾	Road 1	248.8577584	73.56613541	0.000721186	1.071398854	0.678431392	0	265.8052	984.2158	653.0154	1.2085	3.2776	964	3.461165823	0.007995293	42.27530792	0.097655961
30.98194234	×ÔÉí³µÁ¾	Road 1	249.1981129	73.61737289	0.000736012	1.074676156	0.678431392	0	266.1121	984.2246	652.9998	1.2053	3.2808	965	2.830415291	0.006538259	42.32241692	0.097764783
30.99966643	×ÔÉí³µÁ¾	Road 1	249.5609108	73.68911362	0.000753311	1.075683355	0.678431392	0	266.5421	984.2383	652.978	1.1994	3.2867	966	3.449498505	0.007968342	42.38355614	0.097906015
31.01522051	×ÔÉí³µÁ¾	Road 1	249.8794972	73.73698654	0.000773191	1.076735377	0.678431392	0	266.829	984.2471	652.9634	1.1958	3.2903	967	2.834173633	0.006546941	42.4276391	0.098007846
31.03198129	×ÔÉí³µÁ¾	Road 1	250.2230224	73.78480453	0.00079185	1.077655554	0.686274529	0	267.1161	984.2559	652.9488	1.1923	3.2939	968	2.692478196	0.006219625	42.47276713	0.098112092
31.14860113	×ÔÉí³µÁ¾	Road 1	252.6264125	74.19153214	0.00080842	1.087357879	0.686274529	0	269.5433	984.3301	652.8253	1.1622	3.3243	969	3.107053672	0.007177294	42.83511123	0.098949107
31.16529556	×ÔÉí³µÁ¾	Road 1	252.9707534	74.25392075	0.000830871	1.088436842	0.686274529	0	269.8116	984.3389	652.8116	1.1582	3.3282	970	3.274616183	0.007564363	42.88977909	0.09907539
31.18206624	×ÔÉí³µÁ¾	Road 1	253.3169405	74.31266327	0.000937929	1.0890131	0.694117665	0	270.2658	984.3525	652.7886	1.1528	3.3337	971	3.126556109	0.007222345	42.94221355	0.099196513
31.19864814	×ÔÉí³µÁ¾	Road 1	253.6594384	74.35771408	0.000950264	1.090498209	0.694117665	0	270.5345	984.3613	652.7749	1.1489	3.3376	972	2.623660663	0.006060656	42.98571883	0.099297011
31.21527549	×ÔÉí³µÁ¾	Road 1	254.0031317	74.41327744	0.0009636	1.092366576	0.694117665	0	270.8654	984.3711	652.7581	1.1452	3.3414	973	3.026929857	0.006992208	43.03604867	0.099413272
31.23206193	×ÔÉí³µÁ¾	Road 1	254.3503729	74.46894379	0.000975258	1.09465003	0.694117665	0	271.1965	984.3809	652.7412	1.1414	3.3452	974	3.012542754	0.006958974	43.08661853	0.099530089
31.24854266	×ÔÉí³µÁ¾	Road 1	254.6916251	74.54207153	0.000986103	1.09438014	0.694117665	0	271.6315	984.3945	652.7191	1.1356	3.351	975	3.736751126	0.008631895	43.14820292	0.099672349
31.2652338	×ÔÉí³µÁ¾	Road 1	255.0374762	74.59433212	0.001003437	1.095015764	0.694117665	0	271.9424	984.4043	652.7032	1.1315	3.3551	976	2.897871409	0.006694083	43.19657168	0.099784081
31.28196599	×ÔÉí³µÁ¾	Road 1	255.384502	74.66405411	0.001018191	1.096006274	0.694117665	0	272.3574	984.417	652.6822	1.1264	3.3613	977	3.568160309	0.00824245	43.25627481	0.099921995
31.29863036	×ÔÉí³µÁ¾	Road 1	255.7303475	74.71288147	0.001035898	1.096665502	0.694117665	0	272.6481	984.4258	652.6674	1.1229	3.3649	978	2.772314672	0.006404047	43.30247371	0.100028714
31.31522473	×ÔÉí³µÁ¾	Road 1	256.074965	74.76172943	0.001052862	1.096482992	0.694117665	0	272.939	984.4346	652.6526	1.1194	3.3684	979	2.782717316	0.006428077	43.34865113	0.100135384
31.3319943	×ÔÉí³µÁ¾	Road 1	256.4234651	74.81405869	0.00107001	1.096304655	0.694117665	0	273.2509	984.4434	652.6367	1.1162	3.3715	980	2.898705334	0.006696009	43.39726119	0.100247673
31.34859087	×ÔÉí³µÁ¾	Road 1	256.7687235	74.89081879	0.001084441	1.096431613	0.694117665	0	273.7087	984.458	652.6134	1.1099	3.3779	981	3.874310347	0.008949657	43.46156143	0.100396207
31.36520319	×ÔÉí³µÁ¾	Road 1	257.1145513	74.94316177	0.001099001	1.096631527	0.694117665	0	274.0211	984.4668	652.5975	1.1068	3.3811	982	2.922850236	0.006751784	43.51011677	0.10050837
31.38187966	×ÔÉí³µÁ¾	Road 1	257.4619412	74.992099	0.0011078	1.096251488	0.694117665	0	274.3129	984.4766	652.5827	1.1023	3.3856	983	2.784446322	0.006432071	43.55655151	0.100615634
31.39857006	×ÔÉí³µÁ¾	Road 1	257.8099605	75.06526794	0.001112708	1.097057462	0.694117665	0	274.751	984.4893	652.5604	1.0976	3.3903	984	3.726340273	0.008607846	43.61874562	0.100759302
31.43189808	×ÔÉí³µÁ¾	Road 1	258.5060285	75.18733292	0.001112708	1.096177936	0.694117665	0	275.482	984.5117	652.5232	1.0884	3.3995	985	3.26265205	0.007536726	43.72748335	0.101010487
31.44893085	×ÔÉí³µÁ¾	Road 1	258.8620119	75.23971024	0.001112708	1.096200585	0.701960802	0	275.7957	984.5215	652.5073	1.0844	3.4036	986	2.883987282	0.006662011	43.77660562	0.101123959
31.49861607	×ÔÉí³µÁ¾	Road 1	259.9020664	75.35834885	0.001109761	1.099282146	0.701960802	0	276.5074	984.543	652.4711	1.0758	3.4122	987	2.439942385	0.005636267	43.8978347	0.101403998
31.51521446	×ÔÉí³µÁ¾	Road 1	260.2500513	75.47391129	0.001101929	1.100509405	0.701960802	0	277.1993	984.5635	652.4358	1.0679	3.4201	988	5.424636481	0.01253091	43.98787496	0.101611991
31.53193162	×ÔÉí³µÁ¾	Road 1	260.6007376	75.51944962	0.001071927	1.101171732	0.701960802	0	277.4722	984.5713	652.4219	1.065	3.4239	989	2.664651988	0.006155346	44.03242037	0.101714891
31.54861323	×ÔÉí³µÁ¾	Road 1	260.9509217	75.57202606	0.001062366	1.101811051	0.701960802	0	277.7872	984.5811	652.4059	1.061	3.428	990	2.945455693	0.006804003	44.0815553	0.101828393
31.56520136	×ÔÉí³µÁ¾	Road 1	261.2995147	75.65258331	0.001051915	1.102162242	0.701960802	0	278.2707	984.5957	652.3813	1.0551	3.4338	991	4.061720085	0.009382573	44.14893165	0.101984032
31.58190532	×ÔÉí³µÁ¾	Road 1	261.6507706	75.70186386	0.001041532	1.101931691	0.701960802	0	278.5653	984.6045	652.3664	1.0517	3.4373	992	2.818245266	0.006510147	44.19600751	0.102092777
31.59860855	×ÔÉí³µÁ¾	Road 1	262.0023365	75.77199097	0.001031219	1.102086544	0.709803939	0	278.9864	984.6172	652.3449	1.0466	3.4423	993	3.637270712	0.008402095	44.25676169	0.102233119
31.61527659	×ÔÉí³µÁ¾	Road 1	262.3534047	75.82448502	0.001020045	1.104843616	0.709803939	0	279.3025	984.627	652.3289	1.0426	3.4463	994	2.95273844	0.006820826	44.30597805	0.102346809
31.63300801	×ÔÉí³µÁ¾	Road 1	262.7272001	75.89146042	0.001009874	1.106422305	0.709803939	0	279.7032	984.6387	652.3085	1.0382	3.4508	995	3.366468828	0.007776543	44.36567033	0.102484698
31.64859728	×ÔÉí³µÁ¾	Road 1	263.0560505	75.94080963	0.001000687	1.107481599	0.709803939	0	279.9987	984.6475	652.2934	1.0348	3.4542	996	2.96748413	0.006854888	44.41193123	0.102591561
31.68281676	×ÔÉí³µÁ¾	Road 1	263.7791052	76.06768112	0.000990645	1.108483791	0.709803939	0	280.7594	984.6709	652.2548	1.0251	3.4638	997	3.326875862	0.007685083	44.5257752	0.102854541
31.69861313	×ÔÉí³µÁ¾	Road 1	264.1130987	76.11728439	0.000985196	1.109081984	0.709803939	0	281.0555	984.6797	652.2396	1.0217	3.4672	998	2.956964946	0.006830589	44.57248451	0.102962439
31.71527824	×ÔÉí³µÁ¾	Road 1	264.465689	76.16661301	0.000975258	1.109165549	0.709803939	0	281.3519	984.6885	652.2245	1.0183	3.4706	999	2.840132543	0.006560706	44.61981563	0.103071774
31.73191549	×ÔÉí³µÁ¾	Road 1	264.8180489	76.24431381	0.000975258	1.109263301	0.709803939	0	281.818	984.7021	652.2008	1.0131	3.4758	1000	3.968705113	0.009167709	44.68584397	0.1032243
31.74856228	×ÔÉí³µÁ¾	Road 1	265.170823	76.29022293	0.000975258	1.109095335	0.709803939	0	282.0937	984.71	652.1868	1.0102	3.4786	1001	2.711058754	0.006262546	44.73097437	0.103328551
31.76521455	×ÔÉí³µÁ¾	Road 1	265.5239582	76.3431015	0.000975258	1.109536171	0.717647076	0	282.4119	984.7197	652.1707	1.0062	3.4836	1002	2.988077341	0.006902459	44.78073267	0.103443492
31.78191412	×ÔÉí³µÁ¾	Road 1	265.8783096	76.38913422	0.000975258	1.110783815	0.717647076	0	282.6879	984.7285	652.1566	1.0024	3.4874	1003	2.713315574	0.006267759	44.82604386	0.103548161
31.79865877	×ÔÉí³µÁ¾	Road 1	266.2339972	76.47069397	0.000975258	1.11358273	0.717647076	0	283.1767	984.7432	652.1318	0.9966	3.4931	1004	4.111958166	0.009498623	44.89489717	0.103707212
31.81520402	×ÔÉí³µÁ¾	Road 1	266.5856768	76.52027664	0.000977962	1.114432096	0.717647076	0	283.4744	984.752	652.1166	0.9932	3.4965	1005	2.876253851	0.006644146	44.94248549	0.103817141
31.83185593	×ÔÉí³µÁ¾	Road 1	266.9399686	76.59483261	0.000977962	1.114580393	0.717647076	0	283.9214	984.7646	652.0939	0.9886	3.5011	1006	3.857971619	0.008911914	45.0067281	0.103965542
31.84854303	×ÔÉí³µÁ¾	Road 1	267.2952391	76.64444275	0.000977962	1.115870595	0.725490212	0	284.2196	984.7734	652.0787	0.9852	3.5045	1007	2.864656104	0.006617356	45.05453091	0.104075966
31.86525506	×ÔÉí³µÁ¾	Road 1	267.6513047	76.70142746	0.000980671	1.117479086	0.725490212	0	284.5607	984.7842	652.0613	0.9806	3.509	1008	3.155920767	0.007290177	45.10727275	0.1041978
31.88199165	×ÔÉí³µÁ¾	Road 1	268.0082252	76.77274246	0.000987918	1.12011528	0.725490212	0	284.9874	984.7969	652.0396	0.9756	3.514	1009	3.722862077	0.008599811	45.16958075	0.104341732
31.89854862	×ÔÉí³µÁ¾	Road 1	268.3615779	76.82983017	0.000996114	1.122193575	0.725490212	0	285.329	984.8066	652.0222	0.972	3.5175	1010	3.186024326	0.007359716	45.22233168	0.104463586
31.931991	×ÔÉí³µÁ¾	Road 1	269.0762226	76.92995682	0.001007112	1.123044252	0.725490212	0	285.9275	984.8242	651.9918	0.9653	3.5242	1011	2.887543165	0.006670225	45.318898	0.104686654
31.94862459	×ÔÉí³µÁ¾	Road 1	269.4320537	77.01236801	0.001020045	1.123342276	0.725490212	0	286.4197	984.8389	651.9667	0.9595	3.5299	1012	4.194637571	0.009689613	45.38866986	0.104847827
31.96522958	×ÔÉí³µÁ¾	Road 1	269.787504	77.0624382	0.001051915	1.124611616	0.725490212	0	286.7195	984.8477	651.9515	0.9571	3.5333	1013	2.90687282	0.006714876	45.43693847	0.104959328
31.98188626	×ÔÉí³µÁ¾	Road 1	270.1442933	77.11269379	0.001068095	1.123796105	0.725490212	0	287.0196	984.8564	651.9362	0.9537	3.5366	1014	2.909752607	0.006721529	45.48540528	0.105071286
31.99858289	×ÔÉí³µÁ¾	Road 1	270.5022869	77.18784714	0.001086375	1.124968529	0.725490212	0	287.47	984.8701	651.9133	0.9482	3.5431	1015	3.90137712	0.009012181	45.55054514	0.105221759
32.01529492	×ÔÉí³µÁ¾	Road 1	270.860844	77.23811646	0.001105841	1.124149084	0.725490212	0	287.7705	984.8789	651.898	0.9449	3.5464	1016	2.907878665	0.0067172	45.59914169	0.105334017
32.03196956	×ÔÉí³µÁ¾	Road 1	271.218947	77.31325607	0.001123557	1.124917984	0.725490212	0	288.2217	984.8926	651.875	0.9393	3.5519	1017	3.910645709	0.009033592	45.6643503	0.105484649
32.0485203	×ÔÉí³µÁ¾	Road 1	271.5746203	77.36353226	0.001138465	1.124080181	0.725490212	0	288.5227	984.9014	651.8597	0.936	3.5552	1018	2.931982525	0.00677288	45.71287679	0.105596745
32.0652437	×ÔÉí³µÁ¾	Road 1	271.9342367	77.41367111	0.001152497	1.124319792	0.725490212	0	288.824	984.9102	651.8444	0.9326	3.5585	1019	2.907225009	0.00671569	45.76149545	0.105709054
32.08234317	×ÔÉí³µÁ¾	Road 1	272.3022974	77.4888176	0.00116563	1.124675751	0.725490212	0	289.2762	984.9229	651.8214	0.9281	3.563	1020	3.844179878	0.008880056	45.82722892	0.105860899
32.09853762	×ÔÉí³µÁ¾	Road 1	272.6511192	77.54252014	0.00117478	1.12408793	0.725490212	0	289.5994	984.9326	651.8049	0.9242	3.5669	1021	3.124530994	0.007217667	45.87782898	0.105977785
32.11519723	×ÔÉí³µÁ¾	Road 1	273.0101928	77.59274826	0.001186029	1.124052167	0.725490212	0	289.9014	984.9414	651.7896	0.9209	3.5702	1022	2.924542546	0.006755693	45.92655072	0.106090332
32.13198551	×ÔÉí³µÁ¾	Road 1	273.3723901	77.66792908	0.001194254	1.123372793	0.725490212	0	290.3546	984.9551	651.7665	0.9154	3.5756	1023	3.90839949	0.009028403	45.99216599	0.106241903
32.14862459	×ÔÉí³µÁ¾	Road 1	273.7316165	77.72152863	0.001203553	1.123808026	0.725490212	0	290.6786	984.9648	651.7501	0.9115	3.5795	1024	3.067400129	0.007085694	46.04320472	0.106359803
32.16519109	×ÔÉí³µÁ¾	Road 1	274.0895069	77.77171555	0.001213942	1.12338686	0.725490212	0	290.9812	984.9736	651.7346	0.9081	3.5828	1025	2.940311854	0.00679212	46.09191541	0.106472325
32.18202922	×ÔÉí³µÁ¾	Road 1	274.453616	77.84671783	0.001227537	1.122929096	0.717647076	0	291.4355	984.9863	651.7115	0.9037	3.5872	1026	3.900668049	0.009010543	46.15759534	0.106624045
32.1985466	×ÔÉí³µÁ¾	Road 1	274.8110351	77.90026932	0.001240175	1.120233774	0.717647076	0	291.7603	984.9961	651.6949	0.8999	3.5911	1027	3.087780961	0.007132774	46.20859741	0.10674186
32.23198972	×ÔÉí³µÁ¾	Road 1	275.5352389	77.95726089	0.001261432	1.117994308	0.717647076	0	292.1069	985.0059	651.6774	0.8964	3.5955	1028	2.053998212	0.004744736	46.27728951	0.106900539
32.24855916	×ÔÉí³µÁ¾	Road 1	275.8946192	78.08165359	0.001284012	1.115226984	0.709803939	0	292.8661	985.0283	651.6387	0.8878	3.6042	1029	5.969079494	0.013788574	46.3761938	0.107129008
32.26528328	×ÔÉí³µÁ¾	Road 1	276.2575847	78.13118134	0.001346653	1.113614082	0.701960802	0	293.1702	985.0371	651.6233	0.8846	3.6075	1030	2.906650479	0.006714363	46.42480499	0.1072413
32.28192677	×ÔÉí³µÁ¾	Road 1	276.6190452	78.1842247	0.001384971	1.108208776	0.701960802	0	293.4961	985.0469	651.6067	0.8807	3.6113	1031	3.06074093	0.007070312	46.47574637	0.107358974
32.29858014	×ÔÉí³µÁ¾	Road 1	276.9810617	78.25796356	0.001425168	1.103005409	0.701960802	0	293.9528	985.0596	651.5834	0.8764	3.6157	1032	3.901840178	0.009013251	46.5407252	0.107509075
32.3320141	×ÔÉí³µÁ¾	Road 1	277.708768	78.35575562	0.001474422	1.099562407	0.701960802	0	294.5624	985.0781	651.5524	0.8689	3.6232	1033	2.88881132	0.006673154	46.63730958	0.107732185
32.34861139	×ÔÉí³µÁ¾	Road 1	278.0703859	78.43593521	0.001519952	1.097207308	0.701960802	0	295.0637	985.0918	651.5269	0.8644	3.6278	1034	4.182956212	0.009662629	46.70673534	0.107892559
32.36522995	×ÔÉí³µÁ¾	Road 1	278.4327247	78.49175262	0.001617586	1.09528172	0.701960802	0	295.4128	985.1025	651.5092	0.86	3.6322	1035	3.187994729	0.007364268	46.75971521	0.108014942
32.38187856	×ÔÉí³µÁ¾	Road 1	278.7959427	78.54016113	0.001664715	1.093914866	0.701960802	0	295.7184	985.1113	651.4936	0.8568	3.6355	1036	2.883811067	0.006661604	46.80772667	0.108125849
32.39862981	×ÔÉí³µÁ¾	Road 1	279.1616418	78.59216766	0.001708823	1.092895627	0.701960802	0	296.046	985.1201	651.4769	0.854	3.6383	1037	3.019217289	0.006974392	46.85830233	0.108242678
32.41517946	×ÔÉí³µÁ¾	Road 1	279.5232741	78.66489716	0.001760368	1.091363192	0.701960802	0	296.5051	985.1338	651.4536	0.8487	3.6447	1038	3.898012022	0.009004408	46.92281304	0.108391698
32.43194097	×ÔÉí³µÁ¾	Road 1	279.8897619	78.71342926	0.00181294	1.090944171	0.701960802	0	296.8114	985.1426	651.438	0.8455	3.648	1039	2.88120711	0.006655588	46.97110643	0.108503256
32.4485269	×ÔÉí³µÁ¾	Road 1	280.2526336	78.7618103	0.001866548	1.089955688	0.701960802	0	297.1179	985.1514	651.4224	0.8423	3.6512	1040	2.897455273	0.006693122	47.01916343	0.108614268
32.46518798	×ÔÉí³µÁ¾	Road 1	280.6175008	78.8377739	0.001918374	1.0892483	0.701960802	0	297.5999	985.165	651.3978	0.8373	3.6562	1041	4.018031981	0.009281654	47.08610817	0.10876891
32.4819286	×ÔÉí³µÁ¾	Road 1	280.9843503	78.8894371	0.001968274	1.088448763	0.701960802	0	297.9287	985.1748	651.3811	0.8335	3.66	1042	3.01687616	0.006968984	47.13661254	0.108885575
32.49850867	×ÔÉí³µÁ¾	Road 1	281.3479042	78.93779068	0.002016108	1.088034153	0.701960802	0	298.2359	985.1836	651.3655	0.8303	3.6632	1043	2.902834529	0.006705548	47.18474174	0.108996753
32.51528044	×ÔÉí³µÁ¾	Road 1	281.7159987	79.01014252	0.002072142	1.086939931	0.701960802	0	298.697	985.1963	651.3419	0.826	3.6676	1044	3.858724399	0.008913653	47.2494594	0.109146251
32.53188947	×ÔÉí³µÁ¾	Road 1	282.0807433	79.05825577	0.00212769	1.087374687	0.701960802	0	299.0046	985.2051	651.3263	0.8228	3.6708	1045	2.893454795	0.006683881	47.29751687	0.109257264
32.54856814	×ÔÉí³µÁ¾	Road 1	282.4472407	79.10644455	0.002184221	1.08638072	0.701960802	0	299.3125	985.2139	651.3107	0.8196	3.6741	1046	2.889863029	0.006675584	47.34571594	0.109368604
32.56521529	×ÔÉí³µÁ¾	Road 1	282.8133948	79.18202362	0.002251168	1.086719036	0.694117665	0	299.7966	985.2275	651.2861	0.8146	3.68	1047	4.021091965	0.009288722	47.41265565	0.109523235
32.58187453	×ÔÉí³µÁ¾	Road 1	283.1800383	79.23028793	0.002309857	1.083181739	0.694117665	0	300.1049	985.2363	651.2704	0.8114	3.6832	1048	2.899327271	0.006697446	47.46095625	0.109634809
32.59852021	×ÔÉí³µÁ¾	Road 1	283.5466047	79.27815399	0.00236793	1.081584454	0.694117665	0	300.4134	985.2451	651.2546	0.8082	3.6864	1049	2.88613293	0.006666967	47.5089979	0.109745785
32.61520731	×ÔÉí³µÁ¾	Road 1	283.9144317	79.35332794	0.002428622	1.078824162	0.694117665	0	300.8985	985.2588	651.23	0.8033	3.6913	1050	4.005061453	0.009251692	47.57583077	0.109900169
32.6319538	×ÔÉí³µÁ¾	Road 1	284.2838056	79.4045105	0.002473559	1.079005957	0.694117665	0	301.2296	985.2686	651.2131	0.7996	3.6951	1051	3.014195209	0.006962791	47.62630794	0.110016771
32.64860571	×ÔÉí³µÁ¾	Road 1	284.6513146	79.45225983	0.002517353	1.078011274	0.694117665	0	301.5387	985.2773	651.1973	0.7964	3.6984	1052	2.886264757	0.006667272	47.67436977	0.110127794
32.66521181	×ÔÉí³µÁ¾	Road 1	285.018048	79.50335999	0.002554811	1.076575756	0.694117665	0	301.8702	985.2861	651.1805	0.7936	3.7012	1053	3.031915122	0.007003724	47.72471804	0.110244099
32.68193886	×ÔÉí³µÁ¾	Road 1	285.3878163	79.58160324	0.002582284	1.075443506	0.694117665	0	302.3788	985.3008	651.1545	0.7882	3.7074	1054	4.134401573	0.009550468	47.79387441	0.11040385
32.69858784	×ÔÉí³µÁ¾	Road 1	285.7560944	79.63257294	0.002606485	1.074436426	0.694117665	0	302.7108	985.3096	651.1377	0.7864	3.7102	1055	3.025513799	0.006988937	47.84424613	0.110520209
32.71530867	×ÔÉí³µÁ¾	Road 1	286.1261825	79.68010941	0.002629092	1.074650526	0.694117665	0	303.0209	985.3184	651.1219	0.7832	3.7134	1056	2.876787151	0.006645378	47.89234838	0.110631325
32.73188617	×ÔÉí³µÁ¾	Road 1	286.4933172	79.72763901	0.00263957	1.074044585	0.694117665	0	303.3311	985.3271	651.1061	0.7801	3.7166	1057	2.89496946	0.006687379	47.94033974	0.110742185
32.7485971	×ÔÉí³µÁ¾	Road 1	286.8637686	79.80554581	0.002648323	1.073552489	0.694117665	0	303.8412	985.3418	651.0801	0.7747	3.722	1058	4.134435803	0.009550547	48.00943001	0.110901783
32.76526184	×ÔÉí³µÁ¾	Road 1	287.2334319	79.8564949	0.00265183	1.072728395	0.694117665	0	304.1742	985.3506	651.0632	0.7719	3.7248	1059	3.030329511	0.007000061	48.05992967	0.111018438
32.78187966	×ÔÉí³µÁ¾	Road 1	287.6022733	79.90390778	0.00265183	1.072129965	0.694117665	0	304.4851	985.3594	651.0474	0.7688	3.7289	1060	2.891057931	0.006678344	48.10797275	0.111129417
32.79854917	×ÔÉí³µÁ¾	Road 1	287.9725435	79.96474457	0.00265183	1.07133162	0.694117665	0	304.7962	985.3682	651.0315	0.7657	3.7321	1061	3.443046875	0.007953438	48.16536665	0.111261997
32.81525717	×ÔÉí³µÁ¾	Road 1	288.3439357	80.02228546	0.00265183	1.071895957	0.694117665	0	305.2633	985.3809	651.0077	0.7614	3.7363	1062	3.303179822	0.007630345	48.22055616	0.111389485
32.83193657	×ÔÉí³µÁ¾	Road 1	288.7149744	80.08315659	0.00265183	1.070489526	0.694117665	0	305.5749	985.3896	650.9919	0.7583	3.7394	1063	3.447627837	0.00796402	48.27806054	0.11152232
32.84857895	×ÔÉí³µÁ¾	Road 1	289.0854553	80.14063568	0.002655339	1.071025848	0.694117665	0	306.0426	985.4023	650.9681	0.7541	3.7437	1064	3.314453071	0.007656387	48.33322094	0.11164974
32.86525762	×ÔÉí³µÁ¾	Road 1	289.4569632	80.18795242	0.002657095	1.070028186	0.694117665	0	306.3546	985.4111	650.9522	0.751	3.7478	1065	2.889067887	0.006673747	48.38140675	0.11176105
32.88202903	×ÔÉí³µÁ¾	Road 1	289.8308677	80.2589653	0.002665887	1.069921374	0.694117665	0	306.823	985.4238	650.9283	0.7468	3.752	1066	3.859735434	0.008915989	48.44613996	0.111910583
32.89861423	×ÔÉí³µÁ¾	Road 1	290.2008386	80.30624771	0.002674697	1.069333076	0.694117665	0	307.1355	985.4316	650.9124	0.7446	3.7541	1067	2.902545387	0.00670488	48.49427925	0.112021785
32.91524745	×ÔÉí³µÁ¾	Road 1	290.5720993	80.35358505	0.00269415	1.068487406	0.694117665	0	307.4482	985.4404	650.8965	0.7415	3.7572	1068	2.900658262	0.006700521	48.54252654	0.112133236
32.93339418	×ÔÉí³µÁ¾	Road 1	290.9775155	80.42761917	0.002711915	1.068692923	0.694117665	0	307.94	985.4541	650.8715	0.7368	3.762	1069	3.759887624	0.00868534	48.6107562	0.112290847
32.94887421	×ÔÉí³µÁ¾	Road 1	291.3235583	80.47490845	0.002736918	1.068256259	0.686274529	0	308.2531	985.4619	650.8555	0.7346	3.7651	1070	3.049828755	0.007045104	48.65796765	0.112399905
32.96522775	×ÔÉí³µÁ¾	Road 1	291.6893571	80.52544556	0.002772902	1.066242218	0.678431392	0	308.5665	985.4707	650.8396	0.7315	3.7682	1071	3.076161107	0.007105932	48.70827376	0.112516112
32.98191265	×ÔÉí³µÁ¾	Road 1	292.0628785	80.59243469	0.0028092	1.06138742	0.678431392	0	309.0368	985.4834	650.8157	0.7274	3.7724	1072	3.721995101	0.008597809	48.77037488	0.112659566
32.99862981	×ÔÉí³µÁ¾	Road 1	292.4373391	80.63918839	0.002842138	1.058324099	0.678431392	0	309.3506	985.4922	650.7996	0.7243	3.7755	1073	2.875632067	0.00664271	48.81844728	0.112770613
33.01520805	×ÔÉí³µÁ¾	Road 1	292.8089178	80.68912811	0.002884598	1.056079149	0.670588255	0	309.6646	985.5	650.7837	0.7222	3.7776	1074	3.027496096	0.006993516	48.86863783	0.112886553
33.03189772	×ÔÉí³µÁ¾	Road 1	293.1833169	80.7587471	0.002919992	1.052692175	0.662745118	0	310.1584	985.5137	650.7585	0.7172	3.7833	1075	3.838139517	0.008866102	48.9326951	0.113034526
33.04854926	×ÔÉí³µÁ¾	Road 1	293.5570751	80.80508881	0.002959447	1.047272325	0.662745118	0	310.4729	985.5215	650.7426	0.715	3.7854	1076	2.871357974	0.006632837	48.98050765	0.113144973
33.06524699	×ÔÉí³µÁ¾	Road 1	293.9321289	80.86416779	0.002999255	1.042553663	0.654901981	0	310.7875	985.5303	650.7264	0.7128	3.7885	1077	3.400562332	0.007855299	49.03728933	0.113276138
33.08193776	×ÔÉí³µÁ¾	Road 1	294.3073138	80.92291718	0.003033659	1.036458373	0.654901981	0	311.2823	985.543	650.7012	0.7093	3.7922	1078	3.390073564	0.00783107	49.09387226	0.113406845
33.09851966	×ÔÉí³µÁ¾	Road 1	294.6802606	80.96829758	0.003068326	1.033604741	0.654901981	0	311.5974	985.5518	650.6852	0.7064	3.7953	1079	2.844187149	0.006570072	49.14103429	0.113515789
33.11527165	×ÔÉí³µÁ¾	Road 1	295.0572586	81.01685028	0.003107152	1.031329155	0.654901981	0	311.9352	985.5605	650.668	0.7038	3.798	1080	2.958773134	0.006834766	49.19059961	0.113630285
33.13194995	×ÔÉí³µÁ¾	Road 1	295.4328233	81.06537552	0.003148272	1.027582645	0.654901981	0	312.2732	985.5693	650.6508	0.7011	3.8016	1081	2.968180041	0.006856496	49.24010382	0.11374464
33.14856301	×ÔÉí³µÁ¾	Road 1	295.8072597	81.13924484	0.003181823	1.024601817	0.654901981	0	312.7918	985.583	650.6244	0.6969	3.8059	1082	4.047537529	0.009349812	49.30734579	0.113899969
33.16518816	×ÔÉí³µÁ¾	Road 1	296.1821762	81.18416519	0.003215612	1.022358418	0.654901981	0	313.1078	985.5918	650.6083	0.6938	3.8089	1083	2.826573819	0.006529386	49.35433802	0.114008521
33.18196067	×ÔÉí³µÁ¾	Road 1	296.5607292	81.25147018	0.003241611	1.020601749	0.654901981	0	313.582	985.6035	650.5842	0.6907	3.812	1084	3.748480586	0.00865899	49.41720944	0.114153754
33.26526532	×ÔÉí³µÁ¾	Road 1	298.4466532	81.49996719	0.003273803	1.015470028	0.654901981	0	315.3469	985.6494	650.4942	0.6769	3.8267	1085	3.031667853	0.007003153	49.66976148	0.114737149
33.29861167	×ÔÉí³µÁ¾	Road 1	299.2023996	81.58876419	0.003308239	1.01491785	0.654901981	0	315.9817	985.666	650.4619	0.6718	3.8329	1086	2.811115733	0.006493677	49.76350191	0.114953689
33.31519284	×ÔÉí³µÁ¾	Road 1	299.5785673	81.67117538	0.003446308	1.013755441	0.654901981	0	316.5718	985.6807	650.4319	0.6679	3.8368	1087	4.441396615	0.010259626	49.83714545	0.115123806
33.33185758	×ÔÉí³µÁ¾	Road 1	299.9568362	81.71553268	0.003469337	1.01324439	0.654901981	0	316.8899	985.6885	650.4156	0.6659	3.8389	1088	2.814736024	0.00650204	49.8840523	0.115232161
33.34853735	×ÔÉí³µÁ¾	Road 1	300.3356663	81.76301422	0.003471435	1.012564182	0.654901981	0	317.2308	985.6973	650.3983	0.6633	3.8424	1089	2.946779005	0.00680706	49.9332039	0.115345701
33.36522775	×ÔÉí³µÁ¾	Road 1	300.715046	81.82948151	0.003471435	1.011471391	0.654901981	0	317.7084	985.71	650.374	0.6593	3.8464	1090	3.751510955	0.00866599	49.99581813	0.11549034
33.38194638	×ÔÉí³µÁ¾	Road 1	301.0952875	81.87689438	0.003471435	1.011279821	0.654901981	0	318.0498	985.7178	650.3566	0.6586	3.8481	1091	2.942882067	0.006798058	50.04501907	0.115603994
33.39858876	×ÔÉí³µÁ¾	Road 1	301.4739995	81.92116241	0.003471435	1.011115313	0.654901981	0	318.3686	985.7266	650.3403	0.6556	3.8511	1092	2.819801335	0.006513741	50.09194728	0.115712398
33.41523077	×ÔÉí³µÁ¾	Road 1	301.8530098	81.9874855	0.003471435	1.010101676	0.654901981	0	318.8472	985.7383	650.316	0.6526	3.8551	1093	3.760243892	0.008686163	50.15452532	0.115856953
33.43195013	×ÔÉí³µÁ¾	Road 1	302.2340014	82.03482971	0.003471435	1.009829044	0.647058845	0	319.1892	985.7471	650.2985	0.65	3.8576	1094	2.944983139	0.006802911	50.20376355	0.115970694
33.44849135	×ÔÉí³µÁ¾	Road 1	302.6111363	82.07897415	0.003471435	1.007537723	0.639215708	0	319.5086	985.7549	650.2822	0.648	3.8596	1095	2.83089598	0.00653937	50.25059	0.116078863
33.46517552	×ÔÉí³µÁ¾	Road 1	302.9918361	82.14487839	0.003471435	1.002729893	0.631372571	0	319.9881	985.7666	650.2578	0.645	3.8627	1096	3.741936192	0.008643873	50.3130211	0.116223079
33.48188058	×ÔÉí³µÁ¾	Road 1	303.3732152	82.18854904	0.003467239	0.997969568	0.623529434	0	320.308	985.7744	650.2415	0.643	3.8656	1097	2.795554289	0.00645773	50.35972102	0.116330956
33.49862706	×ÔÉí³µÁ¾	Road 1	303.7557563	82.23504868	0.003467239	0.991970599	0.615686297	0	320.6509	985.7832	650.2241	0.6405	3.8682	1098	2.912360508	0.006727553	50.40849281	0.116443618
33.51521813	×ÔÉí³µÁ¾	Road 1	304.1349455	82.27810135	0.003467239	0.987834871	0.607843161	0	320.9711	985.791	650.2078	0.6385	3.8702	1099	2.784571848	0.006432361	50.45469183	0.116550338
33.53178903	×ÔÉí³µÁ¾	Road 1	304.5140115	82.35140762	0.003465142	0.979867518	0.600000024	0	321.5204	985.8037	650.1797	0.6358	3.8729	1100	4.08743063	0.009441965	50.52242425	0.1167068
33.54853332	×ÔÉí³µÁ¾	Road 1	304.8972548	82.39684296	0.003465142	0.970005274	0.600000024	0	321.864	985.8125	650.1622	0.6332	3.8764	1101	2.872525502	0.006635534	50.57052263	0.116817907
33.56523288	×ÔÉí³µÁ¾	Road 1	305.2796692	82.4387764	0.003465142	0.964615703	0.592156887	0	322.1848	985.8203	650.1459	0.6312	3.8784	1102	2.729692492	0.00630559	50.61610731	0.116923208
33.58193281	×ÔÉí³µÁ¾	Road 1	305.6622862	82.48064117	0.003465142	0.960065305	0.592156887	0	322.5058	985.8281	650.1295	0.6292	3.8804	1103	2.727958024	0.006301583	50.66166402	0.117028444
33.59847439	×ÔÉí³µÁ¾	Road 1	306.0415875	82.54863968	0.003465142	0.951633513	0.592156887	0	323.0335	985.8408	650.1027	0.626	3.8835	1104	3.873386509	0.008947523	50.72573595	0.11717645
33.61579087	×ÔÉí³µÁ¾	Road 1	306.4388412	82.5868309	0.003465142	0.948140681	0.592156887	0	323.332	985.8477	650.0874	0.6246	3.8859	1105	2.516061673	0.005812102	50.76930528	0.117277095
33.63186693	×ÔÉí³µÁ¾	Road 1	306.8079129	82.64827881	0.003465142	0.944533885	0.592156887	0	323.8144	985.8594	650.0629	0.6216	3.8889	1106	3.671879536	0.008482042	50.82833461	0.117413453
33.64858738	×ÔÉí³µÁ¾	Road 1	307.1919681	82.68904495	0.003465142	0.942300379	0.592156887	0	324.1363	985.8672	650.0464	0.6196	3.8908	1107	2.684965433	0.00620227	50.87322846	0.117517158
33.66517515	×ÔÉí³µÁ¾	Road 1	307.5731624	82.7296257	0.003463046	0.940247953	0.592156887	0	324.4582	985.875	650.03	0.6186	3.8928	1108	2.692089912	0.006218728	50.91788422	0.117620313
33.68188498	×ÔÉí³µÁ¾	Road 1	307.9573506	82.77028885	0.003463046	0.937357366	0.592156887	0	324.7804	985.8828	650.0136	0.6166	3.8947	1109	2.684011486	0.006200067	50.96273359	0.117723915
33.69849877	×ÔÉí³µÁ¾	Road 1	308.3395572	82.81937714	0.003463046	0.935884714	0.592156887	0	325.1718	985.8916	649.9937	0.6149	3.8974	1110	3.05825007	0.007064558	51.01354272	0.117841284
33.71516974	×ÔÉí³µÁ¾	Road 1	308.7234	82.88862534	0.003463046	0.932471097	0.592156887	0	325.7247	985.9053	649.9655	0.6112	3.901	1111	3.918915727	0.009052695	51.07887486	0.117992201
33.73187041	×ÔÉí³µÁ¾	Road 1	309.108086	82.92301254	0.003463046	0.932184458	0.592156887	0	325.886	985.9092	649.9573	0.6102	3.902	1112	2.420191671	0.005590643	51.11929367	0.118085568
33.74850473	×ÔÉí³µÁ¾	Road 1	309.4914559	82.96894913	0.003463046	0.930685699	0.592156887	0	326.3704	985.9199	649.9326	0.6082	3.9049	1113	2.924843954	0.00675639	51.16794646	0.118197956
33.76516507	×ÔÉí³µÁ¾	Road 1	309.8756246	83.01193314	0.003463046	0.929671645	0.592156887	0	326.7165	985.9287	649.9149	0.6057	3.9074	1114	2.796041712	0.006458856	51.21452947	0.118305563
33.78181552	×ÔÉí³µÁ¾	Road 1	310.2597765	83.05764313	0.003463046	0.929287612	0.592156887	0	327.0859	985.9365	649.8961	0.6045	3.9085	1115	2.915968199	0.006735887	51.26308164	0.118417719
33.79849382	×ÔÉí³µÁ¾	Road 1	310.6447968	83.10635376	0.003463046	0.928038239	0.592156887	0	327.4787	985.9463	649.8761	0.6019	3.9112	1116	3.043350813	0.00703014	51.31383958	0.118534969
33.81521318	×ÔÉí³µÁ¾	Road 1	311.0310831	83.17487411	0.003463046	0.926908433	0.58431375	0	328.0335	985.959	649.8478	0.5992	3.9148	1117	3.891515147	0.0089894	51.37890322	0.118685266
33.83181048	×ÔÉí³µÁ¾	Road 1	311.4147326	83.21465836	0.003463046	0.924894989	0.58431375	0	328.3574	985.9668	649.8312	0.5972	3.9167	1118	2.670611927	0.006169114	51.42322815	0.118787657
33.84848731	×ÔÉí³µÁ¾	Road 1	311.8004051	83.2544426	0.003463046	0.92260313	0.58431375	0	328.6814	985.9736	649.8147	0.5963	3.9176	1119	2.663521611	0.006152735	51.46764727	0.118890265
33.86522977	×ÔÉí³µÁ¾	Road 1	312.1878848	83.31675568	0.003463046	0.920547843	0.58431375	0	329.1909	985.9854	649.7888	0.5938	3.9201	1120	3.626836455	0.008377992	51.52836941	0.119030533
33.88185089	×ÔÉí³µÁ¾	Road 1	312.5727393	83.35635452	0.003463046	0.919691026	0.58431375	0	329.5154	985.9932	649.7722	0.5918	3.923	1121	2.664143389	0.006154171	51.57265046	0.119132823
33.8984918	×ÔÉí³µÁ¾	Road 1	312.9582349	83.3959053	0.003463046	0.919114232	0.58431375	0	329.8399	986	649.7557	0.5908	3.9239	1122	2.661142742	0.00614724	51.61693431	0.119235118
33.91526175	×ÔÉí³µÁ¾	Road 1	313.3470086	83.45796432	0.003463046	0.917598128	0.58431375	0	330.3503	986.0117	649.7296	0.5883	3.9264	1123	3.617159243	0.008355638	51.67759387	0.119375242
33.93184035	×ÔÉí³µÁ¾	Road 1	313.7315285	83.49749451	0.003469337	0.916372061	0.58431375	0	330.6753	986.0195	649.7131	0.5864	3.9283	1124	2.669568017	0.006166702	51.72185158	0.119477477
33.94850143	×ÔÉí³µÁ¾	Road 1	314.1181432	83.53678436	0.003471435	0.916019917	0.58431375	0	331.0004	986.0264	649.6965	0.5864	3.9302	1125	2.651755821	0.006125556	51.76603268	0.119579535
33.96520392	×ÔÉí³µÁ¾	Road 1	314.5059146	83.57895126	0.003473535	0.915027618	0.58431375	0	331.349	986.0342	649.6787	0.5849	3.9317	1126	2.773075158	0.006405804	51.81234996	0.119686528
33.98180415	×ÔÉí³µÁ¾	Road 1	314.8915838	83.63794098	0.003477736	0.91433835	0.58431375	0	331.8372	986.0449	649.6539	0.583	3.9336	1127	3.518105765	0.008126824	51.87075132	0.119821436
33.99850518	×ÔÉí³µÁ¾	Road 1	315.2798677	83.69675217	0.003484045	0.913753867	0.58431375	0	332.3258	986.0557	649.629	0.5811	3.9354	1128	3.497134659	0.008078381	51.92915708	0.119956353
34.01516626	×ÔÉí³µÁ¾	Road 1	315.6674048	83.73610382	0.003492468	0.913097382	0.58431375	0	332.6517	986.0635	649.6124	0.5792	3.9383	1129	2.660050919	0.006144718	51.97347639	0.12005873
34.03180681	×ÔÉí³µÁ¾	Road 1	316.0546458	83.77533188	0.00351147	0.913351357	0.58431375	0	332.9778	986.0703	649.5957	0.5783	3.9392	1130	2.65789078	0.006139728	52.01770515	0.120160899
34.04858775	×ÔÉí³µÁ¾	Road 1	316.4454279	83.83412933	0.003522056	0.912270963	0.58431375	0	333.4671	986.0811	649.5707	0.5765	3.9411	1131	3.489646841	0.008061084	52.07626471	0.120296171
34.06523013	×ÔÉí³µÁ¾	Road 1	316.8331644	83.87330246	0.003541165	0.912109971	0.58431375	0	333.7936	986.0889	649.5541	0.5746	3.9429	1132	2.658069201	0.00614014	52.12050131	0.120398358
34.08187435	×ÔÉí³µÁ¾	Road 1	317.2211242	83.91235199	0.003564614	0.911756873	0.58431375	0	334.1202	986.0957	649.5375	0.5737	3.9448	1133	2.65359691	0.006129809	52.16466835	0.120500384
34.09847238	×ÔÉí³µÁ¾	Road 1	317.6081888	83.95168991	0.003583876	0.911133051	0.58431375	0	334.4469	986.1025	649.5208	0.5728	3.9457	1134	2.672035607	0.006172402	52.20901888	0.120602834
34.11516864	×ÔÉí³µÁ¾	Road 1	317.9978549	84.01865158	0.003607513	0.910674751	0.58431375	0	335.0074	986.1152	649.4922	0.5703	3.9482	1135	3.864346652	0.008926641	52.27353904	0.120751875
34.13189387	×ÔÉí³µÁ¾	Road 1	318.3883779	84.05764618	0.003637746	0.910744727	0.58431375	0	335.3346	986.1221	649.4755	0.5694	3.9491	1136	2.647035291	0.006114652	52.31781129	0.120854144
34.14845927	×ÔÉí³µÁ¾	Road 1	318.7753497	84.0968399	0.003659445	0.910356879	0.58431375	0	335.6619	986.1289	649.4589	0.5685	3.951	1137	2.673205607	0.006175105	52.36209403	0.120956437
34.16522042	×ÔÉí³µÁ¾	Road 1	319.1671792	84.15810242	0.003689967	0.910320878	0.58431375	0	336.1766	986.1396	649.4326	0.5671	3.9525	1138	3.611871265	0.008343423	52.42263313	0.121096283
34.18190789	×ÔÉí³µÁ¾	Road 1	319.5574674	84.19715881	0.003720659	0.909747422	0.58431375	0	336.5043	986.1475	649.4159	0.5653	3.9543	1139	2.657462068	0.006138737	52.46697945	0.121198723
34.19848832	×ÔÉí³µÁ¾	Road 1	319.9454319	84.23618088	0.003744893	0.909584701	0.58431375	0	336.8322	986.1543	649.3992	0.5644	3.9553	1140	2.668044313	0.006163182	52.51121678	0.121300911
34.21513474	×ÔÉí³µÁ¾	Road 1	320.3352238	84.29747772	0.003778109	0.908915222	0.58431375	0	337.3477	986.165	649.3729	0.563	3.9577	1141	3.637204397	0.008401942	52.57176319	0.121440773
34.23192228	×ÔÉí³µÁ¾	Road 1	320.7285021	84.33647919	0.003795904	0.908749521	0.58431375	0	337.676	986.1719	649.3561	0.5631	3.9586	1142	2.648813935	0.00611876	52.61623026	0.121543492
34.24869075	×ÔÉí³µÁ¾	Road 1	321.1215159	84.37556305	0.003822701	0.908776224	0.58431375	0	338.0044	986.1787	649.3394	0.5622	3.9595	1143	2.655409179	0.006133995	52.66075743	0.12164635
34.26516672	×ÔÉí³µÁ¾	Road 1	321.507941	84.43390732	0.003845128	0.908822477	0.58431375	0	338.3564	986.1865	649.3214	0.5608	3.9609	1144	3.539724497	0.008176764	52.71907781	0.12178107
34.28184796	×ÔÉí³µÁ¾	Road 1	321.8993867	84.47842255	0.003863132	0.907732189	0.58431375	0	338.873	986.1973	649.295	0.5595	3.9633	1145	2.90476632	0.00671001	52.7675329	0.121893001
34.29857025	×ÔÉí³µÁ¾	Road 1	322.2919766	84.51734161	0.003881193	0.907571554	0.58431375	0	339.202	986.2041	649.2783	0.5586	3.9642	1146	2.656873965	0.006137379	52.81196193	0.121995632
34.31517817	×ÔÉí³µÁ¾	Road 1	322.6821509	84.57572708	0.00389931	0.907334089	0.58431375	0	339.6957	986.2139	649.2531	0.5578	3.965	1147	3.526421342	0.008146033	52.87052847	0.122130921
34.3318858	×ÔÉí³µÁ¾	Road 1	323.0748481	84.61462555	0.003917484	0.907172203	0.58431375	0	340.0251	986.2207	649.2363	0.557	3.9659	1148	2.660179326	0.006145014	52.91497376	0.122233589
34.3484908	×ÔÉí³µÁ¾	Road 1	323.4653122	84.65351028	0.003933431	0.907429934	0.58431375	0	340.3546	986.2275	649.2195	0.5561	3.9678	1149	2.671184699	0.006170437	52.95932877	0.122336049
34.36512255	×ÔÉí³µÁ¾	Road 1	323.8565976	84.6950592	0.003944849	0.907067776	0.58431375	0	340.7078	986.2344	649.2014	0.5557	3.9682	1150	2.78678185	0.006437466	53.00567783	0.122443116
34.38183861	×ÔÉí³µÁ¾	Road 1	324.2500731	84.73958817	0.003956289	0.906657338	0.58431375	0	341.0847	986.2422	649.1822	0.5547	3.9692	1151	2.909351859	0.006720603	53.05431073	0.122555458
34.39847586	×ÔÉí³µÁ¾	Road 1	324.6419117	84.78676758	0.003963164	0.906458974	0.58431375	0	341.4854	986.25	649.1617	0.5542	3.9708	1152	3.036714399	0.00701481	53.10483331	0.122672165
34.41518056	×ÔÉí³µÁ¾	Road 1	325.0355575	84.83393326	0.003967751	0.90585196	0.58431375	0	341.8864	986.2588	649.1413	0.5527	3.9723	1153	3.029242993	0.006997551	53.1554359	0.122789057
34.43179765	×ÔÉí³µÁ¾	Road 1	325.427356	84.88095474	0.003974639	0.90588057	0.58431375	0	342.2875	986.2666	649.1208	0.5521	3.9729	1154	3.035310533	0.007011567	53.20587392	0.122905569
34.44846972	×ÔÉí³µÁ¾	Road 1	325.8206563	84.92532578	0.003974639	0.906128049	0.58431375	0	342.6653	986.2744	649.1016	0.5512	3.9739	1155	2.913280546	0.006729678	53.25444435	0.123017766
34.46518835	×ÔÉí³µÁ¾	Road 1	326.2152737	84.97243652	0.003979235	0.905508757	0.58431375	0	343.0669	986.2822	649.0811	0.5506	3.9754	1156	3.029561431	0.006998287	53.30509445	0.123134768
34.48188315	×ÔÉí³µÁ¾	Road 1	326.6095985	85.03062973	0.003979235	0.905689955	0.58431375	0	343.5633	986.292	649.0558	0.5508	3.9762	1157	3.521885148	0.008135555	53.36389162	0.12327059
34.49858051	×ÔÉí³µÁ¾	Road 1	327.0041641	85.06948013	0.003979235	0.905298829	0.600000024	0	343.8944	986.2979	649.0389	0.551	3.9761	1158	2.671805375	0.00617187	53.40850373	0.123373644
34.51517634	×ÔÉí³µÁ¾	Road 1	327.3966113	85.13041306	0.003979235	0.909067333	0.600000024	0	344.4151	986.3086	649.0123	0.5496	3.9784	1159	3.662321791	0.008459963	53.469283	0.123514044
34.53189057	×ÔÉí³µÁ¾	Road 1	327.7920396	85.16946945	0.003979235	0.912692308	0.607843161	0	344.7466	986.3154	648.9954	0.5488	3.9793	1160	2.681933403	0.006195266	53.51410945	0.123617593
34.54853075	×ÔÉí³µÁ¾	Road 1	328.1858973	85.20867004	0.003979235	0.915038645	0.615686297	0	345.0782	986.3213	648.9785	0.549	3.9791	1161	2.697062858	0.006230215	53.55898907	0.123721265
34.56513684	×ÔÉí³µÁ¾	Road 1	328.5792339	85.27061234	0.003979235	0.92149663	0.631372571	0	345.5997	986.3311	648.9518	0.5486	3.9795	1162	3.710948227	0.00857229	53.62061342	0.123863617
34.58185254	×ÔÉí³µÁ¾	Road 1	328.975351	85.31034851	0.003979235	0.928068459	0.639215708	0	345.9318	986.3379	648.9349	0.5478	3.9812	1163	2.715690924	0.006273246	53.66600808	0.123968479
34.59848686	×ÔÉí³µÁ¾	Road 1	329.3697251	85.35044861	0.003979235	0.935429633	0.647058845	0	346.264	986.3438	648.918	0.548	3.981	1164	2.741531711	0.006332938	53.71161159	0.124073823
34.61522894	×ÔÉí³µÁ¾	Road 1	329.7669505	85.41417618	0.003979235	0.945661485	0.654901981	0	346.7864	986.3545	648.8913	0.5467	3.9822	1165	3.772989651	0.008715606	53.7747793	0.12421974
34.63210189	×ÔÉí³µÁ¾	Road 1	330.1674727	85.45514145	0.003979235	0.952593148	0.662745118	0	347.119	986.3604	648.8743	0.5468	3.983	1166	2.757204172	0.006369142	53.82130146	0.124327206
34.64913355	×ÔÉí³µÁ¾	Road 1	330.5720568	85.51735153	0.003979235	0.962555647	0.670588255	0	347.6183	986.3701	648.8488	0.5461	3.9837	1167	3.663576072	0.008462861	53.88369826	0.124471343
34.66518908	×ÔÉí³µÁ¾	Road 1	330.9536391	85.55908585	0.003979235	0.970146477	0.678431392	0	347.9513	986.376	648.8318	0.5463	3.9835	1168	2.886966534	0.006668893	53.93005003	0.124578416
34.6986146	×ÔÉí³µÁ¾	Road 1	331.7487472	85.63483658	0.003979235	0.982536793	0.678431392	0	348.5464	986.3867	648.8015	0.5463	3.9843	1169	2.642457805	0.006104078	54.01837556	0.124782448
34.7152174	×ÔÉí³µÁ¾	Road 1	332.1440524	85.71441193	0.003979235	0.989832222	0.686274529	0	349.1659	986.3984	648.7698	0.5458	3.9847	1170	4.515312925	0.010430373	54.09334237	0.124955621
34.7319954	×ÔÉí³µÁ¾	Road 1	332.5437305	85.75757446	0.003979235	0.997905731	0.701960802	0	349.4997	986.4043	648.7528	0.5469	3.9845	1171	2.873090555	0.006636839	54.14154711	0.125066974
34.74858354	×ÔÉí³µÁ¾	Road 1	332.9390865	85.80118332	0.003979235	1.005666018	0.701960802	0	349.8336	986.4111	648.7357	0.5461	3.9862	1172	2.916168835	0.00673635	54.1899209	0.125178717
34.76513868	×ÔÉí³µÁ¾	Road 1	333.3339749	85.87050018	0.003979235	1.017826915	0.709803939	0	350.3588	986.4199	648.7089	0.5468	3.9855	1173	4.073783242	0.009410439	54.25736296	0.125334508
34.78192585	×ÔÉí³µÁ¾	Road 1	333.7346057	85.91506348	0.003979235	1.023059964	0.717647076	0	350.6932	986.4268	648.6918	0.5461	3.9862	1174	2.938696467	0.006788389	54.30669536	0.125448466
34.79854697	×ÔÉí³µÁ¾	Road 1	334.1314959	85.96319733	0.003979235	1.029272676	0.717647076	0	351.0517	986.4326	648.6736	0.5468	3.9855	1175	3.119373973	0.007205754	54.35854286	0.125568234
34.81512521	×ÔÉí³µÁ¾	Road 1	334.5276741	86.03096924	0.003979235	1.039197326	0.725490212	0	351.5539	986.4414	648.6479	0.5471	3.9861	1176	4.007272591	0.0092568	54.42497637	0.125721695
34.84852104	×ÔÉí³µÁ¾	Road 1	335.3267528	86.13898544	0.003979235	1.05199194	0.725490212	0	352.344	986.4561	648.6076	0.5469	3.9864	1177	3.376199394	0.007799021	54.53772735	0.12598215
34.86733453	×ÔÉí³µÁ¾	Road 1	335.7771546	86.18529968	0.003979235	1.055728316	0.733333349	0	352.6794	986.4619	648.5905	0.5472	3.9871	1178	2.803381241	0.006475811	54.59046875	0.126103983
34.88354878	×ÔÉí³µÁ¾	Road 1	336.1656579	86.25821457	0.003979235	1.063092113	0.749019623	0	353.2069	986.4707	648.5635	0.5475	3.9863	1179	4.321703887	0.009983136	54.66054191	0.126265852
34.89849144	×ÔÉí³µÁ¾	Road 1	336.5238882	86.30518799	0.003979235	1.070952415	0.764705896	0	353.5429	986.4766	648.5464	0.5478	3.9861	1180	3.315253561	0.007658236	54.71008062	0.126380286
34.91515545	×ÔÉí³µÁ¾	Road 1	336.9236045	86.352491	0.003979235	1.080262899	0.764705896	0	353.879	986.4824	648.5292	0.548	3.9859	1181	3.089397584	0.007136508	54.76156237	0.126499209
34.93189827	×ÔÉí³µÁ¾	Road 1	337.3255445	86.42416306	0.003979235	1.09215045	0.772549033	0	354.3835	986.4912	648.5034	0.5473	3.9855	1182	4.168060001	0.009628219	54.83134745	0.126660413
34.94955784	×ÔÉí³µÁ¾	Road 1	337.749696	86.46556778	0.003979235	1.098152757	0.78039217	0	354.672	986.4961	648.4888	0.5477	3.9852	1183	2.724057215	0.006292572	54.87945314	0.126771537
34.9651724	×ÔÉí³µÁ¾	Road 1	338.124971	86.5211792	0.003979235	1.104934812	0.78039217	0	355.0328	986.5029	648.4703	0.5475	3.9855	1184	3.635077778	0.00839703	54.93621328	0.126902653
34.98182248	×ÔÉí³µÁ¾	Road 1	338.5254575	86.59126511	0.003979235	1.115385056	0.78039217	0	355.5383	986.5117	648.4445	0.5469	3.9852	1185	4.12214704	0.00952216	55.00484735	0.127061197
34.99844873	×ÔÉí³µÁ¾	Road 1	338.9255988	86.64058685	0.003979235	1.120308399	0.78039217	0	355.8755	986.5166	648.4272	0.5482	3.983	1186	3.194391881	0.007379045	55.05795812	0.127183883
35.01512154	×ÔÉí³µÁ¾	Road 1	339.3270902	86.69022446	0.003979235	1.12423265	0.78039217	0	356.213	986.5225	648.41	0.5485	3.9827	1187	3.204031541	0.007401313	55.11137832	0.127307284
35.03179068	×ÔÉí³µÁ¾	Road 1	339.7288561	86.76854324	0.003979235	1.128821254	0.78039217	0	356.7436	986.5313	648.3829	0.5494	3.9819	1188	4.496401491	0.010386687	55.18632947	0.127480421
35.04853423	×ÔÉí³µÁ¾	Road 1	340.1326481	86.81856537	0.003972342	1.131079912	0.78039217	0	357.0815	986.5371	648.3657	0.5487	3.9817	1189	3.216117155	0.007429231	55.2401787	0.127604813
35.0651132	×ÔÉí³µÁ¾	Road 1	340.5327018	86.86870422	0.00395858	1.133344769	0.78039217	0	357.4197	986.543	648.3484	0.549	3.9814	1190	3.245342715	0.007496742	55.29398313	0.127729101
35.08189964	×ÔÉí³µÁ¾	Road 1	340.93813	86.94764099	0.003944849	1.135895491	0.78039217	0	357.9514	986.5518	648.3213	0.5499	3.9805	1191	4.508045619	0.010413585	55.36965716	0.127903908
35.11520017	×ÔÉí³µÁ¾	Road 1	341.743107	87.02316513	0.003926591	1.137625098	0.78039217	0	358.4594	986.5596	648.2953	0.5504	3.9791	1192	2.681727899	0.006194791	55.45896011	0.128110198
35.13181359	×ÔÉí³µÁ¾	Road 1	342.1451874	87.12771378	0.003910662	1.139014244	0.78039217	0	359.1617	986.5713	648.2595	0.5515	3.9781	1193	5.713182944	0.013197453	55.55387565	0.128329453
35.14853478	×ÔÉí³µÁ¾	Road 1	342.5501101	87.17809296	0.003851873	1.1402601	0.772549033	0	359.501	986.5771	648.2421	0.5518	3.9778	1194	3.247283065	0.007501224	55.60817409	0.128454882
35.16512035	×ÔÉí³µÁ¾	Road 1	342.9519805	87.2284584	0.00381152	1.139065146	0.772549033	0	359.8406	986.582	648.2247	0.5522	3.9765	1195	3.266929363	0.007546607	55.66235796	0.128580047
35.18197497	×ÔÉí³µÁ¾	Road 1	343.3607406	87.30760803	0.003762584	1.136254311	0.764705896	0	360.3745	986.5908	648.1974	0.5531	3.9756	1196	4.520648199	0.010442697	55.73855176	0.128756055
35.19850775	×ÔÉí³µÁ¾	Road 1	343.7619263	87.35786362	0.003707485	1.13401413	0.764705896	0	360.7145	986.5957	648.1801	0.5544	3.9744	1197	3.273635266	0.007562097	55.79267406	0.128881077
35.21516626	×ÔÉí³µÁ¾	Road 1	344.1663953	87.40807114	0.003637746	1.13068974	0.75686276	0	361.0548	986.6016	648.1627	0.5538	3.974	1198	3.255841304	0.007520993	55.84691153	0.129006366
35.24851847	×ÔÉí³µÁ¾	Road 1	344.9770461	87.50074081	0.003573166	1.125401378	0.75686276	0	361.6871	986.6113	648.1305	0.5555	3.9713	1199	3.08050544	0.007115968	55.9496532	0.129243699
35.26634813	×ÔÉí³µÁ¾	Road 1	345.4109183	87.60346985	0.003500904	1.120447159	0.749019623	0	362.3933	986.6221	648.0944	0.5576	3.9693	1200	5.340791398	0.012337228	56.04487768	0.129463667
35.28195242	×ÔÉí³µÁ¾	Road 1	345.7908521	87.65288086	0.003340869	1.117369533	0.741176486	0	362.7345	986.6279	648.077	0.557	3.9689	1201	3.379673889	0.007807047	56.09761511	0.129585491
35.29852003	×ÔÉí³µÁ¾	Road 1	346.1945792	87.72648239	0.003249639	1.109894037	0.733333349	0	363.2466	986.6357	648.0508	0.5584	3.9674	1202	4.348894769	0.010045947	56.16966588	0.129751928
35.31515361	×ÔÉí³µÁ¾	Road 1	346.6001396	87.77526855	0.003177864	1.104307771	0.725490212	0	363.5883	986.6406	648.0333	0.5598	3.9661	1203	3.206903944	0.007407948	56.22300819	0.129875149
35.3319056	×ÔÉí³µÁ¾	Road 1	347.0088124	87.82375259	0.003103255	1.097524405	0.725490212	0	363.9301	986.6455	648.0159	0.5611	3.9648	1204	3.179100742	0.007343723	56.27626443	0.129998171
35.34852232	×ÔÉí³µÁ¾	Road 1	347.4145354	87.89958572	0.003037498	1.090142369	0.717647076	0	364.4677	986.6543	647.9884	0.561	3.9638	1205	4.448845537	0.010276833	56.35018966	0.130168938
35.36519659	×ÔÉí³µÁ¾	Road 1	347.8219004	87.95068588	0.00297457	1.083538651	0.709803939	0	364.8345	986.6592	647.9696	0.5628	3.962	1206	3.312695874	0.007652327	56.40542646	0.130296535
35.38183274	×ÔÉí³µÁ¾	Road 1	348.2285529	87.99805756	0.002908784	1.078224182	0.709803939	0	365.177	986.665	647.9521	0.5631	3.9617	1207	3.149315541	0.007274919	56.45781895	0.130417562
35.39846999	×ÔÉí³µÁ¾	Road 1	348.6355595	88.06887131	0.002856859	1.070281506	0.701960802	0	365.6912	986.6729	647.9259	0.5636	3.9601	1208	4.223129335	0.009755429	56.52808021	0.130579865
35.41515783	×ÔÉí³µÁ¾	Road 1	349.0440199	88.11553574	0.002812847	1.064951897	0.701960802	0	366.0342	986.6777	647.9083	0.5649	3.9588	1209	3.11415081	0.007193688	56.58004864	0.130699912
35.43188709	×ÔÉí³µÁ¾	Road 1	349.4537109	88.16216583	0.002767484	1.059973478	0.686274529	0	366.3773	986.6826	647.8908	0.5662	3.9574	1210	3.108803963	0.007181337	56.63205662	0.130820051
35.44845432	×ÔÉí³µÁ¾	Road 1	349.8597523	88.23131104	0.002731547	1.04994452	0.678431392	0	366.8925	986.6904	647.8645	0.5677	3.9559	1211	4.167344693	0.009626566	56.70109801	0.130979536
35.46516855	×ÔÉí³µÁ¾	Road 1	350.2696385	88.28348923	0.002699471	1.040611029	0.678431392	0	367.2852	986.6963	647.8444	0.568	3.9546	1212	3.367690363	0.007779365	56.75738636	0.131109562
35.48191247	×ÔÉí³µÁ¾	Road 1	350.6804633	88.3287529	0.002665887	1.034185052	0.662745118	0	367.629	986.7012	647.8268	0.5693	3.9523	1213	3.049988515	0.007045473	56.80845511	0.131227531
35.49846285	×ÔÉí³µÁ¾	Road 1	351.0868484	88.39594116	0.002637822	1.023767591	0.654901981	0	368.1451	986.708	647.8005	0.5718	3.9497	1214	4.087553249	0.009442248	56.87610566	0.131383804
35.51521483	×ÔÉí³µÁ¾	Road 1	351.4983911	88.44051132	0.002615165	1.015231133	0.639215708	0	368.4894	986.7139	647.7829	0.5722	3.9493	1215	3.020849202	0.006978162	56.92671087	0.131500702
35.53181799	×ÔÉí³µÁ¾	Road 1	351.9064798	88.48431244	0.002585732	1.005298138	0.607843161	0	368.8338	986.7188	647.7653	0.5735	3.948	1216	3.005026994	0.006941612	56.97660382	0.131615955
35.54850436	×ÔÉí³µÁ¾	Road 1	352.3169133	88.54894638	0.002559947	0.982947826	0.58431375	0	369.3508	986.7256	647.7388	0.575	3.9454	1217	3.951748378	0.009128539	57.04254415	0.131768277
35.56518963	×ÔÉí³µÁ¾	Road 1	352.7275145	88.59098282	0.002541147	0.96522373	0.56078434	0	369.6956	986.7305	647.7213	0.5764	3.944	1218	2.91741902	0.006739238	57.09122207	0.131880723
35.581876	×ÔÉí³µÁ¾	Road 1	353.1384273	88.65237579	0.002519048	0.939453781	0.529411793	0	370.2132	986.7383	647.6948	0.5779	3.9425	1219	3.807316304	0.008794901	57.15475236	0.132027478
35.59850445	×ÔÉí³µÁ¾	Road 1	353.5480978	88.69217377	0.002502136	0.919991553	0.505882382	0	370.5585	986.7432	647.6771	0.5793	3.9411	1220	2.823872983	0.006523147	57.201709	0.132135948
35.61514207	×ÔÉí³µÁ¾	Road 1	353.9581734	88.73098297	0.00248698	0.900506973	0.482352942	0	370.9039	986.748	647.6594	0.5807	3.9397	1221	2.778415712	0.00641814	57.24793522	0.13224273
35.63304504	×ÔÉí³µÁ¾	Road 1	354.3997289	88.78973923	0.00247691	0.866807282	0.450980395	0	371.447	986.7559	647.6317	0.5817	3.9377	1222	3.508038514	0.008103569	57.31073952	0.132387808
35.64847852	×ÔÉí³µÁ¾	Road 1	354.7805324	88.82588425	0.002468539	0.844048679	0.427450985	0	371.7928	986.7607	647.6141	0.583	3.9364	1223	2.788284747	0.006440938	57.35377246	0.132487214
35.66509744	×ÔÉí³µÁ¾	Road 1	355.1907466	88.86082077	0.002460187	0.823165834	0.403921574	0	372.1387	986.7656	647.5964	0.5844	3.935	1224	2.605181513	0.006017969	57.39706777	0.132587227
35.68196489	×ÔÉí³µÁ¾	Road 1	355.6073314	88.91122055	0.002451854	0.790725172	0.380392164	0	372.6578	986.7725	647.5698	0.587	3.9325	1225	3.286759292	0.007592414	57.45250701	0.132715291
35.69852773	×ÔÉí³µÁ¾	Road 1	356.0165415	88.94345856	0.00244354	0.769759834	0.372549027	0	373.0041	986.7773	647.5521	0.5883	3.9311	1226	2.487610611	0.005746381	57.4937089	0.132810468
35.71519174	×ÔÉí³µÁ¾	Road 1	356.4283948	88.97449493	0.002433588	0.747669339	0.349019617	0	373.3505	986.7822	647.5344	0.5887	3.9297	1227	2.423863296	0.005599124	57.53410018	0.132903771
35.73194702	×ÔÉí³µÁ¾	Road 1	356.8427306	89.02321243	0.00242036	0.949635565	0.325490206	0	373.8703	986.7891	647.5079	0.5913	3.9272	1228	3.228705964	0.007458311	57.58819806	0.133028738
35.74852635	×ÔÉí³µÁ¾	Road 1	357.2529777	89.08014221	0.002407181	1.372953057	0.309803933	0	374.2418	986.7939	647.4889	0.5932	3.9253	1229	3.635421787	0.008397824	57.64847094	0.133167968
35.76509872	×ÔÉí³µÁ¾	Road 1	357.6633482	89.1443985	0.002389137	1.383621931	0.286274523	0	374.5887	986.7988	647.4712	0.5946	3.9239	1230	3.97928844	0.009192156	57.71441718	0.133320304
35.78180965	×ÔÉí³µÁ¾	Road 1	358.0774999	89.21981964	0.002363054	0.896231353	0.270588249	0	375.1096	986.8057	647.4445	0.5972	3.9214	1231	4.472362114	0.010331156	57.7891545	0.133492947
35.79849199	×ÔÉí³µÁ¾	Road 1	358.4910975	89.25316315	0.00233716	0.764145553	0.254901975	0	375.4571	986.8105	647.4268	0.5987	3.92	1232	2.535571839	0.005857171	57.83145376	0.133590658
35.81517762	×ÔÉí³µÁ¾	Road 1	358.9050248	89.3066597	0.002309857	0.946556568	0.23137255	0	375.9785	986.8174	647.4001	0.6003	3.9174	1233	3.468323111	0.008011826	57.88932494	0.133724341
35.83180864	×ÔÉí³µÁ¾	Road 1	359.3177911	89.34862747	0.00228118	0.967098951	0.20784314	0	376.3263	986.8223	647.3823	0.6018	3.915	1234	2.942965227	0.00679825	57.93826945	0.133837402
35.84844406	×ÔÉí³µÁ¾	Road 1	359.7308447	89.38716202	0.002248024	0.836422145	0.192156866	0	376.6743	986.8271	647.3645	0.6032	3.9136	1235	2.784236538	0.006431586	57.98458639	0.133944395
35.86520814	×ÔÉí³µÁ¾	Road 1	360.1473001	89.43167038	0.002216748	0.669780254	0.176470593	0	377.1965	986.834	647.3378	0.6059	3.911	1236	3.047016697	0.007038609	58.03566682	0.13406239
35.8818014	×ÔÉí³µÁ¾	Road 1	360.5596367	89.45868988	0.002174987	0.689740002	0.160784319	0	377.5448	986.8389	647.32	0.6073	3.9096	1237	2.254470201	0.005207826	58.07307584	0.134148805
35.89846651	×ÔÉí³µÁ¾	Road 1	360.97395	89.50210648	0.002141349	0.725579679	0.152941182	0	377.8932	986.8428	647.3022	0.6088	3.9072	1238	3.010710026	0.00695474	58.12324965	0.134264707
35.9150891	×ÔÉí³µÁ¾	Road 1	361.3873422	89.52949677	0.002102046	0.642952979	0.137254909	0	378.4159	986.8496	647.2755	0.6115	3.9046	1239	2.271048489	0.005246122	58.16100035	0.134351911
35.93212663	×ÔÉí³µÁ¾	Road 1	361.8111621	89.55239639	0.002058778	0.557721198	0.137254909	0	378.7646	986.8545	647.2576	0.6129	3.9032	1240	2.036574088	0.004704486	58.19569854	0.134432064
35.94853735	×ÔÉí³µÁ¾	Road 1	362.2195251	89.58210754	0.002024887	0.529737651	0.129411772	0	379.2877	986.8613	647.231	0.6156	3.9005	1241	2.398124012	0.005539666	58.23505348	0.134522974
35.96550303	×ÔÉí³µÁ¾	Road 1	362.6417916	89.60199966	0.001987026	0.542882085	0.129411772	0	379.6365	986.8662	647.2131	0.6171	3.899	1242	1.904708659	0.004399877	58.26736817	0.13459762
35.98179169	×ÔÉí³µÁ¾	Road 1	363.0472983	89.62214584	0.00194964	0.529250324	0.137254909	0	379.9854	986.8701	647.1952	0.6195	3.8966	1243	1.954887957	0.004515791	58.29921066	0.134671177
35.9984546	×ÔÉí³µÁ¾	Road 1	363.4622081	89.6407196	0.001911316	0.493878007	0.137254909	0	380.3344	986.875	647.1774	0.621	3.8952	1244	1.86062614	0.004298046	58.33021411	0.134742795
36.01510285	×ÔÉí³µÁ¾	Road 1	363.8768856	89.66945572	0.001880462	0.46178022	0.145098045	0	380.9329	986.8828	647.1469	0.6231	3.8921	1245	2.334786514	0.005393357	58.36908421	0.134832585
36.03179288	×ÔÉí³µÁ¾	Road 1	364.292679	89.68561935	0.001844429	0.46575442	0.152941182	0	381.2821	986.8867	647.129	0.6255	3.8897	1246	1.748102865	0.004038118	58.39826011	0.134899981
36.04851444	×ÔÉí³µÁ¾	Road 1	364.7093399	89.70330734	0.001810219	0.464174747	0.160784319	0	381.6563	986.8916	647.1098	0.6274	3.8877	1247	1.817629132	0.004198723	58.4286537	0.13497019
36.06513776	×ÔÉí³µÁ¾	Road 1	365.1236627	89.72709274	0.001779122	0.445361346	0.168627456	0	382.1802	986.8984	647.0831	0.6301	3.8851	1248	2.107235378	0.004867714	58.46368295	0.135051108
36.08181497	×ÔÉí³µÁ¾	Road 1	365.5393976	89.74199295	0.001743073	0.433248609	0.176470593	0	382.5296	986.9023	647.0652	0.6326	3.8826	1249	1.690847267	0.003905857	58.49188156	0.135116246
36.09845442	×ÔÉí³µÁ¾	Road 1	365.9542833	89.76188507	0.001714063	0.428664207	0.184313729	0	382.8791	986.9072	647.0473	0.634	3.8812	1250	1.925402551	0.00444768	58.5239192	0.135190253
36.11517671	×ÔÉí³µÁ¾	Road 1	366.3713112	89.77838516	0.001681489	0.42936638	0.192156866	0	383.4034	986.9141	647.0205	0.6358	3.8785	1251	1.763759175	0.004074284	58.55341329	0.135258385
36.1319111	×ÔÉí³µÁ¾	Road 1	366.7887085	89.79298325	0.001646776	0.426522255	0.200000003	0	383.753	986.918	647.0027	0.6382	3.876	1252	1.675261215	0.003869853	58.58144777	0.135323144
36.14844461	×ÔÉí³µÁ¾	Road 1	367.2011609	89.80718994	0.001617586	0.423667014	0.20784314	0	384.1026	986.9229	646.9847	0.6397	3.8746	1253	1.66533424	0.003846922	58.60898159	0.135386747
36.16511668	×ÔÉí³µÁ¾	Road 1	367.6171783	89.83061829	0.001588742	0.422004491	0.215686277	0	384.6772	986.9297	646.9554	0.6433	3.871	1254	2.089451534	0.004826633	58.64381708	0.135467217
36.18193171	×ÔÉí³µÁ¾	Road 1	368.0368291	89.84479065	0.001556551	0.425189257	0.223529413	0	385.027	986.9346	646.9375	0.6447	3.8695	1255	1.653152133	0.003818781	58.67161489	0.13553143
36.19843407	×ÔÉí³µÁ¾	Road 1	368.4487762	89.86651611	0.001532087	0.427085787	0.223529413	0	385.5518	986.9404	646.9106	0.6484	3.8658	1256	2.021269145	0.004669132	58.70497059	0.135608482
36.21509955	×ÔÉí³µÁ¾	Road 1	368.864828	89.87362289	0.001509085	0.427327156	0.239215687	0	385.7267	986.9424	646.9017	0.6496	3.8646	1257	1.330211727	0.003072789	58.7271392	0.135659692
36.23185263	×ÔÉí³µÁ¾	Road 1	369.2831831	89.89857559	0.00148274	0.4304263	0.239215687	0	386.3267	986.9502	646.871	0.6527	3.8615	1258	2.156197772	0.004980817	58.76326216	0.135743136
36.25035565	×ÔÉí³µÁ¾	Road 1	369.7453398	89.91851578	0.001459058	0.433485925	0.239215687	0	386.8018	986.9561	646.8467	0.6545	3.8587	1259	1.83670373	0.004242786	58.79724673	0.13582164
36.26515792	×ÔÉí³µÁ¾	Road 1	370.1151224	89.93331985	0.001439127	0.43518281	0.247058824	0	387.152	986.96	646.8289	0.657	3.8563	1260	1.776713792	0.004104209	58.82354613	0.135882392
36.28283436	×ÔÉí³µÁ¾	Road 1	370.5567899	89.95043106	0.001410148	0.437431186	0.254901975	0	387.5522	986.9648	646.8083	0.6594	3.8529	1261	1.752035357	0.004047202	58.85451587	0.135953932
36.2985237	×ÔÉí³µÁ¾	Road 1	370.9488722	89.9653244	0.001392949	0.439439446	0.254901975	0	387.9025	986.9697	646.7904	0.6608	3.8514	1262	1.737702131	0.004014092	58.88177927	0.13601691
36.31509203	×ÔÉí³µÁ¾	Road 1	371.3630253	89.98795624	0.001369106	0.443965644	0.254901975	0	388.428	986.9756	646.7635	0.6645	3.8477	1263	2.0620509	0.004763338	58.91594402	0.136095831
36.33179233	×ÔÉí³µÁ¾	Road 1	371.7805484	90.00338516	0.001344422	0.444925904	0.262745112	0	388.7784	986.9805	646.7457	0.666	3.8463	1264	1.718558254	0.00396987	58.94464446	0.136162129
36.34852892	×ÔÉí³µÁ¾	Road 1	372.1990862	90.02647705	0.001318934	0.446216017	0.262745112	0	389.3041	986.9863	646.7188	0.6697	3.8426	1265	2.073503436	0.004789793	58.97934783	0.136242293
36.36518413	×ÔÉí³µÁ¾	Road 1	372.6156608	90.04199524	0.00129377	0.449626654	0.262745112	0	389.6547	986.9912	646.7009	0.6712	3.8411	1266	1.725282496	0.003985403	59.00808277	0.136308671
36.38183274	×ÔÉí³µÁ¾	Road 1	373.0321425	90.05760956	0.001263571	0.451305181	0.270588249	0	390.0053	986.9951	646.6829	0.6737	3.8387	1267	1.73031007	0.003997016	59.03689004	0.136375216
36.39848392	×ÔÉí³µÁ¾	Road 1	373.4487969	90.08104477	0.001237008	0.453197658	0.278431386	0	390.5314	987.001	646.656	0.6764	3.835	1268	2.096133936	0.004842069	59.07179314	0.136455842
36.41517982	×ÔÉí³µÁ¾	Road 1	373.8666434	90.09682388	0.00120874	0.454885095	0.278431386	0	390.8822	987.0059	646.6381	0.6779	3.8336	1269	1.736548792	0.004011428	59.10078638	0.136522817
36.43188599	×ÔÉí³µÁ¾	Road 1	374.284821	90.11280212	0.001178862	0.45632115	0.286274523	0	391.233	987.0098	646.6201	0.6803	3.8311	1270	1.745632063	0.00403241	59.1299492	0.136590183
36.44844883	×ÔÉí³µÁ¾	Road 1	374.6995208	90.13669052	0.001154511	0.46039471	0.301960796	0	391.7594	987.0156	646.5932	0.684	3.8274	1271	2.124398151	0.00490736	59.16513526	0.136671462
36.46509927	×ÔÉí³µÁ¾	Road 1	375.116489	90.15286789	0.001129505	0.463398755	0.309803933	0	392.1104	987.0205	646.5753	0.6855	3.826	1272	1.758083882	0.004061174	59.19440815	0.136739083
36.48187838	×ÔÉí³µÁ¾	Road 1	375.5367943	90.1775528	0.001103884	0.468313962	0.309803933	0	392.637	987.0264	646.5483	0.6892	3.8223	1273	2.147724105	0.004961243	59.23044504	0.136822328
36.49849804	×ÔÉí³µÁ¾	Road 1	375.9531809	90.19391556	0.001078653	0.471771061	0.31764707	0	392.9882	987.0303	646.5304	0.6917	3.8199	1274	1.768844041	0.00408603	59.25984262	0.136890236
36.51519027	×ÔÉí³µÁ¾	Road 1	376.3714639	90.21073151	0.001059509	0.473272175	0.333333343	0	393.3394	987.0352	646.5125	0.6932	3.8184	1275	1.786942736	0.004127838	59.28967069	0.136959139
36.53178243	×ÔÉí³µÁ¾	Road 1	376.7873567	90.23623352	0.001035898	0.480738819	0.349019617	0	393.8664	987.041	646.4855	0.6969	3.8147	1276	2.200243593	0.005082563	59.32617749	0.13704347
36.54847027	×ÔÉí³µÁ¾	Road 1	377.2057267	90.25328293	0.001017265	0.48640272	0.356862754	0	394.2177	987.0449	646.4675	0.6994	3.8122	1277	1.798760768	0.004155137	59.35619491	0.13711281
36.56514821	×ÔÉí³µÁ¾	Road 1	377.6239302	90.27090912	0.000996114	0.490939438	0.36470589	0	394.5692	987.0488	646.4495	0.7018	3.8098	1278	1.826500507	0.004219216	59.38665717	0.137183178
36.58184264	×ÔÉí³µÁ¾	Road 1	378.0426716	90.29768829	0.00097706	0.49824968	0.380392164	0	395.0965	987.0557	646.4225	0.7036	3.8071	1279	2.253872715	0.005206446	59.4242843	0.137270097
36.59846083	×ÔÉí³µÁ¾	Road 1	378.4595842	90.3158226	0.000959141	0.503839076	0.380392164	0	395.4482	987.0596	646.4045	0.706	3.8046	1280	1.85408558	0.004282938	59.45509585	0.137341271
36.63183174	×ÔÉí³µÁ¾	Road 1	379.2972412	90.36510315	0.000940563	0.516685367	0.380392164	0	396.3778	987.0703	646.3571	0.7121	3.7985	1281	2.155769513	0.004979828	59.52703583	0.137507453
36.64848292	×ÔÉí³µÁ¾	Road 1	379.7152973	90.3841095	0.000918762	0.5205006	0.388235301	0	396.7297	987.0742	646.339	0.7146	3.7961	1282	1.894470592	0.004376227	59.558581	0.137580322
36.66514326	×ÔÉí³µÁ¾	Road 1	380.1336724	90.40330811	0.000881214	0.523926914	0.396078438	0	397.0817	987.0791	646.321	0.7161	3.7946	1283	1.903332727	0.004396699	59.59029118	0.137653573
36.68189964	×ÔÉí³µÁ¾	Road 1	380.5545956	90.43263474	0.000859515	0.530971408	0.403921574	0	397.6097	987.085	646.294	0.7198	3.7909	1284	2.370935364	0.005476861	59.63001947	0.137745345
36.69863769	×ÔÉí³µÁ¾	Road 1	380.97515	90.452314	0.000837361	0.536322951	0.411764711	0	397.9619	987.0889	646.276	0.7223	3.7884	1285	1.922462481	0.004440888	59.66219775	0.137819677
36.71508067	×ÔÉí³µÁ¾	Road 1	381.3884279	90.48243713	0.000819594	0.543195724	0.419607848	0	398.4903	987.0947	646.249	0.726	3.7847	1286	2.436022019	0.005627211	59.7022532	0.137912205
36.73188837	×ÔÉí³µÁ¾	Road 1	381.8109748	90.50427933	0.000796561	0.548299134	0.419607848	0	398.8678	987.0996	646.2297	0.728	3.7823	1287	2.020212315	0.00466669	59.73620832	0.137990641
36.74848383	×ÔÉí³µÁ¾	Road 1	382.2282811	90.52491302	0.00077628	0.552554309	0.427450985	0	399.2203	987.1035	646.2116	0.7305	3.7797	1288	1.976649192	0.00456606	59.76901173	0.138066417
36.76507966	×ÔÉí³µÁ¾	Road 1	382.6457406	90.5561348	0.000757108	0.559597492	0.435294122	0	399.7491	987.1094	646.1846	0.7342	3.7758	1289	2.476348481	0.005720365	59.81010879	0.138161351
36.78184887	×ÔÉí³µÁ¾	Road 1	383.0676678	90.57896576	0.000733775	0.564482629	0.443137258	0	400.1269	987.1143	646.1653	0.7362	3.7738	1290	2.070110526	0.004781955	59.84482291	0.138241541
36.8000055	×ÔÉí³µÁ¾	Road 1	383.5246582	90.60965195	0.000712386	0.571714044	0.450980395	0	400.6309	987.1201	646.1395	0.7395	3.7704	1291	2.327930283	0.005377519	59.88709027	0.138339179
36.81676884	×ÔÉí³µÁ¾	Road 1	383.9466822	90.63145981	0.000689272	0.575962901	0.450980395	0	400.9837	987.124	646.1215	0.741	3.7679	1292	2.02371881	0.00467479	59.92101457	0.138417544
36.8321807	×ÔÉí³µÁ¾	Road 1	384.3347761	90.65347366	0.000661089	0.580200851	0.458823532	0	401.3366	987.1279	646.1034	0.7435	3.7654	1293	2.123968911	0.004906368	59.95374886	0.13849316
36.84852067	×ÔÉí³µÁ¾	Road 1	384.7463497	90.67730026	0.000636391	0.58486253	0.466666669	0	401.7149	987.1318	646.084	0.7464	3.7625	1294	2.147791678	0.004961399	59.98884372	0.138574229
36.86508644	×ÔÉí³µÁ¾	Road 1	385.1637661	90.71109695	0.000610997	0.592514813	0.474509805	0	402.2446	987.1377	646.0569	0.7502	3.7588	1295	2.604554964	0.006016522	60.03199019	0.138673897
36.89850317	×ÔÉí³µÁ¾	Road 1	386.0061204	90.74723511	0.000586287	0.599890351	0.474509805	0	402.7997	987.1445	646.0286	0.7534	3.7556	1296	1.853745752	0.004282153	60.0939363	0.138816993
36.91729943	×ÔÉí³µÁ¾	Road 1	386.4801536	90.79034271	0.000560383	0.606014132	0.482352942	0	403.4561	987.1523	645.995	0.7573	3.7515	1297	2.805150029	0.006479897	60.14666265	0.138938791
36.93424459	×ÔÉí³µÁ¾	Road 1	386.9076769	90.82734604	0.000513231	0.612300038	0.490196079	0	404.0117	987.1582	645.9666	0.7614	3.7473	1298	2.720140932	0.006283526	60.19275586	0.139045266
36.94908169	×ÔÉí³µÁ¾	Road 1	387.2821123	90.85119324	0.000490112	0.616984248	0.498039216	0	404.3654	987.1621	645.9485	0.7639	3.7448	1299	2.268375856	0.005239948	60.22641197	0.139123012
36.96508516	×ÔÉí³µÁ¾	Road 1	387.6861054	90.87870026	0.000469908	0.6216259	0.505882382	0	404.7698	987.167	645.9279	0.7663	3.7424	1300	2.356538634	0.005443604	60.26412477	0.139210128
36.98190459	×ÔÉí³µÁ¾	Road 1	388.1108112	90.90326157	0.000456209	0.626589835	0.513725519	0	405.1237	987.1709	645.9097	0.7688	3.7399	1301	2.15405355	0.004975864	60.30035473	0.139293819
36.99843884	×ÔÉí³µÁ¾	Road 1	388.5284605	90.93474426	0.000443843	0.631323934	0.521568656	0	405.4777	987.1748	645.8916	0.7713	3.7374	1302	2.503351395	0.005782742	60.34174576	0.139389433
37.01506069	×ÔÉí³µÁ¾	Road 1	388.9484615	90.96479187	0.000434323	0.639535844	0.529411793	0	406.0089	987.1807	645.8644	0.7751	3.7336	1303	2.428343428	0.005609473	60.38210933	0.139482673
37.03178885	×ÔÉí³µÁ¾	Road 1	389.3712747	90.99193497	0.000425458	0.644805014	0.545098066	0	406.3885	987.1855	645.845	0.777	3.7316	1304	2.283455885	0.005274783	60.42030734	0.13957091
37.04849171	×ÔÉí³µÁ¾	Road 1	389.7935839	91.0211174	0.000421328	0.651557505	0.552941203	0	406.7934	987.1895	645.8243	0.7805	3.7282	1305	2.382035015	0.005502501	60.46009415	0.139662817
37.06512456	×ÔÉí³µÁ¾	Road 1	390.2143025	91.05995407	0.000419273	0.662375093	0.568627477	0	407.3252	987.1963	645.7971	0.7833	3.7254	1306	2.845303027	0.00657265	60.50741965	0.139772139
37.08176658	×ÔÉí³µÁ¾	Road 1	390.6353754	91.08647919	0.000418248	0.669324875	0.576470613	0	407.6798	987.2002	645.7789	0.7858	3.7229	1307	2.262905314	0.005227311	60.54507896	0.139859132
37.09842912	×ÔÉí³µÁ¾	Road 1	391.0571011	91.11529083	0.000418248	0.675847709	0.58431375	0	408.0598	987.2041	645.7595	0.7887	3.7199	1308	2.370001299	0.005474703	60.5845692	0.139950355
37.11510743	×ÔÉí³µÁ¾	Road 1	391.4793507	91.142276	0.000418248	0.682439566	0.58431375	0	408.4147	987.208	645.7413	0.7913	3.7173	1309	2.283096748	0.005273953	60.62264739	0.140038315
37.13173478	×ÔÉí³µÁ¾	Road 1	391.90051	91.18550034	0.000418248	0.692476392	0.600000024	0	408.9725	987.2148	645.7128	0.7945	3.714	1310	3.057272882	0.0070623	60.67348174	0.140155743
37.14846147	×ÔÉí³µÁ¾	Road 1	392.3243151	91.21339188	0.000418248	0.697962224	0.607843161	0	409.3276	987.2188	645.6947	0.797	3.7115	1311	2.323656396	0.005367646	60.71234883	0.140245526
37.1650496	×ÔÉí³µÁ¾	Road 1	392.7447488	91.24363174	0.000418248	0.705532968	0.615686297	0	409.7082	987.2227	645.6752	0.8	3.7085	1312	2.446901858	0.005652343	60.75293836	0.140339288
37.18189323	×ÔÉí³µÁ¾	Road 1	393.1717704	91.26764374	0.000418248	0.05262224	0.631372571	0	410.2412	987.2285	645.6479	0.8038	3.7047	1313	2.134116098	0.004929808	60.7888846	0.140422323
37.19841794	×ÔÉí³µÁ¾	Road 1	393.5906277	91.250354	0.000418248	-0.318377852	0.639215708	0	410.5966	987.2324	645.6298	0.8063	3.7021	1314	1.009724976	0.002332465	60.80557002	0.140460867
37.21506766	×ÔÉí³µÁ¾	Road 1	394.0125689	91.2320961	0.000418248	-0.00730376	0.647058845	0	410.9772	987.2373	645.6102	0.8083	3.7001	1315	1.00958297	0.002332137	60.82237929	0.140499696
37.23339986	×ÔÉí³µÁ¾	Road 1	394.4772162	91.24543762	0.000418248	0.516566634	0.662745118	0	411.5101	987.2432	645.583	0.8112	3.6963	1316	1.583516512	0.003657923	60.85140864	0.140566754
37.25011922	×ÔÉí³µÁ¾	Road 1	394.9010639	91.26258316	0.000418248	0.461924583	0.670588255	0	411.84	987.2461	645.5662	0.8142	3.6932	1317	1.81853692	0.00420082	60.88181341	0.140636989
37.2651132	×ÔÉí³µÁ¾	Road 1	395.2812277	91.27594528	0.000418248	0.243435994	0.678431392	0	412.3985	987.2529	645.5376	0.8175	3.6899	1318	1.712828128	0.003956633	60.90749552	0.140696315
37.28179554	×ÔÉí³µÁ¾	Road 1	395.7042456	91.28604584	0.000418248	0.437015504	0.686274529	0	412.7793	987.2568	645.5181	0.8206	3.6869	1319	1.487621756	0.003436406	60.93231253	0.140753642
37.29863476	×ÔÉí³µÁ¾	Road 1	396.131341	91.30727005	0.000418248	0.657023609	0.694117665	0	413.1348	987.2607	645.4999	0.8231	3.6843	1320	2.004605038	0.004630638	60.96606852	0.140831618
37.31505098	×ÔÉí³µÁ¾	Road 1	396.5478389	91.33604736	0.000418248	0.735026956	0.701960802	0	413.4903	987.2646	645.4818	0.8257	3.6818	1321	2.393843071	0.005529777	61.00536637	0.140922396
37.33187261	×ÔÉí³µÁ¾	Road 1	396.9748396	91.38249207	0.000418248	0.725809276	0.701960802	0	414.0493	987.2715	645.4531	0.829	3.6785	1322	3.190638759	0.007370376	61.05903811	0.141046378
37.34839842	×ÔÉí³µÁ¾	Road 1	397.394482	91.41532059	0.000418248	0.780390739	0.709803939	0	414.4307	987.2754	645.4336	0.832	3.6754	1323	2.580078326	0.005959981	61.10167601	0.141144872
37.36509432	×ÔÉí³µÁ¾	Road 1	397.8186014	91.44937134	0.000418248	0.847397566	0.709803939	0	414.7867	987.2793	645.4154	0.8346	3.6729	1324	2.622770823	0.006058601	61.14546553	0.141246025
37.38183348	×ÔÉí³µÁ¾	Road 1	398.2439897	91.48599014	0.000418248	0.880936027	0.717647076	0	415.1428	987.2832	645.3972	0.8371	3.6703	1325	2.740782171	0.006331207	61.1913439	0.141352004
37.3984381	×ÔÉí³µÁ¾	Road 1	398.6661934	91.53673325	0.000418248	0.884263039	0.717647076	0	415.5755	987.2881	645.3751	0.8401	3.6673	1326	3.428725786	0.007920357	61.24827661	0.141483519
37.41506399	×ÔÉí³µÁ¾	Road 1	399.0891742	91.58795013	0.000418248	0.905755222	0.717647076	0	416.1103	987.2939	645.3478	0.844	3.6635	1327	3.449927314	0.007969332	61.30563472	0.141616016
37.43172543	×ÔÉí³µÁ¾	Road 1	399.513241	91.62715073	0.000418248	0.933561862	0.717647076	0	416.467	987.2979	645.3295	0.8465	3.6609	1328	2.875275779	0.006641887	61.35354096	0.14172668
37.44840741	×ÔÉí³µÁ¾	Road 1	399.938141	91.69418793	0.000418248	0.961815715	0.725490212	0	417.0533	987.3047	645.2994	0.8503	3.6571	1329	4.196381751	0.009693642	61.42354488	0.141888389
37.46506188	×ÔÉí³µÁ¾	Road 1	400.3625325	91.73566132	0.000419786	0.968366444	0.725490212	0	417.4104	987.3086	645.2812	0.8529	3.6545	1330	2.987246727	0.00690054	61.47329591	0.142003314
37.48189817	×ÔÉí³µÁ¾	Road 1	400.7917527	91.77749863	0.000420814	0.97652638	0.725490212	0	417.7677	987.3125	645.2629	0.8555	3.651	1331	2.984284834	0.006893698	61.5235402	0.142119378
37.49839137	×ÔÉí³µÁ¾	Road 1	401.2125323	91.8443367	0.000422358	0.995375395	0.725490212	0	418.3295	987.3184	645.2343	0.8599	3.6467	1332	4.229681913	0.009770565	61.59330116	0.142280526
37.51507517	×ÔÉí³µÁ¾	Road 1	401.638375	91.88755417	0.000422874	1.003884792	0.725490212	0	418.6872	987.3232	645.2159	0.8615	3.6451	1333	3.071195753	0.007094462	61.64454039	0.142398888
37.53174944	×ÔÉí³µÁ¾	Road 1	402.0641763	91.93112183	0.00042494	1.00909853	0.725490212	0	419.0451	987.3271	645.1976	0.8641	3.6426	1334	3.090363238	0.007138739	61.69606995	0.142517922
37.54840502	×ÔÉí³µÁ¾	Road 1	402.4898043	91.9968544	0.000427013	1.015900016	0.733333349	0	419.5822	987.333	645.1702	0.868	3.6387	1335	4.152077675	0.009591299	61.7652252	0.14267767
37.56510605	×ÔÉí³µÁ¾	Road 1	402.9167992	92.04112244	0.000429615	1.021701574	0.733333349	0	419.9405	987.3369	645.1519	0.8706	3.6362	1336	3.123714413	0.00721578	61.81739446	0.142798181
37.5818694	×ÔÉí³µÁ¾	Road 1	403.3456093	92.08878937	0.00043275	1.028522968	0.733333349	0	420.3246	987.3408	645.1321	0.8736	3.6331	1337	3.27861731	0.007573606	61.87235505	0.14292514
37.59841245	×ÔÉí³µÁ¾	Road 1	403.7689887	92.13333893	0.000434323	1.03333962	0.733333349	0	420.6833	987.3447	645.1139	0.8762	3.6306	1338	3.160237206	0.007300148	61.924635	0.143045907
37.61499545	×ÔÉí³µÁ¾	Road 1	404.1936426	92.18801651	0.0004359	1.035774112	0.733333349	0	421.119	987.3496	645.0916	0.8793	3.6276	1339	3.643079288	0.008415513	61.98504818	0.143185461
37.63174779	×ÔÉí³µÁ¾	Road 1	404.6228727	92.23951492	0.000436427	1.03845191	0.733333349	0	421.5294	987.3545	645.0706	0.8819	3.625	1340	3.467197458	0.008009226	62.04313189	0.143319635
37.64843856	×ÔÉí³µÁ¾	Road 1	405.0507791	92.29430923	0.000436427	1.041747928	0.733333349	0	421.9656	987.3594	645.0482	0.8849	3.622	1341	3.635534352	0.008398084	62.10381175	0.143459805
37.66501936	×ÔÉí³µÁ¾	Road 1	405.4762249	92.3722023	0.000436427	1.044383407	0.733333349	0	422.582	987.3652	645.0167	0.8902	3.6168	1342	4.76701047	0.011011794	62.1828526	0.14364239
37.68187691	×ÔÉí³µÁ¾	Road 1	405.9089842	92.41754837	0.000436427	1.04575181	0.733333349	0	422.9417	987.3701	644.9983	0.8919	3.6151	1343	3.166663678	0.007314993	62.23623479	0.143765702
37.698413	×ÔÉí³µÁ¾	Road 1	406.3337005	92.46318283	0.000436427	1.046969056	0.733333349	0	423.3017	987.374	644.9799	0.8945	3.6125	1344	3.223784489	0.007446942	62.28954355	0.143888846
37.7150891	×ÔÉí³µÁ¾	Road 1	406.7623298	92.53151779	0.000436427	1.047910213	0.733333349	0	423.8419	987.3799	644.9523	0.8985	3.6086	1345	4.29528783	0.009922115	62.36117223	0.144054308
37.73169593	×ÔÉí³µÁ¾	Road 1	407.1894033	92.58028336	0.000436427	1.049158692	0.733333349	0	424.2281	987.3838	644.9325	0.9016	3.6056	1346	3.36885643	0.007782058	62.41711824	0.144183543
37.74837423	×ÔÉí³µÁ¾	Road 1	407.6185265	92.62591782	0.000436427	1.049378395	0.733333349	0	424.5886	987.3877	644.9141	0.9042	3.603	1347	3.210098313	0.007415327	62.47065724	0.144307218
37.76508626	×ÔÉí³µÁ¾	Road 1	408.0488358	92.69452057	0.000436427	1.050076246	0.741176486	0	425.1299	987.3936	644.8864	0.9082	3.599	1348	4.308101401	0.009951714	62.54265435	0.144473532
37.78178326	×ÔÉí³µÁ¾	Road 1	408.4790005	92.74678802	0.000436427	1.051933885	0.741176486	0	425.5424	987.3984	644.8652	0.9108	3.5965	1349	3.529681045	0.008153563	62.60158943	0.144609672
37.79850262	×ÔÉí³µÁ¾	Road 1	408.9099536	92.79251175	0.000436427	1.054441094	0.749019623	0	425.9037	987.4023	644.8468	0.9135	3.5939	1350	3.214226143	0.007424862	62.65532923	0.144733811
37.81502	×ÔÉí³µÁ¾	Road 1	409.3359268	92.84175797	0.000436427	1.057107806	0.749019623	0	426.2909	987.4063	644.827	0.9166	3.5908	1351	3.41361535	0.007885451	62.71171324	0.144864058
37.8317456	×ÔÉí³µÁ¾	Road 1	409.767606	92.9142334	0.000435374	1.060493708	0.749019623	0	426.8592	987.4121	644.7979	0.9211	3.5864	1352	4.500711409	0.010396643	62.78699029	0.145037948
37.84844516	×ÔÉí³µÁ¾	Road 1	410.1988281	92.96047897	0.00043275	1.061941504	0.749019623	0	427.2211	987.416	644.7794	0.9237	3.5837	1353	3.247197888	0.007501027	62.84121709	0.145163211
37.86506738	×ÔÉí³µÁ¾	Road 1	410.6283743	93.0300499	0.000429615	1.063479662	0.749019623	0	427.7643	987.4229	644.7516	0.9258	3.5807	1354	4.387230595	0.010134503	62.9141426	0.145331669
37.8818036	×ÔÉí³µÁ¾	Road 1	411.0610814	93.0763092	0.000425458	1.064309955	0.749019623	0	428.1266	987.4268	644.7331	0.9285	3.578	1355	3.24665308	0.007499769	62.96847931	0.145457187
37.89834592	×ÔÉí³µÁ¾	Road 1	411.4889884	93.12271957	0.000422358	1.065357327	0.749019623	0	428.4891	987.4307	644.7145	0.9311	3.5753	1356	3.281535657	0.007580347	63.0227635	0.145582584
37.91505721	×ÔÉí³µÁ¾	Road 1	411.9216053	93.19570999	0.000419273	1.066256166	0.749019623	0	429.0591	987.4365	644.6854	0.9356	3.5708	1357	4.541225679	0.010490231	63.09865326	0.145757889
37.93184035	×ÔÉí³µÁ¾	Road 1	412.3562989	93.24218903	0.000414674	1.066466212	0.749019623	0	429.4221	987.4404	644.6668	0.9383	3.5682	1358	3.256224928	0.00752188	63.15330294	0.14588413
37.94855421	×ÔÉí³µÁ¾	Road 1	412.7894139	93.28868179	0.000410109	1.066265106	0.749019623	0	429.7852	987.4443	644.6482	0.941	3.5655	1359	3.267613492	0.007548187	63.20791737	0.146010289
37.96505877	×ÔÉí³µÁ¾	Road 1	413.2173183	93.33518143	0.000404074	1.067283988	0.749019623	0	430.1486	987.4482	644.6296	0.9437	3.5628	1360	3.297875059	0.007618091	63.26234734	0.146136022
37.98198706	×ÔÉí³µÁ¾	Road 1	413.6565368	93.40494461	0.000396615	1.066564918	0.749019623	0	430.6939	987.4541	644.6017	0.9478	3.5587	1361	4.351804989	0.01005267	63.33601598	0.146306197
37.9984524	×ÔÉí³µÁ¾	Road 1	414.0839713	93.45477448	0.000387298	1.067563653	0.749019623	0	431.0837	987.458	644.5818	0.9509	3.5555	1362	3.470401359	0.008016627	63.39315731	0.146438193
38.01510101	×ÔÉí³µÁ¾	Road 1	414.5164868	93.52466812	0.000377173	1.066625714	0.749019623	0	431.6298	987.4648	644.5538	0.954	3.5525	1363	4.41926305	0.010208498	63.46673191	0.146608151
38.03171334	×ÔÉí³µÁ¾	Road 1	414.9482737	93.57105103	0.000364882	1.067046523	0.749019623	0	431.994	987.4688	644.5353	0.9567	3.5498	1364	3.2849975	0.007588344	63.52130336	0.146734211
38.04847558	×ÔÉí³µÁ¾	Road 1	415.3841738	93.61753693	0.000352405	1.066854596	0.749019623	0	432.3585	987.4727	644.5166	0.9594	3.547	1365	3.271250837	0.007556589	63.57613687	0.146860876
38.06503476	×ÔÉí³µÁ¾	Road 1	415.8151137	93.68727264	0.000340215	1.066932917	0.749019623	0	432.9055	987.4785	644.4886	0.9635	3.543	1366	4.437063105	0.010249616	63.64961097	0.147030601
38.0818014	×ÔÉí³µÁ¾	Road 1	416.2516849	93.73707504	0.000327439	1.066704512	0.749019623	0	433.2964	987.4824	644.4686	0.9667	3.5398	1367	3.434609162	0.007933947	63.70719784	0.147163627
38.0983976	×ÔÉí³µÁ¾	Road 1	416.6840473	93.78683624	0.000314987	1.065870166	0.741176486	0	433.6615	987.4863	644.4499	0.9694	3.537	1368	3.458981464	0.007990247	63.76460378	0.147296235
38.11505868	×ÔÉí³µÁ¾	Road 1	417.1184073	93.85324173	0.000302442	1.063896656	0.741176486	0	434.2095	987.4922	644.4219	0.9735	3.5329	1369	4.261509638	0.009844087	63.83560511	0.147460248
38.13179673	×ÔÉí³µÁ¾	Road 1	417.5549887	93.89938431	0.000289032	1.061022639	0.733333349	0	434.575	987.4961	644.4032	0.9763	3.5302	1370	3.266813344	0.007546339	63.89028521	0.147586559
38.14846294	×ÔÉí³µÁ¾	Road 1	417.9899097	93.94551315	0.000277191	1.059157491	0.733333349	0	434.9407	987.5	644.3845	0.979	3.5275	1371	3.277248249	0.007570443	63.94490451	0.147712729
38.16514418	×ÔÉí³µÁ¾	Road 1	418.4254664	93.99808273	0.000266435	1.05643487	0.733333349	0	435.3589	987.5049	644.3631	0.9817	3.5248	1372	3.590370322	0.008293755	64.00479633	0.14785108
38.18173817	×ÔÉí³µÁ¾	Road 1	418.8590628	94.06696701	0.000255223	1.053009152	0.733333349	0	435.9081	987.5107	644.335	0.9858	3.5206	1373	4.404972776	0.010175487	64.07789244	0.148019932
38.19844067	×ÔÉí³µÁ¾	Road 1	419.2957519	94.12249603	0.000245765	1.051971793	0.733333349	0	436.2745	987.5146	644.3163	0.9886	3.5179	1374	3.735505124	0.008629017	64.1402847	0.148164058
38.21501304	×ÔÉí³µÁ¾	Road 1	419.7293095	94.18130722	0.000236543	1.049327731	0.733333349	0	436.8244	987.5205	644.2881	0.9927	3.5138	1375	3.919991035	0.009055179	64.20524824	0.148314123
38.23169538	×ÔÉí³µÁ¾	Road 1	420.1659542	94.22664642	0.000226873	1.04878962	0.733333349	0	437.1912	987.5244	644.2693	0.9955	3.511	1376	3.245455279	0.007497002	64.25939002	0.148439191
38.24841987	×ÔÉí³µÁ¾	Road 1	420.6040198	94.29502945	0.000218465	1.047011852	0.733333349	0	437.7418	987.5303	644.2412	0.9996	3.5069	1377	4.364138066	0.010081159	64.33237801	0.148607793
38.26499224	×ÔÉí³µÁ¾	Road 1	421.0383102	94.34047165	0.000210267	1.046391368	0.733333349	0	438.109	987.5342	644.2224	1.0024	3.5041	1378	3.268778011	0.007550877	64.38654941	0.148732929
38.2817149	×ÔÉí³µÁ¾	Road 1	421.4767499	94.38588638	0.000201332	1.045772076	0.733333349	0	438.4764	987.5381	644.2036	1.0051	3.5013	1379	3.248772376	0.007504664	64.44087752	0.148858427
38.29843462	×ÔÉí³µÁ¾	Road 1	421.9154287	94.45393982	0.000194492	1.045044422	0.733333349	0	439.0279	987.5439	644.1754	1.0093	3.4972	1380	4.355860874	0.010062039	64.51370632	0.149026662
38.31548791	×ÔÉí³µÁ¾	Road 1	422.3630889	94.50238266	0.000187209	1.044225454	0.733333349	0	439.4221	987.5479	644.1552	1.0126	3.4939	1381	3.354366084	0.007748586	64.5709093	0.1491588
38.33170436	×ÔÉí³µÁ¾	Road 1	422.7889854	94.54768066	0.000179235	1.044014335	0.725490212	0	439.7902	987.5518	644.1364	1.0153	3.4911	1382	3.317200879	0.007662734	64.6247025	0.149283063
38.34837203	×ÔÉí³µÁ¾	Road 1	423.226942	94.59291687	0.000172057	1.04175055	0.725490212	0	440.1584	987.5566	644.1176	1.0171	3.4893	1383	3.253811544	0.007516305	64.67893598	0.149408342
38.36507086	×ÔÉí³µÁ¾	Road 1	423.6660609	94.66698532	0.000165901	1.038074136	0.725490212	0	440.7637	987.5625	644.0866	1.0223	3.4842	1384	4.663643276	0.010773016	64.75681337	0.149588239
38.38181662	×ÔÉí³µÁ¾	Road 1	424.1066377	94.71513977	0.000158817	1.03701663	0.709803939	0	441.1588	987.5674	644.0664	1.0246	3.4819	1385	3.389846001	0.007830544	64.81357889	0.149719367
38.39840768	×ÔÉí³µÁ¾	Road 1	424.5433953	94.76953583	0.000153508	1.032916069	0.701960802	0	441.5277	987.5713	644.0475	1.0273	3.4791	1386	3.721515294	0.0085967	64.87532279	0.149861996
38.41511274	×ÔÉí³µÁ¾	Road 1	424.9834192	94.82670593	0.000148318	1.023639202	0.678431392	0	442.0813	987.5771	644.0192	1.0315	3.4749	1387	3.841254403	0.008873298	64.93949119	0.150010225
38.43173387	×ÔÉí³µÁ¾	Road 1	425.4214357	94.87080231	0.000143497	1.013282061	0.662745118	0	442.4507	987.5811	644.0002	1.0342	3.4721	1388	3.212523142	0.007420928	64.99288693	0.150133569
38.44847045	×ÔÉí³µÁ¾	Road 1	425.8627969	94.93575211	0.000139273	0.995933592	0.639215708	0	443.005	987.5869	643.9719	1.0384	3.4679	1389	4.221158287	0.009750876	65.06353471	0.150296765
38.46501057	×ÔÉí³µÁ¾	Road 1	426.2991716	94.97811813	0.000136342	0.981832564	0.607843161	0	443.3747	987.5908	643.953	1.0412	3.4651	1390	3.140652239	0.007254907	65.11548145	0.150416762
38.48184026	×ÔÉí³µÁ¾	Road 1	426.7433818	95.01996918	0.000133931	0.966405034	0.58431375	0	443.7446	987.5947	643.9341	1.0439	3.4623	1391	3.08060523	0.007116198	65.16732709	0.150536526
38.49835691	×ÔÉí³µÁ¾	Road 1	427.1796088	95.0808197	0.000132023	0.935188591	0.53725493	0	444.2998	987.6006	643.9057	1.0481	3.458	1392	4.065798227	0.009391994	65.23448047	0.15069165
38.51500956	×ÔÉí³µÁ¾	Road 1	427.6196083	95.11993103	0.000130604	0.909880221	0.490196079	0	444.6701	987.6045	643.8867	1.0509	3.4552	1393	2.970076165	0.006860876	65.2839401	0.150805902
38.53181689	×ÔÉí³µÁ¾	Road 1	428.0639573	95.17609177	0.000129663	0.868452013	0.435294122	0	445.2258	987.6104	643.8583	1.0551	3.451	1394	3.787815639	0.008749854	65.34760318	0.150952963
38.54852672	×ÔÉí³µÁ¾	Road 1	428.5058928	95.21149521	0.000128961	0.835194707	0.380392164	0	445.5965	987.6143	643.8394	1.0579	3.4482	1395	2.783524874	0.006429942	65.3941154	0.151060407
38.5650661	×ÔÉí³µÁ¾	Road 1	428.9434967	95.24989243	0.000128961	1.058493018	0.34117648	0	445.9673	987.6182	643.8203	1.0607	3.4453	1396	2.951435644	0.006817816	65.44293032	0.151173169
38.58172901	×ÔÉí³µÁ¾	Road 1	429.3847979	95.34255524	0.000128961	1.545495272	0.294117659	0	446.5239	987.624	643.7919	1.0649	3.4411	1397	5.621319858	0.012985249	65.53659786	0.151389541
38.59843517	×ÔÉí³µÁ¾	Road 1	429.8275572	95.40990829	0.000128961	1.35885036	0.262745112	0	446.8953	987.6289	643.7729	1.0667	3.4392	1398	4.36510339	0.010083389	65.60952199	0.151557996
38.61548406	×ÔÉí³µÁ¾	Road 1	430.2797071	95.47478943	0.000128494	0.987475455	0.239215687	0	447.2669	987.6328	643.7539	1.0695	3.4364	1399	4.181473779	0.009659204	65.68081149	0.151722675
38.63171114	×ÔÉí³µÁ¾	Road 1	430.7102386	95.51403809	0.000128494	0.83472532	0.215686277	0	447.8246	987.6387	643.7253	1.0737	3.4322	1400	3.038956052	0.007019988	65.73012486	0.151836588
38.64836745	×ÔÉí³µÁ¾	Road 1	431.1523346	95.55210571	0.000128494	0.956133485	0.200000003	0	448.1966	987.6426	643.7063	1.0765	3.4294	1401	2.930060674	0.00676844	65.77892886	0.151949326
38.66511503	×ÔÉí³µÁ¾	Road 1	431.5970487	95.59414215	0.000128261	0.980113387	0.184313729	0	448.5687	987.6465	643.6873	1.0793	3.4266	1402	3.116620957	0.007199394	65.83112473	0.152069898
38.68189817	×ÔÉí³µÁ¾	Road 1	432.0429776	95.65217743	0.000127564	0.766691387	0.168627456	0	449.1538	987.6523	643.6573	1.0841	3.4218	1403	3.901518819	0.009012508	65.89660447	0.152221156
38.69839833	×ÔÉí³µÁ¾	Road 1	432.4815174	95.68049469	0.000126638	0.674316049	0.152941182	0	449.5263	987.6563	643.6383	1.0869	3.419	1404	2.463027707	0.005689594	65.93724481	0.152315036
38.71500589	×ÔÉí³µÁ¾	Road 1	432.9230432	95.70900421	0.000125258	0.679700196	0.137254909	0	449.9256	987.6611	643.6179	1.0892	3.4166	1405	2.464066296	0.005691993	65.97816694	0.152409566
38.73172598	×ÔÉí³µÁ¾	Road 1	433.3677479	95.74927597	0.00012366	0.658106863	0.121568628	0	450.4847	987.667	643.5892	1.0935	3.4126	1406	3.037311929	0.007016191	66.02895108	0.152526877
38.74837093	×ÔÉí³µÁ¾	Road 1	433.8105636	95.77299271	0.000122527	0.582572043	0.113725491	0	450.8576	987.6709	643.5702	1.0963	3.4097	1407	2.224066573	0.005137594	66.06597055	0.152612392
38.76507013	×ÔÉí³µÁ¾	Road 1	434.254958	95.80219574	0.000120506	0.502901137	0.105882354	0	451.417	987.6768	643.5416	1.1005	3.4054	1408	2.492748357	0.005758249	66.10759745	0.15270855
38.78172534	×ÔÉí³µÁ¾	Road 1	434.6982645	95.82006226	0.000118507	0.498855472	0.098039217	0	451.7901	987.6807	643.5225	1.1033	3.4025	1409	1.933483361	0.004466347	66.13980002	0.152782938
38.79840145	×ÔÉí³µÁ¾	Road 1	435.1422089	95.83772278	0.000116312	0.496798605	0.082352944	0	452.1632	987.6846	643.5034	1.1062	3.3997	1410	1.922442497	0.004440842	66.17185888	0.152856994
38.81507279	×ÔÉí³µÁ¾	Road 1	435.5861482	95.8640007	0.000114144	0.455379963	0.082352944	0	452.7497	987.6914	643.4734	1.1099	3.3958	1411	2.351267311	0.005431427	66.21105765	0.152947543
38.83171554	×ÔÉí³µÁ¾	Road 1	436.0293948	95.87885284	0.000111154	0.426157057	0.074509807	0	453.123	987.6953	643.4543	1.1128	3.3929	1412	1.785101952	0.004123586	66.24076666	0.153016171
38.84835609	×ÔÉí³µÁ¾	Road 1	436.4726494	95.89326553	0.000108217	0.408118635	0.074509807	0	453.5231	987.6992	643.4338	1.1162	3.3896	1413	1.763541306	0.00407378	66.27011295	0.153083961
38.86511027	×ÔÉí³µÁ¾	Road 1	436.9189911	95.90620193	0.000105537	0.39536503	0.074509807	0	453.8965	987.7031	643.4147	1.1192	3.3867	1414	1.685849748	0.003894313	66.29835799	0.153149207
38.8817083	×ÔÉí³µÁ¾	Road 1	437.3612591	95.92494736	0.0001027	0.374931633	0.074509807	0	454.4834	987.71	643.3848	1.1235	3.3829	1415	1.982223058	0.004578935	66.33125898	0.153225208
38.89842399	×ÔÉí³µÁ¾	Road 1	437.8067144	95.93613281	0.000100705	0.36383456	0.082352944	0	454.8569	987.7139	643.3656	1.1263	3.38	1416	1.600922306	0.003698131	66.35801951	0.153287025
38.91521263	×ÔÉí³µÁ¾	Road 1	438.254188	95.95208359	9.82E-05	0.353618175	0.082352944	0	455.4173	987.7197	643.337	1.1306	3.3756	1417	1.834060747	0.00423668	66.38881089	0.153358153
38.93174285	×ÔÉí³µÁ¾	Road 1	438.6948215	95.96249313	9.56E-05	0.349272758	0.082352944	0	455.7909	987.7236	643.3178	1.1334	3.3727	1418	1.568583812	0.003623429	66.41473992	0.153418049
38.94839842	×ÔÉí³µÁ¾	Road 1	439.1388429	95.97247009	9.39E-05	0.344998538	0.090196081	0	456.1646	987.7275	643.2987	1.1362	3.3699	1419	1.543245695	0.003564898	66.44044357	0.153477425
38.96508333	×ÔÉí³µÁ¾	Road 1	439.5837174	95.98786469	9.22E-05	0.337867826	0.090196081	0	456.7519	987.7344	643.2687	1.14	3.366	1420	1.811885181	0.004185455	66.4706747	0.153547259
38.98468492	×ÔÉí³µÁ¾	Road 1	440.1064351	96.00159073	9.06E-05	0.335220754	0.098039217	0	457.2858	987.7393	643.2413	1.1447	3.3612	1421	1.627596561	0.003759748	66.50257818	0.153620956
38.99957113	×ÔÉí³µÁ¾	Road 1	440.5034458	96.01088104	8.91E-05	0.332893699	0.098039217	0	457.6597	987.7441	643.2222	1.1466	3.3593	1422	1.564547247	0.003614104	66.52586836	0.153674756
39.01501487	×ÔÉí³µÁ¾	Road 1	440.9153684	96.02086487	8.73E-05	0.331525326	0.105882354	0	458.0602	987.748	643.2017	1.1499	3.3559	1423	1.583243388	0.003657292	66.55031957	0.153731238
39.03172324	×ÔÉí³µÁ¾	Road 1	441.3610646	96.03013458	8.62E-05	0.330556154	0.113725491	0	458.4341	987.752	643.1826	1.1527	3.353	1424	1.507297598	0.003481857	66.57550404	0.153789414
39.0484151	×ÔÉí³µÁ¾	Road 1	441.8063637	96.03937683	8.48E-05	0.330106765	0.121568628	0	458.808	987.7559	643.1635	1.1555	3.3502	1425	1.506503254	0.003480023	66.6006504	0.153847502
39.06503659	×ÔÉí³µÁ¾	Road 1	442.2498497	96.05335693	8.36E-05	0.330685973	0.137254909	0	459.369	987.7617	643.1348	1.1598	3.3458	1426	1.745208614	0.004031432	66.62965836	0.153914511
39.0816896	×ÔÉí³µÁ¾	Road 1	442.6942194	96.06255112	8.20E-05	0.332653522	0.152941182	0	459.7431	987.7656	643.1156	1.1626	3.3429	1427	1.505470957	0.003477638	66.65472899	0.153972424
39.09843279	×ÔÉí³µÁ¾	Road 1	443.1410615	96.07678528	8.03E-05	0.337008476	0.168627456	0	460.3042	987.7715	643.0869	1.1669	3.3386	1428	1.753082511	0.004049621	66.68408117	0.154040228
39.11510156	×ÔÉí³µÁ¾	Road 1	443.5859631	96.08659744	7.84E-05	0.341163397	0.192156866	0	460.6783	987.7764	643.0678	1.1688	3.3367	1429	1.536121753	0.003548441	66.70968644	0.154099376
39.13170509	×ÔÉí³µÁ¾	Road 1	444.0291694	96.0966156	7.63E-05	0.345297754	0.215686277	0	461.0525	987.7803	643.0486	1.1717	3.3338	1430	1.548473799	0.003576974	66.73539657	0.154158766
39.14833318	×ÔÉí³µÁ¾	Road 1	444.4731021	96.11193466	7.43E-05	0.356564015	0.239215687	0	461.6138	987.7861	643.02	1.176	3.3295	1431	1.812685545	0.004187304	66.76553806	0.154228393
39.16511009	×ÔÉí³µÁ¾	Road 1	444.9210577	96.122612	7.22E-05	0.365573257	0.270588249	0	461.988	987.79	643.0009	1.1789	3.3266	1432	1.576266991	0.003641177	66.79198295	0.154289481
39.18180049	×ÔÉí³µÁ¾	Road 1	445.3667833	96.1398262	6.95E-05	0.375680149	0.294117659	0	462.5495	987.7959	642.972	1.1833	3.3222	1433	1.904590021	0.004399603	66.82377132	0.154362912
39.19832044	×ÔÉí³µÁ¾	Road 1	445.8080119	96.1517807	6.72E-05	0.391939789	0.31764707	0	462.9239	987.7998	642.9529	1.1862	3.3193	1434	1.649112167	0.003809449	66.85101457	0.154425844
39.21498592	×ÔÉí³µÁ¾	Road 1	446.2531865	96.16459351	6.50E-05	0.404404163	0.356862754	0	463.2983	987.8037	642.9338	1.1891	3.3164	1435	1.686836418	0.003896592	66.8791265	0.154490782
39.23178738	×ÔÉí³µÁ¾	Road 1	446.7020883	96.18483582	6.24E-05	0.427395493	0.380392164	0	463.86	987.8096	642.905	1.1934	3.3121	1436	2.049456277	0.004734244	66.91356038	0.154570324
39.24838505	×ÔÉí³µÁ¾	Road 1	447.145613	96.19963303	6.05E-05	0.443155736	0.403921574	0	464.2345	987.8145	642.8859	1.1953	3.3102	1437	1.789334982	0.004133364	66.94325915	0.154638929
39.2650003	×ÔÉí³µÁ¾	Road 1	447.5896782	96.21484909	5.83E-05	0.457327515	0.427450985	0	464.6092	987.8184	642.8667	1.1982	3.3073	1438	1.809743292	0.004180507	66.9733285	0.154708389
39.28163829	×ÔÉí³µÁ¾	Road 1	448.0344618	96.23888168	5.65E-05	0.466666907	0.450980395	0	465.1712	987.8242	642.838	1.2026	3.3029	1439	2.249707959	0.005196825	67.01075911	0.154794854
39.29838844	×ÔÉí³µÁ¾	Road 1	448.4823204	96.25532684	5.50E-05	0.480549097	0.474509805	0	465.5459	987.8281	642.8188	1.2055	3.3	1440	1.865272703	0.00430878	67.04200271	0.154867026
39.31498903	×ÔÉí³µÁ¾	Road 1	448.9263003	96.28133698	5.37E-05	0.501832485	0.490196079	0	466.1082	987.834	642.79	1.2098	3.2957	1441	2.35236785	0.00543397	67.08105341	0.154957233
39.35099694	×ÔÉí³µÁ¾	Road 1	449.889809	96.32970428	5.30E-05	0.536449611	0.521568656	0	467.0725	987.8447	642.7407	1.2166	3.289	1442	2.167170317	0.005006163	67.15908869	0.155137495
39.36671267	×ÔÉí³µÁ¾	Road 1	450.3104214	96.34964447	5.23E-05	0.5489434	0.545098066	0	467.4476	987.8486	642.7215	1.2195	3.2861	1443	2.105748382	0.004864279	67.19218206	0.155213941
39.38172461	×ÔÉí³µÁ¾	Road 1	450.7122841	96.3703331	5.22E-05	0.561218023	0.592156887	0	467.8228	987.8525	642.7023	1.2224	3.2832	1444	2.197184297	0.005075496	67.22516606	0.155290134
39.3983538	×ÔÉí³µÁ¾	Road 1	451.1575376	96.39152298	5.22E-05	0.578277349	0.607843161	0	468.1981	987.8564	642.6831	1.2253	3.2804	1445	2.111069193	0.00487657	67.26027142	0.155371227
39.41500608	×ÔÉí³µÁ¾	Road 1	451.6035655	96.42526474	5.22E-05	0.607061446	0.623529434	0	468.7612	987.8623	642.6543	1.2297	3.276	1446	2.738166587	0.006325165	67.30586813	0.155476555
39.43192961	×ÔÉí³µÁ¾	Road 1	452.05697	96.44890594	5.22E-05	0.623749793	0.639215708	0	469.1367	987.8662	642.635	1.2326	3.2732	1447	2.214379951	0.005115218	67.34334326	0.155563123
39.44832933	×ÔÉí³µÁ¾	Road 1	452.4964521	96.47330933	5.22E-05	0.637901485	0.654901981	0	469.5123	987.8701	642.6158	1.2355	3.2703	1448	2.290796587	0.00529174	67.38091169	0.155649906
39.46498967	×ÔÉí³µÁ¾	Road 1	452.9430649	96.50497742	5.22E-05	0.305068076	0.662745118	0	470.0759	987.877	642.587	1.2389	3.2669	1449	2.635594757	0.006088224	67.4248216	0.155751338
39.48217639	×ÔÉí³µÁ¾	Road 1	453.4037417	96.49524078	5.22E-05	-0.306616873	0.670588255	0	470.4516	987.8809	642.5679	1.2419	3.2641	1450	1.050518539	0.002426698	67.44287657	0.155793045
39.49835141	×ÔÉí³µÁ¾	Road 1	453.8371424	96.45998154	5.22E-05	-0.10672652	0.678431392	0	471.0151	987.8867	642.539	1.2462	3.2597	1451	1.050244301	0.002426064	67.45986429	0.155832287
39.51492782	×ÔÉí³µÁ¾	Road 1	454.2812971	96.45984421	5.22E-05	0.324644357	0.678431392	0	471.3907	987.8906	642.5198	1.2492	3.2569	1452	1.050243233	0.002426062	67.47727355	0.155872502
39.53161602	×ÔÉí³µÁ¾	Road 1	454.7285093	96.473172	5.22E-05	0.439260513	0.678431392	0	471.7663	987.8945	642.5005	1.2521	3.254	1453	1.716138252	0.003964279	67.50591281	0.155938659
39.54836214	×ÔÉí³µÁ¾	Road 1	455.1773406	96.48760529	5.22E-05	0.225168079	0.678431392	0	472.3298	987.9004	642.4717	1.2564	3.2497	1454	1.76908564	0.004086588	67.53553813	0.156007093
39.56496823	×ÔÉí³µÁ¾	Road 1	455.6224315	96.49031754	5.22E-05	0.219255418	0.678431392	0	472.7055	987.9043	642.4525	1.2594	3.2468	1455	1.186672643	0.002741214	67.55524412	0.156052614
39.58166816	×ÔÉí³µÁ¾	Road 1	456.0700832	96.5001709	5.22E-05	0.44220683	0.678431392	0	473.1081	987.9092	642.4319	1.2618	3.2444	1456	1.542583643	0.003563368	67.58100516	0.156112122
39.59834573	×ÔÉí³µÁ¾	Road 1	456.5172913	96.5337822	5.19E-05	0.676843286	0.678431392	0	473.6718	987.915	642.4031	1.2662	3.2401	1457	2.731824031	0.006310514	67.62656536	0.156217366
39.61545511	×ÔÉí³µÁ¾	Road 1	456.9762063	96.56074677	5.19E-05	0.682008624	0.678431392	0	474.0477	987.9189	642.3839	1.2691	3.2372	1458	2.36598741	0.005465431	67.66704592	0.156310876
39.63159128	×ÔÉí³µÁ¾	Road 1	457.4091461	96.58942795	5.19E-05	0.684903562	0.678431392	0	474.4506	987.9229	642.3633	1.2725	3.2338	1459	2.534707466	0.005855174	67.70794639	0.156405356
39.64827948	×ÔÉí³µÁ¾	Road 1	457.857029	96.6178688	5.19E-05	0.74217099	0.678431392	0	474.8268	987.9277	642.344	1.2745	3.2319	1460	2.474258642	0.005715537	67.74923731	0.156500738
39.66494532	×ÔÉí³µÁ¾	Road 1	458.3044827	96.654776	5.19E-05	0.821861863	0.678431392	0	475.2568	987.9316	642.322	1.2784	3.228	1461	2.901186434	0.006701741	67.79758803	0.156612428
39.68161519	×ÔÉí³µÁ¾	Road 1	458.7523256	96.71545486	5.19E-05	0.86205101	0.678431392	0	475.9022	987.9385	642.289	1.2833	3.2232	1462	4.093660867	0.009456357	67.86582884	0.156770065
39.69830633	×ÔÉí³µÁ¾	Road 1	459.2009061	96.75135956	5.19E-05	0.858555377	0.678431392	0	476.2789	987.9424	642.2697	1.2862	3.2203	1463	2.850780495	0.006585303	67.9134116	0.156879981
39.71495421	×ÔÉí³µÁ¾	Road 1	459.6484899	96.78718185	5.19E-05	0.865738511	0.678431392	0	476.6557	987.9473	642.2505	1.2882	3.2183	1464	2.852260619	0.006588722	67.96089569	0.156989669
39.73160502	×ÔÉí³µÁ¾	Road 1	460.0963354	96.82672577	5.19E-05	0.886040509	0.678431392	0	477.0595	987.9512	642.2297	1.2916	3.2149	1465	3.039940856	0.007022263	68.01151318	0.157106595
39.74833941	×ÔÉí³µÁ¾	Road 1	460.5466419	96.87258682	5.19E-05	0.904258788	0.678431392	0	477.5175	987.9561	642.2064	1.295	3.2115	1466	3.347199323	0.00773203	68.06752651	0.157235986
39.76497409	×ÔÉí³µÁ¾	Road 1	460.9945562	96.93551102	5.19E-05	0.91140151	0.678431392	0	478.1374	987.9629	642.1747	1.2994	3.207	1467	4.221744919	0.009752231	68.13775391	0.157398212
39.78160291	×ÔÉí³µÁ¾	Road 1	461.4424913	96.97419662	5.19E-05	0.914775014	0.678431392	0	478.5149	987.9668	642.1553	1.3024	3.2041	1468	3.003507371	0.006938102	68.18769869	0.157513584
39.79838642	×ÔÉí³µÁ¾	Road 1	461.8947739	97.01572495	5.19E-05	0.922735691	0.678431392	0	478.8925	987.9707	642.136	1.3054	3.2011	1469	3.128617212	0.007227106	68.24020786	0.15763488
39.81500278	×ÔÉí³µÁ¾	Road 1	462.3428374	97.07474213	5.19E-05	0.932463467	0.678431392	0	479.4863	987.9775	642.1056	1.3093	3.1972	1470	4.033747167	0.009317956	68.30723404	0.157789711
39.83170821	×ÔÉí³µÁ¾	Road 1	462.7934871	97.11447144	5.19E-05	0.934581399	0.678431392	0	479.8644	987.9814	642.0863	1.3123	3.1942	1471	3.050879579	0.007047532	68.3582003	0.157907443
39.84828424	×ÔÉí³µÁ¾	Road 1	463.2409195	97.17381821	5.19E-05	0.936736345	0.678431392	0	480.4318	987.9873	642.0573	1.3167	3.1898	1472	4.06149943	0.009382064	68.42552386	0.15806296
39.86493616	×ÔÉí³µÁ¾	Road 1	463.6905857	97.2139389	5.19E-05	0.940382957	0.670588255	0	480.8102	987.9912	642.0378	1.3197	3.1868	1473	3.079855685	0.007114467	68.47680934	0.15818143
39.88160933	×ÔÉí³µÁ¾	Road 1	464.1410105	97.25379181	5.19E-05	0.941671968	0.662745118	0	481.1889	987.9951	642.0186	1.3227	3.1838	1474	3.064920532	0.007079966	68.52791129	0.158299475
39.89828397	×ÔÉí³µÁ¾	Road 1	464.5917524	97.31370163	5.19E-05	0.938874781	0.647058845	0	481.7571	988.001	641.9894	1.3271	3.1794	1475	4.077495913	0.009419016	68.59590207	0.158456534
39.91505354	×ÔÉí³µÁ¾	Road 1	465.0452455	97.35338974	5.19E-05	0.933263659	0.639215708	0	482.1361	988.0059	641.9701	1.3291	3.1774	1476	3.047929952	0.007040718	68.64701456	0.158574604
39.93168163	×ÔÉí³µÁ¾	Road 1	465.4951855	97.41254425	5.19E-05	0.928030193	0.615686297	0	482.7049	988.0117	641.941	1.3336	3.1729	1477	4.051582899	0.009359156	68.71438464	0.158730229
39.94829139	×ÔÉí³µÁ¾	Road 1	465.9448092	97.45144958	5.19E-05	0.915803611	0.592156887	0	483.0842	988.0156	641.9216	1.3366	3.1699	1478	3.030198848	0.006999759	68.76471551	0.158846493
39.98171068	×ÔÉí³µÁ¾	Road 1	466.8503436	97.54617233	5.19E-05	0.886641264	0.576470613	0	484.0334	988.0254	641.873	1.3441	3.1624	1479	3.446885334	0.007962305	68.87990797	0.159112587
39.99842161	×ÔÉí³µÁ¾	Road 1	467.3033291	97.58571625	5.19E-05	0.875546873	0.53725493	0	484.4404	988.0303	641.8522	1.3466	3.1599	1480	3.054218036	0.007055244	68.93094679	0.159230487
40.01502	×ÔÉí³µÁ¾	Road 1	467.7534907	97.63483887	5.19E-05	0.855920315	0.466666669	0	484.9562	988.0352	641.8258	1.3511	3.1554	1481	3.555838431	0.008213987	68.989968	0.159366826
40.03173863	×ÔÉí³µÁ¾	Road 1	468.2070753	97.66978912	5.19E-05	0.828313112	0.419607848	0	485.3364	988.04	641.8063	1.3531	3.1534	1482	2.823843862	0.006523079	69.03717879	0.159475883
40.04833703	×ÔÉí³µÁ¾	Road 1	468.657563	97.70555649	5.19E-05	0.964053988	0.380392164	0	485.7168	988.0439	641.7869	1.3561	3.1504	1483	2.879103485	0.006650729	69.08496729	0.159586274
40.06502816	×ÔÉí³µÁ¾	Road 1	469.1109784	97.79416809	5.23E-05	1.569786191	0.349019617	0	486.2877	988.0498	641.7577	1.3606	3.1459	1484	5.545326672	0.012809705	69.17752508	0.159800083
40.0817127	×ÔÉí³µÁ¾	Road 1	469.5645428	97.86497498	5.24E-05	1.472078323	0.309803933	0	486.6687	988.0537	641.7382	1.3636	3.1429	1485	4.649106638	0.010739436	69.25509327	0.159979265
40.09836937	×ÔÉí³µÁ¾	Road 1	470.017612	97.92163696	5.27E-05	1.089277864	0.278431386	0	487.0498	988.0576	641.7187	1.3666	3.1399	1486	3.939471178	0.009100178	69.32071177	0.160130844
40.11691748	×ÔÉí³µÁ¾	Road 1	470.5224201	97.97814102	5.30E-05	0.829412818	0.254901975	0	487.6219	988.0645	641.6895	1.3702	3.1363	1487	3.640729553	0.008410085	69.38824042	0.160286835
40.1319012	×ÔÉí³µÁ¾	Road 1	470.9303856	98.01812439	5.32E-05	0.95318687	0.215686277	0	488.0308	988.0684	641.6685	1.3737	3.1328	1488	3.322270721	0.007674445	69.43802038	0.160401827
40.14831412	×ÔÉí³µÁ¾	Road 1	471.3774582	98.06065521	5.37E-05	1.001886606	0.176470593	0	488.4125	988.0723	641.649	1.3767	3.1298	1489	3.258184679	0.007526407	69.4914967	0.160525357
40.16502614	×ÔÉí³µÁ¾	Road 1	471.8329478	98.11871109	5.44E-05	0.808438063	0.160784319	0	488.9854	988.0781	641.6197	1.3813	3.1252	1490	4.007929183	0.009258316	69.55847732	0.160680083
40.18163187	×ÔÉí³µÁ¾	Road 1	472.2856771	98.14838791	5.50E-05	0.686810195	0.129411772	0	489.3676	988.083	641.6001	1.3833	3.1231	1491	2.578995166	0.005957479	69.60130341	0.160779011
40.19838642	×ÔÉí³µÁ¾	Road 1	472.7426026	98.17823639	5.57E-05	0.667354643	0.113725491	0	489.8044	988.0869	641.5778	1.3874	3.1191	1492	2.574912113	0.005948047	69.6444449	0.160878668
40.21498885	×ÔÉí³µÁ¾	Road 1	473.1955591	98.21715546	5.61E-05	0.644834042	0.098039217	0	490.3779	988.0938	641.5485	1.3909	3.1155	1493	3.053233486	0.007052969	69.69513599	0.160995764
40.23270011	×ÔÉí³µÁ¾	Road 1	473.6788812	98.24031601	5.65E-05	0.574210465	0.082352944	0	490.7604	988.0977	641.5288	1.3939	3.1125	1494	2.17416307	0.005022317	69.73364316	0.161084716
40.24830844	×ÔÉí³µÁ¾	Road 1	474.1049011	98.25981674	5.73E-05	0.507344782	0.06666667	0	491.143	988.1016	641.5093	1.3969	3.1094	1495	2.125059919	0.004908888	69.76681179	0.161161335
40.26499151	×ÔÉí³µÁ¾	Road 1	474.5603731	98.28521576	5.79E-05	0.475944161	0.050980393	0	491.717	988.1074	641.4799	1.4014	3.1049	1496	2.357403392	0.005445602	69.80614051	0.161252185
40.28159283	×ÔÉí³µÁ¾	Road 1	475.0136888	98.30156479	5.83E-05	0.470511377	0.043137256	0	492.0997	988.1123	641.4603	1.4035	3.1028	1497	1.901107286	0.004391558	69.83770142	0.16132509
40.2983987	×ÔÉí³µÁ¾	Road 1	475.4726968	98.32452621	5.87E-05	0.448418617	0.027450981	0	492.6739	988.1182	641.431	1.408	3.0982	1498	2.225558924	0.005141041	69.87510386	0.16141149
40.31500039	×ÔÉí³µÁ¾	Road 1	475.9261889	98.33764801	5.91E-05	0.391170263	0.019607844	0	493.0568	988.1221	641.4114	1.411	3.0952	1499	1.736500991	0.004011317	69.90393272	0.161478085
40.33170436	×ÔÉí³µÁ¾	Road 1	476.3825272	98.34897766	5.97E-05	0.362347126	0.011764706	0	493.4397	988.126	641.3918	1.414	3.0921	1500	1.641377467	0.003791582	69.93135023	0.161541419
40.34895632	×ÔÉí³µÁ¾	Road 1	476.8539145	98.36528549	6.05E-05	0.346156955	0	0	494.0416	988.1328	641.361	1.4181	3.088	1501	1.868545975	0.004316341	69.96358632	0.161615884
40.3649554	×ÔÉí³µÁ¾	Road 1	477.2911105	98.37477493	6.09E-05	0.338207364	0	0	494.4246	988.1367	641.3414	1.4211	3.085	1502	1.569358851	0.003625219	69.98869462	0.161673885
40.38161354	×ÔÉí³µÁ¾	Road 1	477.7463587	98.38392105	6.14E-05	0.323654354	0	0	494.8076	988.1406	641.3218	1.4241	3.0819	1503	1.532004302	0.00353893	70.01421496	0.161732837
40.39827829	×ÔÉí³µÁ¾	Road 1	478.2018349	98.3942276	6.19E-05	0.223370239	0	0.011764706	495.3823	988.1465	641.2924	1.4286	3.0774	1504	1.591153805	0.003675565	70.04073113	0.161794089
40.41497712	×ÔÉí³µÁ¾	Road 1	478.6582489	98.39551849	6.22E-05	0.142671332	0	0.011764706	495.7654	988.1514	641.2728	1.4306	3.0753	1505	1.131032442	0.002612685	70.05961805	0.161837718
40.43163453	×ÔÉí³µÁ¾	Road 1	479.1135289	98.39512024	6.27E-05	0.145907655	0	0.011764706	496.1759	988.1553	641.2518	1.4342	3.0717	1506	1.06529538	0.002460832	70.07736312	0.161878709
40.448322	×ÔÉí³µÁ¾	Road 1	479.5696404	98.39726944	6.28E-05	0.206012011	0	0.011764706	496.7506	988.1611	641.2224	1.4387	3.0673	1507	1.174828148	0.002713853	70.09696802	0.161923996
40.46493616	×ÔÉí³µÁ¾	Road 1	480.0237616	98.40020828	6.31E-05	0.197552845	0	0.011764706	497.1338	988.166	641.2029	1.4407	3.0654	1508	1.215753221	0.00280839	70.11716674	0.161970655
40.48165038	×ÔÉí³µÁ¾	Road 1	480.4806248	98.40164337	6.32E-05	0.16430445	0	0.011764706	497.5169	988.1699	641.1832	1.4437	3.0624	1509	1.138359885	0.002629611	70.13619355	0.162014607
40.49827224	×ÔÉí³µÁ¾	Road 1	480.934964	98.40182877	6.35E-05	0.147405401	0	0.011764706	497.9274	988.1738	641.1622	1.4472	3.059	1510	1.074832454	0.002482863	70.15405926	0.162055877
40.51500223	×ÔÉí³µÁ¾	Road 1	481.3922597	98.40200729	6.35E-05	0.159879759	0	0.011764706	498.3653	988.1787	641.1398	1.4503	3.0561	1511	1.074423532	0.002481918	70.17203435	0.162097399
40.53159512	×ÔÉí³µÁ¾	Road 1	481.8458151	98.40351791	6.40E-05	0.172683775	0	0.011764706	498.9401	988.1846	641.1104	1.4548	3.0514	1512	1.142780728	0.002639823	70.19099639	0.162141202
40.54830349	×ÔÉí³µÁ¾	Road 1	482.3025317	98.40461655	6.41E-05	0.16366522	0	0.011764706	499.3232	988.1885	641.0908	1.4578	3.0483	1513	1.121286354	0.002590171	70.20973125	0.162184479
40.56497959	×ÔÉí³µÁ¾	Road 1	482.7583685	98.40500793	6.44E-05	0.153278261	0	0.011764706	499.9253	988.1953	641.06	1.4619	3.0439	1514	1.08533144	0.002507116	70.22783035	0.162226288
40.58165203	×ÔÉí³µÁ¾	Road 1	483.214106	98.40522766	6.44E-05	0.155625269	0	0.011764706	500.3085	988.1992	641.0403	1.4649	3.0408	1515	1.076581631	0.002486904	70.2457796	0.162267751
40.59834243	×ÔÉí³µÁ¾	Road 1	483.6703367	98.40568085	6.44E-05	0.159819841	0	0.011764706	500.6917	988.2031	641.0208	1.468	3.0377	1516	1.088468475	0.002514362	70.26394657	0.162309717
40.61498115	×ÔÉí³µÁ¾	Road 1	484.1251584	98.40652542	6.44E-05	0.159570187	0	0.011764706	501.2938	988.21	640.99	1.4722	3.0338	1517	1.108551191	0.002560753	70.28239144	0.162352324
40.63161767	×ÔÉí³µÁ¾	Road 1	484.5799216	98.40684814	6.44E-05	0.154426798	0	0.011764706	501.6769	988.2139	640.9704	1.4753	3.0308	1518	1.081883622	0.002499151	70.30039022	0.162393901
40.64834766	×ÔÉí³µÁ¾	Road 1	485.0372408	98.40707474	6.44E-05	0.154126972	0	0.011764706	502.0601	988.2178	640.9508	1.4784	3.0277	1519	1.076906694	0.002487654	70.31840685	0.16243552
40.66492149	×ÔÉí³µÁ¾	Road 1	485.4902931	98.40741119	6.44E-05	0.156713769	0	0.011764706	502.498	988.2227	640.9284	1.4814	3.0246	1520	1.082655146	0.002500933	70.3363506	0.16247697
40.68165002	×ÔÉí³µÁ¾	Road 1	485.9475764	98.40796051	6.44E-05	0.156583831	0	0.011764706	502.9359	988.2275	640.9059	1.4844	3.0215	1521	1.093321138	0.002525572	70.35464025	0.162519219
40.69833125	×ÔÉí³µÁ¾	Road 1	486.4035691	98.40838623	6.44E-05	0.155714914	0	0.011764706	503.5107	988.2334	640.8766	1.4889	3.0169	1522	1.087102581	0.002511207	70.37277447	0.162561109
40.71494944	×ÔÉí³µÁ¾	Road 1	486.8578402	98.40880508	6.44E-05	0.154676229	0	0.011764706	503.8939	988.2373	640.8569	1.4919	3.0138	1523	1.08683688	0.002510593	70.39083573	0.162602831
40.73159549	×ÔÉí³µÁ¾	Road 1	487.3128746	98.40916214	6.44E-05	0.155814886	0	0.011764706	504.3044	988.2422	640.836	1.4944	3.0112	1524	1.083646599	0.002503224	70.40887416	0.162644499
40.74824264	×ÔÉí³µÁ¾	Road 1	487.7679407	98.40953293	6.44E-05	0.156214148	0	0.011764706	504.8792	988.248	640.8065	1.4993	3.0066	1525	1.084349917	0.002504848	70.42692549	0.162686198
40.76499939	×ÔÉí³µÁ¾	Road 1	488.2260045	98.40988312	6.44E-05	0.156154424	0	0.011764706	505.2624	988.252	640.787	1.5026	3.0035	1526	1.083183335	0.002502154	70.44507612	0.162728126
40.78160438	×ÔÉí³µÁ¾	Road 1	488.6799223	98.4103981	6.44E-05	0.15621458	0	0.011764706	505.8646	988.2588	640.7562	1.5067	2.9994	1527	1.091790151	0.002522035	70.46320529	0.162770004
40.79828049	×ÔÉí³µÁ¾	Road 1	489.1357855	98.41073456	6.44E-05	0.155754864	0	0.011764706	506.2477	988.2627	640.7366	1.5097	2.9963	1528	1.082575698	0.00250075	70.48125844	0.162811707
40.81497382	×ÔÉí³µÁ¾	Road 1	489.5921217	98.41116028	6.44E-05	0.155065805	0	0.011764706	506.6309	988.2666	640.7169	1.5127	2.9933	1529	1.087109041	0.002511222	70.49940591	0.162853628
40.83160301	×ÔÉí³µÁ¾	Road 1	490.046706	98.4115036	6.40E-05	0.155305713	0	0.011764706	507.2331	988.2734	640.6862	1.5167	2.9893	1530	1.082981399	0.002501687	70.51741501	0.162895229
40.84828278	×ÔÉí³µÁ¾	Road 1	490.5026743	98.41177826	6.35E-05	0.154845998	0	0.011764706	507.6163	988.2773	640.6665	1.5197	2.9863	1531	1.079429261	0.002493482	70.53541965	0.162936819
40.86493909	×ÔÉí³µÁ¾	Road 1	490.958003	98.41214218	6.28E-05	0.153508142	0	0.011764706	508.1911	988.2832	640.6371	1.5242	2.9817	1532	1.08400969	0.002504062	70.55347525	0.162978528
40.88157194	×ÔÉí³µÁ¾	Road 1	491.4126912	98.41233444	6.19E-05	0.153058514	0	0.011764706	508.5742	988.2881	640.6176	1.5263	2.9797	1533	1.075260004	0.002483851	70.57135989	0.163019841
40.89980921	×ÔÉí³µÁ¾	Road 1	491.9112397	98.4124649	6.12E-05	0.152608871	0	0.011764706	509.149	988.2939	640.5881	1.5308	2.9752	1534	1.071514283	0.002475198	70.59090138	0.163064982
40.91547912	×ÔÉí³µÁ¾	Road 1	492.3396059	98.41271896	6.04E-05	0.151710182	0	0.011764706	509.5322	988.2979	640.5685	1.5338	2.9722	1535	1.079221219	0.002493001	70.60781268	0.163104047
40.93158449	×ÔÉí³µÁ¾	Road 1	492.779877	98.41282883	5.91E-05	0.150821254	0	0.011764706	509.9154	988.3018	640.549	1.5367	2.9691	1536	1.071234691	0.002474552	70.62506532	0.163143901
40.94834711	×ÔÉí³µÁ¾	Road 1	493.2381151	98.41289749	5.79E-05	0.150811076	0	0.011764706	510.2986	988.3057	640.5293	1.5398	2.9661	1537	1.068917468	0.002469199	70.64298317	0.163185291
40.96492168	×ÔÉí³µÁ¾	Road 1	493.6912136	98.41308289	5.65E-05	0.149682745	0	0.011764706	510.8734	988.3125	640.4999	1.5434	2.9626	1538	1.074948134	0.00248313	70.66079997	0.163226448
40.98169345	×ÔÉí³µÁ¾	Road 1	494.1497032	98.41309662	5.50E-05	0.149622783	0	0.011764706	511.2566	988.3164	640.4803	1.5465	2.9595	1539	1.066131581	0.002462764	70.67868089	0.163267753
40.99834427	×ÔÉí³µÁ¾	Road 1	494.6048853	98.41295929	5.40E-05	0.149023727	0	0.011764706	511.6398	988.3203	640.4607	1.5495	2.9565	1540	1.065434128	0.002461153	70.69642124	0.163308733
41.01490894	×ÔÉí³µÁ¾	Road 1	495.0577128	98.41299362	5.30E-05	0.148114622	0	0.011764706	512.242	988.3271	640.4299	1.5536	2.9525	1541	1.067197122	0.002465225	70.71409901	0.163349569
41.03159531	×ÔÉí³µÁ¾	Road 1	495.5138662	98.41279449	5.15E-05	0.147625521	0	0.011764706	512.6525	988.3311	640.4089	1.5572	2.949	1542	1.065432846	0.00246115	70.73187721	0.163390636
41.04834106	×ÔÉí³µÁ¾	Road 1	495.9716424	98.41267776	5.07E-05	0.146826088	0	0.011764706	513.0358	988.335	640.3893	1.5602	2.946	1543	1.065431938	0.002461148	70.74971867	0.16343185
41.06495338	×ÔÉí³µÁ¾	Road 1	496.4257711	98.4126709	5.04E-05	0.146486789	0	0.011764706	513.4189	988.3389	640.3697	1.5633	2.9429	1544	1.065431885	0.002461148	70.76741797	0.163472736
41.08156424	×ÔÉí³µÁ¾	Road 1	496.8798588	98.4124855	5.00E-05	0.145687729	0	0.011764706	513.8842	988.3447	640.3459	1.5659	2.9404	1545	1.065430443	0.002461144	70.78511569	0.163513617
41.0982825	×ÔÉí³µÁ¾	Road 1	497.3368809	98.41214218	5.00E-05	0.145827949	0	0.011764706	514.3495	988.3496	640.3221	1.5694	2.9369	1546	1.065427773	0.002461138	70.80292778	0.163554763
41.11489776	×ÔÉí³µÁ¾	Road 1	497.7910867	98.41201172	5.00E-05	0.14478907	0	0.011764706	514.7875	988.3535	640.2997	1.5735	2.9329	1547	1.065426758	0.002461136	70.82063012	0.163595656
41.13162335	×ÔÉí³µÁ¾	Road 1	498.2483069	98.41162033	5.00E-05	0.144539073	0	0.011764706	515.2528	988.3584	640.2759	1.5771	2.9293	1548	1.065423714	0.002461129	70.83844996	0.163636819
41.14828039	×ÔÉí³µÁ¾	Road 1	498.7036518	98.41131821	5.00E-05	0.144499138	0	0.011764706	515.7181	988.3643	640.2521	1.5797	2.9268	1549	1.065421364	0.002461123	70.85619674	0.163677814
41.16497409	×ÔÉí³µÁ¾	Road 1	499.1599966	98.41084442	5.00E-05	0.14341034	0	0.011764706	516.3476	988.3701	640.2199	1.5852	2.9213	1550	1.065417679	0.002461115	70.8739825	0.1637189
41.18164287	×ÔÉí³µÁ¾	Road 1	499.6156585	98.4105423	5.00E-05	0.143650234	0	0.011764706	516.7582	988.375	640.1989	1.5878	2.9187	1551	1.065415329	0.002461109	70.89174167	0.163759923
41.1983296	×ÔÉí³µÁ¾	Road 1	500.0718106	98.4103569	5.00E-05	0.142501697	0	0.011764706	517.1414	988.3789	640.1793	1.5909	2.9156	1552	1.065413887	0.002461106	70.90951995	0.163800991
41.21499031	×ÔÉí³µÁ¾	Road 1	500.5272491	98.40987625	5.00E-05	0.142511457	0	0.011764706	517.7161	988.3848	640.1498	1.5954	2.911	1553	1.065410149	0.002461097	70.92727044	0.163841995
41.23158541	×ÔÉí³µÁ¾	Road 1	500.9808917	98.4093956	5.00E-05	0.142252028	0	0.011764706	518.0993	988.3896	640.1302	1.5975	2.909	1554	1.06540641	0.002461089	70.94495096	0.163882837
41.24833336	×ÔÉí³µÁ¾	Road 1	501.4387116	98.40915527	5.00E-05	0.142072231	0	0.011764706	518.5099	988.3936	640.1093	1.6011	2.9054	1555	1.065404541	0.002461084	70.9627943	0.163924055
41.26492076	×ÔÉí³µÁ¾	Road 1	501.8921404	98.40865402	5.00E-05	0.142251626	0	0.011764706	518.8931	988.3975	640.0896	1.6041	2.9024	1556	1.065400642	0.002461075	70.98046653	0.163964878
41.28161006	×ÔÉí³µÁ¾	Road 1	502.3483522	98.40811157	5.00E-05	0.141862348	0	0.011764706	519.4678	988.4033	640.0602	1.6087	2.8978	1557	1.065396423	0.002461066	70.99824725	0.164005951
41.29831916	×ÔÉí³µÁ¾	Road 1	502.8051039	98.40783005	5.00E-05	0.142022118	0	0.011764706	519.8784	988.4082	640.0392	1.6113	2.8952	1558	1.065394234	0.002461061	71.01604902	0.164047073
41.31495641	×ÔÉí³µÁ¾	Road 1	503.2598891	98.40730133	5.00E-05	0.140973628	0	0.011764706	520.2615	988.4121	640.0197	1.6143	2.8921	1559	1.065390121	0.002461051	71.03377418	0.164088018
41.3315724	×ÔÉí³µÁ¾	Road 1	503.7140909	98.40679321	5.00E-05	0.141822293	0	0.011764706	520.7268	988.417	639.9958	1.6179	2.8886	1560	1.065386169	0.002461042	71.05147663	0.164128911
41.34825034	×ÔÉí³µÁ¾	Road 1	504.1699838	98.40631943	5.00E-05	0.140973851	0	0.011764706	521.1921	988.4219	639.972	1.6215	2.885	1561	1.065382484	0.002461034	71.06924501	0.164169956
41.36489492	×ÔÉí³µÁ¾	Road 1	504.6249627	98.40583191	5.00E-05	0.141373128	0	0.011764706	521.63	988.4268	639.9496	1.6245	2.8819	1562	1.065378693	0.002461025	71.0869778	0.164210919
41.38179572	×ÔÉí³µÁ¾	Road 1	505.0869422	98.40516586	5.00E-05	0.140534118	0	0.011764706	522.2321	988.4336	639.9188	1.6287	2.8778	1563	1.065373512	0.002461013	71.10498347	0.164252512
41.39822623	×ÔÉí³µÁ¾	Road 1	505.5360645	98.40472641	5.00E-05	0.140923336	0	0.011764706	522.6153	988.4375	639.8992	1.6317	2.8748	1564	1.065370094	0.002461005	71.12248804	0.164292947
41.41494926	×ÔÉí³µÁ¾	Road 1	505.9931805	98.40430756	5.00E-05	0.140544146	0	0.011764706	522.9985	988.4414	639.8796	1.6348	2.8717	1565	1.065366837	0.002460997	71.1403042	0.164334103
41.43161364	×ÔÉí³µÁ¾	Road 1	506.4486909	98.40376511	5.00E-05	0.140523955	0	0.011764706	523.4637	988.4463	639.8558	1.6383	2.8682	1566	1.065362617	0.002460988	71.1580578	0.164375114
41.4483165	×ÔÉí³µÁ¾	Road 1	506.9052498	98.40300293	5.00E-05	0.140484229	0	0.011764706	524.1205	988.4531	639.8222	1.6434	2.8631	1567	1.065356689	0.002460974	71.17585231	0.164416219
41.4649116	×ÔÉí³µÁ¾	Road 1	507.3588619	98.40277634	5.00E-05	0.140084565	0	0.011764706	524.3121	988.4551	639.8124	1.645	2.8615	1568	1.065354927	0.00246097	71.19353198	0.164457059
41.48158367	×ÔÉí³µÁ¾	Road 1	507.8145763	98.40239182	5.00E-05	0.14007479	0	0.011764706	524.8322	988.4609	639.7858	1.6485	2.8579	1569	1.065351936	0.002460963	71.2112936	0.164498088
41.49824475	×ÔÉí³µÁ¾	Road 1	508.2699865	98.40160904	5.00E-05	0.139694989	0	0.011764706	525.2974	988.4658	639.762	1.6521	2.8544	1570	1.065345848	0.002460949	71.22904341	0.16453909
41.51489666	×ÔÉí³µÁ¾	Road 1	508.7251438	98.40108032	5.00E-05	0.140494004	0	0.011764706	525.7353	988.4707	639.7396	1.6552	2.8513	1571	1.065341736	0.002460939	71.24678339	0.16458007
41.53164241	×ÔÉí³µÁ¾	Road 1	509.182864	98.40064774	5.00E-05	0.139465302	0	0.011764706	526.2005	988.4756	639.7158	1.6587	2.8477	1572	1.065338371	0.002460932	71.26462328	0.16462128
41.54830495	×ÔÉí³µÁ¾	Road 1	509.6383071	98.40007095	5.00E-05	0.140264317	0	0.011764706	526.6658	988.4805	639.692	1.6623	2.8442	1573	1.065333885	0.002460921	71.28237445	0.164662285
41.56495613	×ÔÉí³µÁ¾	Road 1	510.0934373	98.3995491	5.00E-05	0.139015809	0	0.011764706	527.1036	988.4854	639.6696	1.6654	2.8411	1574	1.065329826	0.002460912	71.30011345	0.164703262
41.58157322	×ÔÉí³µÁ¾	Road 1	510.5476324	98.39884186	5.00E-05	0.140064582	0	0.011764706	527.5689	988.4902	639.6458	1.669	2.8375	1575	1.065324326	0.002460899	71.31781604	0.164744155
41.59826399	×ÔÉí³µÁ¾	Road 1	511.0038388	98.39828568	5.00E-05	0.140114695	0	0.011764706	528.0341	988.4951	639.622	1.6725	2.834	1576	1.06532	0.002460889	71.33559705	0.164785229
41.61495916	×ÔÉí³µÁ¾	Road 1	511.4601633	98.39783249	5.00E-05	0.13983497	0	0.011764706	528.472	988.5	639.5996	1.6756	2.8309	1577	1.065316475	0.002460881	71.35338269	0.164826314
41.63159054	×ÔÉí³µÁ¾	Road 1	511.9147419	98.39726944	5.00E-05	0.13943556	0	0.011764706	528.9373	988.5049	639.5758	1.6792	2.8273	1578	1.065312096	0.002460871	71.3711003	0.164867242
41.64825675	×ÔÉí³µÁ¾	Road 1	512.3702689	98.39654846	5.00E-05	0.140524179	0	0.011764706	529.4025	988.5098	639.552	1.6827	2.8237	1579	1.065306488	0.002460858	71.38885492	0.164908255
41.66490317	×ÔÉí³µÁ¾	Road 1	512.8252525	98.39601974	5.00E-05	0.139235616	0	0.011764706	529.8403	988.5146	639.5296	1.6858	2.8207	1580	1.065302376	0.002460848	71.40658839	0.164949219
41.68162729	×ÔÉí³µÁ¾	Road 1	513.2823574	98.3954361	5.00E-05	0.140124723	0	0.011764706	530.3056	988.5195	639.5058	1.6893	2.8171	1581	1.065297836	0.002460838	71.42440456	0.164990375
41.69832246	×ÔÉí³µÁ¾	Road 1	513.738668	98.39484558	5.00E-05	0.139235824	0	0.011764706	530.7708	988.5244	639.482	1.6929	2.8135	1582	1.065293243	0.002460827	71.44218981	0.165031458
41.71489409	×ÔÉí³µÁ¾	Road 1	514.1915999	98.39431686	5.00E-05	0.139225632	0	0.011764706	531.2087	988.5293	639.4596	1.6959	2.8105	1583	1.065289131	0.002460818	71.45984339	0.165072238
41.73161602	×ÔÉí³µÁ¾	Road 1	514.6486358	98.39352722	5.00E-05	0.140294284	0	0.011764706	531.6739	988.5342	639.4358	1.6994	2.8069	1584	1.06528299	0.002460804	71.47765698	0.165113388
41.74830239	×ÔÉí³µÁ¾	Road 1	515.1046974	98.39298477	5.00E-05	0.139295533	0	0.011764706	532.2485	988.54	639.4064	1.7039	2.8023	1585	1.06527877	0.002460794	71.49543261	0.165154449
41.76488612	×ÔÉí³µÁ¾	Road 1	515.5579516	98.39251785	5.00E-05	0.139645234	0	0.011764706	532.6317	988.5439	639.3868	1.707	2.7993	1586	1.065275139	0.002460786	71.51309885	0.165195258
41.78161611	×ÔÉí³µÁ¾	Road 1	516.0151997	98.39175568	5.00E-05	0.139685005	0	0.011764706	533.2337	988.5508	639.356	1.711	2.7952	1587	1.065269211	0.002460772	71.53092079	0.165236427
41.79831824	×ÔÉí³µÁ¾	Road 1	516.4716846	98.39137115	5.00E-05	0.13946569	0	0.011764706	533.6168	988.5547	639.3364	1.714	2.7921	1588	1.06526622	0.002460765	71.54871301	0.165277527
41.81496465	×ÔÉí³µÁ¾	Road 1	516.926644	98.39078064	5.00E-05	0.140094548	0	0.011764706	533.9999	988.5586	639.3168	1.717	2.7891	1589	1.065261627	0.002460754	71.56644579	0.16531849
41.83158028	×ÔÉí³µÁ¾	Road 1	517.3807598	98.39036179	5.00E-05	0.13947551	0	0.011764706	534.4104	988.5625	639.2958	1.7205	2.7855	1590	1.065258369	0.002460747	71.58414573	0.165359377
41.84823769	×ÔÉí³µÁ¾	Road 1	517.8360152	98.38979187	5.00E-05	0.139864758	0	0.011764706	534.8756	988.5684	639.272	1.7231	2.7829	1591	1.065253937	0.002460737	71.6018901	0.165400366
41.86493359	×ÔÉí³µÁ¾	Road 1	518.2923197	98.38920822	5.00E-05	0.139465302	0	0.011764706	535.3134	988.5723	639.2496	1.7271	2.7789	1592	1.065249397	0.002460726	71.6196754	0.16544145
41.88155288	×ÔÉí³µÁ¾	Road 1	518.7465278	98.38863144	5.00E-05	0.139475286	0	0.011764706	535.7786	988.5771	639.2258	1.7306	2.7753	1593	1.065244911	0.002460716	71.63737901	0.165482346
41.89820846	×ÔÉí³µÁ¾	Road 1	519.2017245	98.38795166	5.00E-05	0.139714971	0	0.011764706	536.2165	988.582	639.2034	1.7336	2.7722	1594	1.065239624	0.002460704	71.65512119	0.16552333
41.91495604	×ÔÉí³µÁ¾	Road 1	519.6594331	98.38736801	5.00E-05	0.13971518	0	0.011764706	536.6816	988.5869	639.1796	1.7372	2.7687	1595	1.065235085	0.002460693	71.67296131	0.165564541
41.93159659	×ÔÉí³µÁ¾	Road 1	520.1142137	98.38678436	5.00E-05	0.140124723	0	0.011764706	537.1469	988.5918	639.1558	1.7407	2.7652	1596	1.065230545	0.002460683	71.69068733	0.165605488
41.94826793	×ÔÉí³µÁ¾	Road 1	520.5698331	98.38621445	5.00E-05	0.139275774	0	0.011764706	537.5847	988.5967	639.1334	1.7437	2.7622	1597	1.065226112	0.002460672	71.70844607	0.16564651
41.96492607	×ÔÉí³µÁ¾	Road 1	521.0250893	98.3856514	5.00E-05	0.139734939	0	0.011764706	538.0499	988.6016	639.1096	1.7472	2.7586	1598	1.065221733	0.002460662	71.72619069	0.1656875
41.98164323	×ÔÉí³µÁ¾	Road 1	521.4819561	98.38515701	5.00E-05	0.139445335	0	0.011764706	538.515	988.6064	639.0858	1.7508	2.7551	1599	1.065217888	0.002460653	71.74399811	0.165728636
41.99822623	×ÔÉí³µÁ¾	Road 1	521.9351538	98.3845871	5.00E-05	0.139045775	0	0.011764706	538.9802	988.6113	639.062	1.7543	2.7516	1600	1.065213455	0.002460643	71.76166254	0.16576944
42.01495769	×ÔÉí³µÁ¾	Road 1	522.3924054	98.38390045	5.00E-05	0.140104637	0	0.011764706	539.6096	988.6182	639.0298	1.7588	2.7471	1601	1.065208115	0.002460631	71.77948503	0.16581061
42.03160227	×ÔÉí³µÁ¾	Road 1	522.84728	98.38328247	5.00E-05	0.139055967	0	0.011764706	539.9926	988.6221	639.0102	1.7618	2.7441	1602	1.065203308	0.00246062	71.79721489	0.165851566
42.0483187	×ÔÉí³µÁ¾	Road 1	523.3041141	98.3824379	5.00E-05	0.140134677	0	0.011764706	540.5673	988.6289	638.9808	1.7654	2.7405	1603	1.065196739	0.002460604	71.81502117	0.165892699
42.06495448	×ÔÉí³µÁ¾	Road 1	523.7587426	98.38205338	5.00E-05	0.139105693	0	0.011764706	540.9503	988.6328	638.9612	1.7685	2.7375	1604	1.065193748	0.002460598	71.83274151	0.165933633
42.08160566	×ÔÉí³µÁ¾	Road 1	524.2137891	98.38145599	5.00E-05	0.139695168	0	0.011764706	541.3334	988.6367	638.9417	1.7715	2.7345	1605	1.065189102	0.002460587	71.85047816	0.165974605
42.09822202	×ÔÉí³µÁ¾	Road 1	524.6678815	98.38092728	5.00E-05	0.139754921	0	0.011764706	541.7438	988.6406	638.9207	1.7751	2.731	1606	1.06518499	0.002460577	71.86817765	0.16601549
42.11495971	×ÔÉí³µÁ¾	Road 1	525.1252878	98.38052902	5.00E-05	0.139465511	0	0.011764706	542.1542	988.6455	638.8996	1.7777	2.7284	1607	1.065181892	0.00246057	71.88600634	0.166056675
42.13155774	×ÔÉí³µÁ¾	Road 1	525.5788706	98.37905273	5.00E-05	0.108404189	0	0.019607844	542.7836	988.6523	638.8674	1.7823	2.7239	1608	1.06517041	0.002460544	71.90368607	0.166097515
42.14823604	×ÔÉí³µÁ¾	Road 1	526.0346304	98.37541351	5.00E-05	0.048599001	0	0.019607844	543.1666	988.6563	638.8478	1.7853	2.7209	1609	1.065142105	0.002460478	71.92145083	0.166138551
42.1649642	×ÔÉí³µÁ¾	Road 1	526.491707	98.36563568	5.00E-05	-0.004644194	0	0.027450981	543.7412	988.6621	638.8184	1.7899	2.7164	1610	1.065066055	0.002460303	71.93926742	0.166179708
42.19835416	×ÔÉí³µÁ¾	Road 1	527.4038968	98.34941025	5.00E-05	0.002626642	0	0.027450981	544.5071	988.6699	638.7793	1.796	2.7103	1611	1.064939857	0.002460011	71.97482573	0.166261847
42.21490564	×ÔÉí³µÁ¾	Road 1	527.8560248	98.33930283	5.00E-05	0.021662785	0	0.027450981	545.0815	988.6768	638.7499	1.7996	2.7068	1612	1.064861244	0.002459829	71.99245075	0.166302561
42.23153299	×ÔÉí³µÁ¾	Road 1	528.3101953	98.33277283	5.00E-05	0.011545422	0	0.027450981	545.4644	988.6807	638.7303	1.8026	2.7038	1613	1.064810455	0.002459712	72.01015573	0.16634346
42.24824649	×ÔÉí³µÁ¾	Road 1	528.7666833	98.32515106	5.00E-05	-0.023081053	0	0.035294119	545.8473	988.6846	638.7107	1.8057	2.7008	1614	1.064751175	0.002459575	72.02795145	0.166384568
42.26492846	×ÔÉí³µÁ¾	Road 1	529.2222584	98.31395187	5.00E-05	-0.085493103	0	0.035294119	546.2575	988.6895	638.6897	1.8083	2.6982	1615	1.06466407	0.002459374	72.04571214	0.166425595
42.28167164	×ÔÉí³µÁ¾	Road 1	529.6794051	98.2924118	5.00E-05	-0.112978578	0	0.043137256	546.9136	988.6963	638.6561	1.8133	2.693	1616	1.064496536	0.002458987	72.0635352	0.166466766
42.29834811	×ÔÉí³µÁ¾	Road 1	530.1346655	98.27842484	5.00E-05	-0.135610506	0	0.043137256	547.2963	988.7002	638.6366	1.8164	2.6899	1617	1.064387749	0.002458736	72.08128544	0.166507769
42.31491389	×ÔÉí³µÁ¾	Road 1	530.5868038	98.25667877	5.00E-05	-0.139006034	0	0.043137256	547.8703	988.7061	638.6072	1.821	2.6853	1618	1.064218613	0.002458345	72.09891504	0.166548494
42.33156617	×ÔÉí³µÁ¾	Road 1	531.0412462	98.24437408	5.00E-05	-0.134162009	0	0.050980393	548.0616	988.708	638.5974	1.8225	2.6837	1619	1.06412291	0.002458124	72.11663511	0.166589427
42.34831045	×ÔÉí³µÁ¾	Road 1	531.4981178	98.22681656	5.00E-05	-0.204843625	0	0.050980393	548.608	988.7139	638.5695	1.8265	2.6796	1620	1.063986351	0.002457808	72.1344508	0.166630581
42.36492571	×ÔÉí³µÁ¾	Road 1	531.9513393	98.19874649	5.00E-05	-0.215939924	0	0.050980393	549.1816	988.7197	638.5402	1.8311	2.6752	1621	1.063768028	0.002457304	72.15212558	0.16667141
42.38153767	×ÔÉí³µÁ¾	Road 1	532.4043845	98.18002853	5.00E-05	-0.181373	0	0.050980393	549.5913	988.7246	638.5192	1.8337	2.6727	1622	1.063622444	0.002456968	72.16979443	0.166712225
42.3982409	×ÔÉí³µÁ¾	Road 1	532.859839	98.1628212	5.00E-05	-0.169597685	0	0.050980393	550.0009	988.7285	638.4982	1.8372	2.6693	1623	1.063488609	0.002456659	72.18755813	0.166753259
42.41494963	×ÔÉí³µÁ¾	Road 1	533.3153667	98.14630051	5.00E-05	-0.184648946	0	0.050980393	550.383	988.7324	638.4786	1.8403	2.6664	1624	1.063360115	0.002456362	72.20532552	0.166794302
42.43166825	×ÔÉí³µÁ¾	Road 1	533.7710323	98.11788025	5.00E-05	-0.201228127	0	0.050980393	551.0107	988.7393	638.4465	1.845	2.6617	1625	1.063139069	0.002455851	72.22309975	0.16683536
42.44827141	×ÔÉí³µÁ¾	Road 1	534.22347	98.10033646	5.00E-05	-0.192409351	0	0.050980393	551.3928	988.7432	638.427	1.848	2.6586	1626	1.063002617	0.002455536	72.24074895	0.16687613
42.46488264	×ÔÉí³µÁ¾	Road 1	534.6760489	98.08330765	5.00E-05	-0.183250889	0	0.050980393	551.7747	988.748	638.4075	1.8502	2.6564	1627	1.062870171	0.00245523	72.25840453	0.166916914
42.48154371	×ÔÉí³µÁ¾	Road 1	535.1298644	98.05702972	5.00E-05	-0.18468903	0	0.050980393	552.1838	988.752	638.3865	1.8537	2.6528	1628	1.062665787	0.002454758	72.27610968	0.166957813
42.4982792	×ÔÉí³µÁ¾	Road 1	535.5856271	98.03991165	5.00E-05	-0.192688823	0	0.050980393	552.7565	988.7578	638.3572	1.8582	2.6482	1629	1.062532646	0.00245445	72.29389169	0.16699889
42.51492195	×ÔÉí³µÁ¾	Road 1	536.0387823	98.02220993	5.00E-05	-0.214921042	0	0.05882353	553.1382	988.7617	638.3376	1.8611	2.6452	1630	1.062394966	0.002454132	72.31157286	0.167039733
42.53191293	×ÔÉí³µÁ¾	Road 1	536.5012709	97.99076157	5.00E-05	-0.250376612	0	0.050980393	553.7379	988.7686	638.307	1.865	2.6412	1631	1.062150368	0.002453567	72.32961983	0.167081422
42.54820305	×ÔÉí³µÁ¾	Road 1	536.9445987	97.9722702	5.00E-05	-0.183180735	0	0.050980393	554.1194	988.7725	638.2875	1.868	2.6382	1632	1.062006546	0.002453235	72.34692005	0.167121385
42.56485313	×ÔÉí³µÁ¾	Road 1	537.3976513	97.95684814	5.00E-05	-0.144169524	0	0.050980393	554.5009	988.7764	638.2679	1.8709	2.6352	1633	1.061886597	0.002452958	72.36460054	0.167162227
42.5815208	×ÔÉí³µÁ¾	Road 1	537.851107	97.94050598	5.00E-05	-0.17014724	0	0.050980393	554.9095	988.7813	638.2471	1.8734	2.6327	1634	1.061759491	0.002452664	72.38229761	0.167203107
42.59821707	×ÔÉí³µÁ¾	Road 1	538.305243	97.91946716	5.00E-05	-0.211355478	0	0.050980393	555.3726	988.7861	638.2234	1.8768	2.6291	1635	1.061595856	0.002452286	72.40002229	0.167244051
42.61485615	×ÔÉí³µÁ¾	Road 1	538.7576873	97.88997574	5.00E-05	-0.192129716	0	0.050980393	555.9988	988.793	638.1914	1.8812	2.6246	1636	1.061366478	0.002451757	72.41768246	0.167284846
42.63152236	×ÔÉí³µÁ¾	Road 1	539.2108307	97.88166733	4.98E-05	-0.181263134	0	0.050980393	556.1894	988.7949	638.1816	1.8827	2.6231	1637	1.061301857	0.002451607	72.43537034	0.167325705
42.64825199	×ÔÉí³µÁ¾	Road 1	539.6655894	97.85823212	4.91E-05	-0.17708832	0	0.050980393	556.7338	988.8008	638.1537	1.8867	2.6191	1638	1.061119583	0.002451186	72.45312247	0.167366713
42.66485918	×ÔÉí³µÁ¾	Road 1	540.1168916	97.83037491	4.80E-05	-0.195795149	0	0.050980393	557.3597	988.8066	638.1218	1.8926	2.6135	1639	1.060902916	0.002450686	72.47074108	0.167407412
42.6815998	×ÔÉí³µÁ¾	Road 1	540.5717384	97.81289291	4.65E-05	-0.193657845	0	0.050980393	557.7406	988.8115	638.1023	1.8949	2.6115	1640	1.060766945	0.002450372	72.48849898	0.167448433
42.69824511	×ÔÉí³µÁ¾	Road 1	541.0238785	97.78755569	4.48E-05	-0.18350032	0	0.050980393	558.3118	988.8174	638.073	1.8995	2.607	1641	1.060569878	0.002449916	72.5061525	0.167489212
42.7148666	×ÔÉí³µÁ¾	Road 1	541.4752925	97.77044449	4.29E-05	-0.207470611	0	0.05882353	558.6925	988.8213	638.0536	1.9024	2.604	1642	1.06043679	0.002449609	72.52377854	0.167529928
42.73171902	×ÔÉí³µÁ¾	Road 1	541.9328859	97.75071716	4.11E-05	-0.272509158	0	0.05882353	559.0732	988.8252	638.0341	1.9054	2.601	1643	1.060283356	0.002449255	72.54164688	0.167571204
42.74825473	×ÔÉí³µÁ¾	Road 1	542.3817274	97.71755219	3.86E-05	-0.284124345	0	0.05882353	559.644	988.8311	638.0049	1.9099	2.5965	1644	1.060025406	0.002448659	72.55917515	0.167611695
42.76491288	×ÔÉí³µÁ¾	Road 1	542.833796	97.69677429	3.65E-05	-0.24599205	0	0.05882353	560.0244	988.835	637.9854	1.9128	2.5935	1645	1.0598638	0.002448285	72.57683052	0.167652478
42.78158532	×ÔÉí³µÁ¾	Road 1	543.2861379	97.67201385	3.40E-05	-0.229572654	0	0.05882353	560.4048	988.8398	637.9659	1.9148	2.5914	1646	1.059671219	0.002447841	72.59449782	0.16769329
42.79824273	×ÔÉí³µÁ¾	Road 1	543.7379615	97.64811859	3.18E-05	-0.256478876	0	0.05882353	560.9752	988.8457	637.9368	1.9193	2.5869	1647	1.059485367	0.002447411	72.61214611	0.167734058
42.81488804	×ÔÉí³µÁ¾	Road 1	544.1893603	97.6272171	2.95E-05	-0.267205536	0	0.05882353	561.3554	988.8496	637.9173	1.9222	2.5839	1648	1.0593228	0.002447036	72.62977887	0.167774789
42.83153812	×ÔÉí³µÁ¾	Road 1	544.6407853	97.60494919	2.71E-05	-0.258237034	0	0.05882353	561.7626	988.8535	637.8965	1.9257	2.5804	1649	1.059149605	0.002446636	72.64741379	0.167815526
42.84825895	×ÔÉí³µÁ¾	Road 1	545.0939886	97.57483292	2.53E-05	-0.245522663	0	0.05882353	562.3326	988.8604	637.8673	1.9291	2.5769	1650	1.058915367	0.002446094	72.66511973	0.167856427
42.86487237	×ÔÉí³µÁ¾	Road 1	545.5441888	97.55489273	2.34E-05	-0.250206798	0	0.05882353	562.7125	988.8643	637.8479	1.9321	2.5739	1651	1.058760277	0.002445736	72.68270937	0.167897059
42.88164562	×ÔÉí³µÁ¾	Road 1	545.9986188	97.533181	2.17E-05	-0.256129354	0	0.05882353	563.1194	988.8682	637.8271	1.9355	2.5704	1652	1.058591408	0.002445346	72.70046538	0.167938075
42.89821579	×ÔÉí³µÁ¾	Road 1	546.4474468	97.51141434	2.03E-05	-0.256718993	0	0.05882353	563.5263	988.873	637.8063	1.938	2.5679	1653	1.058422112	0.002444955	72.71800361	0.167978588
42.91490289	×ÔÉí³µÁ¾	Road 1	546.8992873	97.4780365	1.93E-05	-0.250616252	0	0.05882353	564.15	988.8789	637.7744	1.9434	2.5625	1654	1.058162506	0.002444355	72.73566128	0.168019378
42.9315548	×ÔÉí³µÁ¾	Road 1	547.3500826	97.45804825	1.80E-05	-0.251015723	0	0.05882353	564.5295	988.8828	637.7549	1.9464	2.5595	1655	1.058007042	0.002443996	72.75327912	0.168060075
42.94820488	×ÔÉí³µÁ¾	Road 1	547.8007343	97.43775101	1.67E-05	-0.252913445	0	0.05882353	564.9089	988.8877	637.7355	1.9483	2.5575	1656	1.057849174	0.002443632	72.77089239	0.168100761
42.96488502	×ÔÉí³µÁ¾	Road 1	548.2520523	97.40594559	1.55E-05	-0.253023297	0	0.05882353	565.505	988.8936	637.705	1.9533	2.5526	1657	1.057601799	0.00244306	72.78853334	0.168141512
42.98167549	×ÔÉí³µÁ¾	Road 1	548.7062596	97.38538055	1.46E-05	-0.275694907	0	0.06666667	565.8842	988.8975	637.6857	1.9562	2.5497	1658	1.057441849	0.002442691	72.80628828	0.168182526
42.99828305	×ÔÉí³µÁ¾	Road 1	549.1553554	97.34993591	1.35E-05	-0.352948219	0	0.06666667	566.4529	988.9033	637.6565	1.9606	2.5453	1659	1.057166168	0.002442054	72.82384523	0.168223082
43.01490271	×ÔÉí³µÁ¾	Road 1	549.6047196	97.3372261	1.27E-05	-0.356024325	0	0.06666667	566.6425	988.9053	637.6469	1.9621	2.5438	1660	1.057067314	0.002441825	72.84141333	0.168263665
43.03192961	×ÔÉí³µÁ¾	Road 1	550.0648761	97.29095993	1.17E-05	-0.299196243	0	0.06666667	567.3732	988.9131	637.6095	1.9675	2.5384	1661	1.056707466	0.002440994	72.85940578	0.168305227
43.0482157	×ÔÉí³µÁ¾	Road 1	550.5049076	97.26788177	1.09E-05	-0.334740937	0	0.074509807	567.752	988.917	637.5901	1.9704	2.5355	1662	1.056527969	0.00244058	72.87661249	0.168344975
43.06484525	×ÔÉí³µÁ¾	Road 1	550.954097	97.24145279	1.02E-05	-0.413891822	0	0.074509807	568.1307	988.9219	637.5707	1.9724	2.5335	1663	1.056322411	0.002440105	72.89417866	0.168385553
43.08154481	×ÔÉí³µÁ¾	Road 1	551.4049753	97.19784393	9.65E-06	-0.416668355	0	0.074509807	568.6985	988.9277	637.5416	1.9759	2.5291	1664	1.055983231	0.002439321	72.91181312	0.168426288
43.09833932	×ÔÉí³µÁ¾	Road 1	551.8582879	97.17021332	9.32E-06	-0.392389327	0	0.082352944	569.0768	988.9316	637.5223	1.9788	2.5262	1665	1.055768326	0.002438825	72.92954422	0.168467247
43.11484754	×ÔÉí³µÁ¾	Road 1	552.303742	97.1415596	9.08E-06	-0.461082876	0	0.090196081	569.4552	988.9355	637.5029	1.9818	2.5232	1666	1.055545464	0.00243831	72.9469694	0.168507499
43.13163801	×ÔÉí³µÁ¾	Road 1	552.7565697	97.08959427	8.96E-06	-0.584538102	0	0.090196081	570.0224	988.9414	637.4739	1.9863	2.5189	1667	1.055141289	0.002437376	72.96468572	0.168548424
43.14820048	×ÔÉí³µÁ¾	Road 1	553.2030812	97.05321579	8.96E-06	-0.551249802	0	0.090196081	570.4003	988.9453	637.4546	1.9892	2.5159	1668	1.054858345	0.002436723	72.98215679	0.168588782
43.16488869	×ÔÉí³µÁ¾	Road 1	553.6528149	97.01711197	8.96E-06	-0.514047205	0	0.098039217	570.8052	988.9502	637.4339	1.9917	2.5135	1669	1.054577538	0.002436074	72.99975579	0.168629436
43.18156186	×ÔÉí³µÁ¾	Road 1	554.101983	96.98246384	8.96E-06	-0.565462112	0	0.098039217	571.1829	988.9541	637.4146	1.9946	2.5106	1670	1.054308052	0.002435452	73.01733445	0.168670043
43.19826949	×ÔÉí³µÁ¾	Road 1	554.5517768	96.91726685	8.96E-06	-0.618416429	0	0.098039217	571.83	988.9609	637.3815	1.9996	2.5057	1671	1.053800964	0.00243428	73.03494097	0.168710714
43.21485615	×ÔÉí³µÁ¾	Road 1	554.9981403	96.87954254	8.96E-06	-0.582980931	0	0.098039217	572.2073	988.9648	637.3622	2.0025	2.5028	1672	1.053507553	0.002433602	73.05241514	0.168751079
43.23153483	×ÔÉí³µÁ¾	Road 1	555.4468131	96.84355545	8.96E-06	-0.557012677	0	0.098039217	572.5844	988.9688	637.3429	2.0055	2.4999	1673	1.053227654	0.002432956	73.06998158	0.168791657
43.24824905	×ÔÉí³µÁ¾	Road 1	555.8962773	96.80802841	8.96E-06	-0.566640496	0	0.098039217	572.9614	988.9727	637.3235	2.0084	2.497	1674	1.052951332	0.002432318	73.08758085	0.168832312
43.26491636	×ÔÉí³µÁ¾	Road 1	556.3442738	96.76349945	8.96E-06	-0.590390742	0	0.098039217	573.4191	988.9775	637.3002	2.0118	2.4936	1675	1.052604996	0.002431518	73.10512494	0.168872839
43.28151512	×ÔÉí³µÁ¾	Road 1	556.7901335	96.69968262	8.96E-06	-0.582121313	0	0.098039217	574.0648	988.9844	637.2672	2.0167	2.4888	1676	1.052108643	0.002430371	73.12258864	0.16891318
43.29818573	×ÔÉí³µÁ¾	Road 1	557.2377536	96.66309128	8.96E-06	-0.572563291	0	0.098039217	574.4412	988.9883	637.2479	2.0196	2.4859	1677	1.051824043	0.002429714	73.14012319	0.168953685
43.31484534	×ÔÉí³µÁ¾	Road 1	557.6849116	96.62702866	8.96E-06	-0.574121833	0	0.098039217	574.8175	988.9922	637.2286	2.0226	2.4829	1678	1.051543556	0.002429066	73.15764149	0.168994152
43.33150129	×ÔÉí³µÁ¾	Road 1	558.1317894	96.5877388	8.96E-06	-0.580682933	0	0.098039217	575.2205	988.9971	637.208	2.025	2.4805	1679	1.051237968	0.00242836	73.17515085	0.169034598
43.34819022	×ÔÉí³µÁ¾	Road 1	558.5793575	96.54572983	8.96E-06	-0.581781745	0	0.098039217	575.6502	989.001	637.186	2.0289	2.4766	1680	1.050911232	0.002427605	73.19268944	0.169075113
43.36486376	×ÔÉí³µÁ¾	Road 1	559.0262222	96.48299103	8.96E-06	-0.576577961	0	0.098039217	576.2944	989.0078	637.1531	2.0338	2.4717	1681	1.050423264	0.002426478	73.21020372	0.169115571
43.38277003	×ÔÉí³µÁ¾	Road 1	559.5059437	96.44652328	8.96E-06	-0.576728046	0	0.098039217	576.67	989.0117	637.1339	2.0367	2.4688	1682	1.050139626	0.002425823	73.2290078	0.169159008
43.39919394	×ÔÉí³µÁ¾	Road 1	559.9457017	96.39168091	8.96E-06	-0.578945339	0	0.098039217	577.2332	989.0186	637.105	2.0401	2.4654	1683	1.049713074	0.002424837	73.2462482	0.169198833
43.41498188	×ÔÉí³µÁ¾	Road 1	560.368274	96.35585175	8.96E-06	-0.531005323	0	0.082352944	577.6085	989.0225	637.0858	2.043	2.4625	1684	1.049434402	0.002424193	73.2628166	0.169237106
43.43159054	×ÔÉí³µÁ¾	Road 1	560.8126727	96.32536469	8.96E-06	-0.386206537	0	0.074509807	577.9836	989.0264	637.0667	2.0459	2.4596	1685	1.049197281	0.002423646	73.28024236	0.16927736
43.44824539	×ÔÉí³µÁ¾	Road 1	561.2581611	96.29379272	8.96E-06	-0.17676872	0	0.05882353	578.5461	989.0322	637.0378	2.0503	2.4552	1686	1.048951721	0.002423078	73.29771249	0.169317716
43.46484745	×ÔÉí³µÁ¾	Road 1	561.7021686	96.27883759	8.96E-06	-0.137977302	0	0.050980393	578.921	989.0361	637.0187	2.0532	2.4523	1687	1.048835403	0.00242281	73.31512532	0.169357939
43.48167018	×ÔÉí³µÁ¾	Road 1	562.1520104	96.26443863	8.96E-06	-0.13594985	0	0.043137256	579.2958	989.04	636.9995	2.0561	2.4494	1688	1.048723412	0.002422551	73.33276771	0.169398693
43.49824108	×ÔÉí³µÁ¾	Road 1	562.5950298	96.24518509	8.96E-06	-0.020034892	0	0.027450981	579.8848	989.0459	636.9694	2.0609	2.4446	1689	1.048573662	0.002422205	73.35014352	0.169438832
43.51487613	×ÔÉí³µÁ¾	Road 1	563.0397492	96.24195786	8.96E-06	0.046861365	0	0.027450981	580.0721	989.0479	636.9598	2.0624	2.4431	1690	1.048548561	0.002422147	73.36758618	0.169479124
43.53155554	×ÔÉí³µÁ¾	Road 1	563.485635	96.23777618	8.96E-06	0.087230667	0	0.027450981	580.6343	989.0547	636.931	2.0657	2.4398	1691	1.048516037	0.002422072	73.38507481	0.169519523
43.5482485	×ÔÉí³µÁ¾	Road 1	563.9318414	96.22873993	8.96E-06	-0.021423282	0	0.027450981	581.1964	989.0605	636.9023	2.0701	2.4354	1692	1.048445755	0.00242191	73.40257648	0.169559952
43.56488026	×ÔÉí³µÁ¾	Road 1	564.3763722	96.22021179	8.96E-06	-0.001118581	0	0.019607844	581.571	989.0645	636.8832	2.073	2.4325	1693	1.048379425	0.002421756	73.42001286	0.16960023
43.5815373	×ÔÉí³µÁ¾	Road 1	564.8215573	96.2155426	8.96E-06	0.1039799	0	0.019607844	581.9457	989.0684	636.864	2.0759	2.4296	1694	1.048343109	0.002421673	73.43747516	0.169640568
43.59827022	×ÔÉí³µÁ¾	Road 1	565.2687686	96.21514435	8.96E-06	0.152588993	0	0.019607844	582.347	989.0723	636.8434	2.0793	2.4262	1695	1.048340012	0.002421665	73.45501695	0.169681089
43.61485945	×ÔÉí³µÁ¾	Road 1	565.7121337	96.21388092	8.96E-06	0.09201467	0	0.019607844	582.8019	989.0771	636.8201	2.0827	2.4228	1696	1.048330185	0.002421643	73.47240795	0.169721262
43.63156232	×ÔÉí³µÁ¾	Road 1	566.158511	96.20855255	8.96E-06	0.043924876	0	0.019607844	583.2568	989.082	636.7969	2.086	2.4195	1697	1.048288742	0.002421547	73.48991737	0.169761709
43.64823842	×ÔÉí³µÁ¾	Road 1	566.6041485	96.20321045	8.96E-06	0.071171045	0	0.019607844	583.685	989.0869	636.775	2.0889	2.4166	1698	1.048247192	0.002421451	73.50739805	0.169802089
43.66484452	×ÔÉí³µÁ¾	Road 1	567.0478951	96.19890518	8.96E-06	0.107175857	0	0.019607844	584.3271	989.0938	636.7421	2.0938	2.4117	1699	1.048213707	0.002421374	73.52480479	0.169842299
43.68148726	×ÔÉí³µÁ¾	Road 1	567.4926163	96.19782028	8.96E-06	0.09996485	0	0.019607844	584.5144	989.0957	636.7325	2.0952	2.4103	1700	1.048205269	0.002421354	73.5422498	0.169882597
43.69821286	×ÔÉí³µÁ¾	Road 1	567.9395202	96.19116669	8.96E-06	0.07162036	0	0.019607844	585.2635	989.1035	636.6942	2.101	2.4045	1701	1.048153519	0.002421235	73.55978079	0.169923094
43.71484754	×ÔÉí³µÁ¾	Road 1	568.383987	96.18940887	8.96E-06	0.07425689	0	0.019607844	585.4508	989.1055	636.6846	2.1025	2.403	1702	1.048139847	0.002421203	73.57721626	0.16996337
43.7315724	×ÔÉí³µÁ¾	Road 1	568.8308426	96.18499374	8.96E-06	0.089907512	0	0.019607844	585.9323	989.1104	636.66	2.1063	2.3992	1703	1.048105507	0.002421124	73.59474568	0.170003863
43.74824484	×ÔÉí³µÁ¾	Road 1	569.2762835	96.18191757	8.96E-06	0.090906076	0	0.019607844	586.3604	989.1152	636.6381	2.1092	2.3963	1704	1.048081581	0.002421068	73.61221976	0.170044228
43.76483993	×ÔÉí³µÁ¾	Road 1	569.7196411	96.17823715	8.96E-06	0.082566604	0	0.019607844	586.8151	989.1201	636.6149	2.1126	2.3929	1705	1.048052956	0.002421002	73.6296123	0.170084404
43.7815428	×ÔÉí³µÁ¾	Road 1	570.1658507	96.1724144	8.96E-06	0.082446665	0	0.019607844	587.4571	989.127	636.582	2.1174	2.3881	1706	1.048007668	0.002420898	73.64711703	0.17012484
43.79816759	×ÔÉí³µÁ¾	Road 1	570.6099667	96.17070465	8.96E-06	0.084424183	0	0.019607844	587.6711	989.1289	636.571	2.1194	2.3862	1707	1.04799437	0.002420867	73.66453971	0.170165087
43.81487228	×ÔÉí³µÁ¾	Road 1	571.0561925	96.16534882	8.96E-06	0.085662775	0	0.019607844	588.3397	989.1357	636.5368	2.1246	2.3808	1708	1.047952713	0.002420771	73.68204544	0.170205525
43.83155132	×ÔÉí³µÁ¾	Road 1	571.501718	96.16211472	8.96E-06	0.084504075	0	0.019607844	588.7142	989.1396	636.5177	2.1275	2.3779	1709	1.047927559	0.002420713	73.69952387	0.1702459
43.84821276	×ÔÉí³µÁ¾	Road 1	571.9467576	96.15869522	8.96E-06	0.082926191	0	0.019607844	589.1154	989.1445	636.4971	2.1299	2.3755	1710	1.047900963	0.002420651	73.71698341	0.170286232
43.86483792	×ÔÉí³µÁ¾	Road 1	572.3908131	96.15548859	8.96E-06	0.083495341	0	0.019607844	589.4897	989.1484	636.478	2.1327	2.3726	1711	1.047876022	0.002420594	73.73440451	0.170326474
43.88156681	×ÔÉí³µÁ¾	Road 1	572.8376145	96.15012589	8.96E-06	0.085173376	0	0.019607844	590.1316	989.1553	636.4452	2.1375	2.3678	1712	1.047834312	0.002420497	73.75193361	0.170366967
43.89821945	×ÔÉí³µÁ¾	Road 1	573.282365	96.14700851	8.96E-06	0.084683932	0	0.019607844	590.5059	989.1592	636.426	2.1403	2.3649	1713	1.047810066	0.002420441	73.76938242	0.170407273
43.91483251	×ÔÉí³µÁ¾	Road 1	573.7260364	96.14226379	8.96E-06	0.083894908	0	0.019607844	591.0675	989.165	636.3973	2.1446	2.3606	1714	1.047773163	0.002420356	73.78678914	0.170447483
43.93150642	×ÔÉí³µÁ¾	Road 1	574.1713182	96.13909836	8.96E-06	0.084374361	0	0.019607844	591.4418	989.1689	636.3782	2.1475	2.3577	1715	1.047748543	0.002420299	73.8042592	0.170487839
43.94815503	×ÔÉí³µÁ¾	Road 1	574.6159099	96.13593979	8.96E-06	0.084833801	0	0.019607844	591.8162	989.1729	636.359	2.1503	2.3548	1716	1.047723976	0.002420242	73.82170235	0.170528132
43.96485386	×ÔÉí³µÁ¾	Road 1	575.0618282	96.13282928	8.96E-06	0.085193239	0	0.019607844	592.1905	989.1768	636.3398	2.1532	2.3519	1717	1.047699783	0.002420186	73.83919772	0.170568547
43.98153547	×ÔÉí³µÁ¾	Road 1	575.5072698	96.1292244	8.96E-06	0.08396481	0	0.019607844	592.6183	989.1816	636.3179	2.156	2.349	1718	1.047671745	0.002420122	73.85667456	0.170608918
43.99822477	×ÔÉí³µÁ¾	Road 1	575.9529002	96.12561951	8.96E-06	0.084444158	0	0.019607844	593.046	989.1855	636.296	2.1599	2.3452	1719	1.047643707	0.002420057	73.874159	0.170649307
44.01489464	×ÔÉí³µÁ¾	Road 1	576.3979943	96.12183609	8.96E-06	0.084853768	0	0.019607844	593.5005	989.1904	636.2728	2.1632	2.3418	1720	1.047614281	0.002419989	73.8916226	0.170689648
44.0315154	×ÔÉí³µÁ¾	Road 1	576.841752	96.11643219	8.96E-06	0.084484212	0	0.019607844	594.1422	989.1973	636.24	2.1679	2.337	1721	1.04757225	0.002419892	73.90903404	0.170729869
44.04823916	×ÔÉí³µÁ¾	Road 1	577.2882452	96.11330109	8.96E-06	0.084484212	0	0.019607844	594.5164	989.2012	636.2208	2.1708	2.3341	1722	1.047547897	0.002419836	73.92655298	0.170770337
44.06488924	×ÔÉí³µÁ¾	Road 1	577.7327551	96.10978546	8.96E-06	0.060873743	0	0.027450981	594.8906	989.2051	636.2017	2.1737	2.3313	1723	1.047520554	0.002419772	73.94399428	0.170810627
44.0814803	×ÔÉí³µÁ¾	Road 1	578.1756596	96.10329666	8.96E-06	-0.002177305	0	0.027450981	595.2916	989.21	636.1812	2.176	2.329	1724	1.047470085	0.002419656	73.96137292	0.170850771
44.09904164	×ÔÉí³µÁ¾	Road 1	578.6444008	96.08996201	8.96E-06	-0.002457026	0	0.027450981	595.9063	989.2158	636.1497	2.1813	2.3237	1725	1.047366371	0.002419416	73.97976608	0.17089326
44.11489116	×ÔÉí³µÁ¾	Road 1	579.0674221	96.08345261	8.96E-06	0.033128511	0	0.027450981	596.2804	989.2197	636.1306	2.1841	2.3209	1726	1.047315742	0.002419299	73.99636553	0.170931604
44.13154124	×ÔÉí³µÁ¾	Road 1	579.5117848	96.07797318	8.96E-06	0.041557953	0	0.027450981	596.6545	989.2246	636.1115	2.186	2.319	1727	1.047273125	0.002419201	74.01380271	0.170971884
44.14822211	×ÔÉí³µÁ¾	Road 1	579.956941	96.07186203	8.96E-06	0.020524267	0	0.027450981	597.0554	989.2285	636.0909	2.1893	2.3157	1728	1.047225594	0.002419091	74.03127135	0.171012237
44.16480658	×ÔÉí³µÁ¾	Road 1	580.3994725	96.06055984	8.96E-06	0.006671594	0	0.027450981	597.6699	989.2354	636.0596	2.1936	2.3115	1729	1.047137688	0.002418888	74.04863757	0.171052353
44.18155526	×ÔÉí³µÁ¾	Road 1	580.8463558	96.05412598	8.96E-06	0.018257067	0	0.027450981	598.0172	989.2383	636.0417	2.197	2.3082	1730	1.047087646	0.002418772	74.06617491	0.171092864
44.19820974	×ÔÉí³µÁ¾	Road 1	581.290683	96.04490433	8.96E-06	0.027375758	0	0.027450981	598.5781	989.2441	636.0131	2.2013	2.3039	1731	1.047015923	0.002418607	74.08361241	0.171133145
44.21491224	×ÔÉí³µÁ¾	Road 1	581.736262	96.03860092	8.96E-06	0.021023754	0	0.027450981	598.9521	989.248	635.9939	2.2042	2.301	1732	1.046966896	0.002418494	74.10109938	0.17117354
44.23151576	×ÔÉí³µÁ¾	Road 1	582.1791695	96.03182373	8.96E-06	0.014751509	0	0.027450981	599.3528	989.2529	635.9734	2.2067	2.2986	1733	1.046914185	0.002418372	74.11848184	0.171213693
44.24823182	×ÔÉí³µÁ¾	Road 1	582.6250318	96.02168198	8.96E-06	0.018546816	0	0.027450981	599.9136	989.2588	635.9447	2.211	2.2942	1734	1.046835304	0.00241819	74.13598081	0.171254116
44.2648885	×ÔÉí³µÁ¾	Road 1	583.0692818	96.01554337	8.96E-06	0.02184255	0	0.027450981	600.2875	989.2627	635.9255	2.2139	2.2913	1735	1.04678756	0.002418079	74.15341681	0.171294393
44.28156351	×ÔÉí³µÁ¾	Road 1	583.5139762	96.00595093	8.96E-06	0.020214727	0	0.027450981	600.8483	989.2686	635.8969	2.2183	2.2866	1736	1.046712952	0.002417907	74.17087075	0.171334711
44.29825868	×ÔÉí³µÁ¾	Road 1	583.9591784	95.99951019	8.96E-06	0.018137187	0	0.027450981	601.222	989.2725	635.8777	2.2212	2.2835	1737	1.046662857	0.002417791	74.18834496	0.171375077
44.3148732	×ÔÉí³µÁ¾	Road 1	584.4021979	95.99254074	8.96E-06	-0.005083594	0	0.035294119	601.5958	989.2764	635.8586	2.2241	2.2806	1738	1.04660865	0.002417666	74.20573387	0.171415245
44.33155517	×ÔÉí³µÁ¾	Road 1	584.8469713	95.98291397	8.96E-06	-0.087100863	0	0.043137256	601.9696	989.2803	635.8395	2.227	2.2778	1739	1.046533775	0.002417493	74.22319211	0.171455574
44.34829945	×ÔÉí³µÁ¾	Road 1	585.2932825	95.95634766	8.96E-06	-0.213393033	0	0.050980393	602.6102	989.2871	635.8068	2.2319	2.273	1740	1.046327148	0.002417016	74.24071211	0.171496045
44.36481061	×ÔÉí³µÁ¾	Road 1	585.7332949	95.93784256	8.96E-06	-0.215869978	0	0.050980393	602.9838	989.291	635.7876	2.2348	2.2702	1741	1.04618322	0.002416683	74.25798581	0.171535947
44.38154353	×ÔÉí³µÁ¾	Road 1	586.1791356	95.9202713	8.96E-06	-0.201487988	0	0.05882353	603.3573	989.2949	635.7685	2.2378	2.2673	1742	1.046046555	0.002416368	74.27548922	0.17157638
44.39824676	×ÔÉí³µÁ¾	Road 1	586.6240425	95.88953018	8.96E-06	-0.300144523	0	0.06666667	603.9442	989.3018	635.7385	2.2417	2.2635	1743	1.045807457	0.002415815	74.29295759	0.171616732
44.41486202	×ÔÉí³µÁ¾	Road 1	587.0664912	95.86461182	8.96E-06	-0.391589582	0	0.074509807	604.3174	989.3057	635.7194	2.2445	2.2607	1744	1.045613647	0.002415368	74.31033073	0.171656864
44.43148277	×ÔÉí³µÁ¾	Road 1	587.5089518	95.83549118	8.92E-06	-0.457976431	0	0.082352944	604.6907	989.3096	635.7003	2.2472	2.2579	1745	1.045387154	0.002414844	74.32770585	0.171697001
44.44816291	×ÔÉí³µÁ¾	Road 1	587.9528473	95.80400162	8.92E-06	-0.502510786	0	0.098039217	605.0638	989.3135	635.6812	2.2499	2.255	1746	1.045142235	0.002414279	74.34513897	0.171737271
44.46482436	×ÔÉí³µÁ¾	Road 1	588.3959903	95.74888458	8.92E-06	-0.661431611	0	0.105882354	605.6232	989.3193	635.6526	2.2541	2.2508	1747	1.044713547	0.002413288	74.3625454	0.17177748
44.48150596	×ÔÉí³µÁ¾	Road 1	588.8393748	95.68530807	8.92E-06	-0.755204201	0	0.121568628	606.1556	989.3252	635.6254	2.2579	2.247	1748	1.044219063	0.002412146	74.37996465	0.171817718
44.49819123	×ÔÉí³µÁ¾	Road 1	589.2826228	95.6348259	8.92E-06	-0.910289884	0	0.137254909	606.5281	989.3291	635.6063	2.2607	2.2441	1749	1.043826424	0.002411239	74.39738118	0.171857951
44.51484607	×ÔÉí³µÁ¾	Road 1	589.7246618	95.5481781	8.92E-06	-1.026165962	0	0.152941182	607.0864	989.335	635.5778	2.2649	2.2399	1750	1.043152496	0.002409682	74.41475472	0.171898083
44.53155993	×ÔÉí³µÁ¾	Road 1	590.1679632	95.48274078	8.92E-06	-1.222548842	0	0.176470593	607.4583	989.3389	635.5587	2.2677	2.237	1751	1.042643539	0.002408507	74.43218132	0.171938339
44.54835664	×ÔÉí³µÁ¾	Road 1	590.6131711	95.4204277	8.92E-06	-1.359135985	0	0.192156866	607.7769	989.3418	635.5424	2.2706	2.2341	1752	1.042158882	0.002407387	74.44968615	0.171978775
44.56481134	×ÔÉí³µÁ¾	Road 1	591.0487179	95.28995819	8.92E-06	-1.634914279	0	0.215686277	608.3603	989.3486	635.5126	2.2743	2.2304	1753	1.041144119	0.002405043	74.46681787	0.172018349
44.58155893	×ÔÉí³µÁ¾	Road 1	591.4915843	95.19697266	8.92E-06	-1.754672289	0	0.239215687	608.7311	989.3525	635.4936	2.2771	2.2276	1754	1.040420898	0.002403372	74.48424241	0.1720586
44.59826912	×ÔÉí³µÁ¾	Road 1	591.93297	95.09096146	8.92E-06	-1.869518399	0	0.247058824	609.1281	989.3564	635.4733	2.2803	2.2242	1755	1.039596367	0.002401468	74.50161426	0.172098729
44.61485029	×ÔÉí³µÁ¾	Road 1	592.3702245	94.93398056	8.92E-06	-1.986901283	0	0.262745112	609.683	989.3623	635.4449	2.2845	2.22	1756	1.038375404	0.002398647	74.51883174	0.172138501
44.63149524	×ÔÉí³µÁ¾	Road 1	592.8086553	94.82461853	8.92E-06	-2.063366652	0	0.278431386	610.0524	989.3662	635.426	2.2873	2.2172	1757	1.037524811	0.002396682	74.53610129	0.172178394
44.64817024	×ÔÉí³µÁ¾	Road 1	593.2470564	94.64727173	8.92E-06	-2.375904083	0	0.309803933	610.6057	989.3721	635.3977	2.2915	2.213	1758	1.036145447	0.002393496	74.55337902	0.172218306
44.66481116	×ÔÉí³µÁ¾	Road 1	593.6839506	94.51518173	8.92E-06	-2.524041653	0	0.309803933	610.9739	989.376	635.3789	2.2943	2.2102	1759	1.03511808	0.002391123	74.57060433	0.172258096
44.68144401	×ÔÉí³µÁ¾	Road 1	594.1200156	94.38151932	8.92E-06	-2.484312534	0	0.325490206	611.3417	989.3799	635.36	2.2971	2.2075	1760	1.034078484	0.002388721	74.58780401	0.172297827
44.69819196	×ÔÉí³µÁ¾	Road 1	594.5581711	94.18226852	8.84E-06	-2.532672167	0	0.333333343	611.8923	989.3857	635.3319	2.3012	2.2033	1761	1.032528755	0.002385141	74.60509675	0.172337773
44.71551284	×ÔÉí³µÁ¾	Road 1	595.0106545	94.04489136	8.68E-06	-2.627708673	0	0.34117648	612.2588	989.3896	635.3131	2.304	2.2006	1762	1.031460266	0.002382673	74.62296254	0.172379043
44.73144337	×ÔÉí³µÁ¾	Road 1	595.4261893	93.90304413	8.42E-06	-2.698093891	0	0.349019617	612.6246	989.3936	635.2944	2.3067	2.1978	1763	1.03035701	0.002380125	74.63937668	0.17241696
44.7481334	×ÔÉí³µÁ¾	Road 1	595.8605259	93.68535004	7.93E-06	-2.771318674	0	0.356862754	613.1724	989.3994	635.2664	2.3108	2.1937	1764	1.028663834	0.002376213	74.65654511	0.172456619
44.76484727	×ÔÉí³µÁ¾	Road 1	596.2947966	93.53760452	7.29E-06	-2.789519548	0	0.356862754	613.5369	989.4033	635.2478	2.3135	2.191	1765	1.027514702	0.002373559	74.67371885	0.172496291
44.78157176	×ÔÉí³µÁ¾	Road 1	596.7283191	93.31710892	6.47E-06	-2.75069809	0	0.356862754	614.0826	989.4092	635.2198	2.3176	2.187	1766	1.025799736	0.002369597	74.69087483	0.172535921
44.79815769	×ÔÉí³µÁ¾	Road 1	597.1578675	93.23407288	5.59E-06	-2.74067831	0	0.36470589	614.2901	989.4111	635.2092	2.3194	2.1852	1767	1.0251539	0.002368106	74.70787796	0.172575198
44.81477148	×ÔÉí³µÁ¾	Road 1	597.5871176	93.01312408	4.64E-06	-2.823694468	0	0.36470589	614.834	989.417	635.1814	2.3234	2.1811	1768	1.02343541	0.002364136	74.7248811	0.172614475
44.83197726	×ÔÉí³µÁ¾	Road 1	598.0308899	92.851371	3.83E-06	-2.884037495	0	0.372549027	615.2216	989.4209	635.1616	2.3265	2.178	1769	1.02217733	0.00236123	74.74246846	0.172655102
44.84820213	×ÔÉí³µÁ¾	Road 1	598.448272	92.60939026	2.96E-06	-2.913450718	0	0.372549027	615.789	989.4268	635.1325	2.331	2.1736	1770	1.020295258	0.002356882	74.75902262	0.172693342
44.86486211	×ÔÉí³µÁ¾	Road 1	598.8761366	92.45585632	2.28E-06	-2.910775423	0	0.380392164	616.1493	989.4307	635.1141	2.3336	2.1709	1771	1.019101105	0.002354124	74.77600083	0.172732562
44.88146014	×ÔÉí³µÁ¾	Road 1	599.3016436	92.28958511	1.76E-06	-2.951714039	0	0.380392164	616.5346	989.4346	635.0944	2.3367	2.1679	1772	1.017807884	0.002351136	74.79289443	0.172771586
44.898163	×ÔÉí³µÁ¾	Road 1	599.7287414	92.0531868	1.33E-06	-3.017188311	0	0.388235301	617.0729	989.4404	635.0669	2.3406	2.164	1773	1.015969231	0.002346889	74.80986403	0.172810786
44.91485634	×ÔÉí³µÁ¾	Road 1	600.1548532	91.8931366	1.05E-06	-3.038983345	0	0.388235301	617.431	989.4443	635.0485	2.3432	2.1614	1774	1.014724396	0.002344013	74.82680316	0.172849915
44.93146756	×ÔÉí³µÁ¾	Road 1	600.5781289	91.73269501	8.84E-07	-3.048291683	0	0.396078438	617.7885	989.4482	635.0302	2.3458	2.1589	1775	1.013476517	0.002341131	74.84363825	0.172888804
44.94819352	×ÔÉí³µÁ¾	Road 1	601.0031901	91.48774796	7.41E-07	-3.15758872	0	0.403921574	618.3235	989.4541	635.0029	2.3497	2.1551	1776	1.011571373	0.00233673	74.86055774	0.172927888
44.9648359	×ÔÉí³µÁ¾	Road 1	601.4253505	91.3197052	6.34E-07	-3.221596241	0	0.411764711	618.6794	989.457	634.9846	2.3532	2.1516	1777	1.010264374	0.002333711	74.87737095	0.172966727
44.98150174	×ÔÉí³µÁ¾	Road 1	601.8473154	91.1489296	5.44E-07	-3.265353918	0	0.419607848	619.0347	989.4609	634.9665	2.3558	2.1491	1778	1.008936119	0.002330642	74.89418572	0.173005569
44.99815219	×ÔÉí³µÁ¾	Road 1	602.2676286	90.87609787	4.69E-07	-3.341963768	0	0.427450985	619.5915	989.4668	634.938	2.36	2.1449	1779	1.006814095	0.002325741	74.91094963	0.173044294
45.0148107	×ÔÉí³µÁ¾	Road 1	602.6873279	90.69942398	4.00E-07	-3.37823844	0	0.427450985	619.945	989.4707	634.9199	2.3625	2.1424	1780	1.005439964	0.002322566	74.92769876	0.173082984
45.03152566	×ÔÉí³µÁ¾	Road 1	603.1072055	90.43154297	3.39E-07	-3.448162556	0	0.443137258	620.4739	989.4766	634.8928	2.3663	2.1387	1781	1.003356445	0.002317753	74.94446982	0.173121725
45.04818271	×ÔÉí³µÁ¾	Road 1	603.5247799	90.24816742	2.84E-07	-3.540521145	0	0.450980395	620.8256	989.4805	634.8749	2.3688	2.1362	1782	1.001930191	0.002314459	74.96115902	0.173160277
45.0647965	×ÔÉí³µÁ¾	Road 1	603.9403375	90.04611511	2.33E-07	-3.6717906	0	0.474509805	621.2017	989.4844	634.8557	2.3717	2.1334	1783	1.000358673	0.002310829	74.97777877	0.173198669
45.081488	×ÔÉí³µÁ¾	Road 1	604.3568573	89.83441544	1.79E-07	-3.878102064	0	0.490196079	621.5769	989.4883	634.8364	2.3746	2.1305	1784	0.99871212	0.002307025	74.99444877	0.173237177
45.09818536	×ÔÉí³µÁ¾	Road 1	604.7720794	89.52306976	1.29E-07	-4.043814659	0	0.505882382	622.1006	989.4932	634.8096	2.3792	2.1259	1785	0.996290543	0.002301431	75.0110842	0.173275604
45.11481602	×ÔÉí³µÁ¾	Road 1	605.1846593	89.31025772	8.76E-08	-4.128044128	0	0.529411793	622.4488	989.4971	634.7919	2.3816	2.1235	1786	0.994635338	0.002297608	75.02762563	0.173313815
45.13165414	×ÔÉí³µÁ¾	Road 1	605.6008288	88.97725525	6.03E-08	-4.392018318	0	0.545098066	622.9694	989.5029	634.7651	2.3852	2.12	1787	0.992045319	0.002291625	75.04432981	0.173352402
45.148162	×ÔÉí³µÁ¾	Road 1	606.0077762	88.74628143	3.63E-08	-4.47629261	0	0.56078434	623.3154	989.5068	634.7475	2.3876	2.1176	1788	0.990248856	0.002287475	75.0606767	0.173390163
45.18192292	×ÔÉí³µÁ¾	Road 1	606.8347516	88.18216782	2.48E-08	-4.749021053	0	0.58431375	624.1273	989.5146	634.7059	2.3946	2.1108	1789	0.985861305	0.00227734	75.09396029	0.173467048
45.19818335	×ÔÉí³µÁ¾	Road 1	607.2319362	87.93522949	1.65E-08	-4.768696308	0	0.600000024	624.4701	989.5186	634.6884	2.3969	2.1085	1790	0.983940674	0.002272903	75.10995959	0.173504007
45.21481107	×ÔÉí³µÁ¾	Road 1	607.6369379	87.68526306	7.99E-09	-4.91476965	0	0.639215708	624.812	989.5225	634.671	2.3992	2.1062	1791	0.98199649	0.002268412	75.12628795	0.173541725
45.23150294	×ÔÉí³µÁ¾	Road 1	608.0413741	87.22634354	4.86E-09	-5.358370781	0	0.654901981	625.3957	989.5283	634.641	2.4039	2.1015	1792	0.978427116	0.002260167	75.14261972	0.173579452
45.24813872	×ÔÉí³µÁ¾	Road 1	608.4431657	86.94808044	2.18E-09	-5.396180153	0	0.670588255	625.7347	989.5322	634.6237	2.4062	2.0993	1793	0.976262848	0.002255167	75.15886062	0.173616968
45.26488814	×ÔÉí³µÁ¾	Road 1	608.8457316	86.52464676	1.17E-09	-5.480151653	0	0.694117665	626.2413	989.5371	634.5978	2.4105	2.095	1794	0.972969475	0.002247559	75.17515729	0.173654613
45.28147077	×ÔÉí³µÁ¾	Road 1	609.2429377	86.23129807	4.71E-10	-5.762600899	0	0.709803939	626.5776	989.541	634.5806	2.4127	2.0928	1795	0.970687874	0.002242289	75.19125385	0.173691796
45.29975606	×ÔÉí³µÁ¾	Road 1	609.679296	85.91005096	1.80E-10	-5.837347507	0	0.725490212	626.9128	989.5449	634.5635	2.4149	2.0906	1796	0.968189285	0.002236517	75.20895747	0.173732692
45.31573277	×ÔÉí³µÁ¾	Road 1	610.0586413	85.47706604	4.32E-11	-5.95382452	0	0.749019623	627.4133	989.5498	634.5378	2.4191	2.0864	1797	0.964821625	0.002228738	75.22437215	0.1737683
45.3314441	×ÔÉí³µÁ¾	Road 1	610.4303242	85.16520538	4.44E-13	-6.131766319	0	0.75686276	627.7454	989.5537	634.5209	2.4212	2.0843	1798	0.962396042	0.002223135	75.23949268	0.173803228
45.34820415	×ÔÉí³µÁ¾	Road 1	610.8251201	84.80078201	-9.59E-14	-6.217461109	0	0.764705896	628.1235	989.5576	634.5015	2.4242	2.0813	1799	0.959561638	0.002216587	75.25557497	0.173840378
45.36480218	×ÔÉí³µÁ¾	Road 1	611.2142066	84.39022293	-1.75E-11	-6.189444065	0	0.764705896	628.4531	989.5605	634.4847	2.4272	2.0783	1800	0.956368401	0.002209211	75.2714488	0.173877047
45.38148781	×ÔÉí³µÁ¾	Road 1	611.6035621	84.00517273	-1.28E-10	-6.147052765	0	0.764705896	628.9451	989.5664	634.4595	2.4303	2.0752	1801	0.953373566	0.002202293	75.28735645	0.173913793
45.3981368	×ÔÉí³µÁ¾	Road 1	611.9905978	83.68853989	-9.76E-10	-6.147598743	0	0.764705896	629.2715	989.5693	634.4427	2.4333	2.0722	1802	0.950910866	0.002196604	75.30318815	0.173950365
45.41474985	×ÔÉí³µÁ¾	Road 1	612.3751302	83.32702103	-3.45E-09	-6.130260468	0	0.764705896	629.6431	989.5732	634.4237	2.4362	2.0694	1803	0.948099052	0.002190109	75.31893897	0.173986749
45.43145052	×ÔÉí³µÁ¾	Road 1	612.7594965	82.85409393	-9.14E-09	-6.123182297	0	0.764705896	630.1283	989.5781	634.3989	2.4401	2.0654	1804	0.944420731	0.002181612	75.33471142	0.174023183
45.44821056	×ÔÉí³µÁ¾	Road 1	613.1437565	82.53772202	-2.25E-08	-6.17153883	0	0.772549033	630.4503	989.582	634.3824	2.442	2.0635	1805	0.94196006	0.002175928	75.35049872	0.174059652
45.46484048	×ÔÉí³µÁ¾	Road 1	613.5235559	82.21793747	-4.85E-08	-6.239011765	0	0.772549033	630.7709	989.585	634.3661	2.4449	2.0606	1806	0.939472847	0.002170182	75.36612208	0.174095742
45.48149643	×ÔÉí³µÁ¾	Road 1	613.9016139	81.71310196	-9.69E-08	-6.217861652	0	0.772549033	631.2724	989.5908	634.3405	2.4482	2.0573	1807	0.935546349	0.002161112	75.38170448	0.174131737
45.49814138	×ÔÉí³µÁ¾	Road 1	614.2779498	81.39461517	-1.67E-07	-6.156602859	0	0.764705896	631.5899	989.5938	634.3241	2.451	2.0545	1808	0.933069229	0.00215539	75.39723537	0.174167614
45.51483874	×ÔÉí³µÁ¾	Road 1	614.6534862	80.96673889	-2.61E-07	-6.111034393	0	0.764705896	631.9062	989.5977	634.308	2.4529	2.0527	1809	0.929741302	0.002147702	75.4127596	0.174203475
45.53148589	×ÔÉí³µÁ¾	Road 1	615.0262308	80.60723877	-3.71E-07	-6.115648746	0	0.764705896	632.3783	989.6025	634.2838	2.4565	2.049	1810	0.92694519	0.002141243	75.4281906	0.17423912
45.54813964	×ÔÉí³µÁ¾	Road 1	615.3976658	80.29219208	-5.38E-07	-6.115499496	0	0.764705896	632.6915	989.6055	634.2678	2.4593	2.0462	1811	0.924494827	0.002135583	75.4435869	0.174274686
45.56480255	×ÔÉí³µÁ¾	Road 1	615.7677435	79.95481567	-7.33E-07	-6.117895603	0	0.764705896	633.0258	989.6094	634.2507	2.4615	2.044	1812	0.921870789	0.002129522	75.45894795	0.17431017
45.58146472	×ÔÉí³µÁ¾	Road 1	616.1355089	79.45872803	-9.27E-07	-6.145900726	0	0.764705896	633.5134	989.6143	634.2258	2.4654	2.0401	1813	0.918012329	0.002120608	75.47424403	0.174345504
45.59812543	×ÔÉí³µÁ¾	Road 1	616.5017778	79.14238358	-1.28E-06	-6.144332409	0	0.764705896	633.8221	989.6172	634.21	2.4681	2.0374	1814	0.915551872	0.002114925	75.48949778	0.17438074
45.61477258	×ÔÉí³µÁ¾	Road 1	616.8661845	78.80412827	-1.58E-06	-6.123476505	0	0.764705896	634.1296	989.6211	634.1943	2.4698	2.0357	1815	0.912920998	0.002108848	75.50469531	0.174415846
45.63151027	×ÔÉí³µÁ¾	Road 1	617.2304833	78.35466385	-1.95E-06	-6.106909275	0	0.764705896	634.5886	989.626	634.1708	2.4733	2.0322	1816	0.909425163	0.002100772	75.51991698	0.174451008
45.6481039	×ÔÉí³µÁ¾	Road 1	617.5900937	78.0177269	-2.41E-06	-6.115878105	0	0.764705896	634.9147	989.6289	634.1541	2.4763	2.0293	1817	0.906804543	0.002094718	75.53496416	0.174485767
45.6647998	×ÔÉí³µÁ¾	Road 1	617.9501462	77.63516235	-2.87E-06	-6.120392323	0	0.764705896	635.2178	989.6328	634.1385	2.4779	2.0277	1818	0.903829041	0.002087845	75.5500544	0.174520626
45.681477	×ÔÉí³µÁ¾	Road 1	618.3079194	77.23017883	-3.44E-06	-6.119436264	0	0.764705896	635.6702	989.6367	634.1154	2.4822	2.0233	1819	0.900679169	0.002080569	75.56507521	0.174555324
45.69818097	×ÔÉí³µÁ¾	Road 1	618.6648059	76.9153656	-4.15E-06	-6.118095398	0	0.764705896	635.9703	989.6406	634.1	2.4837	2.0218	1820	0.898230621	0.002074913	75.58007922	0.174589983
45.71477716	×ÔÉí³µÁ¾	Road 1	619.0172123	76.44300156	-4.82E-06	-6.113241196	0	0.764705896	636.418	989.6445	634.0771	2.4879	2.0176	1821	0.894556679	0.002066426	75.59492546	0.174624278
45.73141624	×ÔÉí³µÁ¾	Road 1	619.3690764	76.12863464	-5.53E-06	-6.107878685	0	0.764705896	636.715	989.6484	634.062	2.4894	2.0161	1822	0.892111603	0.002060778	75.60976938	0.174658567
45.74808722	×ÔÉí³µÁ¾	Road 1	619.72016	75.81447372	-6.44E-06	-6.10612011	0	0.764705896	637.0108	989.6514	634.0468	2.4919	2.0136	1823	0.889668129	0.002055133	75.62460101	0.174692828
45.76473143	×ÔÉí³µÁ¾	Road 1	620.0683962	75.32047348	-7.43E-06	-6.110185146	0	0.764705896	637.4731	989.6563	634.0231	2.4954	2.0101	1824	0.885825905	0.002046258	75.63934489	0.174726887
45.78144383	×ÔÉí³µÁ¾	Road 1	620.4165992	75.00606537	-8.26E-06	-6.110055447	0	0.764705896	637.7657	989.6592	634.0082	2.4978	2.0077	1825	0.883380508	0.002040609	75.65410829	0.17476099
45.81513254	×ÔÉí³µÁ¾	Road 1	621.1107335	74.17569122	-9.36E-06	-6.103796482	0	0.764705896	638.5332	989.667	633.9689	2.5039	2.0016	1826	0.876922043	0.00202569	75.68365067	0.174829233
45.83144319	×ÔÉí³µÁ¾	Road 1	621.4454828	73.88410034	-1.05E-05	-6.102973938	0	0.764705896	638.6981	989.6689	633.9605	2.5049	2.0006	1827	0.874654114	0.002020451	75.69791684	0.174862188
45.84810573	×ÔÉí³µÁ¾	Road 1	621.7856899	73.50292282	-1.38E-05	-6.101259232	0	0.764705896	639.1492	989.6738	633.9374	2.5083	1.9972	1828	0.8716894	0.002013603	75.7124414	0.17489574
45.8647833	×ÔÉí³µÁ¾	Road 1	622.1247504	73.18918076	-1.54E-05	-6.099825859	0	0.764705896	639.4348	989.6768	633.9229	2.5105	1.995	1829	0.869249184	0.002007966	75.72693837	0.174929228
45.88140112	×ÔÉí³µÁ¾	Road 1	622.460423	72.71838226	-1.70E-05	-6.099828243	0	0.764705896	639.8608	989.6816	633.901	2.5134	1.9921	1830	0.865587418	0.001999507	75.74132255	0.174962455
45.89812268	×ÔÉí³µÁ¾	Road 1	622.7965302	72.36082535	-1.85E-05	-6.052630424	0	0.75686276	640.1835	989.6846	633.8845	2.5163	1.9892	1831	0.862806419	0.001993083	75.75575002	0.174995783
45.91481125	×ÔÉí³µÁ¾	Road 1	623.1305383	72.05107269	-2.01E-05	-6.001843929	0	0.75686276	640.4647	989.6875	633.8701	2.5184	1.987	1832	0.860397232	0.001987518	75.77010881	0.175028951
45.93148846	×ÔÉí³µÁ¾	Road 1	623.4621728	71.58779297	-2.18E-05	-6.018459797	0	0.75686276	640.8841	989.6924	633.8486	2.5211	1.9843	1833	0.856793945	0.001979194	75.78439774	0.175061959
45.94814697	×ÔÉí³µÁ¾	Road 1	623.7921027	71.29973831	-2.40E-05	-6.027778149	0	0.75686276	641.0233	989.6934	633.8416	2.5227	1.9827	1834	0.85455352	0.001974019	75.79863333	0.175094843
45.96474096	×ÔÉí³µÁ¾	Road 1	624.1192246	70.96776581	-2.62E-05	-6.021356106	0	0.75686276	641.4391	989.6982	633.8203	2.5253	1.9801	1835	0.851971512	0.001968054	75.81277094	0.175127501
45.98142733	×ÔÉí³µÁ¾	Road 1	624.446013	70.502948	-2.79E-05	-6.029168606	0	0.75686276	641.8521	989.7021	633.7991	2.5288	1.9765	1836	0.848356262	0.001959703	75.82692693	0.175160201
45.99817125	×ÔÉí³µÁ¾	Road 1	624.7724845	70.19250183	-3.01E-05	-6.041251183	0	0.75686276	642.126	989.7051	633.7851	2.5309	1.9744	1837	0.845941681	0.001954125	75.84109131	0.175192921
46.01480777	×ÔÉí³µÁ¾	Road 1	625.0954248	69.88152695	-3.25E-05	-6.053471565	0	0.764705896	642.3987	989.708	633.7711	2.5329	1.9724	1838	0.843522987	0.001948538	75.85512459	0.175225338
46.03139773	×ÔÉí³µÁ¾	Road 1	625.4151963	69.38997803	-3.45E-05	-6.102514267	0	0.764705896	642.8247	989.7129	633.7494	2.5357	1.9695	1839	0.839699829	0.001939707	75.86905518	0.175257517
46.04810903	×ÔÉí³µÁ¾	Road 1	625.7358497	69.0761673	-3.62E-05	-6.111493111	0	0.764705896	643.0942	989.7158	633.7356	2.5376	1.9676	1840	0.837259079	0.001934068	75.88304687	0.175289838
46.06480126	×ÔÉí³µÁ¾	Road 1	626.0546523	68.7558815	-3.75E-05	-6.370518684	0	0.764705896	643.3625	989.7188	633.7219	2.5395	1.9656	1841	0.834767967	0.001928314	75.89698101	0.175322026
46.08143815	×ÔÉí³µÁ¾	Road 1	626.3699747	68.23156586	-3.79E-05	-6.473100185	0	0.764705896	643.7816	989.7227	633.7004	2.5432	1.9619	1842	0.830689957	0.001918894	75.9108011	0.175353951
46.09822532	×ÔÉí³µÁ¾	Road 1	626.6866204	67.90450287	-3.82E-05	-6.29033041	0	0.772549033	644.0466	989.7256	633.6869	2.5451	1.96	1843	0.828146133	0.001913018	75.92470333	0.175386065
46.11482445	×ÔÉí³µÁ¾	Road 1	626.9975765	67.43981552	-3.82E-05	-6.354252338	0	0.78039217	644.3103	989.7285	633.6734	2.5469	1.9582	1844	0.824531898	0.001904669	75.93838984	0.175417681
46.13149799	×ÔÉí³µÁ¾	Road 1	627.3082628	67.08056259	-3.82E-05	-6.56363678	0	0.78039217	644.7035	989.7324	633.6533	2.5501	1.9549	1845	0.821737709	0.001898214	75.95209112	0.17544933
46.14811801	×ÔÉí³µÁ¾	Road 1	627.616406	66.74573364	-3.82E-05	-6.483487129	0	0.796078444	644.964	989.7354	633.64	2.5519	1.9531	1846	0.819133484	0.001892198	75.96570514	0.175480779
46.16487439	×ÔÉí³µÁ¾	Road 1	627.9247381	66.2431572	-3.82E-05	-6.643390179	0	0.811764717	645.3523	989.7393	633.6201	2.555	1.95	1847	0.815224556	0.001883169	75.97936535	0.175512334
46.18141707	×ÔÉí³µÁ¾	Road 1	628.2275475	65.89706039	-3.82E-05	-6.81258297	0	0.819607854	645.6095	989.7422	633.6069	2.5567	1.9483	1848	0.812532692	0.001876951	75.99280682	0.175543384
46.19812433	×ÔÉí³µÁ¾	Road 1	628.5316302	65.52225494	-3.82E-05	-6.793328762	0	0.819607854	645.8835	989.7451	633.5929	2.5587	1.9462	1849	0.809617538	0.001870217	76.00633331	0.17557463
46.21486165	×ÔÉí³µÁ¾	Road 1	628.8346519	65.17638474	-3.82E-05	-6.71508646	0	0.827450991	646.138	989.748	633.5798	2.5604	1.9445	1850	0.806927437	0.001864002	76.01983911	0.175605828
46.2314124	×ÔÉí³µÁ¾	Road 1	629.1324808	64.78163223	-3.82E-05	-6.764118671	0	0.827450991	646.4271	989.751	633.5651	2.5627	1.9422	1851	0.80385714	0.00185691	76.03314355	0.175636562
46.24815155	×ÔÉí³µÁ¾	Road 1	629.4318504	64.38381729	-3.82E-05	-6.779334545	0	0.827450991	646.7144	989.7539	633.5504	2.5649	1.94	1852	0.800763023	0.001849763	76.04654764	0.175667525
46.26472392	×ÔÉí³µÁ¾	Road 1	629.7263074	63.96461334	-3.82E-05	-6.684782982	0	0.827450991	647.0178	989.7568	633.5349	2.5675	1.9375	1853	0.797502548	0.001842231	76.05976415	0.175698055
46.28151036	×ÔÉí³µÁ¾	Road 1	630.0219438	63.40184555	-3.82E-05	-6.67877388	0	0.827450991	647.425	989.7617	633.514	2.57	1.935	1854	0.793125465	0.00183212	76.0730779	0.17572881
46.29814101	×ÔÉí³µÁ¾	Road 1	630.31324	63.05621567	-3.82E-05	-6.751619339	0	0.827450991	647.6712	989.7637	633.5015	2.5725	1.9325	1855	0.790437233	0.00182591	76.08622339	0.175759176
46.31479256	×ÔÉí³µÁ¾	Road 1	630.6033034	62.71059265	-3.82E-05	-6.72012043	0	0.827450991	647.916	989.7666	633.4889	2.574	1.931	1856	0.787749054	0.0018197	76.09934063	0.175789477
46.33141624	×ÔÉí³µÁ¾	Road 1	630.8910708	62.31845627	-3.82E-05	-6.670084953	0	0.827450991	648.1942	989.7695	633.4747	2.576	1.9289	1857	0.784699104	0.001812655	76.11238522	0.17581961
46.34812497	×ÔÉí³µÁ¾	Road 1	631.1776998	61.75600433	-3.82E-05	-6.679434776	0	0.827450991	648.5909	989.7734	633.4543	2.5793	1.9257	1858	0.780324478	0.00180255	76.12542345	0.175849728
46.36478092	×ÔÉí³µÁ¾	Road 1	631.4618401	61.41382828	-3.82E-05	-6.659245014	0	0.827450991	648.8307	989.7764	633.4421	2.5807	1.9242	1859	0.777663109	0.001796402	76.13837617	0.175879649
46.38140974	×ÔÉí³µÁ¾	Road 1	631.7439441	61.07314224	-3.82E-05	-6.629014492	0	0.827450991	649.0691	989.7783	633.4299	2.5831	1.9218	1860	0.775013329	0.001790281	76.15126372	0.175909419
46.39809941	×ÔÉí³µÁ¾	Road 1	632.0246037	60.53892517	-3.82E-05	-6.639391422	0	0.827450991	649.4411	989.7822	633.4109	2.5859	1.9189	1861	0.770858307	0.001780683	76.16412909	0.175939138
46.41578537	×ÔÉí³µÁ¾	Road 1	632.3203423	60.19794388	-3.82E-05	-6.647267818	0	0.827450991	649.6761	989.7852	633.3989	2.5872	1.9175	1862	0.76820623	0.001774556	76.17771556	0.175970523
46.43146078	×ÔÉí³µÁ¾	Road 1	632.5802384	59.68751907	-3.82E-05	-6.620398521	0	0.827450991	650.0261	989.7891	633.381	2.5897	1.915	1863	0.764236259	0.001765386	76.18969528	0.175998196
46.44814935	×ÔÉí³µÁ¾	Road 1	632.8553592	59.34810333	-3.83E-05	-6.615393162	0	0.827450991	650.2578	989.791	633.3691	2.592	1.9128	1864	0.761596359	0.001759288	76.20240523	0.176027556
46.46472685	×ÔÉí³µÁ¾	Road 1	633.1270859	59.00863953	-3.88E-05	-6.627036572	0	0.827450991	650.4882	989.7939	633.3573	2.5933	1.9115	1865	0.758956085	0.001753189	76.21498683	0.17605662
46.48175888	×ÔÉí³µÁ¾	Road 1	633.4038501	58.49867477	-3.95E-05	-6.624040604	0	0.827450991	650.8313	989.7969	633.3397	2.5967	1.9082	1866	0.754989693	0.001744026	76.22784583	0.176086324
46.49808273	×ÔÉí³µÁ¾	Road 1	633.6675677	58.15929337	-4.03E-05	-6.613626957	0	0.827450991	651.0583	989.7998	633.3282	2.5979	1.907	1867	0.75235006	0.001737929	76.24012708	0.176114694
46.51475773	×ÔÉí³µÁ¾	Road 1	633.9352752	57.77167511	-4.15E-05	-6.614892006	0	0.827450991	651.2841	989.8018	633.3166	2.6001	1.9049	1868	0.749523666	0.0017314	76.25262539	0.176143565
46.53143714	×ÔÉí³µÁ¾	Road 1	634.2006956	57.28702354	-4.28E-05	-6.61248827	0	0.827450991	651.6362	989.8057	633.2986	2.6027	1.9024	1869	0.745565739	0.001722257	76.26506098	0.176172291
46.54813011	×ÔÉí³µÁ¾	Road 1	634.4647612	56.94832191	-4.43E-05	-6.597353935	0	0.827450991	651.8586	989.8076	633.2872	2.6049	1.9003	1870	0.742931393	0.001716172	76.27746271	0.176200939
46.56482161	×ÔÉí³µÁ¾	Road 1	634.7269012	56.53798256	-4.60E-05	-6.586207867	0	0.827450991	652.0796	989.8105	633.2759	2.606	1.8992	1871	0.739739864	0.001708799	76.28981008	0.176229461
46.58141194	×ÔÉí³µÁ¾	Road 1	634.985452	56.10394707	-4.82E-05	-6.581703186	0	0.827450991	652.4087	989.8135	633.259	2.6091	1.8962	1872	0.736364033	0.001701001	76.30202661	0.176257681
46.59809867	×ÔÉí³µÁ¾	Road 1	635.2439417	55.76660843	-4.98E-05	-6.574872017	0	0.827450991	652.6265	989.8164	633.2479	2.6101	1.8952	1873	0.733740288	0.00169494	76.31427034	0.176285964
46.61476635	×ÔÉí³µÁ¾	Road 1	635.5003536	55.3575943	-5.22E-05	-6.564834595	0	0.827450991	652.8583	989.8184	633.236	2.6122	1.8929	1874	0.730746014	0.001688023	76.32645017	0.1763141
46.63138161	×ÔÉí³µÁ¾	Road 1	635.7537448	54.90183678	-5.47E-05	-6.522061348	0	0.819607854	653.1804	989.8223	633.2196	2.614	1.891	1875	0.727014286	0.001679403	76.3385297	0.176342004
46.64814129	×ÔÉí³µÁ¾	Road 1	636.0077887	54.56894417	-5.73E-05	-6.46568203	0	0.819607854	653.3934	989.8242	633.2087	2.6158	1.8891	1876	0.724425121	0.001673422	76.35067084	0.17637005
46.66482216	×ÔÉí³µÁ¾	Road 1	636.2584455	54.09577332	-6.00E-05	-6.457492352	0	0.819607854	653.6203	989.8262	633.1971	2.6179	1.8869	1877	0.720744904	0.001664921	76.36269349	0.176397822
46.71479109	×ÔÉí³µÁ¾	Road 1	636.9931821	52.93392105	-6.28E-05	-6.481578827	0	0.819607854	654.4247	989.835	633.1559	2.6235	1.8811	1878	0.711708275	0.001644046	76.39825679	0.176479973
46.76482637	×ÔÉí³µÁ¾	Road 1	637.7135257	51.82816772	-6.56E-05	-6.35881567	0	0.811764717	655.1093	989.8428	633.1209	2.6281	1.8765	1879	0.703107971	0.001624179	76.433437	0.176561239
46.81480814	×ÔÉí³µÁ¾	Road 1	638.4168533	50.65806541	-7.41E-05	-5.915585041	0	0.764705896	655.8643	989.8506	633.0823	2.634	1.8706	1880	0.694007175	0.001603157	76.4681247	0.176641368
46.8313904	×ÔÉí³µÁ¾	Road 1	638.6488014	50.35578346	-8.20E-05	-5.694065094	0	0.654901981	656.0609	989.8525	633.0722	2.6356	1.869	1881	0.691656094	0.001597726	76.47959393	0.176667862
46.84807054	×ÔÉí³µÁ¾	Road 1	638.8809165	50.09638252	-9.17E-05	-4.222002506	0	0.458823532	656.2564	989.8545	633.0623	2.6372	1.8674	1882	0.689638531	0.001593065	76.49109719	0.176694435
46.86471549	×ÔÉí³µÁ¾	Road 1	639.1115345	49.87848587	-9.54E-05	-1.526079416	0	0.380392164	656.5621	989.8574	633.0466	2.6398	1.8648	1883	0.687943779	0.00158915	76.50254798	0.176720886
46.88139306	×ÔÉí³µÁ¾	Road 1	639.3422063	49.79251785	-9.91E-05	-1.789905906	0	0.31764707	656.7701	989.8604	633.0359	2.6407	1.864	1884	0.687275139	0.001587606	76.51401006	0.176747363
46.96480584	×ÔÉí³µÁ¾	Road 1	640.4800637	49.10861893	-0.000103102	-2.241531372	0	0.239215687	657.8974	989.8721	632.9782	2.6494	1.8552	1885	0.681955925	0.001575318	76.5708939	0.176878765
46.9815274	×ÔÉí³µÁ¾	Road 1	640.7074789	48.96044426	-0.000107802	-1.35997653	0	0.176470593	658.1837	989.875	632.9636	2.6517	1.853	1886	0.680803455	0.001572656	76.582278	0.176905062
47.06473968	×ÔÉí³µÁ¾	Road 1	641.8382159	48.91889877	-0.000124115	-0.574480474	0	0.011764706	659.1498	989.8848	632.9142	2.6594	1.8454	1887	0.680480324	0.00157191	76.63890232	0.177035864
47.08148507	×ÔÉí³µÁ¾	Road 1	642.0655536	48.87411232	-0.000126638	0.130027279	0	0.011764706	659.5305	989.8887	632.8947	2.6624	1.8424	1888	0.680131985	0.001571105	76.65029139	0.177062173
47.09812965	×ÔÉí³µÁ¾	Road 1	642.2915763	48.88568573	-0.000129429	0.449317783	0	0.011764706	659.7208	989.8906	632.885	2.6639	1.841	1889	0.973940822	0.002249803	76.66650222	0.17709962
47.11476983	×ÔÉí³µÁ¾	Road 1	642.5176059	48.90010185	-0.000129429	0.049338188	0	0.011764706	660.0064	989.8936	632.8704	2.6662	1.8388	1890	1.046391473	0.002417164	76.68391437	0.177139842
47.13140855	×ÔÉí³µÁ¾	Road 1	642.7435605	48.88817139	-0.000130604	-0.128319249	0	0.011764706	660.1968	989.8965	632.8606	2.6667	1.8383	1891	0.680241333	0.001571357	76.69523271	0.177165988
47.14803737	×ÔÉí³µÁ¾	Road 1	642.9693056	48.87192535	-0.000132023	-0.143679991	0	0.011764706	660.3871	989.8984	632.8508	2.6682	1.8368	1892	0.680114975	0.001571066	76.70654222	0.177192113
47.16473583	×ÔÉí³µÁ¾	Road 1	643.1959868	48.86989975	-0.000133931	0.276893616	0	0.011764706	660.6725	989.9014	632.8363	2.6704	1.8346	1893	0.68009922	0.001571029	76.71789884	0.177218346
47.1814409	×ÔÉí³µÁ¾	Road 1	643.4228068	48.88051186	-0.000136827	0.313757002	0	0.011764706	660.8629	989.9033	632.8265	2.6719	1.8331	1894	0.948503018	0.002191042	76.73374364	0.177254948
47.19808364	×ÔÉí³µÁ¾	Road 1	643.648798	48.88423691	-0.000139273	0.111270696	0	0.011764706	661.1484	989.9063	632.812	2.6742	1.8309	1895	0.774763136	0.001789703	76.74663783	0.177284733
47.21473812	×ÔÉí³µÁ¾	Road 1	643.8749114	48.87625122	-0.000141747	-0.059215862	0	0.011764706	661.3387	989.9082	632.8022	2.6757	1.8294	1896	0.680148621	0.001571143	76.75796535	0.1773109
47.2314036	×ÔÉí³µÁ¾	Road 1	644.1011493	48.87088165	-0.000144755	0.079470575	0	0.011764706	661.529	989.9102	632.7925	2.6772	1.8279	1897	0.680106857	0.001571047	76.76929965	0.177337082
47.24817024	×ÔÉí³µÁ¾	Road 1	644.3287996	48.8792347	-0.000148061	0.255420148	0	0.011764706	661.8281	989.9131	632.7772	2.6797	1.8254	1898	0.890597554	0.00205728	76.78423198	0.177371576
47.26476901	×ÔÉí³µÁ¾	Road 1	644.554206	48.88698006	-0.000153245	0.211485475	0	0.011764706	662.0184	989.915	632.7675	2.6812	1.8239	1899	0.877355297	0.002026691	76.798795	0.177405216
47.28141175	×ÔÉí³µÁ¾	Road 1	644.7802147	48.88802376	-0.000160434	0.07209979	0	0.011764706	662.2087	989.917	632.7577	2.6827	1.8224	1900	0.706735066	0.001632558	76.81055701	0.177432387
47.29808713	×ÔÉí³µÁ¾	Road 1	645.0066459	48.88360863	-0.000168681	0.083425499	0	0.011764706	662.4943	989.9199	632.743	2.685	1.8201	1901	0.680205845	0.001571276	76.8218997	0.177458588
47.31484717	×ÔÉí³µÁ¾	Road 1	645.2342357	48.88550377	-0.000176917	0.209400892	0	0.011764706	662.6846	989.9219	632.7333	2.6866	1.8186	1902	0.727990133	0.001681657	76.83410085	0.177486773
47.33139975	×ÔÉí³µÁ¾	Road 1	645.4590412	48.89267921	-0.000183932	0.271549344	0	0.011764706	662.8749	989.9238	632.7236	2.6881	1.8171	1903	0.863426962	0.001994516	76.84839279	0.177519787
47.34808539	×ÔÉí³µÁ¾	Road 1	645.6856948	48.90150948	-0.000190827	0.162042215	0	0.011764706	663.1606	989.9268	632.709	2.6904	1.8148	1904	0.903973425	0.002088179	76.86347616	0.17755463
47.36481757	×ÔÉí³µÁ¾	Road 1	645.9129832	48.90205536	-0.000198515	0.10199777	0	0.011764706	663.351	989.9297	632.6993	2.691	1.8143	1905	0.694136792	0.001603456	76.87509059	0.177581459
47.38142733	×ÔÉí³µÁ¾	Road 1	646.1386095	48.90225105	-0.000208009	0.139341027	0	0.011764706	663.5414	989.9316	632.6895	2.6925	1.8128	1906	0.68532999	0.001583112	76.88647375	0.177607754
47.39809537	×ÔÉí³µÁ¾	Road 1	646.3650497	48.90704384	-0.000215819	0.235719964	0	0.011764706	663.7454	989.9336	632.6791	2.6943	1.811	1907	0.801913388	0.00185242	76.89984008	0.177638631
47.41477551	×ÔÉí³µÁ¾	Road 1	646.5917097	48.91902237	-0.000224159	0.261188626	0	0.011764706	664.0447	989.9365	632.6638	2.6968	1.8085	1908	0.984039188	0.002273131	76.91625399	0.177676547
47.43136951	×ÔÉí³µÁ¾	Road 1	646.8172266	48.92498245	-0.000230984	0.199679106	0	0.011764706	664.2352	989.9385	632.654	2.6984	1.807	1909	0.832378954	0.001922795	76.93006648	0.177708454
47.44804928	×ÔÉí³µÁ¾	Road 1	647.0439334	48.93018723	-0.000236543	0.188352779	0	0.011764706	664.5209	989.9414	632.6394	2.7007	1.8048	1910	0.812508738	0.001876895	76.94361894	0.17773976
47.46479613	×ÔÉí³µÁ¾	Road 1	647.2715777	48.93575249	-0.000241834	0.250504524	0	0.011764706	664.7115	989.9434	632.6296	2.7022	1.8033	1911	0.821140761	0.001896835	76.95737046	0.177771526
47.48145244	×ÔÉí³µÁ¾	Road 1	647.4980333	48.94481277	-0.000246484	0.294989556	0	0.011764706	664.9156	989.9453	632.6192	2.704	1.8015	1912	0.910742684	0.002103816	76.97254007	0.177806568
47.49804571	×ÔÉí³µÁ¾	Road 1	647.723673	48.9537632	-0.000250828	0.272168487	0	0.011764706	665.1063	989.9482	632.6095	2.7045	1.801	1913	0.908928142	0.002099624	76.98762216	0.177841407
47.51475993	×ÔÉí³µÁ¾	Road 1	647.9510017	48.96328354	-0.00025633	0.214610443	0	0.011764706	665.3922	989.9512	632.5948	2.7068	1.7987	1914	0.921820235	0.002129405	77.00302967	0.177876999
47.53145363	×ÔÉí³µÁ¾	Road 1	648.1780926	48.9721962	-0.000259297	0.253461987	0	0.011764706	665.6782	989.9541	632.5802	2.709	1.7964	1915	0.906826859	0.00209477	77.01816797	0.177911968
47.54812607	×ÔÉí³µÁ¾	Road 1	648.4049323	48.98041878	-0.000262662	0.290085733	0	0.011764706	665.8689	989.9561	632.5704	2.7105	1.7949	1916	0.88969993	0.002055207	77.03300144	0.177946233
47.56470797	×ÔÉí³µÁ¾	Road 1	648.6305853	48.99021034	-0.000264921	0.286284745	0	0.011764706	666.0733	989.958	632.56	2.7122	1.7932	1917	0.931010054	0.002150633	77.04843935	0.177981895
47.58142	×ÔÉí³µÁ¾	Road 1	648.858049	48.99879341	-0.000266814	0.252586752	0	0.011764706	666.2776	989.96	632.5495	2.714	1.7914	1918	0.898558935	0.002075671	77.06345609	0.178016584
47.59803159	×ÔÉí³µÁ¾	Road 1	649.084176	49.00536804	-0.000268335	0.238664463	0	0.011764706	666.4685	989.9619	632.5398	2.7155	1.7899	1919	0.84875813	0.001960631	77.07755532	0.178049153
47.61473996	×ÔÉí³µÁ¾	Road 1	649.3116788	49.01797829	-0.000270244	0.278025061	0	0.011764706	666.7957	989.9658	632.523	2.7175	1.7879	1920	1.000921161	0.002312128	77.09427907	0.178087785
47.631511	×ÔÉí³µÁ¾	Road 1	649.5400582	49.02293243	-0.000271777	0.288741589	0	0.011764706	666.9047	989.9668	632.5175	2.7185	1.7869	1921	0.806430352	0.001862854	77.10780375	0.178119027
47.64812259	×ÔÉí³µÁ¾	Road 1	649.766319	49.03437881	-0.000272931	0.279184282	0	0.011764706	667.1501	989.9697	632.5049	2.72	1.7853	1922	0.973336209	0.002248407	77.12397241	0.178156376
47.66473638	×ÔÉí³µÁ¾	Road 1	649.9926702	49.04746971	-0.000275249	0.255473286	0	0.011764706	667.4775	989.9727	632.4882	2.723	1.7823	1923	1.015423301	0.002345628	77.14084244	0.178195346
47.6813707	×ÔÉí³µÁ¾	Road 1	650.2193383	49.05550346	-0.000277191	0.265740454	0	0.011764706	667.6821	989.9746	632.4777	2.7247	1.7805	1924	0.886271462	0.002047287	77.15558497	0.178229401
47.6980534	×ÔÉí³µÁ¾	Road 1	650.4467038	49.06374664	-0.000279533	0.282948881	0	0.011764706	667.8732	989.9766	632.4679	2.7262	1.779	1925	0.891098011	0.002058436	77.17045089	0.178263742
47.71476177	×ÔÉí³µÁ¾	Road 1	650.67446	49.07258034	-0.000281888	0.285196126	0	0.011764706	668.0642	989.9795	632.4581	2.7267	1.7785	1926	0.905868244	0.002092556	77.18558646	0.178298705
47.73143237	×ÔÉí³µÁ¾	Road 1	650.9017647	49.08619995	-0.000284256	0.265371054	0	0.011764706	668.3782	989.9824	632.4421	2.7295	1.7757	1927	1.028299356	0.002375372	77.20272884	0.178338304
47.74806413	×ÔÉí³µÁ¾	Road 1	651.128575	49.09386635	-0.000287434	0.263133556	0	0.011764706	668.5693	989.9844	632.4323	2.731	1.7742	1928	0.877392007	0.002026776	77.21732141	0.178372012
47.76468965	×ÔÉí³µÁ¾	Road 1	651.3553563	49.10600624	-0.000290636	0.279812723	0	0.011764706	668.8561	989.9873	632.4176	2.7332	1.7719	1929	0.991772788	0.002290995	77.23381014	0.178410101
47.78140681	×ÔÉí³µÁ¾	Road 1	651.583428	49.11467514	-0.000293457	0.283691555	0	0.011764706	669.0474	989.9893	632.4078	2.7347	1.7704	1930	0.902086509	0.00208382	77.24889047	0.178444937
47.79811517	×ÔÉí³µÁ¾	Road 1	651.8114196	49.12329941	-0.000296703	0.276916295	0	0.011764706	669.2386	989.9912	632.3981	2.7362	1.7689	1931	0.901174336	0.002081713	77.26394762	0.178479719
47.81469304	×ÔÉí³µÁ¾	Road 1	652.0376861	49.1353466	-0.000297927	0.267983317	0	0.011764706	669.5256	989.9941	632.3834	2.7385	1.7666	1932	0.990703517	0.002288525	77.28037137	0.178517658
47.83147544	×ÔÉí³µÁ¾	Road 1	652.2667764	49.14224396	-0.000299974	0.269258052	0	0.011764706	669.6212	989.9951	632.3785	2.7392	1.7658	1933	0.856745732	0.001979083	77.29474962	0.178550872
47.84806981	×ÔÉí³µÁ¾	Road 1	652.4933461	49.15229645	-0.000299974	0.280168563	0	0.011764706	669.9219	989.999	632.3631	2.7407	1.7643	1934	0.939587165	0.002170446	77.31034147	0.178586889
47.86472025	×ÔÉí³µÁ¾	Road 1	652.7207214	49.16089325	-0.000299974	0.280867606	0	0.011764706	670.1133	990.001	632.3533	2.7423	1.7627	1935	0.901696442	0.002082919	77.32535512	0.17862157
47.88144584	×ÔÉí³µÁ¾	Road 1	652.9491678	49.17058525	-0.000299974	0.274501711	0	0.011764706	670.3321	990.0029	632.3422	2.7443	1.7607	1936	0.928648969	0.002145179	77.34088733	0.17865745
47.89811865	×ÔÉí³µÁ¾	Road 1	653.1769387	49.18040771	-0.000299974	0.270755261	0	0.011764706	670.5646	990.0059	632.3302	2.7455	1.7594	1937	0.932879221	0.002154951	77.35644104	0.178693379
47.9147504	×ÔÉí³µÁ¾	Road 1	653.4042143	49.19457321	-0.000299974	0.277432144	0	0.011764706	670.8929	990.0088	632.3134	2.7485	1.7564	1938	1.044668573	0.002413184	77.37381571	0.178733514
47.93138545	×ÔÉí³µÁ¾	Road 1	653.6315767	49.20361633	-0.000299974	0.280052513	0	0.011764706	671.0982	990.0117	632.3029	2.7493	1.7556	1939	0.913829067	0.002110945	77.3890173	0.17876863
47.94808539	×ÔÉí³µÁ¾	Road 1	653.8598627	49.21155052	-0.000299974	0.277326256	0	0.011764706	671.2761	990.0127	632.2938	2.7515	1.7533	1940	0.884794428	0.002043875	77.40379331	0.178802763
47.96476882	×ÔÉí³µÁ¾	Road 1	654.0879642	49.22041512	-0.000299974	0.273281038	0	0.011764706	671.4814	990.0156	632.2833	2.7523	1.7525	1941	0.908817153	0.002099368	77.4189555	0.178837787
47.98138518	×ÔÉí³µÁ¾	Road 1	654.3151916	49.22971573	-0.000299974	0.274419606	0	0.011764706	671.7005	990.0176	632.2721	2.7543	1.7505	1942	0.921006402	0.002127525	77.43425927	0.178873139
47.99812287	×ÔÉí³µÁ¾	Road 1	654.5441255	49.23989868	-0.000299974	0.277746201	0	0.011764706	671.9333	990.0205	632.2603	2.7556	1.7492	1943	0.941836161	0.002175642	77.45002343	0.178909554
48.01477001	×ÔÉí³µÁ¾	Road 1	654.7718681	49.2500885	-0.000299974	0.278308809	0	0.011764706	672.1661	990.0225	632.2483	2.7579	1.7469	1944	0.943552665	0.002179607	77.46573089	0.178945838
48.03138197	×ÔÉí³µÁ¾	Road 1	654.9991739	49.2597496	-0.000299974	0.275652587	0	0.011764706	672.3853	990.0254	632.2371	2.7599	1.7459	1945	0.930684551	0.002149881	77.48119139	0.178981552
48.04804488	×ÔÉí³µÁ¾	Road 1	655.227234	49.27207489	-0.000299974	0.274663508	0	0.011764706	672.673	990.0283	632.2224	2.7621	1.7436	1946	0.998151244	0.002305729	77.49782349	0.179019972
48.06468946	×ÔÉí³µÁ¾	Road 1	655.4550814	49.28035583	-0.000299974	0.276721269	0	0.011764706	672.8649	990.0303	632.2125	2.7636	1.7421	1947	0.895155757	0.00206781	77.51272298	0.17905439
48.08136777	×ÔÉí³µÁ¾	Road 1	655.6834322	49.28935432	-0.000299974	0.277859837	0	0.011764706	673.0706	990.0322	632.202	2.7654	1.7403	1948	0.913158566	0.002109396	77.52795292	0.179089571
48.09805047	×ÔÉí³µÁ¾	Road 1	655.9119102	49.30379791	-0.000299974	0.27595225	0	0.011764706	673.3996	990.0361	632.1852	2.7675	1.7382	1949	1.052314351	0.002430846	77.54550837	0.179130124
48.11478339	×ÔÉí³µÁ¾	Road 1	656.1411144	49.31208572	-0.000299974	0.275173336	0	0.011764706	673.5916	990.0381	632.1754	2.769	1.7367	1950	0.894594575	0.002066513	77.56047755	0.179164703
48.13143787	×ÔÉí³µÁ¾	Road 1	656.369285	49.32090569	-0.000299974	0.275353432	0	0.011764706	673.7974	990.04	632.1649	2.7707	1.7349	1951	0.909311888	0.00210051	77.57562166	0.179199686
48.14804543	×ÔÉí³µÁ¾	Road 1	656.5968569	49.33048439	-0.000301206	0.276711702	0	0.011764706	673.9894	990.042	632.155	2.7722	1.7334	1952	0.929541167	0.00214724	77.59105907	0.179235346
48.16470467	×ÔÉí³µÁ¾	Road 1	656.8251895	49.34181061	-0.000302855	0.277360588	0	0.011764706	674.2775	990.0449	632.1403	2.7745	1.731	1953	0.973642709	0.002249115	77.60727923	0.179272815
48.19803049	×ÔÉí³µÁ¾	Road 1	657.2821422	49.36202545	-0.00030617	0.275702447	0	0.011764706	674.7443	990.0498	632.1164	2.7781	1.7275	1954	0.942632933	0.002177482	77.63869324	0.179345381
48.21474619	×ÔÉí³µÁ¾	Road 1	657.5113812	49.37038536	-0.000311188	0.275802672	0	0.011764706	674.9365	990.0527	632.1066	2.7786	1.7269	1955	0.897355284	0.002072891	77.65369316	0.179380031
48.23137391	×ÔÉí³µÁ¾	Road 1	657.7394713	49.38285141	-0.000325702	0.277669996	0	0.011764706	675.2249	990.0557	632.0918	2.7809	1.7246	1956	1.004000819	0.002319242	77.6703874	0.179418595
48.24802949	×ÔÉí³µÁ¾	Road 1	657.9679824	49.39126968	-0.000336215	0.276142001	0	0.011764706	675.4172	990.0576	632.082	2.7825	1.723	1957	0.899873884	0.002078709	77.68537532	0.179453217
48.26479503	×ÔÉí³µÁ¾	Road 1	658.1980405	49.39946823	-0.0003465	0.275792837	0	0.011764706	675.6095	990.0596	632.0721	2.784	1.7215	1958	0.892964241	0.002062747	77.70034635	0.1794878
48.28140736	×ÔÉí³µÁ¾	Road 1	658.4260592	49.41316681	-0.000359764	0.275931925	0	0.011764706	675.9255	990.0625	632.0559	2.7868	1.7187	1959	1.036404	0.002394093	77.71756343	0.179527572
48.29808126	×ÔÉí³µÁ¾	Road 1	658.6549619	49.42151299	-0.000374312	0.276767582	0	0.011764706	676.118	990.0654	632.0461	2.7874	1.7181	1960	0.898157489	0.002074744	77.73253923	0.179562166
48.31471338	×ÔÉí³µÁ¾	Road 1	658.8833301	49.42997589	-0.000389248	0.276214033	0	0.011764706	676.3104	990.0674	632.0363	2.7889	1.7166	1961	0.901794623	0.002083146	77.74753798	0.179596813
48.33138032	×ÔÉí³µÁ¾	Road 1	659.1122338	49.44239731	-0.000409099	0.276064277	0	0.011764706	676.5991	990.0703	632.0215	2.7912	1.7143	1962	1.002952098	0.002316819	77.76425413	0.179635427
48.34809162	×ÔÉí³µÁ¾	Road 1	659.3417853	49.45071259	-0.000427013	0.275598735	0	0.011764706	676.7917	990.0723	632.0117	2.7928	1.7127	1963	0.897242318	0.00207263	77.77924821	0.179670063
48.36476039	×ÔÉí³µÁ¾	Road 1	659.5708101	49.4630928	-0.000443311	0.275365114	0	0.011764706	677.0806	990.0752	631.9968	2.7951	1.7104	1964	1.002155084	0.002314978	77.7959529	0.179708651
48.38145996	×ÔÉí³µÁ¾	Road 1	659.8002773	49.46726418	-0.000456752	0.276653469	0	0.011764706	677.1768	990.0762	631.9919	2.7959	1.7096	1965	0.7915245	0.001828422	77.80917102	0.179739185
48.39803819	×ÔÉí³µÁ¾	Road 1	660.028146	49.48220215	-0.000470461	0.275518864	0	0.011764706	677.5209	990.0801	631.9744	2.7982	1.7073	1966	1.070117971	0.002471973	77.82691169	0.179780166
48.41472419	×ÔÉí³µÁ¾	Road 1	660.2575342	49.49043159	-0.000486705	0.276188076	0	0.011764706	677.7136	990.082	631.9645	2.7998	1.7057	1967	0.895844951	0.002069402	77.84185976	0.179814696
48.43142266	×ÔÉí³µÁ¾	Road 1	660.4871351	49.49934082	-0.000502161	0.275713295	0	0.011764706	677.92	990.084	631.9539	2.8016	1.7039	1968	0.91320596	0.002109506	77.85710889	0.179849922
48.44801592	×ÔÉí³µÁ¾	Road 1	660.7153471	49.5118515	-0.000518532	0.275852621	0	0.011764706	678.2092	990.0879	631.9391	2.8029	1.7026	1969	1.007656593	0.002327687	77.87382921	0.179888545
48.46473528	×ÔÉí³µÁ¾	Road 1	660.9453316	49.52011185	-0.000532242	0.276111335	0	0.011764706	678.402	990.0898	631.9293	2.8045	1.701	1970	0.89657201	0.002071081	77.88881932	0.179923173
48.48136447	×ÔÉí³µÁ¾	Road 1	661.1741336	49.53260193	-0.000546192	0.275392175	0	0.011764706	678.6912	990.0928	631.9144	2.8068	1.6987	1971	1.006725967	0.002325537	77.90556035	0.179961844
48.49807356	×ÔÉí³µÁ¾	Road 1	661.4040735	49.54090347	-0.000558518	0.275338322	0	0.011764706	678.8842	990.0947	631.9046	2.8083	1.6972	1972	0.898007857	0.002074398	77.92056525	0.179996506
48.51474161	×ÔÉí³µÁ¾	Road 1	661.6334866	49.54916039	-0.000572921	0.275997937	0	0.011764706	679.077	990.0967	631.8948	2.8099	1.6956	1973	0.897485077	0.002073191	77.93552457	0.180031062
48.53158523	×ÔÉí³µÁ¾	Road 1	661.8653749	49.56165047	-0.000586287	0.274874598	0	0.011764706	679.3665	990.1006	631.88	2.8112	1.6943	1974	1.003045402	0.002317035	77.95241948	0.180070089
48.54809382	×ÔÉí³µÁ¾	Road 1	662.092691	49.57042923	-0.000599207	0.311094731	0	0	679.5594	990.1025	631.8701	2.8128	1.6927	1975	0.913330408	0.002109793	77.96749728	0.180104919
48.56472154	×ÔÉí³µÁ¾	Road 1	662.3217055	49.58300514	-0.000608363	0.402011126	0	0	679.7525	990.1045	631.8602	2.8143	1.6912	1976	1.009684823	0.002332372	77.98428604	0.180143701
48.58136758	×ÔÉí³µÁ¾	Road 1	662.5510836	49.60703773	-0.000614961	0.419694722	0.011764706	0	680.0422	990.1074	631.8453	2.8167	1.6888	1977	1.304618676	0.003013669	78.00600278	0.180193866
48.598106	×ÔÉí³µÁ¾	Road 1	662.7817991	49.62092857	-0.000618277	0.360249102	0.019607844	0	680.2354	990.1094	631.8354	2.8182	1.6873	1978	1.041761182	0.002406468	78.02344022	0.180234147
48.61475132	×ÔÉí³µÁ¾	Road 1	663.0113119	49.63834534	-0.000623608	0.345169216	0.035294119	0	680.5253	990.1133	631.8207	2.8196	1.6859	1979	1.134851951	0.002621508	78.04233019	0.180277783
48.63140983	×ÔÉí³µÁ¾	Road 1	663.2410393	49.64541779	-0.000624276	0.367251158	0.043137256	0	680.6219	990.1143	631.8157	2.8204	1.6851	1980	0.868266647	0.002005696	78.05679422	0.180311195
48.64812076	×ÔÉí³µÁ¾	Road 1	663.4715874	49.6664978	-0.000626285	0.421817243	0.043137256	0	680.9119	990.1172	631.8009	2.8227	1.6828	1981	1.227615847	0.002835793	78.07730882	0.180358583
48.66471329	×ÔÉí³µÁ¾	Road 1	663.7005733	49.68194046	-0.000628969	0.411054164	0.043137256	0	681.1053	990.1191	631.791	2.8243	1.6812	1982	1.085948849	0.002508542	78.09532746	0.180400206
48.68141982	×ÔÉí³µÁ¾	Road 1	663.9312394	49.70499458	-0.000628969	0.376348913	0.043137256	0	681.4232	990.123	631.7748	2.8261	1.6794	1983	1.279212189	0.00295498	78.11669865	0.180449574
48.69803288	×ÔÉí³µÁ¾	Road 1	664.1606778	49.71862106	-0.000629642	0.389635831	0.035294119	0	681.6168	990.125	631.7649	2.8277	1.6778	1984	1.039076683	0.002400267	78.13396089	0.18048945
48.71470275	×ÔÉí³µÁ¾	Road 1	664.3909688	49.73327751	-0.000629642	0.413507372	0.035294119	0	681.8104	990.127	631.7549	2.8293	1.6763	1985	1.064640979	0.002459321	78.15170832	0.180530446
48.73135796	×ÔÉí³µÁ¾	Road 1	664.6211345	49.7499836	-0.000631661	0.420458227	0.035294119	0	682.0179	990.1289	631.7443	2.8311	1.6745	1986	1.118123287	0.002582865	78.1703309	0.180573464
48.7480436	×ÔÉí³µÁ¾	Road 1	664.8518064	49.76848526	-0.000632336	0.403150201	0.035294119	0	682.2532	990.1318	631.7322	2.8324	1.6732	1987	1.163908499	0.002688629	78.18975146	0.180618326
48.76471457	×ÔÉí³µÁ¾	Road 1	665.0823892	49.7930294	-0.000637747	0.397538036	0.035294119	0	682.5854	990.1357	631.7153	2.8355	1.6711	1988	1.320654878	0.003050713	78.21176806	0.180669184
48.78134559	×ÔÉí³µÁ¾	Road 1	665.312488	49.80787125	-0.000643189	0.410551369	0.035294119	0	682.7794	990.1377	631.7053	2.8371	1.6695	1989	1.071468858	0.002475093	78.22958768	0.180710348
48.79806568	×ÔÉí³µÁ¾	Road 1	665.5438904	49.82320061	-0.000650035	0.41924113	0.035294119	0	682.9734	990.1396	631.6954	2.8387	1.668	1990	1.082210223	0.002499906	78.24768233	0.180752146
48.81467911	×ÔÉí³µÁ¾	Road 1	665.7739282	49.84739456	-0.000657622	0.40985024	0.035294119	0	683.2783	990.1436	631.6798	2.8403	1.6664	1991	1.31489001	0.003037396	78.26952716	0.180802608
48.83135815	×ÔÉí³µÁ¾	Road 1	666.004943	49.86219521	-0.000668062	0.403688133	0.035294119	0	683.4724	990.1455	631.6699	2.8419	1.6648	1992	1.07013932	0.002472022	78.28737605	0.180843839
48.8480841	×ÔÉí³µÁ¾	Road 1	666.2366765	49.87700615	-0.000677199	0.407104015	0.035294119	0	683.6666	990.1475	631.6599	2.8435	1.6633	1993	1.069560648	0.002470685	78.30526548	0.180885163
48.86476681	×ÔÉí³µÁ¾	Road 1	666.4679219	49.90097694	-0.000689272	0.418061137	0.035294119	0	683.9719	990.1514	631.6443	2.8451	1.6617	1994	1.307607921	0.003020574	78.32707992	0.180935555
48.88138353	×ÔÉí³µÁ¾	Road 1	666.6983244	49.9165226	-0.000703659	0.417721838	0.035294119	0	684.1662	990.1533	631.6344	2.8467	1.6601	1995	1.091748714	0.00252194	78.3452212	0.180977461
48.89802518	×ÔÉí³µÁ¾	Road 1	666.9291785	49.93944969	-0.000715312	0.412685543	0.035294119	0	684.4578	990.1563	631.6195	2.849	1.6578	1996	1.282860247	0.002963407	78.36657011	0.181026777
48.91473427	×ÔÉí³µÁ¾	Road 1	667.1610378	49.95443573	-0.000727092	0.410533667	0.035294119	0	684.6523	990.1582	631.6095	2.8506	1.6562	1997	1.075663606	0.002484783	78.38454348	0.181068295
[truncated: 2,158 more rows]
