# Supplementary material for: Influence of Landscape Design on Driving Behavior Based on Slope Illusion
Source: Hindawi journal article supplement (doi:10.1155/2022/6407145), 2022-01-12
Supplement: f1 [file 6407145.f1.zip › 6.txt]

CO2 emission report
0.3	0.028	0.056	0.00231
Time(s)	Vehicle Name	Road Name	Travelled Distance (m)	Speed(km/h)	Steering Wheel Angle(-1..1)	Acceleration(m/s^2)	Accelerate (0..1)	Brake (0..1)	X Pos(m)	Y Pos(m)	Z Pos(m)	Distance to the left border(m)	Distance to the right border(m)	Measurement Point Number	Gasoline Consumption(cc/sec)	Carbon Dioxide Emission(kg/sec)	Progressive Gasoline Consumption(cc)	Progressive Carbon Dioxide Emission(kg)
0	×ÔÉí³µÁ¾	Road 1	0	0	0.004395277	0	0	0.913725495	27.9737	977.2227	655.7363	3.8698	0.6318	1	0	0	0	0
0.015890209	×ÔÉí³µÁ¾	Road 1	0	0	0.004395277	0	0	0.913725495	27.9737	977.2227	655.7363	3.8698	0.6318	2	0.3	0.000693	0.004767063	1.10E-05
0.065954082	×ÔÉí³µÁ¾	Road 1	0	0	0.004395277	0	0	0.913725495	27.9737	977.2227	655.7363	3.8698	0.6318	3	0.3	0.000693	0.019786224	4.57E-05
0.13269296	×ÔÉí³µÁ¾	Road 1	0	0	0.004395277	0	0	0.913725495	27.9737	977.2227	655.7363	3.8698	0.6318	4	0.3	0.000693	0.039807888	9.20E-05
0.149325445	×ÔÉí³µÁ¾	Road 1	0	0	0.004395277	0	0	0.913725495	27.9737	977.2227	655.7363	3.8698	0.6318	5	0.3	0.000693	0.044797634	0.000103483
0.1659495	×ÔÉí³µÁ¾	Road 1	0	0	0.004395277	0	0	0.913725495	27.9737	977.2227	655.7363	3.8698	0.6318	6	0.3	0.000693	0.04978485	0.000115003
0.182592982	×ÔÉí³µÁ¾	Road 1	0	0	0.004395277	0	0	0.913725495	27.9737	977.2227	655.7363	3.8698	0.6318	7	0.3	0.000693	0.054777894	0.000126537
0.199615849	×ÔÉí³µÁ¾	Road 1	0	0	0.004395277	0	0	0.913725495	27.9737	977.2227	655.7363	3.8698	0.6318	8	0.3	0.000693	0.059884755	0.000138334
0.215908903	×ÔÉí³µÁ¾	Road 1	0	0	0.004395277	0	0	0.913725495	27.9737	977.2227	655.7363	3.8698	0.6318	9	0.3	0.000693	0.064772671	0.000149625
0.232621665	×ÔÉí³µÁ¾	Road 1	0	0	0.004395277	0	0	0.913725495	27.9737	977.2227	655.7363	3.8698	0.6318	10	0.3	0.000693	0.069786499	0.000161207
0.249281642	×ÔÉí³µÁ¾	Road 1	0	0	0.004395277	0	0	0.905882359	27.9737	977.2227	655.7363	3.8698	0.6318	11	0.3	0.000693	0.074784492	0.000172752
0.265949316	×ÔÉí³µÁ¾	Road 1	0	0	0.004395277	0	0	0.905882359	27.9737	977.2227	655.7363	3.8698	0.6318	12	0.3	0.000693	0.079784795	0.000184303
0.282612959	×ÔÉí³µÁ¾	Road 1	0	0	0.004395277	0	0	0.905882359	27.9737	977.2227	655.7363	3.8698	0.6318	13	0.3	0.000693	0.084783888	0.000195851
0.299293096	×ÔÉí³µÁ¾	Road 1	0	0	0.004395277	0	0	0.905882359	27.9737	977.2227	655.7363	3.8698	0.6318	14	0.3	0.000693	0.089787929	0.00020741
0.315962237	×ÔÉí³µÁ¾	Road 1	0	0	0.004395277	0	0	0.905882359	27.9737	977.2227	655.7363	3.8698	0.6318	15	0.3	0.000693	0.094788671	0.000218962
0.332577495	×ÔÉí³µÁ¾	Road 1	0	0	0.004395277	0	0	0.905882359	27.9737	977.2227	655.7363	3.8698	0.6318	16	0.3	0.000693	0.099773248	0.000230476
0.349293188	×ÔÉí³µÁ¾	Road 1	0	0	0.004395277	0	0	0.905882359	27.9737	977.2227	655.7363	3.8698	0.6318	17	0.3	0.000693	0.104787956	0.00024206
0.365912111	×ÔÉí³µÁ¾	Road 1	0	0	0.004395277	0	0	0.905882359	27.9737	977.2227	655.7363	3.8698	0.6318	18	0.3	0.000693	0.109773633	0.000253577
0.382572088	×ÔÉí³µÁ¾	Road 1	0	0	0.004395277	0	0	0.905882359	27.9737	977.2227	655.7363	3.8698	0.6318	19	0.3	0.000693	0.114771626	0.000265122
0.399273486	×ÔÉí³µÁ¾	Road 1	0	0	0.004395277	0	0	0.905882359	27.9737	977.2227	655.7363	3.8698	0.6318	20	0.3	0.000693	0.119782046	0.000276697
0.416037198	×ÔÉí³µÁ¾	Road 1	0	0	0.004395277	0	0	0.905882359	27.9737	977.2227	655.7363	3.8698	0.6318	21	0.3	0.000693	0.124811159	0.000288314
0.432635594	×ÔÉí³µÁ¾	Road 1	0	0	0.004395277	0	0	0.905882359	27.9737	977.2227	655.7363	3.8698	0.6318	22	0.3	0.000693	0.129790678	0.000299816
0.449302169	×ÔÉí³µÁ¾	Road 1	0	0	0.004395277	0	0	0.905882359	27.9737	977.2227	655.7363	3.8698	0.6318	23	0.3	0.000693	0.134790651	0.000311366
0.465976808	×ÔÉí³µÁ¾	Road 1	0	0	0.004395277	0	0	0.905882359	27.9737	977.2227	655.7363	3.8698	0.6318	24	0.3	0.000693	0.139793042	0.000322922
0.482645216	×ÔÉí³µÁ¾	Road 1	0	0	0.004395277	0	0	0.905882359	27.9737	977.2227	655.7363	3.8698	0.6318	25	0.3	0.000693	0.144793565	0.000334473
0.499285399	×ÔÉí³µÁ¾	Road 1	0	0	0.004395277	0	0	0.905882359	27.9737	977.2227	655.7363	3.8698	0.6318	26	0.3	0.000693	0.14978562	0.000346005
0.51596297	×ÔÉí³µÁ¾	Road 1	0	0	0.004395277	0	0	0.905882359	27.9737	977.2227	655.7363	3.8698	0.6318	27	0.3	0.000693	0.154788891	0.000357562
0.532554035	×ÔÉí³µÁ¾	Road 1	0	0	0.004395277	0	0	0.890196085	27.9737	977.2227	655.7363	3.8698	0.6318	28	0.3	0.000693	0.15976621	0.00036906
0.54929832	×ÔÉí³µÁ¾	Road 1	0	0	0.004395277	0	0	0.898039222	27.9737	977.2227	655.7363	3.8698	0.6318	29	0.3	0.000693	0.164789496	0.000380664
0.566029775	×ÔÉí³µÁ¾	Road 1	0	0	0.004395277	0	0	0.890196085	27.9737	977.2227	655.7363	3.8698	0.6318	30	0.3	0.000693	0.169808933	0.000392259
0.582609477	×ÔÉí³µÁ¾	Road 1	0	0	0.004395277	0	0	0.890196085	27.9737	977.2227	655.7363	3.8698	0.6318	31	0.3	0.000693	0.174782843	0.000403748
0.599240862	×ÔÉí³µÁ¾	Road 1	0	0	0.004395277	0	0	0.890196085	27.9737	977.2227	655.7363	3.8698	0.6318	32	0.3	0.000693	0.179772259	0.000415274
0.615910003	×ÔÉí³µÁ¾	Road 1	0	0	0.004395277	0	0	0.882352948	27.9737	977.2227	655.7363	3.8698	0.6318	33	0.3	0.000693	0.184773001	0.000426826
0.632618366	×ÔÉí³µÁ¾	Road 1	0	0	0.004395277	0	0	0.882352948	27.9737	977.2227	655.7363	3.8698	0.6318	34	0.3	0.000693	0.18978551	0.000438405
0.64968412	×ÔÉí³µÁ¾	Road 1	0	0	0.004395277	0	0	0.882352948	27.9737	977.2227	655.7363	3.8698	0.6318	35	0.3	0.000693	0.194905236	0.000450231
0.665980474	×ÔÉí³µÁ¾	Road 1	0	0	0.004395277	0	0	0.882352948	27.9737	977.2227	655.7363	3.8698	0.6318	36	0.3	0.000693	0.199794142	0.000461524
0.682592432	×ÔÉí³µÁ¾	Road 1	0	0	0.004395277	0	0	0.882352948	27.9737	977.2227	655.7363	3.8698	0.6318	37	0.3	0.000693	0.20477773	0.000473037
0.69929383	×ÔÉí³µÁ¾	Road 1	0	0	0.004395277	0	0	0.882352948	27.9737	977.2227	655.7363	3.8698	0.6318	38	0.3	0.000693	0.209788149	0.000484611
0.716015388	×ÔÉí³µÁ¾	Road 1	0	0	0.004395277	0	0	0.882352948	27.9737	977.2227	655.7363	3.8698	0.6318	39	0.3	0.000693	0.214804616	0.000496199
0.732579327	×ÔÉí³µÁ¾	Road 1	0	0	0.004395277	0	0	0.882352948	27.9737	977.2227	655.7363	3.8698	0.6318	40	0.3	0.000693	0.219773798	0.000507677
0.749295021	×ÔÉí³µÁ¾	Road 1	0	0	0.004395277	0	0	0.882352948	27.9737	977.2227	655.7363	3.8698	0.6318	41	0.3	0.000693	0.224788506	0.000519261
0.765966728	×ÔÉí³µÁ¾	Road 1	0	0	0.004395277	0	0	0.882352948	27.9737	977.2227	655.7363	3.8698	0.6318	42	0.3	0.000693	0.229790018	0.000530815
0.782594081	×ÔÉí³µÁ¾	Road 1	0	0	0.004395277	0	0	0.882352948	27.9737	977.2227	655.7363	3.8698	0.6318	43	0.3	0.000693	0.234778224	0.000542338
0.79929218	×ÔÉí³µÁ¾	Road 1	0	0	0.004395277	0	0	0.882352948	27.9737	977.2227	655.7363	3.8698	0.6318	44	0.3	0.000693	0.239787654	0.000553909
0.815938961	×ÔÉí³µÁ¾	Road 1	0	0	0.004395277	0	0	0.882352948	27.9737	977.2227	655.7363	3.8698	0.6318	45	0.3	0.000693	0.244781688	0.000565446
0.832637793	×ÔÉí³µÁ¾	Road 1	0	0	0.004395277	0	0	0.882352948	27.9737	977.2227	655.7363	3.8698	0.6318	46	0.3	0.000693	0.249791338	0.000577018
0.849229591	×ÔÉí³µÁ¾	Road 1	0	0	0.004395277	0	0	0.882352948	27.9737	977.2227	655.7363	3.8698	0.6318	47	0.3	0.000693	0.254768877	0.000588516
0.865915593	×ÔÉí³µÁ¾	Road 1	0	0	0.004395277	0	0	0.882352948	27.9737	977.2227	655.7363	3.8698	0.6318	48	0.3	0.000693	0.259774678	0.00060008
0.882615525	×ÔÉí³µÁ¾	Road 1	0	0	0.004395277	0	0	0.882352948	27.9737	977.2227	655.7363	3.8698	0.6318	49	0.3	0.000693	0.264784657	0.000611653
0.899267804	×ÔÉí³µÁ¾	Road 1	0	0	0.004395277	0	0	0.882352948	27.9737	977.2227	655.7363	3.8698	0.6318	50	0.3	0.000693	0.269780341	0.000623193
0.915947209	×ÔÉí³µÁ¾	Road 1	0	0	0.004395277	0	0	0.882352948	27.9737	977.2227	655.7363	3.8698	0.6318	51	0.3	0.000693	0.274784163	0.000634751
0.932583726	×ÔÉí³µÁ¾	Road 1	0	0	0.004395277	0	0	0.882352948	27.9737	977.2227	655.7363	3.8698	0.6318	52	0.3	0.000693	0.279775118	0.000646281
0.950156061	×ÔÉí³µÁ¾	Road 1	0	0	0.004395277	0	0	0.882352948	27.9737	977.2227	655.7363	3.8698	0.6318	53	0.3	0.000693	0.285046818	0.000658458
0.965901847	×ÔÉí³µÁ¾	Road 1	0	0	0.004395277	0	0	0.882352948	27.9737	977.2227	655.7363	3.8698	0.6318	54	0.3	0.000693	0.289770554	0.00066937
0.982633669	×ÔÉí³µÁ¾	Road 1	0	0	0.004395277	0	0	0.874509811	27.9737	977.2227	655.7363	3.8698	0.6318	55	0.3	0.000693	0.294790101	0.000680965
0.999687694	×ÔÉí³µÁ¾	Road 1	0	0	0.004395277	0	0	0.874509811	27.9737	977.2227	655.7363	3.8698	0.6318	56	0.3	0.000693	0.299906308	0.000692784
1.015936395	×ÔÉí³µÁ¾	Road 1	0	0	0.004395277	0	0	0.874509811	27.9737	977.2227	655.7363	3.8698	0.6318	57	0.3	0.000693	0.304780919	0.000704044
1.032538456	×ÔÉí³µÁ¾	Road 1	0	0	0.004395277	0	0	0.874509811	27.9737	977.2227	655.7363	3.8698	0.6318	58	0.3	0.000693	0.309761537	0.000715549
1.049199166	×ÔÉí³µÁ¾	Road 1	0	0	0.004395277	0	0	0.866666675	27.9737	977.2227	655.7363	3.8698	0.6318	59	0.3	0.000693	0.31475975	0.000727095
1.065947117	×ÔÉí³µÁ¾	Road 1	0	0	0.004395277	0	0	0.866666675	27.9737	977.2227	655.7363	3.8698	0.6318	60	0.3	0.000693	0.319784135	0.000738701
1.082600496	×ÔÉí³µÁ¾	Road 1	0	0	0.004395277	0	0	0.866666675	27.9737	977.2227	655.7363	3.8698	0.6318	61	0.3	0.000693	0.324780149	0.000750242
1.099226017	×ÔÉí³µÁ¾	Road 1	0	0	0.004395277	0	0	0.866666675	27.9737	977.2227	655.7363	3.8698	0.6318	62	0.3	0.000693	0.329767805	0.000761764
1.115864733	×ÔÉí³µÁ¾	Road 1	0	0	0.004395277	0	0	0.850980401	27.9737	977.2227	655.7363	3.8698	0.6318	63	0.3	0.000693	0.33475942	0.000773294
1.132663635	×ÔÉí³µÁ¾	Road 1	0	0	0.004395277	0	0	0.835294127	27.9737	977.2227	655.7363	3.8698	0.6318	64	0.3	0.000693	0.339799091	0.000784936
1.149258732	×ÔÉí³µÁ¾	Road 1	0	0	0.004395277	0	0	0.811764717	27.9737	977.2227	655.7363	3.8698	0.6318	65	0.3	0.000693	0.34477762	0.000796436
1.165962696	×ÔÉí³µÁ¾	Road 1	0	0	0.004395277	0	0	0.772549033	27.9737	977.2227	655.7363	3.8698	0.6318	66	0.3	0.000693	0.349788809	0.000808012
1.182583451	×ÔÉí³µÁ¾	Road 1	0	0	0.004395277	0	0	0.725490212	27.9737	977.2227	655.7363	3.8698	0.6318	67	0.3	0.000693	0.354775035	0.00081953
1.199247094	×ÔÉí³µÁ¾	Road 1	0	0	0.004395277	0	0	0.694117665	27.9737	977.2227	655.7363	3.8698	0.6318	68	0.3	0.000693	0.359774128	0.000831078
1.215894974	×ÔÉí³µÁ¾	Road 1	0	0	0.004395277	0	0	0.623529434	27.9737	977.2227	655.7363	3.8698	0.6318	69	0.3	0.000693	0.364768492	0.000842615
1.232564848	×ÔÉí³µÁ¾	Road 1	0	0	0.004395277	0	0	0.545098066	27.9737	977.2227	655.7363	3.8698	0.6318	70	0.3	0.000693	0.369769455	0.000854167
1.249814248	×ÔÉí³µÁ¾	Road 1	2.60E-05	0.005432551	0.004395277	0.342808753	0	0.490196079	27.9737	977.2227	655.7363	3.8698	0.6318	71	0.300049646	0.000693115	0.374945131	0.000866123
1.265933554	×ÔÉí³µÁ¾	Road 1	0.000133593	0.024022509	0.004395277	0.48149246	0	0.435294122	27.9737	977.2227	655.7363	3.8698	0.6318	72	0.300333624	0.000693771	0.3797863	0.000877306
1.282600863	×ÔÉí³µÁ¾	Road 1	0.000354803	0.047779628	0.004395277	0.581035078	0	0.372549027	27.9739	977.2227	655.7363	3.8698	0.6318	73	0.30081385	0.00069488	0.384800058	0.000888888
1.299243245	×ÔÉí³µÁ¾	Road 1	0.000713854	0.077668016	0.004395277	0.646456838	0	0.34117648	27.9742	977.2227	655.7363	3.8698	0.6318	74	0.301577577	0.000696644	0.389819027	0.000900482
1.315998893	×ÔÉí³µÁ¾	Road 1	0.001286396	0.123012435	0.004395277	0.679177642	0	0.31764707	27.9748	977.2227	655.7363	3.8698	0.6318	75	0.303303426	0.000700631	0.394901072	0.000912221
1.332597289	×ÔÉí³µÁ¾	Road 1	0.001991345	0.152895275	0.004395277	0.692867875	0	0.309803933	27.9753	977.2227	655.7363	3.8698	0.6318	76	0.303335546	0.000700705	0.399935956	0.000923852
1.349227941	×ÔÉí³µÁ¾	Road 1	0.002835851	0.182808343	0.004395277	0.690017939	0	0.294117659	27.976	977.2227	655.7363	3.8698	0.6318	77	0.304030943	0.000702311	0.404992189	0.000935532
1.365912844	×ÔÉí³µÁ¾	Road 1	0.003897787	0.229127383	0.004395277	0.676107466	0	0.270588249	27.9773	977.2227	655.7363	3.8699	0.6318	78	0.306723483	0.000708531	0.41010984	0.000947354
1.382628537	×ÔÉí³µÁ¾	Road 1	0.005095229	0.257888845	0.004395277	0.662971914	0	0.254901975	27.9782	977.2227	655.7363	3.8699	0.6318	79	0.305626673	0.000705998	0.415218602	0.000959155
1.399277884	×ÔÉí³µÁ¾	Road 1	0.006417586	0.285926217	0.004395277	0.646951079	0	0.247058824	27.9793	977.2227	655.7363	3.8699	0.6317	80	0.306180946	0.000707278	0.420316315	0.000970931
1.415926498	×ÔÉí³µÁ¾	Road 1	0.007883024	0.31687797	0.004395277	0.627230704	0	0.239215687	27.9805	977.2227	655.7363	3.8699	0.6317	81	0.307307071	0.000709879	0.425432552	0.000982749
1.432664552	×ÔÉí³µÁ¾	Road 1	0.009527789	0.353753972	0.004395277	0.595169127	0	0.239215687	27.9825	977.2227	655.7363	3.87	0.6317	82	0.309135615	0.000714103	0.43060688	0.000994702
1.449289339	×ÔÉí³µÁ¾	Road 1	0.011283034	0.380088061	0.004395277	0.577078521	0	0.223529413	27.984	977.2227	655.7363	3.87	0.6317	83	0.307979063	0.000711432	0.435726967	0.001006529
1.465879304	×ÔÉí³µÁ¾	Road 1	0.01320445	0.416944563	0.004395277	0.551588058	0	0.20784314	27.9865	977.2227	655.7363	3.87	0.6316	84	0.310894071	0.000718165	0.440884688	0.001018444
1.482556876	×ÔÉí³µÁ¾	Road 1	0.015240304	0.439457014	0.004395277	0.539657652	0	0.192156866	27.9881	977.2227	655.7363	3.8701	0.6316	85	0.308413171	0.000712434	0.446028271	0.001030325
1.499316923	×ÔÉí³µÁ¾	Road 1	0.017388681	0.461463869	0.004395277	0.530562162	0	0.176470593	27.9899	977.2227	655.7363	3.8701	0.6315	86	0.308700711	0.000713099	0.451202109	0.001042277
1.515915685	×ÔÉí³µÁ¾	Road 1	0.019615561	0.48297379	0.004395277	0.524406254	0	0.160784319	27.9917	977.2227	655.7363	3.8701	0.6315	87	0.309044804	0.000713893	0.456331871	0.001054127
1.532540472	×ÔÉí³µÁ¾	Road 1	0.022021491	0.520990026	0.004395277	0.520246208	0	0.137254909	27.9952	977.2227	655.7363	3.8702	0.6315	88	0.3139722	0.000725276	0.461551592	0.001066184
1.54926533	×ÔÉí³µÁ¾	Road 1	0.02454122	0.542367822	0.004395277	0.52278626	0	0.121568628	27.9973	977.2227	655.7363	3.8702	0.6314	89	0.310091457	0.000716311	0.466737827	0.001078164
1.565927873	×ÔÉí³µÁ¾	Road 1	0.027162327	0.566299349	0.004395277	0.545757473	0	0.098039217	27.9996	977.2227	655.7363	3.8703	0.6314	90	0.311284945	0.000719068	0.471924626	0.001090146
1.584791585	×ÔÉí³µÁ¾	Road 1	0.030305323	0.599817413	0.004395277	0.573703527	0	0.074509807	28.0028	977.2227	655.7363	3.8703	0.6313	91	0.313618416	0.000724459	0.477840634	0.001103812
1.599185512	×ÔÉí³µÁ¾	Road 1	0.032803123	0.624713677	0.004395277	0.610774815	0	0.050980393	28.0052	977.2227	655.7363	3.8704	0.6313	92	0.31401071	0.000725365	0.482360481	0.001114253
1.615864917	×ÔÉí³µÁ¾	Road 1	0.035823864	0.651981604	0.004395277	0.66629678	0	0.027450981	28.0077	977.2227	655.7363	3.8704	0.6312	93	0.314089625	0.000725547	0.487599309	0.001126354
1.632731631	×ÔÉí³µÁ¾	Road 1	0.039025793	0.683413714	0.004395277	0.705368042	0	0.011764706	28.0105	977.2227	655.7363	3.8705	0.6312	94	0.316068595	0.000730118	0.492930348	0.001138669
1.64922006	×ÔÉí³µÁ¾	Road 1	0.042329355	0.721283019	0.004395277	0.717948437	0	0.011764706	28.0138	977.2227	655.7363	3.8705	0.6311	95	0.319550328	0.000738161	0.49819923	0.00115084
1.665895799	×ÔÉí³µÁ¾	Road 1	0.04583448	0.756695151	0.004395277	0.708903253	0	0.011764706	28.0171	977.2227	655.7363	3.8706	0.6311	96	0.319447229	0.000737923	0.503526249	0.001163146
1.682608194	×ÔÉí³µÁ¾	Road 1	0.049589668	0.808901346	0.004395277	0.697837651	0	0.011764706	28.0223	977.2227	655.7363	3.8707	0.631	97	0.327423728	0.000756349	0.508998283	0.001175786
1.699192294	×ÔÉí³µÁ¾	Road 1	0.053454533	0.838966978	0.004395277	0.692477405	0	0.011764706	28.0255	977.2227	655.7363	3.8707	0.6309	98	0.319434042	0.000737893	0.51429581	0.001188023
1.715834676	×ÔÉí³µÁ¾	Road 1	0.057470821	0.868784183	0.004395277	0.687547266	0	0.011764706	28.0289	977.2227	655.7363	3.8708	0.6308	99	0.319978051	0.000739149	0.519621007	0.001200325
1.732541572	×ÔÉí³µÁ¾	Road 1	0.061649694	0.900462949	0.004395277	0.682632148	0	0.011764706	28.0326	977.2227	655.7363	3.8709	0.6308	100	0.321499461	0.000742664	0.524992265	0.001212732
1.749267163	×ÔÉí³µÁ¾	Road 1	0.065998548	0.936043096	0.004395277	0.677102029	0	0.011764706	28.0369	977.2227	655.7363	3.8709	0.6307	101	0.324161471	0.000748813	0.530414057	0.001225256
1.765899648	×ÔÉí³µÁ¾	Road 1	0.070476353	0.969193697	0.004395277	0.670921743	0	0.011764706	28.0411	977.2227	655.7363	3.871	0.6306	102	0.323946574	0.000748317	0.535802093	0.001237703
1.782529201	×ÔÉí³µÁ¾	Road 1	0.075114414	1.00405705	0.004395277	0.664725959	0	0.011764706	28.0458	977.2227	655.7363	3.8711	0.6305	103	0.325684655	0.000752332	0.541218084	0.001250214
1.799228033	×ÔÉí³µÁ¾	Road 1	0.079931769	1.03854425	0.004395277	0.65856117	0	0.011764706	28.0506	977.2227	655.7363	3.8712	0.6304	104	0.326305543	0.000753766	0.546667005	0.001262801
1.815890209	×ÔÉí³µÁ¾	Road 1	0.08488715	1.070650828	0.004395277	0.652370989	0	0.011764706	28.0553	977.2227	655.7363	3.8713	0.6304	105	0.325888803	0.000752803	0.552097022	0.001275344
1.832546521	×ÔÉí³µÁ¾	Road 1	0.08999687	1.104385614	0.004395277	0.646235466	0	0.011764706	28.0605	977.2227	655.7363	3.8714	0.6303	106	0.327624482	0.000756813	0.557554037	0.00128795
1.849229957	×ÔÉí³µÁ¾	Road 1	0.095278793	1.139748609	0.004395277	0.642955363	0	0.011764706	28.0661	977.2227	655.7363	3.8715	0.6302	107	0.329418665	0.000760957	0.563049873	0.001300645
1.865901297	×ÔÉí³µÁ¾	Road 1	0.10069314	1.169171154	0.004395277	0.642940462	0	0.011764706	28.0709	977.2227	655.7363	3.8716	0.6301	108	0.326701211	0.00075468	0.56849642	0.001313227
1.882589866	×ÔÉí³µÁ¾	Road 1	0.106267589	1.20250082	0.004395277	0.642700493	0	0.011764706	28.0765	977.2236	655.7363	3.8707	0.631	109	0.329819564	0.000761883	0.574000636	0.001325941
1.899219419	×ÔÉí³µÁ¾	Road 1	0.111976117	1.235793793	0.004395277	0.641875088	0	0.011764706	28.0823	977.2236	655.7363	3.8708	0.6308	110	0.330704868	0.000763928	0.57950011	0.001338645
1.915840907	×ÔÉí³µÁ¾	Road 1	0.117826327	1.267080045	0.004395277	0.641045153	0	0.011764706	28.0878	977.2236	655.7363	3.8709	0.6307	111	0.330211684	0.000762789	0.58498872	0.001351324
1.932520678	×ÔÉí³µÁ¾	Road 1	0.123914124	1.313931048	0.004395277	0.64002496	0	0.011764706	28.0964	977.2236	655.7363	3.871	0.6306	112	0.34154523	0.000788969	0.590685616	0.001364484
1.949246635	×ÔÉí³µÁ¾	Road 1	0.130145548	1.341216302	0.004395277	0.639194906	0	0.011764706	28.1016	977.2236	655.7363	3.8711	0.6305	113	0.329147494	0.000760331	0.596190923	0.001377201
1.965856028	×ÔÉí³µÁ¾	Road 1	0.13645928	1.368468833	0.004395277	0.638784826	0	0.011764706	28.1069	977.2236	655.7363	3.8712	0.6304	114	0.329854867	0.000761965	0.601669612	0.001389857
1.98257612	×ÔÉí³µÁ¾	Road 1	0.142950511	1.397625732	0.004395277	0.637954831	0	0.011764706	28.1126	977.2236	655.7363	3.8713	0.6303	115	0.331713062	0.000766257	0.607215885	0.001402669
1.999241962	×ÔÉí³µÁ¾	Road 1	0.149573446	1.430624843	0.004395277	0.637124598	0	0.011764706	28.1193	977.2236	655.7363	3.8715	0.6302	116	0.335324882	0.0007746	0.612804356	0.001415578
2.01587518	×ÔÉí³µÁ¾	Road 1	0.15632669	1.461633968	0.004395277	0.636294544	0	0.011764706	28.1257	977.2236	655.7363	3.8716	0.6301	117	0.334667056	0.000773081	0.618370946	0.001428437
2.032586475	×ÔÉí³µÁ¾	Road 1	0.163264358	1.494534373	0.004395277	0.635464489	0	0.011764706	28.1327	977.2236	655.7363	3.8717	0.6299	118	0.336772149	0.000777944	0.623998845	0.001441437
2.049185237	×ÔÉí³µÁ¾	Road 1	0.170306763	1.527382421	0.004395277	0.634634376	0	0.011764706	28.1399	977.2236	655.7363	3.8718	0.6298	119	0.337720051	0.000780133	0.62960458	0.001454387
2.065625281	×ÔÉí³µÁ¾	Road 1	0.177431608	1.56018101	0.004395277	0.633804321	0	0.011764706	28.1472	977.2236	655.7363	3.872	0.6297	120	0.338751251	0.000782515	0.635173665	0.001467251
2.082526452	×ÔÉí³µÁ¾	Road 1	0.184900995	1.591001844	0.004395277	0.63297379	0	0.011764706	28.1542	977.2236	655.7363	3.8721	0.6295	121	0.337204888	0.000778943	0.640872823	0.001480416
2.099227116	×ÔÉí³µÁ¾	Road 1	0.192433452	1.623698509	0.004395277	0.63213414	0	0.011764706	28.1618	977.2236	655.7363	3.8722	0.6294	122	0.339824026	0.000784994	0.64654811	0.001493526
2.115842374	×ÔÉí³µÁ¾	Road 1	0.200069207	1.654426324	0.004395277	0.631304085	0	0.011764706	28.1691	977.2236	655.7363	3.8724	0.6293	123	0.339063649	0.000783237	0.65218174	0.00150654
2.132551836	×ÔÉí³µÁ¾	Road 1	0.207899559	1.687024176	0.004395277	0.630473554	0	0.011764706	28.177	977.2236	655.7363	3.8725	0.6291	124	0.341288557	0.000788377	0.657884488	0.001519713
2.149216211	×ÔÉí³µÁ¾	Road 1	0.215868259	1.721475863	0.004395277	0.629413784	0	0.011764706	28.1855	977.2236	655.7363	3.8727	0.629	125	0.343837888	0.000794266	0.663614331	0.001532949
2.165839166	×ÔÉí³µÁ¾	Road 1	0.223949536	1.750145888	0.004395277	0.628583789	0	0.011764706	28.1927	977.2236	655.7363	3.8728	0.6288	126	0.33948456	0.000784209	0.669257568	0.001545985
2.182503542	×ÔÉí³µÁ¾	Road 1	0.232201132	1.782589781	0.004395277	0.627978504	0	0.011764706	28.2011	977.2236	655.7363	3.873	0.6287	127	0.343583853	0.000793679	0.674983178	0.001559211
2.199243062	×ÔÉí³µÁ¾	Road 1	0.240640542	1.814978957	0.004395277	0.626913488	0	0.011764706	28.2096	977.2246	655.7363	3.8721	0.6295	128	0.344194508	0.000795089	0.680744829	0.001572521
2.215868216	×ÔÉí³µÁ¾	Road 1	0.249162903	1.845426536	0.004395277	0.626312971	0	0.011764706	28.2177	977.2246	655.7363	3.8723	0.6294	129	0.343320036	0.000793069	0.686452578	0.001585705
2.232521595	×ÔÉí³µÁ¾	Road 1	0.25784917	1.877730632	0.004395277	0.625488222	0	0.011764706	28.2265	977.2246	655.7363	3.8724	0.6292	130	0.345811399	0.000798824	0.692211506	0.001599009
2.249217861	×ÔÉí³µÁ¾	Road 1	0.266716177	1.911878157	0.004395277	0.62465322	0	0.011764706	28.236	977.2246	655.7363	3.8726	0.629	131	0.348360328	0.000804712	0.698027823	0.001612444
2.265895799	×ÔÉí³µÁ¾	Road 1	0.275705072	1.940288973	0.004395277	0.623573184	0	0.011764706	28.244	977.2246	655.7363	3.8728	0.6289	132	0.343446126	0.000793361	0.703755796	0.001625676
2.282512889	×ÔÉí³µÁ¾	Road 1	0.28480957	1.972438788	0.004395277	0.622973025	0	0.011764706	28.2532	977.2246	655.7363	3.8729	0.6287	133	0.348051614	0.000803999	0.709539401	0.001639036
2.299185696	×ÔÉí³µÁ¾	Road 1	0.294093225	2.004531097	0.004395277	0.62192291	0	0.011764706	28.2626	977.2246	655.7363	3.8731	0.6285	134	0.348667909	0.000805423	0.715352674	0.001652465
2.315828811	×ÔÉí³µÁ¾	Road 1	0.303499812	2.034698009	0.004395277	0.621502936	0	0.011764706	28.2716	977.2246	655.7363	3.8723	0.6284	135	0.347461151	0.000802635	0.72113551	0.001665823
2.332485489	×ÔÉí³µÁ¾	Road 1	0.313070828	2.068579245	0.004395277	0.621322811	0	0.011764706	28.2813	977.2246	655.7363	3.8725	0.6282	136	0.35215385	0.000813475	0.727001223	0.001679373
2.349207414	×ÔÉí³µÁ¾	Road 1	0.322792823	2.093011379	0.004395277	0.620252669	0	0.011764706	28.2894	977.2246	655.7363	3.8726	0.6281	137	0.342552453	0.000791296	0.732729359	0.001692605
2.365892683	×ÔÉí³µÁ¾	Road 1	0.332676152	2.132419038	0.004395277	0.618987679	0	0.011764706	28.3017	977.2246	655.7363	3.8728	0.6278	138	0.359707729	0.000830925	0.73873118	0.001706469
2.382504642	×ÔÉí³µÁ¾	Road 1	0.342645717	2.160517859	0.004395277	0.618592441	0	0.011764706	28.3107	977.2246	655.7363	3.873	0.6277	139	0.34818055	0.000804297	0.74451514	0.00171983
2.399235364	×ÔÉí³µÁ¾	Road 1	0.35287784	2.201676893	0.004395277	0.618222415	0	0.011764706	28.3191	977.2246	655.7362	3.8731	0.6275	140	0.363494309	0.000839672	0.750596663	0.001733878
2.415894241	×ÔÉí³µÁ¾	Road 1	0.363187056	2.227831864	0.004395277	0.617387354	0	0.011764706	28.3326	977.2246	655.7362	3.8734	0.6273	141	0.347377763	0.000802443	0.756383586	0.001747246
2.432552752	×ÔÉí³µÁ¾	Road 1	0.373616859	2.253940272	0.004395277	0.616092145	0	0.011764706	28.3413	977.2256	655.7363	3.8726	0.6281	142	0.347881927	0.000803607	0.762178781	0.001760633
2.449188536	×ÔÉí³µÁ¾	Road 1	0.384178715	2.285596132	0.004395277	0.615257144	0	0.011764706	28.3521	977.2256	655.7363	3.8728	0.6279	143	0.355102336	0.000820286	0.768086187	0.001774279
2.465823954	×ÔÉí³µÁ¾	Road 1	0.394877794	2.315342045	0.004395277	0.614421904	0	0.011764706	28.3623	977.2256	655.7362	3.873	0.6277	144	0.353556857	0.000816716	0.773967753	0.001787866
2.482556509	×ÔÉí³µÁ¾	Road 1	0.405786098	2.346915722	0.004395277	0.613821805	0	0.011764706	28.3733	977.2256	655.7362	3.8732	0.6275	145	0.356267669	0.000822978	0.779929021	0.001801636
2.499212454	×ÔÉí³µÁ¾	Road 1	0.416790309	2.378439617	0.004395277	0.612986803	0	0.011764706	28.3845	977.2256	655.7362	3.8734	0.6273	146	0.357143511	0.000825002	0.785877584	0.001815377
2.515866933	×ÔÉí³µÁ¾	Road 1	0.427930606	2.408065152	0.004395277	0.612151623	0	0.011764706	28.3951	977.2256	655.7362	3.8735	0.6271	147	0.35551998	0.000821251	0.791798584	0.001829055
2.532488421	×ÔÉí³µÁ¾	Road 1	0.439193948	2.439494419	0.004395277	0.611321509	0	0.011764706	28.4066	977.2256	655.7362	3.8738	0.6269	148	0.358580715	0.000828321	0.797758729	0.001842823
2.549255433	×ÔÉí³µÁ¾	Road 1	0.450710649	2.472720122	0.004395277	0.610481381	0	0.011764706	28.4188	977.2256	655.7362	3.874	0.6267	149	0.361293198	0.000834587	0.803816536	0.001856816
2.565819739	×ÔÉí³µÁ¾	Road 1	0.462274605	2.513249803	0.004395277	0.609651268	0	0.011764706	28.4341	977.2256	655.7362	3.8743	0.6264	150	0.372262305	0.000859926	0.809982803	0.00187106
2.582515272	×ÔÉí³µÁ¾	Road 1	0.474049592	2.538999867	0.004395277	0.60923624	0	0.011764706	28.4439	977.2256	655.7362	3.8744	0.6262	151	0.35341799	0.000816396	0.815883305	0.00188469
2.599217036	×ÔÉí³µÁ¾	Road 1	0.485948403	2.564741993	0.004395277	0.608811021	0	0.011764706	28.4538	977.2256	655.7362	3.8746	0.6261	152	0.353938198	0.000817597	0.821794697	0.001898346
2.615900839	×ÔÉí³µÁ¾	Road 1	0.498021541	2.605119324	0.004395277	0.607560992	0	0.011764706	28.4696	977.2266	655.7362	3.8739	0.6267	153	0.374325578	0.000864692	0.828039871	0.001912772
2.632580977	×ÔÉí³µÁ¾	Road 1	0.510153022	2.618283606	0.004395277	0.6411919	0	0	28.4747	977.2266	655.7362	3.874	0.6267	154	0.338177306	0.00078119	0.833680715	0.001925802
2.649218594	×ÔÉí³µÁ¾	Road 1	0.522462762	2.663546419	0.004395277	0.713714182	0	0	28.4901	977.2266	655.7362	3.8743	0.6264	155	0.38280593	0.000884282	0.840049694	0.001940515
2.66587014	×ÔÉí³µÁ¾	Road 1	0.535016248	2.714015293	0.004395277	0.702203572	0	0	28.5073	977.2266	655.7362	3.8746	0.6261	156	0.39153573	0.000904448	0.846569369	0.001955575
2.682585101	×ÔÉí³µÁ¾	Road 1	0.547758254	2.744321251	0.004395277	0.698073387	0	0	28.5179	977.2266	655.7362	3.8748	0.6259	157	0.364107507	0.000841088	0.852655412	0.001969634
2.69916077	×ÔÉí³µÁ¾	Road 1	0.560532893	2.774470139	0.004395277	0.69602257	0	0	28.5287	977.2266	655.7362	3.875	0.6257	158	0.364952988	0.000843041	0.858704752	0.001983608
2.715837975	×ÔÉí³µÁ¾	Road 1	0.57359474	2.819576097	0.004395277	0.694353044	0	0	28.545	977.2266	655.7362	3.8753	0.6254	159	0.387306243	0.000894677	0.865163937	0.001998529
2.732531675	×ÔÉí³µÁ¾	Road 1	0.586808694	2.849591947	0.004395277	0.69352299	0	0	28.556	977.2266	655.7362	3.8755	0.6252	160	0.366208876	0.000845943	0.871277319	0.002012651
2.7491429	×ÔÉí³µÁ¾	Road 1	0.600105533	2.881703353	0.004395277	0.692697942	0	0	28.568	977.2266	655.7362	3.8757	0.625	161	0.37028656	0.000855362	0.877428232	0.002026859
2.765817906	×ÔÉí³µÁ¾	Road 1	0.613592044	2.91162951	0.004395277	0.691867113	0	0	28.5792	977.2266	655.7362	3.8759	0.6248	162	0.367571874	0.000849091	0.883557495	0.002041018
2.782562191	×ÔÉí³µÁ¾	Road 1	0.627303345	2.947912288	0.004395277	0.69060272	0	0	28.5931	977.2266	655.7362	3.8762	0.6245	163	0.37779134	0.000872698	0.889883341	0.002055631
2.799217769	×ÔÉí³µÁ¾	Road 1	0.641109561	2.984127903	0.004395277	0.689376771	0	0	28.6071	977.2275	655.7362	3.8754	0.6252	164	0.378944275	0.000875361	0.896194877	0.00207021
2.815835592	×ÔÉí³µÁ¾	Road 1	0.655041536	3.018151617	0.004395277	0.688312411	0	0	28.6204	977.2275	655.7362	3.8757	0.625	165	0.376576018	0.000869891	0.902452751	0.002084666
2.832538456	×ÔÉí³µÁ¾	Road 1	0.669212257	3.054242563	0.004395277	0.68747741	0	0	28.6348	977.2275	655.7362	3.876	0.6247	166	0.380450943	0.000878842	0.908807371	0.002099345
2.849207231	×ÔÉí³µÁ¾	Road 1	0.683530704	3.092393446	0.004395277	0.686456501	0	0	28.6501	977.2275	655.7362	3.8762	0.6244	167	0.384840451	0.000888981	0.91522219	0.002114163
2.865867208	×ÔÉí³µÁ¾	Road 1	0.697988473	3.124131918	0.004395277	0.685622156	0	0	28.6631	977.2275	655.7362	3.8755	0.6242	168	0.375471977	0.00086734	0.921477544	0.002128613
2.882551377	×ÔÉí³µÁ¾	Road 1	0.712633631	3.160035539	0.004395277	0.684147	0	0	28.6779	977.2275	655.7362	3.8758	0.6239	169	0.383011894	0.000884757	0.92786778	0.002143375
2.899153805	×ÔÉí³µÁ¾	Road 1	0.7274306	3.208512068	0.004395277	0.68313694	0	0	28.6983	977.2275	655.7362	3.8761	0.6236	170	0.405304625	0.000936254	0.93459682	0.002158919
2.915862168	×ÔÉí³µÁ¾	Road 1	0.742458658	3.237959933	0.004395277	0.682311714	0	0	28.7108	977.2275	655.7362	3.8764	0.6233	171	0.374277753	0.000864582	0.940850389	0.002173364
2.932508582	×ÔÉí³µÁ¾	Road 1	0.757566939	3.26735909	0.004395277	0.681246698	0	0	28.7235	977.2275	655.7362	3.8766	0.6231	172	0.375056682	0.000866381	0.947093738	0.002187787
2.949158295	×ÔÉí³µÁ¾	Road 1	0.77283338	3.300908804	0.004387911	0.680416584	0	0	28.7381	977.2275	655.7361	3.8769	0.6228	173	0.382863188	0.000884414	0.9534683	0.002202512
2.965955364	×ÔÉí³µÁ¾	Road 1	0.788391259	3.334413028	0.004368309	0.679391682	0	0	28.7528	977.2285	655.7362	3.8761	0.6236	174	0.383123135	0.000885014	0.959903646	0.002217377
2.982566956	×ÔÉí³µÁ¾	Road 1	0.803941302	3.369945216	0.004324419	0.67855674	0	0	28.7687	977.2285	655.7362	3.8764	0.6233	175	0.388176326	0.000896687	0.966351872	0.002232273
2.999130895	×ÔÉí³µÁ¾	Road 1	0.819609918	3.405410886	0.004254328	0.677491724	0	0	28.7847	977.2285	655.7361	3.8767	0.623	176	0.38917096	0.000898985	0.972798077	0.002247164
3.015829727	×ÔÉí³µÁ¾	Road 1	0.83556076	3.438745379	0.004175494	0.676466703	0	0	28.7999	977.2285	655.7361	3.877	0.6227	177	0.385780953	0.000891154	0.979240168	0.002262045
3.032533325	×ÔÉí³µÁ¾	Road 1	0.851747672	3.488642621	0.004090612	0.675646663	0	0	28.823	977.2285	655.7361	3.8774	0.6223	178	0.416550676	0.000962232	0.986198063	0.002278118
3.04914455	×ÔÉí³µÁ¾	Road 1	0.867912113	3.503172684	0.004018446	0.674821675	0	0	28.8298	977.2285	655.7361	3.8775	0.6222	179	0.353673347	0.000816985	0.99207301	0.002291689
3.065818089	×ÔÉí³µÁ¾	Road 1	0.884338767	3.546694636	0.003933431	0.673561811	0	0	28.8503	977.2285	655.7361	3.8779	0.6218	180	0.407099574	0.0009404	0.998860801	0.002307368
3.082554676	×ÔÉí³µÁ¾	Road 1	0.900971806	3.577726936	0.003845128	0.672726572	0	0	28.8652	977.2285	655.7361	3.8782	0.6215	181	0.384906204	0.000889133	1.005302817	0.00232225
3.099219419	×ÔÉí³µÁ¾	Road 1	0.917695995	3.612841988	0.003751521	0.671901941	0	0	28.8822	977.2285	655.7361	3.8785	0.6212	182	0.393569678	0.000909146	1.011861555	0.0023374
3.115895524	×ÔÉí³µÁ¾	Road 1	0.934651182	3.660247564	0.003648585	0.670237899	0	0	28.9054	977.2295	655.7361	3.8779	0.6218	183	0.417806702	0.000965133	1.018828943	0.002353495
3.149260565	×ÔÉí³µÁ¾	Road 1	0.969108069	3.717807341	0.003560343	0.668572485	0	0	28.9341	977.2295	655.7361	3.8785	0.6212	184	0.38391497	0.000886844	1.031638282	0.002383084
3.165867024	×ÔÉí³µÁ¾	Road 1	0.986466067	3.762920809	0.003522056	0.667322338	0	0	28.957	977.2295	655.7361	3.8789	0.6208	185	0.417079604	0.000963454	1.038564497	0.002399084
3.182546429	×ÔÉí³µÁ¾	Road 1	1.003966698	3.777249384	0.003498794	0.666903079	0	0	28.9643	977.2295	655.7361	3.879	0.6207	186	0.357367558	0.000825519	1.044525175	0.002412853
3.199211538	×ÔÉí³µÁ¾	Road 1	1.021651102	3.820188332	0.003484045	0.665657997	0	0	28.9865	977.2295	655.7361	3.8794	0.6203	187	0.414297588	0.000957027	1.05142949	0.002428802
3.21579747	×ÔÉí³µÁ¾	Road 1	1.039458246	3.865065765	0.003477736	0.664397836	0	0	29.01	977.2295	655.7361	3.8798	0.6199	188	0.419913959	0.000970001	1.058394154	0.00244489
3.232513897	×ÔÉí³µÁ¾	Road 1	1.057537931	3.893587303	0.003469337	0.664217234	0.011764706	0	29.025	977.2305	655.7361	3.8791	0.6206	189	0.387483828	0.000895088	1.064871499	0.002459853
3.249211629	×ÔÉí³µÁ¾	Road 1	1.07572962	3.92209425	0.003460951	0.663977146	0.011764706	0	29.0402	977.2305	655.7361	3.8794	0.6203	190	0.388160989	0.000896652	1.071352908	0.002474825
3.265875272	×ÔÉí³µÁ¾	Road 1	1.0940915	3.966885853	0.003446308	0.663972199	0.011764706	0	29.0644	977.2305	655.7361	3.8799	0.6199	191	0.422482051	0.000975934	1.078392998	0.002491088
3.282504092	×ÔÉí³µÁ¾	Road 1	1.112499683	3.985217142	0.00343379	0.664142191	0.019607844	0	29.0721	977.2305	655.7361	3.88	0.6197	192	0.368874968	0.000852101	1.084526953	0.002505257
3.299179831	×ÔÉí³µÁ¾	Road 1	1.131148809	4.026019764	0.003417146	0.665427387	0.019607844	0	29.0966	977.2305	655.7361	3.8795	0.6193	193	0.416013911	0.000960992	1.091464292	0.002521283
3.315855203	×ÔÉí³µÁ¾	Road 1	1.149996258	4.068923521	0.003402627	0.666437209	0.027450981	0	29.1202	977.2305	655.7361	3.8799	0.6188	194	0.421641818	0.000973993	1.098495327	0.002537524
3.33249282	×ÔÉí³µÁ¾	Road 1	1.168933517	4.097590113	0.003386084	0.667667806	0.035294119	0	29.1361	977.2305	655.7361	3.8802	0.6186	195	0.392670295	0.000907068	1.105028425	0.002552616
3.349198617	×ÔÉí³µÁ¾	Road 1	1.188081752	4.126330948	0.003367538	0.669317842	0.043137256	0	29.1521	977.2305	655.7361	3.8805	0.6183	196	0.393229282	0.00090836	1.111597633	0.002567791
3.365902947	×ÔÉí³µÁ¾	Road 1	1.207438663	4.17166543	0.00335111	0.671802998	0.043137256	0	29.1774	977.2314	655.7361	3.88	0.6188	197	0.429755925	0.000992736	1.118776418	0.002584374
3.382533966	×ÔÉí³µÁ¾	Road 1	1.226853915	4.202683353	0.003334734	0.673682988	0.050980393	0	29.1949	977.2314	655.7361	3.8803	0.6185	198	0.40017575	0.000924406	1.125431749	0.002599747
3.399151056	×ÔÉí³µÁ¾	Road 1	1.246386869	4.231705713	0.00332045	0.675113618	0.050980393	0	29.2113	977.2314	655.7361	3.8806	0.6182	199	0.396565612	0.000916067	1.132021515	0.00261497
3.415794905	×ÔÉí³µÁ¾	Road 1	1.266153082	4.275355339	0.003308239	0.676342607	0.050980393	0	29.2361	977.2314	655.7361	3.881	0.6177	200	0.429655496	0.000992504	1.139172636	0.002631489
3.432567048	×ÔÉí³µÁ¾	Road 1	1.286207476	4.304507732	0.003302144	0.677162588	0.050980393	0	29.2528	977.2314	655.7361	3.8813	0.6174	201	0.397918541	0.000919192	1.145846583	0.002646906
3.449166176	×ÔÉí³µÁ¾	Road 1	1.30618956	4.333691454	0.003298085	0.677562594	0.050980393	0	29.2696	977.2314	655.7361	3.8816	0.6171	202	0.399330326	0.000922453	1.152475118	0.002662218
3.465868307	×ÔÉí³µÁ¾	Road 1	1.326440752	4.364969444	0.003298085	0.677992582	0.050980393	0	29.2877	977.2314	655.7361	3.882	0.6168	203	0.404338371	0.000934022	1.159228431	0.002677818
3.48248723	×ÔÉí³µÁ¾	Road 1	1.346754811	4.40044241	0.003296057	0.67797178	0.043137256	0	29.3084	977.2324	655.7361	3.8814	0.6174	204	0.41507007	0.000958812	1.166126448	0.002693752
3.499187528	×ÔÉí³µÁ¾	Road 1	1.367400508	4.450489855	0.003296057	0.677131712	0.043137256	0	29.3379	977.2324	655.7361	3.8819	0.6168	205	0.449226826	0.001037714	1.17362867	0.002711082
3.515853737	×ÔÉí³µÁ¾	Road 1	1.388139	4.479637527	0.003296057	0.676281631	0.043137256	0	29.3553	977.2324	655.7361	3.8822	0.6165	206	0.402326703	0.000929375	1.180333931	0.002726571
3.532474859	×ÔÉí³µÁ¾	Road 1	1.408955829	4.508756018	0.003296057	0.675872922	0.043137256	0	29.3728	977.2324	655.7361	3.8825	0.6162	207	0.403109562	0.000931183	1.187034064	0.002742049
3.549115775	×ÔÉí³µÁ¾	Road 1	1.429941552	4.539930582	0.003296057	0.675462484	0.043137256	0	29.3916	977.2324	655.7361	3.8829	0.6159	208	0.40855789	0.000943769	1.193832842	0.002757754
3.565802144	×ÔÉí³µÁ¾	Road 1	1.451138576	4.573150921	0.003289978	0.674623549	0.043137256	0	29.4119	977.2324	655.7361	3.8832	0.6155	209	0.413964336	0.000956258	1.200740403	0.00277371
3.582551194	×ÔÉí³µÁ¾	Road 1	1.472579284	4.608413601	0.003289978	0.674202144	0.043137256	0	29.4335	977.2334	655.7361	3.8827	0.6151	210	0.419369826	0.000968744	1.207764449	0.002789936
3.600180346	×ÔÉí³µÁ¾	Road 1	1.495319103	4.643635082	0.003289978	0.67378211	0.043137256	0	29.4554	977.2334	655.7361	3.8831	0.6147	211	0.415989637	0.000960936	1.215097994	0.002806876
3.615807001	×ÔÉí³µÁ¾	Road 1	1.515628627	4.678818798	0.003287953	0.672942102	0.043137256	0	29.4774	977.2334	655.7361	3.8835	0.6143	212	0.427086982	0.000986571	1.221771935	0.002822293
3.632460013	×ÔÉí³µÁ¾	Road 1	1.537425098	4.711897945	0.003287953	0.672522068	0.043137256	0	29.4983	977.2334	655.736	3.8838	0.6139	213	0.417249621	0.000963847	1.228720398	0.002838344
3.649161045	×ÔÉí³µÁ¾	Road 1	1.559447336	4.747015572	0.003287953	0.672337949	0.043137256	0	29.5206	977.2334	655.736	3.8842	0.6135	214	0.422863368	0.000976814	1.235782652	0.002854658
3.66583825	×ÔÉí³µÁ¾	Road 1	1.581657978	4.794467068	0.003287953	0.671266377	0.043137256	0	29.5511	977.2334	655.736	3.8848	0.613	215	0.454597732	0.001050121	1.243364072	0.002872171
3.682466703	×ÔÉí³µÁ¾	Road 1	1.603936928	4.823312187	0.003287953	0.670427799	0.043137256	0	29.5698	977.2344	655.736	3.8842	0.6136	216	0.409605197	0.000946188	1.250175173	0.002887905
3.69918313	×ÔÉí³µÁ¾	Road 1	1.626467617	4.852142286	0.003287953	0.670007765	0.043137256	0	29.5886	977.2344	655.736	3.8845	0.6133	217	0.409842507	0.000946736	1.257026275	0.002903731
3.715788123	×ÔÉí³µÁ¾	Road 1	1.648990413	4.88299284	0.003287953	0.669592381	0.043137256	0	29.6089	977.2344	655.736	3.8849	0.6129	218	0.416132482	0.000961266	1.263936152	0.002919693
3.732582626	×ÔÉí³µÁ¾	Road 1	1.671933226	4.917926359	0.003287953	0.668750882	0.043137256	0	29.6321	977.2344	655.736	3.8853	0.6125	219	0.426340215	0.000984846	1.271096324	0.002936233
3.749092682	×ÔÉí³µÁ¾	Road 1	1.694647511	4.952825546	0.003285929	0.668322265	0.043137256	0	29.6554	977.2344	655.736	3.8857	0.6121	220	0.428679098	0.000990249	1.27817384	0.002952582
3.76584833	×ÔÉí³µÁ¾	Road 1	1.717852374	4.98563261	0.003279862	0.667906761	0.043137256	0	29.6775	977.2344	655.736	3.8851	0.6117	221	0.422860138	0.000976807	1.285259136	0.002968949
3.782467986	×ÔÉí³µÁ¾	Road 1	1.741029665	5.020455837	0.00326372	0.667066634	0.043137256	0	29.7011	977.2344	655.736	3.8856	0.6112	222	0.429640929	0.000992471	1.29239962	0.002985443
3.799146657	×ÔÉí³µÁ¾	Road 1	1.764526223	5.071603632	0.003249639	0.666226566	0.043137256	0	29.7361	977.2354	655.736	3.8852	0.6116	223	0.473175635	0.001093036	1.300291561	0.003003674
3.815840724	×ÔÉí³µÁ¾	Road 1	1.788110824	5.085912466	0.003231595	0.666226566	0.043137256	0	29.746	977.2354	655.736	3.8854	0.6114	224	0.377176565	0.000871278	1.306588172	0.003018219
3.832513531	×ÔÉí³µÁ¾	Road 1	1.811835663	5.122678041	0.003217607	0.665626466	0.050980393	0	29.7715	977.2354	655.736	3.8859	0.6109	225	0.437113623	0.001009732	1.313876083	0.003035054
3.849131354	×ÔÉí³µÁ¾	Road 1	1.835651927	5.159433317	0.003211624	0.665611148	0.050980393	0	29.7973	977.2354	655.736	3.8863	0.6105	226	0.438396647	0.001012696	1.32116128	0.003051883
3.865869774	×ÔÉí³µÁ¾	Road 1	1.859849955	5.204368258	0.00320764	0.666005611	0.050980393	0	29.8289	977.2354	655.736	3.8869	0.6099	227	0.460697063	0.00106421	1.328872621	0.003069696
3.882483931	×ÔÉí³µÁ¾	Road 1	1.884000353	5.232972622	0.00320764	0.666001081	0.05882353	0	29.8492	977.2363	655.736	3.8863	0.6105	228	0.41834829	0.000966385	1.335823126	0.003085751
3.899175065	×ÔÉí³µÁ¾	Road 1	1.908404866	5.263647652	0.00320565	0.666825473	0.05882353	0	29.8711	977.2363	655.736	3.8867	0.6101	229	0.424294481	0.00098012	1.342905082	0.003102111
3.915780792	×ÔÉí³µÁ¾	Road 1	1.93288282	5.306641102	0.00320565	0.667235374	0.05882353	0	29.9019	977.2363	655.736	3.8873	0.6095	230	0.459527453	0.001061508	1.350535869	0.003119738
3.932508582	×ÔÉí³µÁ¾	Road 1	1.957673969	5.335321426	0.00320565	0.667635322	0.06666667	0	29.9226	977.2363	655.736	3.8876	0.6092	231	0.420337604	0.00097098	1.357567188	0.00313598
3.949167459	×ÔÉí³µÁ¾	Road 1	1.982562241	5.378380537	0.00320565	0.668047011	0.06666667	0	29.9539	977.2363	655.736	3.8882	0.6086	232	0.461489896	0.001066042	1.365255092	0.003153739
3.965772453	×ÔÉí³µÁ¾	Road 1	2.007502373	5.40707674	0.00320565	0.667806923	0.074509807	0	29.9749	977.2363	655.736	3.8886	0.6082	233	0.422594242	0.000976193	1.372272267	0.003169949
3.982488146	×ÔÉí³µÁ¾	Road 1	2.032742016	5.435772943	0.00320565	0.66779691	0.074509807	0	29.9959	977.2373	655.736	3.888	0.6088	234	0.422709796	0.00097646	1.379338154	0.003186271
3.999206772	×ÔÉí³µÁ¾	Road 1	2.058119378	5.464474297	0.00320565	0.668206811	0.082352944	0	30.0171	977.2373	655.736	3.8884	0.6084	235	0.423359126	0.00097796	1.386416137	0.003202621
4.01576448	×ÔÉí³µÁ¾	Road 1	2.083479082	5.513742399	0.00320565	0.66901499	0.082352944	0	30.0537	977.2373	655.736	3.889	0.6078	236	0.484034521	0.00111812	1.394430639	0.003221135
4.03246148	×ÔÉí³µÁ¾	Road 1	2.1091855	5.542499113	0.00320565	0.6690166	0.082352944	0	30.0752	977.2373	655.736	3.8894	0.6074	237	0.425387775	0.000982646	1.401533338	0.003237542
4.049168376	×ÔÉí³µÁ¾	Road 1	2.135040607	5.571255398	0.00320565	0.669004798	0.090196081	0	30.0969	977.2373	655.736	3.8898	0.607	238	0.425989212	0.000984035	1.408650296	0.003253982
4.065873073	×ÔÉí³µÁ¾	Road 1	2.161092555	5.614409781	0.00320565	0.669822156	0.098039217	0	30.1295	977.2373	655.736	3.8904	0.6064	239	0.46852988	0.001082304	1.416476946	0.003272062
4.082446542	×ÔÉí³µÁ¾	Road 1	2.187082067	5.645301962	0.00320565	0.671060324	0.105882354	0	30.1529	977.2383	655.736	3.8899	0.6069	240	0.434594987	0.001003914	1.423679692	0.0032887
4.099147574	×ÔÉí³µÁ¾	Road 1	2.213405697	5.674204588	0.00320565	0.672710419	0.113725491	0	30.175	977.2383	655.736	3.8903	0.6065	241	0.428778331	0.000990478	1.430840733	0.003305242
4.115899923	×ÔÉí³µÁ¾	Road 1	2.240012758	5.717730618	0.00320565	0.675835848	0.121568628	0	30.2082	977.2383	655.7359	3.8909	0.6059	242	0.472366327	0.001091166	1.438753978	0.003323522
4.13251628	×ÔÉí³µÁ¾	Road 1	2.266471021	5.732288361	0.00320565	0.676645875	0.121568628	0	30.2193	977.2383	655.7359	3.8901	0.6057	243	0.38793031	0.000896119	1.445199967	0.003338412
4.149175157	×ÔÉí³µÁ¾	Road 1	2.293267324	5.790707731	0.00320565	0.679115832	0.129411772	0	30.2641	977.2383	655.7359	3.8909	0.6049	244	0.519645007	0.00120038	1.453856669	0.003358409
4.165815707	×ÔÉí³µÁ¾	Road 1	2.320169675	5.820027924	0.00320565	0.680765867	0.137254909	0	30.2867	977.2393	655.7359	3.8904	0.6055	245	0.433664777	0.001001766	1.46107309	0.003375079
4.182489979	×ÔÉí³µÁ¾	Road 1	2.347262794	5.849444246	0.00320565	0.683241367	0.145098045	0	30.3094	977.2393	655.7359	3.8908	0.6051	246	0.434451774	0.001003584	1.468317257	0.003391813
4.199219969	×ÔÉí³µÁ¾	Road 1	2.374662219	5.895875216	0.00320565	0.685911417	0.145098045	0	30.3453	977.2393	655.7359	3.8914	0.6044	247	0.486707811	0.001124295	1.476459873	0.003410622
4.215844023	×ÔÉí³µÁ¾	Road 1	2.401956557	5.910689163	0.00320565	0.686741412	0.152941182	0	30.3568	977.2393	655.7359	3.8916	0.6042	248	0.391433177	0.000904211	1.48296708	0.003425654
4.232531492	×ÔÉí³µÁ¾	Road 1	2.429561719	5.955282068	0.00320565	0.689601362	0.160784319	0	30.3914	977.2393	655.7359	3.8923	0.6036	249	0.483331811	0.001116496	1.491032664	0.003444285
4.249249751	×ÔÉí³µÁ¾	Road 1	2.457356444	5.985133123	0.00320565	0.691251457	0.160784319	0	30.4146	977.2393	655.7358	3.8927	0.6032	250	0.438674673	0.001013338	1.498366541	0.003461227
4.265762373	×ÔÉí³µÁ¾	Road 1	2.485035109	6.034365606	0.00320565	0.694557011	0.168627456	0	30.453	977.2402	655.7359	3.8924	0.6034	251	0.501781775	0.001159116	1.506652274	0.003480367
4.282556876	×ÔÉí³µÁ¾	Road 1	2.513326548	6.06443553	0.00320565	0.695587039	0.168627456	0	30.4766	977.2402	655.7358	3.8928	0.603	252	0.440770995	0.001018181	1.514054804	0.003497467
4.299587808	×ÔÉí³µÁ¾	Road 1	2.542158892	6.094583559	0.00320565	0.697237015	0.176470593	0	30.5002	977.2402	655.7358	3.8933	0.6026	253	0.440406414	0.001017339	1.521555335	0.003514793
4.315848972	×ÔÉí³µÁ¾	Road 1	2.569912547	6.144280815	0.00320565	0.700127065	0.184313729	0	30.5393	977.2402	655.7358	3.894	0.6019	254	0.509412508	0.001176743	1.529838976	0.003533928
4.332424641	×ÔÉí³µÁ¾	Road 1	2.598342849	6.174658012	0.003203659	0.702171326	0.192156866	0	30.5633	977.2402	655.7358	3.8944	0.6014	255	0.445576394	0.001029281	1.537224702	0.003550989
4.349583867	×ÔÉí³µÁ¾	Road 1	2.62791937	6.205144215	0.00320167	0.704221308	0.192156866	0	30.5873	977.2412	655.7358	3.8939	0.602	256	0.443301341	0.001024026	1.544831411	0.003568561
4.365823404	×ÔÉí³µÁ¾	Road 1	2.656058458	6.237906647	0.003197694	0.70586127	0.192156866	0	30.6133	977.2412	655.7358	3.8943	0.6015	257	0.456987738	0.001055642	1.55225268	0.003585704
4.382495111	×ÔÉí³µÁ¾	Road 1	2.685108554	6.272923851	0.003195707	0.706681311	0.192156866	0	30.6411	977.2412	655.7358	3.8948	0.601	258	0.462335076	0.001067994	1.559960595	0.003603509
4.399486088	×ÔÉí³µÁ¾	Road 1	2.714890795	6.310176516	0.003187769	0.707501233	0.200000003	0	30.6708	977.2412	655.7358	3.8954	0.6005	259	0.468288322	0.001081746	1.567917271	0.003621889
4.415786107	×ÔÉí³µÁ¾	Road 1	2.743630851	6.347489691	0.00317193	0.708731234	0.200000003	0	30.7007	977.2412	655.7358	3.8959	0.5999	260	0.474571219	0.00109626	1.575652791	0.003639758
4.432522328	×ÔÉí³µÁ¾	Road 1	2.77337505	6.398046541	0.003148272	0.709541202	0.200000003	0	30.7414	977.2422	655.7358	3.8957	0.6002	261	0.51612827	0.001192256	1.584290827	0.003659712
4.449312066	×ÔÉí³µÁ¾	Road 1	2.803358042	6.42885375	0.003118864	0.710131407	0.20784314	0	30.7663	977.2422	655.7358	3.8961	0.5997	262	0.451700376	0.001043428	1.591874758	0.003677231
4.465779234	×ÔÉí³µÁ¾	Road 1	2.832906171	6.459718037	0.003074129	0.711355686	0.20784314	0	30.7914	977.2422	655.7358	3.8956	0.5992	263	0.454624136	0.001050182	1.599361131	0.003694524
4.482432613	×ÔÉí³µÁ¾	Road 1	2.862941758	6.492863274	0.003024076	0.712995708	0.20784314	0	30.8184	977.2422	655.7358	3.8961	0.5988	264	0.461893103	0.001066973	1.607053211	0.003712293
4.499314723	×ÔÉí³µÁ¾	Road 1	2.893639294	6.546049547	0.00297457	0.714855611	0.20784314	0	30.8619	977.2422	655.7358	3.8969	0.598	265	0.528413263	0.001220635	1.615973942	0.0037329
4.515772361	×ÔÉí³µÁ¾	Road 1	2.923707213	6.577159309	0.002899466	0.716504514	0.215686277	0	30.8874	977.2432	655.7358	3.8964	0.5985	266	0.458345185	0.001058777	1.623517221	0.003750325
4.532442968	×ÔÉí³µÁ¾	Road 1	2.954308686	6.608355761	0.00283663	0.71856451	0.215686277	0	30.913	977.2432	655.7358	3.8969	0.598	267	0.45801715	0.00105802	1.631152645	0.003767963
4.549293188	×ÔÉí³µÁ¾	Road 1	2.985470183	6.657562494	0.002763877	0.721028984	0.215686277	0	30.9536	977.2432	655.7358	3.8976	0.5973	268	0.51917482	0.001199294	1.639900855	0.003788171
4.565912477	×ÔÉí³µÁ¾	Road 1	3.016360102	6.691243315	0.002685296	0.722268939	0.223529413	0	30.9814	977.2432	655.7358	3.8981	0.5968	269	0.468937928	0.001083247	1.64769427	0.003806174
4.582509407	×ÔÉí³µÁ¾	Road 1	3.047353996	6.722810984	0.002615165	0.725954175	0.223529413	0	31.0075	977.2432	655.7358	3.8986	0.5963	270	0.462533264	0.001068452	1.655370902	0.003823907
4.59924856	×ÔÉí³µÁ¾	Road 1	3.078760888	6.754512119	0.002527532	0.728834152	0.223529413	0	31.0337	977.2441	655.7358	3.8981	0.5968	271	0.462823029	0.001069121	1.663118168	0.003841803
4.617405919	×ÔÉí³µÁ¾	Road 1	3.113092688	6.80685339	0.002451854	0.732528329	0.223529413	0	31.077	977.2441	655.7358	3.8989	0.596	272	0.521861009	0.001205499	1.672593785	0.003863692
4.632422258	×ÔÉí³µÁ¾	Road 1	3.141618958	6.838855362	0.002376072	0.734334528	0.223529413	0	31.1035	977.2441	655.7357	3.8993	0.5955	273	0.478849575	0.001106143	1.679784353	0.003880302
4.649108994	×ÔÉí³µÁ¾	Road 1	3.173477989	6.873274326	0.002293895	0.736834764	0.23137255	0	31.1321	977.2441	655.7357	3.8999	0.595	274	0.475670941	0.0010988	1.687721748	0.003898637
4.665810758	×ÔÉí³µÁ¾	Road 1	3.20559058	6.921743345	0.002218305	0.74235338	0.239215687	0	31.1724	977.2441	655.7357	3.9006	0.5943	275	0.52682027	0.001216955	1.696520576	0.003918963
4.69932462	×ÔÉí³µÁ¾	Road 1	3.270789035	7.003503084	0.002147439	0.751787424	0.239215687	0	31.2401	977.2451	655.7357	3.9008	0.594	276	0.501263198	0.001157918	1.713319842	0.003957769
4.71576613	×ÔÉí³µÁ¾	Road 1	3.302914647	7.03415966	0.002072142	0.753427744	0.239215687	0	31.2537	977.2451	655.7357	3.9011	0.5938	277	0.467809398	0.00108064	1.721011335	0.003975536
4.732409978	×ÔÉí³µÁ¾	Road 1	3.335622151	7.074506521	0.001922618	0.760834038	0.254901975	0	31.2987	977.2451	655.7357	3.9019	0.593	278	0.50280711	0.001161484	1.72937998	0.003994868
4.749172591	×ÔÉí³µÁ¾	Road 1	3.368719128	7.108027697	0.001858233	0.766568422	0.262745112	0	31.3263	977.2451	655.7357	3.9024	0.5925	279	0.477834964	0.001103799	1.737389743	0.00401337
4.765746061	×ÔÉí³µÁ¾	Road 1	3.401676875	7.158904696	0.001781812	0.776378572	0.270588249	0	31.3679	977.2461	655.7357	3.9022	0.5927	280	0.544924176	0.001258775	1.746421027	0.004034233
4.78248778	×ÔÉí³µÁ¾	Road 1	3.435129026	7.193272161	0.001721943	0.784173369	0.278431386	0	31.3958	977.2461	655.7357	3.9027	0.5922	281	0.483253494	0.001116316	1.754511521	0.004052922
4.799123564	×ÔÉí³µÁ¾	Road 1	3.468530113	7.228028011	0.00166086	0.791501522	0.278431386	0	31.4239	977.2461	655.7357	3.9032	0.5917	282	0.486406331	0.001123599	1.762603272	0.004071614
4.815758982	×ÔÉí³µÁ¾	Road 1	3.502186371	7.283407688	0.001597484	0.803557575	0.286274523	0	31.4682	977.2461	655.7357	3.903	0.5909	283	0.565390857	0.001306053	1.772008785	0.00409334
4.832496669	×ÔÉí³µÁ¾	Road 1	3.536215797	7.319167328	0.001543064	0.812542081	0.301960796	0	31.4966	977.2471	655.7357	3.9026	0.5913	284	0.49173315	0.001135904	1.780239261	0.004112353
4.84907747	×ÔÉí³µÁ¾	Road 1	3.570093231	7.355420494	0.00149827	0.822734237	0.309803933	0	31.5252	977.2471	655.7357	3.9031	0.5908	285	0.49584909	0.001145411	1.788460836	0.004131345
4.865764205	×ÔÉí³µÁ¾	Road 1	3.604456475	7.413533878	0.001448484	0.841282845	0.325490206	0	31.5703	977.2471	655.7357	3.9039	0.59	286	0.579908663	0.001339589	1.798137618	0.004153698
4.882482098	×ÔÉí³µÁ¾	Road 1	3.639059435	7.451337147	0.001413605	0.85511905	0.34117648	0	31.5992	977.2471	655.7357	3.9044	0.5895	287	0.503196765	0.001162385	1.806550008	0.004173131
4.899101388	×ÔÉí³µÁ¾	Road 1	3.673726591	7.509452248	0.001378157	0.878665864	0.356862754	0	31.6428	977.248	655.7357	3.9043	0.5896	288	0.584461833	0.001350107	1.816263348	0.004195568
4.915801319	×ÔÉí³µÁ¾	Road 1	3.70874652	7.549237347	0.001346653	0.89610219	0.380392164	0	31.6721	977.248	655.7357	3.9048	0.5891	289	0.513732087	0.001186721	1.824842639	0.004215386
4.932510781	×ÔÉí³µÁ¾	Road 1	3.743975617	7.589995766	0.001315633	0.917548716	0.403921574	0	31.7016	977.248	655.7357	3.9053	0.5886	290	0.518599816	0.001197966	1.833508163	0.004235404
4.949107344	×ÔÉí³µÁ¾	Road 1	3.779159798	7.631884575	0.00129377	0.941369176	0.435294122	0	31.7312	977.248	655.7357	3.9059	0.588	291	0.525367933	0.0012136	1.842227465	0.004255545
4.965732498	×ÔÉí³µÁ¾	Road 1	3.81473581	7.703606415	0.001267856	0.988042176	0.466666669	0	31.7802	977.249	655.7357	3.9058	0.5881	292	0.645785536	0.001491765	1.852963749	0.004280346
4.982437928	×ÔÉí³µÁ¾	Road 1	3.850695493	7.749268341	0.001251837	1.020078897	0.490196079	0	31.8102	977.249	655.7356	3.9063	0.5876	293	0.542783018	0.001253829	1.862031173	0.004301292
4.999147757	×ÔÉí³µÁ¾	Road 1	3.886997642	7.821009922	0.001237008	1.073144197	0.513725519	0	31.8556	977.249	655.7356	3.9071	0.5868	294	0.649684051	0.00150077	1.872887282	0.00432637
5.015738088	×ÔÉí³µÁ¾	Road 1	3.923271224	7.871144485	0.001223343	1.111241102	0.53725493	0	31.8862	977.249	655.7356	3.9077	0.5862	295	0.566122757	0.001307744	1.882279446	0.004348066
5.032495569	×ÔÉí³µÁ¾	Road 1	3.960170392	7.92702713	0.001216027	1.153158545	0.545098066	0	31.9191	977.25	655.7356	3.9073	0.5866	296	0.589299631	0.001361282	1.892154623	0.004370877
5.04914455	×ÔÉí³µÁ¾	Road 1	3.997099791	7.98522377	0.001213942	1.196475625	0.56078434	0	31.9522	977.25	655.7356	3.9079	0.586	297	0.602446664	0.001391652	1.902184746	0.004394047
5.065810025	×ÔÉí³µÁ¾	Road 1	4.034365177	8.049898911	0.001212901	1.238050342	0.568627477	0	31.9834	977.25	655.7356	3.9085	0.5854	298	0.631500533	0.001458766	1.912709002	0.004418358
5.082413552	×ÔÉí³µÁ¾	Road 1	4.071862421	8.130204678	0.001212901	1.298447847	0.568627477	0	32.0306	977.25	655.7356	3.9093	0.5846	299	0.70138594	0.001620202	1.924354483	0.004445259
5.0990607	×ÔÉí³µÁ¾	Road 1	4.109742744	8.191743565	0.001212901	1.338028908	0.576470613	0	32.0623	977.251	655.7356	3.9089	0.585	300	0.624427848	0.001442428	1.934749426	0.004469271
5.115782991	×ÔÉí³µÁ¾	Road 1	4.148240075	8.287763214	0.001212901	1.396306396	0.576470613	0	32.1104	977.251	655.7356	3.9098	0.5841	301	0.773336325	0.001786407	1.947681381	0.004499144
5.132468627	×ÔÉí³µÁ¾	Road 1	4.186960798	8.354167843	0.001212901	1.433171034	0.576470613	0	32.1428	977.251	655.7356	3.9104	0.5835	302	0.651158873	0.001504177	1.958546381	0.004524242
5.14916526	×ÔÉí³µÁ¾	Road 1	4.226023517	8.422404099	0.001212901	1.468718171	0.576470613	0	32.1754	977.251	655.7356	3.911	0.5829	303	0.661767264	0.001528682	1.969595666	0.004549766
5.165758524	×ÔÉí³µÁ¾	Road 1	4.265378632	8.538309002	0.001212901	1.524867892	0.576470613	0	32.2296	977.252	655.7356	3.911	0.5829	304	0.878323209	0.002028927	1.984169915	0.004583433
5.182453324	×ÔÉí³µÁ¾	Road 1	4.305166438	8.579683685	0.001212901	1.543028355	0.576470613	0	32.2486	977.252	655.7355	3.9114	0.5825	305	0.550042212	0.001270598	1.993352759	0.004604645
5.199263589	×ÔÉí³µÁ¾	Road 1	4.345698043	8.680040359	0.001212901	1.585595489	0.576470613	0	32.2942	977.252	655.7355	3.9122	0.5817	306	0.812745683	0.001877443	2.00701523	0.004636205
5.215767779	×ÔÉí³µÁ¾	Road 1	4.386116513	8.81633606	0.00120874	1.637940645	0.576470613	0	32.3549	977.2529	655.7355	3.9123	0.5816	307	0.992908486	0.002293619	2.02340238	0.004674059
5.250209395	×ÔÉí³µÁ¾	Road 1	4.472304713	9.008796787	0.001203553	1.701484442	0.576470613	0	32.4391	977.2529	655.7355	3.9138	0.5801	308	0.800470543	0.001849087	2.050971879	0.004737745
5.265733048	×ÔÉí³µÁ¾	Road 1	4.511502926	9.090229511	0.001195285	1.72583878	0.576470613	0	32.4743	977.2539	655.7355	3.9135	0.5804	309	0.780946764	0.001803987	2.063095026	0.00476575
5.282542947	×ÔÉí³µÁ¾	Road 1	4.554334717	9.172836399	0.001167659	1.747869849	0.576470613	0	32.5099	977.2539	655.7355	3.9141	0.5798	310	0.759144352	0.001753623	2.075856165	0.004795228
5.319466881	×ÔÉí³µÁ¾	Road 1	4.650773219	9.402535629	0.001152497	1.804028511	0.576470613	0	32.6079	977.2539	655.7355	3.9159	0.577	311	0.872442965	0.002015343	2.108070192	0.004869642
5.368754387	×ÔÉí³µÁ¾	Road 1	4.783522645	9.696127224	0.001131492	1.860473394	0.576470613	0	32.7326	977.2549	655.7355	3.9172	0.5757	312	0.866992685	0.002002753	2.1508021	0.004968353
5.384736602	×ÔÉí³µÁ¾	Road 1	4.827163907	9.830211067	0.001078653	1.882393718	0.576470613	0	32.7896	977.2559	655.7355	3.9173	0.5757	313	1.084310599	0.002504757	2.168131784	0.005008384
5.399299878	×ÔÉí³µÁ¾	Road 1	4.867295789	9.920486069	0.001007112	1.896668434	0.58431375	0	32.828	977.2559	655.7355	3.918	0.575	314	0.90618152	0.002093279	2.181328756	0.005038869
5.415739555	×ÔÉí³µÁ¾	Road 1	4.91301398	10.01147947	0.000985196	1.910892367	0.58431375	0	32.8668	977.2559	655.7355	3.9187	0.5742	315	0.854572156	0.001974062	2.195377646	0.005071322
5.432505466	×ÔÉí³µÁ¾	Road 1	4.960066375	10.10315609	0.000968969	1.923762679	0.58431375	0	32.9059	977.2568	655.7355	3.9184	0.5745	316	0.853834994	0.001972359	2.209692968	0.005104391
5.44935422	×ÔÉí³µÁ¾	Road 1	5.007814222	10.2020751	0.00095115	1.936776519	0.592156887	0	32.9482	977.2568	655.7354	3.9192	0.5737	317	0.894462996	0.00206621	2.224763554	0.005139204
5.46573818	×ÔÉí³µÁ¾	Road 1	5.054972287	10.36190472	0.000932676	1.959846854	0.600000024	0	33.0168	977.2568	655.7354	3.9204	0.5725	318	1.247411881	0.002881521	2.245201101	0.005186415
5.482394491	×ÔÉí³µÁ¾	Road 1	5.103349861	10.4560524	0.000917032	1.973280787	0.600000024	0	33.0573	977.2578	655.7354	3.9202	0.5727	319	0.889779164	0.00205539	2.26002154	0.00522065
5.49919156	×ÔÉí³µÁ¾	Road 1	5.152578582	10.55085239	0.000906701	1.98589325	0.607843161	0	33.0981	977.2578	655.7354	3.9209	0.572	320	0.894356932	0.002065965	2.275044115	0.005255352
5.515778959	×ÔÉí³µÁ¾	Road 1	5.201853677	10.6942832	0.000893048	2.005699873	0.615686297	0	33.1601	977.2578	655.7354	3.9221	0.5709	321	1.17696969	0.0027188	2.294566981	0.00530045
5.532479991	×ÔÉí³µÁ¾	Road 1	5.251913898	10.79075861	0.000883741	2.019650221	0.615686297	0	33.2019	977.2588	655.7354	3.9209	0.5711	322	0.920209324	0.002125684	2.309935426	0.005335951
5.549471701	×ÔÉí³µÁ¾	Road 1	5.30333668	10.89484291	0.000871989	2.032862663	0.623529434	0	33.2471	977.2588	655.7354	3.9217	0.5703	323	0.958725429	0.002214656	2.32622581	0.005373582
5.56570574	×ÔÉí³µÁ¾	Road 1	5.353160958	11.04884634	0.000859515	2.052712917	0.623529434	0	33.3142	977.2588	655.7354	3.9229	0.5691	324	1.285425769	0.002969334	2.347093462	0.005421786
5.582430597	×ÔÉí³µÁ¾	Road 1	5.404720734	11.09816294	0.000842251	2.058446646	0.623529434	0	33.3357	977.2588	655.7354	3.9233	0.5687	325	0.668500708	0.001544237	2.358274041	0.005447613
5.599190644	×ÔÉí³µÁ¾	Road 1	5.457247377	11.28254099	0.000818793	2.077717066	0.623529434	0	33.4165	977.2598	655.7354	3.9238	0.5682	326	1.451628482	0.003353262	2.382603403	0.005503814
5.61575495	×ÔÉí³µÁ¾	Road 1	5.50962054	11.38251057	0.000789501	2.086638927	0.623529434	0	33.4606	977.2598	655.7354	3.9246	0.5674	327	0.979594427	0.002262863	2.398829704	0.005541297
5.633160502	×ÔÉí³µÁ¾	Road 1	5.565382298	11.53323526	0.000757108	2.098003626	0.623529434	0	33.5275	977.2607	655.7354	3.9248	0.5671	328	1.247162478	0.002880945	2.420537256	0.005591441
5.649627304	×ÔÉí³µÁ¾	Road 1	5.618367228	11.58365479	0.000723397	2.101157188	0.623529434	0	33.55	977.2607	655.7354	3.9252	0.5667	329	0.695940448	0.001607622	2.431997169	0.005617913
5.665706656	×ÔÉí³µÁ¾	Road 1	5.670912728	11.7643919	0.000684995	2.112151623	0.623529434	0	33.6311	977.2617	655.7353	3.9257	0.5662	330	1.525499056	0.003523903	2.456526206	0.005674576
5.682440677	×ÔÉí³µÁ¾	Road 1	5.726069917	11.86599913	0.000645238	2.117281675	0.623529434	0	33.677	977.2617	655.7353	3.9266	0.5654	331	1.012271869	0.002338348	2.473465585	0.005713706
5.699518162	×ÔÉí³µÁ¾	Road 1	5.782842265	11.96783123	0.000605738	2.121301889	0.623529434	0	33.7234	977.2617	655.7353	3.9274	0.5645	332	1.007181136	0.002326588	2.490665705	0.005753438
5.715760265	×ÔÉí³µÁ¾	Road 1	5.837561189	12.1282402	0.000561629	2.126986027	0.623529434	0	33.797	977.2627	655.7353	3.9278	0.5642	333	1.422620887	0.003286254	2.51377206	0.005806813
5.732368191	×ÔÉí³µÁ¾	Road 1	5.893984373	12.23051348	0.000522679	2.129386425	0.623529434	0	33.8444	977.2627	655.7353	3.9286	0.5633	334	1.043290123	0.00241	2.531098945	0.005846839
5.749137402	×ÔÉí³µÁ¾	Road 1	5.951432453	12.3329052	0.000485573	2.131696939	0.623529434	0	33.8922	977.2627	655.7352	3.9295	0.5625	335	1.043995779	0.00241163	2.548605931	0.00588728
5.765729199	×ÔÉí³µÁ¾	Road 1	6.00898156	12.4866992	0.000444909	2.135182381	0.623529434	0	33.9646	977.2637	655.7352	3.9298	0.5621	336	1.391204502	0.003213682	2.571688514	0.0059406
5.782447092	×ÔÉí³µÁ¾	Road 1	6.067444952	12.58939819	0.000413149	2.137766361	0.623529434	0	34.0134	977.2637	655.7352	3.9307	0.5612	337	1.063539473	0.002456776	2.589468653	0.005981673
5.799114767	×ÔÉí³µÁ¾	Road 1	6.126446886	12.7436471	0.000382937	2.140547037	0.623529434	0	34.0873	977.2646	655.7352	3.9311	0.5609	338	1.412136042	0.003262034	2.613005677	0.006036043
5.815719027	×ÔÉí³µÁ¾	Road 1	6.185699127	12.84658642	0.000352405	2.141906977	0.623529434	0	34.137	977.2646	655.7352	3.932	0.56	339	1.085436158	0.002507358	2.631028542	0.006077676
5.832387435	×ÔÉí³µÁ¾	Road 1	6.245691242	12.95694323	0.000330931	2.143273115	0.623529434	0	34.1908	977.2646	655.7352	3.933	0.559	340	1.138964519	0.002631008	2.650013267	0.006121531
5.849161045	×ÔÉí³µÁ¾	Road 1	6.306782139	13.11150284	0.000312451	2.143907785	0.623529434	0	34.2669	977.2656	655.7352	3.9334	0.5586	341	1.439907394	0.003326186	2.674165711	0.006177323
5.86568283	×ÔÉí³µÁ¾	Road 1	6.367428831	13.21455803	0.000293862	2.144067764	0.623529434	0	34.3181	977.2656	655.7352	3.9343	0.5577	342	1.112327934	0.002569478	2.692543355	0.006219775
5.882413552	×ÔÉí³µÁ¾	Road 1	6.429321391	13.31760893	0.00028307	2.144007444	0.623529434	0	34.3697	977.2666	655.7352	3.9343	0.5577	343	1.109724701	0.002563464	2.71110985	0.006262664
5.899257541	×ÔÉí³µÁ¾	Road 1	6.49214948	13.42800264	0.000274475	2.14337182	0.623529434	0	34.4254	977.2666	655.7352	3.9353	0.5567	344	1.161856898	0.002683889	2.730680154	0.006307871
5.91570968	×ÔÉí³µÁ¾	Road 1	6.55402028	13.53835344	0.000269097	2.142251968	0.623529434	0	34.4816	977.2666	655.7352	3.9363	0.5557	345	1.186851219	0.002741626	2.750206396	0.006352977
5.932430506	×ÔÉí³µÁ¾	Road 1	6.617720955	13.71477928	0.000267954	2.140223742	0.623529434	0	34.5725	977.2676	655.7351	3.937	0.555	346	1.649192075	0.003809634	2.777782249	0.006416677
5.949157929	×ÔÉí³µÁ¾	Road 1	6.681924575	13.81761131	0.000267574	2.139448166	0.631372571	0	34.626	977.2686	655.7351	3.937	0.555	347	1.138822075	0.002630679	2.796831808	0.006460681
5.965711238	×ÔÉí³µÁ¾	Road 1	6.745932684	13.92043047	0.000267574	2.139384508	0.631372571	0	34.68	977.2686	655.7351	3.9379	0.554	348	1.152741442	0.002662833	2.815913493	0.00650476
5.982396141	×ÔÉí³µÁ¾	Road 1	6.811198334	14.08197241	0.000267574	2.138360977	0.631372571	0	34.7655	977.2695	655.7351	3.9385	0.5534	349	1.581020089	0.003652156	2.84229266	0.006565696
5.999246727	×ÔÉí³µÁ¾	Road 1	6.877593092	14.18473663	0.000267574	2.138301134	0.639215708	0	34.8205	977.2695	655.7351	3.9395	0.5524	350	1.155203839	0.002668521	2.861758522	0.006610662
6.015747252	×ÔÉí³µÁ¾	Road 1	6.94307961	14.28751287	0.000269861	2.1389575	0.639215708	0	34.8759	977.2695	655.7351	3.9405	0.5514	351	1.17742677	0.002719856	2.881186682	0.006655541
6.032411261	×ÔÉí³µÁ¾	Road 1	7.009724816	14.39766026	0.00027101	2.139253855	0.639215708	0	34.9357	977.2705	655.7351	3.9406	0.5513	352	1.231267136	0.002844227	2.901704529	0.006702937
6.049246086	×ÔÉí³µÁ¾	Road 1	7.077911693	14.58124866	0.000272546	2.139140368	0.639215708	0	35.0363	977.2705	655.735	3.9425	0.5495	353	1.778941223	0.004109354	2.931652692	0.006772118
6.065679531	×ÔÉí³µÁ¾	Road 1	7.144942126	14.68405151	0.000274475	2.138730288	0.639215708	0	35.0932	977.2715	655.735	3.9425	0.5494	354	1.205274953	0.002784185	2.951459512	0.006817871
6.082442144	×ÔÉí³µÁ¾	Road 1	7.213622805	14.75011368	0.000276025	2.13833046	0.639215708	0	35.13	977.2715	655.735	3.9432	0.5488	355	0.915963237	0.002115875	2.966813449	0.006853339
6.09923848	×ÔÉí³µÁ¾	Road 1	7.283331437	14.9408226	0.000277191	2.135683298	0.639215708	0	35.2373	977.2725	655.735	3.9442	0.5478	356	1.872883795	0.004326362	2.998271034	0.006926006
6.11574267	×ÔÉí³µÁ¾	Road 1	7.352297883	15.04340401	0.000279924	2.134080887	0.639215708	0	35.2956	977.2725	655.735	3.9452	0.5467	357	1.222290517	0.002823491	3.01844395	0.006972606
6.132421708	×ÔÉí³µÁ¾	Road 1	7.422537646	15.16053543	0.000281101	2.132590771	0.639215708	0	35.3543	977.2734	655.735	3.9453	0.5466	358	1.334450252	0.00308258	3.040701296	0.00702402
6.149294288	×ÔÉí³µÁ¾	Road 1	7.494243527	15.29944897	0.000281888	2.128670692	0.639215708	0	35.4431	977.2734	655.735	3.9469	0.545	359	1.502612648	0.003471035	3.066054248	0.007082585
6.165696209	×ÔÉí³µÁ¾	Road 1	7.564448126	15.40896034	0.00028307	2.12649703	0.639215708	0	35.5071	977.2744	655.735	3.9471	0.5448	360	1.305788572	0.003016372	3.087471689	0.00713206
6.182441594	×ÔÉí³µÁ¾	Road 1	7.636665304	15.52558193	0.000284256	2.122817039	0.639215708	0	35.5672	977.2744	655.735	3.9482	0.5438	361	1.351670645	0.003122359	3.110105934	0.007184345
6.199265788	×ÔÉí³µÁ¾	Road 1	7.709867578	15.66364403	0.000285445	2.114546776	0.639215708	0	35.6582	977.2754	655.735	3.9489	0.5431	362	1.527758781	0.003529123	3.135809244	0.007243719
6.215764114	×ÔÉí³µÁ¾	Road 1	7.782116621	15.76502724	0.000286637	2.108976603	0.639215708	0	35.7193	977.2754	655.7349	3.95	0.542	363	1.257133913	0.002903979	3.156549849	0.00729163
6.232373139	×ÔÉí³µÁ¾	Road 1	7.85554952	15.91655273	0.000287833	2.100066423	0.639215708	0	35.8117	977.2764	655.7349	3.9507	0.5413	364	1.672706202	0.003863951	3.18433187	0.007355807
6.249095431	×ÔÉí³µÁ¾	Road 1	7.929950749	16.0172081	0.000288632	2.09422636	0.639215708	0	35.8738	977.2764	655.7349	3.9518	0.5401	365	1.255144441	0.002899384	3.205320761	0.007404291
6.265773003	×ÔÉí³µÁ¾	Road 1	8.004617983	16.11757679	0.00029144	2.088426113	0.639215708	0	35.9363	977.2773	655.7349	3.952	0.54	366	1.261007865	0.002912928	3.22635131	0.007452872
6.282373598	×ÔÉí³µÁ¾	Road 1	8.07963247	16.26761913	0.000293862	2.080698252	0.639215708	0	36.0308	977.2783	655.7349	3.9527	0.5392	367	1.691319761	0.003906949	3.254428224	0.007517729
6.299477108	×ÔÉí³µÁ¾	Road 1	8.15739315	16.36730976	0.000297519	2.075294495	0.639215708	0	36.0943	977.2783	655.7349	3.9539	0.5381	368	1.249231206	0.002885724	3.275794463	0.007567085
6.315707114	×ÔÉí³µÁ¾	Road 1	8.231854165	16.51629982	0.00030203	2.066264391	0.639215708	0	36.1902	977.2793	655.7349	3.9546	0.5373	369	1.732831014	0.00400284	3.303918321	0.007632051
6.332396416	×ÔÉí³µÁ¾	Road 1	8.308881209	16.61527634	0.00030617	2.06085062	0.639215708	0	36.2546	977.2793	655.7349	3.9558	0.5361	370	1.278252286	0.002952763	3.325251459	0.007681331
6.382481548	×ÔÉí³µÁ¾	Road 1	8.544740128	16.95297718	0.000309928	2.048320532	0.647058845	0	36.4785	977.2813	655.7348	3.9579	0.534	371	1.409848009	0.003256749	3.395863884	0.007844446
6.39908141	×ÔÉí³µÁ¾	Road 1	8.623363819	17.05106277	0.000313717	2.044760466	0.654901981	0	36.5446	977.2813	655.7348	3.9591	0.5328	372	1.300808415	0.003004867	3.417457124	0.007894326
6.415712429	×ÔÉí³µÁ¾	Road 1	8.702846374	17.20503101	0.000330056	2.045124054	0.678431392	0	36.6493	977.2822	655.7347	3.9601	0.5319	373	1.804172085	0.004167638	3.447462344	0.007963638
6.432470643	×ÔÉí³µÁ¾	Road 1	8.783393683	17.30317497	0.000334889	2.049594164	0.686274529	0	36.7164	977.2822	655.7347	3.9613	0.5307	374	1.307835583	0.0030211	3.469379333	0.008014266
6.449061708	×ÔÉí³µÁ¾	Road 1	8.863591124	17.40158329	0.000340215	2.055234194	0.694117665	0	36.7839	977.2832	655.7347	3.9615	0.5304	375	1.324812167	0.003060316	3.491359377	0.00806504
6.465687229	×ÔÉí³µÁ¾	Road 1	8.944672241	17.55686474	0.000345597	2.066087961	0.701960802	0	36.8907	977.2842	655.7347	3.9625	0.5295	376	1.847398985	0.004267492	3.522073347	0.008135989
6.482345373	×ÔÉí³µÁ¾	Road 1	9.026371942	17.65616398	0.000349217	2.07463789	0.717647076	0	36.9592	977.2842	655.7347	3.9637	0.5282	377	1.344322433	0.003105385	3.544467264	0.008187719
6.499177265	×ÔÉí³µÁ¾	Road 1	9.109624576	17.80604839	0.000352405	2.09060812	0.725490212	0	37.0627	977.2852	655.7347	3.9646	0.5273	378	1.802987893	0.004164902	3.574814961	0.008257823
6.515772728	×ÔÉí³µÁ¾	Road 1	9.192171818	17.90670547	0.000354693	2.1036973	0.749019623	0	37.1321	977.2852	655.7347	3.9659	0.5261	379	1.375243072	0.003176811	3.597637757	0.008310543
6.532352429	×ÔÉí³µÁ¾	Road 1	9.27510726	18.00802002	0.000356072	2.097197056	0.75686276	0	37.202	977.2861	655.7347	3.9662	0.5258	380	1.388373128	0.003207142	3.620656569	0.008363717
6.54912164	×ÔÉí³µÁ¾	Road 1	9.359702644	18.16086559	0.000357453	2.148549318	0.764705896	0	37.3075	977.2871	655.7347	3.9671	0.5248	381	1.865737869	0.004309854	3.65194352	0.00843599
6.565740563	×ÔÉí³µÁ¾	Road 1	9.444020653	18.26501255	0.000357453	2.179882288	0.78039217	0	37.3783	977.2871	655.7346	3.9684	0.5235	382	1.428424212	0.00329966	3.675682392	0.008490826
6.582423266	×ÔÉí³µÁ¾	Road 1	9.529150049	18.37027359	0.000357453	2.193880081	0.788235307	0	37.4496	977.2881	655.7346	3.9687	0.5232	383	1.441692104	0.003330309	3.699733714	0.008546385
6.599047687	×ÔÉí³µÁ¾	Road 1	9.614750512	18.53668556	0.000357453	2.209972858	0.796078444	0	37.5624	977.2881	655.7346	3.9708	0.5212	384	2.040528668	0.004713621	3.733656321	0.008624746
6.615813232	×ÔÉí³µÁ¾	Road 1	9.701575488	18.64358768	0.000357453	2.231843472	0.796078444	0	37.6347	977.2891	655.7346	3.9711	0.5208	385	1.469393134	0.003394298	3.758291498	0.008681653
6.632420059	×ÔÉí³µÁ¾	Road 1	9.788077209	18.7516983	0.000357453	2.255927324	0.796078444	0	37.7074	977.2891	655.7346	3.9724	0.5195	386	1.497763828	0.003459834	3.783164602	0.00873911
6.65014818	×ÔÉí³µÁ¾	Road 1	9.881072812	18.8843565	0.000357453	2.276197672	0.796078444	0	37.7963	977.29	655.7346	3.9731	0.5189	387	1.663788385	0.003843351	3.812660445	0.008807246
6.665740379	×ÔÉí³µÁ¾	Road 1	9.963579135	19.04944668	0.000357453	2.290817976	0.796078444	0	37.9069	977.291	655.7346	3.9741	0.5179	388	2.183657032	0.005044248	3.84670846	0.008885897
6.682419784	×ÔÉí³µÁ¾	Road 1	10.05235143	19.1601717	0.000357453	2.303388357	0.796078444	0	37.9812	977.291	655.7346	3.9755	0.5165	389	1.545049812	0.003569065	3.872478971	0.008945426
6.699277335	×ÔÉí³µÁ¾	Road 1	10.14285542	19.32750378	0.000357914	2.32259202	0.796078444	0	38.0935	977.292	655.7345	3.9765	0.5154	390	2.101105919	0.004853555	3.90789847	0.009027245
6.715660562	×ÔÉí³µÁ¾	Road 1	10.23132367	19.43974113	0.000357914	2.330402136	0.796078444	0	38.1689	977.293	655.7345	3.9769	0.515	391	1.598785851	0.003693195	3.934091742	0.009087752
6.732417676	×ÔÉí³µÁ¾	Road 1	10.32237234	19.56036243	0.000357914	2.336862326	0.796078444	0	38.2502	977.293	655.7345	3.9784	0.5136	392	1.665171776	0.003846547	3.961995216	0.009152209
6.749249568	×ÔÉí³µÁ¾	Road 1	10.41439309	19.68136997	0.000357914	2.345012426	0.796078444	0	38.3319	977.2939	655.7345	3.9789	0.5131	393	1.672096926	0.003862544	3.990139771	0.009217223
6.765746794	×ÔÉí³µÁ¾	Road 1	10.50510366	19.79472485	0.000357914	2.353402615	0.78039217	0	38.4087	977.2939	655.7345	3.9803	0.5117	394	1.62600989	0.003756083	4.016964423	0.009279188
6.782355453	×ÔÉí³µÁ¾	Road 1	10.59706374	19.93275261	0.000357914	2.356512547	0.78039217	0	38.5025	977.2949	655.7344	3.981	0.5109	395	1.881644588	0.004346599	4.048216017	0.009351379
6.799208605	×ÔÉí³µÁ¾	Road 1	10.69125094	20.11931591	0.000357914	2.350622416	0.772549033	0	38.6305	977.2959	655.7344	3.9824	0.5096	396	2.372296291	0.005480004	4.088196687	0.009443734
6.815672841	×ÔÉí³µÁ¾	Road 1	10.78378297	20.2326622	0.000357914	2.348322153	0.764705896	0	38.709	977.2959	655.7344	3.9838	0.5082	397	1.657730867	0.003829358	4.11548996	0.009506782
6.832435087	×ÔÉí³µÁ¾	Road 1	10.8787794	20.40222759	0.000357914	2.335341692	0.749019623	0	38.8275	977.2969	655.7344	3.985	0.507	398	2.234864559	0.005162537	4.15295131	0.009593318
6.849090299	×ÔÉí³µÁ¾	Road 1	10.97368796	20.51434822	0.000357914	2.315511227	0.733333349	0	38.9071	977.2979	655.7344	3.9854	0.5065	399	1.649749806	0.003810922	4.180428242	0.009656789
6.866592622	×ÔÉí³µÁ¾	Road 1	11.0740016	20.63320827	0.000357914	2.289650679	0.725490212	0	38.9928	977.2979	655.7344	3.987	0.505	400	1.667925358	0.003852908	4.20962081	0.009724224
6.882325579	×ÔÉí³µÁ¾	Road 1	11.16489182	20.7974144	0.000357914	2.257495642	0.717647076	0	39.1137	977.2988	655.7344	3.9882	0.5037	401	2.330216321	0.0053828	4.246282002	0.009808911
6.89960137	×ÔÉí³µÁ¾	Road 1	11.26521431	20.90560913	0.000357914	2.238142729	0.709803939	0	39.1948	977.2998	655.7343	3.9887	0.5033	402	1.591143807	0.003675542	4.273770271	0.009872409
6.91572251	×ÔÉí³µÁ¾	Road 1	11.35931138	21.01274986	0.000357914	2.215864658	0.701960802	0	39.2763	977.2998	655.7343	3.9902	0.5018	403	1.667209859	0.003851255	4.300647594	0.009934496
6.932384686	×ÔÉí³µÁ¾	Road 1	11.45729989	21.17122078	0.000357914	2.179883718	0.701960802	0	39.3994	977.3008	655.7343	3.9905	0.5005	404	2.198262762	0.005077987	4.337275435	0.010019106
6.949481965	×ÔÉí³µÁ¾	Road 1	11.55834229	21.27547073	0.000357914	2.160410643	0.701960802	0	39.4819	977.3018	655.7343	3.991	0.5	405	1.583820773	0.003658626	4.36435446	0.010081659
6.965698409	×ÔÉí³µÁ¾	Road 1	11.65487614	21.43021317	0.000357914	2.144020319	0.701960802	0	39.6065	977.3018	655.7343	3.9932	0.4977	406	2.227529977	0.005145594	4.400477075	0.010165102
6.982407504	×ÔÉí³µÁ¾	Road 1	11.7548504	21.53960781	0.000358838	2.118419647	0.701960802	0	39.696	977.3027	655.7343	3.9939	0.4971	407	1.68312749	0.003888025	4.428600614	0.010230067
6.999501484	×ÔÉí³µÁ¾	Road 1	11.85760816	21.64083138	0.000358838	2.101678371	0.694117665	0	39.78	977.3037	655.7343	3.9944	0.4965	408	1.573180824	0.003634048	4.455492534	0.010292188
7.015701799	×ÔÉí³µÁ¾	Road 1	11.95567048	21.79120159	0.000358838	2.079707861	0.694117665	0	39.9067	977.3037	655.7342	3.9967	0.4942	409	2.21142047	0.005108381	4.491318244	0.010374945
7.032332452	×ÔÉí³µÁ¾	Road 1	12.05679669	21.89056263	0.000359301	2.065984726	0.686274529	0	39.9917	977.3047	655.7342	3.9973	0.4937	410	1.597950704	0.003691266	4.517893207	0.010436333
7.049194768	×ÔÉí³µÁ¾	Road 1	12.15979354	21.98919067	0.000359301	2.050224304	0.678431392	0	40.077	977.3057	655.7342	3.9978	0.4931	411	1.580024111	0.003649856	4.544536073	0.010497878
7.065724617	×ÔÉí³µÁ¾	Road 1	12.26120844	22.08692951	0.000359301	2.031490088	0.678431392	0	40.1627	977.3057	655.7341	3.9994	0.4915	412	1.597907186	0.003691166	4.570949238	0.010558893
7.082336209	×ÔÉí³µÁ¾	Road 1	12.36363517	22.19752579	0.000359301	2.012059927	0.678431392	0	40.2611	977.3066	655.7341	4.0002	0.4907	413	1.746630292	0.004034716	4.599963547	0.010625916
7.099358343	×ÔÉí³µÁ¾	Road 1	12.46933729	22.35487232	0.000359301	1.991649389	0.678431392	0	40.4035	977.3076	655.7341	4.0018	0.4891	414	2.253368295	0.005205281	4.638320685	0.010714521
7.115747435	×ÔÉí³µÁ¾	Road 1	12.57154081	22.44985085	0.000360227	1.979989052	0.678431392	0	40.4906	977.3076	655.7341	4.0034	0.4875	415	1.596569871	0.003688076	4.664487016	0.010774965
7.132321272	×ÔÉí³µÁ¾	Road 1	12.67533073	22.54418907	0.000360227	1.96678865	0.678431392	0	40.5781	977.3086	655.7341	4.004	0.4869	416	1.581974295	0.003654361	4.690706399	0.010835532
7.149279259	×ÔÉí³µÁ¾	Road 1	12.78221884	22.69120846	0.000360227	1.949858189	0.678431392	0	40.7163	977.3096	655.7341	4.0055	0.4854	417	2.171065864	0.005015162	4.727523306	0.010920579
7.16570354	×ÔÉí³µÁ¾	Road 1	12.8861671	22.78417511	0.000360227	1.942107916	0.678431392	0	40.8048	977.3105	655.734	4.0061	0.4847	418	1.589454604	0.00367164	4.753628956	0.010980883
7.182369382	×ÔÉí³µÁ¾	Road 1	12.99207268	22.87673836	0.000360227	1.933707714	0.678431392	0	40.8936	977.3105	655.734	4.0077	0.4831	419	1.573749492	0.003635361	4.779856816	0.011041469
7.199326636	×ÔÉí³µÁ¾	Road 1	13.10051073	23.02123775	0.000360227	1.9185673	0.678431392	0	41.0338	977.3115	655.734	4.0093	0.4816	420	2.169055493	0.005010518	4.816638041	0.011126434
7.215672841	×ÔÉí³µÁ¾	Road 1	13.20545612	23.11260624	0.000360691	1.91041708	0.678431392	0	41.1235	977.3125	655.734	4.0099	0.4809	421	1.59401345	0.003682171	4.842694111	0.011186623
7.232382303	×ÔÉí³µÁ¾	Road 1	13.31315622	23.2036417	0.000360691	1.904906869	0.670588255	0	41.2136	977.3125	655.7339	4.0115	0.4793	422	1.570819244	0.003628592	4.868941656	0.011247255
7.249681921	×ÔÉí³µÁ¾	Road 1	13.42525119	23.32663708	0.000360691	1.896576643	0.670588255	0	41.3105	977.3135	655.7339	4.0123	0.4785	423	1.910885972	0.004414147	4.901999253	0.011323618
7.265845947	×ÔÉí³µÁ¾	Road 1	13.53044999	23.42953777	0.000360691	1.882459044	0.670588255	0	41.4403	977.3145	655.7339	4.0137	0.4771	424	1.768377173	0.004084951	4.930583348	0.011389648
7.282357103	×ÔÉí³µÁ¾	Road 1	13.63855239	23.57004261	0.000360691	1.870085955	0.670588255	0	41.584	977.3154	655.7339	4.0153	0.4755	425	2.211509902	0.005108588	4.967097931	0.011473996
7.315717378	×ÔÉí³µÁ¾	Road 1	13.8586133	23.74738426	0.000360691	1.848028183	0.670588255	0	41.768	977.3164	655.7339	4.0176	0.4731	426	1.571591069	0.003630375	5.019526642	0.011595107
7.33230551	×ÔÉí³µÁ¾	Road 1	13.96844045	23.83497791	0.000361619	1.831217766	0.670588255	0	41.8605	977.3174	655.7338	4.0183	0.4724	427	1.571068989	0.003629169	5.045587742	0.011655308
7.349589365	×ÔÉí³µÁ¾	Road 1	14.08355581	23.97701569	0.000361619	1.811907887	0.670588255	0	42.0133	977.3184	655.7338	4.0201	0.4706	428	2.18427451	0.005045674	5.083340427	0.011742516
7.365660653	×ÔÉí³µÁ¾	Road 1	14.19097709	24.06257858	0.000361619	1.793583989	0.670588255	0	42.1067	977.3184	655.7338	4.0218	0.4689	429	1.592293027	0.003678197	5.108930626	0.01180163
7.382348855	×ÔÉí³µÁ¾	Road 1	14.30291622	24.14764881	0.000361619	1.784963727	0.670588255	0	42.2004	977.3193	655.7338	4.0225	0.4682	430	1.549731283	0.003579879	5.134792855	0.011861371
7.399317472	×ÔÉí³µÁ¾	Road 1	14.41719183	24.2442976	0.000361619	1.774376273	0.670588255	0	42.308	977.3203	655.7338	4.0235	0.4672	431	1.679551166	0.003879763	5.163292516	0.011927206
7.415702899	×ÔÉí³µÁ¾	Road 1	14.52816811	24.38231506	0.000361619	1.763283134	0.670588255	0	42.4633	977.3213	655.7338	4.0253	0.4654	432	2.259477497	0.005219393	5.200315018	0.012012728
7.432371673	×ÔÉí³µÁ¾	Road 1	14.64147833	24.471912	0.000361619	1.758712888	0.670588255	0	42.5651	977.3213	655.7337	4.0272	0.4635	433	1.625020431	0.003753797	5.227402117	0.012075299
7.449124389	×ÔÉí³µÁ¾	Road 1	14.7557473	24.55531883	0.000361619	1.754072785	0.670588255	0	42.6605	977.3223	655.7337	4.0279	0.4628	434	1.545704851	0.003570578	5.253296871	0.012135116
7.465704457	×ÔÉí³µÁ¾	Road 1	14.86941293	24.68001194	0.000361619	1.748575449	0.670588255	0	42.8041	977.3232	655.7336	4.0295	0.4611	435	2.091941095	0.004832384	5.287981396	0.012215237
7.482381295	×ÔÉí³µÁ¾	Road 1	14.98412597	24.76290379	0.000361619	1.744985342	0.670588255	0	42.9002	977.3242	655.7336	4.0303	0.4604	436	1.554504184	0.003590905	5.313905612	0.012275122
7.499323521	×ÔÉí³µÁ¾	Road 1	15.10105393	24.84565315	0.000361619	1.742712379	0.670588255	0	42.9967	977.3242	655.7336	4.032	0.4586	437	1.540213027	0.003557892	5.340000248	0.012335401
7.515646266	×ÔÉí³µÁ¾	Road 1	15.21429504	24.9754549	0.000361619	1.738662243	0.670588255	0	43.149	977.3252	655.7336	4.0338	0.4568	438	2.206174661	0.005096263	5.376011075	0.012418586
7.532317606	×ÔÉí³µÁ¾	Road 1	15.33033637	25.05790043	0.000361619	1.736322165	0.670588255	0	43.2463	977.3262	655.7336	4.0346	0.456	439	1.564046239	0.003612947	5.402085822	0.012478818
7.549623822	×ÔÉí³µÁ¾	Road 1	15.45119256	25.14023266	0.000361619	1.733904958	0.670588255	0	43.3439	977.3271	655.7336	4.0354	0.4552	440	1.527436919	0.003528379	5.428519974	0.012539881
7.56563756	×ÔÉí³µÁ¾	Road 1	15.56344086	25.23420181	0.000361619	1.732411861	0.670588255	0	43.4558	977.3271	655.7335	4.0374	0.4532	441	1.773545081	0.004096889	5.456921062	0.012605488
7.582381845	×ÔÉí³µÁ¾	Road 1	15.68135578	25.35155811	0.000361619	1.731081843	0.670588255	0	43.5682	977.3281	655.7335	4.0385	0.4521	442	2.029151775	0.004687341	5.490897757	0.012683974
7.599681829	×ÔÉí³µÁ¾	Road 1	15.80366275	25.45118351	0.000361619	1.728831649	0.670588255	0	43.7163	977.3291	655.7335	4.0402	0.4504	443	1.762091795	0.004070432	5.521381917	0.012754392
7.615702899	×ÔÉí³µÁ¾	Road 1	15.91729267	25.5331089	0.000361619	1.726451635	0.670588255	0	43.8155	977.3301	655.7335	4.041	0.4496	444	1.625130394	0.003754051	5.547418244	0.012814536
7.632368008	×ÔÉí³µÁ¾	Road 1	16.03608586	25.66172791	0.000361619	1.725511551	0.670588255	0	43.9719	977.3311	655.7335	4.0428	0.4477	445	2.206876807	0.005097885	5.584196086	0.012899493
7.649071605	×ÔÉí³µÁ¾	Road 1	16.15553296	25.7435297	0.000361619	1.724491477	0.670588255	0	44.0719	977.3311	655.7334	4.0446	0.4459	446	1.588013279	0.003668311	5.610721621	0.012960767
7.665702991	×ÔÉí³µÁ¾	Road 1	16.27484125	25.8252594	0.000361619	1.723061323	0.670588255	0	44.1722	977.332	655.7334	4.0455	0.4451	447	1.595881538	0.003686486	5.637263342	0.013022078
7.682306518	×ÔÉí³µÁ¾	Road 1	16.39435318	25.91274319	0.000361619	1.721031308	0.670588255	0	44.28	977.333	655.7334	4.0464	0.4441	448	1.679474686	0.003879587	5.665148546	0.013086493
7.699302627	×ÔÉí³µÁ¾	Road 1	16.51715855	26.01179695	0.000361619	1.719621181	0.670588255	0	44.4026	977.334	655.7334	4.0477	0.4428	449	1.809920749	0.004180917	5.695910156	0.013157552
7.715729841	×ÔÉí³µÁ¾	Road 1	16.63643796	26.13990955	0.000361619	1.718644142	0.670588255	0	44.5619	977.335	655.7333	4.0496	0.4409	450	2.260746297	0.005222324	5.733047919	0.013243341
7.732396049	×ÔÉí³µÁ¾	Road 1	16.75782984	26.22136631	0.000361619	1.717784047	0.670588255	0	44.6638	977.335	655.7333	4.0514	0.4391	451	1.609761691	0.00371855	5.759876543	0.013305315
7.749320313	×ÔÉí³µÁ¾	Road 1	16.88151117	26.30854626	0.000361619	1.715900898	0.670588255	0	44.7732	977.3359	655.7333	4.0524	0.4381	452	1.673842772	0.003866577	5.7882051	0.013370754
7.765658454	×ÔÉí³µÁ¾	Road 1	17.001489	26.43631382	0.000361619	1.714560866	0.670588255	0	44.9344	977.3369	655.7333	4.0543	0.4361	453	2.287917176	0.005285089	5.825585413	0.013457102
7.782336026	×ÔÉí³µÁ¾	Road 1	17.12433596	26.51759205	0.000361619	1.714083791	0.670588255	0	45.0374	977.3379	655.7333	4.0552	0.4352	454	1.621370078	0.003745365	5.852625928	0.013519566
7.799351562	×ÔÉí³µÁ¾	Road 1	17.2500562	26.59880161	0.000361619	1.712633729	0.670588255	0	45.1406	977.3379	655.7332	4.0561	0.4333	455	1.602280585	0.003701268	5.879889592	0.013582545
7.815651581	×ÔÉí³µÁ¾	Road 1	17.37088337	26.68572407	0.000360227	1.710853696	0.670588255	0	45.2517	977.3389	655.7332	4.0572	0.4323	456	1.735356695	0.004008674	5.908175939	0.013647886
7.832356644	×ÔÉí³µÁ¾	Road 1	17.49535782	26.82468224	0.000357914	1.709413528	0.670588255	0	45.43	977.3398	655.7332	4.0594	0.43	457	2.43198156	0.005617877	5.948802345	0.013741733
7.849117058	×ÔÉí³µÁ¾	Road 1	17.62064893	26.91150856	0.000356072	1.709160447	0.670588255	0	45.542	977.3408	655.7332	4.0604	0.429	458	1.712175916	0.003955126	5.977499121	0.013808023
7.865675132	×ÔÉí³µÁ¾	Road 1	17.74482654	26.99827137	0.000353319	1.707970381	0.670588255	0	45.6543	977.3418	655.7332	4.0615	0.4279	459	1.730589357	0.003997661	6.006154349	0.013874217
7.882367733	×ÔÉí³µÁ¾	Road 1	17.87054875	27.11380634	0.000349217	1.706076741	0.670588255	0	45.8047	977.3428	655.7332	4.0632	0.4262	460	2.129213736	0.004918484	6.041696463	0.013956319
7.899053369	×ÔÉí³µÁ¾	Road 1	17.9965931	27.19462795	0.000344246	1.705464244	0.670588255	0	45.9103	977.3428	655.7331	4.0651	0.4242	461	1.648185451	0.003807308	6.069197485	0.014019846
7.915624639	×ÔÉí³µÁ¾	Road 1	18.12214545	27.27542553	0.000338433	1.705450654	0.670588255	0	46.0162	977.3438	655.7331	4.0661	0.4233	462	1.659723225	0.003833961	6.096701208	0.01408338
7.932355728	×ÔÉí³µÁ¾	Road 1	18.24949833	27.40230389	0.000332247	1.703023911	0.662745118	0	46.1833	977.3447	655.733	4.0681	0.4212	463	2.304794137	0.005324074	6.135262923	0.014172457
7.94904393	×ÔÉí³µÁ¾	Road 1	18.37692496	27.48863411	0.000327439	1.698703885	0.662745118	0	46.2976	977.3457	655.733	4.0692	0.4201	464	1.740779113	0.0040212	6.164313397	0.014239564
7.965684113	×ÔÉí³µÁ¾	Road 1	18.50438283	27.57471714	0.000320529	1.694757104	0.662745118	0	46.4124	977.3467	655.733	4.0703	0.419	465	1.745319983	0.004031689	6.193355841	0.014306652
7.982351054	×ÔÉí³µÁ¾	Road 1	18.63260207	27.69489899	0.000312451	1.689626932	0.662745118	0	46.5736	977.3477	655.733	4.0722	0.4171	466	2.237481242	0.005168582	6.23064781	0.014392796
7.999814889	×ÔÉí³µÁ¾	Road 1	18.76733952	27.77481766	0.000303681	1.686936855	0.662745118	0	46.6814	977.3477	655.733	4.0742	0.4151	467	1.612877304	0.003725747	6.258814832	0.014457862
8.015695934	×ÔÉí³µÁ¾	Road 1	18.89021718	27.85456123	0.000293457	1.683156729	0.662745118	0	46.7896	977.3486	655.7329	4.0752	0.4141	468	1.723637116	0.003981602	6.286187991	0.014521094
8.032362143	×ÔÉí³µÁ¾	Road 1	19.01953847	27.93416748	0.000283465	1.681467056	0.662745118	0	46.8981	977.3496	655.7329	4.0762	0.4131	469	1.668701817	0.003854701	6.313998924	0.014585338
8.049039715	×ÔÉí³µÁ¾	Road 1	19.14957924	28.07043915	0.000272546	1.678160191	0.662745118	0	47.0848	977.3506	655.7329	4.0786	0.4107	470	2.495657343	0.005764968	6.355620428	0.014681483
8.065641043	×ÔÉí³µÁ¾	Road 1	19.27939152	28.14981022	0.000260789	1.676386833	0.662745118	0	47.1941	977.3516	655.7328	4.0796	0.4097	471	1.68037875	0.003881675	6.383516947	0.014745924
8.082394125	×ÔÉí³µÁ¾	Road 1	19.41078556	28.23471565	0.000249012	1.673976779	0.662745118	0	47.3038	977.3525	655.7328	4.0806	0.4087	472	1.754366668	0.004052587	6.412907996	0.014813817
8.099035774	×ÔÉí³µÁ¾	Road 1	19.54185446	28.35344353	0.000236543	1.672836661	0.662745118	0	47.4767	977.3535	655.7328	4.0827	0.4065	473	2.265002477	0.005232156	6.450601373	0.014900889
8.115711146	×ÔÉí³µÁ¾	Road 1	19.6735554	28.43255024	0.000222138	1.671136498	0.662745118	0	47.5871	977.3535	655.7328	4.0847	0.4045	474	1.685166368	0.003892734	6.478702149	0.014965802
8.132377721	×ÔÉí³µÁ¾	Road 1	19.80555271	28.51157627	0.000209944	1.669706464	0.662745118	0	47.6978	977.3545	655.7328	4.0857	0.4035	475	1.688447502	0.003900314	6.506842786	0.015030807
8.149067756	×ÔÉí³µÁ¾	Road 1	19.93831066	28.63556728	0.000197271	1.667325854	0.662745118	0	47.8725	977.3555	655.7327	4.0879	0.4013	476	2.357190691	0.00544511	6.54618438	0.015121686
8.165706106	×ÔÉí³µÁ¾	Road 1	20.07102194	28.71442337	0.000183932	1.666465759	0.662745118	0	47.984	977.3564	655.7327	4.0889	0.4002	477	1.697802806	0.003921924	6.574433018	0.01518694
8.182326495	×ÔÉí³µÁ¾	Road 1	20.20395389	28.79325027	0.000171774	1.666650176	0.662745118	0	48.0958	977.3574	655.7327	4.09	0.3992	478	1.702481494	0.003932732	6.602728923	0.015252304
8.199576628	×ÔÉí³µÁ¾	Road 1	20.34248867	28.9113842	0.000160434	1.664153218	0.662745118	0	48.2641	977.3584	655.7327	4.0921	0.3971	479	2.232426135	0.005156904	6.641238569	0.015341261
8.215710963	×ÔÉí³µÁ¾	Road 1	20.472415	28.99002571	0.000147549	1.662343264	0.654901981	0	48.3767	977.3584	655.7327	4.0941	0.395	480	1.744953044	0.004030842	6.669392227	0.015406296
8.23333425	×ÔÉí³µÁ¾	Road 1	20.61490808	29.10779915	0.000136099	1.658316255	0.654901981	0	48.5462	977.3604	655.7326	4.0952	0.3939	481	2.204051661	0.005091359	6.708234861	0.015496023
8.265737447	×ÔÉí³µÁ¾	Road 1	20.87796067	29.2251812	0.000125258	1.652372837	0.654901981	0	48.7163	977.3613	655.7326	4.0973	0.3918	482	1.440391563	0.003327305	6.754908153	0.015603838
8.282312749	×ÔÉí³µÁ¾	Road 1	21.01323823	29.3810154	0.000114144	1.645352602	0.654901981	0	48.9443	977.3623	655.7325	4.1004	0.3886	483	2.909346173	0.00672059	6.803131446	0.015715234
8.299023311	×ÔÉí³µÁ¾	Road 1	21.14998027	29.4586956	9.51E-05	1.643049359	0.654901981	0	49.0587	977.3633	655.7325	4.1015	0.3875	484	1.711001809	0.003952414	6.831723247	0.015781281
8.315614742	×ÔÉí³µÁ¾	Road 1	21.28610504	29.53627968	8.71E-05	1.641319275	0.654901981	0	49.1734	977.3643	655.7325	4.1026	0.3864	485	1.721755548	0.003977255	6.860289636	0.015847269
8.332305876	×ÔÉí³µÁ¾	Road 1	21.42361211	29.65798759	8.04E-05	1.637149215	0.647058845	0	49.3543	977.3652	655.7325	4.1049	0.3841	486	2.395745443	0.005534172	6.900277345	0.015939641
8.348994811	×ÔÉí³µÁ¾	Road 1	21.56148464	29.74073181	7.54E-05	1.633135796	0.647058845	0	49.4781	977.3662	655.7324	4.1062	0.3828	487	1.803850044	0.004166894	6.930381681	0.016009182
8.365740929	×ÔÉí³µÁ¾	Road 1	21.70018777	29.81773224	7.09E-05	1.628535748	0.647058845	0	49.5939	977.3662	655.7324	4.1083	0.3807	488	1.715244701	0.003962215	6.95910537	0.016075533
8.382348122	×ÔÉí³µÁ¾	Road 1	21.83827108	29.93280716	6.72E-05	1.622185588	0.647058845	0	49.7682	977.3682	655.7324	4.1095	0.3795	489	2.321806472	0.005363373	6.997664058	0.016164604
8.399127596	×ÔÉí³µÁ¾	Road 1	21.97814336	30.00929604	6.44E-05	1.619322181	0.647058845	0	49.8847	977.3682	655.7324	4.1116	0.3774	490	1.714093047	0.003959555	7.026425639	0.016231043
8.415613826	×ÔÉí³µÁ¾	Road 1	22.1159207	30.08562012	6.12E-05	1.616002202	0.647058845	0	50.0016	977.3691	655.7324	4.1128	0.3763	491	1.736155761	0.00401052	7.055048301	0.016297162
8.432352979	×ÔÉí³µÁ¾	Road 1	22.25636803	30.20525436	5.91E-05	1.613078952	0.647058845	0	50.1858	977.3701	655.7323	4.1151	0.3739	492	2.396831015	0.00553668	7.095169222	0.016389841
8.44931903	×ÔÉí³µÁ¾	Road 1	22.39907732	30.28126259	5.73E-05	1.610508919	0.647058845	0	50.3034	977.3711	655.7323	4.1163	0.3728	493	1.70642526	0.003941842	7.124120521	0.016456718
8.465679898	×ÔÉí³µÁ¾	Road 1	22.53704107	30.35716095	5.57E-05	1.608118773	0.647058845	0	50.4214	977.3721	655.7323	4.1175	0.3716	494	1.751616972	0.004046235	7.152778493	0.016522918
8.482270962	×ÔÉí³µÁ¾	Road 1	22.67732024	30.43837395	5.45E-05	1.606725574	0.647058845	0	50.548	977.373	655.7322	4.1188	0.3703	495	1.822639362	0.004210297	7.183018021	0.016592772
8.498980424	×ÔÉí³µÁ¾	Road 1	22.8190272	30.53030891	5.37E-05	1.604485512	0.647058845	0	50.692	977.374	655.7322	4.1204	0.3686	496	1.986924161	0.004589795	7.216218455	0.016669465
8.515623906	×ÔÉí³µÁ¾	Road 1	22.96072385	30.64911232	5.36E-05	1.602305532	0.647058845	0	50.8789	977.375	655.7322	4.1229	0.3662	497	2.425387155	0.005602644	7.256585342	0.016762712
8.53232787	×ÔÉí³µÁ¾	Road 1	23.1032858	30.72462616	5.36E-05	1.600815415	0.647058845	0	50.9983	977.376	655.7322	4.124	0.365	498	1.737840767	0.004014412	7.285614171	0.016829769
8.548946793	×ÔÉí³µÁ¾	Road 1	23.24547039	30.80010223	5.36E-05	1.600402355	0.647058845	0	51.1179	977.376	655.7321	4.1262	0.3628	499	1.746922971	0.004035392	7.314646149	0.016896833
8.565603837	×ÔÉí³µÁ¾	Road 1	23.3885294	30.91859665	5.36E-05	1.59793222	0.647058845	0	51.3065	977.3779	655.7321	4.1277	0.3613	500	2.437619463	0.005630901	7.355249685	0.016990627
8.582389543	×ÔÉí³µÁ¾	Road 1	23.53304458	30.99390793	5.36E-05	1.597112298	0.647058845	0	51.4269	977.3779	655.7321	4.1299	0.3591	501	1.741341649	0.004022499	7.384479334	0.017058147
8.598960813	×ÔÉí³µÁ¾	Road 1	23.67625808	31.11219635	5.37E-05	1.596815586	0.647058845	0	51.6167	977.3799	655.7321	4.1314	0.3576	502	2.457578974	0.005677007	7.425204539	0.017152222
8.615691536	×ÔÉí³µÁ¾	Road 1	23.82119914	31.18740463	5.44E-05	1.594932199	0.647058845	0	51.7378	977.3799	655.7321	4.1336	0.3554	503	1.752663153	0.004048652	7.45452786	0.017219959
8.632410895	×ÔÉí³µÁ¾	Road 1	23.96641573	31.26792755	5.49E-05	1.594285488	0.647058845	0	51.868	977.3809	655.732	4.135	0.354	504	1.842922858	0.004257152	7.485340349	0.017291136
8.649027985	×ÔÉí³µÁ¾	Road 1	24.11126413	31.38059921	5.53E-05	1.593215466	0.647058845	0	52.0507	977.3818	655.7319	4.1373	0.3517	505	2.379568059	0.005496802	7.524881846	0.017382477
8.665640309	×ÔÉí³µÁ¾	Road 1	24.2564174	31.45567017	5.61E-05	1.592582226	0.647058845	0	52.1729	977.3828	655.7319	4.1386	0.3505	506	1.77162802	0.004092461	7.554312706	0.017450462
8.683064556	×ÔÉí³µÁ¾	Road 1	24.40907993	31.54139786	5.71E-05	1.591085434	0.647058845	0	52.3129	977.3838	655.7319	4.1401	0.3489	507	1.884599209	0.004353424	7.587150427	0.017526317
8.699088925	×ÔÉí³µÁ¾	Road 1	24.5498111	31.61635895	5.79E-05	1.590632081	0.647058845	0	52.4357	977.3848	655.7319	4.1414	0.3477	508	1.822533962	0.004210053	7.616355383	0.017593781
8.715612543	×ÔÉí³µÁ¾	Road 1	24.69544278	31.72876968	5.91E-05	1.590762138	0.647058845	0	52.6205	977.3857	655.7319	4.1438	0.3454	509	2.408861697	0.005564471	7.656158494	0.017685726
8.734358591	×ÔÉí³µÁ¾	Road 1	24.86105187	31.80364838	6.01E-05	1.588465333	0.647058845	0	52.744	977.3867	655.7318	4.145	0.3441	510	1.643907917	0.003797427	7.686975271	0.017756913
8.749825428	×ÔÉí³µÁ¾	Road 1	24.9981735	31.91589088	6.12E-05	1.58818531	0.647058845	0	52.9299	977.3877	655.7318	4.1474	0.3418	511	2.54630845	0.005881973	7.726358608	0.017847888
8.76686589	×ÔÉí³µÁ¾	Road 1	25.14960018	31.99068375	6.28E-05	1.587105274	0.647058845	0	53.0541	977.3887	655.7318	4.1487	0.3405	512	1.760829615	0.004067516	7.756363958	0.017917201
8.78231	×ÔÉí³µÁ¾	Road 1	25.28716197	32.06545601	6.35E-05	1.587262034	0.647058845	0	53.1787	977.3896	655.7318	4.15	0.3393	513	1.889449269	0.004364628	7.785544821	0.017984609
8.799029359	×ÔÉí³µÁ¾	Road 1	25.4366276	32.18282776	6.50E-05	1.585731983	0.647058845	0	53.375	977.3906	655.7317	4.1526	0.3367	514	2.49920619	0.005773166	7.827329947	0.018081132
8.815616392	×ÔÉí³µÁ¾	Road 1	25.58525429	32.25749359	6.60E-05	1.585075259	0.647058845	0	53.5003	977.3916	655.7317	4.1539	0.3355	515	1.804303891	0.004167942	7.857257994	0.018150266
8.832314491	×ÔÉí³µÁ¾	Road 1	25.73522236	32.33212852	6.79E-05	1.584782004	0.647058845	0	53.6259	977.3926	655.7317	4.1552	0.3342	516	1.798915631	0.004155495	7.887296465	0.018219655
8.849117424	×ÔÉí³µÁ¾	Road 1	25.88667907	32.44934235	6.95E-05	1.583505154	0.647058845	0	53.8239	977.3936	655.7316	4.1578	0.3316	517	2.505047846	0.005786661	7.929388619	0.018316888
8.932369657	×ÔÉí³µÁ¾	Road 1	26.64656141	32.85889549	7.14E-05	1.579501867	0.647058845	0	54.5224	977.3975	655.7315	4.1666	0.323	518	1.94381179	0.004490205	8.09121529	0.018690707
8.949485264	×ÔÉí³µÁ¾	Road 1	26.80333907	32.97572823	7.30E-05	1.578561783	0.647058845	0	54.7235	977.3994	655.7315	4.1683	0.3214	519	2.498300844	0.005771075	8.133975224	0.018789483
8.965581477	×ÔÉí³µÁ¾	Road 1	26.95111139	33.05003014	7.74E-05	1.578295112	0.647058845	0	54.8519	977.4004	655.7314	4.1697	0.3201	520	1.874016067	0.004328977	8.164139787	0.018859163
8.982262348	×ÔÉí³µÁ¾	Road 1	27.10459529	33.12429085	7.77E-05	1.577205062	0.647058845	0	54.9806	977.4004	655.7314	4.172	0.3178	521	1.830587958	0.004228658	8.194675588	0.018929701
8.99897291	×ÔÉí³µÁ¾	Road 1	27.25889376	33.24092445	7.77E-05	1.576515079	0.647058845	0	55.1834	977.4023	655.7314	4.1737	0.316	522	2.56004325	0.0059137	8.237455349	0.019028522
9.015602096	×ÔÉí³µÁ¾	Road 1	27.41278352	33.3151062	7.77E-05	1.575425029	0.647058845	0	55.3128	977.4033	655.7314	4.1751	0.3147	523	1.842028405	0.004255086	8.268086782	0.01909928
9.03233795	×ÔÉí³µÁ¾	Road 1	27.56800506	33.38924675	7.77E-05	1.574944973	0.647058845	0	55.4425	977.4033	655.7313	4.1775	0.3123	524	1.83655953	0.004242453	8.298823175	0.019170282
9.049262581	×ÔÉí³µÁ¾	Road 1	27.72554997	33.51102333	7.77E-05	1.574651718	0.647058845	0	55.6563	977.4053	655.7313	4.1794	0.3103	525	2.640603649	0.006099794	8.343514416	0.019273518
9.065645808	×ÔÉí³µÁ¾	Road 1	27.8783922	33.58508148	7.77E-05	1.573091626	0.647058845	0	55.7867	977.4063	655.7313	4.1808	0.3089	526	1.871767763	0.004323784	8.374180012	0.019344356
9.082284525	×ÔÉí³µÁ¾	Road 1	28.03398443	33.66437531	7.77E-05	1.572871685	0.647058845	0	55.9269	977.4072	655.7313	4.1824	0.3074	527	1.94664768	0.004496756	8.406569732	0.019419176
9.09918203	×ÔÉí³µÁ¾	Road 1	28.19251764	33.77537498	7.77E-05	1.572371602	0.647058845	0	56.1236	977.4082	655.7312	4.185	0.3047	528	2.476944956	0.005721743	8.448423922	0.019515859
9.115658729	×ÔÉí³µÁ¾	Road 1	28.34744128	33.84932327	7.77E-05	1.571481586	0.647058845	0	56.2551	977.4092	655.7312	4.1864	0.3033	529	1.874706044	0.004330571	8.47931289	0.019587213
9.132267021	×ÔÉí³µÁ¾	Road 1	28.50394326	33.92324066	7.79E-05	1.570394874	0.647058845	0	56.3869	977.4102	655.7312	4.1879	0.3019	530	1.86718997	0.004313209	8.510323727	0.019658848
9.149240771	×ÔÉí³µÁ¾	Road 1	28.66441155	34.03407555	7.79E-05	1.570114851	0.647058845	0	56.5851	977.4111	655.7311	4.1905	0.2993	531	2.482132512	0.005733726	8.552454821	0.019756171
9.165576712	×ÔÉí³µÁ¾	Road 1	28.8191851	34.1079071	7.79E-05	1.568984866	0.647058845	0	56.7176	977.4121	655.7311	4.1919	0.2978	532	1.896031222	0.004379832	8.583428276	0.019827719
9.182380379	×ÔÉí³µÁ¾	Road 1	28.97873446	34.18168716	7.79E-05	1.568321586	0.647058845	0	56.8504	977.4131	655.7311	4.1934	0.2964	533	1.861462204	0.004299978	8.614707667	0.019899975
9.199488288	×ÔÉí³µÁ¾	Road 1	29.14152321	34.25547409	7.79E-05	1.568274856	0.647058845	0	56.9835	977.4131	655.7311	4.1958	0.2939	534	1.841864054	0.004254706	8.646218109	0.019972764
9.215599164	×ÔÉí³µÁ¾	Road 1	29.29534336	34.37134895	7.79E-05	1.566934824	0.647058845	0	57.1932	977.415	655.731	4.1977	0.2921	535	2.700117332	0.006237271	8.689719364	0.020073252
9.232267571	×ÔÉí³µÁ¾	Road 1	29.45485218	34.45030632	7.79E-05	1.566844821	0.647058845	0	57.3365	977.416	655.731	4.1993	0.2904	536	1.976608437	0.004565965	8.72266628	0.020149359
9.249423865	×ÔÉí³µÁ¾	Road 1	29.61940605	34.52924652	7.79E-05	1.566351414	0.647058845	0	57.4803	977.417	655.731	4.201	0.2888	537	1.940005018	0.004481412	8.755949577	0.020226244
9.26564984	×ÔÉí³µÁ¾	Road 1	29.7755819	34.65018883	7.79E-05	1.564781427	0.647058845	0	57.7013	977.418	655.731	4.204	0.2857	538	2.797564615	0.006462374	8.801342789	0.020331102
9.282290023	×ÔÉí³µÁ¾	Road 1	29.93608462	34.72376289	7.79E-05	1.56433475	0.647058845	0	57.8362	977.4189	655.7309	4.2055	0.2842	539	1.895471129	0.004378538	8.832883775	0.020403962
9.300167333	×ÔÉí³µÁ¾	Road 1	30.10906788	34.83408623	7.82E-05	1.563221335	0.647058845	0	58.0391	977.4199	655.7308	4.2082	0.2815	540	2.425720201	0.005603414	8.876249127	0.020504135
9.315620974	×ÔÉí³µÁ¾	Road 1	30.25891492	34.9075882	7.82E-05	1.562704682	0.647058845	0	58.1747	977.4209	655.7308	4.2097	0.28	541	2.004824761	0.004631145	8.907230969	0.020575704
9.348955223	×ÔÉí³µÁ¾	Road 1	30.58357597	35.06243019	7.82E-05	1.593293786	0.647058845	0	58.4565	977.4229	655.7308	4.2129	0.2768	542	1.977115121	0.004567136	8.973136618	0.020727946
9.365569747	×ÔÉí³µÁ¾	Road 1	30.74590524	35.17316208	7.82E-05	1.556244969	0.647058845	0	58.6614	977.4238	655.7307	4.2157	0.2741	543	2.596239228	0.005997313	9.016271897	0.020827588
9.382297537	×ÔÉí³µÁ¾	Road 1	30.90968069	35.24623489	7.82E-05	1.555128336	0.647058845	0	58.7983	977.4248	655.7307	4.2172	0.2726	544	1.903344321	0.004396725	9.048110641	0.020901136
9.398942852	×ÔÉí³µÁ¾	Road 1	31.07298691	35.31939354	7.82E-05	1.557005167	0.647058845	0	58.9355	977.4258	655.7307	4.2187	0.271	545	1.91484551	0.004423293	9.079983847	0.020974763
9.415646449	×ÔÉí³µÁ¾	Road 1	31.23739807	35.43429337	7.82E-05	1.555547237	0.647058845	0	59.1517	977.4277	655.7307	4.2206	0.269	546	2.678610668	0.006187591	9.124726281	0.021078118
9.432303127	×ÔÉí³µÁ¾	Road 1	31.40168481	35.50721512	7.82E-05	1.550028324	0.647058845	0	59.2897	977.4287	655.7307	4.2222	0.2675	547	1.91816611	0.004430964	9.156676556	0.021151923
9.448980699	×ÔÉí³µÁ¾	Road 1	31.56651476	35.57998924	7.82E-05	1.548832059	0.647058845	0	59.4279	977.4297	655.7306	4.2237	0.2659	548	1.917084523	0.004428465	9.188648871	0.021225779
9.465558934	×ÔÉí³µÁ¾	Road 1	31.73088911	35.69425049	7.82E-05	1.547297001	0.647058845	0	59.6457	977.4307	655.7306	4.2266	0.263	549	2.700261646	0.006237604	9.233414443	0.021329187
9.48227646	×ÔÉí³µÁ¾	Road 1	31.89698177	35.76687012	7.82E-05	1.544716001	0.647058845	0	59.7847	977.4316	655.7305	4.2282	0.2614	550	1.919514355	0.004434078	9.265503975	0.021403314
9.498914077	×ÔÉí³µÁ¾	Road 1	32.06261561	35.83937645	7.82E-05	1.542624116	0.647058845	0	59.9239	977.4326	655.7305	4.2297	0.2598	551	1.927150718	0.004451718	9.29756717	0.02147738
9.515564891	×ÔÉí³µÁ¾	Road 1	32.22885921	35.94280586	7.82E-05	1.541019678	0.647058845	0	60.0734	977.4336	655.7305	4.2314	0.2581	552	2.506229419	0.00578939	9.339297928	0.021573778
9.532238064	×ÔÉí³µÁ¾	Road 1	32.39570939	36.02557411	7.82E-05	1.542532921	0.647058845	0	60.2832	977.4355	655.7305	4.2342	0.2562	553	2.123925074	0.004906267	9.374710498	0.021655581
9.548984914	×ÔÉí³µÁ¾	Road 1	32.56380203	36.1341671	7.74E-05	1.541187286	0.647058845	0	60.4937	977.4375	655.7305	4.2361	0.2543	554	2.602882757	0.006012659	9.418300588	0.021756274
9.569161265	×ÔÉí³µÁ¾	Road 1	32.76672286	36.20649834	7.59E-05	1.539770126	0.647058845	0	60.6344	977.4385	655.7304	4.2376	0.2528	555	1.702201447	0.003932085	9.4526448	0.021835609
9.585007487	×ÔÉí³µÁ¾	Road 1	32.926594	36.32008324	7.40E-05	1.538665056	0.647058845	0	60.856	977.4404	655.7303	4.2397	0.2507	556	2.828827451	0.006534591	9.497471029	0.021939158
9.600701222	×ÔÉí³µÁ¾	Road 1	33.08526445	36.39755745	7.09E-05	1.539712667	0.647058845	0	61.0075	977.4424	655.7303	4.2415	0.2499	557	2.134241629	0.004930098	9.530965251	0.02201653
9.617203946	×ÔÉí³µÁ¾	Road 1	33.25244574	36.46989555	6.77E-05	1.539977908	0.647058845	0	61.1492	977.4434	655.7303	4.243	0.2483	558	1.963810466	0.004536402	9.563373474	0.022091393
9.6656711	×ÔÉí³µÁ¾	Road 1	33.74636197	36.68666954	6.35E-05	1.538801789	0.647058845	0	61.5759	977.4482	655.7303	4.2478	0.2465	559	1.999166813	0.004618075	9.6602674	0.022315218
9.683225841	×ÔÉí³µÁ¾	Road 1	33.92591256	36.82094307	5.91E-05	1.538914323	0.647058845	0	61.8414	977.4521	655.7303	4.2497	0.2456	560	3.01585394	0.006966623	9.713209933	0.022437515
9.699539056	×ÔÉí³µÁ¾	Road 1	34.0930923	36.89322281	4.25E-05	1.538507342	0.647058845	0	61.9847	977.4531	655.7302	4.2522	0.244	561	1.998220187	0.004615889	9.745807329	0.022512815
9.715567456	×ÔÉí³µÁ¾	Road 1	34.25769796	36.97064896	3.60E-05	1.538336277	0.647058845	0	62.1386	977.4561	655.7303	4.2531	0.2441	562	2.129294502	0.00491867	9.779936514	0.022591653
9.732323105	×ÔÉí³µÁ¾	Road 1	34.430277	37.07911148	3.05E-05	1.539827108	0.647058845	0	62.3546	977.459	655.7302	4.255	0.2441	563	2.659607976	0.006143694	9.82449997	0.022694595
9.765673849	×ÔÉí³µÁ¾	Road 1	34.77478689	37.18764267	2.51E-05	1.540083885	0.647058845	0	62.5712	977.4619	655.7302	4.257	0.2431	564	1.633540142	0.003773478	9.87897975	0.022820443
9.782246586	×ÔÉí³µÁ¾	Road 1	34.94662405	37.3271965	1.95E-05	1.540202618	0.647058845	0	62.8506	977.4658	655.7302	4.26	0.2429	565	3.301596169	0.007626687	9.933696234	0.022946838
9.799271653	×ÔÉí³µÁ¾	Road 1	35.12349353	37.39956551	9.77E-06	1.54133749	0.647058845	0	62.9959	977.4678	655.7302	4.2617	0.2423	566	1.963419008	0.004535498	9.967123574	0.023024055
9.815608694	×ÔÉí³µÁ¾	Road 1	35.29370826	37.50820313	5.79E-06	1.541752696	0.647058845	0	63.2144	977.4717	655.7302	4.2637	0.2422	567	2.744099449	0.00633887	10.01195404	0.023127614
9.832305327	×ÔÉí³µÁ¾	Road 1	35.46800561	37.58065796	3.09E-06	1.541826725	0.647058845	0	63.3604	977.4736	655.7302	4.2653	0.2415	568	2.000275727	0.004620637	10.04535191	0.023204763
9.848985831	×ÔÉí³µÁ¾	Road 1	35.64249423	37.65827637	1.45E-06	1.542123556	0.647058845	0	63.5171	977.4766	655.7302	4.2662	0.2426	569	2.105696675	0.004864159	10.08047599	0.0232859
9.86562858	×ÔÉí³µÁ¾	Road 1	35.81704255	37.75662117	4.31E-07	1.542452335	0.647058845	0	63.6742	977.4795	655.7302	4.2671	0.2427	570	2.519264593	0.005819501	10.12240348	0.023382752
9.882248602	×ÔÉí³µÁ¾	Road 1	35.9917829	37.8498436	7.23E-08	1.544078469	0.647058845	0	63.9051	977.4824	655.7302	4.2703	0.2414	571	2.426831876	0.005605982	10.16273748	0.023475924
9.89951303	×ÔÉí³µÁ¾	Road 1	36.17364624	37.92237053	4.71E-10	1.544101834	0.647058845	0	64.0524	977.4854	655.7302	4.271	0.2427	572	1.970386898	0.004551594	10.19675508	0.023554504
9.915619874	×ÔÉí³µÁ¾	Road 1	36.34364011	37.99490089	-3.63E-08	1.544016123	0.647058845	0	64.2001	977.4883	655.7302	4.2717	0.2429	573	2.072694581	0.004787924	10.23013965	0.023631623
9.932250526	×ÔÉí³µÁ¾	Road 1	36.51971289	38.11407852	-3.26E-07	1.545198917	0.647058845	0	64.4432	977.4922	655.7302	4.2731	0.2424	574	2.953143203	0.006821761	10.27925235	0.023745073
9.949527784	×ÔÉí³µÁ¾	Road 1	36.70297965	38.18663635	-1.17E-06	1.544703364	0.647058845	0	64.5915	977.4951	655.7302	4.2739	0.2427	575	1.981596931	0.004577489	10.31348891	0.023824159
9.966699107	×ÔÉí³µÁ¾	Road 1	36.88564194	38.29549026	-3.00E-06	1.545265794	0.647058845	0	64.8146	977.499	655.7302	4.275	0.2435	576	2.692850159	0.006220484	10.35972871	0.023930973
9.982288007	×ÔÉí³µÁ¾	Road 1	37.05178531	38.36807899	-5.62E-06	1.545706153	0.647058845	0	64.9636	977.501	655.7302	4.2767	0.2428	577	2.140920578	0.004945527	10.3931033	0.024008069
9.999223634	×ÔÉí³µÁ¾	Road 1	37.23262332	38.44066772	-9.77E-06	1.545779109	0.647058845	0	65.113	977.5039	655.7302	4.2775	0.243	578	2.021513565	0.004669696	10.4273389	0.024087153
10.01557827	×ÔÉí³µÁ¾	Road 1	37.40763433	38.52361107	-1.42E-05	1.545599818	0.647058845	0	65.2626	977.5068	655.7302	4.2782	0.2432	579	2.286231189	0.005281194	10.46472938	0.024173525
10.03236544	×ÔÉí³µÁ¾	Road 1	37.58773338	38.6221447	-1.89E-05	1.546058774	0.647058845	0	65.4875	977.5107	655.7302	4.2784	0.244	580	2.556994271	0.005906657	10.50765409	0.024272681
10.04889639	×ÔÉí³µÁ¾	Road 1	37.76541704	38.69476433	-2.41E-05	1.546036363	0.647058845	0	65.6379	977.5137	655.7302	4.2792	0.2443	581	2.068579684	0.004778419	10.54184967	0.024351673
10.06650538	×ÔÉí³µÁ¾	Road 1	37.95522075	38.80366287	-2.98E-05	1.546427965	0.647058845	0	65.8639	977.5176	655.7302	4.2804	0.2441	582	2.672727209	0.006174	10.5889137	0.024460391
10.08344687	×ÔÉí³µÁ¾	Road 1	38.13817138	38.87628593	-3.41E-05	1.547240973	0.647058845	0	66.0149	977.5195	655.7302	4.2821	0.2433	583	2.041218904	0.004715216	10.62349499	0.024540273
10.09923225	×ÔÉí³µÁ¾	Road 1	38.30895556	38.94890556	-3.79E-05	1.547211409	0.647058845	0	66.1662	977.5225	655.7302	4.2819	0.2435	584	2.149978884	0.004966451	10.65743322	0.024618671
10.11560375	×ÔÉí³µÁ¾	Road 1	38.48657651	39.05784531	-4.00E-05	1.546679854	0.647058845	0	66.3937	977.5264	655.7302	4.2831	0.2433	585	2.846700019	0.006575877	10.70403796	0.024726328
10.13225383	×ÔÉí³µÁ¾	Road 1	38.66755583	39.13047523	-4.12E-05	1.547473788	0.647058845	0	66.5457	977.5293	655.7302	4.283	0.2435	586	2.078099446	0.00480041	10.73863848	0.024806255
10.14921621	×ÔÉí³µÁ¾	Road 1	38.85229637	39.20827904	-4.15E-05	1.546715736	0.647058845	0	66.7089	977.5322	655.7302	4.284	0.2444	587	2.157603295	0.004984064	10.77523658	0.024890796
10.1656163	×ÔÉí³µÁ¾	Road 1	39.03140918	39.31723251	-4.15E-05	1.547428489	0.647058845	0	66.9379	977.5371	655.7302	4.2833	0.2452	588	2.859981219	0.006606557	10.82214052	0.024999145
10.18233273	×ÔÉí³µÁ¾	Road 1	39.21419366	39.36392441	-4.15E-05	1.547377229	0.647058845	0	67.0363	977.5381	655.7302	4.2841	0.2444	589	1.555788139	0.003593871	10.84814774	0.025059221
10.19949489	×ÔÉí³µÁ¾	Road 1	39.4024456	39.48844414	-4.15E-05	1.547213912	0.647058845	0	67.2991	977.543	655.7302	4.2849	0.2445	590	3.079220863	0.007113	10.90099382	0.025181296
10.2155801	×ÔÉí³µÁ¾	Road 1	39.57920918	39.56110153	-4.15E-05	1.547935128	0.647058845	0	67.4528	977.5459	655.7302	4.2848	0.2446	591	2.150588648	0.00496786	10.93558651	0.025261205
10.23232219	×ÔÉí³µÁ¾	Road 1	39.76352907	39.63374863	-4.15E-05	1.547829032	0.647058845	0	67.6068	977.5488	655.7302	4.2847	0.2448	592	2.093133265	0.004835138	10.97062992	0.025342155
10.2495243	×ÔÉí³µÁ¾	Road 1	39.95345908	39.74790688	-4.15E-05	1.548093796	0.647058845	0	67.8493	977.5527	655.7302	4.2861	0.2443	593	2.885446021	0.00666538	11.02026569	0.025456814
10.26556407	×ÔÉí³µÁ¾	Road 1	40.13087925	39.82057457	-4.15E-05	1.548407912	0.647058845	0	68.004	977.5557	655.7302	4.286	0.2444	594	2.167357046	0.005006595	11.05502959	0.025537118
10.28224054	×ÔÉí³µÁ¾	Road 1	40.31570281	39.89841614	-4.15E-05	1.548284769	0.647058845	0	68.1701	977.5586	655.7302	4.2861	0.2444	595	2.218195756	0.005124032	11.09202127	0.025622569
10.29924544	×ÔÉí³µÁ¾	Road 1	40.50453413	39.97627144	-4.15E-05	1.548572898	0.647058845	0	68.3364	977.5615	655.7302	4.2872	0.2443	596	2.191105028	0.005061453	11.1292808	0.025708639
10.31562684	×ÔÉí³µÁ¾	Road 1	40.68693768	40.08527985	-4.15E-05	1.548804879	0.647058845	0	68.5699	977.5664	655.7302	4.2865	0.2449	597	2.913831844	0.006730952	11.17701343	0.025818901
10.33384431	×ÔÉí³µÁ¾	Road 1	40.89033715	40.19427109	-4.15E-05	1.54818809	0.647058845	0	68.8041	977.5703	655.7302	4.2869	0.2446	598	2.687972344	0.006209216	11.2259815	0.025932017
10.34946217	×ÔÉí³µÁ¾	Road 1	41.06504953	40.27214012	-4.15E-05	1.548923969	0.647058845	0	68.9717	977.5732	655.7302	4.287	0.2445	599	2.346796138	0.005421099	11.26263343	0.026016683
10.36555948	×ÔÉí³µÁ¾	Road 1	41.24545038	40.34481125	-4.11E-05	1.548348427	0.647058845	0	69.1284	977.5762	655.7302	4.2869	0.2446	600	2.186391617	0.005050565	11.29782846	0.026097984
10.38268279	×ÔÉí³µÁ¾	Road 1	41.43771973	40.42266998	-4.07E-05	1.548652649	0.647058845	0	69.2967	977.5791	655.7302	4.288	0.2455	601	2.201261188	0.005084913	11.33552132	0.026185054
10.39927752	×ÔÉí³µÁ¾	Road 1	41.62455648	40.53168182	-4.00E-05	1.549057007	0.647058845	0	69.5328	977.584	655.7302	4.2874	0.2461	602	2.913123039	0.006729314	11.38386381	0.026296725
10.41571096	×ÔÉí³µÁ¾	Road 1	41.80993292	40.60957146	-3.93E-05	1.549154758	0.647058845	0	69.7018	977.5869	655.7302	4.2876	0.246	603	2.277640807	0.00526135	11.4212933	0.026383188
10.43222615	×ÔÉí³µÁ¾	Road 1	41.99658872	40.68745079	-3.86E-05	1.548772454	0.647058845	0	69.8711	977.5898	655.7302	4.2877	0.2458	604	2.272976814	0.005250576	11.45883194	0.026469902
10.4491999	×ÔÉí³µÁ¾	Road 1	42.18894125	40.79647293	-3.76E-05	1.548999667	0.647058845	0	70.1088	977.5938	655.7302	4.2881	0.2455	605	2.878781394	0.006649985	11.50769565	0.026582777
10.46553877	×ÔÉí³µÁ¾	Road 1	42.37442898	40.86914749	-3.62E-05	1.549307227	0.647058845	0	70.2676	977.5967	655.7302	4.2881	0.2455	606	2.187448004	0.005053005	11.54343609	0.026665337
10.48222661	×ÔÉí³µÁ¾	Road 1	42.56426332	40.95220413	-3.48E-05	1.548706174	0.647058845	0	70.4494	977.6006	655.7302	4.2875	0.2461	607	2.378157978	0.005493545	11.58312239	0.026757013
10.49921282	×ÔÉí³µÁ¾	Road 1	42.75798183	41.0560421	-3.34E-05	1.549364567	0.647058845	0	70.6771	977.6045	655.7302	4.2877	0.2459	608	2.785532927	0.006434581	11.63043805	0.026866312
10.51556819	×ÔÉí³µÁ¾	Road 1	42.9448362	41.12874069	-3.17E-05	1.549224615	0.647058845	0	70.8369	977.6074	655.7302	4.2877	0.2459	609	2.198373902	0.005078244	11.66639326	0.026949368
10.53230404	×ÔÉí³µÁ¾	Road 1	43.1363995	41.20661316	-3.05E-05	1.5490731	0.647058845	0	71.0085	977.6104	655.7302	4.2888	0.2457	610	2.275905342	0.005257341	11.70448248	0.027037355
10.54951349	×ÔÉí³µÁ¾	Road 1	43.33390495	41.31566277	-2.91E-05	1.549793124	0.647058845	0	71.2491	977.6143	655.7302	4.2893	0.2453	611	2.880839477	0.006654739	11.75406013	0.027151879
10.56561373	×ÔÉí³µÁ¾	Road 1	43.51900577	41.38837166	-2.80E-05	1.549587011	0.647058845	0	71.4099	977.6172	655.7302	4.2893	0.2453	612	2.235765429	0.005164618	11.7900565	0.027235031
10.58229167	×ÔÉí³µÁ¾	Road 1	43.71110901	41.46625786	-2.74E-05	1.550285816	0.654901981	0	71.5825	977.6211	655.7302	4.2885	0.246	613	2.29444483	0.005300168	11.82832311	0.027323426
10.59954914	×ÔÉí³µÁ¾	Road 1	43.91041121	41.57551346	-2.71E-05	1.555173278	0.654901981	0	71.8247	977.625	655.7302	4.289	0.2456	614	2.895041009	0.006687545	11.87828418	0.027438836
10.61554748	×ÔÉí³µÁ¾	Road 1	44.0954969	41.64859314	-2.71E-05	1.558853865	0.654901981	0	71.9865	977.6279	655.7302	4.289	0.2455	615	2.26661666	0.005235884	11.91454629	0.027522602
10.63224448	×ÔÉí³µÁ¾	Road 1	44.28902934	41.72706642	-2.71E-05	1.562111974	0.654901981	0	72.1602	977.6309	655.7302	4.2892	0.2453	616	2.317733861	0.005353965	11.95324549	0.027611997
10.64928457	×ÔÉí³µÁ¾	Road 1	44.48706015	41.83725929	-2.71E-05	1.566996932	0.654901981	0	72.4039	977.6357	655.7302	4.2888	0.2458	617	2.960392959	0.006838508	12.00369087	0.027728526
10.66561282	×ÔÉí³µÁ¾	Road 1	44.67715202	41.91086082	-2.71E-05	1.568126559	0.654901981	0	72.5667	977.6387	655.7302	4.2888	0.2457	618	2.257166828	0.005214055	12.04054644	0.027813662
10.68225117	×ÔÉí³µÁ¾	Road 1	44.87109727	41.96346817	-2.71E-05	1.569306016	0.654901981	0	72.6832	977.6406	655.7302	4.289	0.2456	619	1.772286469	0.004093982	12.07003436	0.027881779
10.69964499	×ÔÉí³µÁ¾	Road 1	45.07448494	42.09515305	-2.71E-05	1.571599483	0.654901981	0	72.975	977.6465	655.7302	4.2884	0.2461	620	3.377238691	0.007801421	12.12877745	0.028017476
10.71561621	×ÔÉí³µÁ¾	Road 1	45.26158865	42.17419968	-2.71E-05	1.571438193	0.654901981	0	73.1506	977.6494	655.7302	4.2887	0.2459	621	2.430200906	0.005613764	12.16759072	0.028107135
10.73228278	×ÔÉí³µÁ¾	Road 1	45.45720448	42.25325317	-2.71E-05	1.572136998	0.654901981	0	73.3264	977.6523	655.7302	4.2889	0.2456	622	2.359016221	0.005449327	12.20690744	0.028197956
10.74918909	×ÔÉí³µÁ¾	Road 1	45.65598077	42.3270916	-2.71E-05	1.572836876	0.654901981	0	73.4909	977.6553	655.7302	4.289	0.2456	623	2.225406856	0.00514069	12.24453084	0.028284866
10.76553969	×ÔÉí³µÁ¾	Road 1	45.84858258	42.40617256	-2.71E-05	1.571840525	0.654901981	0	73.6674	977.6582	655.7302	4.2893	0.2453	624	2.400648656	0.005545498	12.2837829	0.028375538
10.78219893	×ÔÉí³µÁ¾	Road 1	46.04533248	42.51691475	-2.71E-05	1.573357224	0.654901981	0	73.8678	977.6621	655.7302	4.289	0.2455	625	3.069994951	0.007091688	12.33492669	0.028493681
10.79920934	×ÔÉí³µÁ¾	Road 1	46.24665335	42.60657692	-2.71E-05	1.572288871	0.654901981	0	74.116	977.667	655.7302	4.2886	0.2459	626	2.570157904	0.005937065	12.37864612	0.028594673
10.8156043	×ÔÉí³µÁ¾	Road 1	46.44102645	42.68039131	-2.71E-05	1.572568417	0.654901981	0	74.2819	977.6699	655.7302	4.2887	0.2458	627	2.291149928	0.005292556	12.41620942	0.028681444
10.83220269	×ÔÉí³µÁ¾	Road 1	46.63817615	42.75948944	-2.71E-05	1.573257208	0.654901981	0	74.4598	977.6729	655.7302	4.289	0.2455	628	2.391889435	0.005525265	12.45591095	0.028773154
10.84959175	×ÔÉí³µÁ¾	Road 1	46.84530304	42.88080597	-2.71E-05	1.572599649	0.654901981	0	74.7334	977.6777	655.7302	4.2891	0.2454	629	3.215213487	0.007427143	12.51182048	0.028902305
10.86556077	×ÔÉí³µÁ¾	Road 1	47.03584283	42.95462723	-2.71E-05	1.572449684	0.654901981	0	74.9003	977.6807	655.7302	4.2892	0.2453	630	2.348652167	0.005425387	12.54932615	0.028988943
10.88223724	×ÔÉí³µÁ¾	Road 1	47.2351659	43.02846909	-2.71E-05	1.573149443	0.654901981	0	75.0674	977.6836	655.7302	4.2893	0.2452	631	2.279774352	0.005266279	12.58734474	0.029076766
10.89953759	×ÔÉí³µÁ¾	Road 1	47.44250322	43.14446411	-2.71E-05	1.572069407	0.654901981	0	75.3307	977.6885	655.7302	4.2892	0.2453	632	3.132107095	0.007235167	12.6415313	0.029201937
10.91578739	×ÔÉí³µÁ¾	Road 1	47.63758323	43.21825447	-2.71E-05	1.572769165	0.654901981	0	75.4986	977.6914	655.7302	4.2893	0.2452	633	2.33071746	0.005383957	12.67940499	0.029289426
10.93238762	×ÔÉí³µÁ¾	Road 1	47.83738067	43.32896919	-2.71E-05	1.571697354	0.654901981	0	75.751	977.6963	655.7302	4.289	0.2455	634	3.131181278	0.007233029	12.73138331	0.029409495
10.949258	×ÔÉí³µÁ¾	Road 1	48.04077528	43.40273209	-2.71E-05	1.571549177	0.654901981	0	75.9197	977.6992	655.7302	4.2892	0.2454	635	2.276180632	0.005257977	12.76978335	0.0294982
10.96582964	×ÔÉí³µÁ¾	Road 1	48.24090772	43.47650185	-2.71E-05	1.572248936	0.654901981	0	76.0886	977.7021	655.7302	4.2893	0.2452	636	2.309287237	0.005334454	12.80805202	0.0295866
10.99916425	×ÔÉí³µÁ¾	Road 1	48.64494698	43.63456078	-2.71E-05	1.570657134	0.654901981	0	76.4515	977.709	655.7302	4.2891	0.2455	637	2.424140282	0.005599764	12.8888598	0.029773266
11.0155812	×ÔÉí³µÁ¾	Road 1	48.84450847	43.76095161	-2.71E-05	1.571248651	0.654901981	0	76.7428	977.7148	655.7302	4.2885	0.246	638	3.547699257	0.008195185	12.9471022	0.029907806
11.03220966	×ÔÉí³µÁ¾	Road 1	49.04698142	43.83465958	-2.71E-05	1.570250154	0.654901981	0	76.9131	977.7178	655.7302	4.2887	0.2459	639	2.318688855	0.005356171	12.98565841	0.029996871
11.04986263	×ÔÉí³µÁ¾	Road 1	49.2624969	43.95041771	-2.71E-05	1.570010185	0.654901981	0	77.1813	977.7227	655.7302	4.2887	0.2459	640	3.129188666	0.007228426	13.04089791	0.030124474
11.06554391	×ÔÉí³µÁ¾	Road 1	49.45426183	44.02409134	-2.71E-05	1.570289969	0.654901981	0	77.3523	977.7256	655.7302	4.2888	0.2457	641	2.428365183	0.005609524	13.07897777	0.030212439
11.08222368	×ÔÉí³µÁ¾	Road 1	49.65857857	44.09774437	-2.71E-05	1.569287419	0.654901981	0	77.5237	977.7285	655.7302	4.289	0.2455	642	2.324367176	0.005369288	13.11774768	0.030301997
11.1155352	×ÔÉí³µÁ¾	Road 1	50.06813264	44.26079865	-2.71E-05	1.5697999	0.654901981	0	77.9041	977.7354	655.7302	4.2891	0.2455	643	2.513078389	0.005805211	13.20146215	0.030495378
11.13226702	×ÔÉí³µÁ¾	Road 1	50.27421144	44.33968391	-2.71E-05	1.569219828	0.654901981	0	78.0763	977.7383	655.7302	4.2893	0.2453	644	2.44984169	0.005659134	13.24245246	0.030590065
11.14892223	×ÔÉí³µÁ¾	Road 1	50.47985732	44.45005875	-2.71E-05	1.568979859	0.654901981	0	78.3476	977.7432	655.7302	4.2893	0.2452	645	3.188250533	0.007364859	13.29555345	0.030712728
11.16556535	×ÔÉí³µÁ¾	Road 1	50.68569411	44.52366371	-2.71E-05	1.568828344	0.654901981	0	78.5206	977.7471	655.7302	4.2886	0.246	646	2.346562737	0.00542056	13.33460757	0.030802943
11.18219087	×ÔÉí³µÁ¾	Road 1	50.89165294	44.59720688	-2.71E-05	1.567408323	0.654901981	0	78.6938	977.75	655.7302	4.2888	0.2458	647	2.350317662	0.005429234	13.37368282	0.030893207
11.19952201	×ÔÉí³µÁ¾	Road 1	51.10680819	44.6917408	-2.71E-05	1.567629218	0.654901981	0	78.917	977.7539	655.7302	4.2889	0.2456	648	2.752065138	0.00635727	13.42137925	0.031003386
11.21555078	×ÔÉí³µÁ¾	Road 1	51.30633317	44.81254921	-2.71E-05	1.567379713	0.654901981	0	79.2029	977.7588	655.7302	4.2893	0.2453	649	3.563443816	0.008231555	13.47849686	0.031135328
11.23227674	×ÔÉí³µÁ¾	Road 1	51.51487816	44.88604088	-2.71E-05	1.566799402	0.654901981	0	79.3773	977.7617	655.7302	4.2895	0.2451	650	2.352118057	0.005433393	13.51783829	0.031226206
11.24950048	×ÔÉí³µÁ¾	Road 1	51.72998136	44.95954285	-2.71E-05	1.567499518	0.654901981	0	79.552	977.7656	655.7302	4.2888	0.2458	651	2.306413513	0.005327815	13.55756336	0.031317971
11.26558863	×ÔÉí³µÁ¾	Road 1	51.93141859	45.07504349	-2.71E-05	1.566829443	0.654901981	0	79.8271	977.7705	655.7302	4.2889	0.2457	652	3.443582167	0.007954675	13.61296422	0.031445947
11.28225703	×ÔÉí³µÁ¾	Road 1	52.14046126	45.14850082	-2.71E-05	1.566679478	0.654901981	0	80.0025	977.7734	655.7302	4.2891	0.2454	653	2.369237326	0.005472938	13.65245563	0.031537173
11.29921795	×ÔÉí³µÁ¾	Road 1	52.35351847	45.22195473	-2.71E-05	1.566099405	0.654901981	0	80.1782	977.7764	655.7302	4.2894	0.2452	654	2.342848471	0.00541198	13.6921925	0.031628965
11.31558505	×ÔÉí³µÁ¾	Road 1	52.55949786	45.30587997	-2.71E-05	1.5655092	0.654901981	0	80.3668	977.7803	655.7302	4.2889	0.2456	655	2.658171955	0.006140377	13.73569906	0.031729465
11.33219224	×ÔÉí³µÁ¾	Road 1	52.76898255	45.41073761	-2.71E-05	1.565279365	0.654901981	0	80.6313	977.7852	655.7302	4.2888	0.2457	656	3.12818608	0.00722611	13.78764945	0.03184947
11.34918176	×ÔÉí³µÁ¾	Road 1	52.98366098	45.48938255	-2.71E-05	1.565109372	0.654901981	0	80.8206	977.7881	655.7302	4.2893	0.2452	657	2.471988532	0.005710294	13.82964733	0.031946485
11.36558441	×ÔÉí³µÁ¾	Road 1	53.1914254	45.59944153	-2.71E-05	1.564879417	0.654901981	0	81.0863	977.793	655.7302	4.2893	0.2453	658	3.295607865	0.007612854	13.88370405	0.032071356
11.38225428	×ÔÉí³µÁ¾	Road 1	53.40291426	45.67280617	-2.74E-05	1.564719439	0.654901981	0	81.2638	977.7969	655.7302	4.2886	0.246	659	2.390939236	0.00552307	13.9235607	0.032163425
11.39921117	×ÔÉí³µÁ¾	Road 1	53.61856273	45.78284111	-2.74E-05	1.56455946	0.654901981	0	81.5305	977.8018	655.7302	4.2886	0.2461	660	3.220443107	0.007439224	13.97816939	0.032289571
11.41550972	×ÔÉí³µÁ¾	Road 1	53.8261709	45.85618172	-2.74E-05	1.564329267	0.654901981	0	81.7086	977.8047	655.7302	4.2889	0.2458	661	2.438459104	0.005632841	14.01791275	0.032381378
11.43223935	×ÔÉí³µÁ¾	Road 1	54.0396107	45.92950516	-2.74E-05	1.564169049	0.654901981	0	81.8871	977.8076	655.7302	4.2892	0.2455	662	2.395489245	0.00553358	14.05798838	0.032473953
11.44924352	×ÔÉí³µÁ¾	Road 1	54.25692424	46.00804367	-2.74E-05	1.563579202	0.654901981	0	82.0786	977.8115	655.7302	4.2888	0.246	663	2.492701047	0.005758139	14.1003747	0.032571866
11.46551495	×ÔÉí³µÁ¾	Road 1	54.4653937	46.12318382	-2.74E-05	1.562909365	0.654901981	0	82.3601	977.8164	655.7302	4.289	0.2457	664	3.47576298	0.008029012	14.15693032	0.032702509
11.48221818	×ÔÉí³µÁ¾	Road 1	54.67973533	46.19644547	-2.74E-05	1.562748909	0.654901981	0	82.5396	977.8193	655.7302	4.2893	0.2454	665	2.408964023	0.005564707	14.19716781	0.032795458
11.4995123	×ÔÉí³µÁ¾	Road 1	54.9020113	46.26968651	-2.74E-05	1.562167764	0.654901981	0	82.7194	977.8232	655.7302	4.2886	0.2461	666	2.351958838	0.005433025	14.23784286	0.032889417
11.51554913	×ÔÉí³µÁ¾	Road 1	55.10864037	46.38476486	-2.74E-05	1.562769413	0.654901981	0	83.0024	977.8281	655.7302	4.2889	0.2459	667	3.533696048	0.008162838	14.29451215	0.033020323
11.5323286	×ÔÉí³µÁ¾	Road 1	55.32517946	46.45799561	-2.74E-05	1.562189102	0.654901981	0	83.1829	977.8311	655.7302	4.2892	0.2455	668	2.412178766	0.005572133	14.33498724	0.033113821
11.54951569	×ÔÉí³µÁ¾	Road 1	55.54732824	46.53119545	-2.74E-05	1.562029362	0.654901981	0	83.3637	977.835	655.7302	4.2885	0.2462	669	2.373198594	0.005482089	14.37577561	0.033208042
11.56553346	×ÔÉí³µÁ¾	Road 1	55.75487509	46.6462326	-2.74E-05	1.562199235	0.654901981	0	83.6484	977.8398	655.7302	4.2888	0.2459	670	3.55434804	0.008210544	14.43270834	0.033339556
11.58226748	×ÔÉí³µÁ¾	Road 1	55.97206706	46.72463722	-2.74E-05	1.560759187	0.654901981	0	83.8429	977.8438	655.7302	4.2884	0.2463	671	2.553735678	0.005899129	14.47544261	0.033438272
11.59888127	×ÔÉí³µÁ¾	Road 1	56.18806011	46.80298347	-2.74E-05	1.560589075	0.654901981	0	84.0377	977.8467	655.7302	4.289	0.2457	672	2.569801594	0.005936242	14.51813675	0.033536896
11.61565341	×ÔÉí³µÁ¾	Road 1	56.40662296	46.91268539	-2.74E-05	1.560858846	0.654901981	0	84.3111	977.8516	655.7302	4.2891	0.2456	673	3.313504039	0.007654194	14.57371132	0.033665273
11.63223751	×ÔÉí³µÁ¾	Road 1	56.62304808	46.98056717	-2.74E-05	1.559779167	0.654901981	0	84.4806	977.8545	655.7302	4.2892	0.2454	674	2.326056643	0.005373191	14.61228687	0.033754383
11.64922739	×ÔÉí³µÁ¾	Road 1	56.84511363	47.05366402	-2.74E-05	1.561319232	0.662745118	0	84.6634	977.8584	655.7302	4.2886	0.246	675	2.41411774	0.005576612	14.65330244	0.033849129
11.68233144	×ÔÉí³µÁ¾	Road 1	57.27914655	47.2002182	-2.74E-05	1.565320015	0.662745118	0	84.9382	977.8633	655.7302	4.289	0.2459	676	2.470127779	0.005705995	14.73507368	0.03403802
11.6991868	×ÔÉí³µÁ¾	Road 1	57.50082909	47.3474041	-2.74E-05	1.573851466	0.662745118	0	85.3975	977.8721	655.7302	4.2886	0.2464	677	4.235741523	0.009784563	14.80646859	0.034202942
11.7158717	×ÔÉí³µÁ¾	Road 1	57.7206365	47.42650909	-2.75E-05	1.57580173	0.670588255	0	85.595	977.875	655.7302	4.2892	0.2457	678	2.610438445	0.006030113	14.8500235	0.034303554
11.73225053	×ÔÉí³µÁ¾	Road 1	57.9367484	47.50051918	-2.79E-05	1.580732584	0.678431392	0	85.7795	977.8789	655.7302	4.2887	0.2462	679	2.522898957	0.005827897	14.89134563	0.034399008
11.74923967	×ÔÉí³µÁ¾	Road 1	58.1614151	47.60687714	-2.84E-05	1.592404604	0.678431392	0	86.0437	977.8838	655.7302	4.2886	0.2463	680	3.243015075	0.007491365	14.94644168	0.03452628
11.76557891	×ÔÉí³µÁ¾	Road 1	58.37785181	47.68717003	-2.91E-05	1.600724459	0.678431392	0	86.2422	977.8867	655.7302	4.2893	0.2457	681	2.694357484	0.006223966	14.99046544	0.034627975
11.78218171	×ÔÉí³µÁ¾	Road 1	58.59812705	47.76249504	-3.00E-05	1.607785702	0.678431392	0	86.4278	977.8906	655.7302	4.2887	0.2462	682	2.542665607	0.005873558	15.03268079	0.034725493
11.79948939	×ÔÉí³µÁ¾	Road 1	58.82830011	47.87602501	-3.08E-05	1.614758372	0.678431392	0	86.7067	977.8955	655.7302	4.2889	0.246	683	3.383106737	0.007814977	15.09123452	0.034860752
11.81555884	×ÔÉí³µÁ¾	Road 1	59.04234507	47.95196114	-3.18E-05	1.617997408	0.678431392	0	86.893	977.8984	655.7302	4.2894	0.2456	684	2.629652641	0.006074498	15.13349161	0.034958366
11.83220746	×ÔÉí³µÁ¾	Road 1	59.26448123	48.03343849	-3.37E-05	1.61950779	0.678431392	0	87.0929	977.9023	655.7302	4.2891	0.2458	685	2.703364449	0.006244772	15.17849888	0.035062332
11.84951257	×ÔÉí³µÁ¾	Road 1	59.49592603	48.147686	-3.52E-05	1.622658253	0.678431392	0	87.3734	977.9072	655.7302	4.2893	0.2456	686	3.418235676	0.007896124	15.23765184	0.035198976
11.86559486	×ÔÉí³µÁ¾	Road 1	59.71135677	48.22391052	-3.71E-05	1.623338461	0.678431392	0	87.5608	977.9111	655.7302	4.2888	0.2461	687	2.648765237	0.006118648	15.28025004	0.035297378
11.8822629	×ÔÉí³µÁ¾	Road 1	59.93516333	48.33823013	-3.91E-05	1.622658372	0.678431392	0	87.8424	977.916	655.7302	4.289	0.2459	688	3.537677037	0.008172034	15.33921619	0.035433589
11.89947198	×ÔÉí³µÁ¾	Road 1	60.16659913	48.41449928	-4.15E-05	1.623758554	0.678431392	0	88.0305	977.9199	655.7302	4.2885	0.2464	689	2.529395646	0.005842904	15.38274475	0.03553414
11.91550917	×ÔÉí³µÁ¾	Road 1	60.38263887	48.49619293	-4.49E-05	1.623148441	0.678431392	0	88.2324	977.9229	655.7302	4.2893	0.2456	690	2.810308858	0.006491813	15.42781423	0.035638251
11.93216915	×ÔÉí³µÁ¾	Road 1	60.607446	48.57783852	-4.93E-05	1.622118235	0.678431392	0	88.4346	977.9268	655.7302	4.289	0.2459	691	2.733455015	0.006314281	15.47335353	0.035743447
11.94915976	×ÔÉí³µÁ¾	Road 1	60.8372798	48.69758263	-5.52E-05	1.622688413	0.678431392	0	88.7318	977.9326	655.7302	4.2886	0.2463	692	3.641074522	0.008410882	15.53521761	0.035886353
11.96553749	×ÔÉí³µÁ¾	Road 1	61.0591945	48.77922478	-6.28E-05	1.622508287	0.678431392	0	88.9349	977.9355	655.7302	4.2893	0.2456	693	2.779035165	0.006419571	15.5807319	0.035991491
11.98224439	×ÔÉí³µÁ¾	Road 1	61.28594807	48.8608326	-7.38E-05	1.621898293	0.678431392	0	89.1383	977.9395	655.7302	4.2891	0.2458	694	2.740881847	0.006331437	15.62652352	0.036097269
11.99919504	×ÔÉí³µÁ¾	Road 1	61.5165479	48.97505951	-8.75E-05	1.622058272	0.678431392	0	89.4236	977.9453	655.7302	4.2885	0.2465	695	3.529725031	0.008153665	15.68635468	0.036235479
12.01551009	×ÔÉí³µÁ¾	Road 1	61.73887056	49.05665016	-0.000106357	1.621878505	0.678431392	0	89.6278	977.9482	655.7302	4.2892	0.2457	696	2.799920961	0.006467817	15.73203552	0.036341002
12.03229763	×ÔÉí³µÁ¾	Road 1	61.96798684	49.13278885	-0.000126638	1.620848298	0.678431392	0	89.8187	977.9521	655.7302	4.2888	0.2461	697	2.606414604	0.006020818	15.77579081	0.036442077
12.04915225	×ÔÉí³µÁ¾	Road 1	62.19873072	49.2848877	-0.000150898	3.588303804	0.678431392	0	90.1056	977.957	655.7302	4.2891	0.2458	698	4.520957175	0.010443411	15.85198982	0.036618096
12.06550725	×ÔÉí³µÁ¾	Road 1	62.42371263	49.52215118	-0.000184822	5.196564198	0.678431392	0	90.2977	977.9609	655.7302	4.2887	0.2462	699	6.878887209	0.015890229	15.96449403	0.036877981
12.08219289	×ÔÉí³µÁ¾	Road 1	62.65460825	49.81675301	-0.000222811	5.212797165	0.678431392	0	90.5185	977.9648	655.7302	4.2888	0.2461	700	8.26616955	0.019094852	16.10242033	0.037196591
12.09919486	×ÔÉí³µÁ¾	Road 1	62.8915354	50.16698341	-0.000269479	5.032247066	0.678431392	0	90.7963	977.9697	655.7302	4.289	0.2459	701	9.58971398	0.022152239	16.2654644	0.037573223
12.1158552	×ÔÉí³µÁ¾	Road 1	63.12434848	50.30671234	-0.00032354	1.740989089	0.678431392	0	91.0056	977.9736	655.7302	4.2889	0.246	702	4.332417765	0.010007885	16.33764396	0.037739958
12.13218821	×ÔÉí³µÁ¾	Road 1	63.35293561	50.38346901	-0.000394641	1.902778506	0.678431392	0	91.2014	977.9775	655.7302	4.2885	0.2464	703	2.736526541	0.006321376	16.38233968	0.037843205
12.1494717	×ÔÉí³µÁ¾	Road 1	63.59583924	50.59470863	-0.000465495	3.578460455	0.678431392	0	91.4958	977.9824	655.7302	4.289	0.2459	704	6.026304889	0.013920764	16.48649525	0.038083804
12.1655001	×ÔÉí³µÁ¾	Road 1	63.82189991	50.77352486	-0.00054558	3.053034782	0.678431392	0	91.707	977.9863	655.7302	4.2889	0.246	705	5.581447111	0.012893143	16.57595692	0.03829046
12.18223706	×ÔÉí³µÁ¾	Road 1	64.05850169	50.89136353	-0.000640464	1.964911819	0.678431392	0	91.9047	977.9902	655.7302	4.2886	0.2463	706	3.788718478	0.00875194	16.63936853	0.038436941
12.19947912	×ÔÉí³µÁ¾	Road 1	64.30284778	51.01742477	-0.00073303	1.636956692	0.678431392	0	92.216	977.9961	655.7302	4.2883	0.2465	707	3.91629093	0.009046632	16.70689348	0.038592924
12.21552659	×ÔÉí³µÁ¾	Road 1	64.53069744	51.11455078	-0.000834924	2.199042559	0.678431392	0	92.4146	977.999	655.7302	4.289	0.2458	708	3.36855797	0.007781369	16.76095029	0.038717795
12.23220672	×ÔÉí³µÁ¾	Road 1	64.76805218	51.22721901	-0.000920493	2.10311985	0.678431392	0	92.6278	978.0029	655.7302	4.2889	0.2458	709	3.685451541	0.008513393	16.82242413	0.0388598
12.2494169	×ÔÉí³µÁ¾	Road 1	65.01355588	51.35410767	-0.000994289	1.693529487	0.678431392	0	92.927	978.0088	655.7302	4.2885	0.2457	710	3.967471491	0.009164859	16.89070502	0.039017529
12.26613186	×ÔÉí³µÁ¾	Road 1	65.25231564	51.42310181	-0.001058557	1.479022861	0.678431392	0	93.1268	978.0127	655.7302	4.2882	0.2459	711	2.533059765	0.005851368	16.93304501	0.039115334
12.28220865	×ÔÉí³µÁ¾	Road 1	65.48230495	51.50043869	-0.001101929	1.602114677	0.678431392	0	93.3412	978.0166	655.7302	4.2881	0.246	712	2.839925385	0.006560228	16.97870188	0.039220801
12.2988239	×ÔÉí³µÁ¾	Road 1	65.72034692	51.57615509	-0.001124547	1.59489429	0.678431392	0	93.5416	978.0205	655.7302	4.2878	0.2462	713	2.730820404	0.006308195	17.02407517	0.039325614
12.31555646	×ÔÉí³µÁ¾	Road 1	65.96057	51.6838623	-0.001134477	1.355303407	0.678431392	0	93.8571	978.0264	655.7302	4.2877	0.2463	714	3.574073636	0.00825611	17.08387855	0.039463759
12.33224503	×ÔÉí³µÁ¾	Road 1	66.20044181	51.74431458	-0.001134477	1.290352345	0.678431392	0	94.0582	978.0293	655.7302	4.2884	0.2456	715	2.321338655	0.005362292	17.12261837	0.039553248
12.34921181	×ÔÉí³µÁ¾	Road 1	66.44459126	51.80345192	-0.001134477	1.281280994	0.678431392	0	94.2595	978.0332	655.7302	4.2881	0.2459	716	2.262418093	0.005226186	17.16100433	0.03964192
12.36548067	×ÔÉí³µÁ¾	Road 1	66.67910387	51.89333038	-0.001134477	1.19944787	0.678431392	0	94.5763	978.0391	655.7302	4.2879	0.246	717	3.179022744	0.007343543	17.21272341	0.039761391
12.38218281	×ÔÉí³µÁ¾	Road 1	66.92010715	51.94617462	-0.001125538	1.132337093	0.678431392	0	94.7782	978.043	655.7302	4.2877	0.2462	718	2.123643458	0.004905616	17.24819278	0.039843325
12.39916242	×ÔÉí³µÁ¾	Road 1	67.16547143	52.02187729	-0.001120592	1.110053897	0.678431392	0	95.0814	978.0488	655.7302	4.2873	0.2466	719	2.707547042	0.006254434	17.29416589	0.039949523
12.41555664	×ÔÉí³µÁ¾	Road 1	67.40260594	52.07225647	-0.001109761	1.111014605	0.678431392	0	95.2838	978.0527	655.7302	4.287	0.2468	720	2.087202095	0.004821437	17.32838394	0.040028567
12.43224045	×ÔÉí³µÁ¾	Road 1	67.64415932	52.12193871	-0.001097053	1.08327055	0.678431392	0	95.4863	978.0557	655.7302	4.2878	0.246	721	2.046095987	0.004726482	17.36252061	0.040107423
12.44944659	×ÔÉí³µÁ¾	Road 1	67.89350403	52.1697876	-0.00108928	1.044224501	0.678431392	0	95.6891	978.0596	655.7302	4.2875	0.2463	722	1.958967287	0.004525214	17.39622688	0.040185284
12.46550065	×ÔÉí³µÁ¾	Road 1	68.12649172	52.24570656	-0.001081544	1.025212049	0.678431392	0	96.0226	978.0664	655.7302	4.2867	0.247	723	2.839957218	0.006560301	17.44181973	0.040290604
12.48220278	×ÔÉí³µÁ¾	Road 1	68.36909987	52.29208946	-0.001073846	1.035854816	0.678431392	0	96.2258	978.0703	655.7302	4.2864	0.2472	724	1.961134654	0.004530221	17.47457485	0.040366268
12.49924324	×ÔÉí³µÁ¾	Road 1	68.61695081	52.36145439	-0.001069052	1.017402887	0.678431392	0	96.531	978.0752	655.7302	4.2871	0.2466	725	2.548008851	0.0058859	17.5179941	0.040466566
12.51553813	×ÔÉí³µÁ¾	Road 1	68.85416117	52.40645714	-0.001061413	0.995429933	0.678431392	0	96.7347	978.0791	655.7302	4.2868	0.2468	726	1.957861862	0.004522661	17.54989724	0.040540263
12.53215852	×ÔÉí³µÁ¾	Road 1	69.09632882	52.45385971	-0.00105381	0.988939643	0.678431392	0	96.9531	978.084	655.7302	4.2859	0.2477	727	2.000249398	0.004620576	17.58314216	0.040617058
12.54919348	×ÔÉí³µÁ¾	Road 1	69.34485288	52.52060509	-0.001050022	1.000251532	0.678431392	0	97.2593	978.0889	655.7302	4.2865	0.246	728	2.485735985	0.00574205	17.62548659	0.040714874
12.56554336	×ÔÉí³µÁ¾	Road 1	69.58358518	52.56532631	-0.001044357	0.997170568	0.678431392	0	97.4636	978.0928	655.7302	4.2863	0.2462	729	1.95085673	0.004506479	17.65738284	0.040788554
12.58216961	×ÔÉí³µÁ¾	Road 1	69.82657165	52.61264992	-0.001040592	0.981328487	0.678431392	0	97.6827	978.0977	655.7302	4.2854	0.2471	730	2.002783507	0.00462643	17.69068163	0.040865475
12.59918551	×ÔÉí³µÁ¾	Road 1	70.07545847	52.65618668	-0.001040592	0.973568022	0.678431392	0	97.8873	978.1016	655.7302	4.2852	0.2473	731	1.873363082	0.004327469	17.72255859	0.04093911
12.61552109	×ÔÉí³µÁ¾	Road 1	70.31460565	52.70275841	-0.001040592	0.978559554	0.678431392	0	98.1068	978.1055	655.7302	4.2852	0.2472	732	2.007813843	0.00463805	17.75535739	0.041014876
12.6321609	×ÔÉí³µÁ¾	Road 1	70.55843818	52.75281143	-0.001040592	0.98396033	0.678431392	0	98.3411	978.1094	655.7302	4.2855	0.2469	733	2.080974169	0.00480705	17.78998442	0.041094864
12.64913832	×ÔÉí³µÁ¾	Road 1	70.80746852	52.80599213	-0.001040592	0.977450073	0.678431392	0	98.5903	978.1143	655.7302	4.2852	0.2472	734	2.139475414	0.004942188	17.82630718	0.04117877
12.66550798	×ÔÉí³µÁ¾	Road 1	71.04792125	52.88011894	-0.001040592	0.967969298	0.678431392	0	98.9425	978.1211	655.7302	4.2847	0.2477	735	2.779223025	0.006420005	17.87180213	0.041283863
12.68222404	×ÔÉí³µÁ¾	Road 1	71.29366242	52.92325058	-0.001040592	0.971211016	0.678431392	0	99.1482	978.125	655.7302	4.2845	0.2478	736	1.891251856	0.004368792	17.9034164	0.041356892
12.69882061	×ÔÉí³µÁ¾	Road 1	71.53784674	52.96660194	-0.001040592	0.974932551	0.678431392	0	99.3541	978.1289	655.7302	4.2844	0.248	737	1.907111269	0.004405427	17.9350679	0.041430007
12.7155374	×ÔÉí³µÁ¾	Road 1	71.78410196	53.03163071	-0.001040592	0.970092833	0.678431392	0	99.6632	978.1348	655.7302	4.2841	0.2482	738	2.49416656	0.005761525	17.97676236	0.041526321
12.73220031	×ÔÉí³µÁ¾	Road 1	72.02976265	53.07467308	-0.001040592	0.964882612	0.678431392	0	99.8695	978.1387	655.7302	4.284	0.2484	739	1.89712445	0.004382357	18.00837398	0.041599344
12.74886029	×ÔÉí³µÁ¾	Road 1	72.27557874	53.11759529	-0.001040592	0.964783192	0.678431392	0	100.076	978.1426	655.7302	4.2838	0.2485	740	1.895316851	0.004378182	18.03994991	0.041672284
12.76554482	×ÔÉí³µÁ¾	Road 1	72.52207084	53.18527107	-0.001040592	0.96928525	0.678431392	0	100.4007	978.1484	655.7302	4.284	0.2475	741	2.57681029	0.005952432	18.0829428	0.041771598
12.78217767	×ÔÉí³µÁ¾	Road 1	72.76799869	53.22840958	-0.001040592	0.968335807	0.678431392	0	100.6076	978.1523	655.7302	4.284	0.2477	742	1.906554932	0.004404142	18.11465424	0.041844851
12.79885964	×ÔÉí³µÁ¾	Road 1	73.01485202	53.27140388	-0.001040592	0.964396477	0.678431392	0	100.8147	978.1563	655.7302	4.2839	0.2478	743	1.900362651	0.004389838	18.14635604	0.041918082
12.81556617	×ÔÉí³µÁ¾	Road 1	73.26238111	53.33870888	-0.001040592	0.963137925	0.678431392	0	101.1404	978.1631	655.7302	4.2832	0.2487	744	2.570704883	0.005938328	18.18930359	0.042017291
12.83220379	×ÔÉí³µÁ¾	Road 1	73.50908754	53.38163109	-0.001040592	0.964978874	0.678431392	0	101.3478	978.167	655.7303	4.2831	0.2489	745	1.90484587	0.004400194	18.22099569	0.0420905
12.84887	×ÔÉí³µÁ¾	Road 1	73.75643102	53.42766037	-0.001040592	0.965469778	0.678431392	0	101.5703	978.1709	655.7303	4.2832	0.2487	746	1.990194056	0.004597348	18.25416468	0.04216712
12.86549039	×ÔÉí³µÁ¾	Road 1	74.00339152	53.49199905	-0.001040592	0.962340295	0.678431392	0	101.8821	978.1768	655.7303	4.282	0.2489	747	2.504477386	0.005785343	18.29579007	0.042263275
12.8821379	×ÔÉí³µÁ¾	Road 1	74.25093861	53.53168716	-0.001040592	0.961000383	0.678431392	0	102.001	978.1797	655.7303	4.2812	0.2497	748	1.818845794	0.004201534	18.32606933	0.04233322
12.89880558	×ÔÉí³µÁ¾	Road 1	74.49902595	53.58362503	-0.001040592	0.962531865	0.678431392	0	102.3282	978.1855	655.7303	4.2812	0.2496	749	2.1590219	0.004987341	18.3620552	0.042416348
12.91546006	×ÔÉí³µÁ¾	Road 1	74.74712928	53.62953758	-0.001040592	0.964122891	0.678431392	0	102.5515	978.1904	655.7303	4.2804	0.2504	750	1.994238084	0.00460669	18.3952682	0.04249307
12.93213396	×ÔÉí³µÁ¾	Road 1	74.99573458	53.67542953	-0.001040592	0.962303281	0.678431392	0	102.775	978.1943	655.7303	4.2805	0.2502	751	1.993626472	0.004605277	18.42850974	0.042569857
12.9488097	×ÔÉí³µÁ¾	Road 1	75.24462168	53.73036461	-0.001040592	0.960704029	0.678431392	0	103.0435	978.1992	655.7303	4.2805	0.2502	752	2.246789742	0.005190084	18.46597662	0.042656406
12.96545502	×ÔÉí³µÁ¾	Road 1	75.49336507	53.79749451	-0.001040592	0.96138525	0.678431392	0	103.372	978.2061	655.7303	4.2796	0.2511	753	2.592245518	0.005988087	18.50912536	0.04275608
12.98220443	×ÔÉí³µÁ¾	Road 1	75.74387728	53.84330406	-0.001040592	0.962126076	0.678431392	0	103.5962	978.21	655.7303	4.2797	0.2509	754	1.990866812	0.004598902	18.54247122	0.042833109
12.99882812	×ÔÉí³µÁ¾	Road 1	75.99269229	53.88299217	-0.001040592	0.960746527	0.678431392	0	103.7907	978.2139	655.7303	4.2793	0.2512	755	1.830406528	0.004228239	18.57289933	0.042903397
13.01546317	×ÔÉí³µÁ¾	Road 1	76.24198718	53.95003624	-0.001040592	0.959487498	0.678431392	0	104.1202	978.2207	655.7303	4.2785	0.2511	756	2.597505243	0.006000237	18.61610896	0.043003212
13.03212938	×ÔÉí³µÁ¾	Road 1	76.49196048	53.99571533	-0.001040592	0.959798217	0.678431392	0	104.345	978.2246	655.7303	4.2786	0.2512	757	1.998373958	0.004616244	18.64941427	0.043080147
13.04879486	×ÔÉí³µÁ¾	Road 1	76.74212029	54.03838348	-0.001040592	0.960548639	0.678431392	0	104.555	978.2285	655.7303	4.2785	0.2514	758	1.915469424	0.004424734	18.68133648	0.043153887
13.06551128	×ÔÉí³µÁ¾	Road 1	76.99325727	54.08411407	-0.001040592	0.95999974	0.678431392	0	104.7803	978.2334	655.7303	4.2777	0.2522	759	1.99874723	0.004617106	18.71474839	0.043231069
13.08219142	×ÔÉí³µÁ¾	Road 1	77.24417331	54.15409355	-0.001040592	0.958550632	0.678431392	0	105.126	978.2402	655.7303	4.2771	0.2528	760	2.68335969	0.006198561	18.7595072	0.043334462
13.09883967	×ÔÉí³µÁ¾	Road 1	77.4948065	54.19666557	-0.001040592	0.958441377	0.678431392	0	105.3366	978.2441	655.7303	4.277	0.2529	761	1.918740736	0.004432291	18.79145087	0.043408252
13.11545566	×ÔÉí³µÁ¾	Road 1	77.74515065	54.23925476	-0.001040592	0.958762109	0.678431392	0	105.5474	978.248	655.7303	4.2769	0.2529	762	1.922823025	0.004441721	18.82340048	0.043482055
13.13214203	×ÔÉí³µÁ¾	Road 1	77.99686534	54.30617523	-0.001040592	0.958222747	0.678431392	0	105.879	978.2549	655.7303	4.276	0.2538	763	2.603394004	0.00601384	18.86684168	0.043582404
13.14882913	×ÔÉí³µÁ¾	Road 1	78.24878831	54.34872322	-0.001040592	0.957633853	0.678431392	0	106.0903	978.2588	655.7303	4.276	0.2538	764	1.919812339	0.004434767	18.89887778	0.043656408
13.16546455	×ÔÉí³µÁ¾	Road 1	78.50022579	54.41251602	-0.001040592	0.957714736	0.678431392	0	106.4074	978.2646	655.7303	4.2758	0.2539	765	2.52537587	0.005833618	18.94088846	0.043753452
13.18214468	×ÔÉí³µÁ¾	Road 1	78.75253623	54.45503998	-0.001040592	0.957605541	0.678431392	0	106.6191	978.2695	655.7303	4.2748	0.255	766	1.922805232	0.00444168	18.97296112	0.04382754
13.1987768	×ÔÉí³µÁ¾	Road 1	79.0043167	54.4975502	-0.001040592	0.957927406	0.678431392	0	106.8309	978.2734	655.7303	4.2747	0.255	767	1.927148994	0.004451714	19.00501369	0.043901582
13.21544338	×ÔÉí³µÁ¾	Road 1	79.25681563	54.54006729	-0.001040592	0.95696795	0.678431392	0	107.0429	978.2773	655.7303	4.2746	0.2551	768	1.926123253	0.004449345	19.03711557	0.043975737
13.23219316	×ÔÉí³µÁ¾	Road 1	79.51087157	54.60377426	-0.001040592	0.956138372	0.678431392	0	107.3612	978.2842	655.7304	4.2735	0.2561	769	2.518438201	0.005817592	19.07929886	0.04407318
13.24883738	×ÔÉí³µÁ¾	Road 1	79.76352255	54.64622612	-0.001040592	0.956028998	0.678431392	0	107.5736	978.2881	655.7304	4.2734	0.2552	770	1.929057736	0.004456123	19.11140651	0.044147349
13.26551531	×ÔÉí³µÁ¾	Road 1	80.01698039	54.70989189	-0.001040592	0.955440044	0.678431392	0	107.8925	978.2939	655.7304	4.2734	0.2553	771	2.52932708	0.005842746	19.15359047	0.044244794
13.28214927	×ÔÉí³µÁ¾	Road 1	80.2699797	54.75533066	-0.001040592	0.955750763	0.678431392	0	108.1205	978.2988	655.7304	4.2726	0.256	772	2.017957433	0.004661482	19.18715708	0.044322333
13.29880264	×ÔÉí³µÁ¾	Road 1	80.52347065	54.79773445	-0.001040592	0.955221474	0.678431392	0	108.3335	978.3027	655.7304	4.2725	0.256	773	1.931545524	0.00446187	19.21932384	0.044396638
13.3163035	×ÔÉí³µÁ¾	Road 1	80.79018554	54.86437683	-0.001040592	0.955052495	0.678431392	0	108.6685	978.3096	655.7304	4.2717	0.2568	774	2.531114601	0.005846875	19.26362051	0.044498963
13.33216915	×ÔÉí³µÁ¾	Road 1	81.0321664	54.90673943	-0.001040592	0.954513192	0.678431392	0	108.8819	978.3135	655.7304	4.2717	0.2568	775	1.993525001	0.004605043	19.29524908	0.044572025
13.34883426	×ÔÉí³µÁ¾	Road 1	81.28653654	54.94908485	-0.001040592	0.954173803	0.678431392	0	109.0955	978.3184	655.7305	4.2707	0.2578	776	1.933540574	0.004466479	19.32747175	0.04464646
13.36547298	×ÔÉí³µÁ¾	Road 1	81.54079739	55.01259956	-0.001040592	0.953825414	0.678431392	0	109.4161	978.3242	655.7305	4.2706	0.2578	777	2.541631917	0.00587117	19.36976124	0.044744148
13.38215238	×ÔÉí³µÁ¾	Road 1	81.79587611	55.05492783	-0.001040592	0.953715622	0.678431392	0	109.6301	978.3291	655.7305	4.2696	0.2588	778	1.935162931	0.004470226	19.40203861	0.044818709
13.39885634	×ÔÉí³µÁ¾	Road 1	82.05162497	55.1184082	-0.001040592	0.95397675	0.678431392	0	109.9514	978.335	655.7305	4.2695	0.2589	779	2.537869179	0.005862478	19.44443108	0.044916636
13.415476	×ÔÉí³µÁ¾	Road 1	82.30627827	55.16070213	-0.001040592	0.952587843	0.678431392	0	110.1658	978.3389	655.7305	4.2695	0.2589	780	1.941668817	0.004485255	19.47670095	0.044991179
13.43212315	×ÔÉí³µÁ¾	Road 1	82.56154823	55.20296173	-0.001040592	0.953328013	0.678431392	0	110.3804	978.3438	655.7305	4.2685	0.2599	781	1.939939633	0.004481261	19.50899541	0.045065779
13.44879486	×ÔÉí³µÁ¾	Road 1	82.81739054	55.24523163	-0.001040592	0.95279938	0.678431392	0	110.5951	978.3477	655.7305	4.2685	0.2599	782	1.939705757	0.00448072	19.54133362	0.045140481
13.46545593	×ÔÉí³µÁ¾	Road 1	83.07339098	55.31464806	-0.001040592	0.952199638	0.678431392	0	110.9482	978.3545	655.7305	4.2681	0.2603	783	2.720622365	0.006284638	19.58666211	0.045245189
13.49878102	×ÔÉí³µÁ¾	Road 1	83.58605116	55.38100204	-0.001040592	0.952451646	0.678431392	0	111.2864	978.3613	655.7305	4.2674	0.26	784	1.683119091	0.003888005	19.6427522	0.045374758
13.51547362	×ÔÉí³µÁ¾	Road 1	83.84323518	55.46544228	-0.001040592	0.950951993	0.678431392	0	111.7174	978.3701	655.7305	4.2665	0.2609	785	3.154268408	0.00728636	19.69540514	0.045496386
13.53219114	×ÔÉí³µÁ¾	Road 1	84.10101304	55.51062355	-0.001040592	0.951503634	0.678431392	0	111.9485	978.375	655.7305	4.2658	0.2616	786	2.027730821	0.004684058	19.72930379	0.045574692
13.54876975	×ÔÉí³µÁ¾	Road 1	84.35684307	55.55282135	-0.001040592	0.951393723	0.678431392	0	112.1645	978.3789	655.7305	4.2658	0.2616	787	1.95358483	0.004512781	19.76169149	0.045649507
13.56553236	×ÔÉí³µÁ¾	Road 1	84.61579307	55.61305046	-0.001040592	0.950614274	0.678431392	0	112.396	978.3838	655.7305	4.2651	0.2623	788	2.458460311	0.005679043	19.80290171	0.045744703
13.58220223	×ÔÉí³µÁ¾	Road 1	84.87353349	55.66121864	-0.001040592	0.950876176	0.678431392	0	112.7204	978.3906	655.7305	4.2642	0.2632	789	2.122251558	0.004902401	19.83827938	0.045826425
13.59886954	×ÔÉí³µÁ¾	Road 1	85.13149896	55.72139969	-0.001040592	0.950336874	0.678431392	0	112.9369	978.3945	655.7305	4.2642	0.2632	790	2.47114497	0.005708345	19.87946671	0.045921568
13.6155812	×ÔÉí³µÁ¾	Road 1	85.39037419	55.76649857	-0.001040592	0.950177848	0.678431392	0	113.262	978.4014	655.7305	4.2633	0.2641	791	2.033779845	0.004698031	19.91345455	0.04600008
13.63215211	×ÔÉí³µÁ¾	Road 1	85.6472766	55.81160088	-0.001040592	0.94896853	0.678431392	0	113.4944	978.4063	655.7306	4.2626	0.2648	792	2.046334165	0.004727032	19.94736416	0.046078411
13.64885497	×ÔÉí³µÁ¾	Road 1	85.90642001	55.85367165	-0.001040592	0.948859155	0.678431392	0	113.7115	978.4102	655.7306	4.2626	0.2648	793	1.949737522	0.004503894	19.97993036	0.046153639
13.66545996	×ÔÉí³µÁ¾	Road 1	86.16433592	55.91675034	-0.001040592	0.948700368	0.678431392	0	114.0374	978.417	655.7306	4.2617	0.2657	794	2.569560766	0.005935685	20.0225979	0.046252201
13.68212507	×ÔÉí³µÁ¾	Road 1	86.4233802	55.95879364	-0.001040592	0.949010253	0.678431392	0	114.2549	978.4219	655.7306	4.2608	0.2666	795	1.95480546	0.004515601	20.05517494	0.046327454
13.69888879	×ÔÉí³µÁ¾	Road 1	86.68415302	56.00085068	-0.001040592	0.949140966	0.678431392	0	114.4726	978.4258	655.7306	4.2608	0.2665	796	1.949266806	0.004502806	20.08785189	0.046402938
13.71543513	×ÔÉí³µÁ¾	Road 1	86.94184785	56.06684761	-0.001040592	0.947692752	0.678431392	0	114.815	978.4326	655.7306	4.2602	0.2672	797	2.667533024	0.006162001	20.13198981	0.046504896
13.73211453	×ÔÉí³µÁ¾	Road 1	87.20182355	56.11186752	-0.001040592	0.948853731	0.678431392	0	115.0486	978.4375	655.7306	4.2596	0.2668	798	2.044756524	0.004723388	20.16609513	0.04658368
13.74885699	×ÔÉí³µÁ¾	Road 1	87.46304691	56.1688385	-0.001040592	0.947464168	0.678431392	0	115.2669	978.4424	655.7306	4.2587	0.2677	799	2.387776345	0.005515763	20.20607237	0.046676027
13.76549644	×ÔÉí³µÁ¾	Road 1	87.72288488	56.21680412	-0.001040592	0.948155463	0.678431392	0	115.5946	978.4492	655.7307	4.2578	0.2686	800	2.137103006	0.004936708	20.24163258	0.046758171
13.78213845	×ÔÉí³µÁ¾	Road 1	87.98297078	56.2617691	-0.001040592	0.946946084	0.678431392	0	115.8289	978.4541	655.7307	4.2572	0.2693	801	2.050762619	0.004737262	20.27576141	0.046837009
13.79881309	×ÔÉí³µÁ¾	Road 1	88.24377458	56.30668602	-0.001040592	0.946216702	0.678431392	0	116.0633	978.458	655.7307	4.2575	0.2689	802	2.048188009	0.004731314	20.3099142	0.046915902
13.815465	×ÔÉí³µÁ¾	Road 1	88.50451384	56.36957932	-0.001040592	0.947328031	0.678431392	0	116.3919	978.4648	655.7307	4.2566	0.2698	803	2.577319811	0.005953609	20.35283151	0.047015041
13.8321664	×ÔÉí³µÁ¾	Road 1	88.7661668	56.39951019	-0.001040592	0.946418226	0.678431392	0	116.5015	978.4678	655.7307	4.2557	0.2707	804	1.61191514	0.003723524	20.37975275	0.047077229
13.84876993	×ÔÉí³µÁ¾	Road 1	89.02654865	56.45635757	-0.001040592	0.946249247	0.678431392	0	116.8463	978.4746	655.7307	4.2551	0.2713	805	2.4087236	0.005564152	20.41974605	0.047169613
13.8654376	×ÔÉí³µÁ¾	Road 1	89.28822742	56.51919594	-0.001040592	0.945660353	0.678431392	0	117.1757	978.4814	655.7307	4.2533	0.2721	806	2.580015486	0.005959836	20.46274891	0.04726895
13.88211078	×ÔÉí³µÁ¾	Road 1	89.55020018	56.56403389	-0.001040592	0.945301056	0.678431392	0	117.4113	978.4863	655.7307	4.2527	0.2727	807	2.053982943	0.004744701	20.49699533	0.047348059
13.8988261	×ÔÉí³µÁ¾	Road 1	89.81302961	56.60588837	-0.001040592	0.944771767	0.678431392	0	117.6313	978.4902	655.7307	4.2528	0.2726	808	1.964718103	0.004538499	20.52983623	0.047423922
13.91549415	×ÔÉí³µÁ¾	Road 1	90.07540589	56.66860313	-0.001040592	0.944412649	0.678431392	0	117.9616	978.4971	655.7307	4.252	0.2735	809	2.582377386	0.005965292	20.5728794	0.047523351
13.93217208	×ÔÉí³µÁ¾	Road 1	90.33813177	56.71043701	-0.001040592	0.945153713	0.678431392	0	118.182	978.502	655.7307	4.2511	0.2743	810	1.969938779	0.004550559	20.60573392	0.047599245
13.94882216	×ÔÉí³µÁ¾	Road 1	90.60061214	56.75223999	-0.001040592	0.944194078	0.678431392	0	118.4026	978.5068	655.7307	4.2502	0.2752	811	1.972318164	0.004556055	20.63857318	0.047675104
13.96548801	×ÔÉí³µÁ¾	Road 1	90.86363118	56.81492386	-0.001040592	0.944455445	0.678431392	0	118.7338	978.5137	655.7307	4.2494	0.2751	812	2.587607561	0.005977373	20.68169783	0.047774722
13.98208127	×ÔÉí³µÁ¾	Road 1	91.12569743	56.85671654	-0.001040592	0.943915904	0.678431392	0	118.9548	978.5176	655.7307	4.2495	0.275	813	1.979315311	0.004572218	20.71454114	0.04785059
13.99882959	×ÔÉí³µÁ¾	Road 1	91.39042052	56.90142746	-0.001040592	0.943136692	0.678431392	0	119.1917	978.5225	655.7308	4.2489	0.2755	814	2.054790662	0.004746566	20.74895542	0.047930087
14.01544044	×ÔÉí³µÁ¾	Road 1	91.65325987	56.96404266	-0.001040592	0.942547619	0.678431392	0	119.5238	978.5293	655.7308	4.2481	0.2763	815	2.597707191	0.006000704	20.79210557	0.048029764
14.03212132	×ÔÉí³µÁ¾	Road 1	91.91741409	57.00872612	-0.001040592	0.943088531	0.678431392	0	119.7612	978.5342	655.7308	4.2475	0.2769	816	2.062605836	0.004764619	20.82651163	0.048109242
14.04882271	×ÔÉí³µÁ¾	Road 1	92.18208694	57.05045013	-0.001040592	0.942979157	0.678431392	0	119.9829	978.5391	655.7308	4.2467	0.2778	817	1.974976506	0.004562196	20.8594965	0.048185437
14.06547902	×ÔÉí³µÁ¾	Road 1	92.44633465	57.11298981	-0.001040592	0.942150116	0.678431392	0	120.3158	978.5459	655.7308	4.2459	0.2785	818	2.596407724	0.005997702	20.90274307	0.048285336
14.0821489	×ÔÉí³µÁ¾	Road 1	92.71099055	57.15467606	-0.001040592	0.942891181	0.678431392	0	120.538	978.5508	655.7308	4.245	0.2794	819	1.979251811	0.004572072	20.93573695	0.048361552
14.09879788	×ÔÉí³µÁ¾	Road 1	92.97558993	57.21418076	-0.001040592	0.941081524	0.678431392	0	120.7603	978.5557	655.7308	4.2442	0.2802	820	2.511258368	0.005801007	20.97754684	0.048458133
14.11543623	×ÔÉí³µÁ¾	Road 1	93.24022651	57.25878181	-0.001040592	0.942002773	0.678431392	0	121.094	978.5625	655.7308	4.2434	0.281	821	2.071276875	0.00478465	21.01200947	0.048537742
14.13212077	×ÔÉí³µÁ¾	Road 1	93.50579078	57.30044746	-0.001040592	0.94146347	0.678431392	0	121.3167	978.5674	655.7308	4.2426	0.2818	822	1.981837083	0.004578044	21.04507551	0.048614124
14.1488086	×ÔÉí³µÁ¾	Road 1	93.77160044	57.34205475	-0.001040592	0.940923989	0.678431392	0	121.5396	978.5713	655.7308	4.2427	0.2817	823	1.981082181	0.0045763	21.07813548	0.048690493
14.16542606	×ÔÉí³µÁ¾	Road 1	94.03660472	57.41043434	-0.001040592	0.941175401	0.678431392	0	121.9061	978.5791	655.7308	4.2416	0.2829	824	2.786887007	0.006437709	21.12444645	0.048797471
14.18215715	×ÔÉí³µÁ¾	Road 1	94.30362817	57.4549839	-0.001040592	0.939535737	0.678431392	0	122.1454	978.584	655.7309	4.241	0.2834	825	2.068446264	0.004778111	21.15905381	0.048877414
14.19876104	×ÔÉí³µÁ¾	Road 1	94.56881325	57.49652939	-0.001040592	0.940276802	0.678431392	0	122.3688	978.5889	655.7309	4.2402	0.2842	826	1.99002491	0.004596958	21.19209597	0.048953742
14.21542065	×ÔÉí³µÁ¾	Road 1	94.8351767	57.55887337	-0.001040592	0.939497769	0.678431392	0	122.7044	978.5957	655.7309	4.2395	0.284	827	2.608137466	0.006024798	21.23554653	0.049054112
14.23217886	×ÔÉí³µÁ¾	Road 1	95.10332372	57.60335083	-0.001040592	0.939568579	0.678431392	0	122.9442	978.6006	655.7309	4.239	0.2845	828	2.068729598	0.004778765	21.27021474	0.049134196
14.24877689	×ÔÉí³µÁ¾	Road 1	95.3690992	57.64489975	-0.001040592	0.939879298	0.678431392	0	123.1683	978.6055	655.731	4.2381	0.2853	829	1.994930451	0.004608289	21.30332665	0.049210685
14.26543577	×ÔÉí³µÁ¾	Road 1	95.63613704	57.70714417	-0.001040592	0.938440204	0.670588255	0	123.5047	978.6133	655.731	4.2364	0.287	830	2.611190536	0.00603185	21.34682616	0.049311168
14.28212214	×ÔÉí³µÁ¾	Road 1	95.90375281	57.73675232	-0.001040592	0.937950313	0.670588255	0	123.6329	978.6152	655.731	4.2368	0.2866	831	1.634186357	0.00377497	21.37409479	0.049374159
14.29888072	×ÔÉí³µÁ¾	Road 1	96.17280134	57.7957489	-0.001040592	0.932670414	0.670588255	0	123.9858	978.623	655.731	4.2354	0.2881	832	2.506947571	0.005791049	21.41610768	0.049471209
14.31551687	×ÔÉí³µÁ¾	Road 1	96.44016941	57.85743713	-0.001040592	0.931651235	0.670588255	0	124.3231	978.6299	655.731	4.2347	0.2888	833	2.603064941	0.00601308	21.45941266	0.049571243
14.33216952	×ÔÉí³µÁ¾	Road 1	96.70799255	57.8985054	-0.001040592	0.929841578	0.662745118	0	124.5481	978.6348	655.731	4.2339	0.2896	834	1.983850979	0.004582696	21.49244903	0.049647557
14.3488075	×ÔÉí³µÁ¾	Road 1	96.97576908	57.93944321	-0.001040592	0.926331699	0.662745118	0	124.7733	978.6396	655.731	4.2331	0.2904	835	1.982206268	0.004578896	21.52542894	0.049723741
14.3655034	×ÔÉí³µÁ¾	Road 1	97.24477465	58.00346603	-0.001040592	0.921914458	0.662745118	0	125.1275	978.6475	655.731	4.2317	0.2918	836	2.672248122	0.006172893	21.57004453	0.049826803
14.38222569	×ÔÉí³µÁ¾	Road 1	97.51439382	58.04401932	-0.001040592	0.918824494	0.662745118	0	125.3531	978.6523	655.7311	4.231	0.2926	837	1.967496657	0.004544917	21.60294558	0.049902804
14.39875994	×ÔÉí³µÁ¾	Road 1	97.78116682	58.08445587	-0.001040592	0.918105066	0.654901981	0	125.5789	978.6563	655.731	4.2311	0.2925	838	1.97895693	0.004571391	21.63566615	0.049978389
14.41548113	×ÔÉí³µÁ¾	Road 1	98.0512369	58.14491501	-0.001040592	0.91302377	0.654901981	0	125.9178	978.6641	655.7311	4.2295	0.2942	839	2.568145321	0.005932416	21.6786086	0.050077586
14.43217483	×ÔÉí³µÁ¾	Road 1	98.32106199	58.18783722	-0.001040592	0.908655047	0.654901981	0	126.1601	978.6689	655.7311	4.229	0.2947	840	2.0450243	0.004724006	21.71274762	0.050156447
14.44881355	×ÔÉí³µÁ¾	Road 1	98.59018255	58.22769012	-0.001040592	0.905573487	0.654901981	0	126.3864	978.6738	655.7311	4.2282	0.2945	841	1.957735117	0.004522368	21.74532182	0.050231693
14.46547279	×ÔÉí³µÁ¾	Road 1	98.85991119	58.28734589	-0.001040592	0.904374361	0.654901981	0	126.7262	978.6807	655.7311	4.2276	0.2952	842	2.556206459	0.005904837	21.78790629	0.050330064
14.48209941	×ÔÉí³µÁ¾	Road 1	99.12921638	58.31002579	-0.001040592	0.903226018	0.654901981	0	126.8557	978.6836	655.7311	4.227	0.2958	843	1.440763265	0.003328163	21.81186131	0.0503854
14.49877699	×ÔÉí³µÁ¾	Road 1	99.3996344	58.37209854	-0.001040592	0.897670448	0.654901981	0	127.1636	978.6904	655.7311	4.2258	0.297	844	2.630535374	0.006076537	21.85573225	0.050486742
14.51547618	×ÔÉí³µÁ¾	Road 1	99.67063849	58.42284851	-0.001040592	0.900122225	0.654901981	0	127.5041	978.6973	655.7311	4.2251	0.2977	845	2.288124017	0.005285566	21.89394209	0.050575006
14.53209657	×ÔÉí³µÁ¾	Road 1	99.9405459	58.46233063	-0.001040592	0.898772717	0.654901981	0	127.7313	978.7021	655.7311	4.2244	0.2985	846	1.95448729	0.004514866	21.92642643	0.050650045
14.54880787	×ÔÉí³µÁ¾	Road 1	100.2122037	58.52419739	-0.001040592	0.897053063	0.654901981	0	127.975	978.708	655.7312	4.2229	0.3	847	2.626564307	0.006067364	21.97031972	0.050751439
14.56543632	×ÔÉí³µÁ¾	Road 1	100.4827222	58.56626816	-0.001040592	0.895512581	0.654901981	0	128.3326	978.7158	655.7312	4.2216	0.3013	848	2.035583798	0.004702199	22.00416833	0.050829629
14.58212746	×ÔÉí³µÁ¾	Road 1	100.7544423	58.60550308	-0.001040592	0.8944332	0.654901981	0	128.5604	978.7207	655.7312	4.2209	0.3021	849	1.945946704	0.004495137	22.03664839	0.050904658
14.59883069	×ÔÉí³µÁ¾	Road 1	101.0265413	58.64472427	-0.001041532	0.894303381	0.654901981	0	128.7883	978.7256	655.7312	4.2201	0.3028	850	1.945769645	0.004494728	22.06914903	0.050979734
14.61550386	×ÔÉí³µÁ¾	Road 1	101.2984488	58.70911789	-0.001046243	0.893464446	0.654901981	0	129.1631	978.7334	655.7312	4.2191	0.3039	851	2.71504222	0.006271748	22.11441739	0.051084304
14.63208686	×ÔÉí³µÁ¾	Road 1	101.5690662	58.74826355	-0.001046243	0.892804921	0.654901981	0	129.3915	978.7383	655.7313	4.2184	0.3046	852	1.955005529	0.004516063	22.14683725	0.051159194
14.64875893	×ÔÉí³µÁ¾	Road 1	101.8413183	58.78738174	-0.001046243	0.892847538	0.654901981	0	129.62	978.7432	655.7313	4.2176	0.3054	853	1.948866242	0.004501881	22.17932889	0.05123425
14.66547353	×ÔÉí³µÁ¾	Road 1	102.114537	58.84602814	-0.001046243	0.891376436	0.654901981	0	129.963	978.751	655.7313	4.2161	0.307	854	2.541134142	0.00587002	22.22180292	0.051332365
14.68208292	×ÔÉí³µÁ¾	Road 1	102.3862293	58.88788605	-0.001046243	0.891337276	0.654901981	0	130.2082	978.7559	655.7313	4.2156	0.3075	855	2.04007706	0.004712578	22.25568736	0.051410638
14.69881987	×ÔÉí³µÁ¾	Road 1	102.6602026	58.92973022	-0.001046243	0.891680062	0.654901981	0	130.4536	978.7607	655.7313	4.2152	0.3069	856	2.031118039	0.004691883	22.28968209	0.051489166
14.71547362	×ÔÉí³µÁ¾	Road 1	102.9330847	58.98825302	-0.001046243	0.890260756	0.654901981	0	130.7975	978.7686	655.7313	4.2136	0.3085	857	2.549305313	0.005888895	22.33213757	0.051587238
14.73210757	×ÔÉí³µÁ¾	Road 1	103.2058355	59.03004227	-0.001046243	0.89054966	0.654901981	0	131.0433	978.7744	655.7313	4.2121	0.3099	858	2.040276921	0.00471304	22.36607544	0.051665634
14.74874702	×ÔÉí³µÁ¾	Road 1	103.4788566	59.06903	-0.001046243	0.890042305	0.654901981	0	131.2729	978.7793	655.7313	4.2114	0.3107	859	1.955115574	0.004516317	22.39860748	0.051740783
14.76542349	×ÔÉí³µÁ¾	Road 1	103.7527561	59.127491	-0.001046243	0.889933348	0.654901981	0	131.6176	978.7861	655.7314	4.2108	0.3113	860	2.550279246	0.005891145	22.44113714	0.051839027
14.79883508	×ÔÉí³µÁ¾	Road 1	104.3020604	59.1859108	-0.001046243	0.888932228	0.654901981	0	131.9626	978.7939	655.7314	4.2092	0.3129	861	1.654216154	0.003821239	22.49640714	0.0519667
14.81543165	×ÔÉí³µÁ¾	Road 1	104.5753012	59.26931076	-0.001046243	0.888733685	0.654901981	0	132.456	978.8047	655.7314	4.2074	0.3147	862	3.333066304	0.007699383	22.55172459	0.052094484
14.83213121	×ÔÉí³µÁ¾	Road 1	104.8504182	59.30820236	-0.001046243	0.887996495	0.654901981	0	132.6866	978.8096	655.7314	4.2067	0.3154	863	1.954548623	0.004515007	22.5843647	0.052169882
14.84879376	×ÔÉí³µÁ¾	Road 1	105.1251567	59.36099167	-0.001050968	0.888533711	0.654901981	0	132.9172	978.8145	655.7314	4.206	0.3161	864	2.386197339	0.005512116	22.62412481	0.052261728
14.86546766	×ÔÉí³µÁ¾	Road 1	105.4003012	59.40539703	-0.001056657	0.887536049	0.654901981	0	133.2635	978.8223	655.7314	4.2044	0.3177	865	2.128746614	0.004917405	22.65961933	0.052343721
14.8821511	×ÔÉí³µÁ¾	Road 1	105.6757958	59.44702835	-0.001069052	0.887838602	0.654901981	0	133.5111	978.8281	655.7315	4.202	0.3191	866	2.043886725	0.004721378	22.69371839	0.052422489
14.89874473	×ÔÉí³µÁ¾	Road 1	105.9499865	59.48587189	-0.001084441	0.887327433	0.654901981	0	133.7423	978.833	655.7315	4.2013	0.3198	867	1.965658913	0.004540672	22.72633581	0.052497836
14.91548535	×ÔÉí³µÁ¾	Road 1	106.2268769	59.54412003	-0.001101929	0.887600183	0.654901981	0	134.0894	978.8398	655.7315	4.2008	0.3203	868	2.552696154	0.005896728	22.76906952	0.052596551
14.93207128	×ÔÉí³µÁ¾	Road 1	106.5014004	59.58570328	-0.00112158	0.886260808	0.654901981	0	134.3375	978.8457	655.7315	4.1994	0.3207	869	2.054015872	0.004744777	22.80313729	0.052675247
14.94882546	×ÔÉí³µÁ¾	Road 1	106.7789149	59.63002625	-0.001137467	0.886331677	0.654901981	0	134.5692	978.8506	655.7316	4.1987	0.3213	870	2.126557913	0.004912349	22.83876603	0.05275755
14.96546271	×ÔÉí³µÁ¾	Road 1	107.0547359	59.68266449	-0.001150486	0.88600266	0.654901981	0	134.9171	978.8584	655.7316	4.1972	0.3228	871	2.395332	0.005533217	22.87861777	0.052849607
14.98211206	×ÔÉí³µÁ¾	Road 1	107.3309366	59.72141876	-0.001158546	0.88590163	0.654901981	0	135.1493	978.8633	655.7316	4.1965	0.3235	872	1.965448994	0.004540187	22.91134121	0.052925198
14.99875957	×ÔÉí³µÁ¾	Road 1	107.6072861	59.76017303	-0.001166645	0.885812521	0.654901981	0	135.3815	978.8691	655.7316	4.1948	0.3251	873	1.966662288	0.00454299	22.94408125	0.053000828
15.01542505	×ÔÉí³µÁ¾	Road 1	107.8842156	59.82103729	-0.001166645	0.885403574	0.654901981	0	135.7469	978.877	655.7316	4.1936	0.3263	874	2.652355965	0.006126942	22.98828402	0.053102936
15.0321653	×ÔÉí³µÁ¾	Road 1	108.1625677	59.85977783	-0.00117478	0.885545433	0.654901981	0	135.9795	978.8818	655.7316	4.1929	0.327	875	1.962347489	0.004533023	23.02113421	0.05317882
15.04881941	×ÔÉí³µÁ¾	Road 1	108.4397562	59.91783371	-0.001178862	0.884964943	0.654901981	0	136.3288	978.8896	655.7316	4.1914	0.3284	876	2.570222223	0.005937213	23.06393898	0.053277699
15.06541231	×ÔÉí³µÁ¾	Road 1	108.7161041	59.95652618	-0.001183978	0.884645998	0.654901981	0	136.5618	978.8945	655.7317	4.1908	0.3291	877	1.974180214	0.004560356	23.09669635	0.053353369
15.08209428	×ÔÉí³µÁ¾	Road 1	108.9941147	59.99519806	-0.001188081	0.884126842	0.654901981	0	136.795	978.9004	655.7317	4.1891	0.3307	878	1.968167024	0.004546466	23.12952926	0.053429213
15.09878835	×ÔÉí³µÁ¾	Road 1	109.2725958	60.05319901	-0.001196317	0.884210169	0.654901981	0	137.1451	978.9072	655.7317	4.1886	0.3312	879	2.569319186	0.005935127	23.17242164	0.053528294
15.11545896	×ÔÉí³µÁ¾	Road 1	109.5508646	60.09185028	-0.001196317	0.884101152	0.654901981	0	137.3786	978.9131	655.7317	4.187	0.3328	880	1.971034106	0.004553089	23.20527998	0.053604197
15.13220177	×ÔÉí³µÁ¾	Road 1	109.8306083	60.14981003	-0.001201483	0.88395083	0.654901981	0	137.7293	978.9209	655.7318	4.1855	0.3342	881	2.566437279	0.00592847	23.24824937	0.053703456
15.16541873	×ÔÉí³µÁ¾	Road 1	110.3861409	60.20772858	-0.001205626	0.882755935	0.654901981	0	138.0802	978.9287	655.7318	4.184	0.3347	882	1.675087983	0.003869453	23.30389069	0.053831987
15.18212342	×ÔÉí³µÁ¾	Road 1	110.6658619	60.28218842	-0.00120978	0.883643627	0.654901981	0	138.4148	978.9355	655.7318	4.1824	0.3363	883	3.089551961	0.007136865	23.35550072	0.053951207
15.19882555	×ÔÉí³µÁ¾	Road 1	110.9457317	60.32351074	-0.001218114	0.882448912	0.654901981	0	138.7832	978.9443	655.7318	4.1811	0.3375	884	2.058511822	0.004755162	23.38988225	0.054030628
15.21545804	×ÔÉí³µÁ¾	Road 1	111.2246126	60.36208649	-0.00122125	0.882569909	0.654901981	0	139.0178	978.9492	655.7318	4.1805	0.3382	885	1.978954395	0.004571385	23.42279718	0.054106661
15.23208356	×ÔÉí³µÁ¾	Road 1	111.5036184	60.41440201	-0.001222296	0.88205868	0.654901981	0	139.2525	978.9551	655.7318	4.1788	0.3398	886	2.412069662	0.005571881	23.46289909	0.054199297
15.24874574	×ÔÉí³µÁ¾	Road 1	111.7834434	60.45847092	-0.001222296	0.882312238	0.654901981	0	139.605	978.9629	655.7319	4.1774	0.3412	887	2.151610247	0.00497022	23.4987496	0.054282112
15.26549625	×ÔÉí³µÁ¾	Road 1	112.0649311	60.49699173	-0.001222296	0.881560624	0.654901981	0	139.8401	978.9678	655.7319	4.1768	0.3418	888	1.972452697	0.004556366	23.5317892	0.054358433
15.2821379	×ÔÉí³µÁ¾	Road 1	112.3447802	60.53826599	-0.001222296	0.881691992	0.654901981	0	140.0922	978.9736	655.7319	4.1755	0.3431	889	2.067966361	0.004777002	23.56620358	0.05443793
15.29879825	×ÔÉí³µÁ¾	Road 1	112.6252618	60.60701981	-0.001222296	0.880857885	0.654901981	0	140.5128	978.9834	655.7319	4.1734	0.3452	890	2.931629856	0.006772065	23.61504554	0.054550755
15.31538051	×ÔÉí³µÁ¾	Road 1	112.9046061	60.64549255	-0.001222296	0.880766809	0.654901981	0	140.7485	978.9883	655.7319	4.1728	0.3458	891	1.987265833	0.004590584	23.64799891	0.054626877
15.3321193	×ÔÉí³µÁ¾	Road 1	113.1867661	60.68397217	-0.001227537	0.880889952	0.654901981	0	140.9843	978.9932	655.7319	4.1722	0.3464	892	1.977177907	0.004567281	23.68109447	0.054703328
15.34879211	×ÔÉí³µÁ¾	Road 1	113.4679921	60.72243118	-0.001227537	0.880789101	0.654901981	0	141.2204	978.999	655.7319	4.1706	0.348	893	1.982365526	0.004579264	23.71414607	0.054779677
15.3654092	×ÔÉí³µÁ¾	Road 1	113.7485444	60.78010254	-0.001227537	0.879990816	0.654901981	0	141.5746	979.0068	655.732	4.1693	0.3483	894	2.594839776	0.00599408	23.75726475	0.054879282
15.3820864	×ÔÉí³µÁ¾	Road 1	114.0302898	60.81854095	-0.001227537	0.880532026	0.654901981	0	141.811	979.0127	655.732	4.1677	0.3499	895	1.984060475	0.00458318	23.79035333	0.054955716
15.39877277	×ÔÉí³µÁ¾	Road 1	114.3124697	60.87890396	-0.001227537	0.879333675	0.654901981	0	142.1828	979.0205	655.7321	4.1667	0.351	896	2.675778478	0.006181048	23.83500236	0.055058855
15.41544814	×ÔÉí³µÁ¾	Road 1	114.5946417	60.91732178	-0.001227537	0.880032539	0.654901981	0	142.4196	979.0264	655.7321	4.1651	0.3525	897	1.986279732	0.004588306	23.86812432	0.055135367
15.43213891	×ÔÉí³µÁ¾	Road 1	114.8772521	60.95569839	-0.001227537	0.878713608	0.654901981	0	142.6565	979.0313	655.7321	4.1646	0.3531	898	1.984923758	0.004585174	23.90125422	0.055211897
15.44871458	×ÔÉí³µÁ¾	Road 1	115.1581029	60.99680786	-0.001228587	0.879425049	0.654901981	0	142.9105	979.0371	655.7321	4.1634	0.3544	899	2.081326148	0.004807863	23.93575359	0.055291591
15.46542367	×ÔÉí³µÁ¾	Road 1	115.4415069	61.05983505	-0.001228587	0.878426731	0.654901981	0	143.3003	979.0459	655.7321	4.1617	0.3561	900	2.764297659	0.006385528	23.9819425	0.055398287
15.48207632	×ÔÉí³µÁ¾	Road 1	115.7241436	61.10091705	-0.001228587	0.878728092	0.654901981	0	143.5547	979.0518	655.7321	4.1604	0.3573	901	2.07744546	0.004798899	24.01653747	0.055478202
15.49870294	×ÔÉí³µÁ¾	Road 1	116.0065157	61.13927307	-0.001228587	0.878439128	0.654901981	0	143.7924	979.0576	655.7322	4.1589	0.3588	902	1.994030601	0.004606211	24.04969146	0.055554787
15.51543916	×ÔÉí³µÁ¾	Road 1	116.2910163	61.19673843	-0.001228587	0.878070951	0.654901981	0	144.1491	979.0654	655.7322	4.1576	0.3602	903	2.59101421	0.005985243	24.09305524	0.055654958
15.53213469	×ÔÉí³µÁ¾	Road 1	116.5749267	61.21862869	-0.001228587	0.878011644	0.654901981	0	144.2851	979.0684	655.7322	4.1571	0.3607	904	1.469681791	0.003394965	24.11759236	0.055711638
15.54877891	×ÔÉí³µÁ¾	Road 1	116.8582428	61.27881317	-0.00123174	0.877253413	0.654901981	0	144.6593	979.0771	655.7322	4.1552	0.3617	905	2.690565814	0.006215207	24.16237472	0.055815086
15.56537291	×ÔÉí³µÁ¾	Road 1	117.1409687	61.33623734	-0.00123174	0.877693057	0.654901981	0	145.0168	979.0859	655.7322	4.1529	0.364	906	2.610515581	0.006030291	24.20569361	0.055915152
15.60042007	×ÔÉí³µÁ¾	Road 1	117.7390544	61.4345993	-0.00123174	0.877010822	0.654901981	0	145.6306	979.0996	655.7323	4.1504	0.3666	907	2.266680133	0.005236031	24.28513432	0.05609866
15.61574615	×ÔÉí³µÁ¾	Road 1	118.0007709	61.47556458	-0.001232792	0.87648201	0.654901981	0	145.8866	979.1055	655.7323	4.1492	0.3678	908	2.197709284	0.005076708	24.31881659	0.056176466
15.6320612	×ÔÉí³µÁ¾	Road 1	118.2795488	61.513797	-0.001237008	0.876628757	0.654901981	0	146.1256	979.1113	655.7324	4.1477	0.3694	909	2.023798127	0.004674974	24.35183495	0.056252739
15.64910643	×ÔÉí³µÁ¾	Road 1	118.5709844	61.55200195	-0.001241233	0.875884295	0.654901981	0	146.3649	979.1162	655.7324	4.1472	0.3699	910	1.970630885	0.004552157	24.38542481	0.056330331
15.66578363	×ÔÉí³µÁ¾	Road 1	118.8563929	61.60929565	-0.001244407	0.875718296	0.654901981	0	146.724	979.125	655.7324	4.1449	0.3722	911	2.60745575	0.006023223	24.42890988	0.056430782
15.68208402	×ÔÉí³µÁ¾	Road 1	119.1355256	61.64747314	-0.001253965	0.875397265	0.654901981	0	146.9636	979.1309	655.7324	4.1435	0.3737	912	2.026873353	0.004682077	24.4619487	0.056507101
15.69878615	×ÔÉí³µÁ¾	Road 1	119.4217529	61.69381485	-0.001263571	0.87510854	0.654901981	0	147.2034	979.1357	655.7324	4.1429	0.3743	913	2.258580136	0.00521732	24.4996718	0.056594242
15.71545126	×ÔÉí³µÁ¾	Road 1	119.7075728	61.74288254	-0.001272151	0.875360489	0.654901981	0	147.5633	979.1445	655.7324	4.1407	0.3766	914	2.350638597	0.005429975	24.53884545	0.056684733
15.73208154	×ÔÉí³µÁ¾	Road 1	119.9929718	61.78103943	-0.001280769	0.874845803	0.654901981	0	147.8034	979.1504	655.7325	4.1382	0.3771	915	2.00515615	0.004631911	24.57219177	0.056761763
15.74873639	×ÔÉí³µÁ¾	Road 1	120.2789939	61.82462082	-0.001288343	0.875148714	0.654901981	0	148.0609	979.1563	655.7325	4.1371	0.3783	916	2.178454855	0.005032231	24.60847359	0.056845574
15.76553309	×ÔÉí³µÁ¾	Road 1	120.5677063	61.87908554	-0.001299213	0.874180436	0.654901981	0	148.4216	979.1641	655.7325	4.1358	0.3796	917	2.514514967	0.00580853	24.65070915	0.056943138
15.78214798	×ÔÉí³µÁ¾	Road 1	120.8534693	61.91717377	-0.001312338	0.874468267	0.654901981	0	148.6622	979.1699	655.7325	4.1344	0.3811	918	2.007841543	0.004638114	24.68406922	0.0570202
15.79875114	×ÔÉí³µÁ¾	Road 1	121.1392943	61.97432327	-0.001324447	0.873913586	0.654901981	0	149.0235	979.1787	655.7325	4.1319	0.3834	919	2.624686847	0.006063027	24.72764732	0.057120865
15.8153697	×ÔÉí³µÁ¾	Road 1	121.4255599	62.01238403	-0.001338853	0.87317121	0.654901981	0	149.2645	979.1846	655.7326	4.1302	0.3849	920	2.009312219	0.004641511	24.76103919	0.057198001
15.83213708	×ÔÉí³µÁ¾	Road 1	121.7145663	62.05043106	-0.001353363	0.873702526	0.654901981	0	149.5057	979.1895	655.7326	4.1297	0.3854	921	1.999025176	0.004617748	24.7945576	0.057275428
15.84870688	×ÔÉí³µÁ¾	Road 1	122.0004301	62.10753937	-0.00136347	0.873134255	0.654901981	0	149.8677	979.1982	655.7326	4.1275	0.3876	922	2.632069824	0.006080081	24.83817048	0.057376174
15.86536649	×ÔÉí³µÁ¾	Road 1	122.2880193	62.14557266	-0.001380426	0.873215497	0.654901981	0	150.1092	979.2041	655.7327	4.126	0.3891	923	2.009069187	0.00464095	24.87164079	0.05745349
15.88209465	×ÔÉí³µÁ¾	Road 1	122.5769684	62.18359909	-0.001399812	0.872926831	0.654901981	0	150.3509	979.21	655.7327	4.1245	0.3906	924	2.00486912	0.004631248	24.90517855	0.057530962
15.89879275	×ÔÉí³µÁ¾	Road 1	122.865688	62.24603577	-0.001414759	0.873181641	0.654901981	0	150.7483	979.2188	655.7327	4.1229	0.3912	925	2.794522516	0.006455347	24.95184177	0.057638754
15.91539151	×ÔÉí³µÁ¾	Road 1	123.1528653	62.28404846	-0.001429811	0.872645259	0.654901981	0	150.9904	979.2246	655.7327	4.1215	0.3927	926	2.016713958	0.004658609	24.98531672	0.057716082
15.9321193	×ÔÉí³µÁ¾	Road 1	123.4424513	62.32203369	-0.00144497	0.87212652	0.654901981	0	151.2326	979.2305	655.7327	4.12	0.3942	927	2.007366523	0.004637017	25.01889553	0.057793649
15.9486968	×ÔÉí³µÁ¾	Road 1	123.729623	62.36271744	-0.00145788	0.872030318	0.654901981	0	151.4923	979.2363	655.7328	4.1189	0.3953	928	2.107246607	0.00486774	25.05382841	0.057874344
15.96537584	×ÔÉí³µÁ¾	Road 1	124.0188299	62.42235947	-0.001463774	0.871427715	0.654901981	0	151.8735	979.2461	655.7328	4.1161	0.3982	929	2.71359629	0.006268407	25.09908859	0.057978895
15.99881676	×ÔÉí³µÁ¾	Road 1	124.5993851	62.49824066	-0.001467318	0.871218383	0.654901981	0	152.3592	979.2568	655.7328	4.1142	0.4002	930	2.010919669	0.004645224	25.16633559	0.058134235
16.01544741	×ÔÉí³µÁ¾	Road 1	124.8883788	62.55782089	-0.001469683	0.871070683	0.654901981	0	152.7412	979.2666	655.7329	4.1114	0.4027	931	2.722450772	0.006288861	25.21161172	0.058238823
16.03209199	×ÔÉí³µÁ¾	Road 1	125.1777898	62.59573059	-0.001469683	0.870722175	0.654901981	0	152.9845	979.2725	655.7329	4.1099	0.4038	932	2.018552019	0.004662855	25.24520967	0.058316434
16.04869772	×ÔÉí³µÁ¾	Road 1	125.4667874	62.65255737	-0.001469683	0.870164275	0.654901981	0	153.3497	979.2813	655.7329	4.1078	0.4059	933	2.639336135	0.006096866	25.28903777	0.058417677
16.06539142	×ÔÉí³µÁ¾	Road 1	125.7574917	62.69043274	-0.001472052	0.870703578	0.654901981	0	153.5934	979.2871	655.733	4.1064	0.4073	934	2.016409528	0.004657906	25.32269911	0.058495435
16.08212177	×ÔÉí³µÁ¾	Road 1	126.0490101	62.72828064	-0.001473237	0.869124532	0.654901981	0	153.8372	979.292	655.733	4.1059	0.4068	935	2.013862665	0.004652023	25.35639174	0.058573265
16.09871467	×ÔÉí³µÁ¾	Road 1	126.3383079	62.76612854	-0.001473237	0.869856477	0.654901981	0	154.0811	979.2979	655.733	4.1045	0.4082	936	2.025059305	0.004677887	25.38999334	0.058650885
16.11544979	×ÔÉí³µÁ¾	Road 1	126.6303868	62.83098907	-0.001475609	0.869728208	0.654901981	0	154.4996	979.3086	655.733	4.1014	0.4114	937	2.892049125	0.006680633	25.43839214	0.058762686
16.13216475	×ÔÉí³µÁ¾	Road 1	126.9222895	62.86880951	-0.001483931	0.869396448	0.654901981	0	154.744	979.3145	655.733	4.1	0.4128	938	2.017942519	0.004661447	25.47212197	0.058840602
16.14890574	×ÔÉí³µÁ¾	Road 1	127.2148226	62.90662994	-0.001485122	0.869288027	0.654901981	0	154.9885	979.3203	655.7331	4.0986	0.4143	939	2.017064525	0.004659419	25.50588962	0.058918605
16.16759864	×ÔÉí³µÁ¾	Road 1	127.5417578	62.96332626	-0.001489894	0.868320167	0.654901981	0	155.3555	979.3291	655.7331	4.0965	0.4164	940	2.439332626	0.005634858	25.55148781	0.059023937
16.18338841	×ÔÉí³µÁ¾	Road 1	127.8180955	63.00378342	-0.00150307	0.868378878	0.654901981	0	155.6179	979.335	655.7332	4.0954	0.4175	941	2.184661448	0.005046568	25.58598312	0.059103621
16.19873208	×ÔÉí³µÁ¾	Road 1	128.0867984	63.0442543	-0.001519952	0.867867947	0.654901981	0	155.8804	979.3418	655.7332	4.0933	0.4196	942	2.226932979	0.005144215	25.62015245	0.059182552
16.21545621	×ÔÉí³µÁ¾	Road 1	128.3799392	63.10088196	-0.00154062	0.867710292	0.654901981	0	156.2482	979.3506	655.7332	4.0912	0.4217	943	2.636389499	0.00609006	25.66424376	0.059284403
16.2320469	×ÔÉí³µÁ¾	Road 1	128.6709153	63.13862	-0.001572592	0.86757946	0.654901981	0	156.4936	979.3564	655.7332	4.0898	0.4222	944	2.031852913	0.00469358	25.69795361	0.059362273
16.24877579	×ÔÉí³µÁ¾	Road 1	128.9644903	63.1763443	-0.001602494	0.868114173	0.654901981	0	156.7392	979.3623	655.7333	4.0885	0.4236	945	2.022184222	0.004671246	25.73178251	0.059440418
16.26538262	×ÔÉí³µÁ¾	Road 1	129.2561842	63.23293076	-0.001635312	0.866909206	0.654901981	0	157.1078	979.3711	655.7333	4.0864	0.4257	946	2.652989289	0.006128405	25.77584024	0.059542191
16.28208329	×ÔÉí³µÁ¾	Road 1	129.5497012	63.27060699	-0.001682784	0.867034853	0.654901981	0	157.3537	979.3779	655.7333	4.084	0.4281	947	2.025264871	0.004678362	25.80966351	0.059620323
16.29870881	×ÔÉí³µÁ¾	Road 1	129.8421587	63.32715912	-0.001720628	0.867053866	0.654901981	0	157.7228	979.3867	655.7333	4.082	0.4302	948	2.653271881	0.006129058	25.85377554	0.059722221
16.31538674	×ÔÉí³µÁ¾	Road 1	130.1357252	63.36750641	-0.001755035	0.866114676	0.654901981	0	157.9867	979.3926	655.7334	4.0809	0.4313	949	2.117240668	0.004890826	25.88908675	0.05980379
16.33209731	×ÔÉí³µÁ¾	Road 1	130.4300408	63.40516205	-0.001783158	0.866419494	0.654901981	0	158.2331	979.3994	655.7334	4.0786	0.4337	950	2.027527737	0.004683589	25.92296788	0.059882056
16.34873786	×ÔÉí³µÁ¾	Road 1	130.7233843	63.46164551	-0.001811579	0.865635633	0.654901981	0	158.6031	979.4082	655.7335	4.0765	0.4358	951	2.654326151	0.006131493	25.96713732	0.059984087
16.36537621	×ÔÉí³µÁ¾	Road 1	131.0168629	63.49925995	-0.001845806	0.866170704	0.654901981	0	158.8499	979.4141	655.7335	4.0751	0.4372	952	2.034099295	0.004698769	26.00098138	0.060062267
16.38201712	×ÔÉí³µÁ¾	Road 1	131.3105731	63.53957977	-0.001887445	0.86602658	0.654901981	0	159.1144	979.4209	655.7335	4.0731	0.4382	953	2.124225219	0.00490696	26.03633043	0.060143923
16.39871559	×ÔÉí³µÁ¾	Road 1	131.6055606	63.59597397	-0.001926868	0.865041852	0.654901981	0	159.4852	979.4297	655.7335	4.071	0.4403	954	2.64990863	0.006121289	26.08057984	0.060246139
16.41543055	×ÔÉí³µÁ¾	Road 1	131.9010141	63.63356781	-0.001978357	0.865747094	0.654901981	0	159.7325	979.4355	655.7335	4.0686	0.4417	955	2.031394215	0.004692521	26.11453451	0.060324575
16.43212498	×ÔÉí³µÁ¾	Road 1	132.1962791	63.67115479	-0.002033692	0.864419103	0.654901981	0	159.9799	979.4424	655.7336	4.0662	0.4441	956	2.033712178	0.004697875	26.14848619	0.060403003
16.44879999	×ÔÉí³µÁ¾	Road 1	132.4914613	63.72748032	-0.002093045	0.864650905	0.654901981	0	160.3514	979.4512	655.7336	4.0642	0.4461	957	2.655119297	0.006133326	26.19276032	0.060505276
16.46534853	×ÔÉí³µÁ¾	Road 1	132.7845776	63.76503983	-0.002153541	0.864552498	0.654901981	0	160.5992	979.457	655.7336	4.0628	0.4475	958	2.046289527	0.004726929	26.22662343	0.0605835
16.48210345	×ÔÉí³µÁ¾	Road 1	133.0816113	63.82134476	-0.002227661	0.864031792	0.654901981	0	160.9713	979.4668	655.7337	4.0597	0.4506	959	2.649030476	0.00611926	26.27100771	0.060686028
16.49874876	×ÔÉí³µÁ¾	Road 1	133.3768754	63.85886307	-0.002293895	0.864251733	0.654901981	0	161.2195	979.4727	655.7337	4.0584	0.4519	960	2.04021463	0.004712896	26.30496772	0.060764475
16.51538125	×ÔÉí³µÁ¾	Road 1	133.6720853	63.89637451	-0.002369557	0.863746107	0.654901981	0	161.4678	979.4795	655.7338	4.056	0.4533	961	2.041969002	0.004716948	26.33893074	0.06084293
16.53206981	×ÔÉí³µÁ¾	Road 1	133.9685637	63.95530243	-0.002471885	0.863612056	0.654901981	0	161.8583	979.4893	655.7338	4.0533	0.456	962	2.748134535	0.006348191	26.38479317	0.060948872
16.54881667	×ÔÉí³µÁ¾	Road 1	134.2662519	63.99277954	-0.002568523	0.863436401	0.654901981	0	162.1071	979.4951	655.7338	4.0519	0.4573	963	2.034949698	0.004700734	26.41887217	0.061027595
16.56536631	×ÔÉí³µÁ¾	Road 1	134.5606069	64.03024979	-0.002679993	0.862915397	0.654901981	0	162.3559	979.501	655.7338	4.0506	0.4587	964	2.050487909	0.004736627	26.45280702	0.061105984
16.58201822	×ÔÉí³µÁ¾	Road 1	134.8569665	64.07039108	-0.002794643	0.863175511	0.654901981	0	162.6227	979.5078	655.7338	4.0486	0.4607	965	2.132650177	0.004926422	26.48831972	0.061188019
16.59871339	×ÔÉí³µÁ¾	Road 1	135.1542819	64.11049805	-0.002906919	0.862242639	0.654901981	0	162.8897	979.5146	655.7339	4.0465	0.4627	966	2.1291999	0.004918452	26.52386707	0.061270133
16.61539609	×ÔÉí³µÁ¾	Road 1	135.4516604	64.17200775	-0.003027907	0.862214983	0.654901981	0	163.2993	979.5254	655.7339	4.0432	0.466	967	2.842865146	0.006567018	26.57129374	0.061379689
16.63207036	×ÔÉí³µÁ¾	Road 1	135.7490618	64.20940933	-0.003177864	0.86191988	0.654901981	0	163.5489	979.5313	655.7339	4.0419	0.4663	968	2.043715536	0.004720983	26.60537122	0.061458408
16.64876883	×ÔÉí³µÁ¾	Road 1	136.047155	64.26550827	-0.003322488	0.86149323	0.654901981	0	163.9235	979.541	655.734	4.0389	0.4693	969	2.664845485	0.006155793	26.64987005	0.0615612
16.6653511	×ÔÉí³µÁ¾	Road 1	136.343346	64.30289612	-0.003469337	0.861614645	0.654901981	0	164.1734	979.5479	655.734	4.0365	0.4716	970	2.052708927	0.004741758	26.68390861	0.061639829
16.68205396	×ÔÉí³µÁ¾	Road 1	136.6418645	64.3402565	-0.003633417	0.860666871	0.654901981	0	164.4235	979.5537	655.7341	4.0352	0.4729	971	2.043764664	0.004721096	26.71804534	0.061718685
16.6987352	×ÔÉí³µÁ¾	Road 1	136.9402068	64.38564377	-0.003751521	0.861317515	0.654901981	0	164.6737	979.5605	655.7341	4.0329	0.4752	972	2.314180772	0.005345758	26.75664874	0.061807859
16.71559568	×ÔÉí³µÁ¾	Road 1	137.2419797	64.43364716	-0.003833903	0.860522807	0.654901981	0	165.0493	979.5703	655.7341	4.0299	0.4772	973	2.385918969	0.005511473	26.79687648	0.061900785
16.73206322	×ÔÉí³µÁ¾	Road 1	137.5368903	64.47098007	-0.003885717	0.860607386	0.654901981	0	165.2998	979.5771	655.7342	4.0276	0.4794	974	2.064183616	0.004768264	26.8308685	0.061979306
16.74866674	×ÔÉí³µÁ¾	Road 1	137.8345068	64.52962646	-0.003906119	0.86006856	0.654901981	0	165.6939	979.5869	655.7342	4.0249	0.482	975	2.770761105	0.006400458	26.87687291	0.062085576
16.7653993	×ÔÉí³µÁ¾	Road 1	138.1346095	64.56693192	-0.003917484	0.860085249	0.654901981	0	165.9448	979.5938	655.7343	4.0226	0.4843	976	2.045864565	0.004725947	26.91110545	0.062164654
16.7820743	×ÔÉí³µÁ¾	Road 1	138.4338527	64.60421677	-0.003917484	0.859848917	0.654901981	0	166.1959	979.5996	655.7343	4.0213	0.4856	977	2.050478335	0.004736605	26.94529719	0.062243636
16.79866757	×ÔÉí³µÁ¾	Road 1	138.7318991	64.66280823	-0.003917484	0.860293925	0.654901981	0	166.5908	979.6104	655.7343	4.0177	0.4882	978	2.775234387	0.006410791	26.99134738	0.062350012
16.815362	×ÔÉí³µÁ¾	Road 1	139.0319355	64.70007248	-0.003917484	0.858542025	0.654901981	0	166.8422	979.6172	655.7344	4.0144	0.4905	979	2.050932129	0.004737653	27.02558653	0.062429105
16.83210812	×ÔÉí³µÁ¾	Road 1	139.3330741	64.73731613	-0.003917484	0.859644234	0.654901981	0	167.0938	979.624	655.7344	4.0121	0.4927	980	2.047399354	0.004729493	27.05987252	0.062508306
16.84873071	×ÔÉí³µÁ¾	Road 1	139.6321756	64.7772377	-0.003917484	0.858549774	0.654901981	0	167.3636	979.6309	655.7344	4.0102	0.4947	981	2.147857908	0.004961552	27.09557548	0.062590779
16.86534926	×ÔÉí³µÁ¾	Road 1	139.9314868	64.83839035	-0.003917484	0.858526051	0.654901981	0	167.7775	979.6416	655.7345	4.0069	0.4969	982	2.865224499	0.006618669	27.14319137	0.062700772
16.88200191	×ÔÉí³µÁ¾	Road 1	140.231584	64.87557907	-0.003917484	0.858039618	0.654901981	0	168.0296	979.6484	655.7345	4.0046	0.4992	983	2.056280673	0.004750008	27.17743389	0.062779872
16.89869158	×ÔÉí³µÁ¾	Road 1	140.5325209	64.91278152	-0.003917484	0.858974636	0.654901981	0	168.2819	979.6553	655.7346	4.0024	0.5014	984	2.05497115	0.004746983	27.21173067	0.062859098
16.91534936	×ÔÉí³µÁ¾	Road 1	140.8331532	64.97122192	-0.003917484	0.857757568	0.654901981	0	168.6786	979.666	655.7346	3.9988	0.504	985	2.774282254	0.006408592	27.25794405	0.062965851
16.93200383	×ÔÉí³µÁ¾	Road 1	141.1338979	65.00839005	-0.003917484	0.857635736	0.654901981	0	168.9313	979.6729	655.7346	3.9965	0.5062	986	2.0590443	0.004756392	27.29223636	0.063045066
16.94869937	×ÔÉí³µÁ¾	Road 1	141.4355563	65.04555817	-0.003917484	0.857321441	0.654901981	0	169.1841	979.6797	655.7347	3.9943	0.5085	987	2.056966298	0.004751592	27.32657851	0.063124396
16.96534285	×ÔÉí³µÁ¾	Road 1	141.736544	65.10392303	-0.003917484	0.857130766	0.654901981	0	169.5816	979.6904	655.7347	3.9908	0.511	988	2.778481338	0.006418292	27.37282211	0.063231219
16.98246065	×ÔÉí³µÁ¾	Road 1	142.0462863	65.14107742	-0.003917484	0.857270658	0.654901981	0	169.8348	979.6973	655.7347	3.9885	0.5132	989	2.028188381	0.004685115	27.40754025	0.063311418
16.99874015	×ÔÉí³µÁ¾	Road 1	142.3410393	65.18082733	-0.003917484	0.855699778	0.654901981	0	170.1062	979.7051	655.7348	3.9856	0.5161	990	2.181939947	0.005040281	27.44306112	0.063393471
17.01532315	×ÔÉí³µÁ¾	Road 1	142.641544	65.23648682	-0.003917484	0.856355011	0.654901981	0	170.4864	979.7158	655.7349	3.9818	0.52	991	2.698842668	0.006234327	27.48781603	0.063496855
17.03201391	×ÔÉí³µÁ¾	Road 1	142.9441734	65.27357254	-0.003917484	0.856074929	0.654901981	0	170.7401	979.7227	655.7349	3.9796	0.5212	992	2.060701774	0.004760221	27.52221072	0.063576307
17.04873547	×ÔÉí³µÁ¾	Road 1	143.2475334	65.31066513	-0.003917484	0.856364906	0.654901981	0	170.9939	979.7295	655.7349	3.9774	0.5234	993	2.059625562	0.004757735	27.55665087	0.063655864
17.06539545	×ÔÉí³µÁ¾	Road 1	143.5500458	65.3689064	-0.003917484	0.855160415	0.654901981	0	171.3931	979.7412	655.735	3.9719	0.5279	994	2.782424975	0.006427402	27.60300601	0.063762944
17.08201107	×ÔÉí³µÁ¾	Road 1	143.851936	65.40860825	-0.003917484	0.855671167	0.654901981	0	171.6654	979.748	655.735	3.97	0.5288	995	2.158971	0.004987223	27.63887866	0.06384581
17.09867582	×ÔÉí³µÁ¾	Road 1	144.15489	65.44562531	-0.003917484	0.854931295	0.654901981	0	171.9198	979.7559	655.7351	3.9668	0.532	996	2.064976641	0.004770096	27.67329096	0.063925302
17.11533469	×ÔÉí³µÁ¾	Road 1	144.4579946	65.50118866	-0.003917484	0.854776144	0.654901981	0	172.3016	979.7666	655.7351	3.963	0.5358	997	2.696665684	0.006229298	27.71821439	0.064029075
17.1320053	×ÔÉí³µÁ¾	Road 1	144.761496	65.54082184	-0.003917484	0.854256809	0.654901981	0	172.5744	979.7734	655.7352	3.9611	0.5377	998	2.155935523	0.004980211	27.75415514	0.064112098
17.14866674	×ÔÉí³µÁ¾	Road 1	145.0650141	65.58046188	-0.003917484	0.854707897	0.654901981	0	172.8475	979.7813	655.7352	3.9583	0.5396	999	2.158032542	0.004985055	27.79011108	0.064195157
17.16535421	×ÔÉí³µÁ¾	Road 1	145.3691777	65.61743088	-0.003917484	0.854035974	0.654901981	0	173.1025	979.7891	655.7352	3.9551	0.5428	1000	2.066263563	0.004773069	27.82459179	0.064274807
17.18200869	×ÔÉí³µÁ¾	Road 1	145.673021	65.67818527	-0.003917484	0.854252815	0.654901981	0	173.5218	979.8008	655.7354	3.951	0.5469	1001	2.880399306	0.006653722	27.87256333	0.064385621
17.19879146	×ÔÉí³µÁ¾	Road 1	145.9793772	65.71514053	-0.003917484	0.853754401	0.654901981	0	173.7772	979.8086	655.7354	3.9478	0.5491	1002	2.0612872	0.004761573	27.90715745	0.064465534
17.21532461	×ÔÉí³µÁ¾	Road 1	146.2813464	65.75208206	-0.003917484	0.853854656	0.654901981	0	174.0327	979.8154	655.7354	3.9456	0.5513	1003	2.080691999	0.004806399	27.94155784	0.064544999
17.2320568	×ÔÉí³µÁ¾	Road 1	146.5871471	65.79430389	-0.003917484	0.853275478	0.654901981	0	174.3066	979.8232	655.7355	3.9428	0.5542	1004	2.246054194	0.005188385	27.97913924	0.064631812
17.24873731	×ÔÉí³µÁ¾	Road 1	146.8922598	65.84966812	-0.003917484	0.853341639	0.654901981	0	174.7087	979.835	655.7355	3.9384	0.5577	1005	2.700173141	0.0062374	28.02417949	0.064735855
17.26540058	×ÔÉí³µÁ¾	Road 1	147.1972404	65.88921204	-0.003917484	0.852822185	0.654901981	0	174.9831	979.8428	655.7356	3.9356	0.5605	1006	2.163350076	0.004997339	28.06022799	0.064819127
17.28199861	×ÔÉí³µÁ¾	Road 1	147.5012089	65.92871475	-0.003917484	0.852713406	0.654901981	0	175.2576	979.8506	655.7356	3.9327	0.5634	1007	2.168367592	0.005008929	28.09621862	0.064902265
17.29872787	×ÔÉí³µÁ¾	Road 1	147.8078501	65.98668137	-0.003917484	0.852539361	0.654901981	0	175.6605	979.8623	655.7357	3.9274	0.5678	1008	2.788287554	0.006440944	28.1428646	0.065010017
17.31539004	×ÔÉí³µÁ¾	Road 1	148.1134322	66.02352676	-0.003917484	0.85222435	0.654901981	0	175.9171	979.8701	655.7357	3.9242	0.57	1009	2.074885065	0.004792985	28.1774367	0.065089879
17.3320229	×ÔÉí³µÁ¾	Road 1	148.4186468	66.06038589	-0.003917484	0.852099657	0.654901981	0	176.1738	979.8779	655.7358	3.9211	0.5732	1010	2.07857232	0.004801502	28.21200928	0.065169741
17.34872503	×ÔÉí³µÁ¾	Road 1	148.7253158	66.09985428	-0.003917484	0.851175308	0.654901981	0	176.449	979.8857	655.7358	3.9182	0.576	1011	2.163573975	0.004997856	28.24814558	0.065253216
17.3654059	×ÔÉí³µÁ¾	Road 1	149.0318747	66.16034088	-0.003917484	0.851807535	0.654901981	0	176.8713	979.8984	655.7359	3.9132	0.5801	1012	2.886880593	0.006668694	28.29630126	0.065364456
17.38207577	×ÔÉí³µÁ¾	Road 1	149.338402	66.19715881	-0.003917484	0.850887418	0.654901981	0	177.1286	979.9053	655.736	3.911	0.5823	1013	2.078027635	0.004800244	28.33094172	0.065444475
17.39872658	×ÔÉí³µÁ¾	Road 1	149.644749	66.23394241	-0.003917484	0.850777388	0.654901981	0	177.386	979.9131	655.736	3.9079	0.5855	1014	2.079283063	0.004803144	28.36556347	0.065524452
17.41532828	×ÔÉí³µÁ¾	Road 1	149.9504588	66.2917511	-0.003917484	0.850383639	0.654901981	0	177.7908	979.9258	655.7361	3.9026	0.5899	1015	2.809596217	0.006490167	28.41220753	0.065632199
17.43202198	×ÔÉí³µÁ¾	Road 1	150.2580333	66.3285141	-0.003917484	0.850494027	0.654901981	0	178.0485	979.9336	655.7361	3.8994	0.593	1016	2.077864915	0.004799868	28.44689479	0.065712327
17.44867059	×ÔÉí³µÁ¾	Road 1	150.5649472	66.3652771	-0.003917484	0.850394428	0.654901981	0	178.3064	979.9404	655.7361	3.8973	0.5952	1017	2.082269978	0.004810044	28.48156169	0.065792408
17.46538005	×ÔÉí³µÁ¾	Road 1	150.8732508	66.42301712	-0.003917484	0.849800408	0.654901981	0	178.712	979.9531	655.7362	3.892	0.6006	1018	2.799324731	0.00646644	28.5283369	0.065900458
17.48207705	×ÔÉí³µÁ¾	Road 1	151.1815069	66.46236877	-0.003917484	0.849691391	0.654901981	0	178.9887	979.9619	655.7363	3.8882	0.6034	1019	2.170200653	0.005013164	28.56457274	0.065984163
17.49871101	×ÔÉí³µÁ¾	Road 1	151.4887687	66.49908371	-0.003917484	0.849601984	0.654901981	0	179.2471	979.9697	655.7363	3.8851	0.6065	1020	2.085322714	0.004817095	28.5992599	0.06606429
17.51534459	×ÔÉí³µÁ¾	Road 1	151.7962781	66.55413208	-0.003917484	0.849423349	0.654901981	0	179.635	979.9814	655.7365	3.8804	0.6112	1021	2.720328741	0.006283959	28.64450872	0.066168815
17.53199577	×ÔÉí³µÁ¾	Road 1	152.1042825	66.59082642	-0.003917484	0.849329591	0.654901981	0	179.8938	979.9893	655.7365	3.8773	0.6134	1022	2.08576085	0.004818108	28.6792391	0.066249042
17.54869057	×ÔÉí³µÁ¾	Road 1	152.4132638	66.62749329	-0.003917484	0.848569512	0.654901981	0	180.1527	979.9971	655.7365	3.8732	0.6165	1023	2.082483161	0.004810536	28.71400574	0.066329353
17.56535605	×ÔÉí³µÁ¾	Road 1	152.7219207	66.67464523	-0.003917484	0.848451555	0.654901981	0	180.4488	980.0059	655.7366	3.8698	0.6199	1024	2.448259565	0.00565548	28.75480715	0.066423605
17.58199293	×ÔÉí³µÁ¾	Road 1	153.0302777	66.72435837	-0.003917484	0.848306954	0.654901981	0	180.8377	980.0176	655.7366	3.8651	0.6246	1025	2.541370229	0.005870565	28.79708763	0.066521272
17.59872365	×ÔÉí³µÁ¾	Road 1	153.3405444	66.76101151	-0.003917484	0.848577619	0.654901981	0	181.0972	980.0254	655.7367	3.862	0.6268	1026	2.082862605	0.004811413	28.83193542	0.066601771
17.61537117	×ÔÉí³µÁ¾	Road 1	153.6494857	66.80810165	-0.003917484	0.847898602	0.654901981	0	181.3567	980.0342	655.7368	3.858	0.6309	1027	2.452180782	0.005664538	28.87275814	0.066696071
17.63205204	×ÔÉí³µÁ¾	Road 1	153.9592641	66.85515747	-0.003917484	0.847483993	0.654901981	0	181.7649	980.0469	655.7368	3.8527	0.6362	1028	2.449241839	0.005657749	28.91361362	0.066790447
17.64872961	×ÔÉí³µÁ¾	Road 1	154.2691629	66.89437866	-0.003917484	0.847395539	0.654901981	0	182.0249	980.0547	655.7369	3.8496	0.6383	1029	2.179426736	0.005034476	28.94996117	0.06687441
17.66533497	×ÔÉí³µÁ¾	Road 1	154.5779609	66.94662552	-0.003917484	0.847211421	0.654901981	0	182.4151	980.0664	655.7369	3.845	0.643	1030	2.64033013	0.006099163	28.9938048	0.066975689
17.68198798	×ÔÉí³µÁ¾	Road 1	154.8878143	66.98320313	-0.003917484	0.846710443	0.654901981	0	182.6753	980.0752	655.7371	3.8409	0.6471	1031	2.092089522	0.004832727	29.0286444	0.067056169
17.698722	×ÔÉí³µÁ¾	Road 1	155.1993448	67.0197464	-0.003917484	0.846200645	0.654901981	0	182.9358	980.083	655.7371	3.8378	0.6492	1032	2.085723012	0.00481802	29.06354693	0.067136793
17.71536805	×ÔÉí³µÁ¾	Road 1	155.5095032	67.0771843	-0.003917484	0.846407115	0.654901981	0	183.3453	980.0957	655.7372	3.8326	0.6544	1033	2.821063389	0.006516656	29.11050649	0.06724527
17.7654004	×ÔÉí³µÁ¾	Road 1	156.4435085	67.20490723	-0.003917484	0.845235288	0.654901981	0	184.2588	980.125	655.7374	3.8199	0.6661	1034	2.303923269	0.005322063	29.22577718	0.067511545
17.78200099	×ÔÉí³µÁ¾	Road 1	156.753577	67.24136124	-0.003917484	0.844709992	0.654901981	0	184.5201	980.1338	655.7374	3.8148	0.6702	1035	2.098702697	0.004848003	29.26061689	0.067592025
17.79940765	×ÔÉí³µÁ¾	Road 1	157.0789652	67.29595642	-0.003917484	0.843528867	0.654901981	0	184.9123	980.1455	655.7375	3.8102	0.6748	1036	2.646741336	0.006113972	29.3066878	0.067698449
17.81530225	×ÔÉí³µÁ¾	Road 1	157.3762603	67.33493729	-0.003906119	0.843397319	0.654901981	0	185.1926	980.1553	655.7375	3.8056	0.6785	1037	2.250405518	0.005198437	29.34245711	0.067781076
17.83204727	×ÔÉí³µÁ¾	Road 1	157.6896308	67.3713089	-0.003906119	0.843284667	0.654901981	0	185.4544	980.1631	655.7376	3.8025	0.6815	1038	2.088291959	0.004823954	29.3774256	0.067861853
17.84869992	×ÔÉí³µÁ¾	Road 1	158.0015369	67.42843781	-0.003903848	0.843090951	0.654901981	0	185.8661	980.1768	655.7377	3.7963	0.6877	1039	2.822670134	0.006520368	29.42443052	0.067970435
17.86545557	×ÔÉí³µÁ¾	Road 1	158.3155535	67.46738434	-0.003903848	0.842992306	0.654901981	0	186.147	980.1855	655.7378	3.7926	0.6904	1040	2.179589715	0.005034852	29.46095096	0.068054797
17.88208622	×ÔÉí³µÁ¾	Road 1	158.6273953	67.50369415	-0.003883455	0.84292537	0.654901981	0	186.4093	980.1943	655.7379	3.7886	0.6944	1041	2.098351439	0.004847192	29.49584791	0.068135409
17.89870624	×ÔÉí³µÁ¾	Road 1	158.9392893	67.55819321	-0.003856374	0.84271872	0.654901981	0	186.803	980.207	655.7379	3.7831	0.7	1042	2.739149713	0.006327436	29.54137264	0.068240571
17.9153094	×ÔÉí³µÁ¾	Road 1	159.2510465	67.59710541	-0.003827179	0.842870355	0.654901981	0	187.0844	980.2158	655.7379	3.7794	0.7036	1043	2.194464265	0.005069212	29.57780769	0.068324736
17.93200713	×ÔÉí³µÁ¾	Road 1	159.5647599	67.63602448	-0.00378033	0.842577159	0.654901981	0	187.366	980.2256	655.7379	3.7747	0.7073	1044	2.188038989	0.00505437	29.61434298	0.068409132
17.94866344	×ÔÉí³µÁ¾	Road 1	159.8778632	67.67236176	-0.003722858	0.843177378	0.654901981	0	187.629	980.2344	655.7377	3.7707	0.7113	1045	2.101843125	0.004855258	29.64935193	0.068490003
17.96538977	×ÔÉí³µÁ¾	Road 1	160.1925362	67.72695007	-0.003663795	0.844802201	0.654901981	0	188.0237	980.2471	655.7374	3.7652	0.7168	1046	2.73617299	0.00632056	29.69511804	0.068595723
17.98200539	×ÔÉí³µÁ¾	Road 1	160.5052948	67.76339035	-0.003571027	0.845668077	0.654901981	0	188.287	980.2559	655.7371	3.7612	0.7199	1047	2.111023041	0.004876463	29.73019401	0.068676748
17.99867233	×ÔÉí³µÁ¾	Road 1	160.8192731	67.81818466	-0.003475635	0.84839195	0.654901981	0	188.6823	980.2686	655.7365	3.7557	0.7254	1048	2.753505718	0.006360598	29.77608653	0.06878276
18.01534917	×ÔÉí³µÁ¾	Road 1	161.1336076	67.8548378	-0.003377833	0.849990129	0.654901981	0	188.9459	980.2773	655.7359	3.7507	0.7294	1049	2.116228786	0.004888488	29.81137853	0.068864284
18.03201318	×ÔÉí³µÁ¾	Road 1	161.4478704	67.8916008	-0.003255669	0.852580845	0.654901981	0	189.2097	980.2861	655.7354	3.7467	0.7334	1050	2.122071553	0.004901985	29.84674075	0.068945971
18.04871348	×ÔÉí³µÁ¾	Road 1	161.7630742	67.94691696	-0.003136487	0.855299115	0.654901981	0	189.6057	980.2998	655.7344	3.7402	0.7389	1051	2.772643948	0.006404808	29.89304473	0.069052933
18.06536832	×ÔÉí³µÁ¾	Road 1	162.0776036	67.98655701	-0.003018336	0.859233499	0.654901981	0	189.8888	980.3086	655.7335	3.7366	0.7425	1052	2.226770843	0.005143841	29.93013126	0.069138603
18.08206679	×ÔÉí³µÁ¾	Road 1	162.3931293	68.02376633	-0.002871631	0.861407578	0.654901981	0	190.1531	980.3174	655.7328	3.7326	0.7465	1053	2.13864782	0.004940276	29.9658434	0.069221098
18.09868021	×ÔÉí³µÁ¾	Road 1	162.7073062	68.07970047	-0.002733337	0.864536464	0.654901981	0	190.5498	980.3311	655.7314	3.7261	0.752	1054	2.809530905	0.006490016	30.01251932	0.06932892
18.11536072	×ÔÉí³µÁ¾	Road 1	163.0229251	68.11712952	-0.00259091	0.867806911	0.654901981	0	190.8145	980.3398	655.7303	3.7221	0.756	1055	2.150333986	0.004967272	30.04838798	0.069411776
18.13206395	×ÔÉí³µÁ¾	Road 1	163.3391484	68.15472336	-0.002430276	0.869185269	0.654901981	0	191.0793	980.3486	655.7292	3.7181	0.7599	1056	2.155365491	0.004978894	30.08438955	0.06949494
18.14866528	×ÔÉí³µÁ¾	Road 1	163.6537158	68.213974	-0.002292303	0.871818662	0.654901981	0	191.4958	980.3633	655.7274	3.711	0.767	1057	2.933595094	0.006776605	30.13309112	0.06960744
18.16538794	×ÔÉí³µÁ¾	Road 1	163.970758	68.25181503	-0.002161184	0.875541151	0.654901981	0	191.761	980.3721	655.7262	3.7071	0.77	1058	2.165181287	0.005001569	30.16929871	0.06969108
18.1820787	×ÔÉí³µÁ¾	Road 1	164.2874599	68.30884094	-0.002030754	0.878633499	0.654901981	0	192.0264	980.3809	655.7249	3.7006	0.7764	1059	2.847355966	0.006577392	30.21682326	0.069800862
18.19867343	×ÔÉí³µÁ¾	Road 1	164.6025155	68.3470047	-0.001921203	0.882760584	0.662745118	0	192.4247	980.3945	655.7227	3.6967	0.7804	1060	2.189564062	0.005057893	30.25315849	0.069884796
18.21540452	×ÔÉí³µÁ¾	Road 1	164.920338	68.38532639	-0.001822486	0.887407184	0.662745118	0	192.6904	980.4033	655.7212	3.6927	0.7844	1061	2.185125297	0.005047639	30.28971801	0.069969249
18.23210152	×ÔÉí³µÁ¾	Road 1	165.2377951	68.44617004	-0.001736451	0.893452585	0.662745118	0	193.1083	980.417	655.7186	3.6866	0.7895	1062	2.986856606	0.006899639	30.33958956	0.070084452
18.24866839	×ÔÉí³µÁ¾	Road 1	165.5529576	68.48515778	-0.001672443	0.899420857	0.662745118	0	193.3744	980.4268	655.717	3.6817	0.7944	1063	2.225092128	0.005139963	30.37645237	0.070169605
18.26532544	×ÔÉí³µÁ¾	Road 1	165.8700166	68.5243103	-0.001627699	0.903017879	0.662745118	0	193.6406	980.4355	655.7152	3.6777	0.7984	1064	2.224506087	0.005138609	30.41350607	0.070255199
18.2831276	×ÔÉí³µÁ¾	Road 1	166.2091644	68.58333435	-0.001587496	0.906932116	0.662745118	0	194.0403	980.4492	655.7124	3.6713	0.8048	1065	2.797694378	0.006462674	30.46331109	0.070370249
18.29865785	×ÔÉí³µÁ¾	Road 1	166.5052005	68.62284393	-0.001555322	0.910373211	0.662745118	0	194.307	980.458	655.7104	3.6674	0.8087	1066	2.342008673	0.00541004	30.49968307	0.070454268
18.31534606	×ÔÉí³µÁ¾	Road 1	166.8235062	68.66532669	-0.001529655	0.912528038	0.662745118	0	194.5928	980.4678	655.7083	3.6618	0.8133	1067	2.344210912	0.005415127	30.53880374	0.070544637
18.33208008	×ÔÉí³µÁ¾	Road 1	167.1429637	68.72506485	-0.00151029	0.917304158	0.662745118	0	194.9933	980.4814	655.7051	3.6554	0.8187	1068	2.953820793	0.006823326	30.58823304	0.070658818
18.34871183	×ÔÉí³µÁ¾	Road 1	167.4606535	68.76504822	-0.001499469	0.919716299	0.662745118	0	195.2605	980.4912	655.7028	3.6505	0.8236	1069	2.263061737	0.005227673	30.62587172	0.070745764
18.36539087	×ÔÉí³µÁ¾	Road 1	167.7794322	68.80512772	-0.001489894	0.922300577	0.662745118	0	195.5279	980.5	655.7006	3.6466	0.8276	1070	2.263579794	0.005228869	30.66362605	0.070832976
18.38206294	×ÔÉí³µÁ¾	Road 1	168.0982904	68.85105057	-0.001483931	0.925143301	0.662745118	0	195.7954	980.5088	655.6981	3.6426	0.8315	1071	2.473900736	0.005714711	30.70487111	0.070928252
18.39864961	×ÔÉí³µÁ¾	Road 1	168.4157414	68.90013885	-0.001473237	0.928855896	0.662745118	0	196.1587	980.5215	655.6948	3.6365	0.8376	1072	2.59744887	0.006000107	30.74795412	0.071027774
18.41532865	×ÔÉí³µÁ¾	Road 1	168.735269	68.96676407	-0.001463774	0.932303011	0.662745118	0	196.5989	980.5371	655.6906	3.6289	0.8452	1073	3.216044892	0.007429064	30.80159466	0.071151684
18.4320524	×ÔÉí³µÁ¾	Road 1	169.0558424	69.00746841	-0.001448484	0.935151219	0.662745118	0	196.867	980.5459	655.6879	3.625	0.8491	1074	2.287793278	0.005284802	30.83985516	0.071240065
18.44864897	×ÔÉí³µÁ¾	Road 1	169.3741524	69.04539185	-0.001424009	0.936680019	0.662745118	0	197.1161	980.5547	655.6854	3.6207	0.8534	1075	2.200088923	0.005082205	30.87636907	0.071324413
18.46750681	×ÔÉí³µÁ¾	Road 1	169.736154	69.10679855	-0.001382697	0.940825224	0.662745118	0	197.5189	980.5684	655.6812	3.6142	0.8588	1076	2.781355118	0.00642493	30.92881944	0.071445573
18.48389041	×ÔÉí³µÁ¾	Road 1	170.0508458	69.14787369	-0.001344422	0.943466604	0.662745118	0	197.7876	980.5781	655.6782	3.6091	0.8637	1077	2.335543818	0.005395106	30.96708404	0.071533964
18.49868975	×ÔÉí³µÁ¾	Road 1	170.3353621	69.20976105	-0.001289427	0.947589874	0.662745118	0	198.1909	980.5918	655.6737	3.6026	0.87	1078	3.338331592	0.007711546	31.01648914	0.07164809
18.5153182	×ÔÉí³µÁ¾	Road 1	170.6552343	69.2511795	-0.001237008	0.949728906	0.662745118	0	198.46	980.6006	655.6705	3.5985	0.8739	1079	2.328847076	0.005379637	31.05521427	0.071737545
18.53205185	×ÔÉí³µÁ¾	Road 1	170.977323	69.29265289	-0.0011758	0.951956749	0.662745118	0	198.7292	980.6104	655.6674	3.5935	0.8788	1080	2.322652564	0.005365327	31.09408073	0.071827326
18.54865795	×ÔÉí³µÁ¾	Road 1	171.2971624	69.33729858	-0.001120592	0.95476234	0.662745118	0	199.0179	980.6201	655.6638	3.589	0.8833	1081	2.449758369	0.005658942	31.13476165	0.071921299
18.56531792	×ÔÉí³µÁ¾	Road 1	171.6183434	69.40296936	-0.001062366	0.958245397	0.662745118	0	199.4416	980.6348	655.6586	3.5822	0.8903	1082	3.202907439	0.007398716	31.18812201	0.072044562
18.58206367	×ÔÉí³µÁ¾	Road 1	171.9413731	69.44487534	-0.00100252	0.961092234	0.662745118	0	199.7114	980.6445	655.655	3.5775	0.8951	1083	2.341516701	0.005408904	31.22733247	0.072135138
18.59869213	×ÔÉí³µÁ¾	Road 1	172.2623344	69.48697357	-0.000947612	0.963050604	0.662745118	0	199.9814	980.6533	655.6515	3.5737	0.899	1084	2.360290801	0.005452272	31.26658045	0.072225801
18.61530445	×ÔÉí³µÁ¾	Road 1	172.5832903	69.5532486	-0.0008973	0.967611194	0.662745118	0	200.4061	980.668	655.6458	3.5669	0.905	1085	3.237831343	0.00747939	31.32036836	0.072350051
18.63206303	×ÔÉí³µÁ¾	Road 1	172.907269	69.59559402	-0.000842251	0.969591439	0.662745118	0	200.6765	980.6777	655.6421	3.5621	0.9098	1086	2.360558431	0.00545289	31.35992797	0.072441434
18.64873694	×ÔÉí³µÁ¾	Road 1	173.2299063	69.65939026	-0.000796561	0.97289151	0.662745118	0	201.0825	980.6914	655.6363	3.5558	0.9161	1087	3.144039866	0.007262732	31.41235139	0.072562532
18.66530601	×ÔÉí³µÁ¾	Road 1	173.5507111	69.70201035	-0.000745757	0.975507557	0.662745118	0	201.3533	980.7012	655.6324	3.5509	0.921	1088	2.39109207	0.005523423	31.45196957	0.07265405
18.68204846	×ÔÉí³µÁ¾	Road 1	173.8750718	69.74477463	-0.000688558	0.97848469	0.662745118	0	201.6243	980.7109	655.6284	3.5461	0.9258	1089	2.381512628	0.005501294	31.49184193	0.072746155
18.69871724	×ÔÉí³µÁ¾	Road 1	174.1983175	69.81223068	-0.000634361	0.982212901	0.662745118	0	202.0505	980.7256	655.6219	3.5391	0.9327	1090	3.283332993	0.007584499	31.54657107	0.072872579
18.71535265	×ÔÉí³µÁ¾	Road 1	174.5211153	69.85531082	-0.000581809	0.984365404	0.662745118	0	202.322	980.7354	655.6177	3.5343	0.9375	1091	2.406185648	0.005558289	31.58659897	0.072965044
18.73206945	×ÔÉí³µÁ¾	Road 1	174.8456927	69.89847336	-0.000523868	0.98716557	0.662745118	0	202.5936	980.7441	655.6133	3.5304	0.9413	1092	2.402850359	0.005550584	31.62676692	0.073057832
18.74863999	×ÔÉí³µÁ¾	Road 1	175.1676297	69.94180069	-0.000472125	0.98977977	0.662745118	0	202.8654	980.7539	655.609	3.5256	0.9462	1093	2.42393196	0.005599283	31.66693278	0.073150615
18.76530363	×ÔÉí³µÁ¾	Road 1	175.4917059	70.01316376	-0.000420814	0.993485272	0.662745118	0	203.3122	980.7695	655.6016	3.518	0.9538	1094	3.434398566	0.007933461	31.72416237	0.073282815
18.78199989	×ÔÉí³µÁ¾	Road 1	175.8166188	70.05677261	-0.000364882	0.996293068	0.662745118	0	203.5845	980.7793	655.597	3.5132	0.9587	1095	2.42570919	0.005603388	31.76466265	0.073376371
18.79868626	×ÔÉí³µÁ¾	Road 1	176.1416435	70.12244339	-0.000314987	1.000365138	0.662745118	0	203.9931	980.793	655.5901	3.5069	0.965	1096	3.229235987	0.007459535	31.81854688	0.073500843
18.83205607	×ÔÉí³µÁ¾	Road 1	176.7924516	70.21045074	-0.000270244	1.00717628	0.670588255	0	204.5386	980.8125	655.5804	3.4973	0.9747	1097	2.445299755	0.005648642	31.90014606	0.073689337
18.88209538	×ÔÉí³µÁ¾	Road 1	177.7703525	70.35354767	-0.000224159	1.021617889	0.670588255	0	205.3777	980.8418	655.565	3.4832	0.9878	1098	2.584099341	0.005969269	32.02945261	0.073988036
18.89864869	×ÔÉí³µÁ¾	Road 1	178.094234	70.43749008	-0.000151938	1.027799368	0.670588255	0	205.925	980.8604	655.5546	3.4745	0.9964	1099	3.932843532	0.009084869	32.09455419	0.07413842
18.91526028	×ÔÉí³µÁ¾	Road 1	178.4194648	70.48276062	-6.50E-05	1.030367017	0.670588255	0	206.1989	980.8701	655.5492	3.4697	1.0013	1100	2.507636543	0.00579264	32.13621002	0.074234645
18.9325511	×ÔÉí³µÁ¾	Road 1	178.7583211	70.55087585	-4.33E-05	1.03593421	0.670588255	0	206.61	980.8848	655.5411	3.4625	1.0085	1101	3.249409681	0.007506136	32.19239498	0.074364432
18.94860956	×ÔÉí³µÁ¾	Road 1	179.0732299	70.59654465	-2.87E-05	1.037468076	0.670588255	0	206.8844	980.8936	655.5355	3.4587	1.0123	1102	2.583573643	0.005968055	32.23388319	0.07446027
18.96526697	×ÔÉí³µÁ¾	Road 1	179.4000957	70.64225464	-1.63E-05	1.040694356	0.670588255	0	207.1589	980.9033	655.5299	3.4539	1.0171	1103	2.524153862	0.005830795	32.27592906	0.074557396
18.98200576	×ÔÉí³µÁ¾	Road 1	179.7287718	70.68815689	-8.92E-06	1.043242812	0.670588255	0	207.4336	980.9131	655.5243	3.4491	1.0219	1104	2.524464582	0.005831513	32.31818553	0.074655009
18.99865181	×ÔÉí³µÁ¾	Road 1	180.0559766	70.76377029	-4.05E-06	1.047574162	0.670588255	0	207.8853	980.9287	655.5147	3.4417	1.0293	1105	3.626768929	0.008377836	32.3785569	0.074794466
19.01535284	×ÔÉí³µÁ¾	Road 1	180.3844766	70.810009	-1.41E-06	1.049288154	0.670588255	0	208.1605	980.9385	655.5088	3.4369	1.0341	1106	2.544412414	0.005877593	32.42105121	0.074892628
19.03219573	×ÔÉí³µÁ¾	Road 1	180.7160919	70.87947693	-1.96E-07	1.054030895	0.670588255	0	208.5736	980.9531	655.4998	3.4297	1.0413	1107	3.376441957	0.007799581	32.47792025	0.075023996
19.04862147	×ÔÉí³µÁ¾	Road 1	181.0397065	70.92599716	-9.76E-10	1.056606054	0.670588255	0	208.8492	980.9629	655.4937	3.425	1.046	1108	2.587019333	0.005976015	32.52041397	0.075122156
19.06540828	×ÔÉí³µÁ¾	Road 1	181.3706676	70.97596436	3.94E-08	1.05877769	0.670588255	0	209.1447	980.9727	655.487	3.4205	1.0504	1109	2.677142255	0.006184199	32.56535464	0.075225969
19.08254808	×ÔÉí³µÁ¾	Road 1	181.708922	71.04611206	4.91E-07	1.061932683	0.670588255	0	209.5588	980.9873	655.4775	3.4134	1.0576	1110	3.364158614	0.007771206	32.62301564	0.075359166
19.09860434	×ÔÉí³µÁ¾	Road 1	182.0260023	71.09307861	1.59E-06	1.06477797	0.670588255	0	209.8351	980.9971	655.4711	3.4086	1.0624	1111	2.649503919	0.006120354	32.66555676	0.075457436
19.11534606	×ÔÉí³µÁ¾	Road 1	182.3568377	71.14010696	4.05E-06	1.067792892	0.670588255	0	210.1116	981.0068	655.4647	3.4039	1.0671	1112	2.579720828	0.005959155	32.70874573	0.075557203
19.13203023	×ÔÉí³µÁ¾	Road 1	182.6867546	71.18727264	7.57E-06	1.070147157	0.670588255	0	210.3882	981.0166	655.4581	3.3992	1.0719	1113	2.592251982	0.005988102	32.7519953	0.075657109
19.14860663	×ÔÉí³µÁ¾	Road 1	183.0149138	71.26837921	1.25E-05	1.07490766	0.670588255	0	210.8629	981.0332	655.4467	3.3912	1.0799	1114	3.866125748	0.00893075	32.81608175	0.075805149
19.1652875	×ÔÉí³µÁ¾	Road 1	183.3453611	71.31583328	1.93E-05	1.077040792	0.670588255	0	211.1401	981.043	655.4398	3.3865	1.0846	1115	2.607385321	0.00602306	32.85957521	0.075905619
19.18203105	×ÔÉí³µÁ¾	Road 1	183.6772713	71.36339722	2.85E-05	1.080044627	0.670588255	0	211.4174	981.0518	655.4329	3.3827	1.0884	1116	2.606402748	0.00602079	32.90321565	0.076006428
19.19867563	×ÔÉí³µÁ¾	Road 1	184.007551	71.43507614	3.74E-05	1.082854509	0.670588255	0	211.8338	981.0664	655.4225	3.3756	1.0955	1117	3.512811916	0.008114596	32.96168493	0.076141492
19.21529382	×ÔÉí³µÁ¾	Road 1	184.3375279	71.48292847	4.66E-05	1.085858583	0.670588255	0	212.1116	981.0762	655.4154	3.3709	1.1002	1118	2.63421396	0.006085034	33.0054608	0.076242614
19.23199815	×ÔÉí³µÁ¾	Road 1	184.6695175	71.54807739	5.75E-05	1.089285612	0.670588255	0	212.3896	981.0859	655.4082	3.3662	1.105	1119	3.266897754	0.007546534	33.06003214	0.076368674
19.24861378	×ÔÉí³µÁ¾	Road 1	184.9999987	71.60321503	6.60E-05	1.092520118	0.670588255	0	212.807	981.1006	655.3972	3.3591	1.112	1120	2.909539672	0.006721037	33.10837596	0.076480348
19.26528108	×ÔÉí³µÁ¾	Road 1	185.3317315	71.6515274	7.35E-05	1.095077872	0.670588255	0	213.0854	981.1104	655.3899	3.3544	1.1168	1121	2.651548036	0.006125076	33.15257013	0.076582437
19.28192273	×ÔÉí³µÁ¾	Road 1	185.6632896	71.72422256	7.89E-05	1.098502755	0.670588255	0	213.5035	981.125	655.3787	3.3474	1.1238	1122	3.564104737	0.008233082	33.21188271	0.076719449
19.29995766	×ÔÉí³µÁ¾	Road 1	186.0228503	71.7728508	8.10E-05	1.100674748	0.670588255	0	213.7825	981.1348	655.3711	3.3427	1.1285	1123	2.530094159	0.005844518	33.25751278	0.076824855
19.3153028	×ÔÉí³µÁ¾	Road 1	186.3289923	71.8215271	8.10E-05	1.103237748	0.670588255	0	214.0616	981.1445	655.3634	3.338	1.1332	1124	2.826802523	0.006529914	33.30089046	0.076925057
19.33490843	×ÔÉí³µÁ¾	Road 1	186.7206085	71.90886841	8.10E-05	1.107683897	0.670588255	0	214.5605	981.1621	655.3495	3.3295	1.1417	1125	3.626046242	0.008376167	33.37198135	0.077089277
19.36653856	×ÔÉí³µÁ¾	Road 1	187.3533686	72.01793518	8.04E-05	1.111034513	0.670588255	0	215.1801	981.1836	655.3318	3.3192	1.152	1126	3.004590796	0.006940605	33.46701695	0.077308809
19.38200906	×ÔÉí³µÁ¾	Road 1	187.6630657	72.06677628	7.69E-05	1.116067529	0.670588255	0	215.4602	981.1934	655.3237	3.3146	1.1566	1127	2.826059448	0.006528197	33.51073751	0.077409804
19.39858546	×ÔÉí³µÁ¾	Road 1	187.9951289	72.11622849	7.14E-05	1.119059682	0.670588255	0	215.7405	981.2031	655.3156	3.3099	1.1613	1128	2.719532197	0.006282119	33.55581757	0.077513939
19.41531801	×ÔÉí³µÁ¾	Road 1	188.3306825	72.19417648	6.83E-05	1.122485638	0.670588255	0	216.1814	981.2188	655.3025	3.3023	1.1689	1129	3.766357991	0.008700287	33.61883836	0.077659517
19.43200548	×ÔÉí³µÁ¾	Road 1	188.6655625	72.24391708	6.50E-05	1.125077486	0.662745118	0	216.4622	981.2285	655.2941	3.2976	1.1736	1130	2.722207186	0.006288299	33.66426511	0.077764452
19.44859032	×ÔÉí³µÁ¾	Road 1	188.9986123	72.29370575	6.22E-05	1.125207424	0.662745118	0	216.7432	981.2383	655.2855	3.293	1.1783	1131	2.737206868	0.006322948	33.70966122	0.077869317
19.46531957	×ÔÉí³µÁ¾	Road 1	189.3348421	72.35393829	6.00E-05	1.124937654	0.662745118	0	217.0244	981.248	655.277	3.2883	1.1829	1132	3.113097132	0.007191254	33.76174102	0.077989622
19.48199934	×ÔÉí³µÁ¾	Road 1	189.6703749	72.41813965	5.77E-05	1.125738382	0.662745118	0	217.4465	981.2627	655.2639	3.2813	1.1899	1133	3.271060692	0.00755615	33.81630157	0.078115657
19.49859921	×ÔÉí³µÁ¾	Road 1	190.00453	72.46796265	5.61E-05	1.126684189	0.662745118	0	217.7282	981.2725	655.2551	3.2767	1.1945	1134	2.742675876	0.006335581	33.86182961	0.078220826
19.51523169	×ÔÉí³µÁ¾	Road 1	190.3396874	72.54279327	5.50E-05	1.129729629	0.662745118	0	218.1511	981.2871	655.2417	3.2697	1.2015	1135	3.683289261	0.008508398	33.92309186	0.078362342
19.53191586	×ÔÉí³µÁ¾	Road 1	190.6761186	72.59289093	5.44E-05	1.13165307	0.662745118	0	218.4333	981.2969	655.2327	3.2651	1.2061	1136	2.747696875	0.00634718	33.9689349	0.07846824
19.54861872	×ÔÉí³µÁ¾	Road 1	191.0131593	72.64302979	5.41E-05	1.13383317	0.662745118	0	218.7157	981.3066	655.2235	3.2604	1.2108	1137	2.74882624	0.006349789	34.01484817	0.078574299
19.5652864	×ÔÉí³µÁ¾	Road 1	191.3498049	72.71104889	5.41E-05	1.136199355	0.662745118	0	219.0184	981.3174	655.2137	3.2552	1.216	1138	3.428633854	0.007920144	34.07199553	0.07870631
19.58206697	×ÔÉí³µÁ¾	Road 1	191.6890169	72.772435	5.41E-05	1.139833093	0.662745118	0	219.4427	981.332	655.1997	3.2483	1.223	1139	3.165648642	0.007312648	34.12511693	0.07882902
19.5985774	×ÔÉí³µÁ¾	Road 1	192.0229994	72.82289658	5.41E-05	1.142217875	0.662745118	0	219.7257	981.3418	655.1903	3.2436	1.2276	1140	2.789195949	0.006443043	34.17116773	0.078935397
19.6152601	×ÔÉí³µÁ¾	Road 1	192.3607848	72.89151993	5.41E-05	1.145402789	0.662745118	0	220.0293	981.3525	655.1801	3.2384	1.2328	1141	3.456882041	0.007985398	34.22883787	0.079068615
19.63193401	×ÔÉí³µÁ¾	Road 1	192.6986786	72.95337296	5.41E-05	1.147977471	0.662745118	0	220.4546	981.3672	655.1657	3.2314	1.2397	1142	3.205164012	0.007403929	34.28228047	0.079192068
19.64859325	×ÔÉí³µÁ¾	Road 1	193.0365104	73.00417786	5.41E-05	1.151796699	0.662745118	0	220.7384	981.377	655.1559	3.2268	1.2443	1143	2.791167335	0.006447597	34.32877921	0.07929948
19.66527375	×ÔÉí³µÁ¾	Road 1	193.3751452	73.08443985	5.40E-05	1.154823303	0.662745118	0	221.1847	981.3926	655.1404	3.2192	1.2518	1144	3.905821842	0.009022448	34.39393029	0.079449979
19.68196782	×ÔÉí³µÁ¾	Road 1	193.7142931	73.13571854	5.37E-05	1.157557607	0.662745118	0	221.4691	981.4023	655.1304	3.2146	1.2564	1145	2.809562934	0.00649009	34.44083332	0.079558325
19.69858601	×ÔÉí³µÁ¾	Road 1	194.0521369	73.18712769	5.36E-05	1.159490228	0.662745118	0	221.7536	981.4131	655.1204	3.209	1.262	1146	2.825156748	0.006526112	34.48778231	0.079666777
19.71524159	×ÔÉí³µÁ¾	Road 1	194.3911145	73.26791153	5.32E-05	1.163757324	0.662745118	0	222.2011	981.4287	655.1044	3.2014	1.2695	1147	3.939252016	0.009099672	34.55339283	0.079818337
19.73206028	×ÔÉí³µÁ¾	Road 1	194.7336532	73.319561	5.23E-05	1.166710138	0.662745118	0	222.4861	981.4385	655.0941	3.1968	1.2741	1148	2.815414957	0.006503609	34.60074444	0.07992772
19.74864292	×ÔÉí³µÁ¾	Road 1	195.0717424	73.39731674	5.14E-05	1.170331717	0.662745118	0	222.914	981.4531	655.0785	3.1899	1.281	1149	3.843506113	0.008878499	34.66447989	0.080074949
19.76523435	×ÔÉí³µÁ¾	Road 1	195.4102501	73.44922714	5.07E-05	1.173300624	0.662745118	0	223.1996	981.4629	655.068	3.1853	1.2855	1150	2.85653129	0.006598587	34.71187383	0.080184429
19.78199659	×ÔÉí³µÁ¾	Road 1	195.75252	73.50873871	4.92E-05	1.175461531	0.662745118	0	223.5262	981.4746	655.0558	3.1795	1.2913	1151	3.126209108	0.007221543	34.76427612	0.080305478
19.79862358	×ÔÉí³µÁ¾	Road 1	196.092269	73.56092377	4.77E-05	1.178423524	0.662745118	0	223.8122	981.4844	655.0451	3.1749	1.2959	1152	2.866662102	0.006621989	34.81194007	0.080415582
19.81530922	×ÔÉí³µÁ¾	Road 1	196.4335803	73.63942108	4.63E-05	1.182654023	0.662745118	0	224.2415	981.499	655.0289	3.168	1.3027	1153	3.865042478	0.008928248	34.87643077	0.080564555
19.83229946	×ÔÉí³µÁ¾	Road 1	196.7813706	73.69201126	4.44E-05	1.184976578	0.662745118	0	224.528	981.5098	655.0179	3.1624	1.3083	1154	2.843691991	0.006568928	34.92474579	0.080676163
19.84859618	×ÔÉí³µÁ¾	Road 1	197.1153214	73.7708519	4.28E-05	1.189246774	0.662745118	0	224.9582	981.5244	655.0013	3.1556	1.3151	1155	3.95636221	0.009139197	34.98922151	0.080825102
19.86525506	×ÔÉí³µÁ¾	Road 1	197.4569381	73.82370987	4.08E-05	1.191146851	0.662745118	0	225.2452	981.5342	654.9901	3.151	1.3197	1156	2.897753983	0.006693812	35.03749484	0.080936613
19.88195866	×ÔÉí³µÁ¾	Road 1	197.7997171	73.87656097	3.87E-05	1.193539858	0.662745118	0	225.5324	981.5449	654.9789	3.1454	1.3252	1157	2.8939305	0.006684979	35.08583389	0.081048276
19.89859921	×ÔÉí³µÁ¾	Road 1	198.1415884	73.9600914	3.71E-05	1.19749701	0.662745118	0	225.9842	981.5605	654.9609	3.138	1.3326	1158	4.081825877	0.009429018	35.15375772	0.08120518
19.91529877	×ÔÉí³µÁ¾	Road 1	198.4849187	74.01325836	3.53E-05	1.200294256	0.662745118	0	226.272	981.5703	654.9495	3.1334	1.3371	1159	2.911309159	0.006725124	35.20237531	0.081317487
19.9321028	×ÔÉí³µÁ¾	Road 1	198.8306637	74.07042847	3.36E-05	1.2034477	0.662745118	0	226.5806	981.5811	654.937	3.1282	1.3423	1160	3.05303949	0.007052521	35.25367869	0.081435998
19.94862129	×ÔÉí³µÁ¾	Road 1	199.170779	74.12391815	3.19E-05	1.205987811	0.662745118	0	226.8688	981.5908	654.9253	3.1237	1.3468	1161	2.950069086	0.00681466	35.30240937	0.081548566
19.96523728	×ÔÉí³µÁ¾	Road 1	199.5132907	74.20816956	3.05E-05	1.210030317	0.662745118	0	227.3221	981.6064	654.9067	3.1162	1.3542	1162	4.127067568	0.009533526	35.37098468	0.081706975
19.98192328	×ÔÉí³µÁ¾	Road 1	199.857495	74.2619751	2.90E-05	1.212166667	0.662745118	0	227.6109	981.6172	654.8948	3.1107	1.3597	1163	2.946290038	0.00680593	35.42014649	0.081820538
19.99862908	×ÔÉí³µÁ¾	Road 1	200.2023574	74.31580811	2.80E-05	1.215336084	0.662745118	0	227.8998	981.627	654.8828	3.1062	1.3642	1164	2.946811128	0.006807134	35.46937531	0.081934257
20.01527403	×ÔÉí³µÁ¾	Road 1	200.5463569	74.40082855	2.71E-05	1.217839837	0.662745118	0	228.3543	981.6426	654.8637	3.0988	1.3716	1165	4.16101273	0.009611939	35.53863515	0.082094247
20.03199559	×ÔÉí³µÁ¾	Road 1	200.8921915	74.45505981	2.67E-05	1.221663594	0.662745118	0	228.6439	981.6533	654.8514	3.0933	1.3771	1166	2.965131902	0.006849455	35.58821678	0.082208781
20.04858592	×ÔÉí³µÁ¾	Road 1	201.2355621	74.50931854	2.65E-05	1.224020362	0.662745118	0	228.9336	981.6631	654.839	3.0887	1.3816	1167	2.984652168	0.006894547	35.63773315	0.082323164
20.06530858	×ÔÉí³µÁ¾	Road 1	201.5820697	74.59504623	2.64E-05	1.228602171	0.662745118	0	229.3893	981.6787	654.8194	3.0813	1.3889	1168	4.183036359	0.009662814	35.70768464	0.082484752
20.08205579	×ÔÉí³µÁ¾	Road 1	201.9293405	74.64969635	2.64E-05	1.23034513	0.662745118	0	229.6796	981.6895	654.8068	3.0759	1.3944	1169	2.985019429	0.006895395	35.7576754	0.08260023
20.09857501	×ÔÉí³µÁ¾	Road 1	202.2721344	74.70437393	2.64E-05	1.233513236	0.662745118	0	229.9701	981.6992	654.7941	3.0714	1.3989	1170	3.017125581	0.00696956	35.80751596	0.082715362
20.11525405	×ÔÉí³µÁ¾	Road 1	202.618645	74.79078827	2.64E-05	1.237294197	0.662745118	0	230.427	981.7148	654.7739	3.064	1.4062	1171	4.228469221	0.009767764	35.87804276	0.082878279
20.13191403	×ÔÉí³µÁ¾	Road 1	202.9650145	74.84585037	2.64E-05	1.239422083	0.654901981	0	230.7181	981.7256	654.761	3.0586	1.4116	1172	3.01910903	0.006974142	35.92834105	0.082994468
20.14863155	×ÔÉí³µÁ¾	Road 1	203.312836	74.90087128	2.64E-05	1.239730358	0.654901981	0	231.0094	981.7354	654.7479	3.0541	1.4161	1173	3.012152626	0.006958073	35.97869679	0.08311079
20.16528127	×ÔÉí³µÁ¾	Road 1	203.6596468	74.98742294	2.64E-05	1.239306688	0.654901981	0	231.4676	981.751	654.7272	3.0468	1.4234	1174	4.250051745	0.00981762	36.04945893	0.08327425
20.18195297	×ÔÉí³µÁ¾	Road 1	204.0071713	75.04259491	2.64E-05	1.24038887	0.654901981	0	231.7594	981.7617	654.7139	3.0414	1.4288	1175	3.0290217	0.00699704	36.0999579	0.083390903
20.19856457	×ÔÉí³µÁ¾	Road 1	204.3536968	75.09765701	2.64E-05	1.242326379	0.654901981	0	232.0515	981.7715	654.7004	3.0369	1.4333	1176	3.034505096	0.007009707	36.15036586	0.083507345
20.21536164	×ÔÉí³µÁ¾	Road 1	204.7044972	75.18462753	2.64E-05	1.24529469	0.654901981	0	232.5108	981.7881	654.6792	3.0287	1.4416	1177	4.247014462	0.009810603	36.22170325	0.083672135
20.23194977	×ÔÉí³µÁ¾	Road 1	205.0511884	75.23985443	2.64E-05	1.24747169	0.654901981	0	232.8035	981.7979	654.6655	3.0242	1.446	1178	3.049186224	0.00704362	36.27228355	0.083788975
20.24853497	×ÔÉí³µÁ¾	Road 1	205.398074	75.29532166	2.64E-05	1.249975324	0.654901981	0	233.0963	981.8086	654.6519	3.0188	1.4514	1179	3.061018391	0.007070952	36.32305116	0.083906248
20.26527925	×ÔÉí³µÁ¾	Road 1	205.7486935	75.38275909	2.64E-05	1.25318563	0.654901981	0	233.5569	981.8242	654.63	3.0115	1.4587	1180	4.286193007	0.009901106	36.39482039	0.084072035
20.28194583	×ÔÉí³µÁ¾	Road 1	206.097944	75.43851471	2.64E-05	1.256141186	0.654901981	0	233.8503	981.835	654.616	3.0061	1.4641	1181	3.06690156	0.007084543	36.44593514	0.08419011
20.29871247	×ÔÉí³µÁ¾	Road 1	206.449552	75.49446945	2.64E-05	1.25839293	0.654901981	0	234.144	981.8447	654.6019	3.0017	1.4685	1182	3.06367544	0.00707709	36.4973027	0.084308769
20.31528228	×ÔÉí³µÁ¾	Road 1	206.7974372	75.58246307	2.64E-05	1.262217641	0.654901981	0	234.6058	981.8613	654.5796	2.9935	1.4767	1183	4.354553547	0.010059019	36.56945679	0.084475445
20.33190266	×ÔÉí³µÁ¾	Road 1	207.1466433	75.63854828	2.64E-05	1.264574289	0.654901981	0	234.9	981.8711	654.5652	2.9891	1.4812	1184	3.09326783	0.007145449	36.62086811	0.084594205
20.34860883	×ÔÉí³µÁ¾	Road 1	207.4979315	75.69885635	2.64E-05	1.267288208	0.654901981	0	235.2155	981.8818	654.5497	2.9841	1.4862	1185	3.249399612	0.007506113	36.67515311	0.084719604
20.36526331	×ÔÉí³µÁ¾	Road 1	207.8485243	75.78345795	2.64E-05	1.270894647	0.654901981	0	235.6576	981.8975	654.5278	2.9765	1.4938	1186	4.214433061	0.00973534	36.74534229	0.084881741
20.38193941	×ÔÉí³µÁ¾	Road 1	208.1998344	75.84003067	2.64E-05	1.273816466	0.654901981	0	235.9526	981.9082	654.5131	2.9711	1.4991	1187	3.112470245	0.007189806	36.79724618	0.085001639
20.39861405	×ÔÉí³µÁ¾	Road 1	208.5513956	75.90090179	2.64E-05	1.276296854	0.654901981	0	236.2689	981.9189	654.4973	2.9661	1.5041	1188	3.283880128	0.007585763	36.85200369	0.085128129
20.41522564	×ÔÉí³µÁ¾	Road 1	208.9020208	75.9861557	2.64E-05	1.280713201	0.654901981	0	236.7122	981.9346	654.4748	2.9585	1.5117	1189	4.259272956	0.009838921	36.922757	0.085291569
20.43192008	×ÔÉí³µÁ¾	Road 1	209.2546592	76.04319534	2.64E-05	1.28324008	0.654901981	0	237.008	981.9443	654.4598	2.9541	1.5161	1190	3.135926246	0.00724399	36.97510951	0.085412503
20.44857346	×ÔÉí³µÁ¾	Road 1	209.6068282	76.12919769	2.64E-05	1.286950231	0.654901981	0	237.4521	981.96	654.4373	2.9466	1.5237	1191	4.287796691	0.00990481	37.04651581	0.085577452
20.46530491	×ÔÉí³µÁ¾	Road 1	209.960916	76.18680038	2.64E-05	1.288380504	0.654901981	0	237.7485	981.9707	654.4221	2.9412	1.529	1192	3.158447633	0.007296014	37.09936124	0.085699524
20.48194069	×ÔÉí³µÁ¾	Road 1	210.3132655	76.24879074	2.64E-05	1.289772987	0.654901981	0	238.0663	981.9814	654.406	2.9362	1.534	1193	3.347473928	0.007732665	37.15504909	0.085828163
20.49859811	×ÔÉí³µÁ¾	Road 1	210.666476	76.33584366	2.64E-05	1.291256309	0.654901981	0	238.5116	981.9971	654.3834	2.9287	1.5415	1194	4.339361263	0.010023925	37.22733162	0.085995136
20.51528961	×ÔÉí³µÁ¾	Road 1	211.0206798	76.39420166	2.64E-05	1.29173255	0.654901981	0	238.8088	982.0078	654.3683	2.9234	1.5469	1195	3.20152209	0.007395516	37.28076982	0.086118578
20.53195765	×ÔÉí³µÁ¾	Road 1	211.3746755	76.45676193	2.64E-05	1.292190671	0.654901981	0	239.1275	982.0186	654.3521	2.9184	1.5518	1196	3.373599447	0.007793015	37.33700112	0.086248473
20.54862386	×ÔÉí³µÁ¾	Road 1	211.7289033	76.51530533	2.64E-05	1.292217493	0.654901981	0	239.4251	982.0293	654.3369	2.9131	1.5571	1197	3.216980287	0.007431224	37.39061598	0.086372323
20.56526294	×ÔÉí³µÁ¾	Road 1	212.0829805	76.60746689	2.64E-05	1.291905403	0.654901981	0	239.8933	982.0449	654.3132	2.906	1.5643	1198	4.560576372	0.010534931	37.46649979	0.086547615
20.58189213	×ÔÉí³µÁ¾	Road 1	212.4371183	76.66617508	2.64E-05	1.291479468	0.654901981	0	240.1916	982.0557	654.298	2.9006	1.5696	1199	3.234473873	0.007471635	37.52028646	0.086671862
20.59861112	×ÔÉí³µÁ¾	Road 1	212.7934404	76.72469101	2.64E-05	1.291905403	0.654901981	0	240.49	982.0664	654.2829	2.8953	1.5749	1200	3.216526175	0.007430175	37.57406354	0.086796087
20.61522418	×ÔÉí³µÁ¾	Road 1	213.1479301	76.8168663	2.64E-05	1.29057169	0.654901981	0	240.9595	982.082	654.259	2.8882	1.582	1201	4.578533162	0.010576412	37.65012698	0.086971793
20.6319549	×ÔÉí³µÁ¾	Road 1	213.5052029	76.8754509	2.64E-05	1.291580796	0.654901981	0	241.2586	982.0928	654.2438	2.8828	1.5873	1202	3.223353658	0.007445947	37.70405601	0.087096369
20.64861524	×ÔÉí³µÁ¾	Road 1	213.8613788	76.96320419	2.64E-05	1.290665984	0.654901981	0	241.7076	982.1084	654.221	2.8753	1.5948	1203	4.399891895	0.01016375	37.77735972	0.087265701
20.66527962	×ÔÉí³µÁ¾	Road 1	214.217912	77.02176132	2.64E-05	1.29089427	0.654901981	0	242.0072	982.1191	654.2058	2.87	1.6001	1204	3.237098873	0.007477698	37.83130395	0.087390312
20.68186665	×ÔÉí³µÁ¾	Road 1	214.57308	77.08458939	2.64E-05	1.290464759	0.654901981	0	242.3285	982.1299	654.1895	2.8651	1.605	1205	3.421799227	0.007904356	37.88806145	0.087521422
20.69856035	×ÔÉí³µÁ¾	Road 1	214.9308038	77.14321518	2.64E-05	1.290000439	0.654901981	0	242.6286	982.1406	654.1742	2.8598	1.6103	1206	3.240358255	0.007485228	37.94215502	0.087646378
20.71522766	×ÔÉí³µÁ¾	Road 1	215.2883874	77.23508835	2.64E-05	1.290321827	0.654901981	0	243.1006	982.1572	654.1503	2.8518	1.6183	1207	4.577707971	0.010574505	38.01845309	0.087822627
20.73197158	×ÔÉí³µÁ¾	Road 1	215.6478864	77.29351501	2.64E-05	1.290367842	0.654901981	0	243.4013	982.167	654.135	2.8474	1.6226	1208	3.231118094	0.007463883	38.07255466	0.087947601
20.74854395	×ÔÉí³µÁ¾	Road 1	216.0039718	77.35208588	2.64E-05	1.289127111	0.654901981	0	243.7022	982.1777	654.1197	2.8422	1.6279	1209	3.263288492	0.007538196	38.12663509	0.088072527
20.76521455	×ÔÉí³µÁ¾	Road 1	216.3625935	77.44399338	2.64E-05	1.289476871	0.654901981	0	244.1756	982.1943	654.0956	2.8341	1.6359	1210	4.589931278	0.010602741	38.20315203	0.088249281
20.78196104	×ÔÉí³µÁ¾	Road 1	216.7231395	77.50673904	2.64E-05	1.289182186	0.654901981	0	244.4986	982.2061	654.0792	2.8283	1.6418	1211	3.411460992	0.007880475	38.26028201	0.088381251
20.798996	×ÔÉí³µÁ¾	Road 1	217.090172	77.56500092	2.64E-05	1.289430499	0.654901981	0	244.8004	982.2158	654.0639	2.824	1.6461	1212	3.19498931	0.007380425	38.31470854	0.088506977
20.81527623	×ÔÉí³µÁ¾	Road 1	217.44134	77.65278168	2.64E-05	1.288905621	0.654901981	0	245.2534	982.2324	654.0409	2.8156	1.6545	1213	4.520257715	0.010441795	38.38829935	0.088676971
20.83189515	×ÔÉí³µÁ¾	Road 1	217.8000836	77.71123581	2.64E-05	1.28949523	0.654901981	0	245.5557	982.2422	654.0255	2.8113	1.6588	1214	3.265691631	0.007543748	38.44257162	0.08880234
20.84854853	×ÔÉí³µÁ¾	Road 1	218.1598408	77.76957321	2.64E-05	1.28831768	0.654901981	0	245.8582	982.2529	654.0101	2.806	1.6641	1215	3.258322085	0.007526724	38.4968337	0.088927686
20.86567147	×ÔÉí³µÁ¾	Road 1	218.5302182	77.86973419	2.64E-05	1.289187074	0.654901981	0	246.3774	982.2715	653.9838	2.7969	1.6732	1216	4.839547105	0.011179354	38.57970096	0.089119109
20.88202317	×ÔÉí³µÁ¾	Road 1	218.8841791	77.92822266	2.64E-05	1.287931561	0.654901981	0	246.6806	982.2813	653.9684	2.7926	1.6775	1217	3.314083568	0.007655533	38.63389187	0.08924429
20.90203164	×ÔÉí³µÁ¾	Road 1	219.3176679	77.99495773	2.64E-05	1.288094521	0.654901981	0	247.0273	982.2939	653.9508	2.7862	1.6839	1218	3.153787731	0.00728525	38.69699433	0.089390057
20.91758498	×ÔÉí³µÁ¾	Road 1	219.655031	78.08656998	2.64E-05	1.287617922	0.654901981	0	247.5045	982.3105	653.9265	2.7782	1.6919	1219	4.879843361	0.011272438	38.77289221	0.089565381
20.93310717	×ÔÉí³µÁ¾	Road 1	219.9919884	78.14919891	2.64E-05	1.287997603	0.654901981	0	247.8303	982.3223	653.91	2.7725	1.6977	1220	3.63169242	0.008389209	38.82926402	0.0896956
20.9485982	×ÔÉí³µÁ¾	Road 1	220.3285209	78.20765305	2.64E-05	1.287551641	0.670588255	0	248.1345	982.332	653.8945	2.7683	1.7019	1221	3.457663541	0.007987203	38.88282679	0.08981933
20.96531316	×ÔÉí³µÁ¾	Road 1	220.6919131	78.26592865	2.64E-05	1.292719722	0.670588255	0	248.439	982.3428	653.879	2.7632	1.7072	1222	3.265984116	0.007544423	38.93741758	0.089945435
20.98191045	×ÔÉí³µÁ¾	Road 1	221.0530184	78.32475357	2.64E-05	1.29752934	0.670588255	0	248.7437	982.3535	653.8635	2.7581	1.7124	1223	3.307323812	0.007639918	38.99231021	0.090072237
20.9985609	×ÔÉí³µÁ¾	Road 1	221.415592	78.39218216	2.64E-05	1.302932858	0.670588255	0	249.0922	982.3662	653.8459	2.7516	1.7188	1224	3.652030728	0.008436191	39.05311816	0.090212703
21.01528246	×ÔÉí³µÁ¾	Road 1	221.7801654	78.48934937	2.64E-05	1.306071997	0.670588255	0	249.5937	982.3828	653.8203	2.7441	1.7263	1225	4.849579997	0.01120253	39.13421069	0.090400027
21.03186619	×ÔÉí³µÁ¾	Road 1	222.1420069	78.5486412	2.64E-05	1.307051182	0.670588255	0	249.8993	982.3936	653.8048	2.7388	1.7315	1226	3.336987378	0.007708441	39.1895504	0.090527861
21.04859765	×ÔÉí³µÁ¾	Road 1	222.5073476	78.60800171	2.64E-05	1.308491826	0.678431392	0	250.2051	982.4043	653.7893	2.7336	1.7367	1227	3.320633142	0.007670663	39.24510943	0.090656203
21.06521987	×ÔÉí³µÁ¾	Road 1	222.8706163	78.67585602	2.64E-05	1.31129837	0.678431392	0	250.533	982.416	653.7726	2.7278	1.7425	1228	3.686236852	0.008515207	39.30638287	0.090797744
21.0819264	×ÔÉí³µÁ¾	Road 1	223.2361435	78.76547012	2.64E-05	1.316416502	0.678431392	0	251.0144	982.4326	653.7482	2.7199	1.7504	1229	4.561771803	0.010537693	39.38259425	0.090973793
21.09857978	×ÔÉí³µÁ¾	Road 1	223.600784	78.82520828	2.64E-05	1.3184551	0.678431392	0	251.321	982.4434	653.7326	2.7147	1.7556	1230	3.355744951	0.007751771	39.43847874	0.091102886
21.11528264	×ÔÉí³µÁ¾	Road 1	223.9669256	78.91517944	2.64E-05	1.319521308	0.678431392	0	251.7814	982.459	653.7092	2.7075	1.763	1231	4.585240548	0.010591906	39.51506539	0.091279801
21.13194042	×ÔÉí³µÁ¾	Road 1	224.3323562	78.97513046	2.64E-05	1.320545197	0.678431392	0	252.0886	982.4697	653.6936	2.7023	1.7683	1232	3.369627048	0.007783838	39.57119589	0.091409463
21.1486037	×ÔÉí³µÁ¾	Road 1	224.6981855	79.03521194	2.64E-05	1.320920348	0.678431392	0	252.3961	982.4805	653.678	2.6971	1.7737	1233	3.376495755	0.007799705	39.62745937	0.091539431
21.16519549	×ÔÉí³µÁ¾	Road 1	225.0628799	79.12946091	2.64E-05	1.321388602	0.678431392	0	252.8797	982.498	653.6534	2.6884	1.7824	1234	4.797631203	0.011082528	39.7070607	0.09172331
21.18188406	×ÔÉí³µÁ¾	Road 1	225.4299801	79.18956299	2.64E-05	1.320560694	0.678431392	0	253.1878	982.5088	653.6378	2.6832	1.7874	1235	3.379611642	0.007806903	39.76346158	0.091853596
21.19855797	×ÔÉí³µÁ¾	Road 1	225.7970342	79.24926682	2.64E-05	1.321428537	0.678431392	0	253.4961	982.5195	653.6221	2.6781	1.7925	1236	3.367756581	0.007779518	39.81961523	0.091983311
21.21519192	×ÔÉí³µÁ¾	Road 1	226.1636448	79.34363937	2.64E-05	1.321158648	0.678431392	0	253.8266	982.5303	653.6053	2.6733	1.7971	1237	4.805035055	0.011099631	39.89954195	0.092167942
21.23187866	×ÔÉí³µÁ¾	Road 1	226.5316968	79.40362473	2.64E-05	1.321054578	0.678431392	0	254.2899	982.5469	653.5818	2.6652	1.8051	1238	3.383413556	0.007815685	39.95600008	0.09229836
21.24853643	×ÔÉí³µÁ¾	Road 1	226.8993877	79.46360321	2.64E-05	1.320855021	0.678431392	0	254.599	982.5576	653.5661	2.66	1.8102	1239	3.389750341	0.007830323	40.01246579	0.092428796
21.26524736	×ÔÉí³µÁ¾	Road 1	227.2686891	79.55782471	2.64E-05	1.320944786	0.678431392	0	255.0853	982.5742	653.5414	2.6523	1.818	1240	4.793037134	0.011071916	40.09256189	0.092613818
21.28201474	×ÔÉí³µÁ¾	Road 1	227.6395177	79.61787186	2.64E-05	1.320025563	0.678431392	0	255.395	982.585	653.5256	2.6471	1.8232	1241	3.382378376	0.007813294	40.14927551	0.092744826
21.29856622	×ÔÉí³µÁ¾	Road 1	228.0059846	79.70775375	2.64E-05	1.320593119	0.678431392	0	255.86	982.6016	653.502	2.639	1.8314	1242	4.658507419	0.010761152	40.22638068	0.092922939
21.31518514	×ÔÉí³µÁ¾	Road 1	228.3742215	79.76767044	2.64E-05	1.319119692	0.678431392	0	256.1703	982.6123	653.4862	2.6339	1.8365	1243	3.404816325	0.007865126	40.28296506	0.093053649
21.34853368	×ÔÉí³µÁ¾	Road 1	229.1144953	79.91310196	2.62E-05	1.319021583	0.678431392	0	256.9249	982.6387	653.4479	2.6212	1.8492	1244	3.930512438	0.009079484	40.41404193	0.093356437
21.36529153	×ÔÉí³µÁ¾	Road 1	229.4867651	79.97276459	2.60E-05	1.319275856	0.678431392	0	257.236	982.6494	653.4321	2.6161	1.8544	1245	3.381682671	0.007811687	40.47071166	0.093487344
21.3825347	×ÔÉí³µÁ¾	Road 1	229.8702467	80.06263275	2.53E-05	1.318726301	0.678431392	0	257.7031	982.666	653.4084	2.608	1.8625	1246	4.526735168	0.010456758	40.54876691	0.093667652
21.39851361	×ÔÉí³µÁ¾	Road 1	230.2258768	80.12236404	2.48E-05	1.318340182	0.678431392	0	258.0148	982.6768	653.3925	2.603	1.8676	1247	3.5105495	0.008109369	40.60486168	0.09379723
21.41526523	×ÔÉí³µÁ¾	Road 1	230.5989841	80.18248672	2.43E-05	1.318661571	0.686274529	0	258.3268	982.6875	653.3767	2.5979	1.8727	1248	3.409699899	0.007876407	40.66197967	0.093929173
21.43390571	×ÔÉí³µÁ¾	Road 1	231.0145822	80.26366196	2.40E-05	1.321440935	0.686274529	0	258.7504	982.7021	653.3551	2.5909	1.8797	1249	3.943381778	0.009109212	40.7354862	0.094098973
21.4488557	×ÔÉí³µÁ¾	Road 1	231.3481482	80.32363358	2.34E-05	1.324256301	0.686274529	0	259.0629	982.7129	653.3392	2.5859	1.8848	1250	3.708289222	0.008566148	40.79092509	0.094227037
21.4652162	×ÔÉí³µÁ¾	Road 1	231.7135959	80.41390686	2.29E-05	1.327194214	0.686274529	0	259.5321	982.7295	653.3154	2.5778	1.8929	1251	4.757772398	0.010990454	40.86876463	0.094406846
21.48198651	×ÔÉí³µÁ¾	Road 1	232.0884984	80.4784584	2.26E-05	1.327343941	0.686274529	0	259.8675	982.7412	653.2984	2.5722	1.8986	1252	3.601930546	0.00832046	40.92917012	0.094546383
21.49851966	×ÔÉí³µÁ¾	Road 1	232.458396	80.54312668	2.22E-05	1.327280164	0.686274529	0	260.2032	982.7529	653.2814	2.5665	1.9043	1253	3.647911979	0.008426677	40.9894816	0.094685702
21.51522913	×ÔÉí³µÁ¾	Road 1	232.8325177	80.60332489	2.20E-05	1.328504682	0.694117665	0	260.5168	982.7637	653.2654	2.5615	1.9093	1254	3.435477057	0.007935952	41.04688657	0.094818308
21.53192429	×ÔÉí³µÁ¾	Road 1	233.2067595	80.69823303	2.19E-05	1.331281304	0.694117665	0	260.8754	982.7764	653.2472	2.5552	1.9155	1255	4.889833887	0.011295516	41.12852316	0.095006888
21.54852819	×ÔÉí³µÁ¾	Road 1	233.5792553	80.76327896	2.16E-05	1.335372925	0.694117665	0	261.3466	982.793	653.2232	2.5471	1.9236	1256	3.66130093	0.008457605	41.18931501	0.095147318
21.56519879	×ÔÉí³µÁ¾	Road 1	233.9536692	80.85427322	2.15E-05	1.337597013	0.694117665	0	261.661	982.8037	653.2073	2.5421	1.9287	1257	4.740702009	0.010951022	41.26834539	0.095329878
21.58193831	×ÔÉí³µÁ¾	Road 1	234.3297726	80.88477402	2.14E-05	1.338572264	0.701960802	0	261.9757	982.8145	653.1913	2.5371	1.9337	1258	2.202507331	0.005087792	41.30521431	0.095415045
21.59857813	×ÔÉí³µÁ¾	Road 1	234.7041182	80.98913727	2.14E-05	1.342629552	0.701960802	0	262.5156	982.833	653.1639	2.5283	1.9425	1259	5.316827821	0.012281872	41.39368535	0.095619413
21.61524104	×ÔÉí³µÁ¾	Road 1	235.0792663	81.05024872	2.12E-05	1.346450686	0.701960802	0	262.8309	982.8447	653.1478	2.5223	1.9486	1260	3.498274635	0.008081014	41.45197678	0.095754066
21.63186619	×ÔÉí³µÁ¾	Road 1	235.4538471	81.11149063	2.12E-05	1.347824216	0.701960802	0	263.1465	982.8555	653.1318	2.5173	1.9536	1261	3.512024526	0.008112777	41.51036473	0.095888943
21.64851261	×ÔÉí³µÁ¾	Road 1	235.829231	81.18156967	2.12E-05	1.349590182	0.701960802	0	263.5074	982.8682	653.1135	2.5112	1.9598	1262	3.883643774	0.008971217	41.57501347	0.096038281
21.66519934	×ÔÉí³µÁ¾	Road 1	236.2059916	81.28240356	2.10E-05	1.350431323	0.701960802	0	264.0267	982.8857	653.0872	2.503	1.968	1263	5.174241212	0.011952497	41.66135467	0.096237729
21.68190807	×ÔÉí³µÁ¾	Road 1	236.583554	81.34817734	2.08E-05	1.350604177	0.701960802	0	264.3658	982.8975	653.0699	2.4975	1.9736	1264	3.698978132	0.008544639	41.72315989	0.096380499
21.69851416	×ÔÉí³µÁ¾	Road 1	236.9590805	81.40959778	2.05E-05	1.351588845	0.701960802	0	264.6825	982.9092	653.0538	2.4915	1.9791	1265	3.534364677	0.008164382	41.78185188	0.096516078
21.71517891	×ÔÉí³µÁ¾	Road 1	237.33638	81.50611954	1.99E-05	1.350833774	0.701960802	0	265.1806	982.9258	653.0285	2.484	1.9863	1266	5.011236207	0.011575956	41.86536284	0.096708988
21.73185245	×ÔÉí³µÁ¾	Road 1	237.7141633	81.56753998	1.95E-05	1.351415038	0.701960802	0	265.4979	982.9375	653.0125	2.478	1.9923	1267	3.53009907	0.008154529	41.92422209	0.096844953
21.74885185	×ÔÉí³µÁ¾	Road 1	238.0996401	81.63322449	1.89E-05	1.351003766	0.701960802	0	265.8382	982.9492	652.9951	2.4725	1.9978	1268	3.659723483	0.008453961	41.98643522	0.096988665
21.76519476	×ÔÉí³µÁ¾	Road 1	238.4705093	81.69473419	1.81E-05	1.351361752	0.701960802	0	266.156	982.96	652.9789	2.4675	2.0028	1269	3.59158604	0.008296564	42.04513217	0.097124255
21.78202225	×ÔÉí³µÁ¾	Road 1	238.8527029	81.7648201	1.73E-05	1.3513273	0.701960802	0	266.5195	982.9727	652.9604	2.4614	2.009	1270	3.877690801	0.008957466	42.11038399	0.097274987
21.7986694	×ÔÉí³µÁ¾	Road 1	239.2313082	81.87463531	1.67E-05	1.350881934	0.701960802	0	267.0881	982.9922	652.9316	2.4522	2.0182	1271	5.601180764	0.012938728	42.20362767	0.09749038
21.81806902	×ÔÉí³µÁ¾	Road 1	239.6728188	81.93141403	1.59E-05	1.350331187	0.701960802	0	267.3841	983.0029	652.9166	2.4469	2.0236	1272	3.008841771	0.006950424	42.26199805	0.097625215
21.83348857	×ÔÉí³µÁ¾	Road 1	240.0241616	82.02792892	1.53E-05	1.35014987	0.701960802	0	267.8854	983.0205	652.8911	2.4384	2.0321	1273	5.372465792	0.012410396	42.34483906	0.097816578
21.84850198	×ÔÉí³µÁ¾	Road 1	240.3663779	82.05858078	1.46E-05	1.349646211	0.701960802	0	268.045	983.0264	652.8831	2.4354	2.0351	1274	2.385782893	0.005511158	42.38065779	0.097899319
21.86517588	×ÔÉí³µÁ¾	Road 1	240.7469104	82.15932541	1.43E-05	1.349674463	0.701960802	0	268.57	983.0439	652.8563	2.4274	2.0432	1275	5.226358544	0.012072888	42.4678016	0.098100622
21.88189561	×ÔÉí³µÁ¾	Road 1	241.1287728	82.22053299	1.41E-05	1.349680066	0.701960802	0	268.8898	983.0557	652.8401	2.4215	2.0491	1276	3.539698656	0.008176704	42.52698439	0.098237334
21.89913768	×ÔÉí³µÁ¾	Road 1	241.5228586	82.28182297	1.39E-05	1.349852562	0.701960802	0	269.2099	983.0664	652.8238	2.4166	2.0541	1277	3.466678896	0.008008028	42.58675711	0.098375409
21.91523426	×ÔÉí³µÁ¾	Road 1	241.8912133	82.3825264	1.39E-05	1.349086642	0.701960802	0	269.7363	983.085	652.7971	2.4076	2.0631	1278	5.392118464	0.012455794	42.67355177	0.098575905
21.93192429	×ÔÉí³µÁ¾	Road 1	242.273433	82.44386444	1.39E-05	1.348630667	0.701960802	0	270.057	983.0957	652.7808	2.4027	2.0681	1279	3.558704525	0.008220607	42.73294668	0.098713107
21.94913484	×ÔÉí³µÁ¾	Road 1	242.6678657	82.50510635	1.39E-05	1.34880507	0.701960802	0	270.378	983.1074	652.7645	2.3968	2.074	1280	3.477925523	0.008034008	42.79280367	0.098851376
21.96523325	×ÔÉí³µÁ¾	Road 1	243.0372403	82.60122299	1.39E-05	1.348280907	0.701960802	0	270.8828	983.125	652.7388	2.3884	2.0824	1281	5.201989586	0.012016596	42.87654744	0.099044825
21.9818639	×ÔÉí³µÁ¾	Road 1	243.4191301	82.66681824	1.39E-05	1.348445058	0.701960802	0	271.2274	983.1367	652.7213	2.3829	2.0879	1282	3.75962771	0.00868474	42.93907251	0.099189257
21.99852608	×ÔÉí³µÁ¾	Road 1	243.8020275	82.72812195	1.39E-05	1.347589493	0.701960802	0	271.5492	983.1484	652.705	2.377	2.0938	1283	3.572862891	0.008253313	42.99860418	0.099326776
22.01527	×ÔÉí³µÁ¾	Road 1	244.18723	82.81986465	1.39E-05	1.347255945	0.701960802	0	272.0324	983.165	652.6804	2.3692	2.1017	1284	4.863570651	0.011234848	43.08003941	0.099514891
22.03187646	×ÔÉí³µÁ¾	Road 1	244.5695519	82.88092804	1.39E-05	1.347261429	0.694117665	0	272.3549	983.1758	652.6641	2.3643	2.1066	1285	3.577390392	0.008263772	43.1394472	0.099652123
22.04851444	×ÔÉí³µÁ¾	Road 1	244.9528822	82.94209442	1.39E-05	1.343585014	0.678431392	0	272.6775	983.1875	652.6476	2.3585	2.1135	1286	3.579251835	0.008268072	43.19899873	0.099789687
22.0652195	×ÔÉí³µÁ¾	Road 1	245.3381798	83.03297882	1.39E-05	1.330127597	0.670588255	0	273.162	983.2041	652.623	2.3507	2.1213	1287	4.84763095	0.011198027	43.27997871	0.099976751
22.0819176	×ÔÉí³µÁ¾	Road 1	245.7235953	83.0930603	1.39E-05	1.318790913	0.654901981	0	273.4852	983.2158	652.6066	2.3448	2.1272	1288	3.529100569	0.008152222	43.33890798	0.100112877
22.09875792	×ÔÉí³µÁ¾	Road 1	246.112709	83.18185043	1.39E-05	1.298264742	0.639215708	0	273.9705	983.2324	652.582	2.337	2.135	1289	4.735092632	0.010938064	43.41864847	0.100297078
22.11518294	×ÔÉí³µÁ¾	Road 1	246.4925035	83.24254303	1.39E-05	1.534801602	0.631372571	0	274.2943	983.2432	652.5655	2.3322	2.1399	1290	3.604676995	0.008326804	43.47785534	0.100433846
22.13191879	×ÔÉí³µÁ¾	Road 1	246.8800251	83.35862732	1.39E-05	2.954795122	0.615686297	0	274.6417	983.2559	652.5479	2.3258	2.1463	1291	5.941633147	0.013725173	43.57729365	0.100663548
22.14859673	×ÔÉí³µÁ¾	Road 1	247.2673431	83.60414429	1.39E-05	3.329805136	0.58431375	0	275.129	983.2725	652.5231	2.3181	2.1541	1292	11.57067761	0.026728265	43.7702687	0.101109321
22.1662695	×ÔÉí³µÁ¾	Road 1	247.6784381	83.74137039	1.39E-05	2.378605366	0.552941203	0	275.4547	983.2842	652.5065	2.3123	2.1599	1293	6.56605558	0.015167588	43.8863091	0.101377374
22.18338768	×ÔÉí³µÁ¾	Road 1	248.0770931	83.83826981	1.39E-05	1.521245003	0.505882382	0	275.7807	983.2949	652.49	2.3074	2.1647	1294	5.05098219	0.011667769	43.97277268	0.101577105
22.19852205	×ÔÉí³µÁ¾	Road 1	248.4299446	83.9324913	1.39E-05	1.717442632	0.450980395	0	276.2704	983.3125	652.4651	2.2988	2.1734	1295	5.466012032	0.012626488	44.05549733	0.101768199
22.21523737	×ÔÉí³µÁ¾	Road 1	248.8200685	84.02146683	1.39E-05	2.004533052	0.403921574	0	276.5972	983.3242	652.4485	2.293	2.1792	1296	4.816538033	0.011126203	44.13600734	0.101954177
22.23196296	×ÔÉí³µÁ¾	Road 1	249.2108572	84.11296921	1.39E-05	1.835126281	0.372549027	0	276.9243	983.335	652.4319	2.2882	2.184	1297	4.928786353	0.011385496	44.2184442	0.102144606
22.24925342	×ÔÉí³µÁ¾	Road 1	249.6153441	84.21715393	1.39E-05	1.24595499	0.325490206	0	277.4157	983.3525	652.407	2.2795	2.1927	1298	5.337730151	0.012330157	44.31073598	0.1023578
22.2660054	×ÔÉí³µÁ¾	Road 1	250.0074767	84.26927032	1.39E-05	1.164390683	0.286274523	0	277.7435	983.3633	652.3903	2.2747	2.1974	1299	3.220364439	0.007439042	44.36468346	0.102482419
22.28305209	×ÔÉí³µÁ¾	Road 1	250.4069246	84.35726395	1.39E-05	1.416642189	0.262745112	0	278.2357	983.3809	652.3652	2.2661	2.2061	1300	4.717256165	0.010896862	44.44509709	0.102668174
22.29851123	×ÔÉí³µÁ¾	Road 1	250.7694684	84.42628555	1.39E-05	1.361421347	0.239215687	0	278.5876	983.3936	652.3474	2.2598	2.2124	1301	4.212862596	0.009731713	44.51022431	0.102818618
22.31521006	×ÔÉí³µÁ¾	Road 1	251.1613598	84.485495	1.39E-05	1.113694072	0.223529413	0	278.9397	983.4053	652.3295	2.2545	2.2177	1302	3.545011488	0.008188977	44.56942187	0.102955365
22.33191439	×ÔÉí³µÁ¾	Road 1	251.553587	84.53005142	1.39E-05	0.961019874	0.20784314	0	279.2686	983.417	652.3128	2.2487	2.2234	1303	2.905464993	0.006711624	44.61795571	0.103067478
22.34863742	×ÔÉí³µÁ¾	Road 1	251.9465473	84.5933876	1.39E-05	1.014863014	0.192156866	0	279.7622	983.4336	652.2877	2.2411	2.2311	1304	3.725679541	0.00860632	44.68026034	0.103211401
22.36525011	×ÔÉí³µÁ¾	Road 1	252.337123	84.63843842	1.39E-05	1.033275127	0.176470593	0	280.0915	983.4453	652.271	2.2354	2.2368	1305	2.941321697	0.006794453	44.72912361	0.103324276
22.38191485	×ÔÉí³µÁ¾	Road 1	252.7291232	84.68182068	1.39E-05	0.943786144	0.160784319	0	280.421	983.457	652.2543	2.2296	2.2425	1306	2.863244162	0.006614094	44.77683884	0.103434498
22.39859866	×ÔÉí³µÁ¾	Road 1	253.1218352	84.73866806	1.39E-05	0.789936543	0.145098045	0	280.939	983.4746	652.228	2.2215	2.2507	1307	3.453468571	0.007977512	44.83445583	0.103567593
22.41516369	×ÔÉí³µÁ¾	Road 1	253.5119002	84.7709404	1.39E-05	0.776286066	0.121568628	0	281.2688	983.4863	652.2112	2.2157	2.2564	1308	2.386301122	0.005512356	44.873985	0.103658905
22.43183577	×ÔÉí³µÁ¾	Road 1	253.9046363	84.8034874	1.39E-05	0.779817998	0.113725491	0	281.5988	983.498	652.1945	2.21	2.2622	1309	2.390006382	0.005520915	44.91383136	0.10375095
22.44849758	×ÔÉí³µÁ¾	Road 1	254.2973567	84.85234909	1.39E-05	0.743832648	0.090196081	0	282.1176	983.5156	652.1681	2.2018	2.2703	1310	3.109763318	0.007183553	44.96564565	0.103870641
22.46519458	×ÔÉí³µÁ¾	Road 1	254.6910339	84.87980118	1.39E-05	0.657925248	0.082352944	0	282.4478	983.5273	652.1512	2.196	2.276	1311	2.166000681	0.005003462	45.00181136	0.103954184
22.48198541	×ÔÉí³µÁ¾	Road 1	255.0871002	84.91765594	1.39E-05	0.618862808	0.06666667	0	282.9434	983.5449	652.1261	2.1874	2.2846	1312	2.614573176	0.006039664	45.04571223	0.104055595
22.49896613	×ÔÉí³µÁ¾	Road 1	255.4877567	84.94126968	1.39E-05	0.592586517	0.06666667	0	283.2739	983.5566	652.1094	2.1817	2.2903	1313	1.981312261	0.004576831	45.07935633	0.104133313
22.51595271	×ÔÉí³µÁ¾	Road 1	255.8886554	84.96326981	1.39E-05	0.554022193	0.05882353	0	283.6045	983.5674	652.0925	2.1769	2.295	1314	1.91166487	0.004415946	45.11182897	0.104208325
22.5322146	×ÔÉí³µÁ¾	Road 1	256.2725485	84.98487167	1.39E-05	0.518492877	0.05882353	0	283.9588	983.5801	652.0746	2.1706	2.3013	1315	1.936476074	0.00447326	45.14331975	0.104281069
22.54851865	×ÔÉí³µÁ¾	Road 1	256.6575746	85.01531067	1.39E-05	0.495672077	0.050980393	0	284.5023	983.5986	652.0469	2.1619	2.31	1316	2.332639847	0.005388398	45.18135123	0.104368921
22.56517643	×ÔÉí³µÁ¾	Road 1	257.0510435	85.03463974	1.39E-05	0.483680159	0.050980393	0	284.8568	983.6113	652.0289	2.1556	2.3162	1317	1.813996487	0.004190332	45.21156838	0.104438723
22.64891142	×ÔÉí³µÁ¾	Road 1	259.0309506	85.12171326	1.41E-05	0.402538121	0.043137256	0	286.7487	983.6768	651.9325	2.1243	2.3473	1318	1.726615566	0.003988482	45.35614651	0.104772698
22.66521071	×ÔÉí³µÁ¾	Road 1	259.4164406	85.14260788	1.43E-05	0.391878963	0.043137256	0	287.2693	983.6953	651.9064	2.1152	2.3564	1319	1.905352626	0.004401365	45.3872024	0.104844438
22.68200558	×ÔÉí³µÁ¾	Road 1	259.8137105	85.15528336	1.53E-05	0.386726201	0.019607844	0	287.6007	983.707	651.8895	2.1095	2.3621	1320	1.5176857	0.003505854	45.41269173	0.104903318
22.69852736	×ÔÉí³µÁ¾	Road 1	260.2045781	85.16774597	1.55E-05	0.379976869	0.019607844	0	287.9321	983.7188	651.8727	2.1037	2.3678	1321	1.517563618	0.003505572	45.43776459	0.104961236
22.71525405	×ÔÉí³µÁ¾	Road 1	260.6003769	85.18575668	1.57E-05	0.368874699	0.011764706	0	288.4293	983.7354	651.8474	2.0961	2.3753	1322	1.7551575	0.004054414	45.46712257	0.105029053
22.73192649	×ÔÉí³µÁ¾	Road 1	260.9949453	85.19725113	1.57E-05	0.363798052	0.011764706	0	288.7609	983.7471	651.8306	2.0904	2.381	1323	1.470217901	0.003396203	45.49163469	0.105085676
22.74868617	×ÔÉí³µÁ¾	Road 1	261.3916571	85.21419067	1.57E-05	0.355233371	0.011764706	0	289.2582	983.7646	651.8053	2.0818	2.3896	1324	1.707025215	0.003943228	45.52024388	0.105151763
22.76522885	×ÔÉí³µÁ¾	Road 1	261.7832827	85.2251358	1.57E-05	0.347422987	0	0	289.5899	983.7764	651.7885	2.0761	2.3953	1325	1.450130167	0.003349801	45.54423292	0.105207178
22.78300902	×ÔÉí³µÁ¾	Road 1	262.2042592	85.23626633	1.57E-05	0.341253191	0	0	289.9215	983.7881	651.7716	2.0704	2.401	1326	1.424041927	0.003289537	45.56955263	0.105265667
22.79848979	×ÔÉí³µÁ¾	Road 1	262.5708379	85.24664841	1.57E-05	0.338908672	0	0	290.2769	983.7998	651.7535	2.0651	2.4062	1327	1.457062328	0.003365814	45.59210907	0.105317772
22.81516076	×ÔÉí³µÁ¾	Road 1	262.9656708	85.26186447	1.57E-05	0.335287601	0	0	290.7746	983.8174	651.7283	2.0565	2.4148	1328	1.635614042	0.003778268	45.61937635	0.105380759
22.8318442	×ÔÉí³µÁ¾	Road 1	263.3608483	85.27254181	1.57E-05	0.332149297	0	0	291.1302	983.8301	651.7102	2.0502	2.421	1329	1.434829473	0.003314456	45.64331424	0.105436056
22.8485247	×ÔÉí³µÁ¾	Road 1	263.756002	85.28239517	1.57E-05	0.330740631	0	0	291.462	983.8408	651.6934	2.0455	2.4257	1330	1.398641563	0.003230862	45.66664428	0.105489948
22.86514876	×ÔÉí³µÁ¾	Road 1	264.1498661	85.29271545	1.57E-05	0.32874614	0	0	291.8176	983.8535	651.6753	2.0393	2.4319	1331	1.420953313	0.003282402	45.69026629	0.105544515
22.88188974	×ÔÉí³µÁ¾	Road 1	264.5465781	85.30939407	1.57E-05	0.327073067	0	0	292.3867	983.873	651.6464	2.0301	2.4411	1332	1.697940881	0.003922243	45.71869149	0.105610177
22.89847934	×ÔÉí³µÁ¾	Road 1	264.939747	85.31899338	1.57E-05	0.325744182	0	0	292.7187	983.8848	651.6295	2.0245	2.4468	1333	1.390209211	0.003211383	45.74175451	0.105663453
22.91519577	×ÔÉí³µÁ¾	Road 1	265.335965	85.32832489	1.57E-05	0.325287312	0	0	293.0507	983.8965	651.6125	2.0188	2.4525	1334	1.375279648	0.003176896	45.76474427	0.105716559
22.93181396	×ÔÉí³µÁ¾	Road 1	265.7299025	85.3387207	1.57E-05	0.324295193	0	0	293.4065	983.9092	651.5945	2.0126	2.4587	1335	1.425071088	0.003291914	45.78842637	0.105771265
22.94851279	×ÔÉí³µÁ¾	Road 1	266.125817	85.35281067	1.57E-05	0.323175937	0	0	293.9047	983.9258	651.5692	2.0051	2.4663	1336	1.586182483	0.003664082	45.81491376	0.105832451
22.96526624	×ÔÉí³µÁ¾	Road 1	266.5230708	85.36234818	1.57E-05	0.323706031	0	0	294.2369	983.9375	651.5524	1.9994	2.472	1337	1.383867898	0.003196735	45.83809832	0.105886007
22.98180305	×ÔÉí³µÁ¾	Road 1	266.9152345	85.3725174	1.57E-05	0.321736902	0	0	294.5928	983.9502	651.5343	1.9932	2.4782	1338	1.417679489	0.00327484	45.86154223	0.105940163
22.99913859	×ÔÉí³µÁ¾	Road 1	267.3264064	85.3863739	1.57E-05	0.322555989	0	0	295.0912	983.9678	651.5089	1.9847	2.4867	1339	1.553886303	0.003589477	45.88847968	0.106002388
23.01520438	×ÔÉí³µÁ¾	Road 1	267.7075038	85.39576721	1.57E-05	0.322116137	0	0	295.4235	983.9795	651.4921	1.9791	2.4924	1340	1.395650839	0.003223953	45.91090192	0.106054183
23.03182221	×ÔÉí³µÁ¾	Road 1	268.1017457	85.40655441	1.57E-05	0.320947379	0	0	295.8033	983.9922	651.4728	1.9733	2.4983	1341	1.443356943	0.003334155	45.93488737	0.10610959
23.04851994	×ÔÉí³µÁ¾	Road 1	268.4979511	85.42114563	1.57E-05	0.322019339	0	0	296.3257	984.0107	651.4462	1.9643	2.5074	1342	1.609409899	0.003717737	45.96176086	0.106171668
23.06518541	×ÔÉí³µÁ¾	Road 1	268.8934345	85.43051147	1.59E-05	0.321086705	0	0	296.6581	984.0225	651.4293	1.9586	2.5131	1343	1.379348102	0.003186294	45.98474835	0.106224769
23.08195499	×ÔÉí³µÁ¾	Road 1	269.2914318	85.43984985	1.59E-05	0.32186082	0	0	296.9906	984.0332	651.4125	1.9539	2.5178	1344	1.375681071	0.003177823	46.00781794	0.106278059
23.09847164	×ÔÉí³µÁ¾	Road 1	269.6834967	85.45519638	1.59E-05	0.321426749	0	0	297.5369	984.0527	651.3846	1.9443	2.5275	1345	1.650772272	0.003813284	46.03508318	0.106341042
23.11514922	×ÔÉí³µÁ¾	Road 1	270.0794253	85.46464462	1.59E-05	0.32156688	0	0	297.8695	984.0645	651.3678	1.9386	2.5332	1346	1.383126969	0.003195023	46.05815038	0.106394327
23.13188324	×ÔÉí³µÁ¾	Road 1	270.4767373	85.473983	1.59E-05	0.321566492	0	0	298.2021	984.0762	651.3509	1.9329	2.5389	1347	1.37698476	0.003180835	46.08119287	0.106447556
23.14887055	×ÔÉí³µÁ¾	Road 1	270.8801288	85.48787384	1.59E-05	0.321259677	0	0	298.701	984.0928	651.3254	1.9254	2.5465	1348	1.568974009	0.00362433	46.10784552	0.106509123
23.16516507	×ÔÉí³µÁ¾	Road 1	271.2671111	85.49723282	1.60E-05	0.321709573	0.011764706	0	299.0338	984.1045	651.3085	1.9197	2.5522	1349	1.389332343	0.003209358	46.13048402	0.106561418
23.18188663	×ÔÉí³µÁ¾	Road 1	271.6643012	85.51143265	1.60E-05	0.321021378	0.011764706	0	299.5329	984.1221	651.2833	1.9111	2.5608	1350	1.592579933	0.00367886	46.15711444	0.106622934
23.19908837	×ÔÉí³µÁ¾	Road 1	272.0729419	85.52076416	1.62E-05	0.321140349	0.011764706	0	299.8657	984.1338	651.2664	1.9054	2.5665	1351	1.366065493	0.003155611	46.18061316	0.106677216
23.21525973	×ÔÉí³µÁ¾	Road 1	272.4571464	85.52998581	1.63E-05	0.320461333	0.011764706	0	300.1985	984.1455	651.2495	1.8997	2.5722	1352	1.386706575	0.003203292	46.20303808	0.106729018
23.23196626	×ÔÉí³µÁ¾	Road 1	272.8541335	85.54462509	1.65E-05	0.321287066	0.011764706	0	300.7216	984.1631	651.2229	1.8916	2.5803	1353	1.613089183	0.003726236	46.22998721	0.10679127
23.24913832	×ÔÉí³µÁ¾	Road 1	273.2622276	85.55403214	1.66E-05	0.320791453	0.011764706	0	301.0545	984.1748	651.2061	1.8859	2.586	1354	1.370425341	0.003165683	46.25352023	0.106845632
23.2652261	×ÔÉí³µÁ¾	Road 1	273.6445949	85.56321259	1.68E-05	0.321610957	0.011764706	0	301.3875	984.1865	651.1891	1.8803	2.5918	1355	1.387425727	0.003204953	46.27584083	0.106897192
23.28187252	×ÔÉí³µÁ¾	Road 1	274.0403076	85.5779274	1.71E-05	0.320028067	0.011764706	0	301.9107	984.2051	651.1625	1.8712	2.601	1356	1.619295584	0.003740573	46.3027963	0.106959459
23.29850134	×ÔÉí³µÁ¾	Road 1	274.4356444	85.58710785	1.73E-05	0.321926147	0.011764706	0	302.2438	984.2168	651.1456	1.8655	2.6067	1357	1.373997497	0.003173934	46.32564425	0.107012238
23.31625402	×ÔÉí³µÁ¾	Road 1	274.8577657	85.60039444	1.77E-05	0.320171535	0.011764706	0	302.7196	984.2334	651.1215	1.8576	2.6144	1358	1.519391815	0.003509795	46.35261753	0.107074546
23.3319111	×ÔÉí³µÁ¾	Road 1	275.2300979	85.60957489	1.81E-05	0.321187258	0.019607844	0	303.0528	984.2441	651.1045	1.8529	2.6191	1359	1.399628041	0.003233141	46.37453162	0.107125168
23.34850473	×ÔÉí³µÁ¾	Road 1	275.6247449	85.61896133	1.87E-05	0.320097536	0.019607844	0	303.386	984.2559	651.0875	1.8472	2.6248	1360	1.384447798	0.003198074	46.39750463	0.107178236
23.36517973	×ÔÉí³µÁ¾	Road 1	276.0213729	85.62880096	1.93E-05	0.320707887	0.019607844	0	303.743	984.2686	651.0695	1.841	2.6311	1361	1.402638962	0.003240096	46.42089365	0.107232264
23.38189323	×ÔÉí³µÁ¾	Road 1	276.4189841	85.64339218	1.98E-05	0.320237279	0.019607844	0	304.2667	984.2871	651.0428	1.8319	2.6402	1362	1.61220695	0.003724198	46.44783926	0.107294509
23.39853304	×ÔÉí³µÁ¾	Road 1	276.8148859	85.65276489	2.05E-05	0.320371151	0.019607844	0	304.5999	984.2988	651.0259	1.8263	2.6458	1363	1.383103007	0.003194968	46.47085384	0.107347672
23.41516846	×ÔÉí³µÁ¾	Road 1	277.2107254	85.66195221	2.12E-05	0.321006864	0.019607844	0	304.9333	984.3096	651.0089	1.8216	2.6505	1364	1.375080146	0.003176435	46.49372887	0.107400514
23.43200988	×ÔÉí³µÁ¾	Road 1	277.6115345	85.67641983	2.19E-05	0.320761114	0.019607844	0	305.4572	984.3281	650.9823	1.8125	2.6596	1365	1.602370541	0.003701476	46.52071507	0.107462852
23.44848292	×ÔÉí³µÁ¾	Road 1	278.0036197	85.6859024	2.24E-05	0.320227295	0.019607844	0	305.7906	984.3398	650.9653	1.8068	2.6653	1366	1.392682811	0.003217097	46.54365678	0.107515847
23.4652272	×ÔÉí³µÁ¾	Road 1	278.4022254	85.69970398	2.29E-05	0.320037305	0.019607844	0	306.2908	984.3574	650.9399	1.7983	2.6738	1367	1.576960113	0.003642778	46.57006185	0.107576843
23.48179224	×ÔÉí³µÁ¾	Road 1	278.7966071	85.70908356	2.31E-05	0.319737136	0.011764706	0	306.6244	984.3691	650.923	1.7927	2.6794	1368	1.386005446	0.003201673	46.59302108	0.107629879
23.49847348	×ÔÉí³µÁ¾	Road 1	279.1937982	85.71834641	2.36E-05	0.320100933	0.011764706	0	306.9579	984.3809	650.9061	1.787	2.6851	1369	1.378018047	0.003183222	46.61600813	0.107682979
23.51514555	×ÔÉí³µÁ¾	Road 1	279.590835	85.73213425	2.36E-05	0.319891334	0.011764706	0	307.4583	984.3975	650.8806	1.7795	2.6926	1370	1.579478022	0.003648594	46.6423413	0.107743808
23.54851206	×ÔÉí³µÁ¾	Road 1	280.3856073	85.75006256	2.36E-05	0.319991529	0.011764706	0	308.1018	984.4199	650.848	1.7687	2.7034	1371	1.365080317	0.003153336	46.68788926	0.107849024
23.565168	×ÔÉí³µÁ¾	Road 1	280.7824094	85.76444092	2.36E-05	0.319307983	0.011764706	0	308.6263	984.4385	650.8213	1.7597	2.7125	1372	1.606826747	0.00371177	46.71465248	0.107910847
23.5819922	×ÔÉí³µÁ¾	Road 1	281.1832666	85.77443161	2.36E-05	0.319001973	0.011764706	0	308.9839	984.4512	650.8031	1.7535	2.7187	1373	1.407290726	0.003250842	46.73832902	0.10796554
23.59848172	×ÔÉí³µÁ¾	Road 1	281.576192	85.78363953	2.36E-05	0.319008619	0.011764706	0	309.3177	984.4629	650.7862	1.7478	2.7244	1374	1.381155531	0.003190469	46.76110362	0.108018149
23.61515416	×ÔÉí³µÁ¾	Road 1	281.9735396	85.79735184	2.36E-05	0.319141686	0.011764706	0	309.8185	984.4795	650.7607	1.7402	2.7319	1375	1.577079411	0.003643053	46.78739738	0.108078888
23.6318244	×ÔÉí³µÁ¾	Road 1	282.3708808	85.80730133	2.36E-05	0.3184627	0.011764706	0	310.1762	984.4922	650.7426	1.7339	2.7381	1376	1.409949131	0.003256982	46.81090157	0.108133183
23.64854633	×ÔÉí³µÁ¾	Road 1	282.7694966	85.81649551	2.36E-05	0.319271445	0.011764706	0	310.5102	984.5039	650.7256	1.7281	2.7437	1377	1.375205482	0.003176725	46.83389765	0.108186304
23.6651198	×ÔÉí³µÁ¾	Road 1	283.1646371	85.83027649	2.36E-05	0.318362534	0.011764706	0	311.0112	984.5215	650.7002	1.7196	2.7522	1378	1.584284768	0.003659698	46.86015475	0.108246957
23.68183439	×ÔÉí³µÁ¾	Road 1	283.5631846	85.83943634	2.36E-05	0.317893058	0.019607844	0	311.3452	984.5332	650.6832	1.7141	2.7579	1379	1.374148241	0.003174282	46.88312308	0.108300014
23.69850353	×ÔÉí³µÁ¾	Road 1	283.9606909	85.84860306	2.36E-05	0.318249404	0.019607844	0	311.6793	984.5449	650.6663	1.7085	2.7636	1380	1.375677101	0.003177814	46.90605444	0.108352986
23.71524672	×ÔÉí³µÁ¾	Road 1	284.3600273	85.8624527	2.36E-05	0.317999125	0.019607844	0	312.1804	984.5625	650.6407	1.7001	2.7721	1381	1.581555195	0.003653393	46.93253471	0.108414155
23.73182605	×ÔÉí³µÁ¾	Road 1	284.7555004	85.87216873	2.36E-05	0.318608671	0.019607844	0	312.5385	984.5742	650.6226	1.6949	2.7773	1382	1.402768009	0.003240394	46.95579167	0.108467879
23.74849849	×ÔÉí³µÁ¾	Road 1	285.153237	85.88134918	2.36E-05	0.319012344	0.019607844	0	312.8727	984.5859	650.6056	1.6892	2.7829	1383	1.376617924	0.003179987	46.97874325	0.108520897
23.76513245	×ÔÉí³µÁ¾	Road 1	285.5501188	85.89508209	2.36E-05	0.318512589	0.019607844	0	313.374	984.6035	650.5801	1.6808	2.7914	1384	1.580865794	0.0036518	47.00503929	0.108581641
23.78178216	×ÔÉí³µÁ¾	Road 1	285.9474192	85.90426254	2.36E-05	0.318921775	0.019607844	0	313.7083	984.6152	650.5631	1.6751	2.7969	1385	1.377463124	0.00318194	47.02797366	0.108634619
23.79849675	×ÔÉí³µÁ¾	Road 1	286.3463104	85.91343613	2.36E-05	0.318472654	0.019607844	0	314.0426	984.627	650.5461	1.6695	2.8024	1386	1.375684204	0.003177831	47.05096766	0.108687735
23.81518789	×ÔÉí³µÁ¾	Road 1	286.7447081	85.92775269	2.36E-05	0.318668157	0.019607844	0	314.5681	984.6455	650.5195	1.6605	2.8111	1387	1.605214993	0.003708047	47.07776052	0.108749627
23.8318464	×ÔÉí³µÁ¾	Road 1	287.14237	85.9370224	2.36E-05	0.318382502	0.019607844	0	314.9025	984.6572	650.5025	1.6548	2.817	1388	1.381636897	0.003191581	47.10077653	0.108802794
23.84845689	×ÔÉí³µÁ¾	Road 1	287.5389486	85.95068665	2.36E-05	0.318122625	0.019607844	0	315.4041	984.6738	650.477	1.6474	2.8247	1389	1.579490995	0.003648624	47.12701266	0.108863399
23.8651154	×ÔÉí³µÁ¾	Road 1	287.9367161	85.9598465	2.36E-05	0.318978339	0.019607844	0	315.7386	984.6855	650.46	1.6417	2.8305	1390	1.377025503	0.003180929	47.14995185	0.108916389
23.88338016	×ÔÉí³µÁ¾	Road 1	288.3729071	85.97361374	2.36E-05	0.318028301	0.019607844	0	316.2404	984.7031	650.4344	1.6333	2.8389	1391	1.5286687	0.003531225	47.17787262	0.108980886
23.89845881	×ÔÉí³µÁ¾	Road 1	288.7330477	85.98289719	2.36E-05	0.31905812	0.019607844	0	316.575	984.7148	650.4175	1.6276	2.8446	1392	1.426210842	0.003294547	47.19937796	0.109030563
23.91511219	×ÔÉí³µÁ¾	Road 1	289.1308409	85.99187851	2.36E-05	0.318598688	0.019607844	0	316.9097	984.7266	650.4005	1.622	2.8502	1393	1.369586986	0.003163746	47.22218621	0.10908325
23.93184768	×ÔÉí³µÁ¾	Road 1	289.5306414	86.00179367	2.36E-05	0.31921196	0.019607844	0	317.2682	984.7393	650.3823	1.6158	2.8564	1394	1.409211169	0.003255278	47.24577004	0.109137729
23.94851206	×ÔÉí³µÁ¾	Road 1	289.9287857	86.01098099	2.36E-05	0.319167525	0.019607844	0	317.6029	984.751	650.3652	1.6102	2.862	1395	1.378747331	0.003184906	47.26874601	0.109190803
23.96515591	×ÔÉí³µÁ¾	Road 1	290.3265151	86.02734375	2.40E-05	0.318708479	0.019607844	0	318.2007	984.7715	650.335	1.6005	2.8717	1396	1.699922701	0.003926821	47.29703926	0.109256161
23.98188699	×ÔÉí³µÁ¾	Road 1	290.726372	86.0365242	2.43E-05	0.318632364	0.019607844	0	318.5355	984.7832	650.3179	1.5949	2.8773	1397	1.377128182	0.003181166	47.32008012	0.109309385
23.99921374	×ÔÉí³µÁ¾	Road 1	291.1405094	86.04586945	2.53E-05	0.318562508	0.019607844	0	318.8703	984.7949	650.3009	1.5892	2.8829	1398	1.370290781	0.003165372	47.34382279	0.109364231
24.01663358	×ÔÉí³µÁ¾	Road 1	291.5569441	86.06072845	2.71E-05	0.318568766	0.019607844	0	319.4205	984.8135	650.2729	1.5807	2.8915	1399	1.603706959	0.003704563	47.37175912	0.109428764
24.03239073	×ÔÉí³µÁ¾	Road 1	291.9336707	86.06988144	2.93E-05	0.318491876	0.019607844	0	319.7554	984.8252	650.2559	1.575	2.8971	1400	1.40147466	0.003237406	47.39384237	0.109479776
24.04849978	×ÔÉí³µÁ¾	Road 1	292.318852	86.07914429	3.31E-05	0.318658203	0.019607844	0	320.0904	984.8369	650.2389	1.5694	2.9028	1401	1.397227238	0.003227595	47.41635036	0.109531769
24.06517478	×ÔÉí³µÁ¾	Road 1	292.7176296	86.09288406	3.71E-05	0.318612397	0.019607844	0	320.5929	984.8545	650.2134	1.561	2.9112	1402	1.582609661	0.003655828	47.44274039	0.10959273
24.08189781	×ÔÉí³µÁ¾	Road 1	293.1175976	86.10194092	4.25E-05	0.318801999	0.019607844	0	320.9279	984.8662	650.1964	1.5553	2.9168	1403	1.372645225	0.00317081	47.46569517	0.109645756
24.09846248	×ÔÉí³µÁ¾	Road 1	293.5138209	86.11120377	4.87E-05	0.318088591	0.019607844	0	321.2631	984.8779	650.1793	1.5497	2.9225	1404	1.385866539	0.003201352	47.48865159	0.109698785
24.11514738	×ÔÉí³µÁ¾	Road 1	293.9129837	86.12492981	5.73E-05	0.318478942	0.019607844	0	321.7657	984.8955	650.1538	1.5413	2.9309	1405	1.58211084	0.003654676	47.51504896	0.109759763
24.13188104	×ÔÉí³µÁ¾	Road 1	294.3133549	86.1339798	6.56E-05	0.318687737	0.019607844	0	322.1009	984.9072	650.1367	1.5356	2.9366	1406	1.372482878	0.003170435	47.53801561	0.109812816
24.14847907	×ÔÉí³µÁ¾	Road 1	294.7105238	86.14323578	7.53E-05	0.318398744	0.019607844	0	322.4362	984.9189	650.1198	1.5299	2.9422	1407	1.385125972	0.003199641	47.56100597	0.109865924
24.16512438	×ÔÉí³µÁ¾	Road 1	295.1088897	86.15740814	8.67E-05	0.317979187	0.019607844	0	322.963	984.9375	650.093	1.5209	2.9512	1408	1.604012354	0.003705269	47.58770527	0.109927599
24.18191339	×ÔÉí³µÁ¾	Road 1	295.510738	86.16675339	9.74E-05	0.318308502	0.011764706	0	323.2983	984.9492	650.0759	1.5152	2.9568	1409	1.384657629	0.003198559	47.61095229	0.1099813
24.19848832	×ÔÉí³µÁ¾	Road 1	295.9075258	86.18047256	0.000109679	0.317419142	0.011764706	0	323.8013	984.9658	650.0504	1.5077	2.9642	1410	1.586693842	0.003665263	47.63725164	0.110042051
24.21754044	×ÔÉí³µÁ¾	Road 1	296.3636592	86.18884277	0.000123206	0.318458617	0.011764706	0	324.1127	984.9775	650.0345	1.5016	2.9703	1411	1.297574702	0.002997398	47.66197319	0.110099158
24.23258428	×ÔÉí³µÁ¾	Road 1	296.7238696	86.19862061	0.000135374	0.317132682	0	0	324.4721	984.9893	650.0162	1.4964	2.9755	1412	1.454575797	0.00336007	47.68385558	0.110149706
24.24847742	×ÔÉí³µÁ¾	Road 1	297.1044795	86.2130127	0.000149346	0.317239136	0	0	324.9993	985.0078	649.9895	1.4874	2.9845	1413	1.645172628	0.003800349	47.71000254	0.110210106
24.2651176	×ÔÉí³µÁ¾	Road 1	297.5030211	86.22199402	0.000161518	0.317039579	0	0	325.3348	985.0195	649.9725	1.4817	2.9901	1414	1.372767935	0.003171094	47.73284565	0.110262873
24.31528814	×ÔÉí³µÁ¾	Road 1	298.7050003	86.24832687	0.000173762	0.315790147	0	0	326.3176	985.0537	649.9225	1.4653	3.0064	1415	1.361973235	0.003146158	47.80117659	0.110420718
24.33183962	×ÔÉí³µÁ¾	Road 1	299.1016134	86.26464844	0.000186013	0.254876673	0	0.011764706	326.965	985.0762	649.8896	1.4546	3.0171	1416	1.706019158	0.003940904	47.82941372	0.110485946
24.34845561	×ÔÉí³µÁ¾	Road 1	299.4997881	86.26801987	0.000229265	0.171243474	0	0.011764706	327.3007	985.0879	649.8726	1.4489	3.0227	1417	1.122239797	0.002592374	47.84806085	0.110529021
24.36657228	×ÔÉí³µÁ¾	Road 1	299.9339371	86.27063599	0.000249012	0.199913919	0	0.011764706	327.8043	985.1055	649.847	1.4404	3.0312	1418	1.078652402	0.002491687	47.86760244	0.110574162
24.38369595	×ÔÉí³µÁ¾	Road 1	300.3443138	86.27565536	0.000268716	0.254065782	0	0.011764706	328.14	985.1172	649.83	1.4348	3.0368	1419	1.189578316	0.002747926	47.88797239	0.110621216
24.39855687	×ÔÉí³µÁ¾	Road 1	300.7004872	86.28161545	0.000293457	0.254061639	0	0.011764706	328.4758	985.1289	649.8129	1.4291	3.0424	1420	1.270114847	0.002933965	47.90684746	0.110664818
24.41517176	×ÔÉí³µÁ¾	Road 1	301.0987284	86.28816605	0.000320958	0.198362753	0	0.011764706	328.9795	985.1465	649.7873	1.4207	3.0508	1421	1.265119292	0.002922426	47.92786728	0.110713373
24.43189112	×ÔÉí³µÁ¾	Road 1	301.4994877	86.29120789	0.000350581	0.19854261	0	0.011764706	329.3153	985.1582	649.7703	1.415	3.0564	1422	1.10682533	0.002556767	47.94637269	0.110756121
24.44851224	×ÔÉí³µÁ¾	Road 1	301.8979098	86.29498444	0.000382937	0.223925516	0	0.011764706	329.6511	985.1699	649.7532	1.4094	3.0621	1423	1.140626358	0.002634847	47.96533118	0.110799915
24.46511833	×ÔÉí³µÁ¾	Road 1	302.2960066	86.302565	0.000423906	0.232545361	0	0.011764706	330.1788	985.1875	649.7263	1.4013	3.0701	1424	1.311690993	0.003030006	47.98711324	0.110850232
24.48181533	×ÔÉí³µÁ¾	Road 1	302.6963033	86.30701447	0.000464945	0.215026736	0	0.011764706	330.5147	985.1992	649.7093	1.3957	3.0757	1425	1.170031331	0.002702772	48.00664925	0.11089536
24.49848594	×ÔÉí³µÁ¾	Road 1	303.0959842	86.31066742	0.000508551	0.207171649	0	0.011764706	330.8506	985.2109	649.6922	1.39	3.0813	1426	1.134746226	0.002621264	48.02556616	0.110939058
24.51510633	×ÔÉí³µÁ¾	Road 1	303.4944879	86.31646271	0.000561629	0.221092373	0	0.011764706	331.3544	985.2285	649.6666	1.3815	3.0897	1427	1.231441624	0.00284463	48.0460332	0.110986337
24.53185318	×ÔÉí³µÁ¾	Road 1	303.8960442	86.32086411	0.000611656	0.225082964	0	0.011764706	331.6903	985.2402	649.6496	1.3759	3.0953	1428	1.167438265	0.002696782	48.06558412	0.111031499
24.54851536	×ÔÉí³µÁ¾	Road 1	304.2955991	86.32711945	0.000665965	0.219976172	0	0.011764706	332.1942	985.2578	649.624	1.3675	3.1037	1429	1.251501331	0.002890968	48.08643685	0.111079669
24.56512328	×ÔÉí³µÁ¾	Road 1	304.693871	86.33099899	0.00073975	0.213256091	0	0.011764706	332.5302	985.2695	649.6069	1.3619	3.1094	1430	1.145738553	0.002646656	48.10546519	0.111123625
24.58182688	×ÔÉí³µÁ¾	Road 1	305.094457	86.33528366	0.000813994	0.216144592	0	0.011764706	332.8901	985.2822	649.5886	1.3557	3.1155	1431	1.16287717	0.002686246	48.12488942	0.111168495
24.59847183	×ÔÉí³µÁ¾	Road 1	305.4936647	86.34136047	0.000894747	0.219465479	0	0.011764706	333.3941	985.2998	649.563	1.3473	3.1239	1432	1.243945751	0.002873515	48.14559484	0.111216324
24.61518715	×ÔÉí³µÁ¾	Road 1	305.8945794	86.34548035	0.000992466	0.217383146	0	0.011764706	333.7302	985.3115	649.5459	1.3417	3.1295	1433	1.155488449	0.002669178	48.1649092	0.11126094
24.63189295	×ÔÉí³µÁ¾	Road 1	306.295284	86.34946976	0.001079616	0.215215519	0	0.011764706	334.0662	985.3223	649.5289	1.337	3.1342	1434	1.149805548	0.002656051	48.18411762	0.111305312
24.64846935	×ÔÉí³µÁ¾	Road 1	306.6929135	86.35567017	0.001170708	0.215058312	0	0.011764706	334.5942	985.3408	649.502	1.3281	3.1431	1435	1.250792816	0.002889331	48.20485127	0.111353206
24.66509927	×ÔÉí³µÁ¾	Road 1	307.0918459	86.35979004	0.001264641	0.217173919	0	0.011764706	334.9303	985.3525	649.485	1.3225	3.1488	1436	1.156574917	0.002671688	48.22408501	0.111397636
24.68189084	×ÔÉí³µÁ¾	Road 1	307.4946753	86.36392365	0.00134777	0.215975165	0	0.011764706	335.2664	985.3643	649.4679	1.3168	3.1544	1437	1.155446305	0.002669081	48.24348677	0.111442454
24.69849144	×ÔÉí³µÁ¾	Road 1	307.8929411	86.36779633	0.00142865	0.214891553	0	0.011764706	335.6025	985.376	649.4508	1.3112	3.16	1438	1.145867322	0.002646954	48.26250885	0.111486395
24.71509607	×ÔÉí³µÁ¾	Road 1	308.2913321	86.37398987	0.001517533	0.214915454	0	0.011764706	336.1307	985.3936	649.424	1.3032	3.168	1439	1.250211287	0.002887988	48.28326814	0.111534349
24.73185831	×ÔÉí³µÁ¾	Road 1	308.693523	86.37786942	0.001580032	0.216426313	0	0.011764706	336.4668	985.4053	649.4069	1.2976	3.1737	1440	1.144592399	0.002644008	48.30245408	0.111578669
24.74844754	×ÔÉí³µÁ¾	Road 1	309.09159	86.38382263	0.001634042	0.215503514	0	0.011764706	336.9711	985.4229	649.3813	1.2892	3.1821	1441	1.239763794	0.002863854	48.32302081	0.111626178
24.76514161	×ÔÉí³µÁ¾	Road 1	309.4921908	86.38775024	0.001685376	0.215044364	0	0.011764706	337.3073	985.4346	649.3641	1.2836	3.1878	1442	1.147544057	0.002650827	48.34217799	0.111670431
24.78192622	×ÔÉí³µÁ¾	Road 1	309.8949831	86.39180145	0.001715374	0.215239421	0	0.011764706	337.6435	985.4463	649.3471	1.278	3.1934	1443	1.152133753	0.002661429	48.3615161	0.111715102
24.79846156	×ÔÉí³µÁ¾	Road 1	310.2918119	86.3957428	0.001732486	0.214770675	0	0.011764706	337.9797	985.457	649.33	1.2734	3.1981	1444	1.149928609	0.002656335	48.38053057	0.111759026
24.81513437	×ÔÉí³µÁ¾	Road 1	310.6919694	86.40218353	0.001739098	0.214741573	0	0.011764706	338.532	985.4766	649.302	1.2639	3.2086	1445	1.260452186	0.002911645	48.40154585	0.111807571
24.83179655	×ÔÉí³µÁ¾	Road 1	311.0918908	86.40629654	0.001739098	0.214967281	0	0.011764706	338.8923	985.4883	649.2836	1.2587	3.2138	1446	1.156370371	0.002671216	48.42081349	0.111852079
24.84848878	×ÔÉí³µÁ¾	Road 1	311.4925521	86.41029968	0.001739098	0.213868245	0	0.011764706	339.2286	985.5	649.2665	1.2531	3.2195	1447	1.151163433	0.002659188	48.44002898	0.111896467
24.8651352	×ÔÉí³µÁ¾	Road 1	311.8921326	86.41439209	0.001739098	0.214933857	0	0.011764706	339.5889	985.5127	649.2483	1.2469	3.2256	1448	1.155701065	0.002669669	48.45926726	0.111940907
24.88183476	×ÔÉí³µÁ¾	Road 1	312.2930161	86.42024918	0.001735129	0.214470476	0	0.011764706	340.0934	985.5293	649.2226	1.2395	3.2331	1449	1.234090527	0.002850749	48.47987604	0.111988514
24.89845038	×ÔÉí³µÁ¾	Road 1	312.6919116	86.42611313	0.001721943	0.214661554	0	0.011764706	340.5978	985.5469	649.197	1.2311	3.2416	1450	1.235785907	0.002854665	48.50040939	0.112035946
24.91508104	×ÔÉí³µÁ¾	Road 1	313.0911864	86.43010941	0.001706207	0.214188695	0	0.011764706	340.9342	985.5586	649.1799	1.2255	3.2472	1451	1.151713466	0.002660458	48.51956314	0.112080191
24.9318979	×ÔÉí³µÁ¾	Road 1	313.49495	86.43400955	0.001693168	0.214620039	0	0.011764706	341.2706	985.5703	649.1628	1.2199	3.2529	1452	1.145494801	0.002646093	48.53882677	0.11212469
24.94845891	×ÔÉí³µÁ¾	Road 1	313.8925969	86.43973618	0.001682784	0.214387253	0	0.011764706	341.7751	985.5869	649.1372	1.2125	3.2604	1453	1.230608796	0.002842706	48.55920689	0.112171768
24.96514528	×ÔÉí³µÁ¾	Road 1	314.293272	86.44362946	0.001671154	0.214408487	0	0.011764706	342.1115	985.5986	649.1201	1.2068	3.267	1454	1.146636388	0.00264873	48.57834008	0.112215966
24.98185107	×ÔÉí³µÁ¾	Road 1	314.6944321	86.447612	0.00166343	0.213667169	0	0.011764706	342.4479	985.6094	649.1029	1.2022	3.2716	1455	1.150464364	0.002657573	48.59755951	0.112260362
24.99844397	×ÔÉí³µÁ¾	Road 1	315.0928997	86.45166321	0.00165573	0.214779288	0	0.011764706	342.8084	985.6221	649.0847	1.196	3.2778	1456	1.154807594	0.002667606	48.61672111	0.112304626
25.01514903	×ÔÉí³µÁ¾	Road 1	315.4940907	86.45806274	0.001649331	0.213862151	0	0.011764706	343.3612	985.6406	649.0565	1.1875	3.2864	1457	1.258673469	0.002907536	48.63774733	0.112353196
25.03188195	×ÔÉí³µÁ¾	Road 1	315.8959695	86.46210709	0.001646776	0.214533404	0	0.011764706	343.7217	985.6533	649.0382	1.1813	3.2926	1458	1.153077663	0.002663609	48.65704169	0.112397766
25.04847302	×ÔÉí³µÁ¾	Road 1	316.294458	86.46573257	0.0016455	0.190680698	0	0.019607844	344.0582	985.6641	649.0211	1.1766	3.2972	1459	1.135793962	0.002623684	48.67588572	0.112441296
25.06510917	×ÔÉí³µÁ¾	Road 1	316.6940193	86.46356277	0.0016455	0.005412579	0	0.035294119	344.5629	985.6816	648.9955	1.1682	3.3057	1460	0.972494377	0.002246462	48.69206428	0.112478668
25.08187288	×ÔÉí³µÁ¾	Road 1	317.0965908	86.45204773	0.0016455	-0.154364452	0	0.05882353	344.9234	985.6934	648.9772	1.163	3.3109	1461	0.972404816	0.002246255	48.7083654	0.112516324
25.09850353	×ÔÉí³µÁ¾	Road 1	317.4958763	86.432444	0.0016455	-0.354662597	0	0.090196081	345.2598	985.7051	648.9601	1.1574	3.3165	1462	0.972252342	0.002245903	48.72453459	0.112553675
25.11516718	×ÔÉí³µÁ¾	Road 1	317.8957178	86.38143311	0.0016455	-0.668045819	0	0.105882354	345.7642	985.7217	648.9344	1.1499	3.325	1463	0.971855591	0.002244986	48.74072924	0.112591085
25.13182789	×ÔÉí³µÁ¾	Road 1	318.2952974	86.34005585	0.001642949	-0.682804525	0	0.121568628	346.1003	985.7334	648.9174	1.1452	3.3305	1464	0.971533768	0.002244243	48.75691569	0.112628475
25.14859746	×ÔÉí³µÁ¾	Road 1	318.6971877	86.27557983	0.001642949	-0.803221345	0	0.145098045	346.6041	985.75	648.8917	1.1378	3.338	1465	0.971032288	0.002243085	48.77319949	0.112666091
25.1984678	×ÔÉí³µÁ¾	Road 1	319.8897997	86.09133224	0.001635312	-1.094233274	0	0.168627456	347.6343	985.7842	648.8394	1.1222	3.3533	1466	0.969599251	0.002239774	48.82155372	0.112777789
25.21513474	×ÔÉí³µÁ¾	Road 1	320.2879791	86.00533676	0.001630235	-0.969061196	0	0.176470593	348.1366	985.8008	648.8138	1.1147	3.3608	1467	0.968930397	0.002238229	48.83770283	0.112815094
25.23186693	×ÔÉí³µÁ¾	Road 1	320.6874403	85.94572906	0.001607514	-1.165047884	0	0.20784314	348.4712	985.8125	648.7969	1.1091	3.3664	1468	0.968466782	0.002237158	48.8539074	0.112852526
25.24845359	×ÔÉí³µÁ¾	Road 1	321.0828806	85.82707672	0.001598735	-1.606371641	0	0.215686277	348.9726	985.8291	648.7714	1.1015	3.3748	1469	0.96754393	0.002235026	48.86995573	0.112889598
25.26516012	×ÔÉí³µÁ¾	Road 1	321.4807758	85.74030533	0.001589989	-1.527502298	0	0.215686277	349.3064	985.8398	648.7544	1.0968	3.3795	1470	0.966869041	0.002233467	48.88610875	0.112926911
25.28455241	×ÔÉí³µÁ¾	Road 1	321.9421328	85.64668808	0.001582517	-1.290774822	0	0.215686277	349.7114	985.8535	648.7338	1.0905	3.3858	1471	0.966140907	0.002231785	48.90484443	0.112970191
25.29907829	×ÔÉí³µÁ¾	Road 1	322.2874276	85.5755928	0.00157383	-1.288393617	0	0.215686277	350.0445	985.8643	648.7169	1.0857	3.3904	1472	0.965587944	0.002230508	48.91887045	0.113002591
25.31510156	×ÔÉí³µÁ¾	Road 1	322.6678068	85.46103287	0.00156888	-1.44963634	0	0.215686277	350.5438	985.8809	648.6915	1.0782	3.3979	1473	0.964696922	0.00222845	48.93432805	0.113038298
25.33185978	×ÔÉí³µÁ¾	Road 1	323.065234	85.37531891	0.001562708	-1.436571598	0	0.215686277	350.8999	985.8926	648.6734	1.0729	3.4031	1474	0.964030258	0.00222691	48.95048348	0.113075617
25.34841052	×ÔÉí³µÁ¾	Road 1	323.457384	85.2976799	0.001562708	-1.375100374	0	0.215686277	351.232	985.9043	648.6565	1.0673	3.4088	1475	0.963426399	0.002225515	48.9664289	0.113112451
25.3650639	×ÔÉí³µÁ¾	Road 1	323.8514086	85.17720795	0.001560243	-1.438120008	0	0.223529413	351.7533	985.9209	648.63	1.0602	3.4159	1476	0.962489395	0.002223351	48.9824576	0.113149477
25.38181405	×ÔÉí³µÁ¾	Road 1	324.2473417	85.09530487	0.001559012	-1.527915597	0	0.23137255	352.0846	985.9316	648.6132	1.0555	3.4216	1477	0.961852371	0.002221879	48.99856877	0.113186694
25.40004765	×ÔÉí³µÁ¾	Road 1	324.6776857	84.96613312	0.001559012	-1.603402615	0	0.239215687	352.581	985.9482	648.588	1.0479	3.4292	1478	0.960847702	0.002219558	49.01608849	0.113227164
25.41505483	×ÔÉí³µÁ¾	Road 1	325.0315118	84.87764511	0.001559012	-1.641681314	0	0.247058824	352.9115	985.959	648.5712	1.0432	3.4339	1479	0.960159462	0.002217968	49.03049777	0.11326045
25.43187866	×ÔÉí³µÁ¾	Road 1	325.4277455	84.78696671	0.001559012	-1.672228932	0	0.247058824	353.2416	985.9707	648.5544	1.0375	3.4397	1480	0.959454185	0.002216339	49.04663946	0.113297737
25.4493139	×ÔÉí³µÁ¾	Road 1	325.8377087	84.64851837	0.001559012	-1.744722962	0	0.262745112	353.7361	985.9863	648.5293	1.0309	3.4464	1481	0.958377365	0.002213852	49.063349	0.113336336
25.46563188	×ÔÉí³µÁ¾	Road 1	326.2209615	84.55152283	0.001559012	-1.831657887	0	0.270588249	354.0654	985.9971	648.5125	1.0262	3.4512	1482	0.957622955	0.002212109	49.07897548	0.113372433
25.48177721	×ÔÉí³µÁ¾	Road 1	326.5996685	84.44208527	0.001559012	-1.960398078	0	0.294117659	354.4177	986.0088	648.4946	1.0209	3.4565	1483	0.956771774	0.002210143	49.09442287	0.113408117
25.49843975	×ÔÉí³µÁ¾	Road 1	326.9897296	84.27404938	0.001559012	-2.126787424	0	0.301960796	354.9102	986.0254	648.4696	1.0133	3.4642	1484	0.955464828	0.002207124	49.11034335	0.113444893
25.51513345	×ÔÉí³µÁ¾	Road 1	327.3799786	84.15727844	0.001559012	-2.185244083	0	0.309803933	355.2379	986.0361	648.4529	1.0085	3.469	1485	0.95455661	0.002205026	49.12627843	0.113481703
25.53183375	×ÔÉí³µÁ¾	Road 1	327.7698064	84.0332222	0.001559012	-2.164012671	0	0.31764707	355.5885	986.0469	648.4351	1.0042	3.4744	1486	0.953591728	0.002202797	49.1422037	0.113518491
25.54851829	×ÔÉí³µÁ¾	Road 1	328.1584523	83.85760574	0.001559012	-2.19463706	0	0.31764707	356.0786	986.0635	648.4102	0.9965	3.4821	1487	0.952225822	0.002199642	49.15809114	0.113555191
25.56513318	×ÔÉí³µÁ¾	Road 1	328.5449311	83.73955765	0.001559012	-2.206243515	0	0.31764707	356.4047	986.0732	648.3936	0.9927	3.486	1488	0.951307671	0.002197521	49.17389702	0.113591702
25.58179169	×ÔÉí³µÁ¾	Road 1	328.9318034	83.60533218	0.001559012	-2.183847427	0	0.31764707	356.7768	986.0859	648.3747	0.9868	3.4919	1489	0.950263695	0.002195109	49.18972699	0.113628269
25.59848356	×ÔÉí³µÁ¾	Road 1	329.3189112	83.48905563	0.001559012	-2.156405449	0	0.309803933	357.102	986.0967	648.3582	0.982	3.4968	1490	0.949359322	0.00219302	49.20557357	0.113664875
25.61652728	×ÔÉí³µÁ¾	Road 1	329.7364926	83.31389236	0.001565175	-1.97567451	0	0.294117659	357.612	986.1133	648.3322	0.9747	3.5042	1491	0.947996941	0.002189873	49.22267897	0.113704388
25.63335331	×ÔÉí³µÁ¾	Road 1	330.1254131	83.21117706	0.001576309	-1.834049225	0	0.270588249	357.936	986.123	648.3157	0.9708	3.5081	1492	0.947198044	0.002188027	49.23861655	0.113741204
25.64982818	×ÔÉí³µÁ¾	Road 1	330.5057537	83.11002045	0.001592485	-1.658417463	0	0.254901975	358.2827	986.1348	648.2981	0.9654	3.5135	1493	0.94641127	0.00218621	49.25420855	0.113777222
25.66569639	×ÔÉí³µÁ¾	Road 1	330.8715295	82.98303909	0.001612545	-1.442130923	0	0.23137255	358.7675	986.1504	648.2734	0.9585	3.5213	1494	0.945423637	0.002183929	49.26921074	0.113811877
25.68177245	×ÔÉí³µÁ¾	Road 1	331.2417541	82.90645065	0.001640401	-1.336275101	0	0.20784314	359.0903	986.1611	648.2571	0.9536	3.5262	1495	0.94482795	0.002182553	49.28439984	0.113846964
25.6992942	×ÔÉí³µÁ¾	Road 1	331.6449307	82.83624115	0.00166343	-1.171547413	0	0.184313729	359.4128	986.1709	648.2407	0.9497	3.5302	1496	0.944281876	0.002181291	49.30094531	0.113885184
25.71567083	×ÔÉí³µÁ¾	Road 1	332.0213368	82.7436264	0.001691867	-0.962197781	0	0.176470593	359.9192	986.1875	648.2149	0.9423	3.5376	1497	0.943561539	0.002179627	49.31639767	0.113920879
25.73347189	×ÔÉí³µÁ¾	Road 1	332.430209	82.68830338	0.001728527	-0.969458938	0	0.160784319	360.2411	986.1982	648.1985	0.9384	3.5425	1498	0.943131248	0.002178633	49.33318641	0.113959661
25.74842812	×ÔÉí³µÁ¾	Road 1	332.77351	82.63339233	0.001760368	-0.922820568	0	0.152941182	360.5628	986.208	648.1822	0.9344	3.5465	1499	0.942704163	0.002177647	49.34728571	0.11399223
25.76512072	×ÔÉí³µÁ¾	Road 1	333.1563327	82.56123962	0.001799362	-0.71235162	0	0.137254909	361.045	986.2236	648.1577	0.9275	3.5534	1500	0.942142975	0.00217635	49.36301252	0.114028559
25.78179682	×ÔÉí³µÁ¾	Road 1	333.5385916	82.52119446	0.001833435	-0.628865719	0	0.129411772	361.3662	986.2344	648.1414	0.9226	3.5583	1501	0.941831512	0.002175631	49.3787186	0.11406484
25.79843077	×ÔÉí³µÁ¾	Road 1	333.9196187	82.46371536	0.001867937	-0.627473354	0	0.121568628	361.8477	986.249	648.1169	0.9166	3.5642	1502	0.941384453	0.002174598	49.39437755	0.114101012
25.81512887	×ÔÉí³µÁ¾	Road 1	334.3019371	82.42533188	0.001900057	-0.63368398	0	0.121568628	362.1686	986.2598	648.1005	0.9117	3.5701	1503	0.941085915	0.002173908	49.41009189	0.114137312
25.83179325	×ÔÉí³µÁ¾	Road 1	334.6833053	82.3868454	0.001942505	-0.610102534	0	0.113725491	362.4893	986.2695	648.0842	0.9077	3.574	1504	0.940786575	0.002173217	49.42576951	0.114173528
25.84841547	×ÔÉí³µÁ¾	Road 1	335.0634713	82.33543625	0.001975472	-0.477180809	0	0.105882354	362.9701	986.2852	648.0598	0.9008	3.5809	1505	0.940386726	0.002172293	49.44140083	0.114209636
25.86519934	×ÔÉí³µÁ¾	Road 1	335.4471974	82.30602036	0.002011728	-0.442558885	0	0.105882354	363.2905	986.2959	648.0435	0.8958	3.5859	1506	0.940157936	0.002171765	49.45718032	0.114246087
25.88183476	×ÔÉí³µÁ¾	Road 1	335.8273936	82.27665253	0.002048424	-0.446925133	0	0.090196081	363.6108	986.3057	648.0272	0.8919	3.5898	1507	0.93992952	0.002171237	49.47281644	0.114282206
25.89846835	×ÔÉí³µÁ¾	Road 1	336.2073743	82.23905869	0.002085563	-0.235157415	0	0.074509807	364.091	986.3213	648.0028	0.8849	3.5967	1508	0.939637123	0.002170562	49.48844598	0.11431831
25.91508947	×ÔÉí³µÁ¾	Road 1	336.5870055	82.22504425	0.00212769	-0.066680551	0	0.050980393	364.411	986.3311	647.9863	0.8809	3.6007	1509	0.939528122	0.00217031	49.50406199	0.114354383
25.93186711	×ÔÉí³µÁ¾	Road 1	336.9701843	82.21915283	0.002161184	0.09554068	0	0.035294119	364.7539	986.3418	647.9689	0.8764	3.6052	1510	0.9394823	0.002170204	49.51982428	0.114390794
25.9484644	×ÔÉí³µÁ¾	Road 1	337.3492579	82.22212601	0.00219967	0.230742738	0	0.019607844	365.2339	986.3574	647.9445	0.8694	3.6131	1511	1.066790362	0.002464286	49.53753012	0.114431695
25.96511558	×ÔÉí³µÁ¾	Road 1	337.7295877	82.22763977	0.002241746	0.24798122	0	0.011764706	365.5539	986.3672	647.9282	0.8655	3.617	1512	1.174846943	0.002713896	49.55709271	0.114476884
25.98184301	×ÔÉí³µÁ¾	Road 1	338.1116985	82.23616104	0.00228118	0.237214386	0	0.011764706	366.034	986.3818	647.9037	0.8595	3.623	1513	1.301631335	0.003006768	49.57886565	0.11452718
25.99847073	×ÔÉí³µÁ¾	Road 1	338.4915562	82.24144821	0.00231466	0.227544352	0	0.011764706	366.3769	986.3936	647.8864	0.854	3.6285	1514	1.165641125	0.002692631	49.5982476	0.114571952
26.01511274	×ÔÉí³µÁ¾	Road 1	338.8717624	82.24617233	0.002348465	0.232437983	0	0.011764706	366.697	986.4033	647.87	0.85	3.6324	1515	1.141450717	0.002636751	49.61724364	0.114615833
26.03180241	×ÔÉí³µÁ¾	Road 1	339.2530945	82.25421982	0.002377702	0.242445111	0	0.011764706	367.1772	986.418	647.8456	0.844	3.6383	1516	1.282493201	0.002962559	49.63864803	0.114665277
26.04866766	×ÔÉí³µÁ¾	Road 1	339.6384638	82.25965118	0.002402251	0.238451347	0	0.011764706	367.4973	986.4277	647.8293	0.84	3.6433	1517	1.168726845	0.002699759	49.6583589	0.114710809
26.06508498	×ÔÉí³µÁ¾	Road 1	340.0136228	82.26511002	0.002423663	0.231417343	0	0.011764706	367.8404	986.4385	647.8119	0.8355	3.6478	1518	1.176220342	0.002717069	49.67766928	0.114755416
26.08178308	×ÔÉí³µÁ¾	Road 1	340.3952208	82.27001953	0.00244022	0.231581479	0	0.011764706	368.1606	986.4492	647.7959	0.8305	3.6527	1519	1.148910163	0.002653982	49.69685389	0.114799732
26.09836901	×ÔÉí³µÁ¾	Road 1	340.7742799	82.27531357	0.002448526	0.236432359	0	0.011764706	368.5036	986.46	647.7782	0.826	3.6572	1520	1.166861513	0.00269545	49.71620738	0.114844439
26.1150869	×ÔÉí³µÁ¾	Road 1	341.1563916	82.28322372	0.002455185	0.238444924	0	0.011764706	368.8696	986.4707	647.7598	0.8219	3.6613	1521	1.27642012	0.00294853	49.73754643	0.114893732
26.13176997	×ÔÉí³µÁ¾	Road 1	341.5377378	82.28977432	0.002456852	0.232654616	0	0.011764706	369.3729	986.4863	647.7342	0.8153	3.6678	1522	1.219251622	0.002816471	49.75788729	0.11494072
26.14843105	×ÔÉí³µÁ¾	Road 1	341.918604	82.2947113	0.002456852	0.231656	0	0.011764706	369.6932	986.4961	647.7179	0.8114	3.6717	1523	1.1508019	0.002658352	49.77706089	0.114985011
26.16506317	×ÔÉí³µÁ¾	Road 1	342.2988431	82.30223694	0.002456852	0.235018954	0	0.011764706	370.1736	986.5117	647.6935	0.8044	3.6796	1524	1.261939124	0.002915079	49.79804961	0.115033495
26.18171984	×ÔÉí³µÁ¾	Road 1	342.6796673	82.30736618	0.002456852	0.235491529	0	0.011764706	370.494	986.5215	647.6771	0.8005	3.6835	1525	1.159198093	0.002677748	49.817358	0.115078097
26.19843151	×ÔÉí³µÁ¾	Road 1	343.0617726	82.31253662	0.002456852	0.23308447	0	0.011764706	370.8143	986.5313	647.6609	0.7966	3.6875	1526	1.160284929	0.002680258	49.83674829	0.115122889
26.21504053	×ÔÉí³µÁ¾	Road 1	343.4415673	82.32034378	0.002456852	0.231320709	0	0.011764706	371.3178	986.5469	647.6353	0.7911	3.694	1527	1.274655653	0.002944455	49.85791908	0.115171793
26.23186326	×ÔÉí³µÁ¾	Road 1	343.8262736	82.32569275	0.002456852	0.232993364	0	0.011764706	371.6611	986.5566	647.6178	0.7875	3.6975	1528	1.166518925	0.002694659	49.87754311	0.115217125
26.24846349	×ÔÉí³µÁ¾	Road 1	344.2059145	82.3306366	0.002461856	0.234064326	0	0.011764706	371.9815	986.5664	647.6015	0.7836	3.7024	1529	1.152240377	0.002661675	49.89667057	0.115261309
26.26506518	×ÔÉí³µÁ¾	Road 1	344.5856238	82.33817596	0.002468539	0.232780606	0	0.011764706	372.4622	986.5811	647.5771	0.7777	3.7083	1530	1.263537739	0.002918772	49.91764743	0.115309766
26.2818146	×ÔÉí³µÁ¾	Road 1	344.9687365	82.34350433	0.00247691	0.231905118	0	0.011764706	372.8056	986.5918	647.5596	0.7732	3.7128	1531	1.166821595	0.002695358	49.93719101	0.115354911
26.2984042	×ÔÉí³µÁ¾	Road 1	345.3482252	82.35072098	0.00248698	0.232698575	0	0.011764706	373.1261	986.6016	647.5433	0.7693	3.7168	1532	1.250074282	0.002887672	49.95792924	0.115402817
26.31512429	×ÔÉí³µÁ¾	Road 1	345.7307251	82.35596695	0.002505512	0.232264265	0	0.011764706	373.6069	986.6162	647.5188	0.7634	3.7227	1533	1.163842713	0.002688477	49.9773888	0.115447768
26.33179783	×ÔÉí³µÁ¾	Road 1	346.1121846	82.36130219	0.002519048	0.232238322	0	0.011764706	373.9503	986.627	647.5013	0.7589	3.7272	1534	1.168332436	0.002698848	49.99686904	0.115492767
26.34838633	×ÔÉí³µÁ¾	Road 1	346.4917215	82.3662735	0.002532632	0.232182428	0	0.011764706	374.2709	986.6367	647.4851	0.7549	3.7321	1535	1.153937646	0.002665596	50.01601113	0.115536986
26.36506243	×ÔÉí³µÁ¾	Road 1	346.8732973	82.3737236	0.00255139	0.231805906	0	0.011764706	374.7518	986.6514	647.4606	0.749	3.7381	1536	1.2587011	0.0029076	50.03700136	0.115585473
26.38190789	×ÔÉí³µÁ¾	Road 1	347.2587713	82.37868805	0.002573678	0.232131079	0	0.011764706	375.0724	986.6602	647.4443	0.7461	3.7411	1537	1.150521908	0.002657706	50.05638243	0.115630243
26.39840695	×ÔÉí³µÁ¾	Road 1	347.6363545	82.38648148	0.002599555	0.231715232	0	0.011764706	375.5763	986.6758	647.4186	0.7396	3.7476	1538	1.277076652	0.002950047	50.07745299	0.115678916
26.41510541	×ÔÉí³µÁ¾	Road 1	348.0185241	82.39144592	0.002637822	0.23206988	0	0.011764706	375.8969	986.6855	647.4023	0.7357	3.7516	1539	1.152500677	0.002662277	50.09669798	0.115723372
26.43182514	×ÔÉí³µÁ¾	Road 1	348.4012033	82.39638977	0.002657095	0.231244266	0	0.011764706	376.2176	986.6953	647.386	0.7318	3.7565	1540	1.151405409	0.002659746	50.11594917	0.115767843
26.44839897	×ÔÉí³µÁ¾	Road 1	348.7805678	82.40168381	0.002671171	0.231582671	0	0.011764706	376.5383	986.7041	647.3697	0.7288	3.7595	1541	1.168358862	0.002698909	50.13531336	0.115812574
26.46503732	×ÔÉí³µÁ¾	Road 1	349.1614416	82.40875626	0.002679993	0.231599346	0	0.011764706	377.0194	986.7188	647.3453	0.7229	3.7655	1542	1.243667358	0.002872872	50.15600593	0.115860374
26.48182376	×ÔÉí³µÁ¾	Road 1	349.5457283	82.4136795	0.002690606	0.231533065	0	0.011764706	377.3402	986.7285	647.3289	0.719	3.7694	1543	1.149873197	0.002656207	50.1753082	0.115904962
26.49842363	×ÔÉí³µÁ¾	Road 1	349.9257666	82.41863022	0.002699471	0.231157646	0	0.011764706	377.661	986.7383	647.3126	0.7151	3.7734	1544	1.153450533	0.002664471	50.19445532	0.115949192
26.51511403	×ÔÉí³µÁ¾	Road 1	350.3079152	82.4267189	0.0027048	0.231479049	0	0.011764706	378.188	986.7539	647.2858	0.709	3.7805	1545	1.28629673	0.002971345	50.21592413	0.115998785
26.53174138	×ÔÉí³µÁ¾	Road 1	350.6886447	82.43201981	0.002715478	0.231502697	0	0.011764706	378.5318	986.7637	647.2682	0.7055	3.784	1546	1.168240346	0.002698635	50.23534888	0.116043656
26.54838926	×ÔÉí³µÁ¾	Road 1	351.069867	82.43693619	0.002726184	0.230597615	0	0.011764706	378.8526	986.7734	647.252	0.7016	3.788	1547	1.151558163	0.002660099	50.25451988	0.116087941
26.56507563	×ÔÉí³µÁ¾	Road 1	351.4520055	82.44443436	0.002736918	0.231871173	0	0.011764706	379.334	986.7871	647.2274	0.6966	3.793	1548	1.261380424	0.002913789	50.27556774	0.116136561
26.58184081	×ÔÉí³µÁ¾	Road 1	351.8359723	82.44949493	0.002754871	0.231637657	0	0.011764706	379.6778	986.7979	647.21	0.6922	3.7975	1549	1.156343722	0.002671154	50.29495405	0.116181344
26.59840108	×ÔÉí³µÁ¾	Road 1	352.2152786	82.45654678	0.002780136	0.231382146	0	0.011764706	379.9987	986.8066	647.1936	0.6902	3.8015	1550	1.244756315	0.002875387	50.31556755	0.116228961
26.61508489	×ÔÉí³µÁ¾	Road 1	352.5974278	82.45943756	0.002812847	0.230542272	0	0.011764706	380.3196	986.8164	647.1773	0.6862	3.8054	1551	1.064822304	0.00245974	50.33333284	0.116269999
26.63179288	×ÔÉí³µÁ¾	Road 1	352.9801634	82.46637955	0.002855016	0.230712011	0	0.011764706	380.7782	986.8301	647.154	0.6809	3.8108	1552	1.237500158	0.002858625	50.35400899	0.116317761
26.64840227	×ÔÉí³µÁ¾	Road 1	353.3606644	82.47163239	0.002893885	0.231126532	0	0.011764706	381.1221	986.8398	647.1365	0.6774	3.8144	1553	1.166840915	0.002695403	50.37338951	0.11636253
26.6651044	×ÔÉí³µÁ¾	Road 1	353.7433263	82.47946701	0.002942494	0.23041071	0	0.011764706	381.6266	986.8545	647.1108	0.6719	3.8199	1554	1.275844074	0.0029472	50.39469882	0.116411754
26.68178344	×ÔÉí³µÁ¾	Road 1	354.1254818	82.48436279	0.003014514	0.231224567	0	0.011764706	381.9476	986.8633	647.0945	0.6689	3.8229	1555	1.150774522	0.002658289	50.41389263	0.116456092
26.6984009	×ÔÉí³µÁ¾	Road 1	354.5062603	82.49171677	0.00308964	0.230346009	0	0.011764706	382.4292	986.8779	647.0699	0.6631	3.8298	1556	1.257074742	0.002903843	50.43478202	0.116504346
26.71504768	×ÔÉí³µÁ¾	Road 1	354.887733	82.49653015	0.003177864	0.231403559	0	0.011764706	382.7503	986.8867	647.0536	0.6601	3.8328	1557	1.147776877	0.002651365	50.45388881	0.116548483
26.73178317	×ÔÉí³µÁ¾	Road 1	355.2712613	82.50144653	0.003302144	0.23052384	0	0.011764706	383.0714	986.8965	647.0373	0.6562	3.8367	1558	1.151122379	0.002659093	50.4731534	0.116592984
26.74843105	×ÔÉí³µÁ¾	Road 1	355.6528159	82.50880737	0.003456763	0.231329292	0	0.011764706	383.5531	986.9102	647.0128	0.6512	3.8416	1559	1.256990451	0.002903648	50.49407963	0.116641324
26.76515334	×ÔÉí³µÁ¾	Road 1	356.0361004	82.51405334	0.003637746	0.230441734	0	0.011764706	383.8972	986.9199	646.9952	0.6477	3.8461	1560	1.165471491	0.002692239	50.51356898	0.116686344
26.78184337	×ÔÉí³µÁ¾	Road 1	356.4186714	82.51964951	0.003858626	0.230819553	0	0.011764706	384.2643	986.9297	646.9766	0.6446	3.8492	1561	1.180924477	0.002727936	50.53327865	0.116731874
26.79834573	×ÔÉí³µÁ¾	Road 1	356.796963	82.52455215	0.004076577	0.230738387	0	0.011764706	384.5855	986.9395	646.9602	0.6407	3.8532	1562	1.153726957	0.002665109	50.55231787	0.116775854
26.81504273	×ÔÉí³µÁ¾	Road 1	357.1797505	82.53188553	0.00432199	0.230723307	0	0.011764706	385.0673	986.9531	646.9357	0.6358	3.8581	1563	1.255157325	0.002899413	50.57327523	0.116824266
26.83180571	×ÔÉí³µÁ¾	Road 1	357.5640729	82.53668518	0.004625181	0.230844617	0	0.011764706	385.3886	986.9619	646.9193	0.6328	3.861	1564	1.146175614	0.002647666	50.59248855	0.116868649
26.84836708	×ÔÉí³µÁ¾	Road 1	357.9438074	82.54412155	0.004884018	0.23055011	0	0.011764706	385.8705	986.9756	646.8948	0.6279	3.8669	1565	1.262300512	0.002915914	50.61339398	0.11691694
26.86504502	×ÔÉí³µÁ¾	Road 1	358.3262372	82.54901047	0.005114195	0.230065927	0	0.011764706	386.1918	986.9844	646.8784	0.625	3.8699	1566	1.151161444	0.002659183	50.63259298	0.11696129
26.8818146	×ÔÉí³µÁ¾	Road 1	358.7107911	82.55389938	0.005351493	0.23045899	0	0.011764706	386.5131	986.9932	646.8621	0.622	3.8728	1567	1.150069064	0.00265666	50.65187915	0.117005841
26.89843389	×ÔÉí³µÁ¾	Road 1	359.0919323	82.56120529	0.005547105	0.230363429	0	0.011764706	386.9951	987.0068	646.8375	0.6171	3.8787	1568	1.255782815	0.002900858	50.67274937	0.117054051
26.91503338	×ÔÉí³µÁ¾	Road 1	359.4726422	82.56609421	0.005735684	0.230352953	0	0.011764706	387.3165	987.0156	646.8212	0.6151	3.8817	1569	1.152325993	0.002661873	50.6918774	0.117098237
26.93176521	×ÔÉí³µÁ¾	Road 1	359.8564107	82.57120285	0.00593749	0.229613811	0	0.011764706	387.6609	987.0254	646.8037	0.6116	3.8852	1570	1.160086978	0.002679801	50.71128777	0.117143075
26.96792157	×ÔÉí³µÁ¾	Road 1	360.6858358	82.58380966	0.006098023	0.229724914	0	0.011764706	388.4874	987.0479	646.7616	0.6042	3.8936	1571	1.191144244	0.002751543	50.75435521	0.117242561
26.98350461	×ÔÉí³µÁ¾	Road 1	361.0433414	82.59111557	0.006221077	0.230156556	0	0.011764706	388.9696	987.0605	646.7371	0.6003	3.8976	1572	1.27699335	0.002949855	50.77425464	0.117288528
26.99841648	×ÔÉí³µÁ¾	Road 1	361.3854621	82.59422607	0.00629882	0.229629874	0	0.011764706	389.1763	987.0664	646.7265	0.5981	3.8997	1573	1.091285304	0.002520869	50.79052775	0.117326119
27.0150332	×ÔÉí³µÁ¾	Road 1	361.7667318	82.60178604	0.00629882	0.230497479	0	0.011764706	389.6815	987.0801	646.7007	0.5936	3.9051	1574	1.267214271	0.002927265	50.8115847	0.117374761
27.03176429	×ÔÉí³µÁ¾	Road 1	362.1506482	82.60662689	0.00629882	0.229865164	0	0.011764706	390.0031	987.0889	646.6844	0.5907	3.9081	1575	1.149040032	0.002654282	50.83080939	0.11741917
27.04840814	×ÔÉí³µÁ¾	Road 1	362.5325873	82.61195526	0.00629882	0.230460018	0	0.011764706	390.3476	987.0977	646.6669	0.5881	3.9116	1576	1.171088082	0.002705213	50.8503008	0.117464195
27.06507105	×ÔÉí³µÁ¾	Road 1	362.9149863	82.61680298	0.00629882	0.229589418	0	0.011764706	390.6692	987.1064	646.6505	0.5852	3.9145	1577	1.150284038	0.002657156	50.86946788	0.117508471
27.08176841	×ÔÉí³µÁ¾	Road 1	363.2982014	82.62227554	0.006273872	0.23028174	0	0.011764706	391.0367	987.1162	646.6318	0.5821	3.9176	1578	1.176630025	0.002718015	50.8891145	0.117553855
27.09845552	×ÔÉí³µÁ¾	Road 1	363.6812211	82.63093414	0.00624899	0.230656028	0	0.011764706	391.6111	987.1309	646.6025	0.5788	3.9228	1579	1.313194821	0.00303348	50.91102792	0.117604474
27.11512686	×ÔÉí³µÁ¾	Road 1	364.063902	82.63590546	0.006211791	0.229554638	0	0.011764706	391.9327	987.1387	646.5861	0.5769	3.9248	1580	1.155669658	0.002669597	50.93029448	0.11764898
27.13177437	×ÔÉí³µÁ¾	Road 1	364.4460584	82.64074631	0.006162422	0.230385318	0	0.011764706	392.2544	987.1475	646.5698	0.5739	3.9287	1581	1.15042805	0.002657489	50.94944625	0.117693221
27.1483724	×ÔÉí³µÁ¾	Road 1	364.8271136	82.64830627	0.006104136	0.229783848	0	0.011764706	392.7599	987.1602	646.5439	0.5704	3.9322	1582	1.26812498	0.002929369	50.97049462	0.117741843
27.16506537	×ÔÉí³µÁ¾	Road 1	365.210371	82.65316086	0.006037109	0.230617628	0	0.011764706	393.0817	987.1689	646.5276	0.5674	3.9362	1583	1.15057786	0.002657835	50.98970118	0.11778621
27.18174734	×ÔÉí³µÁ¾	Road 1	365.5933985	82.65803604	0.005958529	0.229744956	0	0.011764706	393.4034	987.1768	646.5112	0.5654	3.9382	1584	1.151646988	0.002660305	51.00891292	0.117830589
27.19836259	×ÔÉí³µÁ¾	Road 1	365.974929	82.66558228	0.005883618	0.230383322	0	0.011764706	393.9091	987.1895	646.4855	0.5619	3.9427	1585	1.267399566	0.002927693	51.02997109	0.117879233
27.21511604	×ÔÉí³µÁ¾	Road 1	366.3596558	82.67053299	0.00582118	0.229735941	0	0.011764706	394.2309	987.1973	646.4691	0.5599	3.9447	1586	1.154105743	0.002665984	51.04930634	0.117923898
27.2318321	×ÔÉí³µÁ¾	Road 1	366.7435458	82.67520905	0.005750364	0.23107402	0	0.011764706	394.5527	987.2061	646.4526	0.557	3.9486	1587	1.14288753	0.00264007	51.06841092	0.117968029
27.24836342	×ÔÉí³µÁ¾	Road 1	367.123219	82.68088074	0.005694711	0.229751691	0	0.011764706	394.8746	987.2139	646.4363	0.555	3.9506	1588	1.188210269	0.002744766	51.0880536	0.118013404
27.26502486	×ÔÉí³µÁ¾	Road 1	367.5059119	82.68757553	0.005645222	0.230548874	0	0.011764706	395.3574	987.2256	646.4116	0.553	3.9536	1589	1.230243494	0.002841862	51.10855123	0.118060753
27.2818091	×ÔÉí³µÁ¾	Road 1	367.8914475	82.69234085	0.005604682	0.229917929	0	0.011764706	395.6793	987.2334	646.3953	0.5511	3.9565	1590	1.146050565	0.002647377	51.12778682	0.118105188
27.29837084	×ÔÉí³µÁ¾	Road 1	368.2719069	82.69988708	0.005572965	0.230997831	0	0.011764706	396.1851	987.2461	646.3695	0.5475	3.9601	1591	1.268849865	0.002931043	51.14880118	0.118153731
27.33305658	×ÔÉí³µÁ¾	Road 1	369.0688215	82.71100388	0.005558589	0.230954036	0	0.011764706	396.921	987.2637	646.332	0.5433	3.9653	1592	1.172381685	0.002708202	51.18946611	0.118247667
27.34838633	×ÔÉí³µÁ¾	Road 1	369.4210478	82.71596146	0.005547105	0.229861304	0	0.011764706	397.243	987.2715	646.3156	0.5413	3.9683	1593	1.174512488	0.002713124	51.20747109	0.118289258
27.36509322	×ÔÉí³µÁ¾	Road 1	369.8049498	82.7231575	0.005547105	0.23092258	0	0.011764706	397.726	987.2832	646.291	0.5384	3.9712	1594	1.251309168	0.002890524	51.22837658	0.11833755
27.38169089	×ÔÉí³µÁ¾	Road 1	370.1863535	82.72569809	0.005547105	0.229823098	0	0.011764706	397.8871	987.2871	646.2828	0.5374	3.9722	1595	1.052851535	0.002432087	51.24585145	0.118377917
27.3984381	×ÔÉí³µÁ¾	Road 1	370.5712271	82.7328598	0.005547105	0.23047927	0	0.011764706	398.3701	987.2979	646.2581	0.5354	3.9752	1596	1.249213739	0.002885684	51.26677231	0.118426244
27.41510065	×ÔÉí³µÁ¾	Road 1	370.9541795	82.73818817	0.005547105	0.22976844	0	0.011764706	398.7152	987.3066	646.2406	0.5339	3.9778	1597	1.172162324	0.002707695	51.28630351	0.118471361
27.43175586	×ÔÉí³µÁ¾	Road 1	371.336989	82.7437088	0.005538502	0.229752004	0	0.011764706	399.0833	987.3145	646.2218	0.5327	3.9799	1598	1.180575082	0.002727128	51.30596624	0.118516782
27.44833813	×ÔÉí³µÁ¾	Road 1	371.7181502	82.74987488	0.005532772	0.229958862	0	0.011764706	399.4975	987.3242	646.2007	0.5304	3.9822	1599	1.209516788	0.002793984	51.32602277	0.118563113
27.46501936	×ÔÉí³µÁ¾	Road 1	372.1016104	82.75505219	0.005532772	0.229940563	0	0.011764706	399.8427	987.332	646.1831	0.5287	3.9847	1600	1.165607802	0.002692554	51.34546655	0.118608028
27.48171526	×ÔÉí³µÁ¾	Road 1	372.4854346	82.76087494	0.005532772	0.230558544	0	0.011764706	400.2339	987.3418	646.1631	0.526	3.9874	1601	1.193121526	0.002756111	51.36538679	0.118654043
27.49834078	×ÔÉí³µÁ¾	Road 1	372.8676794	82.76919708	0.005532772	0.230972409	0	0.011764706	400.7862	987.3535	646.1349	0.5242	3.9901	1602	1.301790798	0.003007137	51.38702974	0.118704039
27.51500846	×ÔÉí³µÁ¾	Road 1	373.2509158	82.7740654	0.005547105	0.230102837	0	0.011764706	401.1084	987.3613	646.1185	0.5222	3.9921	1603	1.1527271	0.0026628	51.40624302	0.118748421
27.53180589	×ÔÉí³µÁ¾	Road 1	373.6371589	82.77901611	0.005604682	0.230217591	0	0.011764706	401.4307	987.3682	646.1021	0.5212	3.9931	1604	1.154672981	0.002667295	51.42563856	0.118793225
27.54833721	×ÔÉí³µÁ¾	Road 1	374.0173079	82.78447495	0.005680126	0.230025023	0	0.011764706	401.799	987.377	646.0833	0.5191	3.9962	1605	1.180111882	0.002726058	51.44514737	0.11883829
27.5650793	×ÔÉí³µÁ¾	Road 1	374.4023387	82.79200745	0.00578275	0.230607644	0	0.011764706	402.3054	987.3877	646.0575	0.5175	3.9977	1606	1.265830686	0.002924069	51.46634001	0.118887245
27.58173744	×ÔÉí³µÁ¾	Road 1	374.7854635	82.79730148	0.005925491	0.229938731	0	0.011764706	402.6508	987.3955	646.0399	0.517	3.9999	1607	1.171371263	0.002705868	51.48585288	0.11893232
27.59837836	×ÔÉí³µÁ¾	Road 1	375.168221	82.80355682	0.006037109	0.230742529	0	0.011764706	402.9731	987.4023	646.0234	0.516	4.0008	1608	1.213007261	0.002802047	51.50603844	0.118978949
27.61504713	×ÔÉí³µÁ¾	Road 1	375.5516353	82.80700378	0.00615012	0.229384854	0	0.011764706	403.2955	987.4102	646.0071	0.514	4.0026	1609	1.0920347	0.0025226	51.52424132	0.119020997
27.6317412	×ÔÉí³µÁ¾	Road 1	375.9356698	82.81531219	0.006255204	0.229797527	0	0.011764706	403.8481	987.4219	645.9788	0.5123	4.0051	1610	1.300289382	0.003003668	51.54594843	0.119071141
27.64838321	×ÔÉí³µÁ¾	Road 1	376.3185288	82.82003632	0.006342638	0.229540244	0	0.011764706	404.1705	987.4287	645.9624	0.5113	4.006	1611	1.147321891	0.002650314	51.56504218	0.119115247
27.66509084	×ÔÉí³µÁ¾	Road 1	376.702931	82.82731476	0.006411904	0.22996515	0	0.011764706	404.6542	987.4395	645.9377	0.5093	4.009	1612	1.256023237	0.002901414	51.58602735	0.119163723
27.68175558	×ÔÉí³µÁ¾	Road 1	377.086369	82.83215561	0.006465772	0.229858488	0	0.011764706	404.9767	987.4463	645.9213	0.5083	4.01	1613	1.152182608	0.002661542	51.60522818	0.119208077
27.69837891	×ÔÉí³µÁ¾	Road 1	377.4688762	82.83700333	0.006497599	0.229885519	0	0.011764706	405.2991	987.4531	645.9048	0.5073	4.012	1614	1.153046307	0.002663537	51.62439564	0.119252354
27.71504328	×ÔÉí³µÁ¾	Road 1	377.8523505	82.84183731	0.006513552	0.230270028	0	0.011764706	405.6216	987.46	645.8884	0.5063	4.013	1615	1.151991817	0.002661101	51.64359286	0.1192967
27.73172305	×ÔÉí³µÁ¾	Road 1	378.2362068	82.84781799	0.006519941	0.229603395	0	0.011764706	406.0133	987.4678	645.8684	0.5056	4.0137	1616	1.201079723	0.002774494	51.6636266	0.119342977
27.74834088	×ÔÉí³µÁ¾	Road 1	378.6186625	82.85324249	0.006519941	0.230223328	0	0.011764706	406.3819	987.4756	645.8496	0.5054	4.0158	1617	1.178133021	0.002721487	51.6832046	0.119388203
27.76498362	×ÔÉí³µÁ¾	Road 1	379.0017286	82.86118698	0.006519941	0.229348615	0	0.011764706	406.9118	987.4863	645.8226	0.5043	4.0179	1618	1.286285481	0.002971319	51.70461193	0.119437654
27.78176273	×ÔÉí³µÁ¾	Road 1	379.3879583	82.86656342	0.006519941	0.229707971	0	0.011764706	407.2575	987.4932	645.8049	0.5037	4.0185	1619	1.173976	0.002711885	51.7243102	0.119483157
27.79834573	×ÔÉí³µÁ¾	Road 1	379.7696954	82.87121887	0.006519941	0.229754269	0	0.011764706	407.5801	987.5	645.7885	0.5027	4.0195	1620	1.145603759	0.002646345	51.74330775	0.119527041
27.81500754	×ÔÉí³µÁ¾	Road 1	380.1532801	82.87845612	0.006519941	0.230132207	0	0.011764706	408.0641	987.5098	645.7638	0.5017	4.0215	1621	1.255700702	0.002900669	51.76422999	0.119575371
27.83172947	×ÔÉí³µÁ¾	Road 1	380.5382729	82.88364716	0.006519941	0.229709938	0	0.011764706	408.4098	987.5166	645.7462	0.5012	4.0221	1622	1.167000204	0.00269577	51.78374448	0.11962045
27.84840191	×ÔÉí³µÁ¾	Road 1	380.9221484	82.88837814	0.006519941	0.229888454	0	0.011764706	408.7325	987.5225	645.7297	0.5012	4.0231	1623	1.147945041	0.002651753	51.80288353	0.119664661
27.86498967	×ÔÉí³µÁ¾	Road 1	381.3041082	82.89575272	0.006519941	0.230108157	0	0.011764706	409.2166	987.5322	645.705	0.5002	4.0241	1624	1.263219461	0.002918037	51.82383752	0.119713065
27.88179737	×ÔÉí³µÁ¾	Road 1	381.691156	82.90083389	0.006519941	0.229838148	0	0.011764706	409.5624	987.5391	645.6874	0.4997	4.0256	1625	1.161362418	0.002682747	51.84335735	0.119758155
27.89836571	×ÔÉí³µÁ¾	Road 1	382.0727141	82.90566788	0.006519941	0.229863793	0	0.011764706	409.8851	987.5449	645.6709	0.5007	4.0257	1626	1.153852948	0.0026654	51.86247477	0.119802317
27.91501542	×ÔÉí³µÁ¾	Road 1	382.4561798	82.91293259	0.006507168	0.230234504	0	0.011764706	410.3693	987.5537	645.6461	0.5007	4.0267	1627	1.257506282	0.00290484	51.88341189	0.119850681
27.93167503	×ÔÉí³µÁ¾	Road 1	382.8398979	82.91821289	0.00648804	0.229975164	0	0.011764706	410.7152	987.5605	645.6285	0.5001	4.0273	1628	1.172033068	0.002707396	51.90293751	0.119895786
27.94838633	×ÔÉí³µÁ¾	Road 1	383.22483	82.92328033	0.006459419	0.229795173	0	0.011764706	411.0611	987.5674	645.6108	0.4996	4.0288	1629	1.162256516	0.002684813	51.92236032	0.119940652
27.96505364	×ÔÉí³µÁ¾	Road 1	383.6087825	82.93054504	0.006434049	0.229346246	0	0.011764706	411.5453	987.5762	645.5861	0.4996	4.0288	1630	1.257379587	0.002904547	51.94331745	0.119989063
27.9817532	×ÔÉí³µÁ¾	Road 1	383.9935004	82.9353653	0.006392963	0.229790613	0	0.011764706	411.8682	987.582	645.5696	0.4996	4.0298	1631	1.151926262	0.00266095	51.96255412	0.1200335
27.99837322	×ÔÉí³µÁ¾	Road 1	384.3764146	82.94194336	0.006348914	0.230619371	0	0.011764706	412.1911	987.5879	645.5532	0.4996	4.0298	1632	1.228786412	0.002838497	51.98297658	0.120080676
28.01504346	×ÔÉí³µÁ¾	Road 1	384.7605129	82.94745026	0.00629882	0.230150968	0	0.011764706	412.6755	987.5967	645.5284	0.4996	4.0307	1633	1.181938673	0.002730278	52.00267978	0.12012619
28.03180461	×ÔÉí³µÁ¾	Road 1	385.1467279	82.95219498	0.006233472	0.229992673	0	0.011764706	412.9985	987.6025	645.512	0.5006	4.0307	1634	1.148108662	0.002652131	52.02192339	0.120170643
28.0483253	×ÔÉí³µÁ¾	Road 1	385.5274243	82.95702896	0.006168578	0.229970157	0	0.011764706	413.3214	987.6084	645.4955	0.5006	4.0317	1635	1.154985228	0.002668016	52.04100454	0.12021472
28.06502926	×ÔÉí³µÁ¾	Road 1	385.9123794	82.96464386	0.006104136	0.229989961	0	0.011764706	413.829	987.6172	645.4695	0.501	4.0313	1636	1.272117201	0.002938591	52.06225394	0.120263807
28.08176548	×ÔÉí³µÁ¾	Road 1	386.2981003	82.96947098	0.006021944	0.230365187	0	0.011764706	414.152	987.623	645.4531	0.5011	4.0322	1637	1.152117483	0.002661391	52.08153603	0.120308348
28.09838624	×ÔÉí³µÁ¾	Road 1	386.6811826	82.97432556	0.005952513	0.229952767	0	0.011764706	414.4751	987.6289	645.4366	0.5011	4.0322	1638	1.154788947	0.002667562	52.1007295	0.120352685
28.11501359	×ÔÉí³µÁ¾	Road 1	387.0644515	82.98182373	0.005883618	0.230133981	0	0.011764706	414.9828	987.6377	645.4106	0.5012	4.0324	1639	1.268790692	0.002930906	52.12182613	0.120401418
28.13177107	×ÔÉí³µÁ¾	Road 1	387.450743	82.98677444	0.005812296	0.229940161	0	0.011764706	415.3058	987.6426	645.3941	0.5021	4.0314	1640	1.157322006	0.002673414	52.14121993	0.120446218
28.14839109	×ÔÉí³µÁ¾	Road 1	387.8338876	82.9915123	0.005750364	0.230136633	0	0.011764706	415.629	987.6484	645.3776	0.5022	4.0314	1641	1.149938249	0.002656357	52.16033193	0.120490367
28.16499975	×ÔÉí³µÁ¾	Road 1	388.2168054	82.99912033	0.005685957	0.230603546	0	0.011764706	416.1367	987.6572	645.3517	0.5016	4.031	1642	1.274100911	0.002943173	52.18149304	0.120539249
28.18167769	×ÔÉí³µÁ¾	Road 1	388.6013429	83.00396118	0.005613353	0.229697898	0	0.011764706	416.3214	987.6602	645.3423	0.5011	4.0306	1643	1.153785304	0.002665244	52.2007358	0.1205837
28.19839558	×ÔÉí³µÁ¾	Road 1	388.9868289	83.00983887	0.005561462	0.230143681	0	0.011764706	416.8062	987.668	645.3175	0.5021	4.0286	1644	1.197836112	0.002767001	52.2207611	0.120629958
28.21504896	×ÔÉí³µÁ¾	Road 1	389.3708582	83.0165062	0.005512748	0.230286434	0	0.011764706	417.291	987.6758	645.2928	0.5021	4.0276	1645	1.232900499	0.002848	52.24129305	0.120677387
28.23175916	×ÔÉí³µÁ¾	Road 1	389.7562216	83.0216835	0.005455804	0.229870215	0	0.011764706	417.6373	987.6816	645.275	0.5025	4.0272	1646	1.168010875	0.002698105	52.26081074	0.120722473
28.24833446	×ÔÉí³µÁ¾	Road 1	390.1384966	83.02652435	0.005410532	0.230269179	0	0.011764706	417.9605	987.6875	645.2585	0.5025	4.0272	1647	1.155306929	0.002668759	52.27996031	0.120766708
28.26502266	×ÔÉí³µÁ¾	Road 1	390.52341	83.03400879	0.005371124	0.229633108	0	0.011764706	418.4685	987.6953	645.2326	0.503	4.0259	1648	1.267629665	0.002928225	52.30111477	0.120815575
28.28178161	×ÔÉí³µÁ¾	Road 1	390.9099777	83.03885651	0.005331909	0.230060831	0	0.011764706	418.7918	987.7002	645.2161	0.504	4.0249	1649	1.153431439	0.002664427	52.32044506	0.120860228
28.29832429	×ÔÉí³µÁ¾	Road 1	391.2915822	83.04470673	0.005304016	0.230041161	0	0.011764706	419.1152	987.7051	645.1996	0.504	4.024	1650	1.199691485	0.002771287	52.34029117	0.120906073
28.31500479	×ÔÉí³µÁ¾	Road 1	391.6763965	83.0509346	0.005273445	0.230412096	0	0.011764706	419.6002	987.7129	645.1748	0.505	4.023	1651	1.213912941	0.002804139	52.36053985	0.120952847
28.33179087	×ÔÉí³µÁ¾	Road 1	392.0636698	83.05599518	0.005237468	0.230010107	0	0.011764706	419.9467	987.7188	645.1571	0.5044	4.0226	1652	1.162373386	0.002685083	52.38005154	0.120997919
28.348357	×ÔÉí³µÁ¾	Road 1	392.4458966	83.06198959	0.005207154	0.230004102	0	0.011764706	420.27	987.7236	645.1406	0.5054	4.0207	1653	1.20576955	0.002785328	52.40002648	0.121044061
28.36501698	×ÔÉí³µÁ¾	Road 1	392.8303172	83.06818314	0.005174217	0.23082751	0	0.011764706	420.7552	987.7305	645.1158	0.5074	4.0188	1654	1.212953724	0.002801923	52.42023426	0.121090741
28.38172681	×ÔÉí³µÁ¾	Road 1	393.2159117	83.07327118	0.005133243	0.229748562	0	0.011764706	421.1017	987.7363	645.0981	0.5069	4.0184	1655	1.164720243	0.002690504	52.43969654	0.121135699
28.3983373	×ÔÉí³µÁ¾	Road 1	393.5992392	83.07877121	0.005092485	0.230626971	0	0.011764706	421.4251	987.7412	645.0815	0.5079	4.0174	1656	1.183891282	0.002734789	52.45936156	0.121181125
28.41498958	×ÔÉí³µÁ¾	Road 1	393.9835616	83.08534927	0.005038477	0.229729101	0	0.011764706	421.9104	987.748	645.0568	0.5089	4.0155	1657	1.229844497	0.002840941	52.47984127	0.121228433
28.43167118	×ÔÉí³µÁ¾	Road 1	394.3685852	83.09062271	0.004974174	0.22991696	0	0.011764706	422.257	987.7529	645.0391	0.5103	4.0141	1658	1.173250675	0.002710209	52.49941297	0.121273644
28.44836708	×ÔÉí³µÁ¾	Road 1	394.7539654	83.0963768	0.004907776	0.23050496	0	0.011764706	422.5805	987.7578	645.0225	0.5113	4.0131	1659	1.193788996	0.002757653	52.51934435	0.121319685
28.46501863	×ÔÉí³µÁ¾	Road 1	395.1383506	83.10259781	0.004826266	0.229693279	0	0.011764706	423.0658	987.7646	644.9977	0.5123	4.0112	1660	1.214651627	0.002805845	52.53957018	0.121366407
28.48178381	×ÔÉí³µÁ¾	Road 1	395.5253834	83.10786438	0.004730168	0.230279133	0	0.011764706	423.4125	987.7695	644.98	0.5137	4.0098	1661	1.172005955	0.002707334	52.55921907	0.121411796
28.49829863	×ÔÉí³µÁ¾	Road 1	395.9066584	83.1126091	0.004632809	0.229685575	0	0.011764706	423.7361	987.7744	644.9634	0.5137	4.0089	1662	1.152781325	0.002662925	52.57825705	0.121455774
28.51499416	×ÔÉí³µÁ¾	Road 1	396.2921389	83.11983948	0.004531779	0.230571359	0	0.011764706	424.2216	987.7813	644.9386	0.5157	4.006	1663	1.257558618	0.00290496	52.59925266	0.121504274
28.53175714	×ÔÉí³µÁ¾	Road 1	396.6792021	83.12527771	0.004419889	0.229897693	0	0.011764706	424.5914	987.7861	644.9197	0.5176	4.0042	1664	1.179574235	0.002724816	52.61902584	0.12154995
28.54839183	×ÔÉí³µÁ¾	Road 1	397.0633256	83.13020782	0.004314706	0.23052004	0	0.011764706	424.9151	987.791	644.9032	0.5176	4.0032	1665	1.159480933	0.002678401	52.63831344	0.121594504
28.56504557	×ÔÉí³µÁ¾	Road 1	397.4479228	83.13745193	0.004206432	0.229645163	0	0.011764706	425.4006	987.7979	644.8784	0.5196	4.0013	1666	1.259134632	0.002908601	52.65928275	0.121642943
28.58186097	×ÔÉí³µÁ¾	Road 1	397.8362753	83.14218292	0.00408593	0.23118031	0	0.011764706	425.7243	987.8027	644.8619	0.5196	4.0003	1667	1.148808177	0.002653747	52.67860041	0.121687567
28.59838459	×ÔÉí³µÁ¾	Road 1	398.2179165	83.14815674	0.003979235	0.229652181	0	0.011764706	426.0481	987.8066	644.8453	0.5216	3.9983	1668	1.206482514	0.002786975	52.69853587	0.121733618
28.61501304	×ÔÉí³µÁ¾	Road 1	398.6019965	83.15194016	0.003867642	0.230531514	0	0.011764706	426.3718	987.8115	644.8287	0.5226	3.9974	1669	1.110233586	0.00256464	52.71699733	0.121776264
28.63165872	×ÔÉí³µÁ¾	Road 1	398.9865128	83.1602211	0.003740479	0.230072364	0	0.011764706	426.9269	987.8184	644.8004	0.5248	3.9942	1670	1.304309377	0.003012955	52.73870845	0.121826417
28.64832126	×ÔÉí³µÁ¾	Road 1	399.3714405	83.16495209	0.003624769	0.230706066	0	0.011764706	427.2507	987.8232	644.7838	0.5258	3.9932	1671	1.150895533	0.002658569	52.7578853	0.121870715
28.6649959	×ÔÉí³µÁ¾	Road 1	399.7566716	83.17012939	0.003515702	0.230286211	0	0.011764706	427.5976	987.8271	644.7661	0.5282	3.9908	1672	1.170037762	0.002702787	52.77739526	0.121915783
28.68179151	×ÔÉí³µÁ¾	Road 1	400.144731	83.17736664	0.00338402	0.230677739	0	0.011764706	428.0834	987.834	644.7413	0.5293	3.9888	1673	1.256660524	0.002902886	52.79850163	0.121964539
28.69838807	×ÔÉí³µÁ¾	Road 1	400.528214	83.18220749	0.00326372	0.230677798	0	0.011764706	428.4073	987.8379	644.7247	0.5312	3.9859	1674	1.156641796	0.002671843	52.81769791	0.122008882
28.71498573	×ÔÉí³µÁ¾	Road 1	400.9117556	83.18942413	0.003152207	0.230216175	0	0.011764706	428.8931	987.8447	644.6999	0.5332	3.9839	1675	1.259601286	0.002909679	52.83860434	0.122057176
28.73179013	×ÔÉí³µÁ¾	Road 1	401.3000972	83.19425812	0.003018336	0.230649903	0	0.011764706	429.217	987.8486	644.6833	0.5342	3.9819	1676	1.153878571	0.002665459	52.85799458	0.122101967
28.74831375	×ÔÉí³µÁ¾	Road 1	401.6819726	83.19918823	0.002903191	0.229967386	0	0.011764706	429.541	987.8525	644.6667	0.5362	3.9799	1677	1.161626443	0.002683357	52.87718885	0.122146306
28.7649686	×ÔÉí³µÁ¾	Road 1	402.0669027	83.20389862	0.002800096	0.230232075	0	0.011764706	429.8649	987.8574	644.6502	0.5372	3.9789	1678	1.150499078	0.002657653	52.89635024	0.122190569
28.78166449	×ÔÉí³µÁ¾	Road 1	402.4528172	83.21158905	0.002683528	0.229525819	0	0.011764706	430.3741	987.8633	644.6241	0.5396	3.9756	1679	1.278422009	0.002953155	52.91769464	0.122239875
28.79834537	×ÔÉí³µÁ¾	Road 1	402.8384062	83.2163063	0.002587458	0.230210587	0	0.011764706	430.6981	987.8672	644.6075	0.5416	3.9736	1680	1.150604595	0.002657897	52.93688773	0.122284211
28.8150211	×ÔÉí³µÁ¾	Road 1	403.2239101	83.22354355	0.002500449	0.230190709	0	0.011764706	431.1841	987.874	644.5828	0.5436	3.9716	1681	1.25941915	0.002909258	52.95788947	0.122332725
28.83175219	×ÔÉí³µÁ¾	Road 1	403.6107049	83.22596741	0.002394049	0.230187938	0	0.011764706	431.3461	987.876	644.5745	0.5446	3.9706	1682	1.0515085	0.002428985	52.97548236	0.122373364
28.848311	×ÔÉí³µÁ¾	Road 1	403.9935468	83.23250427	0.002309857	0.230118811	0	0.011764706	431.7859	987.8809	644.5519	0.5477	3.9675	1683	1.231305768	0.002844316	52.99587131	0.122420463
28.86498417	×ÔÉí³µÁ¾	Road 1	404.37907	83.24051743	0.0022261	0.229860678	0	0.011764706	432.3184	987.8877	644.5247	0.5496	3.9647	1684	1.293136348	0.002987145	53.017432	0.122470268
28.88166541	×ÔÉí³µÁ¾	Road 1	404.7648047	83.24592133	0.002147439	0.230123132	0	0.011764706	432.6888	987.8926	644.5058	0.5514	3.9628	1685	1.180513897	0.002726987	53.03712443	0.122515757
28.89834665	×ÔÉí³µÁ¾	Road 1	405.1505618	83.25074844	0.002093045	0.230522782	0	0.011764706	433.0129	987.8965	644.4892	0.5534	3.9608	1686	1.155690241	0.002669644	53.05640277	0.12256029
28.91500296	×ÔÉí³µÁ¾	Road 1	405.5357759	83.25797195	0.002043997	0.230089203	0	0.011764706	433.4992	987.9023	644.4644	0.5564	3.9579	1687	1.259587081	0.002909646	53.07738285	0.122608754
28.93174541	×ÔÉí³µÁ¾	Road 1	405.9229934	83.26038208	0.002002986	0.230490297	0	0.011764706	433.6613	987.9043	644.4561	0.5564	3.9569	1688	1.051158331	0.002428176	53.09498181	0.122649408
28.9483537	×ÔÉí³µÁ¾	Road 1	406.3071398	83.26726227	0.001955361	0.229604989	0	0.011764706	434.1245	987.9102	644.4324	0.5589	3.9543	1689	1.245722391	0.002877619	53.11567114	0.1226972
28.96496786	×ÔÉí³µÁ¾	Road 1	406.6914485	83.27303009	0.001891643	0.230277851	0	0.011764706	434.5182	987.915	644.4122	0.5612	3.9511	1690	1.197504122	0.002766235	53.13556666	0.122743159
28.98172608	×ÔÉí³µÁ¾	Road 1	407.0791266	83.28102264	0.001817027	0.229968861	0	0.011764706	435.0508	987.9209	644.385	0.565	3.9473	1691	1.290979838	0.002982163	53.15720118	0.122793135
28.99835086	×ÔÉí³µÁ¾	Road 1	407.4637398	83.2857399	0.001749712	0.230235413	0	0.011764706	435.3751	987.9248	644.3684	0.567	3.9453	1692	1.152000945	0.002661122	53.17635295	0.122837375
29.01494413	×ÔÉí³µÁ¾	Road 1	407.847646	83.29056015	0.001667289	0.230629757	0	0.011764706	435.6994	987.9287	644.3519	0.569	3.9433	1693	1.156905878	0.002672453	53.19554979	0.12288172
29.03166312	×ÔÉí³µÁ¾	Road 1	408.2344962	83.29811325	0.001559012	0.230199337	0	0.011764706	436.2091	987.9346	644.3257	0.5714	3.9399	1694	1.273069064	0.00294079	53.21683422	0.122930887
29.048322	×ÔÉí³µÁ¾	Road 1	408.6199777	83.3029335	0.00145788	0.230589077	0	0.011764706	436.5334	987.9385	644.3092	0.5734	3.9379	1695	1.156209521	0.002670844	53.23609538	0.12297538
29.06495742	×ÔÉí³µÁ¾	Road 1	409.004939	83.30784988	0.001362344	0.229487136	0	0.011764706	436.8578	987.9424	644.2926	0.5754	3.9359	1696	1.160713884	0.002681249	53.25540434	0.123019984
29.08166688	×ÔÉí³µÁ¾	Road 1	409.3916398	83.31343918	0.001251837	0.230105609	0	0.011764706	437.1822	987.9463	644.2761	0.5774	3.9339	1697	1.188822001	0.002746179	53.27526891	0.123065871
29.09835801	×ÔÉí³µÁ¾	Road 1	409.7779472	83.32009277	0.001162591	0.22968632	0	0.011764706	437.692	987.9521	644.2499	0.5808	3.9305	1698	1.23506766	0.002853006	53.29588359	0.123113491
29.11496557	×ÔÉí³µÁ¾	Road 1	410.1623435	83.32509842	0.001094134	0.230047181	0	0.011764706	438.0164	987.9561	644.2333	0.5828	3.9285	1699	1.165119264	0.002691425	53.31523338	0.123158189
29.13163508	×ÔÉí³µÁ¾	Road 1	410.548195	83.32971268	0.001039652	0.230505779	0	0.011764706	438.3409	987.96	644.2168	0.5848	3.9266	1700	1.147453339	0.002650617	53.33436086	0.123202374
29.14828406	×ÔÉí³µÁ¾	Road 1	410.9336002	83.33596115	0.001012642	0.229840845	0	0.011764706	438.758	987.9648	644.1954	0.5865	3.9239	1701	1.218449591	0.002814619	53.35464681	0.123249234
29.1649499	×ÔÉí³µÁ¾	Road 1	411.3194192	83.34102859	0.001009874	0.23046127	0	0.011764706	439.1057	987.9688	644.1776	0.5889	3.9215	1702	1.167196022	0.002696223	53.37409911	0.123294169
29.18165057	×ÔÉí³µÁ¾	Road 1	411.7060808	83.34889755	0.001012642	0.230429471	0	0.011764706	439.6389	987.9756	644.1504	0.5917	3.9186	1703	1.287641058	0.002974451	53.39560357	0.123343844
29.19833254	×ÔÉí³µÁ¾	Road 1	412.092332	83.3537178	0.001012642	0.230410367	0	0.011764706	439.9634	987.9785	644.1338	0.5947	3.9156	1704	1.156442974	0.002671383	53.41489532	0.123388408
29.21496429	×ÔÉí³µÁ¾	Road 1	412.4774548	83.36115417	0.001012642	0.230616927	0	0.011764706	440.4734	987.9844	644.1077	0.5981	3.9122	1705	1.270456877	0.002934755	53.43602524	0.123437218
29.23163709	×ÔÉí³µÁ¾	Road 1	412.863551	83.36606369	0.001012642	0.23036097	0	0.011764706	440.798	987.9883	644.0911	0.6001	3.9102	1706	1.160541193	0.00268085	53.45537472	0.123481916
29.24834912	×ÔÉí³µÁ¾	Road 1	413.2505825	83.37190018	0.001012642	0.270627975	0	0	441.1458	987.9922	644.0733	0.6025	3.9078	1707	1.200065051	0.00277215	53.47543024	0.123528244
29.26501973	×ÔÉí³µÁ¾	Road 1	413.6367256	83.38718491	0.001012642	0.382254809	0	0	441.6328	987.998	644.0485	0.6055	3.9048	1708	1.609228275	0.003717317	53.50225705	0.123590214
29.28164488	×ÔÉí³µÁ¾	Road 1	414.0218721	83.399366	0.001007112	0.356935322	0	0	441.9575	988.002	644.0317	0.6074	3.9029	1709	1.476698997	0.003411175	53.5268074	0.123646925
29.2983987	×ÔÉí³µÁ¾	Road 1	414.4100435	83.40889664	0.001004355	0.297541201	0	0	442.2823	988.0059	644.0151	0.6094	3.9009	1710	1.358759513	0.003138734	53.54957181	0.123699511
29.31493221	×ÔÉí³µÁ¾	Road 1	414.793148	83.41699219	0.000998856	0.285496145	0	0	442.6303	988.0098	643.9973	0.6108	3.8984	1711	1.301760594	0.003007067	53.57109449	0.123749228
29.33162042	×ÔÉí³µÁ¾	Road 1	415.17988	83.4263237	0.000988827	0.325509876	0	0	442.9783	988.0137	643.9796	0.6132	3.896	1712	1.351991396	0.0031231	53.59365679	0.123801347
29.34834197	×ÔÉí³µÁ¾	Road 1	415.5674433	83.43885498	0.000980671	0.348662615	0	0	443.3728	988.0186	643.9595	0.6154	3.8937	1713	1.489309277	0.003440304	53.61856036	0.123858874
29.36496493	×ÔÉí³µÁ¾	Road 1	415.9527965	83.45516968	0.000968073	0.31102103	0	0	443.9066	988.0244	643.9321	0.6192	3.8899	1714	1.656869769	0.003827369	53.64610244	0.123922497
29.38164983	×ÔÉí³µÁ¾	Road 1	416.3396256	83.46377335	0.000948496	0.305358082	0	0	444.2315	988.0273	643.9154	0.6221	3.8869	1715	1.321081903	0.003051699	53.66814456	0.123973414
29.39829808	×ÔÉí³µÁ¾	Road 1	416.7256459	83.47263794	0.000930056	0.320640236	0	0	444.5565	988.0313	643.8989	0.6241	3.8849	1716	1.333314029	0.003079955	53.6903419	0.12402469
29.41499984	×ÔÉí³µÁ¾	Road 1	417.112979	83.4881218	0.000909277	0.332595915	0	0	445.0674	988.0371	643.8727	0.6275	3.8815	1717	1.6181797	0.003737995	53.71736836	0.124087121
29.43176062	×ÔÉí³µÁ¾	Road 1	417.5017258	83.49781036	0.000887963	0.32136175	0	0	445.3924	988.041	643.8561	0.6294	3.8795	1718	1.366515979	0.003156652	53.74027223	0.124140029
29.44841254	×ÔÉí³µÁ¾	Road 1	417.8879904	83.50708694	0.000866985	0.313990533	0	0	445.7176	988.0449	643.8395	0.6314	3.8775	1719	1.351508807	0.003121985	53.76277744	0.124192016
29.46493506	×ÔÉí³µÁ¾	Road 1	418.2713198	83.5215065	0.00084716	0.321834296	0	0	446.2286	988.0508	643.8134	0.6348	3.8741	1720	1.579479625	0.003648598	53.78887442	0.1242523
29.48165918	×ÔÉí³µÁ¾	Road 1	418.6593742	83.53177872	0.00082361	0.326788485	0	0	446.577	988.0547	643.7955	0.6372	3.8717	1721	1.393053987	0.003217955	53.81217203	0.124306117
29.49833675	×ÔÉí³µÁ¾	Road 1	419.0463991	83.54272385	0.000806039	0.323592812	0	0	446.9023	988.0576	643.7789	0.6401	3.8687	1722	1.423561718	0.003288428	53.83591358	0.12436096
29.51494321	×ÔÉí³µÁ¾	Road 1	419.4318317	83.55528259	0.000795774	0.31876722	0	0	447.3903	988.0635	643.7539	0.6431	3.8657	1723	1.495913245	0.00345556	53.8607554	0.124418345
29.53167357	×ÔÉí³µÁ¾	Road 1	419.8201835	83.5646553	0.000788719	0.320326	0	0	447.7156	988.0674	643.7373	0.6451	3.8638	1724	1.354496521	0.003128887	53.88341661	0.124470692
29.54829909	×ÔÉí³µÁ¾	Road 1	420.2061453	83.57406235	0.000787157	0.322793245	0	0	448.041	988.0703	643.7206	0.648	3.8608	1725	1.358657765	0.003138499	53.906005	0.124522872
29.56495137	×ÔÉí³µÁ¾	Road 1	420.5927748	83.58413544	0.000785597	0.323342592	0	0	448.3897	988.0742	643.7028	0.6494	3.8584	1726	1.387016608	0.003204008	53.92910199	0.124576226
29.58249328	×ÔÉí³µÁ¾	Road 1	421.0001479	83.60224228	0.000785597	0.320284188	0	0	449.0175	988.0811	643.6707	0.6539	3.8539	1727	1.695914899	0.003917563	53.95885158	0.124644947
29.59833547	×ÔÉí³µÁ¾	Road 1	421.3680721	83.60757751	0.000785597	0.319905341	0	0	449.2035	988.084	643.6611	0.6544	3.8535	1728	1.193604169	0.002757226	53.97776088	0.124688628
29.61500241	×ÔÉí³µÁ¾	Road 1	421.7552189	83.62233353	0.000785597	0.322392762	0	0	449.7151	988.0889	643.635	0.6587	3.8491	1729	1.590145596	0.003673236	54.00426375	0.124749849
29.63161913	×ÔÉí³µÁ¾	Road 1	422.1412432	83.6318573	0.000787157	0.321625024	0	0	450.0407	988.0928	643.6183	0.6607	3.8471	1730	1.364682966	0.003152418	54.02694031	0.124802232
29.6483154	×ÔÉí³µÁ¾	Road 1	422.5291584	83.64114761	0.000787157	0.320577115	0	0	450.3664	988.0967	643.6017	0.6627	3.8453	1731	1.352721738	0.003124787	54.04952571	0.124854404
29.66499627	×ÔÉí³µÁ¾	Road 1	422.9167841	83.65584869	0.000794203	0.320966989	0	0	450.8782	988.1016	643.5755	0.667	3.8399	1732	1.587747943	0.003667698	54.07601073	0.124915585
29.68166468	×ÔÉí³µÁ¾	Road 1	423.3041635	83.66520767	0.000798135	0.320927411	0	0	451.2039	988.1055	643.5588	0.669	3.8379	1733	1.356675092	0.003133919	54.09862434	0.124967822
29.69831586	×ÔÉí³µÁ¾	Road 1	423.6912077	83.6793045	0.000798923	0.321267039	0	0	451.6927	988.1113	643.5338	0.672	3.8349	1734	1.563007602	0.003610548	54.12465026	0.125027942
29.71493661	×ÔÉí³µÁ¾	Road 1	424.0775884	83.68877335	0.000798923	0.320598066	0	0	452.0185	988.1143	643.5171	0.6749	3.8319	1735	1.362916975	0.003148338	54.14730297	0.12508027
29.73162628	×ÔÉí³µÁ¾	Road 1	424.465614	83.69802246	0.000798923	0.320798129	0	0	452.3444	988.1182	643.5005	0.6769	3.8299	1736	1.351811373	0.003122684	54.16986426	0.125132386
29.74828772	×ÔÉí³µÁ¾	Road 1	424.8530304	83.70816422	0.000798923	0.321378112	0	0	452.6936	988.1221	643.4827	0.6793	3.8274	1737	1.391369891	0.003214064	54.19304649	0.125185937
29.764951	×ÔÉí³µÁ¾	Road 1	425.2405574	83.72287216	0.00079185	0.320459664	0	0	453.2058	988.1279	643.4564	0.6827	3.824	1738	1.589751042	0.003672325	54.21953695	0.12524713
29.78161318	×ÔÉí³µÁ¾	Road 1	425.6281052	83.73288345	0.000788719	0.32043004	0	0	453.5551	988.1318	643.4385	0.6852	3.8215	1739	1.386007657	0.003201678	54.24263085	0.125300477
29.79838642	×ÔÉí³µÁ¾	Road 1	426.0182795	83.7421463	0.000785597	0.321479052	0	0	453.8812	988.1348	643.4219	0.6883	3.8185	1740	1.350960108	0.003120718	54.26529083	0.125352822
29.81492873	×ÔÉí³µÁ¾	Road 1	426.4031459	83.75607147	0.000785597	0.320810854	0.011764706	0	454.3703	988.1406	643.3969	0.6919	3.8155	1741	1.560688905	0.003605191	54.29110824	0.12541246
29.83167888	×ÔÉí³µÁ¾	Road 1	426.792895	83.76622009	0.000785597	0.32178998	0.011764706	0	454.7198	988.1445	643.379	0.6942	3.8131	1742	1.390090126	0.003211108	54.31439245	0.125466247
29.84832823	×ÔÉí³µÁ¾	Road 1	427.180342	83.77562027	0.000785597	0.322279006	0.011764706	0	455.046	988.1475	643.3623	0.6972	3.81	1743	1.360326271	0.003142354	54.337041	0.125518565
29.86492443	×ÔÉí³µÁ¾	Road 1	427.5666174	83.78975143	0.000785597	0.321999192	0.011764706	0	455.5353	988.1533	643.3372	0.6992	3.807	1744	1.568203192	0.003622549	54.36306721	0.125578685
29.88162252	×ÔÉí³µÁ¾	Road 1	427.9553084	83.79922714	0.000785597	0.323069304	0.011764706	0	455.8616	988.1563	643.3206	0.7021	3.804	1745	1.362706756	0.003147853	54.38582182	0.125631248
29.89832319	×ÔÉí³µÁ¾	Road 1	428.3441029	83.80865479	0.000787157	0.323038995	0.011764706	0	456.1879	988.1602	643.3039	0.7041	3.802	1746	1.360678923	0.003143168	54.40854606	0.125683741
29.91499856	×ÔÉí³µÁ¾	Road 1	428.732378	83.82363739	0.000787157	0.323139518	0.011764706	0	456.7007	988.165	643.2776	0.7085	3.7975	1747	1.602769047	0.003702396	54.43527283	0.12574548
29.93162115	×ÔÉí³µÁ¾	Road 1	429.1194705	83.83369675	0.000789501	0.323388994	0.011764706	0	457.0504	988.1689	643.2597	0.7108	3.7951	1748	1.390446522	0.003211931	54.45838565	0.125798871
29.94835261	×ÔÉí³µÁ¾	Road 1	429.5091424	83.84319305	0.00079185	0.323789686	0.011764706	0	457.3769	988.1729	643.243	0.7128	3.7931	1749	1.36333661	0.003149308	54.48119626	0.125851563
29.96785413	×ÔÉí³µÁ¾	Road 1	429.9634094	83.85814133	0.000793418	0.323730141	0.011764706	0	457.89	988.1787	643.2168	0.7162	3.7896	1750	1.507676299	0.003482732	54.51059824	0.125919482
29.98158898	×ÔÉí³µÁ¾	Road 1	430.2833819	83.86696472	0.000794203	0.324149877	0.011764706	0	458.1932	988.1816	643.2013	0.7187	3.787	1751	1.417876783	0.003275295	54.53007257	0.125964468
29.9983439	×ÔÉí³µÁ¾	Road 1	430.6737778	83.88137054	0.000795774	0.323799849	0.011764706	0	458.6831	988.1865	643.1762	0.7227	3.783	1752	1.575624488	0.003639693	54.55647203	0.12602545
30.01495769	×ÔÉí³µÁ¾	Road 1	431.0609294	83.89088745	0.000795774	0.324260384	0.011764706	0	459.0097	988.1904	643.1595	0.7247	3.781	1753	1.367754383	0.003159513	54.57919561	0.126077942
30.06498674	×ÔÉí³µÁ¾	Road 1	432.2271828	83.92149124	0.000795774	0.324810147	0.011764706	0	460.0598	988.2012	643.1058	0.7328	3.7727	1754	1.396290481	0.003225431	54.6490507	0.126239307
30.08164159	×ÔÉí³µÁ¾	Road 1	432.615499	83.93582153	0.000795774	0.3247706	0.011764706	0	460.55	988.207	643.0807	0.7359	3.7696	1755	1.576910514	0.003642663	54.6753139	0.126299975
30.09828653	×ÔÉí³µÁ¾	Road 1	433.0036285	83.94537964	0.000795774	0.325170338	0.019607844	0	460.8769	988.21	643.064	0.7389	3.7666	1756	1.369465534	0.003163465	54.69810858	0.126352631
30.11799113	×ÔÉí³µÁ¾	Road 1	433.4632007	83.96316376	0.000795774	0.32599026	0.027450981	0	461.484	988.2168	643.033	0.7431	3.7624	1757	1.607864983	0.003714168	54.72979091	0.126425817
30.13362548	×ÔÉí³µÁ¾	Road 1	433.8278841	83.97277679	0.000795774	0.327238202	0.027450981	0	461.8109	988.2197	643.0162	0.7461	3.7594	1758	1.399298808	0.00323238	54.75166804	0.126476353
30.14886029	×ÔÉí³µÁ¾	Road 1	434.1832886	83.9824379	0.000796561	0.327658683	0.027450981	0	462.1379	988.2236	642.9995	0.7481	3.7574	1759	1.413417547	0.003264995	54.77320118	0.126526095
30.16493267	×ÔÉí³µÁ¾	Road 1	434.5582757	83.99210587	0.000796561	0.326759696	0.035294119	0	462.465	988.2266	642.9827	0.7511	3.7544	1760	1.389869529	0.003210599	54.7955397	0.126577697
30.18171325	×ÔÉí³µÁ¾	Road 1	434.9498537	84.00671082	0.000796561	0.327758521	0.035294119	0	462.9556	988.2324	642.9576	0.7532	3.7513	1761	1.585189729	0.003661788	54.8221401	0.126639144
30.19838275	×ÔÉí³µÁ¾	Road 1	435.3388851	84.01644745	0.000796561	0.32861805	0.035294119	0	463.2827	988.2354	642.9409	0.7562	3.7483	1762	1.377531907	0.003182099	54.84510288	0.126692188
30.21490674	×ÔÉí³µÁ¾	Road 1	435.7245644	84.02607422	0.000796561	0.32885778	0.043137256	0	463.6099	988.2393	642.9242	0.7583	3.7463	1763	1.376563075	0.003179861	54.86784918	0.126744732
30.23166972	×ÔÉí³µÁ¾	Road 1	436.1158675	84.03584518	0.000796561	0.329257816	0.043137256	0	463.937	988.2422	642.9074	0.7613	3.7432	1764	1.376902724	0.003180645	54.89093017	0.126798049
30.24824649	×ÔÉí³µÁ¾	Road 1	436.5029012	84.0526474	0.000796561	0.330087215	0.043137256	0	464.498	988.248	642.8787	0.7656	3.7389	1765	1.689929028	0.003903736	54.91894374	0.12686276
30.26493945	×ÔÉí³µÁ¾	Road 1	436.8926938	84.06255569	0.000796561	0.329807818	0.043137256	0	464.8253	988.252	642.8619	0.7677	3.7369	1766	1.384996685	0.003199342	54.94206344	0.126916167
30.28162436	×ÔÉí³µÁ¾	Road 1	437.2823664	84.07729111	0.000798923	0.330896974	0.043137256	0	465.3164	988.2568	642.8369	0.7717	3.7328	1767	1.595575759	0.00368578	54.96868547	0.126977663
30.29834995	×ÔÉí³µÁ¾	Road 1	437.6730344	84.08700714	0.000801291	0.330128014	0.043137256	0	465.6438	988.2598	642.8201	0.7747	3.7298	1768	1.376118836	0.003178835	54.99170187	0.127030831
30.31490362	×ÔÉí³µÁ¾	Road 1	438.0597352	84.09751282	0.000802871	0.330798	0.043137256	0	465.9946	988.2637	642.8022	0.7772	3.7274	1769	1.415301661	0.003269347	55.01513031	0.127084951
30.33161052	×ÔÉí³µÁ¾	Road 1	438.4500647	84.10814209	0.000805246	0.330038756	0.043137256	0	466.3455	988.2676	642.7842	0.7796	3.7249	1770	1.416588873	0.00327232	55.03879712	0.127139621
30.34834381	×ÔÉí³µÁ¾	Road 1	438.8410819	84.12346115	0.00081001	0.330698341	0.043137256	0	466.8601	988.2725	642.7579	0.7841	3.7205	1771	1.619783489	0.0037417	55.06590142	0.127202232
30.36492937	×ÔÉí³µÁ¾	Road 1	439.2286925	84.13326645	0.000816391	0.329770237	0.043137256	0	467.1877	988.2764	642.7411	0.7862	3.7185	1772	1.384189191	0.003197477	55.08885898	0.127255264
30.38160768	×ÔÉí³µÁ¾	Road 1	439.6185157	84.14307175	0.00082522	0.330618978	0.043137256	0	467.5154	988.2793	642.7244	0.7892	3.7155	1773	1.381925288	0.003192247	55.11190715	0.127308506
30.3983274	×ÔÉí³µÁ¾	Road 1	440.0093759	84.15788269	0.000832491	0.329830408	0.043137256	0	468.0068	988.2842	642.6992	0.7932	3.7115	1774	1.598764966	0.003693147	55.13863806	0.127370254
30.41496759	×ÔÉí³µÁ¾	Road 1	440.3984248	84.1682991	0.000839804	0.330519766	0.043137256	0	468.358	988.2881	642.6812	0.7957	3.709	1775	1.4099393	0.00325696	55.16209971	0.12742445
30.4317181	×ÔÉí³µÁ¾	Road 1	440.7900989	84.17811127	0.000850443	0.329591185	0.043137256	0	468.6857	988.291	642.6644	0.7987	3.7061	1776	1.380830381	0.003189718	55.18522933	0.12747788
30.44824282	×ÔÉí³µÁ¾	Road 1	441.1765415	84.18862381	0.000862	0.330440432	0.043137256	0	469.0369	988.2949	642.6465	0.8012	3.7036	1777	1.417621388	0.003274705	55.20865513	0.127531993
30.46497611	×ÔÉí³µÁ¾	Road 1	441.5679339	84.20417633	0.000871989	0.331030577	0.043137256	0	469.5521	988.3008	642.6202	0.8047	3.7002	1778	1.631200589	0.003768073	55.23595048	0.127595046
30.48163719	×ÔÉí³µÁ¾	Road 1	441.9576862	84.21473694	0.000883741	0.331429869	0.043137256	0	469.9034	988.3037	642.6022	0.8082	3.6967	1779	1.416278323	0.003271603	55.2595472	0.127649554
30.49832172	×ÔÉí³µÁ¾	Road 1	442.3480327	84.22453537	0.000893048	0.332068622	0.043137256	0	470.2314	988.3076	642.5854	0.8092	3.6947	1780	1.382513456	0.003193606	55.28261379	0.127702838
30.51492452	×ÔÉí³µÁ¾	Road 1	442.7365352	84.23938065	0.000904131	0.332455784	0.043137256	0	470.7233	988.3125	642.5602	0.8133	3.6907	1781	1.606069303	0.00371002	55.30927903	0.127764435
30.53164424	×ÔÉí³µÁ¾	Road 1	443.1278201	84.24933014	0.00091358	0.332866043	0.043137256	0	471.0514	988.3154	642.5435	0.8163	3.6877	1782	1.388509682	0.003207457	55.33249453	0.127818062
30.5482474	×ÔÉí³µÁ¾	Road 1	443.5164463	84.26432648	0.000918762	0.334136218	0.043137256	0	471.5435	988.3203	642.5182	0.8204	3.6837	1783	1.61306608	0.003726183	55.35927653	0.127879929
30.56496236	×ÔÉí³µÁ¾	Road 1	443.9077363	84.2744545	0.00092136	0.334306866	0.043137256	0	471.8716	988.3242	642.5015	0.8224	3.6817	1784	1.396735664	0.003226459	55.38262291	0.127933859
30.58223376	×ÔÉí³µÁ¾	Road 1	444.3120993	84.2842804	0.000924832	0.33517611	0.043137256	0	472.1998	988.3271	642.4846	0.8255	3.6787	1785	1.369905665	0.003164482	55.40628309	0.127988514
30.59826472	×ÔÉí³µÁ¾	Road 1	444.68747	84.29525986	0.000924832	0.335106701	0.043137256	0	472.5514	988.3311	642.4667	0.8279	3.6762	1786	1.454524885	0.003359952	55.42960053	0.128042377
30.61491407	×ÔÉí³µÁ¾	Road 1	445.0773933	84.31104584	0.000925701	0.337065339	0.043137256	0	473.0673	988.3359	642.4403	0.8324	3.6718	1787	1.646518957	0.003803459	55.45701399	0.128105702
30.63162207	×ÔÉí³µÁ¾	Road 1	445.4687373	84.32119446	0.000925701	0.337026864	0.043137256	0	473.3956	988.3389	642.4235	0.8355	3.6688	1788	1.398426298	0.003230365	55.4803789	0.128159675
30.64828534	×ÔÉí³µÁ¾	Road 1	445.8590803	84.33124695	0.000925701	0.337656885	0.043137256	0	473.7239	988.3428	642.4067	0.8375	3.6668	1789	1.395541327	0.0032237	55.50363319	0.128213393
30.66490463	×ÔÉí³µÁ¾	Road 1	446.2484668	84.34725952	0.000925701	0.338935584	0.043137256	0	474.24	988.3477	642.3802	0.842	3.6623	1790	1.658283766	0.003830635	55.53119268	0.128277055
30.68159906	×ÔÉí³µÁ¾	Road 1	446.6396619	84.3576004	0.000925701	0.338656336	0.043137256	0	474.5684	988.3506	642.3635	0.845	3.6593	1791	1.407654945	0.003251683	55.55469269	0.12833134
30.69825648	×ÔÉí³µÁ¾	Road 1	447.0300373	84.36794128	0.000925701	0.339266002	0.043137256	0	474.8969	988.3545	642.3467	0.8471	3.6573	1792	1.408794429	0.003254315	55.57815955	0.128385549
30.71491682	×ÔÉí³µÁ¾	Road 1	447.4205566	84.38417358	0.000925701	0.338517606	0.035294119	0	475.4132	988.3594	642.3203	0.8516	3.6529	1793	1.666762898	0.003850222	55.6059284	0.128449695
30.73164021	×ÔÉí³µÁ¾	Road 1	447.8126042	84.39505692	0.000925701	0.339417487	0.035294119	0	475.7653	988.3633	642.3022	0.8541	3.6504	1794	1.431018887	0.003305654	55.62985988	0.128504976
30.74826207	×ÔÉí³µÁ¾	Road 1	448.2023185	84.4052124	0.00092136	0.339357823	0.035294119	0	476.0939	988.3662	642.2854	0.8571	3.6474	1795	1.402118067	0.003238893	55.65316569	0.128558813
30.76490628	×ÔÉí³µÁ¾	Road 1	448.5926275	84.42047653	0.000918762	0.339538693	0.035294119	0	476.5869	988.3711	642.2603	0.8602	3.6433	1796	1.625610121	0.003755159	55.68022269	0.128621314
30.78163041	×ÔÉí³µÁ¾	Road 1	448.984859	84.43092728	0.00091358	0.338130504	0.035294119	0	476.9156	988.374	642.2434	0.8633	3.6403	1797	1.412608039	0.003263125	55.70384732	0.128675887
30.79831164	×ÔÉí³µÁ¾	Road 1	449.3761553	84.44617081	0.000906701	0.339199841	0.035294119	0	477.4088	988.3789	642.2181	0.8674	3.6362	1798	1.623627334	0.003750579	55.73093144	0.128738452
30.81495622	×ÔÉí³µÁ¾	Road 1	449.7666289	84.45421829	0.000899857	0.339180142	0.035294119	0	477.5733	988.3809	642.2097	0.8684	3.6352	1799	1.309724969	0.003025465	55.75273126	0.128788809
30.83162427	×ÔÉí³µÁ¾	Road 1	450.1577134	84.46727829	0.000892199	0.338910401	0.035294119	0	478.0901	988.3857	642.1833	0.8729	3.6307	1800	1.52887612	0.003531704	55.77821463	0.128847676
30.84829231	×ÔÉí³µÁ¾	Road 1	450.5488457	84.47760544	0.000883741	0.338621259	0.035294119	0	478.419	988.3887	642.1665	0.8759	3.6276	1801	1.409345267	0.003255588	55.80170566	0.12890194
30.86489437	×ÔÉí³µÁ¾	Road 1	450.9385071	84.49440765	0.000873662	0.339010388	0.043137256	0	478.9594	988.3945	642.1388	0.8799	3.6237	1802	1.696107107	0.003918007	55.82986453	0.128966987
30.88162069	×ÔÉí³µÁ¾	Road 1	451.3311327	84.50464554	0.000859515	0.338965774	0.043137256	0	479.2885	988.3975	642.1219	0.8829	3.6197	1803	1.404226967	0.003243764	55.85335209	0.129021243
30.89829533	×ÔÉí³µÁ¾	Road 1	451.7225925	84.51489716	0.00084716	0.33981505	0.043137256	0	479.6175	988.4004	642.1051	0.886	3.6166	1804	1.406347963	0.003248664	55.87680243	0.129075414
30.9149729	×ÔÉí³µÁ¾	Road 1	452.1141928	84.53035355	0.000830871	0.340650022	0.043137256	0	480.1112	988.4053	642.0798	0.8901	3.6125	1805	1.634415582	0.0037755	55.90406051	0.12913838
30.93170033	×ÔÉí³µÁ¾	Road 1	452.5070111	84.54056396	0.000811602	0.340390712	0.043137256	0	480.4403	988.4082	642.063	0.8931	3.6095	1806	1.403467461	0.00324201	55.92753691	0.12919261
30.94823714	×ÔÉí³µÁ¾	Road 1	452.8954009	84.55095291	0.000796561	0.340560347	0.043137256	0	480.7696	988.4121	642.0461	0.8952	3.6074	1807	1.416631021	0.003272418	55.95096347	0.129246726
30.96486816	×ÔÉí³µÁ¾	Road 1	453.2860778	84.56707535	0.000780153	0.341180146	0.043137256	0	481.287	988.417	642.0197	0.8997	3.6029	1808	1.666154022	0.003848816	55.97867331	0.129310735
30.98153803	×ÔÉí³µÁ¾	Road 1	453.6777197	84.57837753	0.000759392	0.341109604	0.043137256	0	481.6398	988.4199	642.0016	0.9032	3.5994	1809	1.453365815	0.003357275	56.00290074	0.129366701
30.99824823	×ÔÉí³µÁ¾	Road 1	454.0703565	84.58862228	0.000741999	0.340860248	0.043137256	0	481.9691	988.4229	641.9847	0.9063	3.5964	1810	1.406056507	0.003247991	56.02639622	0.129420975
31.01495549	×ÔÉí³µÁ¾	Road 1	454.4629964	84.60415421	0.000726352	0.341680169	0.043137256	0	482.4633	988.4277	641.9595	0.9094	3.5923	1811	1.637681375	0.003783044	56.05375739	0.12948418
31.03158248	×ÔÉí³µÁ¾	Road 1	454.8537972	84.61440582	0.000708014	0.341440767	0.043137256	0	482.7927	988.4307	641.9426	0.9124	3.5892	1812	1.40893898	0.003254649	56.0771838	0.129538295
31.04828974	×ÔÉí³µÁ¾	Road 1	455.2465574	84.63007507	0.000692134	0.341579646	0.043137256	0	483.287	988.4355	641.9174	0.9165	3.5851	1813	1.644101791	0.003797875	56.10465224	0.129601747
31.06490426	×ÔÉí³µÁ¾	Road 1	455.6371854	84.64044342	0.000678612	0.3419936	0.043137256	0	483.6165	988.4385	641.9005	0.9196	3.5821	1814	1.414756955	0.003268089	56.12815775	0.129656044
31.08198028	×ÔÉí³µÁ¾	Road 1	456.0387129	84.6508255	0.000665965	0.341950297	0.043137256	0	483.9461	988.4424	641.8837	0.9217	3.58	1815	1.403144688	0.003241264	56.15211788	0.129711392
31.13173295	×ÔÉí³µÁ¾	Road 1	457.2090535	84.68342743	0.000656929	0.341840625	0.043137256	0	484.8645	988.4512	641.8367	0.9296	3.5721	1816	1.438111523	0.003322038	56.22366776	0.129876673
31.14820158	×ÔÉí³µÁ¾	Road 1	457.5965432	84.70421219	0.000649348	0.342185467	0.043137256	0	485.6418	988.458	641.7968	0.9368	3.5648	1817	1.882555643	0.004348704	56.25467088	0.12994829
31.16491911	×ÔÉí³µÁ¾	Road 1	457.9899376	84.7146904	0.000628297	0.341057092	0.043137256	0	485.9716	988.4609	641.78	0.9399	3.5617	1818	1.417730684	0.003274958	56.27837183	0.130003039
31.18158385	×ÔÉí³µÁ¾	Road 1	458.3821371	84.72486649	0.000618277	0.342335075	0.043137256	0	486.3015	988.4648	641.7631	0.942	3.5597	1819	1.406045806	0.003247966	56.30180322	0.130057165
31.19821964	×ÔÉí³µÁ¾	Road 1	458.773707	84.73610001	0.000609021	0.34206605	0.043137256	0	486.655	988.4678	641.745	0.9455	3.5562	1820	1.453511886	0.003357612	56.32598353	0.130113022
31.21493606	×ÔÉí³µÁ¾	Road 1	459.1672512	84.75251083	0.000595311	0.341746777	0.043137256	0	487.1736	988.4727	641.7184	0.95	3.5516	1821	1.678155886	0.00387654	56.3540363	0.130177824
31.23158211	×ÔÉí³µÁ¾	Road 1	459.5591895	84.76354523	0.000581809	0.342392892	0.043137256	0	487.5272	988.4756	641.7003	0.9535	3.5481	1822	1.444818918	0.003337532	56.37808683	0.130233381
31.24826518	×ÔÉí³µÁ¾	Road 1	459.9520472	84.77382431	0.000565376	0.342139065	0.043137256	0	487.8572	988.4785	641.6835	0.9566	3.5451	1823	1.410715924	0.003258754	56.4016219	0.130287747
31.26490353	×ÔÉí³µÁ¾	Road 1	460.3439238	84.7894043	0.0005511	0.34253329	0.043137256	0	488.3524	988.4834	641.6581	0.9607	3.541	1824	1.645548028	0.003801216	56.4290011	0.130350993
31.2816874	×ÔÉí³µÁ¾	Road 1	460.7392763	84.79979324	0.000534651	0.342034608	0.043137256	0	488.6826	988.4863	641.6412	0.9638	3.5379	1825	1.413140883	0.003264355	56.45271908	0.130405781
31.29833309	×ÔÉí³µÁ¾	Road 1	461.1314456	84.8153595	0.000519714	0.342431843	0.043137256	0	489.1779	988.4912	641.6158	0.9679	3.5338	1826	1.645053082	0.003800073	56.48010211	0.130469036
31.31494798	×ÔÉí³µÁ¾	Road 1	461.5229378	84.82583084	0.000505059	0.341697901	0.043137256	0	489.5082	988.4941	641.5989	0.9709	3.5307	1827	1.421732316	0.003284202	56.50372404	0.130523603
31.3316897	×ÔÉí³µÁ¾	Road 1	461.9174735	84.83768921	0.000488975	0.342097938	0.043137256	0	489.8857	988.498	641.5797	0.9739	3.5277	1828	1.479122445	0.003416773	56.52848709	0.130580805
31.348243	×ÔÉí³µÁ¾	Road 1	462.3076165	84.84796829	0.000474906	0.341847897	0.043137256	0	490.2161	988.501	641.5627	0.9769	3.5247	1829	1.415228713	0.003269178	56.55191381	0.130634921
31.36497299	×ÔÉí³µÁ¾	Road 1	462.7019959	84.86353455	0.000461656	0.342237562	0.043137256	0	490.7117	988.5059	641.5374	0.98	3.5206	1830	1.6423613	0.003793855	56.57939049	0.130698392
31.38161794	×ÔÉí³µÁ¾	Road 1	463.0943981	84.86946716	0.000443843	0.342217565	0.043137256	0	490.9005	988.5078	641.5277	0.9815	3.5191	1831	1.221500437	0.002821666	56.59972231	0.130745359
31.39984128	×ÔÉí³µÁ¾	Road 1	463.5240936	84.88585052	0.000428573	0.341912925	0.043137256	0	491.4199	988.5127	641.5011	0.986	3.5145	1832	1.619672688	0.003741444	56.62923815	0.13081354
31.41494596	×ÔÉí³µÁ¾	Road 1	463.8803182	84.90141678	0.000414674	0.341853082	0.043137256	0	491.9157	988.5166	641.4757	0.9911	3.5094	1833	1.716412147	0.003964912	56.65516401	0.130873429
31.43157881	×ÔÉí³µÁ¾	Road 1	464.2726302	84.9116684	0.000395134	0.342043787	0.043137256	0	492.2463	988.5195	641.4589	0.9941	3.5064	1834	1.412675414	0.00326328	56.67866083	0.130927707
31.44833593	×ÔÉí³µÁ¾	Road 1	464.6679214	84.92202988	0.000379567	0.34160313	0.043137256	0	492.577	988.5225	641.4419	0.9971	3.5033	1835	1.414268095	0.003266959	56.70235988	0.130982451
31.46494312	×ÔÉí³µÁ¾	Road 1	465.0597476	84.93755493	0.00036255	0.341493875	0.043137256	0	493.0731	988.5273	641.4165	1.0012	3.4991	1836	1.646761098	0.003804018	56.72970796	0.131045625
31.48157194	×ÔÉí³µÁ¾	Road 1	465.4521222	84.94654312	0.000344246	0.341685593	0.043137256	0	493.2857	988.5293	641.4056	1.0031	3.4972	1837	1.357466684	0.003135748	56.75228103	0.131097769
31.49907463	×ÔÉí³µÁ¾	Road 1	465.8652065	84.96428604	0.000329618	0.341156483	0.043137256	0	493.9236	988.5352	641.373	1.0088	3.4915	1838	1.705092835	0.003938764	56.78212474	0.131166708
31.51489739	×ÔÉí³µÁ¾	Road 1	466.238688	84.97463379	0.00031414	0.341561258	0.043137256	0	494.2545	988.5381	641.356	1.0118	3.4884	1839	1.441132883	0.003329017	56.80492744	0.131219382
31.5316875	×ÔÉí³µÁ¾	Road 1	466.6350574	84.98636169	0.000298744	0.341751099	0.043137256	0	494.6327	988.542	641.3367	1.0148	3.4855	1840	1.473983748	0.003404902	56.82967578	0.131276551
31.54822688	×ÔÉí³µÁ¾	Road 1	467.0255559	84.99680557	0.000283465	0.341472298	0.043137256	0	494.9636	988.5449	641.3197	1.0178	3.4824	1841	1.424887087	0.003291489	56.85324253	0.13133099
31.56489748	×ÔÉí³µÁ¾	Road 1	467.4192241	85.0122345	0.000268716	0.34164694	0.043137256	0	495.4601	988.5498	641.2943	1.0219	3.4782	1842	1.641097248	0.003790935	56.88060062	0.131394187
31.58161428	×ÔÉí³µÁ¾	Road 1	467.814007	85.01739807	0.000252653	0.341182739	0.043137256	0	495.6256	988.5508	641.2859	1.0239	3.4762	1843	1.188183317	0.002744703	56.90046323	0.13144007
31.5982145	×ÔÉí³µÁ¾	Road 1	468.2061085	85.03290939	0.000239708	0.342012107	0.043137256	0	496.1222	988.5557	641.2604	1.028	3.4721	1844	1.647953476	0.003806773	56.92781964	0.131503263
31.61492177	×ÔÉí³µÁ¾	Road 1	468.6008102	85.04840698	0.000226873	0.341507047	0.043137256	0	496.6189	988.5605	641.235	1.0321	3.4681	1845	1.64319574	0.003795782	56.95527294	0.13156668
31.63161583	×ÔÉí³µÁ¾	Road 1	468.9952276	85.05431213	0.000213194	0.34148708	0.043137256	0	496.8082	988.5615	641.2253	1.0345	3.4657	1846	1.221527446	0.002821728	56.9756652	0.131613787
31.64822119	×ÔÉí³µÁ¾	Road 1	469.3876206	85.06981659	0.000202909	0.340568721	0.043137256	0	497.305	988.5664	641.2	1.0386	3.4617	1847	1.64802234	0.003806932	57.00303121	0.131677002
31.66487274	×ÔÉí³µÁ¾	Road 1	469.7811766	85.08527985	0.000193265	0.341357261	0.043137256	0	497.8019	988.5713	641.1745	1.0427	3.4577	1848	1.644544333	0.003798897	57.03041541	0.13174026
31.68159027	×ÔÉí³µÁ¾	Road 1	470.1763404	85.09571686	0.000185417	0.341337711	0.043137256	0	498.0149	988.5732	641.1636	1.0446	3.4559	1849	1.42094601	0.003282385	57.05417011	0.131795133
31.69830706	×ÔÉí³µÁ¾	Road 1	470.5715382	85.10675812	0.000179235	0.341037244	0.043137256	0	498.4883	988.5771	641.1393	1.0493	3.4513	1850	1.447693403	0.003344172	57.07837091	0.131851037
31.71491755	×ÔÉí³µÁ¾	Road 1	470.9642701	85.11698227	0.000173762	0.341233402	0.043137256	0	498.8197	988.5801	641.1223	1.0523	3.4482	1851	1.414760008	0.003268096	57.10187077	0.131905321
31.73161382	×ÔÉí³µÁ¾	Road 1	471.3590887	85.12960968	0.000170363	0.340500504	0.043137256	0	499.2222	988.584	641.1018	1.0557	3.4446	1852	1.518479839	0.003507688	57.12722371	0.131963887
31.74825803	×ÔÉí³µÁ¾	Road 1	471.7527375	85.14285507	0.000169521	0.340894938	0.043137256	0	499.6484	988.5879	641.08	1.0595	3.4406	1853	1.547724956	0.003575245	57.15298438	0.132023394
31.76491215	×ÔÉí³µÁ¾	Road 1	472.1466813	85.1559906	0.000169521	0.340644866	0.043137256	0	500.0036	988.5918	641.0618	1.062	3.438	1854	1.542715544	0.003563673	57.17867693	0.132082744
31.78160768	×ÔÉí³µÁ¾	Road 1	472.5416702	85.1700943	0.000169521	0.340804517	0.043137256	0	500.5247	988.5957	641.0352	1.0676	3.4323	1855	1.584157053	0.003659403	57.20512528	0.132143839
31.79827939	×ÔÉí³µÁ¾	Road 1	472.9361426	85.18027725	0.000172624	0.340988994	0.043137256	0	500.8564	988.5996	641.0181	1.0697	3.4303	1856	1.412106516	0.003261966	57.22866751	0.132198222
31.81494559	×ÔÉí³µÁ¾	Road 1	473.3305598	85.19646835	0.000178074	0.340922594	0.043137256	0	501.3777	988.6035	640.9915	1.0754	3.4248	1857	1.677848111	0.003875829	57.25663087	0.132262817
31.83157478	×ÔÉí³µÁ¾	Road 1	473.7241281	85.20235291	0.000187209	0.34044835	0.043137256	0	501.5672	988.6055	640.9818	1.0769	3.4234	1858	1.223235531	0.002825674	57.27697228	0.132309806
31.84819993	×ÔÉí³µÁ¾	Road 1	474.1176863	85.22083054	0.000198203	0.340587765	0.043137256	0	502.1597	988.6113	640.9514	1.0818	3.4185	1859	1.781278956	0.004114754	57.30658632	0.132378214
31.8649039	×ÔÉí³µÁ¾	Road 1	474.5131573	85.23101349	0.00021189	0.340337634	0.043137256	0	502.4916	988.6143	640.9344	1.0849	3.4153	1860	1.411900215	0.003261489	57.33017065	0.132432694
31.88172663	×ÔÉí³µÁ¾	Road 1	474.9115128	85.24655228	0.000229608	0.340747625	0.043137256	0	502.9894	988.6191	640.909	1.089	3.4111	1861	1.643439192	0.003796345	57.35781778	0.132496559
31.89819306	×ÔÉí³µÁ¾	Road 1	475.3014778	85.2567215	0.000249374	0.340666205	0.043137256	0	503.3214	988.6221	640.892	1.092	3.408	1862	1.41809987	0.003275811	57.38116883	0.1325505
31.91491095	×ÔÉí³µÁ¾	Road 1	475.6974492	85.26773529	0.000270244	0.340636164	0.043137256	0	503.6771	988.625	640.8738	1.0955	3.4045	1863	1.448621816	0.003346316	57.40538674	0.132606443
31.93156213	×ÔÉí³µÁ¾	Road 1	476.0919083	85.28241577	0.000297519	0.340131521	0.043137256	0	504.1515	988.6289	640.8495	1.1001	3.3997	1864	1.613033925	0.003726108	57.43224565	0.132668487
31.94818509	×ÔÉí³µÁ¾	Road 1	476.4857462	85.29268799	0.000324836	0.340541154	0.043137256	0	504.4836	988.6328	640.8325	1.1024	3.3976	1865	1.418852166	0.003277549	57.45583117	0.13272297
31.96487916	×ÔÉí³µÁ¾	Road 1	476.8813166	85.30296021	0.000351948	0.340493351	0.043137256	0	504.8157	988.6357	640.8155	1.1057	3.3945	1866	1.417046537	0.003273378	57.47948744	0.132777616
31.98153767	×ÔÉí³µÁ¾	Road 1	477.2760954	85.31396027	0.000381972	0.340453416	0.043137256	0	505.1716	988.6387	640.7973	1.1094	3.3909	1867	1.450368129	0.00335035	57.50364841	0.132833428
31.99827462	×ÔÉí³µÁ¾	Road 1	477.6728149	85.33156586	0.000408595	0.339934498	0.043137256	0	505.7411	988.6436	640.7682	1.115	3.3854	1868	1.739315528	0.004017819	57.53275925	0.132900674
32.01487118	×ÔÉí³µÁ¾	Road 1	478.0662545	85.34192047	0.000431703	0.340103894	0.043137256	0	506.0734	988.6465	640.7512	1.118	3.3823	1869	1.423883866	0.003289172	57.55639083	0.132955263
32.03157955	×ÔÉí³µÁ¾	Road 1	478.4623916	85.35207596	0.000455124	0.340303063	0.043137256	0	506.4057	988.6494	640.7341	1.1211	3.3792	1870	1.412148864	0.003262064	57.57998553	0.133009767
32.04822743	×ÔÉí³µÁ¾	Road 1	478.8571697	85.36828766	0.000472125	0.339998752	0.043137256	0	506.9281	988.6543	640.7074	1.1256	3.3746	1871	1.682328668	0.003886179	57.60799273	0.133074463
32.06491563	×ÔÉí³µÁ¾	Road 1	479.252951	85.37844315	0.000481625	0.340194225	0.043137256	0	507.2605	988.6572	640.6904	1.1287	3.3716	1872	1.413034186	0.003264109	57.63157373	0.133128935
32.08153089	×ÔÉí³µÁ¾	Road 1	479.6470495	85.38867416	0.000487272	0.34015432	0.043137256	0	507.593	988.6611	640.6733	1.1307	3.3695	1873	1.41849305	0.003276719	57.65514236	0.133183379
32.09822349	×ÔÉí³µÁ¾	Road 1	480.0430301	85.39893265	0.000487272	0.340114444	0.043137256	0	507.9255	988.6641	640.6564	1.1338	3.3664	1874	1.417736129	0.00327497	57.67880806	0.133238047
32.11491095	×ÔÉí³µÁ¾	Road 1	480.4389433	85.41063309	0.000487272	0.339615077	0.043137256	0	508.3055	988.667	640.6369	1.1377	3.3624	1875	1.481800835	0.00342296	57.70353557	0.133295167
32.13158413	×ÔÉí³µÁ¾	Road 1	480.8345986	85.42820435	0.000483878	0.339994669	0.043137256	0	508.8757	988.6719	640.6077	1.1431	3.357	1876	1.742396174	0.004024935	57.73258684	0.133362276
32.14817849	×ÔÉí³µÁ¾	Road 1	481.2284309	85.4384285	0.000474906	0.339955211	0.043137256	0	509.2084	988.6748	640.5907	1.1462	3.3539	1877	1.419411718	0.003278841	57.75614108	0.133416686
32.16489235	×ÔÉí³µÁ¾	Road 1	481.6251502	85.44939423	0.000462203	0.339914799	0.043137256	0	509.5648	988.6787	640.5724	1.1487	3.3514	1878	1.449062982	0.003347335	57.78036051	0.133472633
32.18159302	×ÔÉí³µÁ¾	Road 1	482.0216307	85.46546173	0.000447047	0.339845002	0.043137256	0	510.0877	988.6836	640.5457	1.1532	3.3468	1879	1.675253355	0.003869835	57.80833836	0.133537262
32.19817968	×ÔÉí³µÁ¾	Road 1	482.4154526	85.47580261	0.000433274	0.339127153	0.043137256	0	510.4206	988.6865	640.5286	1.1564	3.3438	1880	1.425310487	0.003292467	57.83197951	0.133591873
32.21486532	×ÔÉí³µÁ¾	Road 1	482.8116716	85.48601303	0.000419786	0.339526713	0.043137256	0	510.7534	988.6895	640.5116	1.1595	3.3407	1881	1.416937529	0.003273126	57.85562201	0.133646487
32.23160337	×ÔÉí³µÁ¾	Road 1	483.2092095	85.50197067	0.000404074	0.339257598	0.043137256	0	511.2765	988.6943	640.4849	1.1641	3.3361	1882	1.669404015	0.003856323	57.88356458	0.133711034
32.2481981	×ÔÉí³µÁ¾	Road 1	483.603391	85.51228409	0.000390225	0.339427024	0.043137256	0	511.6095	988.6973	640.4678	1.1672	3.333	1883	1.424343954	0.003290235	57.90720119	0.133765635
32.26492589	×ÔÉí³µÁ¾	Road 1	484.0007801	85.52239838	0.000377651	0.339627266	0.043137256	0	511.9425	988.7002	640.4508	1.1703	3.3299	1884	1.412026487	0.003261781	57.93082127	0.133820197
32.28155508	×ÔÉí³µÁ¾	Road 1	484.3959013	85.53854141	0.00036535	0.339327276	0.043137256	0	512.4658	988.7051	640.424	1.174	3.3254	1885	1.682843032	0.003887367	57.95880558	0.133884841
32.29829313	×ÔÉí³µÁ¾	Road 1	484.7936562	85.54864883	0.000356072	0.339068472	0.043137256	0	512.7989	988.708	640.407	1.1771	3.3223	1886	1.411790484	0.003261236	57.9824362	0.133939428
32.31484864	×ÔÉí³µÁ¾	Road 1	485.1871168	85.55811081	0.00034831	0.339485049	0.043137256	0	513.1083	988.71	640.3911	1.1808	3.3186	1887	1.388013028	0.00320631	58.00541547	0.13399251
32.331568	×ÔÉí³µÁ¾	Road 1	485.5845256	85.56977005	0.000341555	0.339434773	0.043137256	0	513.489	988.7139	640.3716	1.1838	3.3157	1888	1.481191966	0.003421553	58.03018005	0.134049716
32.34822834	×ÔÉí³µÁ¾	Road 1	485.9805856	85.58141556	0.000336215	0.338945091	0.043137256	0	513.8699	988.7168	640.3521	1.1878	3.3117	1889	1.482569991	0.003424737	58.05488017	0.134106773
32.36492791	×ÔÉí³µÁ¾	Road 1	486.3776558	85.59820404	0.000333126	0.339764923	0.050980393	0	514.4174	988.7217	640.3241	1.1928	3.3067	1890	1.709367212	0.003948638	58.08342586	0.134172714
32.38164873	×ÔÉí³µÁ¾	Road 1	486.7752721	85.60694504	0.000331808	0.339065462	0.050980393	0	514.6078	988.7236	640.3143	1.1943	3.3052	1891	1.352557575	0.003124408	58.10604174	0.134224956
32.39825299	×ÔÉí³µÁ¾	Road 1	487.1701739	85.61937332	0.000331808	0.340124875	0.050980393	0	515.1078	988.7285	640.2888	1.1985	3.3011	1892	1.51971853	0.00351055	58.13127554	0.134283247
32.41490857	×ÔÉí³µÁ¾	Road 1	487.5663436	85.62963867	0.000331808	0.340973884	0.05882353	0	515.4413	988.7314	640.2717	1.2017	3.298	1893	1.422071635	0.003284985	58.15496097	0.13433796
32.4315088	×ÔÉí³µÁ¾	Road 1	487.961255	85.64225235	0.000331808	0.341577798	0.05882353	0	515.8462	988.7354	640.251	1.2051	3.2946	1894	1.528443583	0.003530705	58.18033348	0.13439657
32.4482113	×ÔÉí³µÁ¾	Road 1	488.3586605	85.65544281	0.000331808	0.342646062	0.05882353	0	516.275	988.7383	640.229	1.21	3.2897	1895	1.55074744	0.003582227	58.20623484	0.134456402
32.46490976	×ÔÉí³µÁ¾	Road 1	488.7560217	85.6665802	0.000331808	0.343484998	0.05882353	0	516.6323	988.7422	640.2107	1.2126	3.2871	1896	1.460041056	0.003372695	58.23061528	0.134512721
32.48160456	×ÔÉí³µÁ¾	Road 1	489.1533718	85.68297729	0.000331808	0.344314039	0.06666667	0	517.1566	988.7471	640.1838	1.2172	3.2825	1897	1.693619525	0.003912261	58.25888992	0.134578036
32.49825391	×ÔÉí³µÁ¾	Road 1	489.5496919	85.69420395	0.000331808	0.345592469	0.06666667	0	517.5141	988.75	640.1655	1.2208	3.2789	1898	1.465842199	0.003386095	58.28329523	0.134634412
32.51494834	×ÔÉí³µÁ¾	Road 1	489.9471588	85.71005173	0.000331808	0.347300321	0.06666667	0	518.0146	988.7539	640.14	1.226	3.2738	1899	1.669708213	0.003857026	58.31117007	0.134698803
32.53153648	×ÔÉí³µÁ¾	Road 1	490.3421468	85.72132645	0.000330931	0.347979903	0.06666667	0	518.3723	988.7578	640.1217	1.2285	3.2712	1900	1.470200699	0.003396164	58.33555795	0.134755139
32.54819205	×ÔÉí³µÁ¾	Road 1	490.738787	85.73132401	0.000330931	0.348558813	0.06666667	0	518.6822	988.7598	640.1058	1.2322	3.2675	1901	1.411493391	0.00326055	58.35906719	0.134809445
32.56482637	×ÔÉí³µÁ¾	Road 1	491.1349953	85.74742584	0.000330931	0.348539233	0.06666667	0	519.0161	988.7627	640.0887	1.2354	3.2643	1902	1.684163202	0.003890417	58.3870821	0.13487416
32.58158239	×ÔÉí³µÁ¾	Road 1	491.5341552	85.75878983	0.000330931	0.349767298	0.06666667	0	519.5408	988.7676	640.0619	1.24	3.2597	1903	1.469613103	0.003394806	58.41170695	0.134931043
32.59825996	×ÔÉí³µÁ¾	Road 1	491.9314962	85.76954269	0.000330931	0.350615859	0.06666667	0	519.8747	988.7705	640.0447	1.2431	3.2566	1904	1.444967157	0.003337874	58.4358055	0.134986711
32.61486239	×ÔÉí³µÁ¾	Road 1	492.3271036	85.78183365	0.000330931	0.349937171	0.074509807	0	520.2087	988.7734	640.0276	1.2463	3.2534	1905	1.51596316	0.003501875	58.46097417	0.13504485
32.63159384	×ÔÉí³µÁ¾	Road 1	492.7258572	85.79725571	0.000330931	0.351415306	0.074509807	0	520.7336	988.7783	640.0008	1.2509	3.2488	1906	1.650682127	0.003813076	58.48859248	0.135108649
32.64818344	×ÔÉí³µÁ¾	Road 1	493.1212801	85.80811844	0.000330931	0.352723718	0.074509807	0	521.0677	988.7813	639.9837	1.2541	3.2456	1907	1.452927633	0.003356263	58.51269597	0.135164328
32.66483865	×ÔÉí³µÁ¾	Road 1	493.5183426	85.8245018	0.000330931	0.353981704	0.074509807	0	521.569	988.7861	639.958	1.2583	3.2414	1908	1.697041414	0.003920166	58.54096055	0.135229619
32.6815965	×ÔÉí³µÁ¾	Road 1	493.9178807	85.83065414	0.000330493	0.354641289	0.082352944	0	521.7599	988.7871	639.9482	1.2608	3.2389	1909	1.239880906	0.002864125	58.56173829	0.135277615
32.69835874	×ÔÉí³µÁ¾	Road 1	494.3176013	85.8473259	0.000329618	0.355390429	0.082352944	0	522.2613	988.792	639.9226	1.265	3.2347	1910	1.705515049	0.00393974	58.59032655	0.135343654
32.71484937	×ÔÉí³µÁ¾	Road 1	494.7109202	85.86380539	0.00032831	0.357815534	0.082352944	0	522.7628	988.7959	639.8969	1.2702	3.2295	1911	1.70929024	0.00394846	58.61851382	0.135408767
32.73157606	×ÔÉí³µÁ¾	Road 1	495.1099259	85.87596588	0.000324836	0.358426064	0.082352944	0	523.121	988.7998	639.8786	1.2728	3.2269	1912	1.507428635	0.00348216	58.64372811	0.135467012
32.74818875	×ÔÉí³µÁ¾	Road 1	495.5062624	85.88682861	0.000321817	0.358844757	0.090196081	0	523.4554	988.8027	639.8615	1.276	3.2237	1913	1.453309672	0.003357145	58.6678715	0.135522783
32.76489748	×ÔÉí³µÁ¾	Road 1	495.9049692	85.90386429	0.000316685	0.360932529	0.090196081	0	523.9571	988.8066	639.8358	1.2812	3.2185	1914	1.724971604	0.003984684	58.69669358	0.135589362
32.78150578	×ÔÉí³µÁ¾	Road 1	496.301339	85.91680756	0.000311188	0.362281829	0.098039217	0	524.3394	988.8105	639.8162	1.2842	3.2155	1915	1.54684045	0.003573201	58.72238396	0.135648707
32.79828232	×ÔÉí³µÁ¾	Road 1	496.701777	85.92810974	0.000304924	0.36459747	0.098039217	0	524.674	988.8135	639.7991	1.2874	3.2124	1916	1.468571205	0.003392399	58.7470215	0.13570562
32.81485029	×ÔÉí³µÁ¾	Road 1	497.0973164	85.94546814	0.000297519	0.365707576	0.105882354	0	525.1759	988.8174	639.7734	1.2926	3.2071	1917	1.746559456	0.004034552	58.77595845	0.135772464
32.8316085	×ÔÉí³µÁ¾	Road 1	497.4974517	85.95707932	0.000288232	0.369127452	0.113725491	0	525.5106	988.8203	639.7562	1.2957	3.204	1918	1.483207216	0.003426209	58.80081435	0.135829881
32.84818124	×ÔÉí³µÁ¾	Road 1	497.8932124	85.96880722	0.00027836	0.37004146	0.113725491	0	525.8453	988.8232	639.7391	1.2989	3.2008	1919	1.494361459	0.003451975	58.82558001	0.13588709
32.86492772	×ÔÉí³µÁ¾	Road 1	498.2932042	85.98642654	0.000268716	0.372778445	0.121568628	0	526.3475	988.8281	639.7135	1.3031	3.1966	1920	1.75052634	0.004043716	58.85489518	0.135954808
32.8815987	×ÔÉí³µÁ¾	Road 1	498.6914472	85.99827805	0.00025633	0.372817308	0.121568628	0	526.6824	988.8311	639.6963	1.3063	3.1934	1921	1.49718115	0.003458488	58.87985464	0.136012464
32.89819599	×ÔÉí³µÁ¾	Road 1	499.088013	86.01622696	0.000245765	0.375394523	0.121568628	0	527.1847	988.835	639.6706	1.3115	3.1882	1922	1.772816807	0.004095207	58.90927861	0.136080434
32.91483214	×ÔÉí³µÁ¾	Road 1	499.4855628	86.02826385	0.000234448	0.37708196	0.121568628	0	527.5197	988.8379	639.6534	1.3146	3.1851	1923	1.506988779	0.003481144	58.9343491	0.136138346
32.9482573	×ÔÉí³µÁ¾	Road 1	500.2844839	86.04645309	0.000220798	0.37793085	0.121568628	0	528.0222	988.8428	639.6277	1.3189	3.1808	1924	1.373864458	0.003173627	58.98027073	0.136244425
32.96484543	×ÔÉí³µÁ¾	Road 1	500.6810904	86.07257996	0.000210267	0.379593343	0.121568628	0	528.7402	988.8486	639.5909	1.3261	3.1736	1925	2.140843864	0.004945349	59.01578333	0.13632646
32.9815417	×ÔÉí³µÁ¾	Road 1	501.0803431	86.08570862	0.000185417	0.380237967	0.129411772	0	529.0994	988.8516	639.5725	1.3297	3.1701	1926	1.554496529	0.003590887	59.04173762	0.136386414
32.9983417	×ÔÉí³µÁ¾	Road 1	501.4821335	86.09792404	0.000174333	0.38193199	0.129411772	0	529.4346	988.8545	639.5554	1.3328	3.1669	1927	1.510621668	0.003489536	59.06711607	0.136445038
33.01567724	×ÔÉí³µÁ¾	Road 1	501.8968217	86.11658707	0.000163974	0.384194106	0.129411772	0	529.9376	988.8594	639.5297	1.3371	3.1626	1928	1.770915411	0.004090815	59.09781584	0.136515955
33.03153079	×ÔÉí³µÁ¾	Road 1	502.2761176	86.12992859	0.000151157	0.384218246	0.129411772	0	530.2969	988.8623	639.5112	1.3406	3.159	1929	1.596242451	0.00368732	59.12312196	0.136574412
33.04815265	×ÔÉí³µÁ¾	Road 1	502.6738606	86.14408722	0.000140507	0.385686845	0.137254909	0	530.6802	988.8662	639.4916	1.3437	3.156	1930	1.604090294	0.003705449	59.14978492	0.136636003
33.06488007	×ÔÉí³µÁ¾	Road 1	503.0742176	86.1630249	0.000129663	0.386739969	0.137254909	0	531.1833	988.8701	639.4659	1.3488	3.1507	1931	1.813072333	0.004188197	59.18011294	0.136706061
33.08158807	×ÔÉí³µÁ¾	Road 1	503.4741683	86.17565918	0.000117625	0.389267743	0.137254909	0	531.5189	988.873	639.4487	1.352	3.1476	1932	1.533363318	0.003542069	59.20573237	0.136765242
33.09814651	×ÔÉí³µÁ¾	Road 1	503.8705937	86.18754501	0.000108217	0.389057517	0.137254909	0	531.8305	988.876	639.4328	1.3547	3.1449	1933	1.50495845	0.003476454	59.23065214	0.136822806
33.11484424	×ÔÉí³µÁ¾	Road 1	504.2704419	86.20651703	9.87E-05	0.390515149	0.137254909	0	532.334	988.8799	639.407	1.3599	3.1396	1934	1.816867161	0.004196963	59.2609897	0.136892886
33.13148552	×ÔÉí³µÁ¾	Road 1	504.6689803	86.21562195	8.91E-05	0.390066177	0.137254909	0	532.5737	988.8828	639.3948	1.3613	3.1382	1935	1.378195221	0.003183631	59.28392464	0.136945866
33.14823751	×ÔÉí³µÁ¾	Road 1	505.070272	86.23756027	8.11E-05	0.392553508	0.137254909	0	533.1494	988.8877	639.3653	1.3668	3.1326	1936	1.946605463	0.004496659	59.31653414	0.137021194
33.16489382	×ÔÉí³µÁ¾	Road 1	505.4693317	86.25048294	7.40E-05	0.391903371	0.137254909	0	533.4852	988.8906	639.3481	1.3699	3.1294	1937	1.549086755	0.00357839	59.34233621	0.137080797
33.18151274	×ÔÉí³µÁ¾	Road 1	505.8675545	86.26323395	6.74E-05	0.392937869	0.137254909	0	533.821	988.8936	639.3309	1.3731	3.1263	1938	1.542873374	0.003564037	59.3679771	0.137140027
33.19821011	×ÔÉí³µÁ¾	Road 1	506.2677252	86.27794189	6.22E-05	0.392463386	0.137254909	0	534.205	988.8965	639.3112	1.3771	3.1222	1939	1.627770093	0.003760149	59.39515657	0.137202812
33.21487998	×ÔÉí³µÁ¾	Road 1	506.6673312	86.29829407	5.75E-05	0.393442541	0.137254909	0	534.7329	988.9014	639.2842	1.3817	3.1175	1940	1.881630406	0.004346566	59.42652312	0.137275268
33.23149121	×ÔÉí³µÁ¾	Road 1	507.0655952	86.31214371	5.32E-05	0.394281507	0.145098045	0	535.093	988.9043	639.2657	1.3853	3.1139	1941	1.593168478	0.003680219	59.4529876	0.137336401
33.24814898	×ÔÉí³µÁ¾	Road 1	507.4650347	86.32497025	5.00E-05	0.39404133	0.145098045	0	535.4291	988.9072	639.2485	1.3884	3.1107	1942	1.545810027	0.003570821	59.47873736	0.137395883
33.26495192	×ÔÉí³µÁ¾	Road 1	507.8680459	86.34446411	4.76E-05	0.395729005	0.145098045	0	535.9333	988.9121	639.2228	1.3927	3.1065	1943	1.837156296	0.004243831	59.50960697	0.137467192
33.28153528	×ÔÉí³µÁ¾	Road 1	508.2658505	86.35740051	4.59E-05	0.396797657	0.145098045	0	536.2696	988.915	639.2056	1.3958	3.1033	1944	1.553799805	0.003589278	59.5353742	0.137526714
33.29816484	×ÔÉí³µÁ¾	Road 1	508.6648238	86.37057037	4.43E-05	0.396507949	0.145098045	0	536.6059	988.918	639.1884	1.399	3.1001	1945	1.562851166	0.003610186	59.56136372	0.13758675
33.3148589	×ÔÉí³µÁ¾	Road 1	509.0654403	86.39113541	4.36E-05	0.397715986	0.145098045	0	537.1345	988.9219	639.1613	1.4046	3.0945	1946	1.891528535	0.004369431	59.59294102	0.137659694
33.33154527	×ÔÉí³µÁ¾	Road 1	509.4659333	86.4043396	4.31E-05	0.397456259	0.145098045	0	537.4709	988.9248	639.144	1.4078	3.0914	1947	1.562867663	0.003610224	59.61901961	0.137719935
33.34819389	×ÔÉí³µÁ¾	Road 1	509.8656106	86.42392273	4.29E-05	0.398864448	0.145098045	0	537.9756	988.9297	639.1182	1.412	3.0871	1948	1.850605256	0.004274898	59.64982962	0.137791106
33.36480181	×ÔÉí³µÁ¾	Road 1	510.264372	86.43709259	4.29E-05	0.398894399	0.152941182	0	538.3121	988.9326	639.101	1.4151	3.084	1949	1.564594139	0.003614212	59.67581429	0.137851131
33.38149698	×ÔÉí³µÁ¾	Road 1	510.6652891	86.45026245	4.29E-05	0.398842543	0.152941182	0	538.6487	988.9355	639.0837	1.4183	3.0808	1950	1.561691267	0.003607507	59.70188698	0.137911359
33.39816575	×ÔÉí³µÁ¾	Road 1	511.0656642	86.47009964	4.29E-05	0.400520861	0.152941182	0	539.1537	988.9395	639.0579	1.4235	3.0756	1951	1.861757842	0.004300661	59.7329202	0.137983046
33.41489244	×ÔÉí³µÁ¾	Road 1	511.4674922	86.48338623	4.29E-05	0.401350856	0.152941182	0	539.4905	988.9424	639.0406	1.4267	3.0724	1952	1.566278618	0.003618104	59.75911886	0.138043565
33.43147068	×ÔÉí³µÁ¾	Road 1	511.8658151	86.49668655	4.23E-05	0.402148843	0.152941182	0	539.8273	988.9453	639.0234	1.4298	3.0693	1953	1.572409152	0.003632265	59.78518663	0.138103781
33.44821166	×ÔÉí³µÁ¾	Road 1	512.2681463	86.51773224	4.17E-05	0.401859134	0.152941182	0	540.3566	988.9502	638.9963	1.4345	3.0646	1954	1.912741476	0.004418433	59.81720781	0.13817775
33.46487531	×ÔÉí³µÁ¾	Road 1	512.6686798	86.53095016	4.04E-05	0.402048975	0.152941182	0	540.6935	988.9531	638.9791	1.4377	3.0614	1955	1.566141409	0.003617787	59.84330543	0.138238036
33.4822409	×ÔÉí³µÁ¾	Road 1	513.0861825	86.55098648	3.87E-05	0.402879387	0.152941182	0	541.199	988.958	638.9532	1.442	3.0572	1956	1.836079187	0.004241343	59.87519004	0.138311689
33.49820076	×ÔÉí³µÁ¾	Road 1	513.4699477	86.56437607	3.68E-05	0.403678387	0.152941182	0	541.536	988.9609	638.936	1.4452	3.054	1957	1.600840851	0.003697942	59.90073923	0.138370708
33.51485817	×ÔÉí³µÁ¾	Road 1	513.870553	86.57882309	3.43E-05	0.402907819	0.152941182	0	541.8972	988.9639	638.9175	1.4489	3.0504	1958	1.622263209	0.003747428	59.92776193	0.13843313
33.53148259	×ÔÉí³µÁ¾	Road 1	514.2704227	86.5913475	3.17E-05	0.40309909	0.152941182	0	542.2103	988.9668	638.9015	1.4516	3.0477	1959	1.537212871	0.003550962	59.95331721	0.138492163
33.54811801	×ÔÉí³µÁ¾	Road 1	514.6706577	86.61313477	2.90E-05	0.403916538	0.152941182	0	542.7642	988.9717	638.8731	1.4568	3.0426	1960	1.953849585	0.004513393	59.98582031	0.138567245
33.56486119	×ÔÉí³µÁ¾	Road 1	515.0735478	86.62655869	2.61E-05	0.404307544	0.160784319	0	543.1015	988.9746	638.8558	1.46	3.0394	1961	1.573928545	0.003635775	60.01217289	0.138628119
33.58168172	×ÔÉí³µÁ¾	Road 1	515.4783888	86.64575729	2.31E-05	0.404256076	0.160784319	0	543.4388	988.9775	638.8386	1.4632	3.0363	1962	1.828470964	0.004223768	60.04292874	0.138699165
33.59812397	×ÔÉí³µÁ¾	Road 1	515.8741646	86.65442276	1.97E-05	0.405514479	0.160784319	0	543.8004	988.9805	638.8201	1.4668	3.0327	1963	1.368629586	0.003161534	60.06543208	0.138751148
33.61481143	×ÔÉí³µÁ¾	Road 1	516.2759462	86.67663574	1.71E-05	0.406305045	0.160784319	0	544.3547	988.9854	638.7917	1.472	3.0275	1964	1.971107213	0.004553258	60.09832486	0.13882713
33.63150294	×ÔÉí³µÁ¾	Road 1	516.6778921	86.69115143	1.43E-05	0.406692982	0.160784319	0	544.7164	988.9883	638.7732	1.4747	3.0239	1965	1.625733292	0.003755444	60.12546079	0.138889814
33.64820727	×ÔÉí³µÁ¾	Road 1	517.0802144	86.70566711	1.16E-05	0.406634599	0.160784319	0	545.0781	988.9912	638.7546	1.4783	3.0203	1966	1.625454851	0.003754801	60.15261293	0.138952536
33.66482326	×ÔÉí³µÁ¾	Road 1	517.4805029	86.72602615	9.40E-06	0.407433599	0.160784319	0	545.5846	988.9961	638.7288	1.4826	3.016	1967	1.892746864	0.004372245	60.18406279	0.139025185
33.68151402	×ÔÉí³µÁ¾	Road 1	517.882656	86.7396286	7.36E-06	0.407843053	0.160784319	0	545.9223	988.999	638.7114	1.4858	3.0129	1968	1.585495342	0.003662494	60.21052593	0.139086315
33.69820076	×ÔÉí³µÁ¾	Road 1	518.2847795	86.75420609	5.73E-06	0.407773137	0.160784319	0	546.2842	989.002	638.6929	1.4895	3.0092	1969	1.629659873	0.003764514	60.23771963	0.139149132
33.7148853	×ÔÉí³µÁ¾	Road 1	518.686944	86.77450333	4.36E-06	0.40791142	0.160784319	0	546.791	989.0068	638.667	1.4938	3.0048	1970	1.887085849	0.004359168	60.26920478	0.139221863
33.74816859	×ÔÉí³µÁ¾	Road 1	519.4893955	86.79504089	3.15E-06	0.408480734	0.160784319	0	547.2979	989.0107	638.6411	1.4991	2.9995	1971	1.437857446	0.003321451	60.31706142	0.139332412
33.76481904	×ÔÉí³µÁ¾	Road 1	519.8909548	86.82131882	2.35E-06	0.407932937	0.160784319	0	547.9498	989.0166	638.6077	1.5051	2.9934	1972	2.159241834	0.004987849	60.35301376	0.139415462
33.78156223	×ÔÉí³µÁ¾	Road 1	520.2948187	86.83593063	1.18E-06	0.408761919	0.160784319	0	548.312	989.0195	638.5891	1.5087	2.9897	1973	1.630240927	0.003765857	60.38030919	0.139478514
33.79816429	×ÔÉí³µÁ¾	Road 1	520.6953724	86.85627594	8.35E-07	0.408911705	0.168627456	0	548.8193	989.0244	638.5632	1.5131	2.9854	1974	1.895289891	0.00437812	60.41177491	0.1395512
33.81486532	×ÔÉí³µÁ¾	Road 1	521.0983783	86.87015991	5.88E-07	0.409259766	0.168627456	0	549.1575	989.0273	638.5459	1.5163	2.9823	1975	1.599706788	0.003695323	60.43849166	0.139612916
33.83149157	×ÔÉí³µÁ¾	Road 1	521.4996426	86.88376236	4.15E-07	0.410328329	0.168627456	0	549.4958	989.0303	638.5286	1.5195	2.9791	1976	1.590005707	0.003672913	60.4649275	0.139673983
33.84813689	×ÔÉí³µÁ¾	Road 1	521.9014669	86.90537109	2.84E-07	0.411127359	0.168627456	0	550.0275	989.0352	638.5013	1.5243	2.9745	1977	1.950792249	0.00450633	60.49739905	0.139748992
33.8647899	×ÔÉí³µÁ¾	Road 1	522.3035405	86.91911774	2.12E-07	0.411068976	0.168627456	0	550.3659	989.0381	638.484	1.5276	2.9713	1978	1.596046357	0.003686867	60.52397803	0.139810389
33.88266098	×ÔÉí³µÁ¾	Road 1	522.7351015	86.93484879	1.56E-07	0.411448449	0.168627456	0	550.7044	989.041	638.4667	1.5308	2.9681	1979	1.637423415	0.003782448	60.55324055	0.139877986
33.8981894	×ÔÉí³µÁ¾	Road 1	523.1101713	86.95357361	1.20E-07	0.411846459	0.168627456	0	551.2122	989.0449	638.4407	1.5362	2.9626	1980	1.882338947	0.004348203	60.5824703	0.139945506
33.91479402	×ÔÉí³µÁ¾	Road 1	523.5113039	86.96836395	8.76E-08	0.411748558	0.168627456	0	551.575	989.0479	638.4221	1.5399	2.9589	1981	1.645821902	0.003801849	60.60979856	0.140008635
33.96483883	×ÔÉí³µÁ¾	Road 1	524.7208719	87.01091537	6.61E-08	0.412266403	0.168627456	0	552.6154	989.0576	638.3689	1.5491	2.9496	1982	1.61594981	0.003732844	60.69066846	0.140195444
33.98145446	×ÔÉí³µÁ¾	Road 1	525.1225522	87.02946854	4.97E-08	0.412177563	0.168627456	0	553.0753	989.0615	638.3453	1.5534	2.9451	1983	1.816615557	0.004196382	60.72085266	0.14026517
33.99818665	×ÔÉí³µÁ¾	Road 1	525.5271518	87.05130386	2.25E-08	0.412736803	0.168627456	0	553.6078	989.0664	638.3181	1.5581	2.9404	1984	1.958679785	0.00452455	60.75362566	0.140340875
34.01478578	×ÔÉí³µÁ¾	Road 1	525.9285978	87.06513977	1.65E-08	0.412675351	0.168627456	0	553.9468	989.0693	638.3007	1.5612	2.9372	1985	1.604285373	0.003705899	60.7802554	0.14040239
34.03146701	×ÔÉí³µÁ¾	Road 1	526.3321028	87.08096008	1.22E-08	0.413056374	0.168627456	0	554.3343	989.0723	638.2809	1.5653	2.9331	1986	1.690943572	0.00390608	60.80846243	0.140467548
34.0481893	×ÔÉí³µÁ¾	Road 1	526.7366698	87.09577789	8.36E-09	0.412117571	0.168627456	0	554.6976	989.0752	638.2623	1.5689	2.9295	1987	1.64431267	0.003798362	60.83595911	0.140531066
34.06483352	×ÔÉí³µÁ¾	Road 1	527.1394158	87.11049271	5.13E-09	0.413176239	0.168627456	0	555.061	989.0791	638.2437	1.5715	2.9268	1988	1.643011012	0.003795355	60.86330573	0.140594236
34.08150889	×ÔÉí³µÁ¾	Road 1	527.5429941	87.12740479	2.50E-09	0.412026227	0.168627456	0	555.473	989.082	638.2226	1.576	2.9222	1989	1.741224506	0.004022229	60.8923413	0.140661308
34.09810252	×ÔÉí³µÁ¾	Road 1	527.9446761	87.14518204	1.17E-09	0.413234681	0.168627456	0	555.9092	989.0859	638.2003	1.5799	2.9182	1990	1.784539083	0.004122285	60.92195328	0.140729712
34.11478852	×ÔÉí³µÁ¾	Road 1	528.3486948	87.1669281	4.18E-10	0.412265897	0.168627456	0	556.4425	989.0908	638.173	1.5846	2.9134	1991	1.959574892	0.004526618	60.95465076	0.140805243
34.13153244	×ÔÉí³µÁ¾	Road 1	528.7541807	87.18084641	8.67E-11	0.412417263	0.168627456	0	556.7819	989.0938	638.1556	1.5879	2.9102	1992	1.604295749	0.003705923	60.98151295	0.140867295
34.14811838	×ÔÉí³µÁ¾	Road 1	529.1559079	87.19545822	4.44E-13	0.413264632	0.168627456	0	557.1457	989.0967	638.137	1.5918	2.9065	1993	1.641983162	0.003792981	61.00874677	0.140930205
34.16482857	×ÔÉí³µÁ¾	Road 1	529.560737	87.21530228	-1.75E-11	0.412517101	0.168627456	0	557.6308	989.1016	638.1121	1.596	2.9025	1994	1.873304493	0.004327333	61.04005006	0.141002516
34.18148525	×ÔÉí³µÁ¾	Road 1	529.9643331	87.22902832	-1.80E-10	0.413136274	0.168627456	0	557.9704	989.1045	638.0947	1.5994	2.8993	1995	1.599598545	0.003695073	61.06669406	0.141064063
34.19810967	×ÔÉí³µÁ¾	Road 1	530.3672432	87.24973755	-8.06E-10	0.412615418	0.168627456	0	558.48	989.1084	638.0687	1.6047	2.894	1996	1.917776442	0.004430064	61.09857598	0.141137711
34.21478907	×ÔÉí³µÁ¾	Road 1	530.7715184	87.25676193	-1.27E-09	0.412785202	0.168627456	0	558.6498	989.1104	638.06	1.6058	2.8928	1997	1.296221156	0.002994271	61.12019618	0.141187653
[truncated: 2,245 more rows]
