# Supplementary material for: Influence of Landscape Design on Driving Behavior Based on Slope Illusion
Source: Hindawi journal article supplement (doi:10.1155/2022/6407145), 2022-01-12
Supplement: f1 [file 6407145.f1.zip › 7.txt]

CO2 emission report
0.3	0.028	0.056	0.00231
Time(s)	Vehicle Name	Road Name	Travelled Distance (m)	Speed(km/h)	Steering Wheel Angle(-1..1)	Acceleration(m/s^2)	Accelerate (0..1)	Brake (0..1)	X Pos(m)	Y Pos(m)	Z Pos(m)	Distance to the left border(m)	Distance to the right border(m)	Measurement Point Number	Gasoline Consumption(cc/sec)	Carbon Dioxide Emission(kg/sec)	Progressive Gasoline Consumption(cc)	Progressive Carbon Dioxide Emission(kg)
0	×ÔÉí³µÁ¾	Road 1	0	8.885685539	0.000148574	0.532046378	0	0	22.4037	977.1758	655.7372	3.8378	0.6916	1	0	0	0	0
0.016514088	×ÔÉí³µÁ¾	Road 1	0.040851403	8.905430031	0.000148574	0.441953719	0	0.011764706	22.4383	977.1768	655.7372	3.8375	0.6919	2	0.46117759	0.00106532	0.007615927	1.76E-05
0.051083632	×ÔÉí³µÁ¾	Road 1	0.126765445	8.946908569	0.000148574	0.420160562	0	0.011764706	22.5276	977.1787	655.7372	3.8371	0.6923	3	0.462143782	0.001067552	0.023592027	5.45E-05
0.116277109	×ÔÉí³µÁ¾	Road 1	0.290251359	9.027732754	0.000148574	0.423369884	0	0.011764706	22.6998	977.1807	655.7371	3.8383	0.6911	4	0.466505534	0.001077628	0.054005145	0.000124752
0.182864966	×ÔÉí³µÁ¾	Road 1	0.458589804	9.101034737	0.000148574	0.419959337	0	0.011764706	22.8584	977.1836	655.7372	3.8383	0.6912	5	0.457018527	0.001055713	0.084437029	0.00019505
0.199457497	×ÔÉí³µÁ¾	Road 1	0.500616635	9.11835537	0.000148574	0.419109285	0	0.011764706	22.8964	977.1846	655.7372	3.838	0.6915	6	0.453100892	0.001046663	0.09195512	0.000212416
0.216238804	×ÔÉí³µÁ¾	Road 1	0.543202125	9.135627079	0.000148574	0.418049127	0	0.011764706	22.9344	977.1855	655.7372	3.8377	0.6918	7	0.452235091	0.001044663	0.099544216	0.000229947
0.232809341	×ÔÉí³µÁ¾	Road 1	0.585379429	9.163148689	0.000148574	0.416778952	0	0.011764706	22.9954	977.1865	655.7372	3.8378	0.6916	8	0.502592392	0.001160988	0.107872442	0.000249185
0.249482881	×ÔÉí³µÁ¾	Road 1	0.627855954	9.171147251	0.000148574	0.415701956	0	0.011764706	23.0132	977.1865	655.7372	3.8382	0.6913	9	0.409335325	0.000945565	0.11469751	0.000264951
0.266172549	×ÔÉí³µÁ¾	Road 1	0.670474023	9.192816067	0.000148574	0.415071875	0	0.011764706	23.0617	977.1875	655.7372	3.8381	0.6914	10	0.474523327	0.001096149	0.122617147	0.000283246
0.2828098	×ÔÉí³µÁ¾	Road 1	0.713042293	9.21100359	0.000148574	0.414220423	0	0.011764706	23.1026	977.1875	655.7371	3.8388	0.6907	11	0.458573803	0.001059305	0.130246555	0.00030087
0.299519995	×ÔÉí³µÁ¾	Road 1	0.755886515	9.230245113	0.000148574	0.412286997	0	0.011764706	23.1461	977.1885	655.7371	3.8386	0.6909	12	0.463546122	0.001070792	0.137992501	0.000318763
0.316167875	×ÔÉí³µÁ¾	Road 1	0.798669793	9.251616096	0.000148574	0.410156608	0	0.011764706	23.1897	977.1895	655.7371	3.8384	0.691	13	0.474473634	0.001096034	0.145891481	0.000337009
0.332800361	×ÔÉí³µÁ¾	Road 1	0.841480733	9.266166973	0.000148574	0.409116417	0	0.011764706	23.2283	977.1904	655.7372	3.8382	0.6913	14	0.442071153	0.001021184	0.153244223	0.000353994
0.349488196	×ÔÉí³µÁ¾	Road 1	0.884563035	9.293972683	0.000148574	0.406566113	0	0.011764706	23.2927	977.1914	655.7371	3.8384	0.6911	15	0.505914694	0.001168663	0.161686844	0.000373497
0.366112617	×ÔÉí³µÁ¾	Road 1	0.927553141	9.309459972	0.000148574	0.405295968	0	0.011764706	23.3289	977.1914	655.7371	3.839	0.6905	16	0.447293663	0.001033248	0.169122842	0.000390674
0.382810349	×ÔÉí³µÁ¾	Road 1	0.970814562	9.327081871	0.000148574	0.404008985	0	0.011764706	23.3703	977.1924	655.7371	3.8388	0.6907	17	0.457529221	0.001056892	0.176762543	0.000408321
0.399519445	×ÔÉí³µÁ¾	Road 1	1.014176693	9.342436981	0.000148574	0.402735651	0	0.011764706	23.4066	977.1934	655.7371	3.8385	0.691	18	0.446797179	0.001032101	0.18422812	0.000425567
0.416179422	×ÔÉí³µÁ¾	Road 1	1.057492247	9.359916401	0.000148574	0.401455313	0	0.011764706	23.4482	977.1934	655.7371	3.8392	0.6903	19	0.457586863	0.001057026	0.191851506	0.000443177
0.433160502	×ÔÉí³µÁ¾	Road 1	1.101729856	9.378401756	0.000148574	0.399745226	0	0.011764706	23.4924	977.1943	655.7371	3.8391	0.6905	20	0.46108375	0.001065103	0.199681206	0.000461264
0.449534565	×ÔÉí³µÁ¾	Road 1	1.144469731	9.396784973	0.000148574	0.398038149	0	0.011764706	23.5368	977.1953	655.7371	3.8389	0.6906	21	0.464168059	0.001072228	0.207281523	0.00047882
0.466126729	×ÔÉí³µÁ¾	Road 1	1.187858221	9.413995743	0.000148574	0.396774799	0	0.011764706	23.5786	977.1963	655.7371	3.8387	0.6909	22	0.457531523	0.001056898	0.214872962	0.000496357
0.482860384	×ÔÉí³µÁ¾	Road 1	1.231696345	9.431128407	0.000148574	0.395484477	0	0.011764706	23.6204	977.1963	655.7371	3.8394	0.6901	23	0.456724433	0.001055033	0.222515631	0.000514011
0.499474542	×ÔÉí³µÁ¾	Road 1	1.275305015	9.449242973	0.000148574	0.393774211	0	0.011764706	23.665	977.1973	655.7371	3.8393	0.6903	24	0.462443546	0.001068245	0.230198741	0.000531759
0.516178506	×ÔÉí³µÁ¾	Road 1	1.319233056	9.467270851	0.000148574	0.392504066	0	0.011764706	23.7097	977.1982	655.7371	3.8391	0.6904	25	0.461850701	0.001066875	0.237913478	0.00054958
0.532835917	×ÔÉí³µÁ¾	Road 1	1.363121724	9.485219765	0.000148574	0.391223907	0	0.011764706	23.7544	977.1992	655.7371	3.8389	0.6906	26	0.462016873	0.001067259	0.245609483	0.000567358
0.549527417	×ÔÉí³µÁ¾	Road 1	1.407212176	9.509368229	0.000148574	0.389096886	0	0.011764706	23.8151	977.2002	655.7371	3.8391	0.6905	27	0.492704483	0.001138147	0.25383346	0.000586355
0.566133511	×ÔÉí³µÁ¾	Road 1	1.451144486	9.52399292	0.000148574	0.388636798	0	0.011764706	23.8521	977.2002	655.7371	3.8397	0.6898	28	0.446505376	0.001031427	0.26124817	0.000603483
0.582882561	×ÔÉí³µÁ¾	Road 1	1.495556597	9.545830822	0.000148574	0.386934757	0	0.011764706	23.9077	977.2012	655.7371	3.8398	0.6898	29	0.4816815	0.001112684	0.269315878	0.00062212
0.599537773	×ÔÉí³µÁ¾	Road 1	1.539753411	9.553077507	0.000148574	0.386084557	0	0.011764706	23.9263	977.2021	655.7371	3.8391	0.6904	30	0.410208852	0.000947582	0.276147993	0.000637902
0.616106477	×ÔÉí³µÁ¾	Road 1	1.583806126	9.571646118	0.000148574	0.384374291	0	0.011764706	23.9741	977.2021	655.7371	3.84	0.6896	31	0.46705852	0.001078905	0.283886548	0.000655778
0.632783316	×ÔÉí³µÁ¾	Road 1	1.628246159	9.593192196	0.000148574	0.382667392	0	0.011764706	24.03	977.2031	655.7371	3.84	0.6895	32	0.481603592	0.001112504	0.291918173	0.000674331
0.649551427	×ÔÉí³µÁ¾	Road 1	1.672995996	9.607487297	0.000148574	0.381813973	0	0.011764706	24.0673	977.2041	655.7371	3.8397	0.6898	33	0.445454748	0.001029	0.299387608	0.000691585
0.666159353	×ÔÉí³µÁ¾	Road 1	1.717426177	9.630862427	0.000148574	0.380103707	0	0.011764706	24.1287	977.2051	655.7371	3.8399	0.6897	34	0.491907679	0.001136307	0.307557174	0.000710457
0.682818597	×ÔÉí³µÁ¾	Road 1	1.762059177	9.645023632	0.000148574	0.37924543	0	0.011764706	24.1662	977.2061	655.7371	3.8396	0.69	35	0.445818326	0.00102984	0.31498417	0.000727613
0.699495802	×ÔÉí³µÁ¾	Road 1	1.80680558	9.659115314	0.000148574	0.377545178	0	0.011764706	24.2038	977.2061	655.7371	3.8403	0.6893	36	0.445607611	0.001029354	0.32241566	0.00074478
0.716141483	×ÔÉí³µÁ¾	Road 1	1.851532288	9.673148632	0.000148574	0.376685113	0	0.011764706	24.2413	977.207	655.7371	3.84	0.6896	37	0.445660221	0.001029475	0.329833978	0.000761916
0.732821254	×ÔÉí³µÁ¾	Road 1	1.896424562	9.68911314	0.000148574	0.37498486	0	0.011764706	24.2844	977.208	655.7371	3.8398	0.6898	38	0.455436174	0.001052058	0.337430549	0.000779465
0.749434679	×ÔÉí³µÁ¾	Road 1	1.94121619	9.705997753	0.000148574	0.374121457	0	0.011764706	24.3302	977.209	655.7371	3.8396	0.69	39	0.460665133	0.001064136	0.345083774	0.000797144
0.766156237	×ÔÉí³µÁ¾	Road 1	1.986377407	9.722800827	0.000148574	0.372421354	0	0.011764706	24.376	977.209	655.7371	3.8405	0.6891	40	0.459982636	0.00106256	0.352775401	0.000814911
0.782772228	×ÔÉí³µÁ¾	Road 1	2.031326183	9.738546467	0.000148574	0.37156114	0	0.011764706	24.4193	977.21	655.7371	3.8403	0.6893	41	0.455431715	0.001052047	0.36034285	0.000832392
0.799523477	×ÔÉí³µÁ¾	Road 1	2.076718376	9.755206203	0.000148574	0.370280981	0	0.011764706	24.4653	977.2109	655.7371	3.8401	0.6895	42	0.459645926	0.001061782	0.368042493	0.000850178
0.816168059	×ÔÉí³µÁ¾	Road 1	2.121898211	9.771792984	0.000148574	0.368994027	0	0.011764706	24.5114	977.2119	655.7371	3.84	0.6896	43	0.460085747	0.001062798	0.375700428	0.000867868
0.832782216	×ÔÉí³µÁ¾	Road 1	2.167085032	9.791201019	0.000148574	0.367720664	0	0.011764706	24.5549	977.2119	655.7371	3.8408	0.6888	44	0.47490026	0.00109702	0.383590496	0.000886094
0.849525401	×ÔÉí³µÁ¾	Road 1	2.212699057	9.807601547	0.000148574	0.366010398	0	0.011764706	24.612	977.2129	655.7371	3.8408	0.6888	45	0.459234386	0.001060831	0.391279542	0.000903856
0.866100704	×ÔÉí³µÁ¾	Road 1	2.257917623	9.821047783	0.000148574	0.365150183	0	0.011764706	24.6502	977.2139	655.7371	3.8406	0.6891	46	0.44518977	0.001028388	0.398658697	0.000920902
0.882861117	×ÔÉí³µÁ¾	Road 1	2.303734603	9.841113281	0.000148574	0.363860041	0	0.011764706	24.6911	977.2148	655.7371	3.8403	0.6893	47	0.478255703	0.001104771	0.406674461	0.000939418
0.899477841	×ÔÉí³µÁ¾	Road 1	2.349215858	9.85347805	0.000148574	0.362579882	0	0.011764706	24.7431	977.2158	655.7371	3.8403	0.6893	48	0.439962494	0.001016313	0.413985196	0.000956306
0.916152113	×ÔÉí³µÁ¾	Road 1	2.394920472	9.867693329	0.000148574	0.36128974	0	0.011764706	24.7841	977.2158	655.7371	3.841	0.6886	49	0.449396817	0.001038107	0.421478561	0.000973615
0.93281209	×ÔÉí³µÁ¾	Road 1	2.440655793	9.882796097	0.000148574	0.360434145	0	0.011764706	24.828	977.2168	655.7371	3.8409	0.6888	50	0.454230926	0.001049273	0.429046038	0.000991096
0.94944201	×ÔÉí³µÁ¾	Road 1	2.48638241	9.898774338	0.000148574	0.359164	0	0.011764706	24.8747	977.2178	655.7371	3.8407	0.6889	51	0.459116835	0.00106056	0.436681114	0.001008733
0.966180796	×ÔÉí³µÁ¾	Road 1	2.532482364	9.914687347	0.000148574	0.358299315	0	0.011764706	24.9215	977.2188	655.7371	3.8406	0.6891	52	0.458504364	0.001059145	0.44435592	0.001026462
0.982820979	×ÔÉí³µÁ¾	Road 1	2.578409634	9.93607893	0.000148574	0.35616231	0	0.011764706	24.9849	977.2197	655.7371	3.8408	0.6889	53	0.487547502	0.001126235	0.4524688	0.001045203
0.99946886	×ÔÉí³µÁ¾	Road 1	2.624388113	9.942558289	0.000148574	0.355738819	0	0.011764706	25.0042	977.2197	655.7371	3.8411	0.6885	54	0.410761496	0.000948859	0.459307108	0.001060999
1.016158895	×ÔÉí³µÁ¾	Road 1	2.6705728	9.961925125	0.000148574	0.354018748	0	0.011764706	25.0623	977.2207	655.7371	3.8412	0.6885	55	0.477282753	0.001102523	0.467272974	0.001079401
1.032811907	×ÔÉí³µÁ¾	Road 1	2.716718693	9.975685501	0.000148574	0.353168517	0	0.011764706	25.1038	977.2217	655.7371	3.841	0.6887	56	0.448774507	0.001036669	0.474746422	0.001096664
1.049459788	×ÔÉí³µÁ¾	Road 1	2.762922228	9.991225147	0.000148574	0.352098346	0	0.011764706	25.151	977.2227	655.7371	3.8409	0.6888	57	0.458242936	0.001058541	0.482375195	0.001114287
1.0661139	×ÔÉí³µÁ¾	Road 1	2.809214568	10.00668325	0.000148574	0.350598216	0	0.011764706	25.1982	977.2227	655.7371	3.8417	0.688	58	0.45803494	0.001058061	0.49000336	0.001131908
1.082757382	×ÔÉí³µÁ¾	Road 1	2.85554435	10.02117319	0.000148574	0.349738002	0	0.011764706	25.2427	977.2236	655.7371	3.8416	0.6881	59	0.453284918	0.001047088	0.4975476	0.001149335
1.099461346	×ÔÉí³µÁ¾	Road 1	2.902126218	10.03921738	0.000148574	0.348877966	0	0.011764706	25.2984	977.2246	655.7371	3.8416	0.6881	60	0.471718221	0.001089669	0.505427164	0.001167537
1.116114358	×ÔÉí³µÁ¾	Road 1	2.948653129	10.05805292	0.000148574	0.347167701	0	0.011764706	25.357	977.2256	655.7371	3.8417	0.688	61	0.476450554	0.001100601	0.513361501	0.001185865
1.132821988	×ÔÉí³µÁ¾	Road 1	2.995374122	10.06788568	0.000148574	0.346958995	0	0.011764706	25.3794	977.2266	655.7371	3.8411	0.6886	62	0.429478788	0.000992096	0.520537073	0.001202441
1.149514588	×ÔÉí³µÁ¾	Road 1	3.04213153	10.08390942	0.000148574	0.345008761	0	0.011764706	25.4381	977.2275	655.7371	3.8412	0.6885	63	0.46201696	0.001067259	0.528249338	0.001220256
1.166163202	×ÔÉí³µÁ¾	Road 1	3.088823101	10.09631538	0.000148574	0.344387233	0	0.011764706	25.4774	977.2275	655.7371	3.8419	0.6878	64	0.443504187	0.001024495	0.535633068	0.001237312
1.182748035	×ÔÉí³µÁ¾	Road 1	3.135400819	10.11042938	0.000148574	0.343288481	0	0.011764706	25.5223	977.2285	655.7371	3.8417	0.688	65	0.452941725	0.001046295	0.543145031	0.001254665
1.199505149	×ÔÉí³µÁ¾	Road 1	3.182548197	10.12886581	0.000148574	0.342001557	0	0.011764706	25.57	977.2295	655.7371	3.8416	0.6881	66	0.474998006	0.001097245	0.551104627	0.001273052
1.21610721	×ÔÉí³µÁ¾	Road 1	3.229303682	10.13848486	0.000148574	0.341148138	0	0.011764706	25.6123	977.2305	655.7371	3.8414	0.6883	67	0.429594824	0.000992364	0.558236786	0.001289527
1.233145107	×ÔÉí³µÁ¾	Road 1	3.277393669	10.16111069	0.000148574	0.339861333	0	0.011764706	25.6855	977.2314	655.7371	3.8418	0.6879	68	0.495512887	0.001144635	0.566679283	0.001309029
1.249439994	×ÔÉí³µÁ¾	Road 1	3.323413948	10.1671772	0.000147805	0.338991135	0	0.011764706	25.7053	977.2314	655.7371	3.8421	0.6876	69	0.411779841	0.000951211	0.573389189	0.001324529
1.266147623	×ÔÉí³µÁ¾	Road 1	3.370704102	10.18962965	0.000145261	0.337716341	0	0.011764706	25.7788	977.2324	655.7371	3.8425	0.6872	70	0.497459237	0.001149131	0.581700554	0.001343728
1.282768379	×ÔÉí³µÁ¾	Road 1	3.417776131	10.19564381	0.000140012	0.337277651	0	0.011764706	25.7986	977.2334	655.7371	3.8419	0.6878	71	0.411172494	0.000949808	0.588534551	0.001359515
1.299447417	×ÔÉí³µÁ¾	Road 1	3.465116184	10.21786709	0.000131785	0.335140675	0	0.011764706	25.8723	977.2344	655.7371	3.8422	0.6875	72	0.496999375	0.001148069	0.596824023	0.001378663
1.316135252	×ÔÉí³µÁ¾	Road 1	3.51253636	10.22976494	0.000119615	0.334285796	0	0.011764706	25.9121	977.2354	655.7371	3.842	0.6877	73	0.442558163	0.001022309	0.604209361	0.001395724
1.33276847	×ÔÉí³µÁ¾	Road 1	3.559856094	10.24161644	0.000105537	0.333427042	0	0.011764706	25.9519	977.2354	655.7371	3.8427	0.687	74	0.442684107	0.0010226	0.611572622	0.001412733
1.349437611	×ÔÉí³µÁ¾	Road 1	3.607363847	10.26015158	9.28E-05	0.332135618	0	0.011764706	26.0145	977.2373	655.7371	3.8419	0.6878	75	0.478305873	0.001104887	0.61954557	0.00143115
1.366093923	×ÔÉí³µÁ¾	Road 1	3.654889354	10.2718915	8.20E-05	0.331275403	0	0.011764706	26.0545	977.2373	655.7371	3.8426	0.6871	76	0.442424379	0.001022	0.626914728	0.001448173
1.382852137	×ÔÉí³µÁ¾	Road 1	3.702763966	10.28442535	7.17E-05	0.330410004	0	0.011764706	26.0973	977.2383	655.7371	3.8424	0.6873	77	0.446423191	0.001031238	0.634395984	0.001465455
1.39951468	×ÔÉí³µÁ¾	Road 1	3.750419222	10.29608288	6.44E-05	0.329559773	0	0.011764706	26.1373	977.2393	655.7371	3.8422	0.6875	78	0.442296942	0.001021706	0.641765775	0.001482479
1.416101345	×ÔÉí³µÁ¾	Road 1	3.797949127	10.31597672	5.79E-05	0.328269631	0	0.011764706	26.206	977.2402	655.7371	3.8425	0.6873	79	0.487058154	0.001125104	0.649844446	0.001501141
1.432754358	×ÔÉí³µÁ¾	Road 1	3.845726401	10.32835264	5.36E-05	0.32741493	0	0.011764706	26.249	977.2412	655.7371	3.8423	0.6875	80	0.446624794	0.001031703	0.657282094	0.001518322
1.449418367	×ÔÉí³µÁ¾	Road 1	3.893588454	10.33985224	5.07E-05	0.326549351	0	0.011764706	26.2892	977.2412	655.7371	3.843	0.6867	81	0.442050603	0.001021137	0.66464843	0.001535338
1.466146157	×ÔÉí³µÁ¾	Road 1	3.941686904	10.35130291	4.99E-05	0.325689316	0	0.011764706	26.3294	977.2422	655.7371	3.8427	0.687	82	0.441711368	0.001020353	0.672037285	0.001552406
1.482765813	×ÔÉí³µÁ¾	Road 1	3.98953834	10.36514654	4.98E-05	0.324395776	0	0.011764706	26.3783	977.2432	655.7371	3.8427	0.6871	83	0.45518132	0.001051469	0.679602242	0.001569881
1.499453282	×ÔÉí³µÁ¾	Road 1	4.037671346	10.38376923	4.91E-05	0.323115617	0	0.011764706	26.4446	977.2441	655.7371	3.8429	0.6868	84	0.480815681	0.001110684	0.687625838	0.001588416
1.516115824	×ÔÉí³µÁ¾	Road 1	4.085784666	10.3950491	4.72E-05	0.322254151	0	0.011764706	26.485	977.2451	655.7371	3.8426	0.6871	85	0.441631215	0.001020168	0.694984537	0.001605414
1.53286964	×ÔÉí³µÁ¾	Road 1	4.134213844	10.40628862	4.40E-05	0.321395367	0	0.011764706	26.5254	977.2451	655.7371	3.8434	0.6863	86	0.4412366	0.001019257	0.702376934	0.001622491
1.549427714	×ÔÉí³µÁ¾	Road 1	4.182158114	10.42387962	4.01E-05	0.320533872	0	0.011764706	26.5891	977.2461	655.7371	3.8436	0.6862	87	0.476696326	0.001101169	0.710270107	0.001640724
1.566118482	×ÔÉí³µÁ¾	Road 1	4.230512436	10.42945175	3.59E-05	0.319675118	0	0.011764706	26.6093	977.2471	655.7371	3.8429	0.6868	88	0.41119972	0.000949871	0.717133346	0.001656578
1.582766363	×ÔÉí³µÁ¾	Road 1	4.278819615	10.44612522	3.23E-05	0.318813622	0	0.011764706	26.6702	977.248	655.7371	3.8431	0.6866	89	0.471589399	0.001089372	0.72498431	0.001674714
1.599423407	×ÔÉí³µÁ¾	Road 1	4.327208274	10.45798788	2.85E-05	0.317953587	0	0.011764706	26.7138	977.249	655.7371	3.8429	0.6868	90	0.445667734	0.001029492	0.732407817	0.001691862
1.6161402	×ÔÉí³µÁ¾	Road 1	4.375858173	10.47686806	2.48E-05	0.316234589	0	0.011764706	26.7835	977.25	655.7371	3.8432	0.6865	91	0.483652679	0.001117238	0.740492939	0.001710539
1.632839399	×ÔÉí³µÁ¾	Road 1	4.424482296	10.48235006	2.12E-05	0.316227973	0	0.011764706	26.8039	977.25	655.7371	3.8435	0.6862	92	0.411259874	0.00095001	0.74736065	0.001726403
1.649527601	×ÔÉí³µÁ¾	Road 1	4.473202668	10.51002016	1.85E-05	0.427372098	0	0	26.8855	977.251	655.7371	3.8441	0.6857	93	0.532143843	0.001229252	0.756241173	0.001746917
1.666214703	×ÔÉí³µÁ¾	Road 1	4.521996626	10.52658806	1.57E-05	0.425248682	0	0	26.9264	977.252	655.7371	3.8438	0.6859	94	0.47212305	0.001090604	0.764119539	0.001765116
1.682743819	×ÔÉí³µÁ¾	Road 1	4.570403388	10.542871	1.38E-05	0.418997705	0	0	26.9674	977.2529	655.7371	3.8436	0.6861	95	0.471685062	0.001089592	0.771916076	0.001783126
1.699432388	×ÔÉí³µÁ¾	Road 1	4.619351331	10.55888014	1.20E-05	0.41439718	0	0	27.0084	977.2539	655.7371	3.8434	0.6864	96	0.469592874	0.00108476	0.779752909	0.001801229
1.716057909	×ÔÉí³µÁ¾	Road 1	4.668197958	10.57698355	1.03E-05	0.412281454	0	0	27.0554	977.2539	655.7371	3.8442	0.6855	97	0.481711612	0.001112754	0.787761616	0.001819729
1.732841782	×ÔÉí³µÁ¾	Road 1	4.717630413	10.60284691	8.68E-06	0.410567999	0	0	27.1231	977.2559	655.7371	3.8435	0.6862	98	0.523492295	0.001209267	0.796547844	0.001840026
1.750307816	×ÔÉí³µÁ¾	Road 1	4.769137066	10.61625967	7.29E-06	0.408890933	0	0	27.1584	977.2559	655.7371	3.8441	0.6856	99	0.452980857	0.001046386	0.804459623	0.001858302
1.766078161	×ÔÉí³µÁ¾	Road 1	4.815721222	10.6340704	5.94E-06	0.407176018	0	0	27.2056	977.2568	655.7371	3.844	0.6857	100	0.486411914	0.001123612	0.812130507	0.001876021
1.782848105	×ÔÉí³µÁ¾	Road 1	4.865376558	10.65949945	4.87E-06	0.404165596	0	0	27.2736	977.2578	655.7371	3.8443	0.6854	101	0.522425194	0.001206802	0.820891548	0.001896259
1.799416443	×ÔÉí³µÁ¾	Road 1	4.914505439	10.6748168	3.92E-06	0.401609927	0	0	27.3151	977.2588	655.7371	3.844	0.6857	102	0.468251212	0.00108166	0.828649692	0.001914181
1.816086317	×ÔÉí³µÁ¾	Road 1	4.964005741	10.69000797	3.09E-06	0.399048179	0	0	27.3567	977.2598	655.7371	3.8438	0.6859	103	0.467272662	0.0010794	0.836439068	0.001932174
1.832747393	×ÔÉí³µÁ¾	Road 1	5.013549701	10.70508585	2.50E-06	0.39647451	0	0	27.3983	977.2598	655.7371	3.8446	0.6851	104	0.466924956	0.001078597	0.844218541	0.001950145
1.84937548	×ÔÉí³µÁ¾	Road 1	5.063113764	10.73067713	1.99E-06	0.393068612	0	0	27.4697	977.2617	655.7371	3.8439	0.6858	105	0.526012282	0.001215088	0.852965119	0.001970349
1.866066981	×ÔÉí³µÁ¾	Road 1	5.112910943	10.74018717	1.60E-06	0.391353875	0	0	27.4965	977.2617	655.7371	3.8444	0.6853	106	0.436393859	0.00100807	0.860249187	0.001987176
1.882727691	×ÔÉí³µÁ¾	Road 1	5.16273743	10.76636896	1.29E-06	0.387937993	0	0	27.5712	977.2627	655.7371	3.8448	0.6849	107	0.529774374	0.001223779	0.869075605	0.002007565
1.899454748	×ÔÉí³µÁ¾	Road 1	5.21282981	10.78089066	1.11E-06	0.386233091	0	0	27.6131	977.2637	655.7371	3.8446	0.6851	108	0.464681418	0.001073414	0.876848357	0.00202552
1.916110693	×ÔÉí³µÁ¾	Road 1	5.262775943	10.79530935	9.62E-07	0.383652776	0	0	27.6551	977.2646	655.7371	3.8444	0.6854	109	0.464671173	0.00107339	0.884587894	0.002043398
1.932721185	×ÔÉí³µÁ¾	Road 1	5.312684679	10.81674471	8.26E-07	0.381102473	0	0	27.7181	977.2656	655.7371	3.8445	0.6852	110	0.5046414	0.001165722	0.892970236	0.002062761
1.94943138	×ÔÉí³µÁ¾	Road 1	5.362958753	10.83091278	7.26E-07	0.378956765	0	0	27.7602	977.2666	655.7371	3.8443	0.6854	111	0.463549558	0.001070799	0.90071624	0.002080655
1.966134977	×ÔÉí³µÁ¾	Road 1	5.413278285	10.84498816	6.27E-07	0.377256483	0	0	27.8023	977.2666	655.7371	3.8451	0.6846	112	0.463274098	0.001070163	0.908454584	0.00209853
1.982722742	×ÔÉí³µÁ¾	Road 1	5.463349975	10.86692991	4.91E-07	0.375104845	0.011764706	0	27.8687	977.2676	655.7371	3.8453	0.6844	113	0.508618553	0.001174909	0.916891429	0.002118019
1.999461162	×ÔÉí³µÁ¾	Road 1	5.513941188	10.88085766	3.86E-07	0.375096112	0.011764706	0	27.9109	977.2686	655.7371	3.8451	0.6846	114	0.462821281	0.001069117	0.924638326	0.002135915
2.016159261	×ÔÉí³µÁ¾	Road 1	5.564507377	10.90173683	2.73E-07	0.374666184	0.011764706	0	27.9745	977.2695	655.7371	3.8453	0.6844	115	0.502481108	0.001160731	0.933028805	0.002155297
2.032753991	×ÔÉí³µÁ¾	Road 1	5.61482451	10.9156148	1.70E-07	0.373800218	0.011764706	0	28.0169	977.2705	655.7371	3.8451	0.6846	116	0.463738138	0.001071235	0.940724415	0.002173073
2.049492045	×ÔÉí³µÁ¾	Road 1	5.665640582	10.92945843	9.31E-08	0.373364598	0.019607844	0	28.0594	977.2715	655.7371	3.8449	0.6848	117	0.463076438	0.001069707	0.948475413	0.002190978
2.066149822	×ÔÉí³µÁ¾	Road 1	5.716308888	10.95019426	3.94E-08	0.372925937	0.019607844	0	28.1232	977.2725	655.7371	3.8451	0.6847	118	0.502855027	0.001161595	0.95685186	0.002210328
2.082706797	×ÔÉí³µÁ¾	Road 1	5.766734131	10.96401215	9.14E-09	0.372921288	0.019607844	0	28.1658	977.2725	655.7371	3.8458	0.6839	119	0.46430152	0.001072537	0.964539289	0.002228086
2.09941516	×ÔÉí³µÁ¾	Road 1	5.817716481	10.98470678	6.58E-10	0.372485816	0.027450981	0	28.2298	977.2744	655.7371	3.845	0.6847	120	0.502903678	0.001161707	0.972941985	0.002247496
2.132939285	×ÔÉí³µÁ¾	Road 1	5.920137363	10.99850235	-1.06E-10	0.372471184	0.027450981	0	28.2725	977.2744	655.7371	3.8458	0.6839	121	0.424633054	0.000980902	0.987177437	0.00228038
2.149425515	×ÔÉí³µÁ¾	Road 1	5.970662846	11.03294964	-9.96E-09	0.371172279	0.027450981	0	28.3796	977.2764	655.7371	3.8458	0.6839	122	0.584723311	0.001350711	0.99681732	0.002302648
2.16622405	×ÔÉí³µÁ¾	Road 1	6.022209521	11.04667912	-1.54E-07	0.371165663	0.035294119	0	28.4225	977.2773	655.7371	3.8456	0.6841	123	0.463893972	0.001071595	1.004610059	0.002320649
2.182716144	×ÔÉí³µÁ¾	Road 1	6.072878752	11.0604043	-3.09E-07	0.371355653	0.043137256	0	28.4655	977.2783	655.7371	3.8454	0.6843	124	0.465523492	0.001075359	1.012287517	0.002338384
2.199426706	×ÔÉí³µÁ¾	Road 1	6.124319902	11.08210144	-5.63E-07	0.373891294	0.050980393	0	28.5332	977.2793	655.7371	3.8457	0.684	125	0.510422618	0.001179076	1.020816965	0.002358087
2.216070555	×ÔÉí³µÁ¾	Road 1	6.175620108	11.09603605	-9.27E-07	0.376446277	0.06666667	0	28.5763	977.2803	655.7371	3.8455	0.6842	126	0.466534801	0.001077695	1.0285819	0.002376024
2.232856994	×ÔÉí³µÁ¾	Road 1	6.227425652	11.11015606	-1.55E-06	0.38093698	0.082352944	0	28.6195	977.2803	655.7371	3.8463	0.6835	127	0.467123458	0.001079055	1.036423239	0.002394138
2.252308296	×ÔÉí³µÁ¾	Road 1	6.287572449	11.13182402	-2.30E-06	0.3892124	0.090196081	0	28.6843	977.2813	655.737	3.8465	0.6833	128	0.49364049	0.00114031	1.04602519	0.002416318
2.266086775	×ÔÉí³µÁ¾	Road 1	6.330234493	11.14661179	-3.48E-06	0.394965649	0.105882354	0	28.7277	977.2822	655.7371	3.8463	0.6834	129	0.490012231	0.001131928	1.052776813	0.002431914
2.282723659	×ÔÉí³µÁ¾	Road 1	6.381852115	11.1693655	-5.19E-06	0.404084504	0.113725491	0	28.7927	977.2832	655.737	3.8465	0.6832	130	0.518752944	0.001198319	1.061407245	0.002451851
2.299521461	×ÔÉí³µÁ¾	Road 1	6.43404155	11.18491373	-6.40E-06	0.409397811	0.113725491	0	28.8362	977.2842	655.7371	3.8463	0.6834	131	0.476400907	0.001100486	1.069409734	0.002470336
2.316144416	×ÔÉí³µÁ¾	Road 1	6.485765805	11.20181808	-7.97E-06	0.414078325	0.121568628	0	28.8828	977.2852	655.7371	3.8462	0.6836	132	0.48549557	0.001121495	1.077480105	0.002488979
2.332731082	×ÔÉí³µÁ¾	Road 1	6.537450736	11.21779118	-9.56E-06	0.417468846	0.121568628	0	28.9264	977.2861	655.7371	3.846	0.6837	133	0.480540743	0.001110049	1.085450673	0.002507391
2.349456306	×ÔÉí³µÁ¾	Road 1	6.589685535	11.24321423	-1.10E-05	0.422569662	0.129411772	0	28.995	977.2871	655.7371	3.8462	0.6835	134	0.534973004	0.001235788	1.094398217	0.00252806
2.366188128	×ÔÉí³µÁ¾	Road 1	6.642017042	11.25958815	-1.24E-05	0.425518632	0.145098045	0	29.0388	977.2881	655.7371	3.8461	0.6837	135	0.482729017	0.001115104	1.102475153	0.002546718
2.382744369	×ÔÉí³µÁ¾	Road 1	6.693914576	11.28463354	-1.39E-05	0.434858739	0.160784319	0	29.1045	977.2891	655.7371	3.8463	0.6834	136	0.535130996	0.001236153	1.111334911	0.002567184
2.399433304	×ÔÉí³µÁ¾	Road 1	6.746313007	11.30295925	-1.50E-05	0.441182226	0.168627456	0	29.1516	977.2891	655.737	3.8471	0.6826	137	0.495084852	0.001143646	1.119597349	0.00258627
2.416180155	×ÔÉí³µÁ¾	Road 1	6.798974453	11.32040949	-1.58E-05	0.448386461	0.184313729	0	29.1956	977.29	655.737	3.847	0.6828	138	0.489908758	0.001131689	1.127801778	0.002605222
2.432747027	×ÔÉí³µÁ¾	Road 1	6.851158039	11.33955231	-1.70E-05	0.457877785	0.20784314	0	29.2428	977.291	655.737	3.8468	0.6829	139	0.501334276	0.001158082	1.136107319	0.002624408
2.449426798	×ÔÉí³µÁ¾	Road 1	6.903832378	11.36871843	-1.77E-05	0.473714173	0.20784314	0	29.3122	977.292	655.737	3.8471	0.6826	140	0.559999056	0.001293598	1.145447975	0.002645985
2.466065881	×ÔÉí³µÁ¾	Road 1	6.956466446	11.38780546	-1.87E-05	0.480907708	0.215686277	0	29.3564	977.293	655.737	3.847	0.6828	141	0.501368905	0.001158162	1.153790294	0.002665256
2.482916467	×ÔÉí³µÁ¾	Road 1	7.009860605	11.40725727	-1.99E-05	0.488051951	0.223529413	0	29.4007	977.2939	655.737	3.8468	0.6829	142	0.502425294	0.001160602	1.162256455	0.002684812
2.499411128	×ÔÉí³µÁ¾	Road 1	7.062217968	11.42712278	-2.10E-05	0.496899992	0.223529413	0	29.4451	977.2939	655.737	3.8476	0.6821	143	0.507708323	0.001172806	1.170630931	0.002704157
2.5160876	×ÔÉí³µÁ¾	Road 1	7.115314746	11.46216059	-2.18E-05	0.511209488	0.223529413	0	29.5214	977.2959	655.737	3.847	0.6827	144	0.596951273	0.001378957	1.180585972	0.002727154
2.532712387	×ÔÉí³µÁ¾	Road 1	7.16834386	11.48314276	-2.29E-05	0.518770397	0.223529413	0	29.566	977.2969	655.737	3.8469	0.6829	145	0.514446122	0.001188371	1.18913853	0.00274691
2.54946437	×ÔÉí³µÁ¾	Road 1	7.221885315	11.50605526	-2.39E-05	0.52716285	0.23137255	0	29.6139	977.2969	655.737	3.8477	0.682	146	0.525358281	0.001213578	1.197939323	0.00276724
2.566131311	×ÔÉí³µÁ¾	Road 1	7.275255975	11.52787256	-2.45E-05	0.535958648	0.239215687	0	29.6587	977.2979	655.737	3.8476	0.6822	147	0.519946757	0.001201077	1.206605245	0.002787258
2.582707714	×ÔÉí³µÁ¾	Road 1	7.328506211	11.56468363	-2.53E-05	0.550637543	0.239215687	0	29.7325	977.2988	655.737	3.8479	0.6818	148	0.611533963	0.001412643	1.216742278	0.002810675
2.599454198	×ÔÉí³µÁ¾	Road 1	7.382409772	11.58767509	-2.57E-05	0.559421837	0.254901975	0	29.7775	977.2998	655.737	3.8478	0.682	149	0.527474032	0.001218465	1.225575613	0.00283108
2.616196283	×ÔÉí³µÁ¾	Road 1	7.436464248	11.62317038	-2.59E-05	0.576554298	0.262745112	0	29.8452	977.3008	655.737	3.848	0.6817	150	0.603037582	0.001393017	1.23567172	0.002854402
2.633437252	×ÔÉí³µÁ¾	Road 1	7.492246264	11.6475626	-2.59E-05	0.588242829	0.262745112	0	29.8904	977.3018	655.737	3.8479	0.6819	151	0.532852158	0.001230888	1.244858607	0.002875623
2.649369249	×ÔÉí³µÁ¾	Road 1	7.543903717	11.67253761	-2.59E-05	0.599487484	0.270588249	0	29.9358	977.3027	655.737	3.8477	0.682	152	0.548747075	0.001267606	1.253601244	0.002895819
2.66614579	×ÔÉí³µÁ¾	Road 1	7.59841849	11.69807138	-2.59E-05	0.610749066	0.270588249	0	29.9812	977.3037	655.737	3.8476	0.6822	153	0.544682066	0.001258216	1.262739125	0.002916927
2.682805034	×ÔÉí³µÁ¾	Road 1	7.652690385	11.72795248	-2.59E-05	0.623637915	0.270588249	0	30.0333	977.3047	655.737	3.8475	0.6822	154	0.572778523	0.001323118	1.272281183	0.00293897
2.699387301	×ÔÉí³µÁ¾	Road 1	7.706861346	11.76048231	-2.59E-05	0.636506915	0.270588249	0	30.0887	977.3057	655.737	3.8476	0.6822	155	0.590572134	0.001364222	1.282074207	0.002961591
2.716075503	×ÔÉí³µÁ¾	Road 1	7.761532691	11.79377174	-2.59E-05	0.648091316	0.270588249	0	30.1443	977.3057	655.737	3.8486	0.6811	156	0.5947542	0.001373882	1.291999586	0.002984519
2.732698825	×ÔÉí³µÁ¾	Road 1	7.816139189	11.82575912	-2.59E-05	0.659300029	0.270588249	0	30.1968	977.3066	655.737	3.8485	0.6812	157	0.588366229	0.001359126	1.301780186	0.003007112
2.749448608	×ÔÉí³µÁ¾	Road 1	7.871322243	11.86039181	-2.59E-05	0.669651628	0.270588249	0	30.2527	977.3076	655.737	3.8486	0.6811	158	0.603866396	0.001394931	1.311894818	0.003030477
2.766136077	×ÔÉí³µÁ¾	Road 1	7.926463439	11.89565105	-2.59E-05	0.679548681	0.270588249	0	30.3088	977.3086	655.737	3.8486	0.6811	159	0.609411812	0.001407741	1.322064358	0.003053969
2.782758298	×ÔÉí³µÁ¾	Road 1	7.981613598	11.94428616	-2.58E-05	0.692754745	0.278431386	0	30.385	977.3105	655.737	3.8481	0.6817	160	0.694303916	0.001603842	1.333605232	0.003080628
2.799519445	×ÔÉí³µÁ¾	Road 1	8.037355073	11.97229013	-2.53E-05	0.701008677	0.278431386	0	30.4282	977.3105	655.737	3.8488	0.6809	161	0.565780323	0.001306953	1.343088359	0.003102534
2.816033899	×ÔÉí³µÁ¾	Road 1	8.092426486	12.00506458	-2.53E-05	0.710077167	0.278431386	0	30.4781	977.3115	655.737	3.8488	0.6809	162	0.598988039	0.001383662	1.352980319	0.003125385
2.832711837	×ÔÉí³µÁ¾	Road 1	8.148197048	12.03829994	-2.50E-05	0.718308389	0.278431386	0	30.5282	977.3125	655.737	3.8487	0.681	163	0.600662651	0.001387531	1.362998134	0.003148526
2.849415068	×ÔÉí³µÁ¾	Road 1	8.20430306	12.09236984	-2.50E-05	0.730215788	0.278431386	0	30.6086	977.3135	655.737	3.8492	0.6805	164	0.731577969	0.001689945	1.37521785	0.003176753
2.866094106	×ÔÉí³µÁ¾	Road 1	8.260476052	12.12436666	-2.47E-05	0.737206817	0.278431386	0	30.6557	977.3145	655.737	3.8491	0.6806	165	0.595040896	0.001374544	1.385142559	0.003199679
2.88274052	×ÔÉí³µÁ¾	Road 1	8.316688634	12.15668964	-2.47E-05	0.742911756	0.278431386	0	30.7029	977.3154	655.737	3.849	0.6808	166	0.598275601	0.001382017	1.395101703	0.003222685
2.89938217	×ÔÉí³µÁ¾	Road 1	8.373046724	12.19164762	-2.47E-05	0.749075472	0.278431386	0	30.7536	977.3164	655.737	3.8489	0.6808	167	0.615829035	0.001422565	1.405350114	0.003246359
2.916104095	×ÔÉí³µÁ¾	Road 1	8.429862542	12.23166275	-2.47E-05	0.755853653	0.278431386	0	30.8113	977.3174	655.737	3.849	0.6807	168	0.647672414	0.001496123	1.416180443	0.003271377
2.932687828	×ÔÉí³µÁ¾	Road 1	8.486461078	12.28642101	-2.47E-05	0.764207542	0.278431386	0	30.8896	977.3184	655.7369	3.8494	0.6803	169	0.745374825	0.001721816	1.42854154	0.003299931
2.949359535	×ÔÉí³µÁ¾	Road 1	8.543515728	12.32007866	-2.47E-05	0.769125462	0.278431386	0	30.9375	977.3193	655.737	3.8493	0.6804	170	0.610475625	0.001410199	1.438719211	0.003323441
2.966066431	×ÔÉí³µÁ¾	Road 1	8.600927003	12.37097454	-2.47E-05	0.775226295	0.278431386	0	31.0095	977.3203	655.7369	3.8496	0.6801	171	0.721238258	0.00166606	1.450768864	0.003351276
2.98270808	×ÔÉí³µÁ¾	Road 1	8.658272132	12.40516863	-2.47E-05	0.777502418	0.278431386	0	31.0576	977.3213	655.737	3.8495	0.6802	172	0.616458664	0.00142402	1.461027753	0.003374974
2.999372456	×ÔÉí³µÁ¾	Road 1	8.715843369	12.43709679	-2.47E-05	0.782557249	0.278431386	0	31.1025	977.3223	655.7369	3.8494	0.6803	173	0.602397334	0.001391538	1.471066328	0.003398163
3.016048928	×ÔÉí³µÁ¾	Road 1	8.77370831	12.49147825	-2.47E-05	0.786447883	0.278431386	0	31.1787	977.3232	655.737	3.8498	0.6799	174	0.748414739	0.001728838	1.483547246	0.003426994
3.032788814	×ÔÉí³µÁ¾	Road 1	8.831955132	12.52628345	-2.47E-05	0.790711343	0.278431386	0	31.2273	977.3242	655.7369	3.8497	0.68	175	0.622188779	0.001437256	1.493962615	0.003451054
3.049979198	×ÔÉí³µÁ¾	Road 1	8.892020045	12.57875862	-2.45E-05	0.79540205	0.278431386	0	31.3005	977.3252	655.7369	3.85	0.6797	176	0.728975236	0.001683933	1.506493979	0.003480001
3.066057817	×ÔÉí³µÁ¾	Road 1	8.948357333	12.61390886	-2.45E-05	0.797812402	0.278431386	0	31.3495	977.3262	655.7369	3.85	0.6798	177	0.636086149	0.001469359	1.516721366	0.003503626
3.082851587	×ÔÉí³µÁ¾	Road 1	9.00736497	12.64918442	-2.45E-05	0.800252676	0.278431386	0	31.3986	977.3271	655.7369	3.8499	0.6798	178	0.627677871	0.001449936	1.527262444	0.003527976
3.099445584	×ÔÉí³µÁ¾	Road 1	9.065833755	12.68456469	-2.45E-05	0.801865697	0.270588249	0	31.4479	977.3281	655.7369	3.8498	0.6799	179	0.632053294	0.001460043	1.537750734	0.003552204
3.116069272	×ÔÉí³µÁ¾	Road 1	9.124675982	12.74278107	-2.45E-05	0.802645922	0.270588249	0	31.5291	977.3291	655.7369	3.8503	0.6794	180	0.783881119	0.001810765	1.550781729	0.003582306
3.132707255	×ÔÉí³µÁ¾	Road 1	9.183732679	12.77823772	-2.45E-05	0.802620173	0.270588249	0	31.5787	977.3301	655.7369	3.8502	0.6795	181	0.63439185	0.001465445	1.56133673	0.003606688
3.149444942	×ÔÉí³µÁ¾	Road 1	9.243390498	12.83141155	-2.45E-05	0.802603066	0.262745112	0	31.6534	977.3311	655.7369	3.8506	0.6791	182	0.75135152	0.001735622	1.573912617	0.003635738
3.166051769	×ÔÉí³µÁ¾	Road 1	9.302745127	12.86679697	-2.45E-05	0.800702631	0.262745112	0	31.7034	977.332	655.7369	3.8505	0.6792	183	0.636679892	0.001470731	1.584485849	0.003660162
3.182812915	×ÔÉí³µÁ¾	Road 1	9.362815719	12.90210857	-2.45E-05	0.799045444	0.262745112	0	31.7535	977.333	655.7369	3.8505	0.6793	184	0.63493067	0.00146669	1.595128015	0.003684746
3.199371723	×ÔÉí³µÁ¾	Road 1	9.422381005	12.94990768	-2.45E-05	0.797382236	0.254901975	0	31.8073	977.334	655.7369	3.8505	0.6793	185	0.723175826	0.001670536	1.607102945	0.003712408
3.216080452	×ÔÉí³µÁ¾	Road 1	9.482601903	12.97496853	-2.45E-05	0.794071734	0.254901975	0	31.8577	977.335	655.7369	3.8504	0.6793	186	0.568932949	0.001314235	1.616609091	0.003734367
3.232781483	×ÔÉí³µÁ¾	Road 1	9.543072715	13.03481913	-2.45E-05	0.789141059	0.247058824	0	31.9444	977.3359	655.7369	3.851	0.6787	187	0.80414072	0.001857565	1.63003907	0.00376539
3.249360085	×ÔÉí³µÁ¾	Road 1	9.603259898	13.06948957	-2.45E-05	0.785007596	0.247058824	0	31.9952	977.3369	655.7369	3.8509	0.6788	188	0.637540095	0.001472718	1.640608594	0.003789806
3.266080177	×ÔÉí³µÁ¾	Road 1	9.664132245	13.10641394	-2.45E-05	0.780879915	0.247058824	0	32.0497	977.3379	655.7369	3.851	0.6788	189	0.651719568	0.001505472	1.651505405	0.003814977
3.282672708	×ÔÉí³µÁ¾	Road 1	9.724776774	13.15774584	-2.45E-05	0.777199388	0.247058824	0	32.1263	977.3398	655.7369	3.8504	0.6793	190	0.753430287	0.001740424	1.66400672	0.003843856
3.299352479	×ÔÉí³µÁ¾	Road 1	9.785909037	13.1941947	-2.45E-05	0.772638679	0.247058824	0	32.1812	977.3398	655.7369	3.8514	0.6783	191	0.651443925	0.001504835	1.674872656	0.003868956
3.315994128	×ÔÉí³µÁ¾	Road 1	9.847058054	13.22804375	-2.45E-05	0.76934123	0.247058824	0	32.2326	977.3408	655.7369	3.8513	0.6784	192	0.635106451	0.001467096	1.685441874	0.003893371
3.332733647	×ÔÉí³µÁ¾	Road 1	9.90872338	13.26174088	-2.45E-05	0.766024888	0.247058824	0	32.2841	977.3418	655.7369	3.8513	0.6784	193	0.633562193	0.001463529	1.696047401	0.003917869
3.349356602	×ÔÉí³µÁ¾	Road 1	9.970147317	13.30245895	-2.45E-05	0.7627303	0.247058824	0	32.3468	977.3428	655.7369	3.8515	0.6782	194	0.684626988	0.001581488	1.707427925	0.003944159
3.366052868	×ÔÉí³µÁ¾	Road 1	10.0321071	13.35958614	-2.45E-05	0.758183837	0.247058824	0	32.4357	977.3447	655.7369	3.8511	0.6786	195	0.798092795	0.001843594	1.720753094	0.00397494
3.382665926	×ÔÉí³µÁ¾	Road 1	10.09391109	13.39274082	-2.45E-05	0.756099403	0.254901975	0	32.4877	977.3457	655.7369	3.8511	0.6786	196	0.634861638	0.00146653	1.731300087	0.003999303
3.399401047	×ÔÉí³µÁ¾	Road 1	10.15632309	13.42584743	-2.45E-05	0.756076336	0.262745112	0	32.5398	977.3467	655.7369	3.8511	0.6786	197	0.633670877	0.00146378	1.741904646	0.0040238
3.416122239	×ÔÉí³µÁ¾	Road 1	10.21884792	13.46132641	-2.45E-05	0.756479323	0.262745112	0	32.5958	977.3477	655.7369	3.8511	0.6786	198	0.65120776	0.00150429	1.752793616	0.004048953
3.43271367	×ÔÉí³µÁ¾	Road 1	10.28112762	13.51341619	-2.45E-05	0.757253587	0.262745112	0	32.6783	977.3486	655.7369	3.8516	0.6781	199	0.77104366	0.001781111	1.765586334	0.004078504
3.449413235	×ÔÉí³µÁ¾	Road 1	10.34396715	13.54659834	-2.45E-05	0.757639527	0.262745112	0	32.7309	977.3496	655.7369	3.8516	0.6781	200	0.63769513	0.001473076	1.776235565	0.004103104
3.466072846	×ÔÉí³µÁ¾	Road 1	10.40680999	13.57980194	-2.47E-05	0.75843668	0.270588249	0	32.7836	977.3506	655.7369	3.8516	0.6781	201	0.639232896	0.001476628	1.786884936	0.004127704
3.482554676	×ÔÉí³µÁ¾	Road 1	10.46923271	13.63451643	-2.47E-05	0.761294186	0.270588249	0	32.8706	977.3516	655.7369	3.8522	0.6775	202	0.796417093	0.001839723	1.800011348	0.004158026
3.499352845	×ÔÉí³µÁ¾	Road 1	10.53300942	13.66792946	-2.47E-05	0.762484372	0.270588249	0	32.9236	977.3525	655.7369	3.8522	0.6775	203	0.640965805	0.001480631	1.8107784	0.004182898
3.516055709	×ÔÉí³µÁ¾	Road 1	10.59665765	13.71822195	-2.47E-05	0.766157746	0.278431386	0	33.0035	977.3545	655.7369	3.8517	0.678	204	0.763005827	0.001762543	1.823522782	0.004212338
3.550187952	×ÔÉí³µÁ¾	Road 1	10.72750045	13.80026836	-2.47E-05	0.772235692	0.278431386	0	33.1334	977.3564	655.7369	3.8521	0.6776	205	0.693161866	0.001601204	1.847181951	0.00426699
3.632844897	×ÔÉí³µÁ¾	Road 1	11.04890442	13.99827032	-2.47E-05	0.78275305	0.278431386	0	33.4462	977.3613	655.7369	3.8529	0.6768	206	0.696612045	0.001609174	1.904761775	0.0044
3.651592778	×ÔÉí³µÁ¾	Road 1	11.12207365	14.0500803	-2.47E-05	0.786420643	0.286274523	0	33.528	977.3633	655.7369	3.8524	0.6773	207	0.744206498	0.001719117	1.91871407	0.00443223
3.667058515	×ÔÉí³µÁ¾	Road 1	11.18258282	14.08487864	-2.47E-05	0.794591665	0.36470589	0	33.5827	977.3643	655.7369	3.8524	0.6773	208	0.68308674	0.00157793	1.92927851	0.004456633
3.682693968	×ÔÉí³µÁ¾	Road 1	11.24391034	14.12041426	-2.47E-05	0.813824475	0.388235301	0	33.6375	977.3643	655.7369	3.8534	0.6763	209	0.686817364	0.001586548	1.94001721	0.00448144
3.699401597	×ÔÉí³µÁ¾	Road 1	11.3096256	14.15969467	-2.47E-05	0.83910507	0.411764711	0	33.6964	977.3662	655.7369	3.8526	0.6772	210	0.697424151	0.00161105	1.951669514	0.004508357
3.716083201	×ÔÉí³µÁ¾	Road 1	11.37542733	14.20044794	-2.47E-05	0.867552042	0.427450985	0	33.7555	977.3672	655.7369	3.8526	0.6771	211	0.709823311	0.001639692	1.963510506	0.004535709
3.73271422	×ÔÉí³µÁ¾	Road 1	11.44130549	14.26018095	-2.47E-05	0.910450816	0.450980395	0	33.8385	977.3682	655.7369	3.8532	0.6765	212	0.852608096	0.001969525	1.977690247	0.004568464
3.766040405	×ÔÉí³µÁ¾	Road 1	11.5743104	14.36761179	-2.47E-05	0.991709471	0.474509805	0	33.9777	977.3701	655.7369	3.8538	0.676	213	0.810510539	0.001872279	2.004701472	0.00463086
3.782728607	×ÔÉí³µÁ¾	Road 1	11.64112575	14.41349087	-2.47E-05	1.024940968	0.498039216	0	34.0336	977.3711	655.7369	3.8538	0.6759	214	0.754002166	0.001741745	2.017284412	0.004659927
3.799482789	×ÔÉí³µÁ¾	Road 1	11.70842711	14.46116123	-2.47E-05	1.064432263	0.552941203	0	34.0898	977.3721	655.7369	3.8538	0.6759	215	0.767472982	0.001772863	2.030142794	0.00468963
3.815992845	×ÔÉí³µÁ¾	Road 1	11.77499341	14.51470928	-2.47E-05	1.114859462	0.576470613	0	34.1501	977.373	655.7369	3.854	0.6758	216	0.818975028	0.001891832	2.043664117	0.004720864
3.832670783	×ÔÉí³µÁ¾	Road 1	11.84262428	14.59839592	-2.47E-05	1.193840384	0.600000024	0	34.2391	977.375	655.7369	3.8536	0.6761	217	1.044769711	0.002413418	2.061088722	0.004761115
3.850645597	×ÔÉí³µÁ¾	Road 1	11.91579684	14.65501671	-2.47E-05	1.247542024	0.623529434	0	34.296	977.376	655.7369	3.8537	0.676	218	0.81215579	0.00187608	2.075687071	0.004794837
3.866022261	×ÔÉí³µÁ¾	Road 1	11.97864639	14.71439953	-2.47E-05	1.303599834	0.647058845	0	34.3531	977.377	655.7369	3.8537	0.676	219	0.904536678	0.00208948	2.089595828	0.004826966
3.882659511	×ÔÉí³µÁ¾	Road 1	12.04710687	14.8136095	-2.47E-05	1.396382809	0.670588255	0	34.4433	977.3779	655.7369	3.8544	0.6753	220	1.176052833	0.002716682	2.109162113	0.004872164
3.89931509	×ÔÉí³µÁ¾	Road 1	12.11595211	14.88047161	-2.47E-05	1.450800419	0.686274529	0	34.501	977.3789	655.7369	3.8545	0.6752	221	0.9308153	0.002150183	2.12466538	0.004907977
3.916113259	×ÔÉí³µÁ¾	Road 1	12.18571119	14.95000477	-2.47E-05	1.503431201	0.701960802	0	34.559	977.3799	655.7369	3.8546	0.6752	222	0.949825483	0.002194097	2.140620709	0.004944834
3.932701391	×ÔÉí³µÁ¾	Road 1	12.2551264	15.06467113	-2.47E-05	1.586935163	0.709803939	0	34.6507	977.3818	655.7369	3.8543	0.6755	223	1.313679899	0.003034601	2.162412205	0.004995172
3.949417451	×ÔÉí³µÁ¾	Road 1	12.32540581	15.1354969	-2.47E-05	1.623824596	0.717647076	0	34.6927	977.3828	655.7369	3.854	0.6757	224	0.970624555	0.002242143	2.178637223	0.005032652
3.965991287	×ÔÉí³µÁ¾	Road 1	12.39558232	15.24302731	-2.47E-05	1.703139305	0.717647076	0	34.7854	977.3838	655.7369	3.8548	0.675	225	1.270200555	0.002934163	2.199689319	0.005081282
3.98279862	×ÔÉí³µÁ¾	Road 1	12.46713118	15.32521019	-2.47E-05	1.75244832	0.725490212	0	34.8449	977.3848	655.7369	3.8549	0.6749	226	1.065052541	0.002460271	2.217590011	0.005122633
3.999343498	×ÔÉí³µÁ¾	Road 1	12.53815027	15.45304298	-2.47E-05	1.824366331	0.733333349	0	34.9347	977.3867	655.7369	3.8545	0.6752	227	1.447746799	0.003344295	2.241542806	0.005177964
4.016063224	×ÔÉí³µÁ¾	Road 1	12.6103295	15.54123745	-2.47E-05	1.8705827	0.733333349	0	34.9949	977.3877	655.7369	3.8547	0.6751	228	1.127318711	0.002604106	2.260391266	0.005221504
4.032657587	×ÔÉí³µÁ¾	Road 1	12.68238455	15.63170471	-2.47E-05	1.914674997	0.741176486	0	35.0555	977.3887	655.7369	3.8548	0.6749	229	1.155910598	0.002670153	2.279572866	0.005265813
4.049392708	×ÔÉí³µÁ¾	Road 1	12.75573229	15.77830524	-2.47E-05	1.981770158	0.741176486	0	35.1515	977.3896	655.7369	3.8555	0.6742	230	1.61165427	0.003722921	2.306544096	0.005328117
4.065973876	×ÔÉí³µÁ¾	Road 1	12.82884723	15.87426052	-2.47E-05	2.021845818	0.741176486	0	35.2131	977.3916	655.7369	3.8547	0.675	231	1.214956961	0.002806551	2.3266895	0.005374653
4.082748585	×ÔÉí³µÁ¾	Road 1	12.90327171	15.9721487	-2.47E-05	2.058799028	0.741176486	0	35.275	977.3926	655.7369	3.8549	0.6749	232	1.227233785	0.00283491	2.34727599	0.005422208
4.099345881	×ÔÉí³µÁ¾	Road 1	12.97740189	16.07904396	-2.47E-05	2.096754551	0.741176486	0	35.3418	977.3936	655.7369	3.8551	0.6746	233	1.317025261	0.003042328	2.369135048	0.005472702
4.11599706	×ÔÉí³µÁ¾	Road 1	13.05247987	16.23192558	-2.47E-05	2.144322872	0.741176486	0	35.436	977.3945	655.7369	3.8558	0.6739	234	1.708116266	0.003945749	2.397577199	0.005538403
4.132655204	×ÔÉí³µÁ¾	Road 1	13.12806989	16.33579788	-2.47E-05	2.174077034	0.741176486	0	35.4994	977.3955	655.7369	3.856	0.6737	235	1.30454899	0.003013508	2.419308564	0.005588603
4.149344506	×ÔÉí³µÁ¾	Road 1	13.2045712	16.50187168	-2.47E-05	2.216392994	0.741176486	0	35.5997	977.3975	655.7369	3.8559	0.6738	236	1.840294627	0.004251081	2.450021796	0.00565955
4.166043704	×ÔÉí³µÁ¾	Road 1	13.28161599	16.60925446	-2.47E-05	2.242086649	0.749019623	0	35.6641	977.3984	655.7369	3.8561	0.6736	237	1.349200339	0.003116653	2.47255236	0.005711596
4.182702948	×ÔÉí³µÁ¾	Road 1	13.35923264	16.7726675	-2.47E-05	2.278450012	0.749019623	0	35.7615	977.4004	655.7369	3.8559	0.6738	238	1.845354275	0.004262768	2.503294567	0.00578261
4.199331402	×ÔÉí³µÁ¾	Road 1	13.43721588	16.8830904	-2.47E-05	2.300774813	0.749019623	0	35.8269	977.4014	655.7369	3.8561	0.6736	239	1.397029503	0.003227138	2.526525007	0.005836273
4.215987346	×ÔÉí³µÁ¾	Road 1	13.51584395	16.99459476	-2.47E-05	2.321277618	0.749019623	0	35.8928	977.4023	655.7369	3.8563	0.6734	240	1.412164988	0.003262101	2.550045949	0.005890606
4.232657587	×ÔÉí³µÁ¾	Road 1	13.5953224	17.16366577	-2.47E-05	2.349041462	0.749019623	0	35.9924	977.4043	655.7369	3.8562	0.6735	241	1.930440865	0.004459318	2.582226863	0.005964944
4.249395641	×ÔÉí³µÁ¾	Road 1	13.67569147	17.28568096	-2.47E-05	2.368434191	0.75686276	0	36.0642	977.4053	655.7369	3.8565	0.6732	242	1.519552187	0.003510166	2.607661209	0.006023697
4.266064781	×ÔÉí³µÁ¾	Road 1	13.75626128	17.40049496	-2.47E-05	2.386024952	0.764705896	0	36.1316	977.4063	655.7369	3.8568	0.673	243	1.467673153	0.003390325	2.632126059	0.006080211
4.283207513	×ÔÉí³µÁ¾	Road 1	13.83994825	17.57439308	-2.47E-05	2.41177845	0.764705896	0	36.2337	977.4082	655.7369	3.8567	0.6731	244	1.969732365	0.004550082	2.665892652	0.006158212
4.299440452	×ÔÉí³µÁ¾	Road 1	13.91975912	17.6997591	-2.47E-05	2.429662704	0.772549033	0	36.3072	977.4092	655.7369	3.857	0.6727	245	1.614788996	0.003730163	2.692105424	0.006218764
4.316039214	×ÔÉí³µÁ¾	Road 1	14.00191216	17.81765099	-2.47E-05	2.447225094	0.78039217	0	36.3762	977.4102	655.7368	3.8573	0.6724	246	1.528596847	0.003531059	2.717478239	0.006277375
4.332630645	×ÔÉí³µÁ¾	Road 1	14.08485159	17.99615479	-2.47E-05	2.473488808	0.788235307	0	36.4807	977.4121	655.7368	3.8572	0.6725	247	2.104904461	0.004862329	2.752401616	0.006358048
4.349399856	×ÔÉí³µÁ¾	Road 1	14.16927445	18.12382793	-2.47E-05	2.479978085	0.796078444	0	36.556	977.4141	655.7369	3.8566	0.6731	248	1.629239603	0.003763543	2.779722679	0.006421159
4.365991287	×ÔÉí³µÁ¾	Road 1	14.25336045	18.24493675	-2.47E-05	2.521963835	0.80392158	0	36.6267	977.415	655.7369	3.857	0.6728	249	1.589010916	0.003670615	2.806086644	0.00648206
4.383173606	×ÔÉí³µÁ¾	Road 1	14.34132273	18.42965298	-2.47E-05	2.556424379	0.819607854	0	36.7337	977.417	655.7369	3.8569	0.6728	250	2.146957086	0.004959471	2.842976346	0.006567275
4.399381986	×ÔÉí³µÁ¾	Road 1	14.42493779	18.57151909	-2.47E-05	2.568376064	0.835294127	0	36.8159	977.418	655.7368	3.8575	0.6723	251	1.843831284	0.00425925	2.872861864	0.006636311
4.416193718	×ÔÉí³µÁ¾	Road 1	14.5122483	18.69633923	-2.50E-05	2.585774422	0.843137264	0	36.8884	977.4189	655.7368	3.8578	0.6719	252	1.641026352	0.003790771	2.900450358	0.00670004
4.432712937	×ÔÉí³µÁ¾	Road 1	14.59861787	18.82234383	-2.50E-05	2.613736629	0.843137264	0	36.9613	977.4209	655.7368	3.8572	0.6725	253	1.682991019	0.003887709	2.928252056	0.006764262
4.449336625	×ÔÉí³µÁ¾	Road 1	14.6864614	19.02325974	-2.50E-05	2.655792713	0.850980401	0	37.077	977.4229	655.7368	3.8573	0.6724	254	2.424406762	0.00560038	2.968554638	0.006857361
4.465984872	×ÔÉí³µÁ¾	Road 1	14.7750328	19.1525877	-2.50E-05	2.673820496	0.850980401	0	37.1512	977.4238	655.7368	3.8577	0.672	255	1.730396788	0.003997217	2.997362711	0.006923908
4.482837291	×ÔÉí³µÁ¾	Road 1	14.86529965	19.28273277	-2.50E-05	2.689912796	0.850980401	0	37.2259	977.4248	655.7368	3.8581	0.6716	256	1.73254072	0.004002169	3.026560213	0.006991354
4.499354678	×ÔÉí³µÁ¾	Road 1	14.95441574	19.42304363	-2.50E-05	2.706979752	0.850980401	0	37.3066	977.4258	655.7368	3.8586	0.6711	257	1.871788982	0.004323833	3.057477276	0.007062773
4.515992662	×ÔÉí³µÁ¾	Road 1	15.04522942	19.6495697	-2.50E-05	2.734493494	0.858823538	0	37.4368	977.4287	655.7368	3.858	0.6717	258	2.751480688	0.00635592	3.103256366	0.007168522
4.532671333	×ÔÉí³µÁ¾	Road 1	15.13692619	19.79224606	-2.50E-05	2.748205423	0.858823538	0	37.519	977.4297	655.7368	3.8585	0.6712	259	1.911848885	0.004416371	3.135143466	0.007242181
4.54944311	×ÔÉí³µÁ¾	Road 1	15.22975826	19.92606297	-2.50E-05	2.761258602	0.866666675	0	37.5963	977.4307	655.7368	3.8589	0.6708	260	1.824302858	0.00421414	3.165740266	0.00731286
4.565995319	×ÔÉí³µÁ¾	Road 1	15.32230385	20.12807407	-2.50E-05	2.783135653	0.866666675	0	37.7131	977.4326	655.7368	3.8591	0.6706	261	2.568822907	0.005933981	3.208259961	0.007411081
4.582654563	×ÔÉí³µÁ¾	Road 1	15.41607538	20.26367626	-2.50E-05	2.797282457	0.882352948	0	37.7916	977.4346	655.7368	3.8586	0.6711	262	1.878256416	0.004338772	3.239550293	0.007483361
4.599620614	×ÔÉí³µÁ¾	Road 1	15.51221613	20.39995651	-2.50E-05	2.809764147	0.882352948	0	37.8707	977.4355	655.7368	3.8591	0.6707	263	1.870037834	0.004319787	3.271277451	0.007556651
4.615974517	×ÔÉí³µÁ¾	Road 1	15.60586669	20.61538467	-2.50E-05	2.830242395	0.890196085	0	37.9961	977.4375	655.7368	3.8594	0.6703	264	2.79493081	0.00645629	3.316985477	0.007662236
4.63269351	×ÔÉí³µÁ¾	Road 1	15.70224885	20.75339184	-2.50E-05	2.845929146	0.898039222	0	38.0765	977.4395	655.7368	3.8589	0.6708	265	1.936942502	0.004474337	3.349369204	0.007737043
4.649394907	×ÔÉí³µÁ¾	Road 1	15.79917365	20.89221954	-2.50E-05	2.862731457	0.905882359	0	38.1575	977.4404	655.7368	3.8594	0.6703	266	1.958302144	0.004523678	3.382075587	0.007812595
4.666107669	×ÔÉí³µÁ¾	Road 1	15.89713794	21.10192451	-2.50E-05	2.884005547	0.905882359	0	38.28	977.4424	655.7368	3.8596	0.6701	267	2.74096486	0.006331629	3.427884678	0.007918414
4.68267674	×ÔÉí³µÁ¾	Road 1	15.9949068	21.2424654	-2.50E-05	2.892525673	0.913725495	0	38.3623	977.4443	655.7368	3.8592	0.6705	268	2.017189565	0.004659708	3.461307636	0.007995621
4.699400864	×ÔÉí³µÁ¾	Road 1	16.09457321	21.4539814	-2.50E-05	2.904102325	0.913725495	0	38.4869	977.4463	655.7368	3.8595	0.6702	269	2.800185864	0.006468429	3.508138292	0.008103799
4.74934304	×ÔÉí³µÁ¾	Road 1	16.39739959	21.82874393	-2.50E-05	2.922920942	0.921568632	0	38.7093	977.4502	655.7368	3.8596	0.6701	270	1.873194829	0.00432708	3.601689718	0.008319903
4.766017679	×ÔÉí³µÁ¾	Road 1	16.49987421	22.12393627	-2.50E-05	2.933341026	0.921568632	0	38.8864	977.4531	655.7368	3.8599	0.6698	271	3.834224561	0.008857059	3.665624029	0.008467592
4.78263147	×ÔÉí³µÁ¾	Road 1	16.60263452	22.2668684	-2.50E-05	2.939441919	0.921568632	0	38.9727	977.4541	655.7368	3.8605	0.6692	272	2.123388963	0.004905029	3.700901569	0.008549083
4.799376121	×ÔÉí³µÁ¾	Road 1	16.7069654	22.43051662	-2.50E-05	2.943723679	0.921568632	0	39.072	977.4561	655.7368	3.8604	0.6693	273	2.362017658	0.005456261	3.740452732	0.008640446
4.816023269	×ÔÉí³µÁ¾	Road 1	16.8113514	22.57381268	-2.50E-05	2.943852663	0.921568632	0	39.1595	977.457	655.7368	3.861	0.6687	274	2.14948259	0.004965305	3.776235486	0.008723104
4.832635227	×ÔÉí³µÁ¾	Road 1	16.91655564	22.79895344	-2.50E-05	2.9437325	0.921568632	0	39.2982	977.46	655.7368	3.8606	0.6691	275	3.134447746	0.007240574	3.8283048	0.008843384
4.849297037	×ÔÉí³µÁ¾	Road 1	17.02273886	22.94226151	-2.50E-05	2.945113897	0.921568632	0	39.3871	977.4609	655.7368	3.8612	0.6685	276	2.178401711	0.005032108	3.864600915	0.008927228
4.865957014	×ÔÉí³µÁ¾	Road 1	17.12957396	23.08564854	-2.50E-05	2.946264029	0.921568632	0	39.4766	977.4629	655.7368	3.8609	0.6688	277	2.19130276	0.005061909	3.901107969	0.009011559
4.882608194	×ÔÉí³µÁ¾	Road 1	17.23739453	23.31090431	-2.50E-05	2.943223476	0.921568632	0	39.6184	977.4648	655.7368	3.8615	0.6682	278	3.193369374	0.007376683	3.954281336	0.00913439
4.899373372	×ÔÉí³µÁ¾	Road 1	17.34661998	23.45406647	-2.50E-05	2.940053225	0.921568632	0	39.7094	977.4668	655.7368	3.8612	0.6685	279	2.207955368	0.005100377	3.991298102	0.009219899
4.915995227	×ÔÉí³µÁ¾	Road 1	17.45557215	23.59711361	-2.50E-05	2.938761711	0.921568632	0	39.8009	977.4678	655.7368	3.8618	0.6678	280	2.233191389	0.005158672	4.028417886	0.009305645
4.932619282	×ÔÉí³µÁ¾	Road 1	17.56557619	23.82177887	-2.50E-05	2.937121391	0.921568632	0	39.9458	977.4707	655.7368	3.8615	0.6681	281	3.254347098	0.007517542	4.08251833	0.009430617
4.94946327	×ÔÉí³µÁ¾	Road 1	17.67770389	23.96461658	-2.50E-05	2.93375206	0.921568632	0	40.0387	977.4717	655.7368	3.8622	0.6674	282	2.237387907	0.005168366	4.120204865	0.009517673
4.966024644	×ÔÉí³µÁ¾	Road 1	17.78860646	24.10725517	-2.50E-05	2.929241419	0.929411769	0	40.1322	977.4736	655.7368	3.862	0.6677	283	2.276518994	0.005258759	4.157907146	0.009604766
4.982901622	×ÔÉí³µÁ¾	Road 1	17.90267187	24.33110161	-2.50E-05	2.926971197	0.929411769	0	40.2802	977.4756	655.7368	3.8627	0.6669	284	3.265295964	0.007542834	4.213015475	0.009732066
4.999320038	×ÔÉí³µÁ¾	Road 1	18.01428783	24.47358055	-2.50E-05	2.929010153	0.937254906	0	40.3751	977.4775	655.7368	3.8625	0.6672	285	2.320404175	0.005360134	4.251112838	0.009820071
5.015978549	×ÔÉí³µÁ¾	Road 1	18.12852556	24.68743114	-2.50E-05	2.930730581	0.937254906	0	40.5185	977.4805	655.7368	3.8621	0.6675	286	3.218969304	0.007435819	4.304736073	0.00994394
5.032663085	×ÔÉí³µÁ¾	Road 1	18.24360269	24.83003712	-2.50E-05	2.931325912	0.945098042	0	40.6148	977.4814	655.7368	3.8629	0.6667	287	2.321917532	0.005363629	4.34347619	0.01003343
5.049408837	×ÔÉí³µÁ¾	Road 1	18.35976557	24.972686	-2.50E-05	2.932980776	0.952941179	0	40.7116	977.4834	655.7368	3.8627	0.6669	288	2.327389888	0.005376271	4.382450082	0.01012346
5.065973142	×ÔÉí³µÁ¾	Road 1	18.47565623	25.18707218	-2.50E-05	2.94209218	0.952941179	0	40.8579	977.4854	655.7368	3.8634	0.6662	289	3.301087618	0.007625512	4.437130307	0.010249771
5.08262139	×ÔÉí³µÁ¾	Road 1	18.59279691	25.33038197	-2.50E-05	2.947812796	0.960784316	0	40.9562	977.4873	655.7368	3.8632	0.6664	290	2.376035828	0.005488643	4.476687139	0.010341147
5.099485905	×ÔÉí³µÁ¾	Road 1	18.71232422	25.51501236	-2.50E-05	2.95224452	0.960784316	0	41.0549	977.4893	655.7368	3.863	0.6665	291	2.903720884	0.006707595	4.525656984	0.010454268
5.115977999	×ÔÉí³µÁ¾	Road 1	18.83001231	25.68970871	-2.50E-05	2.958649397	0.960784316	0	41.2042	977.4912	655.7368	3.8638	0.6658	292	2.843503623	0.006568493	4.572552314	0.010562596
5.132623681	×ÔÉí³µÁ¾	Road 1	18.94946275	25.83382359	-2.50E-05	2.963675022	0.968627453	0	41.3044	977.4932	655.7368	3.8636	0.6659	293	2.428436413	0.005609688	4.612975293	0.010655973
5.149370898	×ÔÉí³µÁ¾	Road 1	19.07064983	26.05050659	-2.50E-05	2.971716166	0.968627453	0	41.4557	977.4961	655.7368	3.8634	0.6661	294	3.403305833	0.007861636	4.669971195	0.010787633
5.166872855	×ÔÉí³µÁ¾	Road 1	19.1980021	26.19525146	-2.50E-05	2.975551844	0.968627453	0	41.5573	977.4971	655.7368	3.8643	0.6652	295	2.370768067	0.005476474	4.711464275	0.010883482
5.200926287	×ÔÉí³µÁ¾	Road 1	19.44912242	26.54749031	-2.50E-05	2.98515892	0.97647059	0	41.8064	977.502	655.7368	3.8639	0.6656	296	2.86381968	0.006615423	4.808987166	0.01110876
5.216002742	×ÔÉí³µÁ¾	Road 1	19.56090993	26.6929493	-2.50E-05	2.99100852	0.97647059	0	41.9099	977.5029	655.7367	3.8648	0.6647	297	2.727167227	0.006299756	4.850103178	0.011203738
5.233039172	×ÔÉí³µÁ¾	Road 1	19.68826465	26.91156349	-2.50E-05	2.996260405	0.984313726	0	42.0663	977.5059	655.7368	3.8647	0.6648	298	3.481553993	0.00804239	4.90941643	0.011340752
5.249301802	×ÔÉí³µÁ¾	Road 1	19.81049415	27.05750656	-2.50E-05	2.999410868	0.984313726	0	42.1712	977.5078	655.7368	3.8646	0.6648	299	2.603213177	0.006013422	4.951751523	0.011438546
5.265952982	×ÔÉí³µÁ¾	Road 1	19.93631983	27.20362473	-2.50E-05	3.003475666	0.984313726	0	42.2767	977.5098	655.7368	3.8646	0.6648	300	2.569042178	0.005934487	4.994529106	0.011537362
5.283135668	×ÔÉí³µÁ¾	Road 1	20.06720984	27.42318821	-2.50E-05	3.009401083	0.984313726	0	42.4361	977.5117	655.7367	3.8655	0.6639	301	3.529476262	0.00815309	5.055174989	0.011677454
5.299289064	×ÔÉí³µÁ¾	Road 1	20.19091689	27.56976643	-2.50E-05	3.011331558	0.984313726	0	42.543	977.5137	655.7367	3.8655	0.6639	302	2.670664383	0.006169235	5.098315289	0.011777108
5.315946475	×ÔÉí³µÁ¾	Road 1	20.31916222	27.71638412	-2.50E-05	3.011241198	0.984313726	0	42.6505	977.5156	655.7367	3.8655	0.6639	303	2.618276508	0.006048219	5.141928997	0.011877856
5.332624414	×ÔÉí³µÁ¾	Road 1	20.44863279	27.94674168	-2.50E-05	3.010551214	0.984313726	0	42.8206	977.5186	655.7367	3.8656	0.6637	304	3.8394483	0.008869126	5.205963079	0.012025775
5.349373464	×ÔÉí³µÁ¾	Road 1	20.57933727	28.09330273	-2.50E-05	3.009441137	0.984313726	0	42.9296	977.5205	655.7367	3.8656	0.6637	305	2.637400641	0.006092395	5.250137035	0.012127817
5.365968194	×ÔÉí³µÁ¾	Road 1	20.70984862	28.31265507	-2.50E-05	2.996319294	0.984313726	0	43.0941	977.5234	655.7367	3.8657	0.6637	306	3.741872361	0.008643725	5.312232396	0.012271257
5.382660061	×ÔÉí³µÁ¾	Road 1	20.84179827	28.45809345	-2.50E-05	2.980638266	0.984313726	0	43.2045	977.5254	655.7367	3.8657	0.6636	307	2.658720835	0.006141645	5.356611412	0.012373772
5.399396649	×ÔÉí³µÁ¾	Road 1	20.97477382	28.60272331	-2.50E-05	2.96474576	0.984313726	0	43.3154	977.5264	655.7367	3.8668	0.6626	308	2.653115403	0.006128697	5.401015509	0.012476346
5.415988813	×ÔÉí³µÁ¾	Road 1	21.10759534	28.81827164	-2.50E-05	2.944412947	0.984313726	0	43.4829	977.5293	655.7367	3.8669	0.6625	309	3.747402236	0.008656499	5.463193022	0.012619976
5.432633394	×ÔÉí³µÁ¾	Road 1	21.24149735	28.96121063	-2.50E-05	2.93333149	0.97647059	0	43.5953	977.5313	655.7367	3.8669	0.6624	310	2.669301904	0.006166087	5.507622436	0.012722608
5.449657362	×ÔÉí³µÁ¾	Road 1	21.37946004	29.17449646	-2.50E-05	2.914887667	0.97647059	0	43.7648	977.5342	655.7367	3.8671	0.6622	311	3.67413351	0.008487248	5.570170764	0.012867094
5.465939786	×ÔÉí³µÁ¾	Road 1	21.51205294	29.3159317	-2.50E-05	2.903936148	0.97647059	0	43.8786	977.5361	655.7367	3.8672	0.6621	312	2.723376095	0.006290999	5.614513929	0.012969527
5.483176722	×ÔÉí³µÁ¾	Road 1	21.65309333	29.45682449	-2.50E-05	2.893595934	0.968627453	0	43.9929	977.5381	655.7367	3.8673	0.662	313	2.60491949	0.006017364	5.659414761	0.013073248
5.499339649	×ÔÉí³µÁ¾	Road 1	21.78629032	29.66722298	-2.50E-05	2.87763238	0.960784316	0	44.1653	977.541	655.7367	3.8675	0.6618	314	3.856343288	0.008908153	5.721744555	0.01321723
5.51592998	×ÔÉí³µÁ¾	Road 1	21.92369824	29.8166748	-2.50E-05	2.863741636	0.952941179	0	44.2892	977.543	655.7367	3.8678	0.6615	315	2.847321261	0.006577312	5.768982559	0.01332635
5.53271422	×ÔÉí³µÁ¾	Road 1	22.06335895	29.9553978	-2.50E-05	2.847869396	0.945098042	0	44.4055	977.5449	655.7367	3.8679	0.6613	316	2.667643509	0.006162257	5.813756926	0.013429778
5.550132235	×ÔÉí³µÁ¾	Road 1	22.20929237	30.1618927	-2.50E-05	2.821495771	0.937254906	0	44.5808	977.5479	655.7367	3.8681	0.6611	317	3.614183897	0.008348765	5.876708836	0.013575197
5.565946567	×ÔÉí³µÁ¾	Road 1	22.342432	30.30812073	-2.50E-05	2.80155158	0.929411769	0	44.7068	977.5498	655.7367	3.8685	0.6607	318	2.95176282	0.006818572	5.923388993	0.013683029
5.582643933	×ÔÉí³µÁ¾	Road 1	22.48363412	30.44358215	-2.50E-05	2.780808687	0.905882359	0	44.8249	977.5518	655.7367	3.8686	0.6605	319	2.666437972	0.006159472	5.967911483	0.013785876
5.599466294	×ÔÉí³µÁ¾	Road 1	22.62683198	30.64446716	-2.50E-05	2.739833117	0.890196085	0	45.0031	977.5547	655.7367	3.8689	0.6602	320	3.690444895	0.008524928	6.029993481	0.013929285
5.615968652	×ÔÉí³µÁ¾	Road 1	22.76791092	30.77646103	-2.50E-05	2.706818342	0.866666675	0	45.1225	977.5566	655.7367	3.8691	0.66	321	2.66216304	0.006149597	6.073925448	0.014030768
5.632642192	×ÔÉí³µÁ¾	Road 1	22.91105642	30.90668335	-2.50E-05	2.669073105	0.843137264	0	45.2425	977.5586	655.7366	3.8694	0.6598	322	2.62203265	0.006056895	6.117644013	0.014131758
5.649466752	×ÔÉí³µÁ¾	Road 1	23.05643477	31.10702591	-2.50E-05	2.596884251	0.819607854	0	45.432	977.5625	655.7367	3.8689	0.6603	323	3.732748203	0.008622648	6.180445862	0.01427683
5.666065515	×ÔÉí³µÁ¾	Road 1	23.20047564	31.24010811	-2.50E-05	2.541385174	0.788235307	0	45.5619	977.5645	655.7367	3.8693	0.6598	324	2.702929063	0.006243766	6.225311139	0.014380469
5.683218876	×ÔÉí³µÁ¾	Road 1	23.34982581	31.3443306	-2.50E-05	2.49356842	0.75686276	0	45.6662	977.5664	655.7367	3.8692	0.6599	325	2.186880108	0.005051693	6.262823484	0.014467122
5.69929273	×ÔÉí³µÁ¾	Road 1	23.49060459	31.52968712	-2.50E-05	2.396626472	0.733333349	0	45.8583	977.5693	655.7366	3.8697	0.6593	326	3.678098905	0.008496408	6.321944708	0.014603692
5.715973967	×ÔÉí³µÁ¾	Road 1	23.63723037	31.64350548	-2.50E-05	2.331165791	0.709803939	0	45.9811	977.5713	655.7366	3.87	0.6591	327	2.408631725	0.005563939	6.362123665	0.014696506
5.73268013	×ÔÉí³µÁ¾	Road 1	23.78483867	31.80801544	-2.50E-05	2.233622074	0.701960802	0	46.1662	977.5742	655.7366	3.8704	0.6586	328	3.247251373	0.007501151	6.416372776	0.014821821
5.749314815	×ÔÉí³µÁ¾	Road 1	23.93233824	31.92116089	-2.50E-05	2.169854879	0.694117665	0	46.299	977.5771	655.7366	3.8699	0.6591	329	2.421301845	0.005593207	6.456650369	0.014914862
5.766006316	×ÔÉí³µÁ¾	Road 1	24.0808177	32.02384529	-2.50E-05	2.117105722	0.686274529	0	46.4233	977.5791	655.7366	3.8702	0.6588	330	2.248877975	0.005194908	6.494187517	0.015001573
5.782695251	×ÔÉí³µÁ¾	Road 1	24.22973893	32.12406464	-2.50E-05	2.07177949	0.686274529	0	46.548	977.5811	655.7366	3.8705	0.6585	331	2.214371754	0.005115199	6.531143024	0.01508694
5.799401414	×ÔÉí³µÁ¾	Road 1	24.37930126	32.22908707	-2.50E-05	2.029615402	0.686274529	0	46.6821	977.583	655.7366	3.871	0.658	332	2.298738161	0.005310085	6.569546118	0.015175652
5.815919167	×ÔÉí³µÁ¾	Road 1	24.52789812	32.38628769	-2.50E-05	1.979578495	0.686274529	0	46.8885	977.5869	655.7366	3.8708	0.6582	333	3.209080728	0.007412976	6.622552922	0.015298097
5.832610668	×ÔÉí³µÁ¾	Road 1	24.67849345	32.48019333	-2.50E-05	1.956305265	0.686274529	0	47.0146	977.5889	655.7366	3.8711	0.6579	334	2.129507376	0.004919162	6.658097596	0.015380205
5.84929667	×ÔÉí³µÁ¾	Road 1	24.82946942	32.57302094	-2.50E-05	1.937302589	0.686274529	0	47.1411	977.5908	655.7366	3.8714	0.6575	335	2.117129239	0.004890569	6.69342402	0.015461809
5.865944184	×ÔÉí³µÁ¾	Road 1	24.9805527	32.67153397	-2.50E-05	1.921298385	0.686274529	0	47.277	977.5928	655.7366	3.8719	0.657	336	2.22240209	0.005133749	6.73042149	0.015547274
5.882597197	×ÔÉí³µÁ¾	Road 1	25.13219804	32.78224869	-2.50E-05	1.906538129	0.686274529	0	47.4316	977.5957	655.7366	3.8718	0.6571	337	2.43528688	0.005625513	6.770976353	0.015640955
5.899341848	×ÔÉí³µÁ¾	Road 1	25.28530885	32.91790924	-2.50E-05	1.891516089	0.686274529	0	47.6232	977.5986	655.7366	3.8723	0.6566	338	2.856023274	0.006597414	6.818799467	0.015751427
5.9159758	×ÔÉí³µÁ¾	Road 1	25.43782262	33.00776711	-2.50E-05	1.882929087	0.686274529	0	47.7514	977.6006	655.7366	3.8727	0.6562	339	2.095584134	0.004840799	6.853657312	0.015831948
5.93265887	×ÔÉí³µÁ¾	Road 1	25.59123107	33.10364342	-2.50E-05	1.876234055	0.686274529	0	47.8891	977.6035	655.7366	3.8723	0.6566	340	2.199176555	0.005080098	6.890346328	0.0159167
5.949287323	×ÔÉí³µÁ¾	Road 1	25.74484289	33.25640488	-2.50E-05	1.868060708	0.686274529	0	48.1103	977.6074	655.7366	3.8723	0.6565	341	3.192878637	0.00737555	6.943438961	0.016039344
5.965985422	×ÔÉí³µÁ¾	Road 1	25.89950983	33.34517097	-2.50E-05	1.862842083	0.686274529	0	48.2398	977.6094	655.7366	3.8727	0.6561	342	2.089197037	0.004826045	6.97832458	0.01611993
5.982592615	×ÔÉí³µÁ¾	Road 1	26.05374318	33.43371048	-2.50E-05	1.859891653	0.686274529	0	48.3696	977.6113	655.7366	3.8731	0.6557	343	2.098417843	0.004847345	7.01317341	0.016200431
5.999329935	×ÔÉí³µÁ¾	Road 1	26.2096253	33.52840233	-2.50E-05	1.855999112	0.686274529	0	48.5091	977.6133	655.7366	3.8737	0.6551	344	2.197739377	0.005076778	7.049957678	0.016285402
6.015986247	×ÔÉí³µÁ¾	Road 1	26.36542332	33.67329483	-2.50E-05	1.8521806	0.686274529	0	48.7238	977.6172	655.7366	3.8737	0.6551	345	3.087885948	0.007133017	7.101390468	0.016404212
6.049358985	×ÔÉí³µÁ¾	Road 1	26.67880537	33.805299	-2.50E-05	1.848230004	0.686274529	0	48.9206	977.6201	655.7366	3.8743	0.6545	346	1.716236884	0.003964507	7.158665992	0.016536518
6.065916326	×ÔÉí³µÁ¾	Road 1	26.83494831	33.94956665	-2.50E-05	1.845459461	0.686274529	0	49.137	977.624	655.7366	3.8743	0.6544	347	3.115001818	0.007195654	7.21024214	0.016655659
6.082662077	×ÔÉí³µÁ¾	Road 1	26.99353821	34.09364204	-2.50E-05	1.843437195	0.686274529	0	49.3544	977.6279	655.7366	3.8743	0.6544	348	3.094779411	0.00714894	7.262066546	0.016775374
6.099432021	×ÔÉí³µÁ¾	Road 1	27.15276531	34.18124428	-2.50E-05	1.841826916	0.686274529	0	49.4871	977.6299	655.7366	3.8748	0.6539	349	2.106942635	0.004867037	7.297399856	0.016856994
6.115921916	×ÔÉí³µÁ¾	Road 1	27.30973435	34.26877785	-2.50E-05	1.840168715	0.686274529	0	49.6202	977.6318	655.7366	3.8752	0.6535	350	2.136584519	0.00493551	7.33263191	0.01693838
6.132645674	×ÔÉí³µÁ¾	Road 1	27.46956782	34.40617218	-2.50E-05	1.838566542	0.686274529	0	49.83	977.6357	655.7366	3.8751	0.6536	351	3.005506037	0.006942719	7.382895265	0.017054488
6.149345972	×ÔÉí³µÁ¾	Road 1	27.62958241	34.49354782	-2.50E-05	1.837646246	0.686274529	0	49.964	977.6377	655.7366	3.8756	0.6531	352	2.125921498	0.004910879	7.418398788	0.017136501
6.165983589	×ÔÉí³µÁ¾	Road 1	27.78960166	34.62450829	-2.50E-05	1.835965991	0.686274529	0	50.1656	977.6416	655.7366	3.8754	0.6534	353	2.920144713	0.006745534	7.466983038	0.017248731
6.182613142	×ÔÉí³µÁ¾	Road 1	27.94994634	34.7117466	-2.50E-05	1.834867954	0.686274529	0	50.3004	977.6436	655.7366	3.8759	0.6529	354	2.141681818	0.004947285	7.502598249	0.017331002
6.1993369	×ÔÉí³µÁ¾	Road 1	28.11160426	34.79890938	-2.50E-05	1.833577871	0.686274529	0	50.4356	977.6455	655.7366	3.8764	0.6524	355	2.13608086	0.004934347	7.538321548	0.017413523
6.215991745	×ÔÉí³µÁ¾	Road 1	28.27320062	34.92958832	-2.50E-05	1.832265377	0.686274529	0	50.6389	977.6494	655.7366	3.8762	0.6526	356	2.935733706	0.006781545	7.587215738	0.017526468
6.232600771	×ÔÉí³µÁ¾	Road 1	28.4347541	35.01665497	-2.50E-05	1.831795454	0.686274529	0	50.7749	977.6514	655.7366	3.8767	0.652	357	2.156716246	0.004982015	7.623036694	0.017609215
6.249313532	×ÔÉí³µÁ¾	Road 1	28.59772062	35.10368385	-2.50E-05	1.831135154	0.686274529	0	50.9113	977.6533	655.7365	3.8772	0.6515	358	2.150793388	0.004968333	7.65898239	0.017692249
6.265990004	×ÔÉí³µÁ¾	Road 1	28.76093761	35.23413963	-2.50E-05	1.829407096	0.686274529	0	51.1164	977.6572	655.7365	3.877	0.6517	359	2.951601182	0.006818199	7.708204685	0.017805953
6.28266611	×ÔÉí³µÁ¾	Road 1	28.92458231	35.32724876	-2.50E-05	1.828514934	0.686274529	0	51.2634	977.6592	655.7365	3.8778	0.6509	360	2.277113284	0.005260132	7.746178066	0.017893671
6.299296029	×ÔÉí³µÁ¾	Road 1	29.08817514	35.41413345	-2.50E-05	1.828044772	0.686274529	0	51.4009	977.6621	655.7365	3.8773	0.6514	361	2.172460758	0.005018384	7.782305913	0.017977127
6.315905788	×ÔÉí³µÁ¾	Road 1	29.25219915	35.55057335	-2.50E-05	1.827084541	0.686274529	0	51.6178	977.666	655.7365	3.8774	0.6513	362	3.09536133	0.007150285	7.833719118	0.018095891
6.332600954	×ÔÉí³µÁ¾	Road 1	29.41746898	35.63734474	-2.50E-05	1.826204419	0.686274529	0	51.7562	977.668	655.7365	3.8779	0.6508	363	2.175909383	0.005026351	7.870046288	0.018179807
6.349307117	×ÔÉí³µÁ¾	Road 1	29.58325017	35.72407837	-2.50E-05	1.825314283	0.686274529	0	51.8949	977.6699	655.7365	3.8785	0.6502	364	2.178728567	0.005032863	7.906444482	0.018263887
6.366019512	×ÔÉí³µÁ¾	Road 1	29.74969676	35.85409126	-2.50E-05	1.824364185	0.686274529	0	52.1037	977.6738	655.7365	3.8784	0.6503	365	2.984952331	0.00689524	7.956330184	0.018379123
6.382667759	×ÔÉí³µÁ¾	Road 1	29.91590512	35.94072533	-2.50E-05	1.823484063	0.686274529	0	52.2433	977.6758	655.7365	3.879	0.6498	366	2.193883725	0.005067871	7.992854502	0.018463494
6.399311974	×ÔÉí³µÁ¾	Road 1	30.08250219	36.0335083	-2.50E-05	1.822993994	0.686274529	0	52.3932	977.6787	655.7365	3.8788	0.65	367	2.313925075	0.005345167	8.031367969	0.01855246
6.415927231	×ÔÉí³µÁ¾	Road 1	30.2494086	36.16333237	-2.50E-05	1.821635842	0.686274529	0	52.6038	977.6816	655.7365	3.8797	0.6492	368	3.018796934	0.006973421	8.081526056	0.018668325
6.449299969	×ÔÉí³µÁ¾	Road 1	30.58585191	36.29297447	-2.50E-05	1.81810534	0.686274529	0	52.8151	977.6855	655.7365	3.8796	0.6493	369	1.798502366	0.00415454	8.141547005	0.018806974
6.465920358	×ÔÉí³µÁ¾	Road 1	30.75423237	36.47144737	-2.50E-05	1.811382294	0.686274529	0	53.1082	977.6904	655.7365	3.88	0.6489	370	3.959906005	0.009147383	8.207362183	0.018959007
6.48259793	×ÔÉí³µÁ¾	Road 1	30.9235901	36.55735016	-2.50E-05	1.808033824	0.686274529	0	53.2502	977.6924	655.7365	3.8807	0.6483	371	2.209702585	0.005104413	8.244214656	0.019044136
6.499344048	×ÔÉí³µÁ¾	Road 1	31.09424237	36.68600693	-2.50E-05	1.807071567	0.686274529	0	53.4638	977.6963	655.7365	3.8806	0.6484	372	3.01681038	0.006968832	8.294734518	0.019160837
6.516005858	×ÔÉí³µÁ¾	Road 1	31.26446019	36.7777668	-2.50E-05	1.804001093	0.686274529	0	53.6168	977.6992	655.7365	3.8805	0.6486	373	2.334232278	0.005392077	8.333627052	0.019250678
6.532560633	×ÔÉí³µÁ¾	Road 1	31.43397814	36.86335716	-2.50E-05	1.803513169	0.686274529	0	53.76	977.7012	655.7365	3.8811	0.648	374	2.231863125	0.005155604	8.370575045	0.019336028
6.549272294	×ÔÉí³µÁ¾	Road 1	31.60549983	36.94893379	-2.50E-05	1.803000927	0.686274529	0	53.9035	977.7041	655.7365	3.8808	0.6483	375	2.220610263	0.00512961	8.407685132	0.019421753
6.565984689	×ÔÉí³µÁ¾	Road 1	31.777653	37.08334122	-2.50E-05	1.802363038	0.686274529	0	54.1297	977.707	655.7365	3.882	0.6472	376	3.161123352	0.007302195	8.460515072	0.01954379
6.582632203	×ÔÉí³µÁ¾	Road 1	31.94953347	37.16889381	-2.50E-05	1.802990913	0.686274529	0	54.2741	977.71	655.7365	3.8817	0.6476	377	2.237923224	0.005169603	8.497770931	0.019629851
6.599296945	×ÔÉí³µÁ¾	Road 1	32.12198784	37.25444641	-2.50E-05	1.802770972	0.686274529	0	54.4188	977.7119	655.7365	3.8823	0.6469	378	2.240679661	0.00517597	8.53511128	0.019716107
6.615985514	×ÔÉí³µÁ¾	Road 1	32.29531198	37.3888813	-2.50E-05	1.802940965	0.686274529	0	54.6469	977.7158	655.7365	3.8826	0.6468	379	3.18896864	0.007366518	8.588330601	0.019839044
6.632620198	×ÔÉí³µÁ¾	Road 1	32.46847191	37.4744545	-2.50E-05	1.803551078	0.686274529	0	54.7924	977.7188	655.7365	3.8823	0.6471	380	2.255552507	0.005210326	8.625851006	0.019925716
6.649313899	×ÔÉí³µÁ¾	Road 1	32.64264297	37.56002769	-2.50E-05	1.803372979	0.686274529	0	54.9383	977.7207	655.7365	3.883	0.6464	381	2.254126052	0.005207031	8.66348071	0.02001264
6.665967644	×ÔÉí³µÁ¾	Road 1	32.81701935	37.69452095	-2.50E-05	1.803951025	0.694117665	0	55.1682	977.7246	655.7365	3.8833	0.6462	382	3.219237899	0.00743644	8.717093079	0.020136485
6.682643016	×ÔÉí³µÁ¾	Road 1	32.99201927	37.78024864	-2.50E-05	1.807803631	0.694117665	0	55.315	977.7275	655.7365	3.8831	0.6464	383	2.27045004	0.00524474	8.754953679	0.020223943
6.699298961	×ÔÉí³µÁ¾	Road 1	33.16721267	37.86613426	-2.50E-05	1.811344147	0.694117665	0	55.4621	977.7295	655.7365	3.8838	0.6457	384	2.2799896	0.005266776	8.79292906	0.020311666
6.715928881	×ÔÉí³µÁ¾	Road 1	33.34275759	38.00148926	-2.50E-05	1.817692876	0.694117665	0	55.6939	977.7334	655.7365	3.8841	0.6454	385	3.263799522	0.007539377	8.847205783	0.020437045
6.749290989	×ÔÉí³µÁ¾	Road 1	33.69595653	38.11258507	-2.50E-05	1.821953416	0.694117665	0	55.8841	977.7363	655.7365	3.8846	0.6448	386	1.69162808	0.003907661	8.903642062	0.020567413
6.765920542	×ÔÉí³µÁ¾	Road 1	33.87292532	38.310569	-2.50E-05	1.826083899	0.694117665	0	56.2238	977.7422	655.7365	3.885	0.6445	387	4.52946274	0.010463059	8.978965002	0.020741409
6.782573921	×ÔÉí³µÁ¾	Road 1	34.05054903	38.39733353	-2.50E-05	1.828024149	0.694117665	0	56.3729	977.7451	655.7365	3.8848	0.6447	388	2.325529139	0.005371972	9.01769292	0.020830871
6.799286315	×ÔÉí³µÁ¾	Road 1	34.22920515	38.48413582	-2.50E-05	1.828394294	0.694117665	0	56.5224	977.7471	655.7364	3.8855	0.6439	389	2.324750531	0.005370174	9.056545068	0.020920619
6.815961321	×ÔÉí³µÁ¾	Road 1	34.40809364	38.62058945	-2.50E-05	1.828546405	0.694117665	0	56.758	977.751	655.7364	3.8859	0.6435	390	3.326741815	0.007684774	9.112018507	0.021048763
6.832631195	×ÔÉí³µÁ¾	Road 1	34.58732935	38.70746384	-2.50E-05	1.83007431	0.694117665	0	56.9083	977.7539	655.7364	3.8857	0.6437	391	2.342381912	0.005410902	9.151065719	0.021138962
6.849259648	×ÔÉí³µÁ¾	Road 1	34.76652102	38.79434853	-2.50E-05	1.830244541	0.694117665	0	57.059	977.7559	655.7364	3.8865	0.6429	392	2.351525249	0.005432023	9.190167946	0.021229288
6.865895066	×ÔÉí³µÁ¾	Road 1	34.94641863	38.93087769	-2.50E-05	1.829956532	0.694117665	0	57.2965	977.7607	655.7364	3.886	0.6435	393	3.359160708	0.007759661	9.246048988	0.021358373
6.882607461	×ÔÉí³µÁ¾	Road 1	35.12755205	39.01776581	-2.50E-05	1.830214262	0.694117665	0	57.4481	977.7627	655.7364	3.8868	0.6427	394	2.354581078	0.005439082	9.285399676	0.021449273
6.899266704	×ÔÉí³µÁ¾	Road 1	35.30851153	39.10466423	-2.50E-05	1.830054402	0.694117665	0	57.6	977.7656	655.7364	3.8866	0.6428	395	2.364969057	0.005463079	9.324798272	0.021540284
6.91596627	×ÔÉí³µÁ¾	Road 1	35.49054244	39.24121742	-2.50E-05	1.830134273	0.694117665	0	57.8393	977.7695	655.7364	3.8871	0.6424	396	3.373399459	0.007792553	9.381132576	0.021670416
6.932550369	×ÔÉí³µÁ¾	Road 1	35.67171494	39.32809181	-2.50E-05	1.830416441	0.694117665	0	57.9921	977.7715	655.7364	3.8879	0.6415	397	2.384311252	0.005507759	9.420674232	0.021761757
6.949318847	×ÔÉí³µÁ¾	Road 1	35.85530648	39.41500053	-2.50E-05	1.830954432	0.694117665	0	58.1452	977.7744	655.7364	3.8878	0.6417	398	2.370019514	0.005474745	9.460415851	0.021853561
6.965920542	×ÔÉí³µÁ¾	Road 1	36.03770188	39.55159149	-2.50E-05	1.830706596	0.694117665	0	58.3865	977.7783	655.7363	3.8883	0.6412	399	3.414969546	0.00788858	9.517110133	0.021984524
6.982550094	×ÔÉí³µÁ¾	Road 1	36.2208049	39.63852081	-2.50E-05	1.831084371	0.694117665	0	58.5405	977.7813	655.7364	3.8881	0.6413	400	2.397008644	0.00553709	9.556971315	0.022076604
6.99932627	×ÔÉí³µÁ¾	Road 1	36.40592739	39.72543983	-2.50E-05	1.831324339	0.694117665	0	58.6948	977.7832	655.7363	3.889	0.6404	401	2.385733447	0.005511044	9.596994797	0.022169058
7.015896807	×ÔÉí³µÁ¾	Road 1	36.5894096	39.86207199	-2.50E-05	1.831804395	0.694117665	0	58.9379	977.7881	655.7363	3.8885	0.6409	402	3.445633876	0.007959414	9.654090802	0.02230095
7.032562649	×ÔÉí³µÁ¾	Road 1	36.77434962	39.94902191	-2.50E-05	1.831794381	0.694117665	0	59.0931	977.79	655.7363	3.8894	0.64	403	2.409950983	0.005566987	9.694254664	0.022393728
7.050343555	×ÔÉí³µÁ¾	Road 1	36.97233828	40.08565063	-2.53E-05	1.831504345	0.694117665	0	59.3377	977.7939	655.7363	3.8899	0.6394	404	3.269130765	0.007551692	9.75238277	0.022528004
7.06593832	×ÔÉí³µÁ¾	Road 1	37.14636117	40.17261086	-2.53E-05	1.832116604	0.694117665	0	59.4937	977.7969	655.7363	3.8898	0.6395	405	2.546267082	0.005881877	9.792091206	0.022619731
7.101418022	×ÔÉí³µÁ¾	Road 1	37.54454655	40.40246201	-2.53E-05	1.832004428	0.694117665	0	59.9077	977.8037	655.7363	3.8904	0.6388	406	2.869780887	0.006629194	9.893910179	0.022854933
7.116561923	×ÔÉí³µÁ¾	Road 1	37.7148971	40.49564323	-2.53E-05	1.832614541	0.694117665	0	60.0763	977.8066	655.7363	3.8905	0.6387	407	2.765825665	0.006389057	9.935795569	0.022951688
7.132599488	×ÔÉí³µÁ¾	Road 1	37.89568782	40.58263092	-2.53E-05	1.833214521	0.694117665	0	60.2339	977.8096	655.7363	3.8905	0.6387	408	2.515875787	0.005811673	9.97614409	0.023044893
7.14927596	×ÔÉí³µÁ¾	Road 1	38.08411274	40.67585335	-2.53E-05	1.833364606	0.694117665	0	60.4032	977.8125	655.7363	3.8906	0.6386	409	2.579131234	0.005957793	10.0191549	0.023144248
7.166549185	×ÔÉí³µÁ¾	Road 1	38.27990635	40.80633316	-2.53E-05	1.83307445	0.694117665	0	60.6408	977.8164	655.7363	3.891	0.6382	410	3.276978049	0.007569819	10.07575888	0.023275003
7.215903405	×ÔÉí³µÁ¾	Road 1	38.8423235	41.02388306	-2.53E-05	1.833804488	0.694117665	0	61.0386	977.8223	655.7363	3.8923	0.6368	411	2.177662597	0.005030401	10.18323572	0.023523275
7.232612867	×ÔÉí³µÁ¾	Road 1	39.03357331	41.2041584	-2.53E-05	1.834184647	0.694117665	0	61.3698	977.8281	655.7363	3.8924	0.6367	412	4.453812341	0.010288307	10.25765653	0.023695187
7.24931903	×ÔÉí³µÁ¾	Road 1	39.22518928	41.29119759	-2.53E-05	1.834236622	0.694117665	0	61.5302	977.8311	655.7363	3.8924	0.6367	413	2.478319327	0.005724918	10.29905973	0.023790828
7.265899465	×ÔÉí³µÁ¾	Road 1	39.41576407	41.37824364	-2.53E-05	1.834434509	0.694117665	0	61.6909	977.834	655.7363	3.8924	0.6368	414	2.497175884	0.005768476	10.34046399	0.023886472
7.282591699	×ÔÉí³µÁ¾	Road 1	39.60828691	41.52123756	-2.53E-05	1.834716678	0.694117665	0	61.9557	977.8379	655.7363	3.8932	0.6359	415	3.69152662	0.008527426	10.40208382	0.024028814
7.299281	×ÔÉí³µÁ¾	Road 1	39.80117954	41.60830078	-2.53E-05	1.834884524	0.694117665	0	62.1173	977.8408	655.7363	3.8932	0.6359	416	2.497470642	0.005769157	10.44376486	0.024125097
7.317352585	×ÔÉí³µÁ¾	Road 1	40.01070403	41.73890419	-2.53E-05	1.835354567	0.694117665	0	62.3604	977.8447	655.7363	3.8937	0.6354	417	3.227385228	0.00745526	10.50208883	0.024259825
7.332634677	×ÔÉí³µÁ¾	Road 1	40.18825636	41.82597427	-2.53E-05	1.834766746	0.694117665	0	62.5229	977.8477	655.7363	3.8937	0.6354	418	2.682590983	0.006196785	10.54308443	0.024354525
7.349274494	×ÔÉí³µÁ¾	Road 1	40.38198566	41.91305122	-2.53E-05	1.83537674	0.694117665	0	62.6857	977.8496	655.7363	3.8947	0.6344	419	2.519491693	0.005820026	10.58500831	0.024451369
7.365884253	×ÔÉí³µÁ¾	Road 1	40.57596779	42.04369583	-2.53E-05	1.835864544	0.694117665	0	62.9306	977.8545	655.7363	3.8942	0.6349	420	3.480433684	0.008039802	10.64281747	0.024584908
7.382553027	×ÔÉí³µÁ¾	Road 1	40.77104241	42.13078995	-2.53E-05	1.835674524	0.694117665	0	63.0942	977.8564	655.7363	3.8952	0.6339	421	2.528099781	0.00583991	10.6849578	0.024682253
7.399218136	×ÔÉí³µÁ¾	Road 1	40.96647733	42.21789093	-2.53E-05	1.835876703	0.694117665	0	63.2582	977.8594	655.7363	3.8953	0.6338	422	2.533279094	0.005851875	10.72717517	0.024779775
7.415935296	×ÔÉí³µÁ¾	Road 1	41.16312946	42.34855957	-2.53E-05	1.836356759	0.694117665	0	63.5049	977.8633	655.7362	3.8958	0.6333	423	3.485586835	0.008051706	10.78544428	0.024914376
7.432608835	×ÔÉí³µÁ¾	Road 1	41.35967194	42.43567772	-2.53E-05	1.835774541	0.694117665	0	63.6697	977.8662	655.7362	3.8959	0.6332	424	2.544218532	0.005877145	10.82786541	0.025012369
7.450086965	×ÔÉí³µÁ¾	Road 1	41.56636333	42.57257423	-2.53E-05	1.836274624	0.694117665	0	63.9294	977.8711	655.7362	3.8957	0.6334	425	3.508131069	0.008103783	10.88918098	0.025154008
7.467021126	×ÔÉí³µÁ¾	Road 1	41.76706104	42.66593056	-2.53E-05	1.836456776	0.694117665	0	64.107	977.874	655.7362	3.896	0.6332	426	2.662326998	0.006149975	10.93426526	0.025258153
7.482698366	×ÔÉí³µÁ¾	Road 1	41.95324158	42.75305901	-2.53E-05	1.83645463	0.694117665	0	64.2731	977.877	655.7362	3.896	0.6331	427	2.683817413	0.006199618	10.97634011	0.025355346
7.499280267	×ÔÉí³µÁ¾	Road 1	42.15062434	42.8526226	-2.53E-05	1.836256623	0.694117665	0	64.4633	977.8799	655.7362	3.8966	0.6326	428	2.854315234	0.006593468	11.02367008	0.025464678
7.515906887	×ÔÉí³µÁ¾	Road 1	42.34894176	42.93973732	-2.53E-05	1.83627665	0.694117665	0	64.6301	977.8828	655.7362	3.8967	0.6325	429	2.576288574	0.005951227	11.06650505	0.025563627
7.532589591	×ÔÉí³µÁ¾	Road 1	42.5485625	43.0766304	-2.53E-05	1.835964561	0.694117665	0	64.8929	977.8867	655.7362	3.8975	0.6317	430	3.684895471	0.008512109	11.12797907	0.025705632
7.549308583	×ÔÉí³µÁ¾	Road 1	42.74902188	43.16371078	-2.53E-05	1.835416436	0.694117665	0	65.0606	977.8896	655.7362	3.8977	0.6315	431	2.576620249	0.005951993	11.17105756	0.025805143
7.56660197	×ÔÉí³µÁ¾	Road 1	42.95699553	43.29430733	-2.53E-05	1.835564375	0.694117665	0	65.3128	977.8936	655.7362	3.8983	0.6309	432	3.457972924	0.007987917	11.23085762	0.025943281
7.58261974	×ÔÉí³µÁ¾	Road 1	43.15004342	43.38758469	-2.53E-05	1.835376501	0.694117665	0	65.4933	977.8965	655.7362	3.8987	0.6306	433	2.818609216	0.006510987	11.27600546	0.026047573
7.615946659	×ÔÉí³µÁ¾	Road 1	43.55360223	43.59274063	-2.53E-05	1.834546447	0.694117665	0	65.892	977.9033	655.7362	3.8991	0.6302	434	2.952679809	0.00682069	11.37440918	0.026274885
7.632594539	×ÔÉí³µÁ¾	Road 1	43.75559538	43.67975578	-2.53E-05	1.834774137	0.694117665	0	66.0617	977.9063	655.7362	3.8992	0.6301	435	2.610775589	0.006030892	11.41787306	0.026375287
7.649272478	×ÔÉí³µÁ¾	Road 1	43.95835634	43.7667675	-2.53E-05	1.834596276	0.694117665	0	66.2317	977.9092	655.7362	3.8994	0.6299	436	2.611745578	0.006033132	11.46143159	0.026475907
7.66587014	×ÔÉí³µÁ¾	Road 1	44.16077165	43.90347862	-2.53E-05	1.834314108	0.694117665	0	66.4995	977.9141	655.7362	3.8994	0.63	437	3.761741431	0.008689623	11.52386771	0.026620134
7.682614792	×ÔÉí³µÁ¾	Road 1	44.36538406	43.99044571	-2.53E-05	1.833724022	0.694117665	0	66.6704	977.916	655.7362	3.9005	0.6288	438	2.614664619	0.006039875	11.56764935	0.02672127
7.699270003	×ÔÉí³µÁ¾	Road 1	44.56930583	44.07739563	-2.53E-05	1.833323836	0.694117665	0	66.8417	977.9189	655.7362	3.9007	0.6287	439	2.629465248	0.006074065	11.61144365	0.026822435
7.715942443	×ÔÉí³µÁ¾	Road 1	44.77407132	44.21403122	-2.53E-05	1.833676219	0.694117665	0	67.1114	977.9238	655.7362	3.9007	0.6287	440	3.770443075	0.008709724	11.67430614	0.026967647
7.732589591	×ÔÉí³µÁ¾	Road 1	44.97892813	44.30095367	-2.53E-05	1.833123922	0.694117665	0	67.2835	977.9268	655.7361	3.9009	0.6285	441	2.641626956	0.006102158	11.71828169	0.027069231
7.74923234	×ÔÉí³µÁ¾	Road 1	45.18413262	44.38786926	-2.53E-05	1.833263874	0.701960802	0	67.456	977.9297	655.7361	3.9011	0.6283	442	2.646595828	0.006113636	11.76232832	0.027170978
7.765956464	×ÔÉí³µÁ¾	Road 1	45.39097584	44.52463875	-2.53E-05	1.837836623	0.701960802	0	67.7276	977.9336	655.7361	3.9022	0.6273	443	3.788198067	0.008750738	11.82568262	0.027317327
7.78257502	×ÔÉí³µÁ¾	Road 1	45.59691616	44.61188736	-2.53E-05	1.84128499	0.701960802	0	67.9009	977.9365	655.7361	3.9024	0.6271	444	2.669087563	0.006165592	11.870039	0.02741979
7.799312707	×ÔÉí³µÁ¾	Road 1	45.80473918	44.69929733	-2.53E-05	1.844365358	0.701960802	0	68.0746	977.9395	655.7361	3.9026	0.6269	445	2.663029498	0.006151598	11.91461195	0.027522754
7.815905238	×ÔÉí³µÁ¾	Road 1	46.01139449	44.83699036	-2.53E-05	1.848285794	0.701960802	0	68.3481	977.9443	655.7361	3.9027	0.6268	446	3.859296777	0.008914976	11.97864745	0.027670676
7.832520129	×ÔÉí³µÁ¾	Road 1	46.21873352	44.92479172	-2.53E-05	1.851916313	0.709803939	0	68.5227	977.9473	655.7361	3.9029	0.6266	447	2.699058188	0.006234824	12.02349201	0.027774267
7.849303635	×ÔÉí³µÁ¾	Road 1	46.42858685	45.01276131	-2.53E-05	1.856176853	0.709803939	0	68.6975	977.9502	655.7361	3.9032	0.6264	448	2.687019184	0.006207014	12.06858962	0.027878442
7.865913394	×ÔÉí³µÁ¾	Road 1	46.63690769	45.15147057	-2.53E-05	1.863980174	0.709803939	0	68.973	977.9551	655.7361	3.9033	0.6263	449	3.904742733	0.009019956	12.13344645	0.028028261
7.882902538	×ÔÉí³µÁ¾	Road 1	46.85055429	45.27171936	-2.53E-05	1.8693887	0.709803939	0	69.2116	977.959	655.7361	3.9037	0.6259	450	3.417603244	0.007894663	12.19150861	0.028162385
7.899221985	×ÔÉí³µÁ¾	Road 1	47.05618164	45.36051292	-2.53E-05	1.872141242	0.709803939	0	69.3878	977.9619	655.7361	3.904	0.6256	451	2.783599478	0.006430115	12.23693541	0.028267321
7.915975433	×ÔÉí³µÁ¾	Road 1	47.26769141	45.44945755	-2.53E-05	1.875691652	0.717647076	0	69.5644	977.9648	655.7361	3.9043	0.6254	452	2.736700971	0.006321779	12.28278459	0.028373232
7.932543771	×ÔÉí³µÁ¾	Road 1	47.47727435	45.5385807	-2.53E-05	1.879070044	0.717647076	0	69.7413	977.9678	655.7361	3.9046	0.6251	453	2.769035835	0.006396473	12.32866291	0.028479211
7.949246635	×ÔÉí³µÁ¾	Road 1	47.68924048	45.68546104	-2.53E-05	1.887311101	0.725490212	0	70.0327	977.9727	655.7361	3.905	0.6247	454	4.12162268	0.009520948	12.39750581	0.028638238
7.965979924	×ÔÉí³µÁ¾	Road 1	47.90201019	45.77528114	-2.53E-05	1.894864202	0.725490212	0	70.2105	977.9756	655.7361	3.9053	0.6244	455	2.77736851	0.006415721	12.44398032	0.028745595
7.982579786	×ÔÉí³µÁ¾	Road 1	48.11352892	45.87191277	-2.53E-05	1.902283192	0.725490212	0	70.4014	977.9785	655.7361	3.9058	0.6239	456	2.96202605	0.00684228	12.49314954	0.028859175
7.999217403	×ÔÉí³µÁ¾	Road 1	48.32615693	46.00784111	-2.53E-05	1.911436558	0.725490212	0	70.6694	977.9834	655.7361	3.9058	0.6239	457	3.90139739	0.009012228	12.5580595	0.029009117
8.015898273	×ÔÉí³µÁ¾	Road 1	48.53975918	46.09879761	-2.53E-05	1.915927172	0.725490212	0	70.8485	977.9863	655.7361	3.9061	0.6236	458	2.828692289	0.006534279	12.60524455	0.029118115
8.032599671	×ÔÉí³µÁ¾	Road 1	48.75410754	46.20296516	-2.53E-05	1.91970551	0.725490212	0	71.0536	977.9893	655.7361	3.9069	0.6228	459	3.146911309	0.007269365	12.65780237	0.029239523
8.049288606	×ÔÉí³µÁ¾	Road 1	48.96871923	46.29427185	-2.53E-05	1.922067881	0.725490212	0	71.2334	977.9922	655.7361	3.9073	0.6225	460	2.846749142	0.006575991	12.70531158	0.02934927
8.065854012	×ÔÉí³µÁ¾	Road 1	49.18240354	46.43795242	-2.53E-05	1.924666166	0.725490212	0	71.5168	977.9971	655.7361	3.9075	0.6222	461	4.136623153	0.009555599	12.77383642	0.029507562
8.082558342	×ÔÉí³µÁ¾	Road 1	49.39830438	46.5294342	-2.53E-05	1.924788237	0.725490212	0	71.6975	978	655.7361	3.9079	0.6218	462	2.861877917	0.006610938	12.82164217	0.029617993
8.099267438	×ÔÉí³µÁ¾	Road 1	49.61469142	46.62091599	-2.53E-05	1.924916148	0.725490212	0	71.8786	978.0029	655.7361	3.9082	0.6215	463	2.866290453	0.006621131	12.86953529	0.029728627
8.115899923	×ÔÉí³µÁ¾	Road 1	49.83075081	46.76473732	-2.53E-05	1.926138401	0.733333349	0	72.164	978.0078	655.7361	3.9085	0.6212	464	4.152953773	0.009593323	12.93860924	0.029888187
8.132521045	×ÔÉí³µÁ¾	Road 1	50.04708555	46.85634613	-2.53E-05	1.928446651	0.733333349	0	72.346	978.0107	655.7361	3.9089	0.6208	465	2.894072323	0.006685307	12.98671197	0.029999305
8.149273761	×ÔÉí³µÁ¾	Road 1	50.265774	46.99407692	-2.53E-05	1.934587479	0.733333349	0	72.6197	978.0156	655.736	3.909	0.6207	466	3.999505507	0.009238858	13.05371454	0.030154081
8.165912844	×ÔÉí³µÁ¾	Road 1	50.48340462	47.08614235	-2.53E-05	1.937797904	0.733333349	0	72.8026	978.0186	655.736	3.9094	0.6203	467	2.915531514	0.006734878	13.10222632	0.030266143
8.18254423	×ÔÉí³µÁ¾	Road 1	50.70136049	47.17833824	-2.53E-05	1.940860391	0.733333349	0	72.9859	978.0215	655.736	3.9098	0.6199	468	2.924892225	0.006756501	13.15087133	0.030378513
8.199193576	×ÔÉí³µÁ¾	Road 1	50.91997887	47.27069206	-2.53E-05	1.943878651	0.741176486	0	73.1695	978.0244	655.736	3.9102	0.6195	469	2.931461662	0.006771676	13.19967825	0.030491257
8.215975617	×ÔÉí³µÁ¾	Road 1	51.14104891	47.42284927	-2.53E-05	1.949179411	0.741176486	0	73.472	978.0293	655.736	3.9108	0.6189	470	4.378650104	0.010114682	13.27316093	0.030661002
8.232628629	×ÔÉí³µÁ¾	Road 1	51.36081833	47.50911598	-2.53E-05	1.955390215	0.741176486	0	73.6302	978.0322	655.736	3.9108	0.619	471	2.794451656	0.006455183	13.31969697	0.0307685
8.249227391	×ÔÉí³µÁ¾	Road 1	51.5803013	47.60226631	-2.53E-05	1.960190892	0.741176486	0	73.8283	978.0352	655.736	3.9114	0.6183	472	2.976584533	0.00687591	13.36910459	0.030882632
8.265902031	×ÔÉí³µÁ¾	Road 1	51.80146731	47.75569725	-2.53E-05	1.964313626	0.741176486	0	74.0401	978.0391	655.736	3.9114	0.6184	473	4.462754021	0.010308962	13.4435194	0.03105453
8.282577403	×ÔÉí³µÁ¾	Road 1	52.02310745	47.84927673	-2.53E-05	1.968382001	0.741176486	0	74.3188	978.0439	655.736	3.9115	0.6182	474	2.990455589	0.006907952	13.49338636	0.031169722
8.29927147	×ÔÉí³µÁ¾	Road 1	52.24543057	47.94297638	-2.53E-05	1.970164299	0.741176486	0	74.5051	978.0469	655.736	3.912	0.6177	475	2.996103829	0.006921	13.54340352	0.031285262
8.315959305	×ÔÉí³µÁ¾	Road 1	52.46835375	48.09032707	-2.53E-05	1.971242428	0.741176486	0	74.7985	978.0518	655.736	3.9125	0.6173	476	4.33804943	0.010020894	13.61579617	0.031452489
8.332530575	×ÔÉí³µÁ¾	Road 1	52.69015165	48.18414001	-2.53E-05	1.972162485	0.741176486	0	74.9857	978.0547	655.736	3.9129	0.6168	477	3.029820794	0.006998886	13.66600415	0.03156847
8.349294288	×ÔÉí³µÁ¾	Road 1	52.91496222	48.27797356	-2.53E-05	1.972054482	0.741176486	0	75.1732	978.0576	655.736	3.9134	0.6163	478	3.008565015	0.006949785	13.71643887	0.031684974
8.365906979	×ÔÉí³µÁ¾	Road 1	53.13842785	48.42540321	-2.53E-05	1.972092509	0.741176486	0	75.4687	978.0625	655.736	3.9139	0.6158	479	4.384896467	0.010129111	13.7892838	0.031853246
8.382541664	×ÔÉí³µÁ¾	Road 1	53.36262284	48.51922302	-2.53E-05	1.972272396	0.741176486	0	75.6572	978.0664	655.736	3.9134	0.6163	480	3.039952905	0.007022291	13.83985246	0.031970059
8.399309775	×ÔÉí³µÁ¾	Road 1	53.58905303	48.6130291	-2.53E-05	1.972064495	0.741176486	0	75.846	978.0693	655.736	3.9139	0.6158	481	3.026075487	0.006990234	13.89059403	0.032087272
8.415868582	×ÔÉí³µÁ¾	Road 1	53.81333477	48.76041069	-2.53E-05	1.971332192	0.741176486	0	76.1435	978.0742	655.736	3.9144	0.6153	482	4.424126057	0.010219731	13.96385228	0.032256499
8.432543955	×ÔÉí³µÁ¾	Road 1	54.03962979	48.85420647	-2.53E-05	1.971874356	0.741176486	0	76.3333	978.0771	655.736	3.9149	0.6148	483	3.052473891	0.007051215	14.01475342	0.03237408
8.449212362	×ÔÉí³µÁ¾	Road 1	54.26648146	48.99484177	-2.53E-05	1.970792174	0.741176486	0	76.6187	978.082	655.736	3.9152	0.6145	484	4.248372823	0.009813741	14.08556703	0.03253766
8.465917426	×ÔÉí³µÁ¾	Road 1	54.49426701	49.08858948	-2.53E-05	1.970944166	0.741176486	0	76.8094	978.085	655.736	3.9158	0.6139	485	3.060234775	0.007069142	14.13668845	0.03265575
8.482600129	×ÔÉí³µÁ¾	Road 1	54.7221821	49.18233376	-2.53E-05	1.970372081	0.741176486	0	77.0005	978.0879	655.736	3.9163	0.6134	486	3.068616945	0.007088505	14.18788128	0.032774006
8.499217952	×ÔÉí³µÁ¾	Road 1	54.94964338	49.27604713	-2.53E-05	1.970512033	0.741176486	0	77.1919	978.0918	655.736	3.9159	0.6138	487	3.082440074	0.007120437	14.23910472	0.032892332
8.515876463	×ÔÉí³µÁ¾	Road 1	55.17840505	49.43671188	-2.53E-05	1.970762134	0.741176486	0	77.5209	978.0967	655.7359	3.917	0.6127	488	4.798284722	0.011084038	14.319037	0.033076975
8.532577495	×ÔÉí³µÁ¾	Road 1	55.40818531	49.53041153	-2.53E-05	1.969933987	0.741176486	0	77.7133	978.0996	655.7359	3.9176	0.6122	489	3.084448577	0.007125076	14.37055047	0.033195972
8.549205215	×ÔÉí³µÁ¾	Road 1	55.63738965	49.62409744	-2.53E-05	1.970071912	0.741176486	0	77.9061	978.1035	655.7359	3.9171	0.6126	490	3.099964186	0.007160917	14.42209581	0.033315041
8.565864459	×ÔÉí³µÁ¾	Road 1	55.86749309	49.72448845	-2.53E-05	1.970254064	0.741176486	0	78.1131	978.1064	655.7359	3.918	0.6117	491	3.273673398	0.007562186	14.47663273	0.033441022
8.582553027	×ÔÉí³µÁ¾	Road 1	56.09871498	49.87838287	-2.53E-05	1.969851971	0.741176486	0	78.4313	978.1123	655.7359	3.9179	0.6118	492	4.656738157	0.010757065	14.55434702	0.033620542
8.599236097	×ÔÉí³µÁ¾	Road 1	56.33029477	49.97205162	-2.53E-05	1.970031857	0.741176486	0	78.6254	978.1152	655.7359	3.9185	0.6112	493	3.111104219	0.007186651	14.60624979	0.033740437
8.615860885	×ÔÉí³µÁ¾	Road 1	56.56149804	50.06571007	-2.53E-05	1.969413877	0.741176486	0	78.8199	978.1182	655.7359	3.9191	0.6106	494	3.124617931	0.007217867	14.6581959	0.033860433
8.632567048	×ÔÉí³µÁ¾	Road 1	56.79451583	50.2128479	-2.53E-05	1.969071746	0.741176486	0	79.1263	978.124	655.7359	3.9188	0.6109	495	4.506811296	0.010410734	14.73348743	0.034034356
8.64926588	×ÔÉí³µÁ¾	Road 1	57.02786569	50.30648232	-2.53E-05	1.969213724	0.741176486	0	79.3217	978.127	655.7359	3.9194	0.6103	496	3.126738337	0.007222766	14.7857003	0.034154968
8.665874905	×ÔÉí³µÁ¾	Road 1	57.26039255	50.40010986	-2.53E-05	1.96900177	0.741176486	0	79.5175	978.1299	655.7358	3.9201	0.6097	497	3.145017069	0.007264989	14.83793597	0.034275632
8.682560541	×ÔÉí³µÁ¾	Road 1	57.49445692	50.50042534	-2.53E-05	1.969731808	0.741176486	0	79.7277	978.1338	655.7358	3.92	0.6098	498	3.313990189	0.007655317	14.89323201	0.034403366
8.69923848	×ÔÉí³µÁ¾	Road 1	57.72893997	50.6141098	-2.53E-05	1.968853831	0.741176486	0	79.9664	978.1377	655.7358	3.9204	0.6093	499	3.671875656	0.008482033	14.95447132	0.034544829
8.715912386	×ÔÉí³µÁ¾	Road 1	57.96386175	50.72107201	-2.56E-05	1.968601584	0.741176486	0	80.1916	978.1416	655.7358	3.9206	0.6091	500	3.503397154	0.008092847	15.01288664	0.034679768
8.732606086	×ÔÉí³µÁ¾	Road 1	58.19971742	50.86232529	-2.56E-05	2.114231825	0.741176486	0	80.4879	978.1465	655.7358	3.9211	0.6087	501	4.409679611	0.01018636	15.08650051	0.034849816
8.749176257	×ÔÉí³µÁ¾	Road 1	58.43455073	51.01938515	-2.56E-05	4.198989391	0.741176486	0	80.6859	978.1494	655.7358	3.9218	0.6081	502	4.869520455	0.011248592	15.16718929	0.035036207
8.765882053	×ÔÉí³µÁ¾	Road 1	58.67236002	51.24648972	-2.56E-05	4.34140873	0.741176486	0	80.899	978.1533	655.7358	3.9217	0.6082	503	6.705788721	0.015490372	15.27921484	0.035294986
8.782646865	×ÔÉí³µÁ¾	Road 1	58.91235432	51.53529282	-2.56E-05	4.327350616	0.741176486	0	81.1702	978.1572	655.7358	3.9227	0.6072	504	8.35155049	0.019292082	15.41922701	0.035618414
8.799180747	×ÔÉí³µÁ¾	Road 1	59.15008958	51.76321793	-2.56E-05	4.340265274	0.741176486	0	81.3854	978.1611	655.7358	3.9227	0.6073	505	6.855709314	0.015836689	15.5325785	0.035880256
8.815889109	×ÔÉí³µÁ¾	Road 1	59.39146556	52.00710411	-2.57E-05	4.348929882	0.741176486	0	81.616	978.165	655.7358	3.923	0.607	506	7.249497463	0.016746339	15.65370573	0.03616006
8.832545054	×ÔÉí³µÁ¾	Road 1	59.63356442	52.32701569	-2.58E-05	4.339583397	0.741176486	0	81.9203	978.1699	655.7358	3.9237	0.6064	507	9.366034182	0.021635539	15.80970588	0.036520421
8.850133518	×ÔÉí³µÁ¾	Road 1	59.89084634	52.66036491	-2.59E-05	4.325623512	0.741176486	0	82.2411	978.1758	655.7358	3.9236	0.6064	508	9.307466399	0.021500247	15.97340991	0.036898577
8.865881503	×ÔÉí³µÁ¾	Road 1	60.12200036	52.84196205	-2.62E-05	3.106622934	0.741176486	0	82.4463	978.1787	655.7358	3.9244	0.6056	509	5.967885117	0.013785815	16.06739208	0.037115676
8.882491262	×ÔÉí³µÁ¾	Road 1	60.36627189	52.94342422	-2.65E-05	1.107755542	0.741176486	0	82.6667	978.1826	655.7358	3.9245	0.6055	510	3.504001565	0.008094244	16.1255927	0.037250119
8.915950874	×ÔÉí³µÁ¾	Road 1	60.85936346	53.05290642	-2.71E-05	2.158536673	0.741176486	0	83.0494	978.1885	655.7358	3.9246	0.6044	511	2.211270697	0.005108035	16.19958096	0.037421032
8.932563565	×ÔÉí³µÁ¾	Road 1	61.10531322	53.29775391	-2.75E-05	2.743058681	0.741176486	0	83.4334	978.1953	655.7358	3.9258	0.6043	512	7.487503773	0.017296134	16.32396855	0.037708367
8.949215478	×ÔÉí³µÁ¾	Road 1	61.35237968	53.41363907	-2.83E-05	2.09158349	0.741176486	0	83.6409	978.1982	655.7358	3.9266	0.6034	513	3.924349296	0.009065247	16.38931647	0.037859321
8.965865925	×ÔÉí³µÁ¾	Road 1	61.59981064	53.49715233	-2.85E-05	1.555917382	0.741176486	0	83.8487	978.2021	655.7358	3.9255	0.6036	514	3.033132107	0.007006535	16.43981947	0.037975983
8.982520403	×ÔÉí³µÁ¾	Road 1	61.84784599	53.61484337	-2.88E-05	1.662886977	0.741176486	0	84.1908	978.208	655.7358	3.9258	0.6032	515	3.987649991	0.009211471	16.50623171	0.038129395
8.999196509	×ÔÉí³µÁ¾	Road 1	62.0964191	53.66140137	-2.90E-05	1.774013042	0.741176486	0	84.31	978.21	655.7358	3.926	0.603	516	2.011521345	0.004646614	16.53977605	0.038206883
9.015838891	×ÔÉí³µÁ¾	Road 1	62.34515472	53.80529137	-2.91E-05	1.698580146	0.741176486	0	84.6682	978.2158	655.7358	3.9276	0.6023	517	4.73336057	0.010934063	16.61855044	0.038388852
9.032545421	×ÔÉí³µÁ¾	Road 1	62.59519982	53.88087044	-2.93E-05	1.544288635	0.741176486	0	84.8776	978.2188	655.7357	3.9284	0.6015	518	2.824103135	0.006523678	16.66573141	0.03849784
9.04918707	×ÔÉí³µÁ¾	Road 1	62.84459364	53.95004654	-2.93E-05	1.447006345	0.741176486	0	85.0873	978.2227	655.7357	3.9273	0.6016	519	2.65641713	0.006136324	16.70993857	0.038599958
9.065823954	×ÔÉí³µÁ¾	Road 1	63.09436957	54.04818192	-2.93E-05	1.400244951	0.741176486	0	85.3122	978.2266	655.7357	3.9274	0.6014	520	3.473039108	0.00802272	16.76771912	0.038733431
9.082560908	×ÔÉí³µÁ¾	Road 1	63.34596208	54.115765	-2.93E-05	1.347395778	0.741176486	0	85.6275	978.2314	655.7357	3.9292	0.6005	521	2.608140429	0.006024804	16.81137144	0.038834268
9.099181297	×ÔÉí³µÁ¾	Road 1	63.59608612	54.17722321	-2.93E-05	1.322691798	0.741176486	0	85.8381	978.2354	655.7357	3.9291	0.6006	522	2.451681002	0.005663383	16.85211934	0.038928396
9.115884894	×ÔÉí³µÁ¾	Road 1	63.84792359	54.27662544	-2.93E-05	1.306032062	0.741176486	0	86.1845	978.2412	655.7357	3.9286	0.6002	523	3.51093081	0.00811025	16.91076451	0.039063866
9.132538273	×ÔÉí³µÁ¾	Road 1	64.09927959	54.33621597	-2.93E-05	1.284362555	0.733333349	0	86.3957	978.2441	655.7357	3.9295	0.5993	524	2.401956766	0.00554852	16.95076521	0.039156268
9.149233439	×ÔÉí³µÁ¾	Road 1	64.35153579	54.39432678	-2.93E-05	1.250744462	0.725490212	0	86.6071	978.248	655.7357	3.9294	0.5993	525	2.358379474	0.005447857	16.99013874	0.03924722
9.165916876	×ÔÉí³µÁ¾	Road 1	64.60400553	54.47864685	-2.93E-05	1.216391683	0.725490212	0	86.9246	978.2529	655.7357	3.9313	0.5985	526	3.101376202	0.007164179	17.04188036	0.039366744
9.182557792	×ÔÉí³µÁ¾	Road 1	64.85608853	54.53418617	-2.93E-05	1.216853738	0.725490212	0	87.1366	978.2568	655.7357	3.9302	0.5985	527	2.296268631	0.005304381	17.08009237	0.039455013
9.199231332	×ÔÉí³µÁ¾	Road 1	65.1089418	54.59379387	-2.93E-05	1.21675694	0.725490212	0	87.3639	978.2607	655.7357	3.9305	0.5983	528	2.410370368	0.005567956	17.12028178	0.039547851
9.2158092	×ÔÉí³µÁ¾	Road 1	65.36072427	54.67632179	-2.93E-05	1.191541314	0.725490212	0	87.6825	978.2656	655.7357	3.9314	0.5974	529	3.075740809	0.007104961	17.171271	0.039665636
9.232604436	×ÔÉí³µÁ¾	Road 1	65.61605906	54.73011703	-2.93E-05	1.173555493	0.725490212	0	87.8953	978.2695	655.7357	3.9313	0.5974	530	2.239880141	0.005174123	17.20889032	0.039752537
9.249186337	×ÔÉí³µÁ¾	Road 1	65.86851844	54.80998764	-2.93E-05	1.172144294	0.717647076	0	88.2147	978.2744	655.7357	3.9322	0.5965	531	3.006163413	0.006944237	17.25873822	0.039867685
9.265974609	×ÔÉí³µÁ¾	Road 1	66.12431543	54.85574913	-2.93E-05	1.17421627	0.709803939	0	88.3213	978.2764	655.7357	3.9322	0.5965	532	2.018285989	0.004662241	17.29262176	0.039945956
9.282578869	×ÔÉí³µÁ¾	Road 1	66.37760697	54.91659966	-2.93E-05	1.164924741	0.701960802	0	88.6414	978.2813	655.7357	3.9332	0.5956	533	2.465413271	0.005695105	17.33355812	0.040040519
9.299470143	×ÔÉí³µÁ¾	Road 1	66.63564414	54.99489441	-2.93E-05	1.135533571	0.686274529	0	88.9619	978.2871	655.7357	3.9331	0.5956	534	2.929125057	0.006766279	17.38303477	0.04015481
9.315900289	×ÔÉí³µÁ¾	Road 1	66.88686998	55.04594994	-2.93E-05	1.121151567	0.670588255	0	89.1759	978.29	655.7357	3.9341	0.5947	535	2.205671842	0.005095102	17.41927428	0.040238524
9.33257163	×ÔÉí³µÁ¾	Road 1	67.14206742	55.10719528	-2.93E-05	1.111465931	0.639215708	0	89.39	978.2939	655.7357	3.9341	0.5947	536	2.477179434	0.005722284	17.46057219	0.040333922
9.349967285	×ÔÉí³µÁ¾	Road 1	67.40869383	55.1778614	-2.93E-05	1.079603195	0.615686297	0	89.7423	978.2998	655.7356	3.9346	0.5941	537	2.665004297	0.00615616	17.50693168	0.040441012
9.365807642	×ÔÉí³µÁ¾	Road 1	67.65169236	55.22569313	-2.93E-05	1.048374295	0.592156887	0	89.9569	978.3037	655.7356	3.9346	0.5942	538	2.170046086	0.005012806	17.54130599	0.040520417
9.382505375	×ÔÉí³µÁ¾	Road 1	67.90805778	55.27190781	-2.93E-05	1.01699698	0.576470613	0	90.1717	978.3066	655.7356	3.9356	0.5932	539	2.05136561	0.004738655	17.57555914	0.040599542
9.399191377	×ÔÉí³µÁ¾	Road 1	68.16455226	55.33860512	-2.93E-05	0.978414595	0.552941203	0	90.4943	978.3125	655.7356	3.9356	0.5932	540	2.640860401	0.006100388	17.61962454	0.040701333
9.416812831	×ÔÉí³µÁ¾	Road 1	68.43563636	55.3815136	-2.93E-05	0.957464755	0.545098066	0	90.6788	978.3154	655.7356	3.936	0.5928	541	1.895704909	0.004379078	17.65302962	0.040778498
9.432483839	×ÔÉí³µÁ¾	Road 1	68.67695976	55.4376709	-2.93E-05	0.918639362	0.53725493	0	91.002	978.3213	655.7356	3.936	0.5927	542	2.447142318	0.005652899	17.69137881	0.040867085
9.449195501	×ÔÉí³µÁ¾	Road 1	68.93450652	55.48032188	-2.93E-05	0.892662883	0.53725493	0	91.233	978.3242	655.7356	3.9373	0.5915	543	1.954705162	0.004515369	17.72404518	0.040942544
9.465918159	×ÔÉí³µÁ¾	Road 1	69.19240262	55.51904182	-2.93E-05	0.875050485	0.53725493	0	91.4489	978.3281	655.7356	3.9373	0.5915	544	1.842351383	0.004255832	17.75485419	0.041013713
9.482566406	×ÔÉí³µÁ¾	Road 1	69.44941365	55.57580338	-2.93E-05	0.857331038	0.53725493	0	91.7729	978.334	655.7356	3.9373	0.5914	545	2.368932084	0.005472233	17.79429276	0.041104816
9.499161503	×ÔÉí³µÁ¾	Road 1	69.70578744	55.61556358	-2.93E-05	0.845149398	0.53725493	0	92.0045	978.3379	655.7356	3.9376	0.5911	546	1.88369175	0.004351328	17.82555281	0.041177027
9.51589699	×ÔÉí³µÁ¾	Road 1	69.96451179	55.65464745	-2.93E-05	0.832464576	0.53725493	0	92.2363	978.3408	655.7356	3.9389	0.5898	547	1.855717666	0.004286708	17.85660915	0.041248767
9.532470827	×ÔÉí³µÁ¾	Road 1	70.22090236	55.69054871	-2.93E-05	0.822253168	0.53725493	0	92.4527	978.3447	655.7356	3.9389	0.5898	548	1.775324934	0.004101001	17.88603309	0.041316736
9.549196784	×ÔÉí³µÁ¾	Road 1	70.47991623	55.74867325	-2.93E-05	0.811971724	0.529411793	0	92.8087	978.3506	655.7355	3.9395	0.5892	549	2.40696187	0.005560082	17.92629183	0.041409734
9.565809109	×ÔÉí³µÁ¾	Road 1	70.73733183	55.7836544	-2.93E-05	0.805633843	0.529411793	0	93.0255	978.3545	655.7355	3.9396	0.5892	550	1.74868939	0.004039472	17.95534163	0.041476839
9.582481915	×ÔÉí³µÁ¾	Road 1	70.99585621	55.82070236	-2.93E-05	0.796532631	0.529411793	0	93.258	978.3584	655.7355	3.9399	0.5889	551	1.80572904	0.004171234	17.9854482	0.041546385
9.599227666	×ÔÉí³µÁ¾	Road 1	71.25574938	55.87180939	-2.93E-05	0.785998166	0.521568656	0	93.5837	978.3633	655.7355	3.9409	0.5878	552	2.207491719	0.005099306	18.02241431	0.041631777
9.615855753	×ÔÉí³µÁ¾	Road 1	71.51397184	55.90546188	-2.93E-05	0.779987335	0.521568656	0	93.8011	978.3672	655.7355	3.9409	0.5878	553	1.712308487	0.003955433	18.05088672	0.041697548
9.632472843	×ÔÉí³µÁ¾	Road 1	71.77217757	55.93883286	-2.93E-05	0.774219573	0.521568656	0	94.0185	978.3711	655.7355	3.941	0.5877	554	1.705613785	0.003939968	18.07922906	0.041763019
9.649158479	×ÔÉí³µÁ¾	Road 1	72.03168918	55.99078102	-2.93E-05	0.766988575	0.521568656	0	94.3605	978.377	655.7355	3.9413	0.5874	555	2.241242916	0.005177271	18.11662562	0.041849405
9.665883336	×ÔÉí³µÁ¾	Road 1	72.29196299	56.02354088	-2.93E-05	0.763014853	0.521568656	0	94.5783	978.3799	655.7355	3.9424	0.5863	556	1.683799374	0.003889577	18.14478692	0.041914458
9.682574104	×ÔÉí³µÁ¾	Road 1	72.55185728	56.05610504	-2.93E-05	0.759104431	0.521568656	0	94.7962	978.3838	655.7355	3.9424	0.5863	557	1.68086481	0.003882798	18.17284185	0.041979265
9.699152339	×ÔÉí³µÁ¾	Road 1	72.81015918	56.09082184	-2.93E-05	0.756894052	0.521568656	0	95.0298	978.3877	655.7355	3.9428	0.5859	558	1.751041622	0.004044906	18.20187103	0.042046322
9.715820014	×ÔÉí³µÁ¾	Road 1	73.0700999	56.14379997	-2.93E-05	0.754006863	0.521568656	0	95.3883	978.3936	655.7355	3.9434	0.5853	559	2.278131361	0.005262483	18.23984218	0.042134035
9.732511514	×ÔÉí³µÁ¾	Road 1	73.33056103	56.17590065	-2.93E-05	0.750896335	0.521568656	0	95.6066	978.3975	655.7355	3.9434	0.5852	560	1.670302127	0.003858398	18.26772203	0.042198438
9.749163794	×ÔÉí³µÁ¾	Road 1	73.59055804	56.2078743	-2.93E-05	0.747882783	0.521568656	0	95.8251	978.4004	655.7355	3.9445	0.5842	561	1.669578538	0.003856726	18.29552432	0.042262661
9.765817173	×ÔÉí³µÁ¾	Road 1	73.85080376	56.25792732	-2.93E-05	0.74648267	0.521568656	0	96.1687	978.4063	655.7355	3.9448	0.5838	562	2.198162228	0.005077755	18.33213115	0.042347223
9.782539464	×ÔÉí³µÁ¾	Road 1	74.112274	56.28970528	-2.93E-05	0.745135605	0.521568656	0	96.3876	978.4102	655.7355	3.9448	0.5837	563	1.661973851	0.00383916	18.35992316	0.042411422
9.799220335	×ÔÉí³µÁ¾	Road 1	74.3732436	56.32143517	-2.93E-05	0.744315386	0.521568656	0	96.6065	978.4141	655.7355	3.9449	0.5836	564	1.663636152	0.003843	18.38767406	0.042475527
9.81585392	×ÔÉí³µÁ¾	Road 1	74.63370319	56.37116203	-2.93E-05	0.74216193	0.521568656	0	96.9508	978.4199	655.7355	3.9452	0.5833	565	2.194181837	0.00506856	18.42417117	0.042559835
9.849229224	×ÔÉí³µÁ¾	Road 1	75.15675452	56.41850624	-2.93E-05	0.740261674	0.521568656	0	97.2797	978.4248	655.7355	3.9463	0.5822	566	1.430154238	0.003303656	18.471903	0.042670096
9.865810392	×ÔÉí³µÁ¾	Road 1	75.41691194	56.4837616	-2.93E-05	0.739724874	0.521568656	0	97.7344	978.4326	655.7355	3.9467	0.5817	567	2.659254129	0.006142877	18.51599654	0.042771952
9.882460472	×ÔÉí³µÁ¾	Road 1	75.67829606	56.51521339	-2.93E-05	0.738841534	0.521568656	0	97.9541	978.4365	655.7354	3.9467	0.5816	568	1.661893494	0.003838974	18.5436672	0.042835871
9.899164069	×ÔÉí³µÁ¾	Road 1	75.94073892	56.56232414	-2.93E-05	0.737404525	0.521568656	0	98.2839	978.4414	655.7354	3.9478	0.5805	569	2.117993106	0.004892564	18.5790453	0.042917595
9.915847139	×ÔÉí³µÁ¾	Road 1	76.20300461	56.59369011	-2.93E-05	0.737741351	0.521568656	0	98.5039	978.4453	655.7354	3.9479	0.5804	570	1.659443748	0.003833315	18.60672992	0.042981546
9.932495019	×ÔÉí³µÁ¾	Road 1	76.46486214	56.62505264	-2.95E-05	0.737254381	0.521568656	0	98.724	978.4492	655.7354	3.9479	0.5803	571	1.662040573	0.003839314	18.63439937	0.043045463
9.94916416	×ÔÉí³µÁ¾	Road 1	76.72727163	56.67203636	-2.98E-05	0.736371219	0.521568656	0	99.0544	978.4541	655.7354	3.949	0.5792	572	2.120645437	0.004898691	18.66974871	0.04312712
9.965800678	×ÔÉí³µÁ¾	Road 1	76.98931225	56.7033474	-3.00E-05	0.736251116	0.521568656	0	99.2748	978.458	655.7354	3.9491	0.5791	573	1.663038521	0.003841619	18.69741588	0.043191031
9.982592248	×ÔÉí³µÁ¾	Road 1	77.2539827	56.74356766	-3.06E-05	0.735720992	0.521568656	0	99.4954	978.4619	655.7354	3.9492	0.5789	574	1.91550425	0.004424815	18.7295802	0.04326533
9.999180014	×ÔÉí³µÁ¾	Road 1	77.51561559	56.78151169	-3.08E-05	0.735424161	0.521568656	0	99.8264	978.4668	655.7354	3.9502	0.5778	575	1.863731021	0.004305219	18.76049534	0.043336744
10.0157949	×ÔÉí³µÁ¾	Road 1	77.7778206	56.81277466	-3.11E-05	0.735341072	0.521568656	0	100.0473	978.4707	655.7354	3.9503	0.5776	576	1.665452331	0.003847195	18.78816664	0.043400665
10.0325073	×ÔÉí³µÁ¾	Road 1	78.04178184	56.85962448	-3.17E-05	0.7341609	0.521568656	0	100.3788	978.4766	655.7354	3.9504	0.5776	577	2.119157142	0.004895253	18.82358283	0.043482476
10.0492065	×ÔÉí³µÁ¾	Road 1	78.30560703	56.87522507	-3.21E-05	0.734103978	0.521568656	0	100.4894	978.4785	655.7354	3.9505	0.5777	578	1.201478267	0.002775415	18.84364656	0.043528824
10.06578437	×ÔÉí³µÁ¾	Road 1	78.56777196	56.93094635	-3.26E-05	0.73435396	0.521568656	0	100.8845	978.4844	655.7354	3.9518	0.5766	579	2.395675993	0.005534012	18.88336176	0.043620566
10.0824909	×ÔÉí³µÁ¾	Road 1	78.83211617	56.96210976	-3.31E-05	0.733443916	0.521568656	0	101.1059	978.4883	655.7354	3.9518	0.5764	580	1.661030743	0.003836981	18.91111182	0.043684668
10.09914427	×ÔÉí³µÁ¾	Road 1	79.09576353	56.9932663	-3.38E-05	0.734180868	0.521568656	0	101.3275	978.4922	655.7354	3.9519	0.5763	581	1.664503805	0.003845004	18.93883143	0.043748701
10.11585117	×ÔÉí³µÁ¾	Road 1	79.3604854	57.04223785	-3.48E-05	0.73323065	0.529411793	0	101.6759	978.498	655.7354	3.9524	0.5758	582	2.188007892	0.005054298	18.97538625	0.043833142
10.13245397	×ÔÉí³µÁ¾	Road 1	79.62370157	57.07341843	-3.56E-05	0.735190928	0.529411793	0	101.8977	978.501	655.7354	3.9534	0.5747	583	1.669947373	0.003857578	19.00311205	0.043897189
10.14915793	×ÔÉí³µÁ¾	Road 1	79.88873962	57.12039185	-3.65E-05	0.737691224	0.529411793	0	102.2308	978.5068	655.7354	3.9536	0.5746	584	2.13185033	0.004924574	19.0387224	0.043979449
10.16583733	×ÔÉí³µÁ¾	Road 1	80.15354395	57.15405464	-3.75E-05	0.739674687	0.529411793	0	102.4688	978.5107	655.7354	3.954	0.5741	585	1.741087738	0.004021913	19.0677627	0.044046532
10.20183315	×ÔÉí³µÁ¾	Road 1	80.72585009	57.23726921	-3.86E-05	0.741271734	0.529411793	0	103.0566	978.5205	655.7353	3.9549	0.5732	586	1.88785575	0.004360947	19.13571761	0.044203508
10.21650272	×ÔÉí³µÁ¾	Road 1	80.9592138	57.26882057	-4.00E-05	0.74159497	0.529411793	0	103.2792	978.5244	655.7353	3.955	0.5731	587	1.809596861	0.004180169	19.16226363	0.044264829
10.23323601	×ÔÉí³µÁ¾	Road 1	81.2255538	57.30039253	-4.37E-05	0.742325008	0.529411793	0	103.5019	978.5283	655.7353	3.9552	0.5729	588	1.679722061	0.003880158	19.1903709	0.044329757
10.24992202	×ÔÉí³µÁ¾	Road 1	81.49136088	57.34779854	-4.60E-05	0.742615163	0.529411793	0	103.8363	978.5332	655.7353	3.9564	0.5718	589	2.153482983	0.004974546	19.22630392	0.044412762
10.26579426	×ÔÉí³µÁ¾	Road 1	81.74434432	57.37941856	-4.93E-05	0.742922008	0.529411793	0	104.0593	978.5371	655.7353	3.9565	0.5716	590	1.733866594	0.004005232	19.25382428	0.044476334
10.28252792	×ÔÉí³µÁ¾	Road 1	82.01120441	57.41102829	-5.27E-05	0.742832005	0.529411793	0	104.2825	978.541	655.7353	3.957	0.5715	591	1.683485142	0.003888851	19.28199514	0.044541409
10.29919156	×ÔÉí³µÁ¾	Road 1	82.27716774	57.45850639	-5.68E-05	0.743515193	0.529411793	0	104.6175	978.5469	655.7353	3.9575	0.5712	592	2.161101047	0.004992143	19.31800696	0.044624596
10.31580828	×ÔÉí³µÁ¾	Road 1	82.54252828	57.49015045	-6.17E-05	0.743431926	0.529411793	0	104.841	978.5498	655.7352	3.9586	0.5701	593	1.693020536	0.003910877	19.34613941	0.044689582
10.34995629	×ÔÉí³µÁ¾	Road 1	83.0886481	57.57382851	-6.69E-05	0.743421912	0.529411793	0	105.4322	978.5596	655.7352	3.9595	0.5691	594	1.966136887	0.004541776	19.41327906	0.044844675
10.36725114	×ÔÉí³µÁ¾	Road 1	83.36539196	57.60545883	-7.53E-05	0.743955314	0.529411793	0	105.6562	978.5635	655.7352	3.9597	0.569	595	1.658257932	0.003830576	19.44195839	0.044910924
10.41584292	×ÔÉí³µÁ¾	Road 1	84.14427684	57.70493317	-0.000120506	0.744465232	0.529411793	0	106.3608	978.5752	655.7352	3.9607	0.5679	596	1.768814999	0.004085963	19.52790826	0.045109468
10.43236691	×ÔÉí³µÁ¾	Road 1	84.40938089	57.75692596	-0.000146784	0.743081987	0.529411793	0	106.7296	978.5811	655.7352	3.9615	0.567	597	2.319040963	0.005356985	19.56622806	0.045197987
10.44915628	×ÔÉí³µÁ¾	Road 1	84.67889012	57.78853912	-0.000246124	0.743399739	0.529411793	0	106.9542	978.585	655.7352	3.9616	0.5669	598	1.689556331	0.003902875	19.59459465	0.045263514
10.46584411	×ÔÉí³µÁ¾	Road 1	84.94698934	57.8359726	-0.000293457	0.742884278	0.529411793	0	107.2914	978.5908	655.7352	3.9618	0.5666	599	2.169931802	0.005012542	19.63080611	0.045347162
10.48243811	×ÔÉí³µÁ¾	Road 1	85.21372671	57.86758575	-0.000339769	0.743162274	0.529411793	0	107.5164	978.5947	655.7352	3.962	0.5664	600	1.702540978	0.00393287	19.65905807	0.045412424
10.49915344	×ÔÉí³µÁ¾	Road 1	85.48256114	57.89919205	-0.000395627	0.742407262	0.529411793	0	107.7414	978.5986	655.7352	3.9622	0.5662	601	1.696184419	0.003918186	19.68741035	0.045477918
10.51579106	×ÔÉí³µÁ¾	Road 1	85.75036468	57.94656372	-0.000441716	0.742938399	0.529411793	0	108.0793	978.6035	655.7352	3.9634	0.565	602	2.175944531	0.005026432	19.72361288	0.045561546
10.53252434	×ÔÉí³µÁ¾	Road 1	86.01985501	57.97815628	-0.00047268	0.742837191	0.529411793	0	108.3047	978.6074	655.7352	3.9635	0.5648	603	1.696661284	0.003919288	19.75200361	0.045627128
10.54919092	×ÔÉí³µÁ¾	Road 1	86.28841715	58.00974197	-0.000483878	0.742339253	0.529411793	0	108.5302	978.6113	655.7352	3.9637	0.5646	604	1.701003486	0.003929318	19.78035351	0.045692617
10.56577099	×ÔÉí³µÁ¾	Road 1	86.55573071	58.04130707	-0.000488407	0.74224925	0.529411793	0	108.7558	978.6152	655.7352	3.9639	0.5644	605	1.706101523	0.003941095	19.80864079	0.04575796
10.58249841	×ÔÉí³µÁ¾	Road 1	86.82559818	58.07964935	-0.000490682	0.742140174	0.529411793	0	109.0299	978.6201	655.7352	3.964	0.5643	606	1.901849066	0.004393271	19.84045382	0.045831448
10.59915289	×ÔÉí³µÁ¾	Road 1	87.09446591	58.11792984	-0.000490682	0.74161011	0.529411793	0	109.3043	978.624	655.7352	3.965	0.5632	607	1.906083372	0.004403053	19.87219865	0.045904779
10.61581213	×ÔÉí³µÁ¾	Road 1	87.3636504	58.16975784	-0.000490682	0.741881132	0.53725493	0	109.6757	978.6309	655.7352	3.9649	0.5633	608	2.315672491	0.005349203	19.910776	0.045993893
10.63245342	×ÔÉí³µÁ¾	Road 1	87.63270109	58.20359573	-0.000490682	0.74365145	0.53725493	0	109.9181	978.6348	655.7351	3.9654	0.5628	609	1.775170486	0.004100644	19.94031711	0.046062133
10.65009833	×ÔÉí³µÁ¾	Road 1	87.91820034	58.24892807	-0.000490682	0.74643296	0.53725493	0	110.1445	978.6387	655.7351	3.9655	0.5626	610	2.045814948	0.004725833	19.97641534	0.046145519
10.66579903	×ÔÉí³µÁ¾	Road 1	88.17239042	58.28302689	-0.000490682	0.748112023	0.53725493	0	110.4843	978.6436	655.7351	3.9668	0.5613	611	1.846886875	0.004266309	20.00541276	0.046212503
10.68266061	×ÔÉí³µÁ¾	Road 1	88.44552415	58.3148941	-0.000490682	0.749242425	0.545098066	0	110.711	978.6475	655.7351	3.967	0.5611	612	1.705741574	0.003940263	20.03417426	0.046278943
10.69914904	×ÔÉí³µÁ¾	Road 1	88.71275958	58.34682999	-0.000488407	0.750382662	0.545098066	0	110.9378	978.6514	655.7351	3.9672	0.5609	613	1.730171124	0.003996695	20.06270206	0.046344842
10.71589296	×ÔÉí³µÁ¾	Road 1	88.98437052	58.3972847	-0.000488407	0.755573452	0.545098066	0	111.2945	978.6572	655.7351	3.9687	0.5603	614	2.274267835	0.005253559	20.10078222	0.046432807
10.73251775	×ÔÉí³µÁ¾	Road 1	89.2541981	58.42957764	-0.000487839	0.757491648	0.545098066	0	111.5216	978.6611	655.7351	3.9689	0.56	615	1.735019091	0.004007894	20.12962654	0.046499437
10.74918945	×ÔÉí³µÁ¾	Road 1	89.52493711	58.46194611	-0.000487839	0.758632064	0.545098066	0	111.7489	978.665	655.7351	3.9691	0.5598	616	1.735340725	0.004008637	20.15855763	0.046566268
10.76582047	×ÔÉí³µÁ¾	Road 1	89.79525071	58.51288834	-0.000487839	0.759722292	0.545098066	0	112.1062	978.6709	655.7351	3.9697	0.5592	617	2.303326958	0.005320685	20.19686431	0.046654757
10.78252187	×ÔÉí³µÁ¾	Road 1	90.06685896	58.5453804	-0.000487839	0.761662781	0.552941203	0	112.3338	978.6748	655.7351	3.9699	0.559	618	1.73938586	0.004017981	20.22591448	0.046721862
10.79913566	×ÔÉí³µÁ¾	Road 1	90.33719295	58.57798233	-0.000487839	0.764453232	0.552941203	0	112.5615	978.6787	655.7351	3.9701	0.5587	619	1.748725117	0.004039555	20.25496744	0.046788975
10.81581543	×ÔÉí³µÁ¾	Road 1	90.60883915	58.62948074	-0.000487839	0.768373966	0.552941203	0	112.9196	978.6846	655.735	3.9707	0.5581	620	2.319666086	0.005358429	20.29365894	0.046878352
10.84924279	×ÔÉí³µÁ¾	Road 1	91.15369532	58.67895355	-0.000487839	0.772735775	0.56078434	0	113.2617	978.6904	655.735	3.9711	0.5577	621	1.506591444	0.003480226	20.3440203	0.046994687
10.86582139	×ÔÉí³µÁ¾	Road 1	91.42424968	58.75017242	-0.000487839	0.77748549	0.56078434	0	113.751	978.6982	655.735	3.9721	0.5567	622	2.936692598	0.00678376	20.39270656	0.047107152
10.88245571	×ÔÉí³µÁ¾	Road 1	91.69586813	58.78368073	-0.000487839	0.783045471	0.568627477	0	113.9795	978.7021	655.735	3.9723	0.5564	623	1.780248262	0.004112373	20.42231978	0.047175559
10.89919523	×ÔÉí³µÁ¾	Road 1	91.96936098	58.81735382	-0.000487839	0.786215901	0.568627477	0	114.2081	978.7061	655.735	3.9726	0.5562	624	1.779664407	0.004111025	20.4521105	0.047244375
10.91583248	×ÔÉí³µÁ¾	Road 1	92.24141789	58.86819305	-0.000487839	0.792180002	0.568627477	0	114.5513	978.7119	655.735	3.973	0.5558	625	2.311765603	0.005340179	20.49057193	0.047333221
10.9324492	×ÔÉí³µÁ¾	Road 1	92.51329662	58.90231247	-0.000487839	0.794520378	0.568627477	0	114.7803	978.7158	655.735	3.9732	0.5555	626	1.803031563	0.004165003	20.5205324	0.04740243
10.94911138	×ÔÉí³µÁ¾	Road 1	92.78607741	58.93652802	-0.000487839	0.796040714	0.568627477	0	115.0094	978.7197	655.735	3.9735	0.5553	627	1.803989572	0.004167216	20.5505908	0.047471865
10.96584393	×ÔÉí³µÁ¾	Road 1	93.06018138	58.97331848	-0.000487839	0.79943651	0.568627477	0	115.255	978.7236	655.735	3.974	0.5547	628	1.878908601	0.004340279	20.58202974	0.047544489
10.98245516	×ÔÉí³µÁ¾	Road 1	93.33249061	59.01510773	-0.000487839	0.799881577	0.568627477	0	115.5336	978.7285	655.735	3.9742	0.5545	629	2.041588873	0.00471607	20.61594303	0.047622828
10.99913053	×ÔÉí³µÁ¾	Road 1	93.6061141	59.07181778	-0.000490112	0.802167296	0.568627477	0	115.9108	978.7344	655.735	3.9752	0.5536	630	2.494726625	0.005762819	20.65754353	0.047718926
11.0158059	×ÔÉí³µÁ¾	Road 1	93.87989789	59.10642471	-0.000490682	0.804122448	0.568627477	0	116.1405	978.7383	655.735	3.9755	0.5533	631	1.81947812	0.004202994	20.687884	0.047789012
11.03244792	×ÔÉí³µÁ¾	Road 1	94.15337427	59.15839691	-0.000490682	0.804407954	0.568627477	0	116.4854	978.7441	655.735	3.9759	0.5529	632	2.35601385	0.005442392	20.72709282	0.047879584
11.04912915	×ÔÉí³µÁ¾	Road 1	94.42765598	59.19309998	-0.000497548	0.805483043	0.568627477	0	116.7155	978.748	655.735	3.9761	0.5526	633	1.824279834	0.004214086	20.75752406	0.047949881
11.0657895	×ÔÉí³µÁ¾	Road 1	94.70175487	59.22783051	-0.000518532	0.806183159	0.568627477	0	116.9457	978.752	655.735	3.9764	0.5523	634	1.827352687	0.004221185	20.78796839	0.048020207
11.08251912	×ÔÉí³µÁ¾	Road 1	94.97723581	59.27996063	-0.00054558	0.80684793	0.568627477	0	117.2914	978.7578	655.735	3.9768	0.5519	635	2.356697728	0.005443972	20.82739505	0.048111283
11.09916297	×ÔÉí³µÁ¾	Road 1	95.25146512	59.31473923	-0.000586287	0.806733906	0.568627477	0	117.5219	978.7617	655.735	3.9771	0.5516	636	1.832132474	0.004232226	20.85788879	0.048181723
11.11579692	×ÔÉí³µÁ¾	Road 1	95.52577253	59.36693115	-0.000630988	0.80744344	0.568627477	0	117.868	978.7676	655.735	3.9775	0.5512	637	2.370811397	0.005476574	20.89732475	0.04827282
11.13248769	×ÔÉí³µÁ¾	Road 1	95.80112059	59.38930206	-0.000686418	0.806931734	0.568627477	0	117.9835	978.7695	655.735	3.9777	0.5511	638	1.449692433	0.00334879	20.92152123	0.048328714
11.14918139	×ÔÉí³µÁ¾	Road 1	96.07677065	59.44399338	-0.00077011	0.807390451	0.568627477	0	118.3795	978.7764	655.735	3.978	0.5507	639	2.444578162	0.005646976	20.96233028	0.048422983
11.16578418	×ÔÉí³µÁ¾	Road 1	96.35108017	59.47879944	-0.000861171	0.807238758	0.568627477	0	118.6107	978.7803	655.7349	3.9783	0.5504	640	1.839876058	0.004250114	20.99287737	0.048493547
11.18244673	×ÔÉí³µÁ¾	Road 1	96.62653795	59.5136055	-0.000973459	0.808204174	0.568627477	0	118.8421	978.7842	655.7349	3.9786	0.5501	641	1.836912235	0.004243267	21.023485	0.04856425
11.19918331	×ÔÉí³µÁ¾	Road 1	96.90347416	59.56831741	-0.00112158	0.807587385	0.568627477	0	119.2059	978.79	655.7349	3.9794	0.5494	642	2.445378368	0.005648824	21.06441228	0.048658792
11.2158169	×ÔÉí³µÁ¾	Road 1	97.17886683	59.60312347	-0.001265712	0.807461143	0.568627477	0	119.4376	978.7939	655.7349	3.9797	0.549	643	1.841097093	0.004252934	21.09503633	0.048729534
11.23253516	×ÔÉí³µÁ¾	Road 1	97.45583462	59.64042206	-0.001400958	0.80734694	0.568627477	0	119.686	978.7988	655.7349	3.9793	0.5494	644	1.913396985	0.004419947	21.127025	0.048803428
11.24911999	×ÔÉí³µÁ¾	Road 1	97.73083237	59.69260712	-0.001526012	0.806763649	0.56078434	0	120.034	978.8047	655.7349	3.9798	0.549	645	2.386753632	0.005513401	21.16660891	0.048894867
11.26581479	×ÔÉí³µÁ¾	Road 1	98.00781452	59.72732391	-0.001602494	0.804630518	0.56078434	0	120.2662	978.8086	655.7349	3.9801	0.5487	646	1.837591687	0.004244837	21.19728713	0.048965733
11.28253818	×ÔÉí³µÁ¾	Road 1	98.28551172	59.77913818	-0.001639128	0.800790787	0.56078434	0	120.6147	978.8145	655.7349	3.9806	0.5482	647	2.364873206	0.005462857	21.23683583	0.049057091
11.29917763	×ÔÉí³µÁ¾	Road 1	98.56197417	59.81356659	-0.001651889	0.799902022	0.56078434	0	120.8472	978.8184	655.7349	3.9809	0.5479	648	1.834433155	0.004237541	21.26735979	0.049127601
11.31584017	×ÔÉí³µÁ¾	Road 1	98.8389907	59.85037766	-0.001662145	0.798565149	0.56078434	0	121.0965	978.8223	655.7349	3.9825	0.5473	649	1.907811543	0.004407045	21.29914878	0.049201034
11.3324525	×ÔÉí³µÁ¾	Road 1	99.1153308	59.8847168	-0.00166343	0.798047721	0.56078434	0	121.3293	978.8262	655.7349	3.9828	0.547	650	1.835227476	0.004239375	21.32963618	0.04927146
11.34915426	×ÔÉí³µÁ¾	Road 1	99.39340845	59.9385498	-0.00166343	0.795007765	0.552941203	0	121.6953	978.833	655.7349	3.9826	0.5473	651	2.435012475	0.005624879	21.37030518	0.049365405
11.36576805	×ÔÉí³µÁ¾	Road 1	99.6701564	59.96780777	-0.00166343	0.793730259	0.552941203	0	121.8952	978.8359	655.7349	3.9833	0.5466	652	1.678848501	0.00387814	21.39819722	0.049429836
11.38250831	×ÔÉí³µÁ¾	Road 1	99.9492591	60.02118073	-0.00166343	0.788680434	0.552941203	0	122.2617	978.8428	655.7349	3.9831	0.5468	653	2.419872522	0.005589906	21.4387065	0.049523412
11.39917342	×ÔÉí³µÁ¾	Road 1	100.2272654	60.05496368	-0.00165061	0.786532283	0.552941203	0	122.4952	978.8467	655.7349	3.9835	0.5465	654	1.81888478	0.004201624	21.46901841	0.049593433
11.41576265	×ÔÉí³µÁ¾	Road 1	100.5041612	60.08867111	-0.001644224	0.785212398	0.552941203	0	122.7288	978.8506	655.7349	3.9838	0.5462	655	1.822187939	0.004209254	21.49924711	0.049663261
11.43247944	×ÔÉí³µÁ¾	Road 1	100.7834315	60.14152222	-0.001631503	0.783433616	0.552941203	0	123.0961	978.8574	655.7349	3.9836	0.5464	656	2.410238243	0.00556765	21.53953856	0.049756334
11.44917497	×ÔÉí³µÁ¾	Road 1	101.0625023	60.17505112	-0.001618848	0.782124102	0.552941203	0	123.33	978.8613	655.7349	3.984	0.546	657	1.812093086	0.004185935	21.56979242	0.04982622
11.46584338	×ÔÉí³µÁ¾	Road 1	101.341352	60.22525177	-0.001602494	0.781195283	0.552941203	0	123.6811	978.8672	655.7349	3.9845	0.5456	658	2.33526297	0.005394457	21.60871754	0.049916138
11.48243298	×ÔÉí³µÁ¾	Road 1	101.6190372	60.25865021	-0.001581274	0.779425919	0.552941203	0	123.9154	978.8721	655.7349	3.9839	0.5462	659	1.816777448	0.004196756	21.63885715	0.04998576
11.51588123	×ÔÉí³µÁ¾	Road 1	102.1795307	60.32532349	-0.001561475	0.778412163	0.552941203	0	124.3842	978.8799	655.7349	3.9856	0.5455	660	1.807803485	0.004176026	21.69932501	0.050125441
11.5324459	×ÔÉí³µÁ¾	Road 1	102.4572805	60.36336365	-0.001560243	0.777492583	0.552941203	0	124.6524	978.8848	655.7349	3.9855	0.5456	661	1.967085376	0.004543967	21.73190913	0.05020071
11.54918395	×ÔÉí³µÁ¾	Road 1	102.7381914	60.4179657	-0.001565175	0.776095569	0.545098066	0	125.0382	978.8916	655.7349	3.9857	0.5455	662	2.472416388	0.005711282	21.77329257	0.050296306
11.56579261	×ÔÉí³µÁ¾	Road 1	103.0170835	60.45109634	-0.001570117	0.772895157	0.545098066	0	125.2732	978.8955	655.7349	3.9861	0.5451	663	1.81199715	0.004185713	21.80338741	0.050365825
11.58243316	×ÔÉí³µÁ¾	Road 1	103.2967396	60.50052795	-0.001572592	0.769693494	0.545098066	0	125.6259	978.9014	655.7349	3.9866	0.5446	664	2.323060427	0.00536627	21.84204441	0.050455123
11.59913639	×ÔÉí³µÁ¾	Road 1	103.5776014	60.53334961	-0.00158625	0.767974257	0.545098066	0	125.8612	978.9063	655.7349	3.986	0.5452	665	1.798476176	0.00415448	21.87208478	0.050524516
11.61619262	×ÔÉí³µÁ¾	Road 1	103.8645537	60.56606827	-0.001602494	0.766035736	0.545098066	0	126.0967	978.9102	655.7349	3.9864	0.5449	666	1.774847419	0.004099898	21.90235697	0.050594445
11.63245232	×ÔÉí³µÁ¾	Road 1	104.1383267	60.61507416	-0.001618848	0.764629543	0.545098066	0	126.4501	978.917	655.7349	3.987	0.5463	667	2.349620931	0.005427624	21.9405611	0.050682696
11.64912072	×ÔÉí³µÁ¾	Road 1	104.4191323	60.64766922	-0.001640401	0.763730884	0.545098066	0	126.6858	978.9209	655.7349	3.9873	0.5459	668	1.796336559	0.004149537	21.97050317	0.050751862
11.66577923	×ÔÉí³µÁ¾	Road 1	104.6999216	60.68018875	-0.001657011	0.76282239	0.545098066	0	126.9217	978.9248	655.7349	3.9877	0.5456	669	1.795371741	0.004147309	22.00041139	0.05082095
11.68241465	×ÔÉí³µÁ¾	Road 1	104.9804824	60.71496735	-0.001667289	0.761083901	0.545098066	0	127.1746	978.9297	655.7349	3.9874	0.5459	670	1.868864044	0.004317076	22.03150072	0.050892767
11.69915784	×ÔÉí³µÁ¾	Road 1	105.2631079	60.76811371	-0.001677608	0.759745777	0.545098066	0	127.5626	978.9365	655.7349	3.9876	0.5457	671	2.438868333	0.005633786	22.07233515	0.050987094
11.71574707	×ÔÉí³µÁ¾	Road 1	105.5432833	60.80037231	-0.001682784	0.757157981	0.545098066	0	127.7989	978.9404	655.7349	3.988	0.5454	672	1.794356471	0.004144963	22.10210214	0.051055856
11.73246166	×ÔÉí³µÁ¾	Road 1	105.8257257	60.83261032	-0.001693168	0.757059515	0.545098066	0	128.0354	978.9453	655.7349	3.9874	0.546	673	1.786836191	0.004127592	22.13196838	0.051124847
11.74915353	×ÔÉí³µÁ¾	Road 1	106.1080186	60.88322296	-0.001694469	0.756492019	0.545098066	0	128.4073	978.9521	655.7349	3.9873	0.5461	674	2.368255185	0.005470669	22.17149899	0.051216163
11.76583953	×ÔÉí³µÁ¾	Road 1	106.3903615	60.91538544	-0.001694469	0.755573392	0.545098066	0	128.644	978.9561	655.7349	3.9877	0.5457	675	1.788217342	0.004130782	22.20133718	0.051285089
11.78247788	×ÔÉí³µÁ¾	Road 1	106.6720784	60.9544075	-0.001694469	0.755075037	0.545098066	0	128.881	978.9609	655.7349	3.9881	0.5463	676	2.0091243	0.004641077	22.2347657	0.051362309
11.79914446	×ÔÉí³µÁ¾	Road 1	106.9544645	60.99573669	-0.001694469	0.755327523	0.545098066	0	129.2366	978.9668	655.7349	3.9887	0.5457	677	2.081111337	0.004807367	22.2694507	0.051442431
11.81577474	×ÔÉí³µÁ¾	Road 1	107.2363841	61.0278511	-0.001694469	0.75482899	0.545098066	0	129.4738	978.9717	655.7349	3.9882	0.5463	678	1.792846901	0.004141476	22.29926625	0.051511305
11.83241383	×ÔÉí³µÁ¾	Road 1	107.5186013	61.05996552	-0.001694469	0.755550802	0.545098066	0	129.7112	978.9756	655.7349	3.9886	0.5459	679	1.793094001	0.004142047	22.32910169	0.051580225
11.84908957	×ÔÉí³µÁ¾	Road 1	107.8016846	61.11273422	-0.001686673	0.754583299	0.552941203	0	130.1014	978.9824	655.7349	3.9888	0.5457	680	2.445829282	0.005649866	22.3698877	0.051674441
11.86585218	×ÔÉí³µÁ¾	Road 1	108.0864032	61.14719696	-0.001686673	0.75575453	0.56078434	0	130.2372	978.9854	655.7349	3.9884	0.5462	681	1.861702879	0.004300534	22.40109471	0.051746529
11.88242382	×ÔÉí³µÁ¾	Road 1	108.3680378	61.18192062	-0.001686673	0.763798177	0.56078434	0	130.6109	978.9922	655.7349	3.9883	0.5462	682	1.883433999	0.004350733	22.43230629	0.051818628
11.89925021	×ÔÉí³µÁ¾	Road 1	108.6542315	61.23102264	-0.0017049	0.770581603	0.56078434	0	130.9678	978.999	655.7349	3.988	0.5466	683	2.31978412	0.005358701	22.47133989	0.051908795
11.93249832	×ÔÉí³µÁ¾	Road 1	109.220346	61.29708481	-0.0017444	0.774855494	0.56078434	0	131.4443	979.0078	655.7349	3.988	0.5459	684	1.828728117	0.004224362	22.53214164	0.052049247
11.94908792	×ÔÉí³µÁ¾	Road 1	109.5030457	61.34681168	-0.001826587	0.776718736	0.56078434	0	131.8019	979.0146	655.7349	3.9877	0.5462	685	2.365630828	0.005464607	22.57138651	0.052139903
11.96575449	×ÔÉí³µÁ¾	Road 1	109.7872219	61.38239365	-0.002126175	0.777421057	0.56078434	0	132.0576	979.0186	655.7349	3.9884	0.5455	686	1.909596268	0.004411167	22.60321294	0.052213422
11.9824119	×ÔÉí³µÁ¾	Road 1	110.0713957	61.41564789	-0.002265351	0.778103173	0.56078434	0	132.2963	979.0234	655.7349	3.9878	0.5461	687	1.836965166	0.00424339	22.63381202	0.052284106
11.99909241	×ÔÉí³µÁ¾	Road 1	110.3561949	61.46560135	-0.002430276	0.77872771	0.56078434	0	132.6547	979.0303	655.7349	3.9874	0.5465	688	2.368168035	0.005470468	22.67331426	0.052375356
12.01575422	×ÔÉí³µÁ¾	Road 1	110.6408401	61.50128632	-0.00259091	0.779019892	0.56078434	0	132.9108	979.0352	655.7349	3.9872	0.5467	689	1.916322564	0.004426705	22.70524366	0.052449113
12.03302561	×ÔÉí³µÁ¾	Road 1	110.9361391	61.55129471	-0.00274768	0.780465364	0.568627477	0	133.2697	979.042	655.7349	3.9868	0.5471	690	2.318266304	0.005355195	22.74528335	0.052541605
12.04911596	×ÔÉí³µÁ¾	Road 1	111.2113947	61.58474808	-0.00292748	0.783620298	0.568627477	0	133.509	979.0459	655.7349	3.9873	0.5466	691	1.885215331	0.004354847	22.77561712	0.052611676
12.06581442	×ÔÉí³µÁ¾	Road 1	111.4972092	61.61837311	-0.003081878	0.786753833	0.568627477	0	133.7486	979.0508	655.7349	3.9867	0.5462	692	1.851244328	0.004276374	22.80653006	0.052683084
12.08244324	×ÔÉí³µÁ¾	Road 1	111.7820656	61.66901321	-0.003219603	0.789000988	0.568627477	0	134.1081	979.0576	655.7349	3.9864	0.5465	693	2.401961647	0.005548531	22.84647185	0.05277535
12.11588343	×ÔÉí³µÁ¾	Road 1	112.3553548	61.71740112	-0.003359317	0.791266322	0.576470613	0	134.4508	979.0645	655.7349	3.9857	0.5471	694	1.551493373	0.00358395	22.89835407	0.052895198
12.13241804	×ÔÉí³µÁ¾	Road 1	112.6391436	61.78791962	-0.003467239	0.796964586	0.576470613	0	134.9482	979.0742	655.7349	3.9849	0.5479	695	3.056600904	0.007060748	22.94889379	0.053011945
12.18248705	×ÔÉí³µÁ¾	Road 1	113.5000968	61.90320053	-0.003652926	0.801714301	0.576470613	0	135.7554	979.0898	655.7349	3.9839	0.5478	696	2.012049773	0.004647835	23.04963512	0.053244657
12.19916279	×ÔÉí³µÁ¾	Road 1	113.7870013	61.93766327	-0.003718461	0.802380919	0.576470613	0	135.9962	979.0947	655.7349	3.9834	0.5484	697	1.887626766	0.004360418	23.08111269	0.05331737
12.21573039	×ÔÉí³µÁ¾	Road 1	114.0722837	61.98943634	-0.003849624	0.803144038	0.576470613	0	136.3576	979.1016	655.7349	3.9821	0.5486	698	2.455515968	0.005672242	23.12179471	0.053411346
12.23242959	×ÔÉí³µÁ¾	Road 1	114.3599923	62.02399521	-0.003865387	0.804891467	0.576470613	0	136.5987	979.1064	655.735	3.9816	0.5491	699	1.891368225	0.004369061	23.15337904	0.053484306
12.24908333	×ÔÉí³µÁ¾	Road 1	114.6470778	62.05858154	-0.003874414	0.804577887	0.576470613	0	136.8399	979.1113	655.735	3.981	0.5486	700	1.896168156	0.004380148	23.18495735	0.053557251
12.26580013	×ÔÉí³µÁ¾	Road 1	114.9355142	62.11544266	-0.003874414	0.805219829	0.576470613	0	137.2365	979.1191	655.735	3.9804	0.5493	701	2.608176041	0.006024887	23.22855768	0.053657968
12.28241319	×ÔÉí³µÁ¾	Road 1	115.2223434	62.1550209	-0.003874414	0.806328058	0.576470613	0	137.5126	979.125	655.735	3.9795	0.5501	702	2.062685294	0.004764803	23.26282519	0.053737126
12.29913658	×ÔÉí³µÁ¾	Road 1	115.5112499	62.19214783	-0.003874414	0.805796623	0.576470613	0	137.7716	979.1299	655.735	3.9793	0.5503	703	1.976560373	0.004565854	23.29587999	0.053813483
12.31575293	×ÔÉí³µÁ¾	Road 1	115.7984673	62.22678223	-0.003874414	0.805674732	0.576470613	0	138.0135	979.1348	655.735	3.9788	0.5498	704	1.904562141	0.004399539	23.32752687	0.053886587
12.33240008	×ÔÉí³µÁ¾	Road 1	116.0864687	62.28126068	-0.003874414	0.8063941	0.576470613	0	138.3939	979.1426	655.735	3.9778	0.5507	705	2.545028798	0.005879017	23.36989434	0.053984456
12.34908059	×ÔÉí³µÁ¾	Road 1	116.375208	62.31593628	-0.003874414	0.806466937	0.576470613	0	138.6361	979.1475	655.735	3.9773	0.5512	706	1.903875341	0.004397952	23.40165194	0.054057816
12.36579151	×ÔÉí³µÁ¾	Road 1	116.6646463	62.3530838	-0.003874414	0.806534529	0.576470613	0	138.8958	979.1523	655.735	3.9771	0.5513	707	1.982455528	0.004579472	23.43478061	0.054134343
12.382424	×ÔÉí³µÁ¾	Road 1	116.952966	62.4050354	-0.003874414	0.805548787	0.576470613	0	139.2596	979.1602	655.735	3.9759	0.5516	708	2.469184559	0.005703816	23.47584929	0.054229212
12.39908691	×ÔÉí³µÁ¾	Road 1	117.2419733	62.4396698	-0.003874414	0.805438817	0.576470613	0	139.5023	979.165	655.735	3.9754	0.552	709	1.906911302	0.004404965	23.50762398	0.054302611
12.41577401	×ÔÉí³µÁ¾	Road 1	117.5315607	62.47426987	-0.003874414	0.80493772	0.576470613	0	139.7451	979.1699	655.735	3.9749	0.5525	710	1.905065236	0.004400701	23.539414	0.054376046
12.43239293	×ÔÉí³µÁ¾	Road 1	117.8202158	62.52862473	-0.003874414	0.804771602	0.576470613	0	140.127	979.1787	655.7351	3.9731	0.5534	711	2.55293525	0.00589728	23.58184103	0.054474053
12.45054003	×ÔÉí³µÁ¾	Road 1	118.1356502	62.57552261	-0.003874414	0.803955555	0.576470613	0	140.4571	979.1855	655.7351	3.9722	0.5542	712	2.183712962	0.005044377	23.62146908	0.054565594
12.46597058	×ÔÉí³µÁ¾	Road 1	118.4040135	62.61008148	-0.003874414	0.804284751	0.576470613	0	140.7005	979.1904	655.7351	3.9708	0.5547	713	1.998445455	0.004616409	23.65230619	0.054636827
12.48245607	×ÔÉí³µÁ¾	Road 1	118.6908825	62.64464722	-0.003874414	0.803993881	0.576470613	0	140.944	979.1953	655.7351	3.9704	0.5551	714	1.922040319	0.004439913	23.68399198	0.054710021
12.49908856	×ÔÉí³µÁ¾	Road 1	118.9804688	62.67919235	-0.003874414	0.803865135	0.576470613	0	141.1876	979.2012	655.7351	3.9689	0.5556	715	1.912230142	0.004417252	23.71579712	0.054783491
12.51577896	×ÔÉí³µÁ¾	Road 1	119.2713151	62.73347855	-0.003874414	0.804185033	0.576470613	0	141.5707	979.209	655.7352	3.9681	0.5564	716	2.55049984	0.005891655	23.75836598	0.054881825
12.53244627	×ÔÉí³µÁ¾	Road 1	119.5619189	62.76799622	-0.003874414	0.803379059	0.576470613	0	141.8147	979.2139	655.7352	3.9677	0.5569	717	1.911268195	0.00441503	23.79022168	0.054955412
12.54908792	×ÔÉí³µÁ¾	Road 1	119.8522349	62.80252075	-0.003874414	0.803688407	0.576470613	0	142.0588	979.2197	655.7352	3.9663	0.5573	718	1.914110994	0.004421596	23.82207564	0.055028995
12.5657171	×ÔÉí³µÁ¾	Road 1	120.142584	62.85676575	-0.003874414	0.803332925	0.576470613	0	142.4427	979.2275	655.7352	3.9654	0.5582	719	2.560080601	0.005913786	23.8646477	0.055127336
12.58240164	×ÔÉí³µÁ¾	Road 1	120.4340595	62.89127655	-0.003876673	0.803412378	0.576470613	0	142.6871	979.2334	655.7352	3.964	0.5596	720	1.913047939	0.004419141	23.89656602	0.055201067
12.599121	×ÔÉí³µÁ¾	Road 1	120.7263036	62.92578049	-0.003876673	0.803290486	0.576470613	0	142.9317	979.2383	655.7352	3.9636	0.559	721	1.911367747	0.004415259	23.92852286	0.055274888
12.61577218	×ÔÉí³µÁ¾	Road 1	121.0176066	62.97997742	-0.003876673	0.80313617	0.576470613	0	143.3164	979.2471	655.7352	3.9618	0.5608	722	2.560598532	0.005914983	23.97115985	0.055373379
12.63241933	×ÔÉí³µÁ¾	Road 1	121.3089986	63.01446762	-0.003876673	0.802785516	0.576470613	0	143.5613	979.2529	655.7353	3.9604	0.5622	723	1.918063843	0.004430727	24.00309014	0.055447138
12.64906831	×ÔÉí³µÁ¾	Road 1	121.6006618	63.06617203	-0.003876673	0.803289771	0.576470613	0	143.9289	979.2607	655.7353	3.9593	0.5624	724	2.48240165	0.005734348	24.04441959	0.055542609
12.66579353	×ÔÉí³µÁ¾	Road 1	121.8938208	63.10065536	-0.003883455	0.803159118	0.576470613	0	144.1742	979.2656	655.7353	3.9589	0.5629	725	1.914780921	0.004423144	24.07644473	0.055616587
12.6824645	×ÔÉí³µÁ¾	Road 1	122.1861886	63.1351181	-0.003883455	0.803058445	0.58431375	0	144.4196	979.2715	655.7354	3.9575	0.5643	726	1.918648883	0.004432079	24.10843048	0.055690474
12.69908159	×ÔÉí³µÁ¾	Road 1	122.4777707	63.16964264	-0.003885717	0.805428326	0.58431375	0	144.6651	979.2773	655.7354	3.9561	0.5657	727	1.92522172	0.004447262	24.14042206	0.055764375
12.71577199	×ÔÉí³µÁ¾	Road 1	122.7708229	63.20925522	-0.003894776	0.808539569	0.58431375	0	144.9459	979.2832	655.7354	3.9544	0.5655	728	2.087684044	0.00482255	24.17526635	0.055844865
12.73237919	×ÔÉí³µÁ¾	Road 1	123.0626092	63.25154572	-0.003897042	0.811641634	0.58431375	0	145.2444	979.29	655.7354	3.953	0.5669	729	2.183463833	0.005043801	24.21152755	0.055928629
12.74911944	×ÔÉí³µÁ¾	Road 1	123.356919	63.29147415	-0.003897042	0.812732577	0.58431375	0	145.5256	979.2969	655.7354	3.9513	0.5687	730	2.096458954	0.00484282	24.2466228	0.056009699
12.76570721	×ÔÉí³µÁ¾	Road 1	123.6487435	63.33392258	-0.003903848	0.813194156	0.58431375	0	145.8245	979.3037	655.7354	3.9499	0.5701	731	2.192756776	0.005065268	24.28299574	0.05609372
12.78244343	×ÔÉí³µÁ¾	Road 1	123.9434239	63.38644409	-0.003903848	0.814058483	0.58431375	0	146.194	979.3115	655.7355	3.9488	0.5703	732	2.511346454	0.00580121	24.32502619	0.05619081
12.79904915	×ÔÉí³µÁ¾	Road 1	124.2359682	63.42145615	-0.003903848	0.814528167	0.58431375	0	146.4405	979.3174	655.7355	3.9474	0.5717	733	1.948562756	0.00450118	24.35738349	0.056265556
12.81572196	×ÔÉí³µÁ¾	Road 1	124.5299493	63.47654572	-0.003906119	0.814593017	0.58431375	0	146.8282	979.3262	655.7355	3.9457	0.5734	734	2.605457322	0.006018606	24.40082377	0.056365903
12.83238744	×ÔÉí³µÁ¾	Road 1	124.8239635	63.5115921	-0.003906119	0.815292656	0.58431375	0	147.075	979.332	655.7355	3.9444	0.5739	735	1.947888481	0.004499622	24.43328626	0.056440891
12.84904595	×ÔÉí³µÁ¾	Road 1	125.1180286	63.54917221	-0.003912935	0.814962685	0.58431375	0	147.3397	979.3379	655.7355	3.9433	0.5749	736	2.03282933	0.004695836	24.46715017	0.056519117
12.86571545	×ÔÉí³µÁ¾	Road 1	125.4125314	63.60174866	-0.003917484	0.814610183	0.58431375	0	147.7104	979.3467	655.7356	3.9413	0.577	737	2.527570275	0.005838687	24.50928352	0.056616445
12.88239669	×ÔÉí³µÁ¾	Road 1	125.7074038	63.63681564	-0.003917484	0.815084279	0.58431375	0	147.9578	979.3525	655.7356	3.9399	0.5774	738	1.950724473	0.004506174	24.54182402	0.056691613
12.89909589	×ÔÉí³µÁ¾	Road 1	126.0028376	63.68937836	-0.00392887	0.814505458	0.58431375	0	148.329	979.3613	655.7356	3.9379	0.5795	739	2.527102808	0.005837607	24.58402461	0.056789097
12.91570491	×ÔÉí³µÁ¾	Road 1	126.2967569	63.70689468	-0.003935713	0.814880311	0.58431375	0	148.4529	979.3643	655.7356	3.9372	0.5802	740	1.376046738	0.003178668	24.60687941	0.056841891
12.93239715	×ÔÉí³µÁ¾	Road 1	126.5924041	63.76198425	-0.00394028	0.81429249	0.58431375	0	148.7714	979.3721	655.7357	3.9342	0.5812	741	2.613709822	0.00603767	24.65050806	0.056942674
12.94905603	×ÔÉí³µÁ¾	Road 1	126.8876689	63.8070282	-0.003949422	0.814951181	0.58431375	0	149.1611	979.3818	655.7357	3.9311	0.584	742	2.286732032	0.005282351	24.68860245	0.057030672
12.96575632	×ÔÉí³µÁ¾	Road 1	127.1838304	63.84205399	-0.003956289	0.814459324	0.58431375	0	149.4092	979.3877	655.7357	3.9297	0.5853	743	1.953365618	0.004512275	24.72122424	0.057106028
12.9824152	×ÔÉí³µÁ¾	Road 1	127.4795004	63.89458923	-0.003965457	0.81467545	0.58431375	0	149.7817	979.3965	655.7357	3.9277	0.5874	744	2.537576352	0.005861801	24.76349741	0.057203679
12.99905245	×ÔÉí³µÁ¾	Road 1	127.7749485	63.92961502	-0.003976936	0.813971162	0.58431375	0	150.0302	979.4023	655.7358	3.9263	0.5878	745	1.960023512	0.004527654	24.79610682	0.057279007
13.01576888	×ÔÉí³µÁ¾	Road 1	128.0719651	63.96461334	-0.003983835	0.814030945	0.58431375	0	150.2788	979.4082	655.7358	3.925	0.5891	746	1.954514222	0.004514928	24.82877931	0.05735448
13.03241346	×ÔÉí³µÁ¾	Road 1	128.3678787	64.00213852	-0.00399535	0.814353645	0.58431375	0	150.5453	979.415	655.7358	3.923	0.5911	747	2.044402777	0.00472257	24.86280754	0.057433085
13.04911779	×ÔÉí³µÁ¾	Road 1	128.6651212	64.05961761	-0.004004578	0.813739359	0.58431375	0	150.9543	979.4248	655.7358	3.9207	0.5925	748	2.702313329	0.006242344	24.90794787	0.05753736
13.06570702	×ÔÉí³µÁ¾	Road 1	128.9604769	64.0946228	-0.004006887	0.814451098	0.58431375	0	151.2034	979.4307	655.7358	3.9193	0.5939	749	1.96699606	0.004543761	24.94057883	0.057612737
13.08242821	×ÔÉí³µÁ¾	Road 1	129.2583445	64.12961426	-0.004018446	0.81327039	0.58431375	0	151.4527	979.4375	655.7359	3.917	0.5962	750	1.958224932	0.0045235	24.97332268	0.057688375
13.09909076	×ÔÉí³µÁ¾	Road 1	129.5553639	64.17206955	-0.00402771	0.813376307	0.58431375	0	151.7199	979.4434	655.736	3.916	0.5972	751	2.211672929	0.005108964	25.01017478	0.057773504
13.11577126	×ÔÉí³µÁ¾	Road 1	129.8529235	64.21953735	-0.004039309	0.813353896	0.58431375	0	152.0942	979.4531	655.736	3.9131	0.5993	752	2.378221707	0.005493692	25.04984471	0.057865141
13.13241731	×ÔÉí³µÁ¾	Road 1	130.1501109	64.2719902	-0.004048605	0.813458979	0.58431375	0	152.4689	979.4619	655.736	3.9111	0.6013	753	2.549399398	0.005889113	25.09228214	0.057963172
13.14907252	×ÔÉí³µÁ¾	Road 1	130.4476236	64.30694733	-0.004067239	0.813508868	0.58431375	0	152.7188	979.4688	655.736	3.9088	0.6033	754	1.966272083	0.004542089	25.12503081	0.058038821
13.165727	×ÔÉí³µÁ¾	Road 1	130.7452849	64.34189072	-0.00408827	0.812775373	0.58431375	0	152.9689	979.4746	655.7361	3.9075	0.6033	755	1.96677079	0.004543241	25.15778636	0.058114486
13.18238294	×ÔÉí³µÁ¾	Road 1	131.043134	64.37682724	-0.004116425	0.813301265	0.58431375	0	153.2191	979.4814	655.7361	3.9043	0.6055	756	1.967344032	0.004544565	25.19055433	0.058190181
13.19910157	×ÔÉí³µÁ¾	Road 1	131.3423706	64.43422394	-0.004147071	0.81310153	0.58431375	0	153.6305	979.4912	655.7361	3.902	0.6078	757	2.711986943	0.00626469	25.23589503	0.058294918
13.21570913	×ÔÉí³µÁ¾	Road 1	131.6397804	64.46914673	-0.00418262	0.812591612	0.58431375	0	153.881	979.498	655.7362	3.8997	0.6091	758	1.972678902	0.004556888	25.26865641	0.058370596
13.23241053	×ÔÉí³µÁ¾	Road 1	131.9391135	64.52151031	-0.004227941	0.812160432	0.58431375	0	154.2571	979.5078	655.7362	3.8968	0.612	759	2.549336617	0.005888968	25.31123389	0.05846895
13.24912952	×ÔÉí³µÁ¾	Road 1	132.2389241	64.55640564	-0.004283239	0.812710643	0.58431375	0	154.508	979.5137	655.7362	3.8955	0.6133	760	1.966210257	0.004541946	25.34410695	0.058544887
13.26571765	×ÔÉí³µÁ¾	Road 1	132.5365489	64.59132156	-0.004336582	0.813414574	0.58431375	0	154.7591	979.5205	655.7363	3.8932	0.6146	761	1.976992779	0.004566853	25.37690157	0.058620643
13.28254038	×ÔÉí³µÁ¾	Road 1	132.8386275	64.64365768	-0.004392821	0.812134862	0.58431375	0	155.1359	979.5303	655.7363	3.8903	0.6176	762	2.540057559	0.005867533	25.41963226	0.058719351
13.29942579	×ÔÉí³µÁ¾	Road 1	133.1419953	64.67857361	-0.004479331	0.812666416	0.58431375	0	155.3873	979.5371	655.7363	3.8881	0.6199	763	1.958550835	0.004524252	25.45270319	0.058795744
13.3157588	×ÔÉí³µÁ¾	Road 1	133.4356081	64.71594086	-0.004561932	0.811692119	0.58431375	0	155.6568	979.5439	655.7364	3.8861	0.6218	764	2.082503089	0.004810582	25.48671674	0.058874316
13.33251151	×ÔÉí³µÁ¾	Road 1	133.736928	64.75080872	-0.004655746	0.812417328	0.58431375	0	155.9084	979.5498	655.7364	3.8849	0.6222	765	1.967961458	0.004545991	25.51968544	0.058950473
13.34911394	×ÔÉí³µÁ¾	Road 1	134.035809	64.80808868	-0.004743079	0.811529696	0.58431375	0	156.3222	979.5615	655.7365	3.8807	0.6264	766	2.735503883	0.006319014	25.56510144	0.059055384
13.36571307	×ÔÉí³µÁ¾	Road 1	134.3347914	64.84295654	-0.004836733	0.812065601	0.58431375	0	156.5742	979.5674	655.7365	3.8794	0.6277	767	1.981124286	0.004576397	25.59798638	0.059131349
13.38240787	×ÔÉí³µÁ¾	Road 1	134.6357394	64.895224	-0.004928959	0.811465025	0.58431375	0	156.9525	979.5781	655.7366	3.8756	0.6306	768	2.559837027	0.005913224	25.64072234	0.059230069
13.39912173	×ÔÉí³µÁ¾	Road 1	134.9371697	64.92757874	-0.005033098	0.811577201	0.58431375	0	157.0786	979.5811	655.7366	3.8739	0.6313	769	1.89088604	0.004367947	25.67232635	0.059303074
13.41628829	×ÔÉí³µÁ¾	Road 1	135.2469541	64.96491165	-0.005127796	0.811592758	0.58431375	0	157.4573	979.5908	655.7366	3.8711	0.6342	770	2.025889403	0.004679805	25.7071039	0.05938341
13.4323966	×ÔÉí³µÁ¾	Road 1	135.5378753	65.01715851	-0.005215409	0.811196506	0.58431375	0	157.8363	979.6016	655.7367	3.8672	0.6371	771	2.627388191	0.006069267	25.74942668	0.059481176
13.44903935	×ÔÉí³µÁ¾	Road 1	135.8386327	65.05694962	-0.005315161	0.81103766	0.58431375	0	158.1252	979.6094	655.7367	3.8647	0.6397	772	2.149799143	0.004966036	25.78520525	0.059563824
13.46583788	×ÔÉí³µÁ¾	Road 1	136.142391	65.09673386	-0.00538799	0.811532855	0.58431375	0	158.4144	979.6172	655.7368	3.8621	0.6422	773	2.138231021	0.004939314	25.8211244	0.059646797
13.48240585	×ÔÉí³µÁ¾	Road 1	136.4421403	65.13154678	-0.005461481	0.810351789	0.58431375	0	158.6675	979.624	655.7368	3.8599	0.6435	774	1.988965403	0.00459451	25.85407752	0.059722919
13.49906473	×ÔÉí³µÁ¾	Road 1	136.7437758	65.18372498	-0.005529909	0.810994804	0.58431375	0	159.0475	979.6348	655.7368	3.856	0.6474	775	2.570672026	0.005938252	25.89690203	0.059821844
13.51571555	×ÔÉí³µÁ¾	Road 1	137.0454262	65.21852417	-0.00559025	0.8102054	0.58431375	0	159.3009	979.6416	655.7369	3.8538	0.6487	776	1.984866179	0.004585041	25.92995167	0.059898188
13.53236782	×ÔÉí³µÁ¾	Road 1	137.347264	65.25330276	-0.005651029	0.810318112	0.58431375	0	159.5545	979.6484	655.7369	3.8515	0.6509	777	1.984963869	0.004585267	25.96300584	0.059974543
13.54906409	×ÔÉí³µÁ¾	Road 1	137.650141	65.30543976	-0.005703474	0.808901787	0.576470613	0	159.9352	979.6592	655.7369	3.8476	0.6548	778	2.569564899	0.005935695	26.00590798	0.060073647
13.56575852	×ÔÉí³µÁ¾	Road 1	137.9531452	65.34006729	-0.005753303	0.806138635	0.576470613	0	160.1891	979.666	655.737	3.8454	0.656	779	1.979120929	0.004571769	26.03894828	0.060149971
13.5824229	×ÔÉí³µÁ¾	Road 1	138.2558431	65.3917305	-0.00579751	0.801471531	0.576470613	0	160.5703	979.6768	655.7371	3.8415	0.6599	780	2.559886353	0.005913337	26.08160719	0.060248513
13.59911917	×ÔÉí³µÁ¾	Road 1	138.5592793	65.42601471	-0.005844913	0.799939811	0.576470613	0	160.8246	979.6836	655.7371	3.8383	0.6621	781	1.96958101	0.004549732	26.11449184	0.060324476
13.61569483	×ÔÉí³µÁ¾	Road 1	138.8606813	65.46024399	-0.005889588	0.799198568	0.576470613	0	161.079	979.6914	655.7372	3.8351	0.6643	782	1.977030117	0.00456694	26.14726243	0.060400176
13.63234601	×ÔÉí³µÁ¾	Road 1	139.1636258	65.49686279	-0.005928489	0.797849	0.576470613	0	161.3517	979.6992	655.7372	3.8322	0.6672	783	2.053852293	0.004744399	26.1814615	0.060479176
13.6491013	×ÔÉí³µÁ¾	Road 1	139.4687139	65.55051041	-0.005967561	0.797952712	0.576470613	0	161.752	979.71	655.7372	3.8287	0.6697	784	2.622888306	0.006058872	26.22540873	0.060580694
13.66595371	×ÔÉí³µÁ¾	Road 1	139.775719	65.5821785	-0.00600378	0.796760321	0.576470613	0	161.9886	979.7168	655.7373	3.8261	0.6723	785	1.874848264	0.004330899	26.25700446	0.06065368
13.68240842	×ÔÉí³µÁ¾	Road 1	140.0757124	65.63328552	-0.006034074	0.796800852	0.576470613	0	162.3712	979.7285	655.7374	3.8213	0.6761	786	2.57147777	0.005940114	26.29931737	0.060751423
13.69912301	×ÔÉí³µÁ¾	Road 1	140.3806021	65.66733627	-0.006061425	0.796066046	0.576470613	0	162.6264	979.7354	655.7374	3.8191	0.6783	787	1.966540575	0.004542709	26.33218729	0.060827353
13.71573497	×ÔÉí³µÁ¾	Road 1	140.6837879	65.70381088	-0.006079706	0.796338439	0.576470613	0	162.9	979.7432	655.7374	3.8162	0.6812	788	2.057416434	0.004752632	26.36636501	0.060906303
13.73243417	×ÔÉí³µÁ¾	Road 1	140.9887237	65.73782043	-0.006107195	0.794799507	0.576470613	0	163.1554	979.751	655.7375	3.813	0.6834	789	1.967995527	0.00454607	26.39922896	0.060982219
13.74903183	×ÔÉí³µÁ¾	Road 1	141.2919959	65.77912216	-0.006128632	0.795864403	0.576470613	0	163.4476	979.7598	655.7375	3.8095	0.6868	790	2.225734585	0.005141447	26.43617095	0.061067555
13.76568521	×ÔÉí³µÁ¾	Road 1	141.5965107	65.82768173	-0.006147048	0.794431746	0.576470613	0	163.8313	979.7715	655.7376	3.8038	0.6906	791	2.470181343	0.005706119	26.47730782	0.061162581
13.78235875	×ÔÉí³µÁ¾	Road 1	141.9015741	65.86653214	-0.006159345	0.795764387	0.576470613	0	164.0872	979.7783	655.7377	3.8016	0.6928	792	2.138215614	0.004939278	26.51295944	0.061244936
13.79902679	×ÔÉí³µÁ¾	Road 1	142.2067615	65.91505051	-0.006183988	0.794566512	0.576470613	0	164.4897	979.791	655.7377	3.7961	0.6972	793	2.470194968	0.00570615	26.55413275	0.061340047
13.81578684	×ÔÉí³µÁ¾	Road 1	142.5137916	65.94900513	-0.006196335	0.794019282	0.576470613	0	164.746	979.7988	655.7378	3.7929	0.7003	794	1.967275006	0.004544405	26.58710437	0.061416211
13.8323944	×ÔÉí³µÁ¾	Road 1	142.8181849	65.98295975	-0.006202514	0.794342637	0.576470613	0	165.0024	979.8066	655.7379	3.7898	0.7035	795	1.978737942	0.004570885	26.61996638	0.061492122
13.8490958	×ÔÉí³µÁ¾	Road 1	143.1244669	66.01933136	-0.006214885	0.794227481	0.576470613	0	165.2773	979.8145	655.7379	3.7869	0.7053	796	2.055634218	0.004748515	26.65429834	0.061571429
13.86568466	×ÔÉí³µÁ¾	Road 1	143.428875	66.06053009	-0.006214885	0.793684244	0.576470613	0	165.589	979.8242	655.7379	3.7828	0.7094	797	2.231185713	0.005154039	26.69131118	0.061656929
13.88238093	×ÔÉí³µÁ¾	Road 1	143.7355125	66.11627197	-0.006224174	0.794074357	0.576470613	0	166.011	979.8369	655.738	3.7777	0.7135	798	2.721017454	0.00628555	26.73674201	0.061761874
13.89907756	×ÔÉí³µÁ¾	Road 1	144.0423141	66.15020599	-0.006224174	0.793778241	0.576470613	0	166.2681	979.8447	655.738	3.7745	0.7166	799	1.976055181	0.004564687	26.76973548	0.061838089
13.91573057	×ÔÉí³µÁ¾	Road 1	144.348471	66.18411255	-0.006224174	0.793691814	0.576470613	0	166.5253	979.8525	655.7382	3.7704	0.7188	800	1.979015658	0.004571526	26.80269205	0.061914219
13.93242317	×ÔÉí³µÁ¾	Road 1	144.6556028	66.23740311	-0.006224174	0.793519199	0.576470613	0	166.9297	979.8652	655.7382	3.765	0.7241	801	2.6418824	0.006102748	26.84679194	0.062016089
13.94901974	×ÔÉí³µÁ¾	Road 1	144.9611239	66.2713028	-0.006224174	0.793585658	0.576470613	0	167.1873	979.873	655.7383	3.7618	0.7263	802	1.984956308	0.004585249	26.87973539	0.062092189
13.96574459	×ÔÉí³µÁ¾	Road 1	145.2691754	66.30761261	-0.006224174	0.793851554	0.576470613	0	167.4634	979.8818	655.7383	3.758	0.73	803	2.059435778	0.004757297	26.91417916	0.062171754
13.98237598	×ÔÉí³µÁ¾	Road 1	145.57574	66.35844498	-0.006224174	0.793287873	0.576470613	0	167.8501	979.8945	655.7384	3.7523	0.7347	804	2.568204529	0.005932552	26.95689196	0.06227042
13.99909094	×ÔÉí³µÁ¾	Road 1	145.8840026	66.39232407	-0.006224174	0.79317224	0.576470613	0	168.1081	979.9023	655.7385	3.7492	0.7379	805	1.979027917	0.004571554	26.98997134	0.062346834
14.01569593	×ÔÉí³µÁ¾	Road 1	146.1904045	66.42862015	-0.006224174	0.792227924	0.576470613	0	168.3847	979.9111	655.7385	3.7454	0.7406	806	2.071166909	0.004784396	27.02436305	0.062426279
14.03235261	×ÔÉí³µÁ¾	Road 1	146.4979951	66.47941132	-0.006224174	0.792887866	0.576470613	0	168.7722	979.9238	655.7386	3.7397	0.7463	807	2.568255289	0.00593267	27.06714165	0.062525097
14.04904338	×ÔÉí³µÁ¾	Road 1	146.8063722	66.51328354	-0.006224174	0.792552292	0.576470613	0	169.0306	979.9316	655.7386	3.7366	0.7484	808	1.983539394	0.004581976	27.10024845	0.062601574
14.06572462	×ÔÉí³µÁ¾	Road 1	147.1147412	66.54953156	-0.006224174	0.792238832	0.576470613	0	169.3077	979.9414	655.7387	3.7309	0.7532	809	2.066990829	0.004774749	27.13472841	0.062681223
14.0823516	×ÔÉí³µÁ¾	Road 1	147.4223531	66.60271912	-0.006224174	0.792877555	0.576470613	0	169.7143	979.9541	655.7388	3.7256	0.7575	810	2.658488241	0.006141108	27.17893106	0.062783331
14.09904201	×ÔÉí³µÁ¾	Road 1	147.7312949	66.63655014	-0.006224174	0.792141914	0.576470613	0	169.9733	979.9629	655.7389	3.7215	0.7616	811	1.985264882	0.004585962	27.21206593	0.062859872
14.11566496	×ÔÉí³µÁ¾	Road 1	148.0391445	66.6703537	-0.006224174	0.7924667	0.576470613	0	170.2324	979.9707	655.7389	3.7184	0.7647	812	1.98990577	0.004596682	27.24514404	0.062936283
14.13235499	×ÔÉí³µÁ¾	Road 1	148.3484267	66.7114357	-0.006224174	0.791892886	0.576470613	0	170.5101	979.9805	655.739	3.7136	0.7684	813	2.237512315	0.005168653	27.2824882	0.063022548
14.14904466	×ÔÉí³µÁ¾	Road 1	148.6579149	66.75731735	-0.006202514	0.792160034	0.58431375	0	170.8991	979.9932	655.7391	3.708	0.774	814	2.404678812	0.005554808	27.32262149	0.063115256
14.16575779	×ÔÉí³µÁ¾	Road 1	148.9680293	66.79849548	-0.006187073	0.795285702	0.58431375	0	171.1587	980.002	655.7391	3.7039	0.7771	815	2.24139693	0.005177627	27.36008224	0.06320179
14.18236132	×ÔÉí³µÁ¾	Road 1	149.2763122	66.8423378	-0.006156269	0.799624383	0.58431375	0	171.5482	980.0146	655.7393	3.6983	0.7827	816	2.344693414	0.005416242	27.39901242	0.063291719
14.19908214	×ÔÉí³µÁ¾	Road 1	149.586932	66.87655334	-0.006107195	0.800742507	0.58431375	0	171.8081	980.0234	655.7393	3.6942	0.7858	817	2.002488709	0.004625749	27.43249569	0.063369065
14.21572269	×ÔÉí³µÁ¾	Road 1	149.896219	66.91084442	-0.006061425	0.802284718	0.58431375	0	172.0681	980.0322	655.7394	3.6892	0.7899	818	2.011691749	0.004647008	27.46597135	0.063446394
14.23234638	×ÔÉí³µÁ¾	Road 1	150.2054417	66.96478729	-0.00600378	0.802272916	0.58431375	0	172.4769	980.0459	655.7394	3.683	0.7952	819	2.697953783	0.006232273	27.51082129	0.063549997
14.24909177	×ÔÉí³µÁ¾	Road 1	150.517088	66.99914703	-0.005934489	0.80342263	0.58431375	0	172.7373	980.0547	655.7395	3.6789	0.7992	820	2.008856221	0.004640458	27.54446036	0.063627703
14.26576897	×ÔÉí³µÁ¾	Road 1	150.8277043	67.05072784	-0.00587169	0.803874254	0.58431375	0	173.128	980.0684	655.7396	3.6723	0.8049	821	2.612995419	0.006036019	27.58803782	0.063728367
14.28233951	×ÔÉí³µÁ¾	Road 1	151.1364922	67.08512192	-0.00579751	0.804194927	0.58431375	0	173.3887	980.0771	655.7397	3.6683	0.8089	822	2.024798895	0.004677285	27.62158982	0.063805872
14.29908379	×ÔÉí³µÁ¾	Road 1	151.4486778	67.11951599	-0.005729819	0.803899109	0.58431375	0	173.6495	980.0859	655.7397	3.6642	0.812	823	2.013193709	0.004650477	27.65529931	0.063883741
14.33242207	×ÔÉí³µÁ¾	Road 1	152.0710891	67.21043472	-0.005651029	0.803986609	0.58431375	0	174.3394	980.1104	655.7399	3.6523	0.823	824	2.405693593	0.005557152	27.735501	0.064069007
14.34904136	×ÔÉí³µÁ¾	Road 1	152.3815228	67.24483566	-0.005587367	0.803609192	0.58431375	0	174.6007	980.1191	655.74	3.6483	0.8271	825	2.025608515	0.004679156	27.76916518	0.064146772
14.36569364	×ÔÉí³µÁ¾	Road 1	152.6928114	67.29644394	-0.005452967	0.804166377	0.58431375	0	174.9929	980.1328	655.7401	3.6408	0.8327	826	2.625124121	0.006064037	27.81287948	0.064247752
14.38237781	×ÔÉí³µÁ¾	Road 1	153.0048557	67.33084488	-0.005402071	0.804067075	0.58431375	0	175.2545	980.1416	655.7402	3.6367	0.8367	827	2.023133483	0.004673438	27.84663378	0.064325724
14.39902826	×ÔÉí³µÁ¾	Road 1	153.3164396	67.36769028	-0.005351493	0.803723752	0.58431375	0	175.535	980.1523	655.7402	3.6311	0.8424	828	2.11193356	0.004878567	27.88179842	0.064406954
14.41702873	×ÔÉí³µÁ¾	Road 1	153.6534588	67.40207062	-0.005323531	0.80360502	0.58431375	0	175.7969	980.1611	655.7403	3.627	0.8455	829	1.93648661	0.004473284	27.91665609	0.064487476
14.4325982	×ÔÉí³µÁ¾	Road 1	153.9451859	67.45363083	-0.005301232	0.80341208	0.58431375	0	176.19	980.1748	655.7404	3.6205	0.852	830	2.754354149	0.006362558	27.95953993	0.064586537
14.45093224	×ÔÉí³µÁ¾	Road 1	154.2889004	67.49042816	-0.005287326	0.80330646	0.58431375	0	176.4709	980.1855	655.7405	3.6149	0.8567	831	1.99521957	0.004608957	27.99612037	0.064671038
14.4659966	×ÔÉí³µÁ¾	Road 1	154.5714712	67.52726669	-0.005287326	0.803608716	0.58431375	0	176.752	980.1953	655.7406	3.6102	0.8614	832	2.251888198	0.005201862	28.03004362	0.064749401
14.48241099	×ÔÉí³µÁ¾	Road 1	154.8796	67.57877197	-0.005287326	0.802996695	0.58431375	0	177.1458	980.209	655.7407	3.6037	0.867	833	2.657441692	0.00613869	28.07366389	0.064850164
14.49909479	×ÔÉí³µÁ¾	Road 1	155.1929457	67.61313858	-0.005287326	0.802876353	0.58431375	0	177.4085	980.2188	655.7407	3.5987	0.872	834	2.029183906	0.004687415	28.10751839	0.064928367
14.51567559	×ÔÉí³µÁ¾	Road 1	155.504515	67.64747772	-0.005287326	0.803158879	0.58431375	0	177.6714	980.2285	655.7408	3.5937	0.877	835	2.036573264	0.004704484	28.14128641	0.065006372
14.53234107	×ÔÉí³µÁ¾	Road 1	155.817925	67.70140686	-0.005276219	0.803018451	0.58431375	0	178.0847	980.2432	655.741	3.5856	0.8832	836	2.719099584	0.00628112	28.18660149	0.065111049
14.55041228	×ÔÉí³µÁ¾	Road 1	156.1579437	67.73573914	-0.005267899	0.802880287	0.58431375	0	178.3479	980.2529	655.741	3.5806	0.8882	837	1.938657353	0.004478298	28.22163539	0.065191978
14.56673136	×ÔÉí³µÁ¾	Road 1	156.4652394	67.78964767	-0.005251286	0.802741587	0.58431375	0	178.7617	980.2676	655.7411	3.5735	0.8944	838	2.761738746	0.006379617	28.26670443	0.065296087
14.58234849	×ÔÉí³µÁ¾	Road 1	156.7594659	67.82395248	-0.005218163	0.802645743	0.58431375	0	179.0252	980.2773	655.7412	3.5685	0.8994	839	2.114702359	0.004884962	28.29973	0.065372376
14.59904842	×ÔÉí³µÁ¾	Road 1	157.0742514	67.85824356	-0.005174217	0.802305937	0.58431375	0	179.2889	980.2871	655.7413	3.5635	0.9034	840	2.031636173	0.00469308	28.33365818	0.06545075
14.61568567	×ÔÉí³µÁ¾	Road 1	157.3880933	67.90970078	-0.005116913	0.802134871	0.58431375	0	179.6846	980.3018	655.7414	3.5561	0.9109	841	2.64263647	0.00610449	28.37762439	0.065552312
14.63239037	×ÔÉí³µÁ¾	Road 1	157.7033665	67.94397812	-0.005043861	0.802047074	0.58431375	0	179.9486	980.3115	655.7415	3.5511	0.9159	842	2.032998054	0.004696226	28.41158501	0.065630761
14.64903238	×ÔÉí³µÁ¾	Road 1	158.0176153	67.97827606	-0.004950203	0.802594543	0.58431375	0	180.2127	980.3213	655.7416	3.5461	0.9199	843	2.039138948	0.004710411	28.44552039	0.065709152
14.66574111	×ÔÉí³µÁ¾	Road 1	158.3333624	68.02969894	-0.004847214	0.801814675	0.58431375	0	180.6091	980.3359	655.7417	3.5387	0.9274	844	2.637794311	0.006093305	28.48959458	0.065810963
14.68240989	×ÔÉí³µÁ¾	Road 1	158.6485245	68.06640701	-0.004737912	0.802344203	0.58431375	0	180.8925	980.3467	655.7418	3.5331	0.9321	845	2.124455561	0.004907492	28.52500665	0.065892765
14.69903651	×ÔÉí³µÁ¾	Road 1	158.9631157	68.11536484	-0.004612484	0.802039862	0.58431375	0	181.2705	980.3613	655.7419	3.5243	0.9399	846	2.562473251	0.005919313	28.56761192	0.065991184
14.71580169	×ÔÉí³µÁ¾	Road 1	159.280488	68.14960785	-0.00450176	0.801075935	0.58431375	0	181.5353	980.3711	655.7419	3.5194	0.9449	847	2.032679714	0.00469549	28.60169016	0.066069904
14.73244077	×ÔÉí³µÁ¾	Road 1	159.5956315	68.18383713	-0.004390365	0.801383376	0.58431375	0	181.8002	980.3809	655.7421	3.5144	0.9489	848	2.042182453	0.004717441	28.6356702	0.066148398
14.7490168	×ÔÉí³µÁ¾	Road 1	159.9098174	68.23520508	-0.00426395	0.801234424	0.58431375	0	182.1978	980.3965	655.7422	3.506	0.9573	849	2.657428181	0.006138659	28.67971983	0.066250153
14.76574716	×ÔÉí³µÁ¾	Road 1	160.2270874	68.26943436	-0.004161267	0.801560998	0.58431375	0	182.463	980.4063	655.7422	3.501	0.9613	850	2.037750325	0.004707203	28.71381211	0.066328906
14.78234629	×ÔÉí³µÁ¾	Road 1	160.5420267	68.3036705	-0.004055586	0.801872075	0.58431375	0	182.7284	980.416	655.7423	3.4961	0.9662	851	2.048411056	0.00473183	28.74781395	0.06640745
14.79901653	×ÔÉí³µÁ¾	Road 1	160.8585529	68.35499725	-0.00394028	0.800673425	0.58431375	0	183.1267	980.4316	655.7424	3.4877	0.9746	852	2.649768205	0.006120965	28.79198623	0.066509488
14.81573882	×ÔÉí³µÁ¾	Road 1	161.1762263	68.3892128	-0.003847375	0.801198184	0.58431375	0	183.3924	980.4414	655.7426	3.4828	0.9786	853	2.040897588	0.004714473	28.82611471	0.066588325
14.83232182	×ÔÉí³µÁ¾	Road 1	161.49149	68.44052582	-0.003760369	0.80064255	0.58431375	0	183.7912	980.457	655.7427	3.4744	0.9869	854	2.66179653	0.00614875	28.87025528	0.06669029
14.84900819	×ÔÉí³µÁ¾	Road 1	161.8088886	68.47714462	-0.003665971	0.800706863	0.58431375	0	184.0762	980.4678	655.7427	3.4688	0.9925	855	2.130929286	0.004922447	28.90581275	0.066772427
14.86572718	×ÔÉí³µÁ¾	Road 1	162.1270665	68.51133957	-0.00357959	0.801018238	0.58431375	0	184.3424	980.4775	655.7429	3.4639	0.9965	856	2.043516813	0.004720524	28.9399783	0.06685135
14.88237616	×ÔÉí³µÁ¾	Road 1	162.4441492	68.56261139	-0.003498794	0.800049305	0.58431375	0	184.7419	980.4932	655.743	3.4555	1.0048	857	2.657282464	0.006138322	28.98421934	0.066953547
14.89904714	×ÔÉí³µÁ¾	Road 1	162.7618089	68.59677887	-0.003423381	0.800760031	0.58431375	0	185.0084	980.5039	655.743	3.4487	1.0107	858	2.048206807	0.004731358	29.01836494	0.067032423
14.91568585	×ÔÉí³µÁ¾	Road 1	163.0790119	68.63094635	-0.003361371	0.800250888	0.58431375	0	185.2751	980.5137	655.7432	3.4437	1.0147	859	2.051433752	0.004738812	29.05249817	0.067111271
14.9323363	×ÔÉí³µÁ¾	Road 1	163.3966755	68.6821701	-0.003298085	0.799673378	0.58431375	0	185.6753	980.5293	655.7433	3.4354	1.023	860	2.659521222	0.006143494	29.09678038	0.067213563
14.94907729	×ÔÉí³µÁ¾	Road 1	163.7162365	68.71876144	-0.003237603	0.800605834	0.58431375	0	185.9613	980.541	655.7433	3.4289	1.0295	861	2.132166318	0.004925304	29.13247495	0.067296017
14.96572663	×ÔÉí³µÁ¾	Road 1	164.0342063	68.75291519	-0.003177864	0.800269127	0.58431375	0	186.2284	980.5508	655.7435	3.4239	1.0335	862	2.053278238	0.004743073	29.16666069	0.067374986
14.98237268	×ÔÉí³µÁ¾	Road 1	164.352361	68.80654221	-0.003134525	0.799690306	0.58431375	0	186.6484	980.5674	655.7436	3.415	1.0424	863	2.750061368	0.006352642	29.21243834	0.067480733
14.9991023	×ÔÉí³µÁ¾	Road 1	164.6722717	68.84067535	-0.003085757	0.799989045	0.58431375	0	186.9159	980.5781	655.7437	3.4091	1.0483	864	2.048929939	0.004733028	29.24671617	0.067559914
15.01567467	×ÔÉí³µÁ¾	Road 1	164.9893325	68.87480164	-0.003045185	0.799707651	0.58431375	0	187.1835	980.5889	655.7437	3.4032	1.0542	865	2.06107103	0.004761074	29.280873	0.067638817
15.0324076	×ÔÉí³µÁ¾	Road 1	165.3097142	68.92844925	-0.003006878	0.800423205	0.58431375	0	187.6042	980.6055	655.7435	3.3942	1.0622	866	2.745176927	0.006341359	29.32680783	0.067744926
15.04904924	×ÔÉí³µÁ¾	Road 1	165.6285065	68.96263733	-0.002970784	0.801640928	0.58431375	0	187.8721	980.6152	655.7433	3.3893	1.0671	867	2.060421579	0.004759574	29.36109665	0.067824133
15.06569273	×ÔÉí³µÁ¾	Road 1	165.947492	68.99685974	-0.002938736	0.802446246	0.58431375	0	188.1402	980.626	655.743	3.3835	1.0729	868	2.06238985	0.004764121	29.39542199	0.067903425
15.08231495	×ÔÉí³µÁ¾	Road 1	166.2663076	69.04828949	-0.002914384	0.80435735	0.58431375	0	188.5425	980.6416	655.7426	3.3752	1.0803	869	2.682607932	0.006196824	29.4400129	0.06800643
15.09901268	×ÔÉí³µÁ¾	Road 1	166.5867423	69.08512115	-0.002897605	0.806524992	0.58431375	0	188.8301	980.6533	655.7421	3.3687	1.0868	870	2.153903764	0.004975518	29.47597821	0.06808951
15.11566606	×ÔÉí³µÁ¾	Road 1	166.9064853	69.11961136	-0.002880889	0.808484912	0.58431375	0	189.0986	980.6641	655.7415	3.3628	1.0926	871	2.074396575	0.004791856	29.51052392	0.06816931
15.13231981	×ÔÉí³µÁ¾	Road 1	167.2263956	69.15423203	-0.002871631	0.811302841	0.58431375	0	189.3672	980.6748	655.741	3.3569	1.0985	872	2.079937642	0.004804656	29.54516267	0.068249326
15.14900727	×ÔÉí³µÁ¾	Road 1	167.5472182	69.21129913	-0.002864239	0.814577162	0.58431375	0	189.8089	980.6924	655.7397	3.3464	1.108	873	2.882900614	0.0066595	29.59327098	0.068360456
15.16577209	×ÔÉí³µÁ¾	Road 1	167.8697021	69.24873505	-0.002856859	0.818267941	0.58431375	0	190.0971	980.7041	655.739	3.3399	1.1135	874	2.174572795	0.005023263	29.62972729	0.06844467
15.18235215	×ÔÉí³µÁ¾	Road 1	168.1887938	69.28379517	-0.002856859	0.819654346	0.58431375	0	190.3663	980.7148	655.738	3.3341	1.1194	875	2.104664614	0.004861775	29.66462277	0.068525279
15.19899637	×ÔÉí³µÁ¾	Road 1	168.5092824	69.31893082	-0.002851333	0.822253168	0.58431375	0	190.6356	980.7256	655.7371	3.3282	1.1252	876	2.103416206	0.004858891	29.69963248	0.068606151
15.21565011	×ÔÉí³µÁ¾	Road 1	168.8301996	69.37189178	-0.002851333	0.826604128	0.58431375	0	191.0398	980.7412	655.7356	3.3199	1.1335	877	2.74534782	0.006341753	29.74535281	0.068711765
15.23234418	×ÔÉí³µÁ¾	Road 1	169.1520582	69.40734329	-0.002849492	0.828200817	0.58431375	0	191.3094	980.752	655.7345	3.3141	1.1384	878	2.113279556	0.004881676	29.78063204	0.06879326
15.24903385	×ÔÉí³µÁ¾	Road 1	169.4740912	69.46325684	-0.002842138	0.832523108	0.58431375	0	191.7334	980.7695	655.7325	3.3042	1.1483	879	2.850578033	0.006584835	29.82820724	0.068903159
15.26569053	×ÔÉí³µÁ¾	Road 1	169.7956528	69.49897614	-0.002827467	0.835581958	0.58431375	0	192.0034	980.7803	655.7312	3.2983	1.1541	880	2.128187268	0.004916113	29.86365577	0.068985045
15.28240182	×ÔÉí³µÁ¾	Road 1	170.118519	69.55284348	-0.002811023	0.838241994	0.58431375	0	192.4087	980.7969	655.729	3.2891	1.1633	881	2.777723543	0.006416541	29.91007512	0.069092274
15.29905447	×ÔÉí³µÁ¾	Road 1	170.4404187	69.58887177	-0.00278557	0.841290593	0.58431375	0	192.679	980.8076	655.7275	3.2833	1.1692	882	2.142017578	0.004948061	29.94574539	0.069174672
15.31567632	×ÔÉí³µÁ¾	Road 1	170.76189	69.62501678	-0.002762074	0.843887389	0.58431375	0	192.9495	980.8184	655.726	3.2774	1.174	883	2.149608674	0.004965596	29.98147587	0.069257209
15.33235023	×ÔÉí³µÁ¾	Road 1	171.0846203	69.67948151	-0.002733337	0.845883191	0.58431375	0	193.3555	980.835	655.7234	3.2682	1.1832	884	2.808144325	0.006486813	30.0282986	0.06936537
15.34900434	×ÔÉí³µÁ¾	Road 1	171.4071482	69.71852417	-0.002695923	0.849784493	0.58431375	0	193.6456	980.8467	655.7216	3.2618	1.1897	885	2.25432946	0.005207501	30.06584246	0.069452096
15.36564123	×ÔÉí³µÁ¾	Road 1	171.7295112	69.75506744	-0.002655339	0.852202237	0.58431375	0	193.9166	980.8574	655.7197	3.2559	1.1955	886	2.166303137	0.00500416	30.10188299	0.06953535
15.38234849	×ÔÉí³µÁ¾	Road 1	172.0534936	69.81016388	-0.002613427	0.856158018	0.58431375	0	194.3234	980.874	655.7167	3.2467	1.2037	887	2.831710032	0.00654125	30.14919312	0.069644636
15.39905868	×ÔÉí³µÁ¾	Road 1	172.3777162	69.84965286	-0.002568523	0.857962787	0.58431375	0	194.6141	980.8867	655.7146	3.2393	1.2112	888	2.2693716	0.005242248	30.18711476	0.069732235
15.41569667	×ÔÉí³µÁ¾	Road 1	172.7007084	69.88657379	-0.002529231	0.861159801	0.58431375	0	194.8856	980.8975	655.7124	3.2335	1.217	889	2.183436252	0.005043738	30.22344274	0.069816153
15.4327199	×ÔÉí³µÁ¾	Road 1	173.0313801	69.92903595	-0.002481941	0.863379598	0.58431375	0	195.196	980.9102	655.7098	3.2264	1.224	890	2.350841928	0.005430445	30.26346167	0.069908596
15.44902285	×ÔÉí³µÁ¾	Road 1	173.3483256	69.98756561	-0.002431932	0.866887689	0.58431375	0	195.6232	980.9277	655.7063	3.2166	1.2338	891	3.014859105	0.006964325	30.31261277	0.070022135
15.46571142	×ÔÉí³µÁ¾	Road 1	173.6729413	70.02495346	-0.002387502	0.870347261	0.58431375	0	195.8953	980.9385	655.7039	3.2108	1.2387	892	2.200019171	0.005082044	30.34932794	0.070106948
15.48232265	×ÔÉí³µÁ¾	Road 1	173.9962257	70.0625061	-0.002333937	0.872784674	0.58431375	0	196.1674	980.9502	655.7014	3.203	1.2454	893	2.213356012	0.005112852	30.3860945	0.070191878
15.49900058	×ÔÉí³µÁ¾	Road 1	174.3210703	70.11901016	-0.002278008	0.876485884	0.58431375	0	196.576	980.9668	655.6975	3.1939	1.2546	894	2.897529341	0.006693293	30.43441931	0.070303509
15.51570821	×ÔÉí³µÁ¾	Road 1	174.6466688	70.15684433	-0.002218305	0.878431499	0.58431375	0	196.8485	980.9775	655.6948	3.1881	1.2604	895	2.218236863	0.005124127	30.47148079	0.070389121
15.53237296	×ÔÉí³µÁ¾	Road 1	174.9716197	70.19750061	-0.002170379	0.880864382	0.58431375	0	197.1407	980.9902	655.6918	3.1807	1.2678	896	2.325558783	0.005372041	30.51023563	0.070478644
15.54898748	×ÔÉí³µÁ¾	Road 1	175.2958551	70.25465012	-0.002115596	0.883889198	0.58431375	0	197.55	981.0068	655.6876	3.1713	1.276	897	2.933970759	0.006777472	30.55898216	0.070591249
15.56592934	×ÔÉí³µÁ¾	Road 1	175.6266455	70.29012222	-0.002069167	0.887436628	0.58431375	0	197.8036	981.0176	655.6848	3.165	1.2821	898	2.118222286	0.004893093	30.59486878	0.070674147
15.5823111	×ÔÉí³µÁ¾	Road 1	175.9467622	70.34776611	-0.002014647	0.890847325	0.58431375	0	198.2135	981.0342	655.6802	3.1556	1.2913	899	2.985495708	0.006896495	30.64377646	0.070787124
15.59900003	×ÔÉí³µÁ¾	Road 1	176.2730599	70.38624573	-0.001969712	0.892660201	0.58431375	0	198.4869	981.0459	655.6771	3.1487	1.298	900	2.24956534	0.005196496	30.6813193	0.070873848
15.61569447	×ÔÉí³µÁ¾	Road 1	176.599644	70.42483521	-0.001926868	0.896105409	0.58431375	0	198.7605	981.0566	655.6738	3.1428	1.3038	901	2.25417533	0.005207145	30.71895148	0.070960778
15.63235811	×ÔÉí³µÁ¾	Road 1	176.9258953	70.48306961	-0.001887445	0.899779439	0.58431375	0	199.1711	981.0742	655.6688	3.1329	1.3139	902	2.97598834	0.006874533	30.76854229	0.071075333
15.64960421	×ÔÉí³µÁ¾	Road 1	177.2637369	70.52202301	-0.001851323	0.90111202	0.58431375	0	199.4451	981.0859	655.6654	3.1262	1.3197	903	2.224675247	0.005139	30.80690926	0.07116396
15.66564874	×ÔÉí³µÁ¾	Road 1	177.5783014	70.58058701	-0.001822486	0.905598223	0.58431375	0	199.8563	981.1025	655.6602	3.1172	1.3288	904	3.074430361	0.007101934	30.85623705	0.071277908
15.68231092	×ÔÉí³µÁ¾	Road 1	177.9051569	70.61980133	-0.001795302	0.907660604	0.58431375	0	200.1307	981.1143	655.6566	3.1106	1.3356	905	2.285190705	0.005278791	30.8943133	0.071365864
15.69903724	×ÔÉí³µÁ¾	Road 1	178.2334533	70.65910492	-0.001776435	0.91025573	0.58431375	0	200.4052	981.126	655.6528	3.1039	1.3423	906	2.284042768	0.005276139	30.93251694	0.071454114
15.71561071	×ÔÉí³µÁ¾	Road 1	178.5590221	70.71832123	-0.001753703	0.914757729	0.58431375	0	200.8172	981.1426	655.6471	3.0949	1.3514	907	3.032716001	0.007005574	30.98277957	0.071570221
15.73232714	×ÔÉí³µÁ¾	Road 1	178.8875835	70.75798874	-0.001736451	0.916749477	0.58431375	0	201.0921	981.1543	655.6432	3.0881	1.3581	908	2.30097525	0.005315253	31.02124365	0.071659073
15.74897135	×ÔÉí³µÁ¾	Road 1	179.2149881	70.81480179	-0.001716687	0.919108152	0.58431375	0	201.3671	981.166	655.6393	3.0814	1.3648	909	2.938864024	0.006788776	31.07015874	0.071772067
15.76567532	×ÔÉí³µÁ¾	Road 1	179.5436864	70.8403038	-0.0017049	0.921327114	0.58431375	0	201.6423	981.1777	655.6353	3.0747	1.3706	910	1.78546055	0.004124414	31.099983	0.071840961
15.78234739	×ÔÉí³µÁ¾	Road 1	179.8720226	70.89761124	-0.001690568	0.925010383	0.58431375	0	202.0554	981.1943	655.629	3.0655	1.3796	911	2.956611589	0.006829773	31.14927585	0.071954827
15.79900003	×ÔÉí³µÁ¾	Road 1	180.2001618	70.9377388	-0.001678901	0.927851737	0.58431375	0	202.331	981.2061	655.6248	3.0588	1.3863	912	2.328556228	0.005378965	31.18805247	0.072044401
15.81568567	×ÔÉí³µÁ¾	Road 1	180.5292578	71.00393829	-0.001667289	0.93235898	0.58431375	0	202.784	981.2256	655.6176	3.0475	1.3977	913	3.285604422	0.007589746	31.24287487	0.072171041
15.83227857	×ÔÉí³µÁ¾	Road 1	180.856725	71.04738235	-0.001657011	0.934089959	0.58431375	0	203.0798	981.2373	655.6128	3.0411	1.4041	914	2.459667047	0.005681831	31.28368787	0.072265319
15.84898693	×ÔÉí³µÁ¾	Road 1	181.1866593	71.0879631	-0.001639128	0.936675131	0.58431375	0	203.3559	981.249	655.6083	3.0344	1.4108	915	2.344571352	0.00541596	31.32286182	0.072355811
15.86566377	×ÔÉí³µÁ¾	Road 1	181.5161867	71.13450394	-0.001618848	0.939045846	0.58431375	0	203.6717	981.2627	655.603	3.0265	1.4188	916	2.568298103	0.005932769	31.36569291	0.072454751
15.89900718	×ÔÉí³µÁ¾	Road 1	182.1759299	71.23071671	-0.001591236	0.943051517	0.58431375	0	204.304	981.2891	655.592	3.0115	1.4328	917	2.629062566	0.006073135	31.45335484	0.07265725
15.9156602	×ÔÉí³µÁ¾	Road 1	182.5056904	71.28667831	-0.001555322	0.949202359	0.58431375	0	204.6996	981.3057	655.585	3.0021	1.4423	918	2.923870247	0.00675414	31.50204608	0.072769726
15.93236049	×ÔÉí³µÁ¾	Road 1	182.8365925	71.33092575	-0.001467318	0.951619864	0.58431375	0	204.9965	981.3184	655.5796	2.9948	1.4496	919	2.487547436	0.005746235	31.54358887	0.07286569
15.94898015	×ÔÉí³µÁ¾	Road 1	183.1661838	71.39308777	-0.001399812	0.954888403	0.58431375	0	205.4124	981.3359	655.5719	2.9838	1.4596	920	3.161937278	0.007304075	31.59613918	0.072987081
15.96560274	×ÔÉí³µÁ¾	Road 1	183.4960252	71.43465729	-0.001326657	0.957687676	0.58431375	0	205.69	981.3477	655.5667	2.9771	1.4663	921	2.398979651	0.005541643	31.63601643	0.073079198
15.98231257	×ÔÉí³µÁ¾	Road 1	183.8278882	71.49726563	-0.001259296	0.961564243	0.58431375	0	206.1066	981.3652	655.5587	2.967	1.4763	922	3.170138234	0.007323019	31.68898889	0.073201564
15.9989993	×ÔÉí³µÁ¾	Road 1	184.1594868	71.53915787	-0.001182954	0.963943422	0.58431375	0	206.3845	981.377	655.5532	2.9603	1.483	923	2.408058974	0.005562616	31.72917154	0.073294386
16.01566074	×ÔÉí³µÁ¾	Road 1	184.4907772	71.58113937	-0.001104862	0.96635288	0.58431375	0	206.6626	981.3887	655.5477	2.9537	1.4897	924	2.414965353	0.00557857	31.76940835	0.073387333
16.03234675	×ÔÉí³µÁ¾	Road 1	184.8228487	71.64434509	-0.001024691	0.970456123	0.58431375	0	207.08	981.4072	655.5393	2.9427	1.4997	925	3.201502538	0.007395471	31.82282862	0.073510734
16.04907051	×ÔÉí³µÁ¾	Road 1	185.1558681	71.68661499	-0.000944083	0.972227395	0.58431375	0	207.3585	981.4189	655.5336	2.936	1.5064	926	2.422944652	0.005597002	31.86334936	0.073604337
16.0656788	×ÔÉí³µÁ¾	Road 1	185.4867839	71.72903595	-0.000873662	0.975177705	0.576470613	0	207.6372	981.4307	655.5277	2.9293	1.5131	927	2.440725419	0.005638076	31.90388565	0.073697976
16.08227133	×ÔÉí³µÁ¾	Road 1	185.8176791	71.79270859	-0.000800501	0.975237489	0.576470613	0	208.0555	981.4482	655.5189	2.9193	1.5231	928	3.238190382	0.00748022	31.95761542	0.073822092
16.09893827	×ÔÉí³µÁ¾	Road 1	186.1502545	71.83510208	-0.000702935	0.974570632	0.568627477	0	208.3346	981.46	655.5129	2.9127	1.5297	929	2.437291154	0.005630143	31.99823761	0.073915929
16.11561254	×ÔÉí³µÁ¾	Road 1	186.4832703	71.89860992	-0.000591432	0.971487224	0.568627477	0	208.7535	981.4775	655.5037	2.9027	1.5397	930	3.224706929	0.007449073	32.05200725	0.074040137
16.13478086	×ÔÉí³µÁ¾	Road 1	186.8664017	71.95586243	-0.000495252	0.968789101	0.56078434	0	209.1329	981.4941	655.4952	2.8929	1.5495	931	2.716250097	0.006274538	32.1040732	0.074160409
16.15015056	×ÔÉí³µÁ¾	Road 1	187.1737865	71.99785767	-0.000410109	0.966120005	0.56078434	0	209.4126	981.5059	655.4889	2.8863	1.5561	932	2.559559398	0.005912582	32.14341286	0.074251284
16.16631092	×ÔÉí³µÁ¾	Road 1	187.4971721	72.03972244	-0.000328746	0.965031028	0.56078434	0	209.6925	981.5176	655.4824	2.8796	1.5628	933	2.472648707	0.005711819	32.18337176	0.074343589
16.18223742	×ÔÉí³µÁ¾	Road 1	187.8160629	72.08158035	-0.000262287	0.964374363	0.56078434	0	209.9726	981.5303	655.476	2.872	1.5704	934	2.497332132	0.005768837	32.22314551	0.074435466
16.19900113	×ÔÉí³µÁ¾	Road 1	188.1519259	72.12642517	-0.000205767	0.963028014	0.56078434	0	210.2728	981.543	655.4689	2.8648	1.5776	935	2.52790217	0.005839454	32.26552254	0.074533357
16.21560136	×ÔÉí³µÁ¾	Road 1	188.4848304	72.19515839	-0.000160164	0.966125607	0.56078434	0	210.7336	981.5625	655.4579	2.8536	1.5878	936	3.443581342	0.007954673	32.32268678	0.074665406
16.23226207	×ÔÉí³µÁ¾	Road 1	188.8191558	72.24011307	-0.000120729	0.967092931	0.56078434	0	211.0343	981.5752	655.4506	2.8464	1.5951	937	2.545850547	0.005880915	32.36510245	0.074763387
16.24895504	×ÔÉí³µÁ¾	Road 1	189.1543233	72.28210144	-8.75E-05	0.968871951	0.56078434	0	211.3151	981.5869	655.4436	2.8398	1.6017	938	2.432966086	0.005620152	32.40571588	0.074857204
16.26567183	×ÔÉí³µÁ¾	Road 1	189.4902621	72.34520416	-6.63E-05	0.972157836	0.56078434	0	211.7367	981.6055	655.4331	2.8289	1.6126	939	3.221687659	0.007442098	32.45957216	0.074981612
16.28225923	×ÔÉí³µÁ¾	Road 1	189.8238095	72.39054337	-5.22E-05	0.974493444	0.56078434	0	212.038	981.6182	655.4255	2.8217	1.6199	940	2.572479778	0.005942428	32.50224291	0.075080181
16.29897089	×ÔÉí³µÁ¾	Road 1	190.1600519	72.43279953	-4.07E-05	0.976096034	0.56078434	0	212.3195	981.6299	655.4183	2.8151	1.6265	941	2.44567792	0.005649516	32.54311425	0.075174594
16.31570015	×ÔÉí³µÁ¾	Road 1	190.4969586	72.49958954	-3.38E-05	0.980116904	0.56078434	0	212.7621	981.6484	655.4067	2.8046	1.637	942	3.364135175	0.007771152	32.59939373	0.0753046
16.33229305	×ÔÉí³µÁ¾	Road 1	190.8313155	72.54216843	-2.79E-05	0.982541382	0.56078434	0	213.0439	981.6611	655.3993	2.797	1.6446	943	2.47244691	0.005711352	32.64041879	0.075399367
16.34894716	×ÔÉí³µÁ¾	Road 1	191.1671034	72.58487091	-2.38E-05	0.984710872	0.56078434	0	213.326	981.6729	655.3918	2.7904	1.6512	944	2.472463738	0.005711391	32.68159548	0.075494486
16.36560787	×ÔÉí³µÁ¾	Road 1	191.5033362	72.6522377	-2.04E-05	0.988159716	0.56078434	0	213.7695	981.6914	655.3799	2.7799	1.6617	945	3.402613389	0.007860037	32.73828543	0.075625439
16.38226821	×ÔÉí³µÁ¾	Road 1	191.8397606	72.69524918	-1.75E-05	0.99072367	0.56078434	0	214.052	981.7041	655.3721	2.7723	1.6693	946	2.486810341	0.005744532	32.77971655	0.075721145
16.3990048	×ÔÉí³µÁ¾	Road 1	192.1779396	72.74151535	-1.62E-05	0.993480921	0.56078434	0	214.3548	981.7168	655.3638	2.7651	1.6765	947	2.602983714	0.006012892	32.82328161	0.075821781
16.41559367	×ÔÉí³µÁ¾	Road 1	192.5133472	72.78781586	-1.58E-05	0.996093869	0.56078434	0	214.6578	981.7295	655.3552	2.758	1.6837	948	2.621230526	0.006055043	32.86676485	0.075922227
16.43233832	×ÔÉí³µÁ¾	Road 1	192.8522074	72.85290985	-1.58E-05	0.998911917	0.56078434	0	215.0824	981.748	655.3431	2.7471	1.6945	949	3.313051765	0.00765315	32.92224075	0.076050376
16.44967276	×ÔÉí³µÁ¾	Road 1	193.2032426	72.90265045	-1.58E-05	1.002580166	0.56078434	0	215.4061	981.7617	655.3339	2.7393	1.7023	950	2.674233678	0.00617748	32.96859709	0.076157459
16.46588737	×ÔÉí³µÁ¾	Road 1	193.5317972	72.94634171	-1.58E-05	1.005551338	0.56078434	0	215.6896	981.7734	655.3256	2.7328	1.7089	951	2.565504073	0.005926314	33.01019574	0.076253552
16.48224567	×ÔÉí³µÁ¾	Road 1	193.8634629	72.99026642	-1.58E-05	1.007654071	0.56078434	0	215.9732	981.7852	655.3173	2.7262	1.7154	952	2.560940063	0.005915772	33.05208837	0.076350324
16.49900572	×ÔÉí³µÁ¾	Road 1	194.203595	73.05919189	-1.58E-05	1.011763334	0.56078434	0	216.4192	981.8047	655.3041	2.7148	1.7269	953	3.463537894	0.008000773	33.11013743	0.076484417
16.51559971	×ÔÉí³µÁ¾	Road 1	194.5405609	73.10337753	-1.58E-05	1.014095187	0.56078434	0	216.7033	981.8164	655.2955	2.7082	1.7334	954	2.550284922	0.005891158	33.15245685	0.076582175
16.53226665	×ÔÉí³µÁ¾	Road 1	194.8793156	73.16980362	-1.58E-05	1.018204331	0.56078434	0	217.1297	981.835	655.2825	2.6974	1.7442	955	3.388111914	0.007826539	33.20892631	0.07671262
16.548927	×ÔÉí³µÁ¾	Road 1	195.2181562	73.21736069	-1.58E-05	1.019280195	0.56078434	0	217.4346	981.8477	655.2731	2.6902	1.7514	956	2.675050045	0.006179366	33.25349357	0.07681557
16.56560824	×ÔÉí³µÁ¾	Road 1	195.5576433	73.26515121	-1.58E-05	1.023518801	0.56078434	0	217.7396	981.8613	655.2636	2.6821	1.7595	957	2.683193115	0.006198176	33.29825255	0.076918963
16.58233199	×ÔÉí³µÁ¾	Road 1	195.8983068	73.33212662	-1.61E-05	1.027202725	0.56078434	0	218.167	981.8789	655.2501	2.6723	1.7693	958	3.40718533	0.007870598	33.35523349	0.077050589
16.59892232	×ÔÉí³µÁ¾	Road 1	196.2364589	73.37693024	-1.63E-05	1.02975738	0.56078434	0	218.4521	981.8916	655.241	2.6648	1.7768	959	2.58268671	0.005966006	33.39808112	0.077149567
16.61598991	×ÔÉí³µÁ¾	Road 1	196.584552	73.42192612	-1.66E-05	1.033136964	0.568627477	0	218.7375	981.9033	655.2318	2.6583	1.7834	960	2.543329091	0.00587509	33.44148961	0.077249841
16.63230349	×ÔÉí³µÁ¾	Road 1	196.9175148	73.47657623	-1.70E-05	1.036949039	0.568627477	0	219.023	981.916	655.2225	2.6507	1.7909	961	2.997870783	0.006925082	33.49039562	0.077362814
16.64917974	×ÔÉí³µÁ¾	Road 1	197.2622367	73.53524323	-1.74E-05	1.046481609	0.568627477	0	219.4516	981.9336	655.2085	2.641	1.8007	962	3.080216389	0.0071153	33.54237811	0.077482893
16.66559009	×ÔÉí³µÁ¾	Road 1	197.597651	73.58106995	-1.77E-05	1.050290227	0.568627477	0	219.7375	981.9463	655.199	2.6334	1.8082	963	2.647486789	0.006115694	33.5858243	0.077583254
16.68222771	×ÔÉí³µÁ¾	Road 1	197.9380295	73.65013275	-1.87E-05	1.055547953	0.568627477	0	220.1668	981.9639	655.1846	2.6236	1.8179	964	3.513637183	0.008116502	33.64428285	0.077718293
16.69899655	×ÔÉí³µÁ¾	Road 1	198.2813235	73.69968796	-1.96E-05	1.059298396	0.568627477	0	220.4736	981.9775	655.1742	2.6155	1.826	965	2.754782933	0.006363549	33.69047737	0.077825003
16.71559055	×ÔÉí³µÁ¾	Road 1	198.6212519	73.74607773	-2.10E-05	1.061871648	0.568627477	0	220.7602	981.9893	655.1643	2.609	1.8326	966	2.654673412	0.006132296	33.73452902	0.077926762
16.7322245	×ÔÉí³µÁ¾	Road 1	198.9623208	73.81575851	-2.30E-05	1.067207575	0.568627477	0	221.1905	982.0078	655.1494	2.5982	1.8433	967	3.545127477	0.008189244	33.79349849	0.078062982
16.74901424	×ÔÉí³µÁ¾	Road 1	199.3068182	73.86600723	-2.50E-05	1.069276929	0.568627477	0	221.498	982.0215	655.1387	2.5901	1.8514	968	2.784326955	0.006431795	33.84024661	0.07817097
16.76647624	×ÔÉí³µÁ¾	Road 1	199.6654507	73.93635406	-2.74E-05	1.074163437	0.568627477	0	221.929	982.0391	655.1234	2.5803	1.8611	969	3.447913175	0.007964679	33.90045408	0.078310049
16.78222019	×ÔÉí³µÁ¾	Road 1	199.9890037	73.98338928	-3.03E-05	1.076313138	0.568627477	0	222.2165	982.0518	655.1132	2.5728	1.8686	970	2.784921401	0.006433168	33.94429975	0.078411332
16.79952494	×ÔÉí³µÁ¾	Road 1	200.3448764	74.03410492	-3.31E-05	1.079832315	0.576470613	0	222.5248	982.0645	655.1021	2.5656	1.8757	971	2.750265584	0.006353113	33.99189241	0.078521271
16.81559476	×ÔÉí³µÁ¾	Road 1	200.6755641	74.08145599	-3.64E-05	1.084243417	0.576470613	0	222.8127	982.0771	655.0916	2.5582	1.8831	972	2.762018898	0.006380264	34.03627756	0.078623801
16.83232585	×ÔÉí³µÁ¾	Road 1	201.0202081	74.15645828	-3.93E-05	1.093167067	0.576470613	0	223.2656	982.0967	655.075	2.5468	1.8945	973	3.748165411	0.008658262	34.09898845	0.078768663
16.84895724	×ÔÉí³µÁ¾	Road 1	201.3630362	74.20796356	-4.23E-05	1.097953677	0.576470613	0	223.5746	982.1094	655.0635	2.5397	1.9015	974	2.862518609	0.006612418	34.1465961	0.078878637
16.86558533	×ÔÉí³µÁ¾	Road 1	201.7060187	74.25611115	-4.49E-05	1.10217309	0.576470613	0	223.8632	982.1221	655.0527	2.5322	1.909	975	2.735080854	0.006318037	34.19207526	0.078983694
16.88223944	×ÔÉí³µÁ¾	Road 1	202.0498913	74.33245926	-4.82E-05	1.106368423	0.576470613	0	224.3171	982.1416	655.0355	2.5209	1.9203	976	3.821514061	0.008827697	34.25571918	0.079130711
16.89891994	×ÔÉí³µÁ¾	Road 1	202.3945339	74.38106689	-5.10E-05	1.11034739	0.576470613	0	224.6062	982.1533	655.0245	2.5144	1.9267	977	2.751049561	0.006354924	34.30160808	0.079236715
16.91556929	×ÔÉí³µÁ¾	Road 1	202.7387584	74.42983932	-5.36E-05	1.113082886	0.576470613	0	224.8955	982.166	655.0134	2.5069	1.9342	978	2.762526079	0.006381435	34.34760233	0.079342961
16.9322322	×ÔÉí³µÁ¾	Road 1	203.0835063	74.48233337	-5.56E-05	1.116042495	0.576470613	0	225.2057	982.1787	655.0013	2.4998	1.9412	979	2.90639439	0.006713771	34.39603132	0.079454832
16.94959743	×ÔÉí³µÁ¾	Road 1	203.4431234	74.55250168	-5.77E-05	1.120274544	0.576470613	0	225.6196	982.1973	654.9851	2.4888	1.9523	980	3.481996231	0.008043411	34.45649699	0.079594508
16.96556352	×ÔÉí³µÁ¾	Road 1	203.7739839	74.60173416	-5.93E-05	1.122643471	0.576470613	0	225.9096	982.209	654.9736	2.4823	1.9587	981	2.86757439	0.006624097	34.50228093	0.079700269
16.98227884	×ÔÉí³µÁ¾	Road 1	204.1207322	74.67961349	-6.08E-05	1.127190828	0.576470613	0	226.3657	982.2285	654.9555	2.471	1.97	982	3.886197424	0.008977116	34.56723999	0.079850324
16.99895092	×ÔÉí³µÁ¾	Road 1	204.466829	74.73266373	-6.17E-05	1.12999022	0.576470613	0	226.6769	982.2422	654.9429	2.463	1.978	983	2.935568802	0.006781164	34.61618201	0.07996338
17.01557277	×ÔÉí³µÁ¾	Road 1	204.8121294	74.78595428	-6.22E-05	1.132756591	0.576470613	0	226.9884	982.2549	654.9303	2.4559	1.985	984	2.952997469	0.006821424	34.6652663	0.080076765
17.03584443	×ÔÉí³µÁ¾	Road 1	205.2337319	74.87149658	-6.22E-05	1.137590766	0.576470613	0	227.4872	982.2764	654.9099	2.4434	1.9974	985	3.611142477	0.008341739	34.73847014	0.080245866
17.05020903	×ÔÉí³µÁ¾	Road 1	205.5326817	74.92161484	-6.22E-05	1.140121818	0.58431375	0	227.7784	982.2891	654.8978	2.436	2.0048	986	3.141000634	0.007255711	34.78358936	0.080350091
17.06556773	×ÔÉí³µÁ¾	Road 1	205.8525347	74.97187729	-6.22E-05	1.14470768	0.58431375	0	228.0698	982.3008	654.8856	2.4295	2.0113	987	3.002719595	0.006936282	34.82970724	0.080456624
17.08223541	×ÔÉí³µÁ¾	Road 1	206.1998818	75.02244186	-6.22E-05	1.150470018	0.58431375	0	228.3615	982.3135	654.8734	2.4221	2.0187	988	2.849714636	0.006582841	34.87720536	0.080566344
17.0989412	×ÔÉí³µÁ¾	Road 1	206.548259	75.07320557	-6.22E-05	1.155679822	0.58431375	0	228.6533	982.3262	654.861	2.4147	2.026	989	2.854678532	0.006594307	34.92489504	0.080676508
17.11557809	×ÔÉí³µÁ¾	Road 1	206.8954686	75.13152924	-6.22E-05	1.160300374	0.58431375	0	228.9871	982.3398	654.8468	2.4071	2.0336	990	3.159660704	0.007298816	34.97746194	0.080797937
17.13223806	×ÔÉí³µÁ¾	Road 1	207.2435499	75.21575317	-6.22E-05	1.166506648	0.58431375	0	229.4674	982.3604	654.8261	2.3952	2.0454	991	4.169288221	0.009631056	35.04692219	0.08095839
17.1489292	×ÔÉí³µÁ¾	Road 1	207.5925214	75.26734772	-6.22E-05	1.169222355	0.58431375	0	229.76	982.373	654.8134	2.3878	2.0528	992	2.89537856	0.006688324	35.09524934	0.081070026
17.16557231	×ÔÉí³µÁ¾	Road 1	207.940727	75.31883926	-6.22E-05	1.172210932	0.58431375	0	230.0528	982.3857	654.8006	2.3805	2.0602	993	2.898932313	0.006696534	35.14349661	0.081181477
17.18223009	×ÔÉí³µÁ¾	Road 1	208.2896159	75.40022049	-6.22E-05	1.178047538	0.58431375	0	230.5133	982.4053	654.7803	2.3693	2.0713	994	4.068139845	0.009397403	35.21126278	0.081338017
17.19890436	×ÔÉí³µÁ¾	Road 1	208.6390919	75.45239182	-6.22E-05	1.178909302	0.58431375	0	230.8067	982.418	654.7672	2.3619	2.0787	995	2.926338427	0.006759842	35.26005734	0.081450732
17.21554821	×ÔÉí³µÁ¾	Road 1	208.9881708	75.50441208	-6.22E-05	1.182473183	0.58431375	0	231.1002	982.4307	654.754	2.3546	2.0861	996	2.925962119	0.006758972	35.30875661	0.081563228
17.23222248	×ÔÉí³µÁ¾	Road 1	209.3382685	75.58661041	-6.22E-05	1.186857104	0.58431375	0	231.5619	982.4502	654.7332	2.3434	2.0972	997	4.106279407	0.009485505	35.37722583	0.081721392
17.24890995	×ÔÉí³µÁ¾	Road 1	209.6888865	75.63907013	-6.22E-05	1.188966274	0.58431375	0	231.856	982.4629	654.7198	2.3361	2.1046	998	2.942510146	0.006797198	35.42632888	0.08183482
17.26571839	×ÔÉí³µÁ¾	Road 1	210.0424143	75.71795197	-6.11E-05	1.193552136	0.58431375	0	232.2975	982.4814	654.6995	2.3256	2.1151	999	3.958189577	0.009143418	35.49285984	0.081988506
17.28221305	×ÔÉí³µÁ¾	Road 1	210.3895841	75.77066574	-6.00E-05	1.195891738	0.58431375	0	232.5921	982.4941	654.6858	2.3182	2.1224	1000	2.981241172	0.006886667	35.5420344	0.082102099
17.29893057	×ÔÉí³µÁ¾	Road 1	210.7416903	75.82355118	-5.93E-05	1.198816657	0.58431375	0	232.8869	982.5068	654.6721	2.3109	2.1298	1001	2.96192953	0.006842057	35.59155054	0.082216482
17.31554473	×ÔÉí³µÁ¾	Road 1	211.0919865	75.90311966	-5.76E-05	1.202572703	0.58431375	0	233.3295	982.5254	654.6512	2.3004	2.1403	1002	4.030198919	0.00930976	35.6585089	0.082371156
17.33230881	×ÔÉí³µÁ¾	Road 1	211.4457092	75.96013184	-5.56E-05	1.205324769	0.58431375	0	233.6459	982.5391	654.6362	2.2924	2.1482	1003	3.122438486	0.007212833	35.7108537	0.082492072
17.34931701	×ÔÉí³µÁ¾	Road 1	211.8048349	76.01345673	-5.37E-05	1.207417965	0.58431375	0	233.9415	982.5518	654.6222	2.2851	2.1555	1004	2.950055894	0.006814629	35.76102886	0.082607977
17.36592861	×ÔÉí³µÁ¾	Road 1	212.1559555	76.09350586	-5.18E-05	1.212018847	0.58431375	0	234.3852	982.5703	654.6008	2.2746	2.166	1005	4.059053106	0.009376413	35.82845619	0.082763734
17.38228068	×ÔÉí³µÁ¾	Road 1	212.5018519	76.15104675	-4.93E-05	1.214120269	0.58431375	0	234.7025	982.584	654.5854	2.2667	2.1739	1006	3.207166842	0.007408555	35.88090001	0.082884879
17.39896485	×ÔÉí³µÁ¾	Road 1	212.8550224	76.2047905	-4.70E-05	1.216642976	0.58431375	0	234.9988	982.5967	654.5709	2.2594	2.1812	1007	3.013336565	0.006960807	35.93117503	0.083001014
17.41555591	×ÔÉí³µÁ¾	Road 1	213.2065943	76.28556061	-4.42E-05	1.221002936	0.58431375	0	235.4437	982.6152	654.5491	2.2489	2.1917	1008	4.101091782	0.009473522	35.9992165	0.08315819
17.43224008	×ÔÉí³µÁ¾	Road 1	213.5603884	76.33937302	-4.11E-05	1.224196553	0.58431375	0	235.7405	982.6279	654.5344	2.2416	2.199	1009	3.020843022	0.006978147	36.04961676	0.083274615
17.44894991	×ÔÉí³µÁ¾	Road 1	213.9150494	76.40889587	-3.79E-05	1.226085544	0.58431375	0	236.0376	982.6406	654.5195	2.2343	2.2063	1010	3.640382515	0.008409284	36.11044693	0.083415132
17.46781509	×ÔÉí³µÁ¾	Road 1	214.3158043	76.47515717	-3.51E-05	1.230230927	0.58431375	0	236.4836	982.6602	654.4971	2.2229	2.2177	1011	3.21510701	0.007426897	36.1711005	0.083555242
17.48276398	×ÔÉí³µÁ¾	Road 1	214.6335914	76.52965622	-3.11E-05	1.232739091	0.58431375	0	236.7812	982.6729	654.4821	2.2156	2.225	1012	3.305513738	0.007635737	36.22051427	0.083669388
17.49888365	×ÔÉí³µÁ¾	Road 1	214.9766339	76.6115387	-2.79E-05	1.236842394	0.58431375	0	237.228	982.6914	654.4595	2.2052	2.2355	1013	4.257187011	0.009834102	36.28913873	0.08382791
17.51557699	×ÔÉí³µÁ¾	Road 1	215.3321579	76.67050781	-2.47E-05	1.238106608	0.58431375	0	237.5475	982.7051	654.4432	2.1973	2.2433	1014	3.236002933	0.007475167	36.34315841	0.083952696
17.53221717	×ÔÉí³µÁ¾	Road 1	215.6868051	76.72572098	-2.20E-05	1.23970747	0.58431375	0	237.8458	982.7178	654.4281	2.1901	2.2506	1015	3.096044373	0.007151863	36.39467715	0.084071704
17.54895339	×ÔÉí³µÁ¾	Road 1	216.043848	76.80074387	-1.89E-05	1.241287351	0.58431375	0	238.1444	982.7305	654.413	2.1828	2.2579	1016	3.871076831	0.008942187	36.45946435	0.084221363
17.56558624	×ÔÉí³µÁ¾	Road 1	216.3989799	76.86444397	-1.61E-05	1.242587805	0.58431375	0	238.5928	982.75	654.3903	2.1714	2.2693	1017	3.44075011	0.007948133	36.51669384	0.084353563
17.58222166	×ÔÉí³µÁ¾	Road 1	216.7544431	76.92428513	-1.32E-05	1.243031144	0.58431375	0	238.9133	982.7637	654.374	2.1636	2.2771	1018	3.288717699	0.007596938	36.57140303	0.084479941
17.59893882	×ÔÉí³µÁ¾	Road 1	217.1119129	76.98024673	-1.09E-05	1.243649602	0.58431375	0	239.2126	982.7764	654.3588	2.1563	2.2844	1019	3.124924764	0.007218576	36.6236429	0.084600615
17.61553685	×ÔÉí³µÁ¾	Road 1	217.4672603	77.07244263	-8.57E-06	1.243109941	0.58431375	0	239.705	982.7969	654.3339	2.1447	2.2959	1020	4.596945346	0.010618944	36.69994313	0.084776869
17.63221149	×ÔÉí³µÁ¾	Road 1	217.8245083	77.12868576	-6.15E-06	1.242683053	0.58431375	0	240.0049	982.8096	654.3187	2.1375	2.3032	1021	3.147306661	0.007270278	36.75242333	0.084898098
17.64894368	×ÔÉí³µÁ¾	Road 1	218.1832877	77.19287338	-4.22E-06	1.243499517	0.58431375	0	240.3051	982.8223	654.3035	2.1302	2.3104	1022	3.458433921	0.007988982	36.8102905	0.085031771
17.66554207	×ÔÉí³µÁ¾	Road 1	218.5395498	77.26912537	-2.62E-06	1.242654681	0.58431375	0	240.7558	982.8418	654.2806	2.1188	2.3217	1023	3.967106061	0.009164015	36.8761381	0.085183879
17.68220571	×ÔÉí³µÁ¾	Road 1	218.8974719	77.32521744	-1.28E-06	1.24210453	0.58431375	0	241.0565	982.8545	654.2654	2.1116	2.329	1024	3.149997409	0.007276494	36.92862853	0.085305132
17.69893717	×ÔÉí³µÁ¾	Road 1	219.2572417	77.40935898	-5.08E-07	1.241788745	0.58431375	0	241.508	982.874	654.2424	2.1002	2.3403	1025	4.26445542	0.009850892	36.99997907	0.085469952
17.71561328	×ÔÉí³µÁ¾	Road 1	219.6160807	77.46534805	-1.20E-07	1.24137032	0.58431375	0	241.8092	982.8867	654.2272	2.093	2.3475	1026	3.149348433	0.007274995	37.05249794	0.08559127
17.73219261	×ÔÉí³µÁ¾	Road 1	219.9730959	77.52149506	-2.18E-09	1.241360307	0.58431375	0	242.1107	982.8994	654.2119	2.0858	2.3547	1027	3.170915144	0.007324814	37.1050696	0.085712711
17.74894826	×ÔÉí³µÁ¾	Road 1	220.3342988	77.60548553	7.28E-09	1.241660118	0.58431375	0	242.5634	982.9189	654.189	2.0744	2.366	1028	4.263597528	0.00984891	37.17650894	0.085877736
17.76556572	×ÔÉí³µÁ¾	Road 1	220.6927808	77.66143341	1.24E-07	1.241691589	0.58431375	0	242.8654	982.9316	654.1737	2.0672	2.3733	1029	3.162850193	0.007306184	37.22906747	0.085999146
17.7822103	×ÔÉí³µÁ¾	Road 1	221.0521264	77.72162476	6.01E-07	1.240994811	0.58431375	0	243.1892	982.9453	654.1573	2.0594	2.381	1030	3.332496903	0.007698068	37.28453549	0.086127277
17.79891169	×ÔÉí³µÁ¾	Road 1	221.4129584	77.77763443	1.55E-06	1.24037385	0.58431375	0	243.4917	982.958	654.1419	2.0522	2.3883	1031	3.158250422	0.007295558	37.33728268	0.086249123
17.81553135	×ÔÉí³µÁ¾	Road 1	221.7724671	77.87354507	3.09E-06	1.240631819	0.58431375	0	244.0108	982.9805	654.1156	2.0391	2.4013	1032	4.787010052	0.011057993	37.41684114	0.086432903
17.83319423	×ÔÉí³µÁ¾	Road 1	222.1548169	77.92950668	5.62E-06	1.240433693	0.58431375	0	244.3138	982.9932	654.1002	2.0319	2.4085	1033	3.039103333	0.007020329	37.47052044	0.086556902
17.84892425	×ÔÉí³µÁ¾	Road 1	222.4955707	77.98548889	8.45E-06	1.240200281	0.58431375	0	244.6171	983.0059	654.0848	2.0247	2.4157	1034	3.304235624	0.007632784	37.52249615	0.086676966
17.86552228	×ÔÉí³µÁ¾	Road 1	222.8555147	78.0694313	1.21E-05	1.239890575	0.58431375	0	245.0725	983.0254	654.0618	2.0134	2.427	1035	4.317450445	0.009973311	37.59415732	0.086842503
17.88225777	×ÔÉí³µÁ¾	Road 1	223.218737	78.13337173	1.54E-05	1.239232302	0.58431375	0	245.4197	983.04	654.0442	2.0051	2.4354	1036	3.486452744	0.008053706	37.6525048	0.086977286
17.89890601	×ÔÉí³µÁ¾	Road 1	223.5803248	78.18938141	1.86E-05	1.23920536	0.58431375	0	245.7238	983.0537	654.0288	1.9969	2.4436	1037	3.180617959	0.007347227	37.70545652	0.087099605
17.91552127	×ÔÉí³µÁ¾	Road 1	223.9415828	78.27316589	2.14E-05	1.239090681	0.58431375	0	246.1803	983.0732	654.0056	1.9856	2.4548	1038	4.317971497	0.009974514	37.77720072	0.087265334
17.93220471	×ÔÉí³µÁ¾	Road 1	224.3046008	78.33306198	2.36E-05	1.238875628	0.58431375	0	246.5067	983.0869	653.9891	1.9779	2.4626	1039	3.33869053	0.007712375	37.83290156	0.087394003
17.94895559	×ÔÉí³µÁ¾	Road 1	224.6693468	78.38904419	2.43E-05	1.239233732	0.58431375	0	246.8116	983.0996	653.9736	1.9707	2.4698	1040	3.172906492	0.007329414	37.88605054	0.087516777
17.96553749	×ÔÉí³µÁ¾	Road 1	225.030689	78.44890594	2.43E-05	1.238192439	0.58431375	0	247.1385	983.1133	653.9571	1.963	2.4775	1041	3.356681278	0.007753934	37.9417107	0.087645352
17.98221689	×ÔÉí³µÁ¾	Road 1	225.3945627	78.53669357	2.43E-05	1.238261223	0.58431375	0	247.6183	983.1338	653.9327	1.9511	2.4894	1042	4.48106619	0.010351263	38.01645221	0.087818005
17.9989993	×ÔÉí³µÁ¾	Road 1	225.7609438	78.59254532	2.33E-05	1.238041282	0.58431375	0	247.924	983.1475	653.9172	1.9431	2.4975	1043	3.170828392	0.007324614	38.06966634	0.087940929
18.01553355	×ÔÉí³µÁ¾	Road 1	226.122182	78.65233841	2.14E-05	1.23741138	0.58431375	0	248.2517	983.1611	653.9006	1.9355	2.5052	1044	3.368858891	0.007782064	38.12536789	0.0880696
18.03226207	×ÔÉí³µÁ¾	Road 1	226.4880531	78.73595123	1.89E-05	1.236904621	0.58431375	0	248.711	983.1807	653.8773	1.9245	2.5165	1045	4.311543882	0.009959666	38.19749365	0.08823621
18.04889896	×ÔÉí³µÁ¾	Road 1	226.8521784	78.79185104	1.67E-05	1.2368747	0.58431375	0	249.0174	983.1934	653.8618	1.9173	2.5236	1046	3.199890938	0.007391748	38.25072987	0.088359186
18.06561868	×ÔÉí³µÁ¾	Road 1	227.218505	78.87545013	1.43E-05	1.237343073	0.58431375	0	249.4774	983.2129	653.8386	1.906	2.5348	1047	4.319886867	0.009978939	38.32295719	0.088526031
18.08218262	×ÔÉí³µÁ¾	Road 1	227.5816754	78.93130875	1.20E-05	1.235258341	0.58431375	0	249.7844	983.2266	653.823	1.8979	2.5429	1048	3.213419295	0.007422999	38.37618407	0.088648985
18.09894523	×ÔÉí³µÁ¾	Road 1	227.9494606	78.98690643	1.02E-05	1.235693216	0.58431375	0	250.0916	983.2393	653.8074	1.8907	2.5501	1049	3.177580797	0.007340212	38.42944863	0.088772026
18.11553996	×ÔÉí³µÁ¾	Road 1	228.3139481	79.07057419	8.76E-06	1.235143542	0.58431375	0	250.5528	983.2588	653.784	1.8795	2.5612	1050	4.358381706	0.010067862	38.5017748	0.0889391
18.13225749	×ÔÉí³µÁ¾	Road 1	228.6814092	79.13013382	7.29E-06	1.235145092	0.58431375	0	250.8825	983.2734	653.7673	1.8708	2.5699	1051	3.350862942	0.007740493	38.55779294	0.089068502
18.14890684	×ÔÉí³µÁ¾	Road 1	229.0476292	79.18580704	6.19E-06	1.235323668	0.58431375	0	251.1904	983.2861	653.7517	1.8637	2.577	1052	3.20336691	0.007399778	38.6111269	0.089191703
18.16559797	×ÔÉí³µÁ¾	Road 1	229.415155	79.26920013	5.31E-06	1.234822273	0.58431375	0	251.6528	983.3057	653.7283	1.8526	2.5883	1053	4.337382021	0.010019352	38.68352273	0.089358938
18.1822136	×ÔÉí³µÁ¾	Road 1	229.7812934	79.3288353	4.54E-06	1.234986901	0.58431375	0	251.9833	983.3203	653.7115	1.844	2.5971	1054	3.376613956	0.007799978	38.73962728	0.089488539
18.19902569	×ÔÉí³µÁ¾	Road 1	230.152021	79.38446045	4.05E-06	1.23437202	0.58431375	0	252.2921	983.333	653.6959	1.8369	2.6043	1055	3.18649293	0.007360799	38.79319891	0.089612289
18.2155746	×ÔÉí³µÁ¾	Road 1	230.5173285	79.46790161	3.58E-06	1.234442353	0.58431375	0	252.7556	983.3525	653.6724	1.8258	2.6154	1056	4.378972429	0.010115426	38.86566613	0.089779689
18.23225438	×ÔÉí³µÁ¾	Road 1	230.8858007	79.52745438	3.29E-06	1.233412385	0.58431375	0	253.0869	983.3672	653.6556	1.8171	2.624	1057	3.371443852	0.007788035	38.92190104	0.089909591
18.24889456	×ÔÉí³µÁ¾	Road 1	231.2536552	79.58303146	3.09E-06	1.233992457	0.58431375	0	253.3965	983.3799	653.6399	1.8101	2.6309	1058	3.21523095	0.007427183	38.97540307	0.090033181
18.26563994	×ÔÉí³µÁ¾	Road 1	231.624223	79.6663765	2.96E-06	1.23286736	0.58431375	0	253.8611	983.4004	653.6163	1.798	2.6428	1059	4.344508021	0.010035814	39.04815353	0.090201235
18.28228489	×ÔÉí³µÁ¾	Road 1	231.9928432	79.7258606	2.85E-06	1.232612848	0.58431375	0	254.1933	983.4141	653.5995	1.7904	2.6503	1060	3.381413201	0.007811064	39.10443698	0.090331249
18.29894707	×ÔÉí³µÁ¾	Road 1	232.3621019	79.78136902	2.79E-06	1.232412934	0.58431375	0	254.5036	983.4277	653.5837	1.7823	2.6583	1061	3.216620491	0.007430393	39.15803288	0.090455056
18.31558175	×ÔÉí³µÁ¾	Road 1	232.7310077	79.83686371	2.78E-06	1.232174516	0.58431375	0	254.8141	983.4404	653.5681	1.7753	2.6654	1062	3.22187795	0.007442538	39.2116278	0.09057886
18.3322245	×ÔÉí³µÁ¾	Road 1	233.1005142	79.9280983	2.74E-06	1.231193423	0.58431375	0	255.3246	983.4619	653.5421	1.7631	2.6777	1063	4.706080328	0.010871046	39.28994991	0.090759784
18.34893543	×ÔÉí³µÁ¾	Road 1	233.4718317	79.99215546	2.74E-06	1.807339311	0.58431375	0	255.6357	983.4756	653.5264	1.7551	2.6857	1064	3.570988215	0.008248983	39.34962444	0.090897632
18.36557708	×ÔÉí³µÁ¾	Road 1	233.8422225	80.12467804	2.74E-06	3.192011595	0.58431375	0	255.9694	983.4902	653.5095	1.7465	2.6943	1065	6.432709191	0.014859558	39.45667533	0.09114492
18.38221799	×ÔÉí³µÁ¾	Road 1	234.213757	80.37563324	2.74E-06	3.284842968	0.58431375	0	256.4377	983.5098	653.4857	1.7354	2.7054	1066	11.38384784	0.026296689	39.64611299	0.091582521
18.3989905	×ÔÉí³µÁ¾	Road 1	234.5889259	80.5251091	2.74E-06	2.178307056	0.58431375	0	256.7955	983.5254	653.4677	1.7263	2.7146	1067	7.122344547	0.016452616	39.76557258	0.091858473
18.4155999	×ÔÉí³µÁ¾	Road 1	234.9608206	80.60623627	2.74E-06	1.48530674	0.58431375	0	257.1089	983.5381	653.4517	1.7193	2.7216	1068	4.32769459	0.009996975	39.83745296	0.092024516
18.43222065	×ÔÉí³µÁ¾	Road 1	235.3333108	80.68014679	2.74E-06	1.627595067	0.58431375	0	257.4451	983.5527	653.4347	1.7108	2.7302	1069	4.026616886	0.009301485	39.90437837	0.092179114
18.44894184	×ÔÉí³µÁ¾	Road 1	235.7087138	80.82261887	2.74E-06	2.097132683	0.58431375	0	257.9388	983.5732	653.4097	1.6992	2.7418	1070	6.874628684	0.015880392	40.01933036	0.092444653
18.46607505	×ÔÉí³µÁ¾	Road 1	236.0938204	80.91797333	2.74E-06	1.904975057	0.58431375	0	258.2534	983.5869	653.3937	1.6913	2.7497	1071	4.818958625	0.011131794	40.10189455	0.092635376
18.48238643	×ÔÉí³µÁ¾	Road 1	236.4608365	81.00220413	2.74E-06	1.506880522	0.58431375	0	258.5909	983.6016	653.3766	1.6828	2.7583	1072	4.54298571	0.010494297	40.17599692	0.092806553
18.49886752	×ÔÉí³µÁ¾	Road 1	236.832097	81.09518967	2.74E-06	1.328709483	0.58431375	0	259.0638	983.6221	653.3527	1.6709	2.7702	1073	4.882479962	0.011278529	40.25646555	0.092992435
18.51559055	×ÔÉí³µÁ¾	Road 1	237.2091002	81.15826492	2.74E-06	1.43975389	0.58431375	0	259.3795	983.6348	653.3366	1.6639	2.7772	1074	3.575594556	0.008259623	40.31626031	0.093130561
18.53230771	×ÔÉí³µÁ¾	Road 1	237.5863072	81.23061676	2.74E-06	1.467618823	0.58431375	0	259.7179	983.6494	653.3195	1.6554	2.7858	1075	3.968664979	0.009167616	40.38260511	0.093283818
18.54888888	×ÔÉí³µÁ¾	Road 1	237.9607417	81.29489365	2.74E-06	1.339916706	0.58431375	0	260.0341	983.6631	653.3035	1.6475	2.7937	1076	3.654645672	0.008442232	40.44320341	0.0934238
18.56564892	×ÔÉí³µÁ¾	Road 1	238.339633	81.38452835	2.74E-06	1.132280469	0.58431375	0	260.554	983.6855	653.2771	1.6345	2.8068	1077	4.69237409	0.010839384	40.52184781	0.093605468
18.58228947	×ÔÉí³µÁ¾	Road 1	238.7160525	81.43423462	2.74E-06	1.120633245	0.58431375	0	260.8707	983.6982	653.261	1.6274	2.8138	1078	3.034885013	0.007010584	40.57234997	0.093722128
18.59888054	×ÔÉí³µÁ¾	Road 1	239.0916014	81.48819122	2.79E-06	1.135000587	0.58431375	0	261.2102	983.7129	653.2438	1.6189	2.8223	1079	3.223263317	0.007445738	40.62582734	0.093845661
18.61562006	×ÔÉí³µÁ¾	Road 1	239.4708728	81.56609802	2.90E-06	1.088618517	0.58431375	0	261.7086	983.7344	653.2185	1.6065	2.8348	1080	4.213449841	0.009733069	40.69635847	0.094008588
18.63225034	×ÔÉí³µÁ¾	Road 1	239.8479013	81.61629181	3.21E-06	1.041285038	0.58431375	0	262.0487	983.749	653.2013	1.598	2.8433	1081	3.06296456	0.007075448	40.74729644	0.094126255
18.64889566	×ÔÉí³µÁ¾	Road 1	240.2254793	81.66146622	3.42E-06	1.022022247	0.58431375	0	262.3664	983.7627	653.1852	1.5901	2.8512	1082	2.849887828	0.006583241	40.79473372	0.094235835
18.66555124	×ÔÉí³µÁ¾	Road 1	240.6036004	81.72854462	3.78E-06	1.018835902	0.58431375	0	262.8431	983.7822	653.161	1.5792	2.8621	1083	3.779024184	0.008729546	40.85767556	0.094381231
18.69898262	×ÔÉí³µÁ¾	Road 1	241.3631891	81.7949707	4.22E-06	1.001142621	0.58431375	0	263.3202	983.8027	653.1368	1.5674	2.874	1084	2.340119751	0.005405677	40.935909	0.09456195
18.71553887	×ÔÉí³µÁ¾	Road 1	241.7397559	81.88092499	4.61E-06	0.975749731	0.58431375	0	263.957	983.8301	653.1046	1.5516	2.8898	1085	4.608605211	0.010645878	41.01221019	0.094738206
18.73219408	×ÔÉí³µÁ¾	Road 1	242.1187698	81.92331848	7.40E-06	0.973053098	0.58431375	0	264.2756	983.8438	653.0884	1.5437	2.8977	1086	2.738776593	0.006326574	41.05782509	0.094843576
18.74889767	×ÔÉí³µÁ¾	Road 1	242.4991925	81.98961411	1.08E-05	0.966535866	0.58431375	0	264.7767	983.8652	653.063	1.5314	2.9096	1087	3.748763362	0.008659643	41.12044292	0.094988223
18.76561007	×ÔÉí³µÁ¾	Road 1	242.8800096	82.03143768	1.50E-05	0.959685564	0.58431375	0	265.0957	983.8789	653.0468	1.5235	2.9172	1088	2.711660848	0.006263937	41.16576127	0.095092909
18.7821872	×ÔÉí³µÁ¾	Road 1	243.2579358	82.07293854	2.27E-05	0.954087555	0.58431375	0	265.4149	983.8916	653.0306	1.5166	2.9241	1089	2.7135592	0.006268322	41.21074431	0.095196819
18.79886588	×ÔÉí³µÁ¾	Road 1	243.6383681	82.1142334	3.28E-05	0.951378822	0.58431375	0	265.7343	983.9053	653.0145	1.5087	2.932	1090	2.69520124	0.006225915	41.25569668	0.095300659
18.81552109	×ÔÉí³µÁ¾	Road 1	244.0185641	82.17881241	4.52E-05	0.948422372	0.58431375	0	266.2365	983.9268	652.989	1.4964	2.9444	1091	3.691770597	0.00852799	41.3171839	0.095442695
18.83221589	×ÔÉí³µÁ¾	Road 1	244.3998545	82.21993561	6.44E-05	0.945520997	0.58431375	0	266.5563	983.9404	652.9728	1.4885	2.9523	1092	2.689283547	0.006212245	41.36208095	0.095546407
18.84889676	×ÔÉí³µÁ¾	Road 1	244.781016	82.26079102	8.84E-05	0.942011178	0.58431375	0	266.8763	983.9541	652.9565	1.4806	2.9602	1093	2.68052597	0.006192015	41.40679446	0.095649695
18.86558863	×ÔÉí³µÁ¾	Road 1	245.1627259	82.32484818	0.000116967	0.939827025	0.58431375	0	267.3794	983.9756	652.9312	1.4683	2.9726	1094	3.669519152	0.008476589	41.46804559	0.095791185
18.88228562	×ÔÉí³µÁ¾	Road 1	245.544741	82.36536026	0.000155882	0.938624501	0.58431375	0	267.6997	983.9893	652.9149	1.4604	2.9805	1095	2.667240289	0.006161325	41.5125805	0.095894061
18.89890931	×ÔÉí³µÁ¾	Road 1	245.9252665	82.40602341	0.000196342	0.936971724	0.58431375	0	268.0202	984.0029	652.8986	1.4526	2.9884	1096	2.682495661	0.006196565	41.55717347	0.095997071
18.91552567	×ÔÉí³µÁ¾	Road 1	246.3059176	82.46957245	0.000242546	0.935048699	0.58431375	0	268.5242	984.0244	652.8731	1.4403	3.0007	1097	3.666091788	0.008468672	41.61809056	0.096137789
18.93223586	×ÔÉí³µÁ¾	Road 1	246.6889057	82.50994034	0.00030203	0.93404001	0.58431375	0	268.8452	984.0381	652.8568	1.4324	3.0086	1098	2.663880443	0.006153564	41.66260452	0.096240616
18.94900251	×ÔÉí³µÁ¾	Road 1	247.0734425	82.56466599	0.000367694	0.933039784	0.58431375	0	269.1662	984.0518	652.8405	1.4246	3.0165	1099	3.270303954	0.007554402	41.71743655	0.096367278
18.96553273	×ÔÉí³µÁ¾	Road 1	247.4527681	82.61067123	0.000439066	0.931979179	0.58431375	0	269.6481	984.0723	652.8161	1.4128	3.0283	1100	2.928883419	0.006765721	41.76585162	0.096479117
18.98222386	×ÔÉí³µÁ¾	Road 1	247.8359729	82.65089493	0.000528044	0.931371987	0.58431375	0	269.9696	984.0859	652.7998	1.405	3.0361	1101	2.663721885	0.006153198	41.81031216	0.096581821
18.99892672	×ÔÉí³µÁ¾	Road 1	248.2197266	82.71116867	0.000609021	0.929873526	0.58431375	0	270.4521	984.1064	652.7754	1.3933	3.0479	1102	3.521743695	0.008135228	41.86913537	0.096717703
19.01558084	×ÔÉí³µÁ¾	Road 1	248.6025591	82.75415955	0.000686418	0.93011862	0.58431375	0	270.797	984.1211	652.7579	1.3849	3.0563	1103	2.789274282	0.006443224	41.91558825	0.096825009
19.03222322	×ÔÉí³µÁ¾	Road 1	248.9853075	82.79428024	0.000775507	0.929105341	0.58431375	0	271.119	984.1348	652.7416	1.3771	3.0642	1104	2.668447149	0.006164113	41.95999757	0.096927594
19.04892132	×ÔÉí³µÁ¾	Road 1	249.369616	82.85438919	0.000854558	0.928446889	0.58431375	0	271.6023	984.1553	652.717	1.3653	3.076	1105	3.520999725	0.008133509	42.01879157	0.097063409
19.06555747	×ÔÉí³µÁ¾	Road 1	249.7526839	82.89444122	0.000925701	0.928266585	0.58431375	0	271.9247	984.1689	652.7007	1.3575	3.0838	1106	2.669004286	0.0061654	42.06319353	0.097165977
19.08231788	×ÔÉí³µÁ¾	Road 1	250.1388926	82.95446777	0.000996114	0.927624762	0.58431375	0	272.4087	984.1895	652.6761	1.3458	3.0956	1107	3.511778447	0.008112208	42.12205239	0.097301941
19.09892324	×ÔÉí³µÁ¾	Road 1	250.5217129	82.99446487	0.001036836	0.927027225	0.58431375	0	272.7315	984.2031	652.6598	1.338	3.1034	1108	2.67269291	0.006173921	42.16643342	0.097404461
19.11557039	×ÔÉí³µÁ¾	Road 1	250.9056945	83.03729095	0.001051915	0.926844835	0.58431375	0	273.0775	984.2178	652.6423	1.3296	3.1118	1109	2.791467282	0.006448289	42.21290339	0.097511807
19.13224649	×ÔÉí³µÁ¾	Road 1	251.2905292	83.07723999	0.001057607	0.926248193	0.58431375	0	273.4006	984.2314	652.6259	1.3218	3.1206	1110	2.665656849	0.006157667	42.25735616	0.097614493
19.14887898	×ÔÉí³µÁ¾	Road 1	251.674555	83.12004547	0.001057607	0.926088452	0.58431375	0	273.747	984.2461	652.6083	1.3135	3.129	1111	2.794690172	0.006455734	42.3038388	0.097721868
19.16550633	×ÔÉí³µÁ¾	Road 1	252.0587652	83.18560638	0.001059509	0.925387859	0.58431375	0	274.2785	984.2686	652.5814	1.3007	3.1419	1112	3.780425308	0.008732782	42.36669727	0.097867071
19.18221873	×ÔÉí³µÁ¾	Road 1	252.4451251	83.22539749	0.00106046	0.925459445	0.58431375	0	274.6022	984.2822	652.5649	1.2929	3.1497	1113	2.659342743	0.006143082	42.41114126	0.097969736
19.19891829	×ÔÉí³µÁ¾	Road 1	252.8313871	83.26822357	0.00106046	0.92503947	0.58431375	0	274.9492	984.2969	652.5474	1.2846	3.1581	1114	2.792588298	0.006450879	42.45777627	0.098077463
19.21553868	×ÔÉí³µÁ¾	Road 1	253.2160938	83.32802353	0.00106046	0.924799323	0.58431375	0	275.4353	984.3174	652.5228	1.2729	3.1697	1115	3.53815555	0.008173139	42.51658179	0.098213304
19.23219316	×ÔÉí³µÁ¾	Road 1	253.6017738	83.3678627	0.00106046	0.924193442	0.58431375	0	275.7596	984.3311	652.5063	1.2651	3.1775	1116	2.671424229	0.00617099	42.56107297	0.098316079
19.24886927	×ÔÉí³µÁ¾	Road 1	253.9881528	83.41061325	0.001062366	0.923786342	0.58431375	0	276.1071	984.3457	652.4886	1.2568	3.1858	1117	2.796188149	0.006459195	42.60770249	0.098423793
19.26550395	×ÔÉí³µÁ¾	Road 1	254.3738475	83.47023468	0.00107001	0.924196959	0.58431375	0	276.5941	984.3672	652.464	1.2441	3.1985	1118	3.533717691	0.008162888	42.66648477	0.09855958
19.28219179	×ÔÉí³µÁ¾	Road 1	254.760959	83.51001892	0.001076728	0.923602164	0.58431375	0	276.9189	984.3809	652.4475	1.2364	3.2062	1119	2.669644215	0.006166878	42.71103536	0.098662492
19.29889758	×ÔÉí³µÁ¾	Road 1	255.1486722	83.54988556	0.001081544	0.923221886	0.58431375	0	277.2439	984.3945	652.431	1.2286	3.214	1120	2.672484953	0.00617344	42.75568135	0.098765624
19.31552274	×ÔÉí³µÁ¾	Road 1	255.5348013	83.61215057	0.001084441	0.923405588	0.58431375	0	277.7549	984.416	652.4052	1.2164	3.2262	1121	3.655514934	0.008444239	42.81645485	0.098906011
19.33220837	×ÔÉí³µÁ¾	Road 1	255.9225195	83.65190735	0.001086375	0.922825754	0.58431375	0	278.0802	984.4297	652.3887	1.2086	3.234	1122	2.672708779	0.006173957	42.86105069	0.099009027
19.34891344	×ÔÉí³µÁ¾	Road 1	256.3108733	83.69162979	0.001087343	0.922675908	0.58431375	0	278.4058	984.4434	652.3721	1.2009	3.2417	1123	2.670346242	0.0061685	42.905659	0.099112072
19.36551366	×ÔÉí³µÁ¾	Road 1	256.6969868	83.73429794	0.001088311	0.922254682	0.58431375	0	278.7547	984.458	652.3545	1.1926	3.25	1124	2.810763878	0.006492865	42.95231832	0.099219855
19.3821883	×ÔÉí³µÁ¾	Road 1	257.0851461	83.80232391	0.001088311	0.921568334	0.58431375	0	279.3134	984.4814	652.3262	1.1793	3.2633	1125	3.905119744	0.009020827	43.01743478	0.099370274
19.39886148	×ÔÉí³µÁ¾	Road 1	257.4734551	83.84201889	0.001088311	0.921808064	0.58431375	0	279.6395	984.4951	652.3096	1.1715	3.272	1126	2.676707933	0.006183195	43.062064	0.099473368
19.4154903	×ÔÉí³µÁ¾	Road 1	257.8609149	83.88178253	0.001088311	0.920568526	0.58431375	0	279.9658	984.5088	652.2931	1.1638	3.2798	1127	2.685429356	0.006203342	43.10671952	0.099576522
19.43223348	×ÔÉí³µÁ¾	Road 1	258.2513291	83.94408188	0.001088311	0.921147883	0.58431375	0	280.4788	984.5303	652.2671	1.1516	3.292	1128	3.651180373	0.008434227	43.16785191	0.099717738
19.44890995	×ÔÉí³µÁ¾	Road 1	258.6403708	83.98358459	0.001088311	0.920378149	0.58431375	0	280.8055	984.5439	652.2505	1.1439	3.2997	1129	2.672016387	0.006172358	43.21241171	0.099820671
19.46566414	×ÔÉí³µÁ¾	Road 1	259.0314219	84.02584076	0.001094134	0.921475649	0.58431375	0	281.1556	984.5586	652.2328	1.1356	3.308	1130	2.784513975	0.006432227	43.25906397	0.099928438
19.48454251	×ÔÉí³µÁ¾	Road 1	259.4723945	84.09098969	0.001097053	0.920143664	0.58431375	0	281.6929	984.5811	652.2054	1.1229	3.3207	1131	3.46094024	0.007994772	43.32440089	0.100079366
19.50123145	×ÔÉí³µÁ¾	Road 1	259.8624084	84.13060226	0.001101929	0.920384586	0.58431375	0	282.0201	984.5947	652.1889	1.1151	3.3284	1132	2.679667569	0.006190032	43.36912169	0.100182671
19.51666603	×ÔÉí³µÁ¾	Road 1	260.2232903	84.17298203	0.0011078	0.920214415	0.58431375	0	282.3709	984.6094	652.1711	1.1078	3.3367	1133	2.951504094	0.006817974	43.41467692	0.100287904
19.53264934	×ÔÉí³µÁ¾	Road 1	260.5971909	84.21547165	0.001116645	0.920216322	0.58431375	0	282.7218	984.624	652.1533	1.0995	3.345	1134	2.889253771	0.006674176	43.46085677	0.100394579
19.54962675	×ÔÉí³µÁ¾	Road 1	260.994626	84.27468109	0.00112752	0.919376671	0.58431375	0	283.2135	984.6445	652.1284	1.0879	3.3565	1135	3.494553124	0.008072418	43.52018524	0.100531628
19.56557525	×ÔÉí³µÁ¾	Road 1	261.3681499	84.31431427	0.001140463	0.919374585	0.58431375	0	283.5414	984.6582	652.1118	1.0801	3.3642	1136	2.766082127	0.00638965	43.56430008	0.100633533
19.58224585	×ÔÉí³µÁ¾	Road 1	261.7588598	84.37337952	0.001157537	0.918865502	0.58431375	0	284.0337	984.6787	652.0868	1.0685	3.3758	1137	3.538777239	0.008174575	43.62329365	0.100769808
19.59894285	×ÔÉí³µÁ¾	Road 1	262.150385	84.41582108	0.001173761	0.919175327	0.58431375	0	284.3854	984.6943	652.069	1.0592	3.385	1138	2.810443072	0.006492123	43.67021961	0.100878207
19.61556581	×ÔÉí³µÁ¾	Road 1	262.5403558	84.45518646	0.001194254	0.918022633	0.58431375	0	284.714	984.708	652.0524	1.0515	3.3937	1139	2.684876385	0.006202064	43.71485019	0.100981304
19.63226501	×ÔÉí³µÁ¾	Road 1	262.9323898	84.51438904	0.00121707	0.918431342	0.58431375	0	285.207	984.7285	652.0274	1.0399	3.4053	1140	3.54576466	0.008190716	43.77406162	0.101118082
19.6488799	×ÔÉí³µÁ¾	Road 1	263.3226402	84.55675507	0.001243349	0.9173522	0.58431375	0	285.5594	984.7432	652.0095	1.0316	3.4135	1141	2.820491739	0.006515336	43.82092378	0.101226334
19.66565351	×ÔÉí³µÁ¾	Road 1	263.7168018	84.59609985	0.001271076	0.917828619	0.58431375	0	285.8884	984.7568	651.9928	1.0239	3.4212	1142	2.672412609	0.006173273	43.86574979	0.101329882
19.68222148	×ÔÉí³µÁ¾	Road 1	264.106326	84.63843842	0.001306859	0.917012155	0.58431375	0	286.2411	984.7715	651.975	1.0156	3.4294	1143	2.826995555	0.00653036	43.91258737	0.101438077
19.69885616	×ÔÉí³µÁ¾	Road 1	264.4976924	84.69765472	0.001339966	0.916929662	0.58431375	0	286.7353	984.792	651.9498	1.0041	3.441	1144	3.563469193	0.008231614	43.97186455	0.101575007
19.71551321	×ÔÉí³µÁ¾	Road 1	264.8897666	84.73694458	0.001371365	0.917399526	0.58431375	0	287.0648	984.8057	651.9331	0.9963	3.4487	1145	2.685966814	0.006204583	44.01660482	0.101678357
19.73216182	×ÔÉí³µÁ¾	Road 1	265.2818244	84.77633057	0.001406697	0.915989578	0.58431375	0	287.3946	984.8193	651.9164	0.9886	3.4563	1146	2.692179234	0.006218934	44.06142588	0.101781894
19.74893909	×ÔÉí³µÁ¾	Road 1	265.6772141	84.8411087	0.001439127	0.916721582	0.58431375	0	287.9367	984.8418	651.8889	0.976	3.4689	1147	3.789706682	0.008754222	44.12500683	0.101928766
19.76549497	×ÔÉí³µÁ¾	Road 1	266.0675668	84.88043289	0.001467318	0.915324807	0.58431375	0	288.2668	984.8555	651.8722	0.9683	3.4766	1148	2.702098792	0.006241848	44.16974244	0.102032105
19.78222239	×ÔÉí³µÁ¾	Road 1	266.4621461	84.91956482	0.00150307	0.916431844	0.58431375	0	288.5972	984.8691	651.8555	0.9606	3.4843	1149	2.676902859	0.006183646	44.21452012	0.102135541
19.7988952	×ÔÉí³µÁ¾	Road 1	266.8556192	84.95889587	0.001534522	0.915453732	0.58431375	0	288.9276	984.8828	651.8387	0.9529	3.492	1150	2.692393998	0.00621943	44.25940989	0.102239237
19.81547527	×ÔÉí³µÁ¾	Road 1	267.2472015	85.02355728	0.001562708	0.915755808	0.58431375	0	289.4709	984.9053	651.8112	0.9402	3.5045	1151	3.825775494	0.008837541	44.32284151	0.102385764
19.83231449	×ÔÉí³µÁ¾	Road 1	267.6450752	85.06004562	0.001598735	0.914786518	0.58431375	0	289.7781	984.918	651.7955	0.9331	3.5126	1152	2.554071228	0.005899905	44.36585008	0.102485114
19.84883151	×ÔÉí³µÁ¾	Road 1	268.0356062	85.11896667	0.001627699	0.914927602	0.58431375	0	290.2747	984.9385	651.7704	0.9215	3.5241	1153	3.585214711	0.008281846	44.42506714	0.102621905
19.86558716	×ÔÉí³µÁ¾	Road 1	268.4319616	85.15811234	0.001659577	0.914178014	0.58431375	0	290.6059	984.9521	651.7536	0.9139	3.5318	1154	2.681284399	0.006193767	44.4699938	0.102725686
19.88216796	×ÔÉí³µÁ¾	Road 1	268.8243625	85.19753952	0.001689269	0.914354563	0.58431375	0	290.9373	984.9658	651.7368	0.9062	3.5394	1155	2.713017441	0.00626707	44.5149778	0.102829599
19.89890968	×ÔÉí³µÁ¾	Road 1	269.220858	85.25909042	0.001715374	0.913506866	0.58431375	0	291.4584	984.9873	651.7103	0.8942	3.5514	1156	3.671018046	0.008480052	44.57643696	0.102971569
19.91547802	×ÔÉí³µÁ¾	Road 1	269.6134277	85.29828415	0.001735129	0.913338542	0.58431375	0	291.7902	985.001	651.6935	0.8865	3.5591	1157	2.706807368	0.006252725	44.62128426	0.103075167
19.9322179	×ÔÉí³µÁ¾	Road 1	270.0102448	85.3375946	0.001752372	0.913358569	0.58431375	0	292.1221	985.0146	651.6766	0.8789	3.5667	1158	2.695182842	0.006225872	44.66640131	0.103179387
19.94882216	×ÔÉí³µÁ¾	Road 1	270.4040401	85.37947311	0.001760368	0.913814306	0.58431375	0	292.4779	985.0293	651.6587	0.8708	3.5749	1159	2.824571018	0.006524759	44.71330122	0.103287726
19.96548214	×ÔÉí³µÁ¾	Road 1	270.7993898	85.42983856	0.001760368	0.912802696	0.58431375	0	292.8577	985.0449	651.6394	0.8621	3.5836	1160	3.195728128	0.007382132	44.76654198	0.103410712
19.98213699	×ÔÉí³µÁ¾	Road 1	271.1948636	85.48295746	0.001760368	0.912949979	0.58431375	0	293.3564	985.0654	651.6141	0.8506	3.5951	1161	3.320274914	0.007669835	44.82184064	0.103538452
19.99881786	×ÔÉí³µÁ¾	Road 1	271.59115	85.52498703	0.001760368	0.912152231	0.58431375	0	293.7128	985.0801	651.5961	0.8425	3.6042	1162	2.8270052	0.006530382	44.86899755	0.103647384
20.01548736	×ÔÉí³µÁ¾	Road 1	271.9873471	85.56398849	0.001760368	0.912181616	0.58431375	0	294.0456	985.0938	651.5792	0.8349	3.6119	1163	2.695167485	0.006225837	44.91392467	0.103751166
20.03220526	×ÔÉí³µÁ¾	Road 1	272.3850055	85.63101196	0.001760368	0.911491811	0.58431375	0	294.6165	985.1172	651.5502	0.8219	3.6249	1164	3.931666014	0.009082148	44.97965384	0.103903
20.04883408	×ÔÉí³µÁ¾	Road 1	272.7807381	85.67280121	0.001775092	0.911972344	0.58431375	0	294.9736	985.1309	651.532	0.8147	3.6321	1165	2.82651626	0.006529253	45.02665547	0.104011574
20.06548819	×ÔÉí³µÁ¾	Road 1	273.1772663	85.71465912	0.001833435	0.911363244	0.58431375	0	295.3308	985.1455	651.514	0.8066	3.6403	1166	2.827977066	0.006532627	45.07375292	0.104120369
20.10115447	×ÔÉí³µÁ¾	Road 1	274.0275727	85.82624588	0.001929705	0.911278367	0.58431375	0	296.2843	985.1846	651.4656	0.7849	3.6621	1167	3.286563276	0.007591961	45.1909724	0.104391146
20.11586143	×ÔÉí³µÁ¾	Road 1	274.3783558	85.86538467	0.002041049	0.909656882	0.58431375	0	296.6183	985.1982	651.4487	0.7773	3.6698	1168	2.942157155	0.006796383	45.23424261	0.1044911
20.13218051	×ÔÉí³µÁ¾	Road 1	274.767767	85.90437241	0.002402251	0.910697639	0.58431375	0	296.9524	985.2119	651.4318	0.7697	3.6784	1169	2.741362715	0.006332548	45.27897912	0.104594442
20.14889987	×ÔÉí³µÁ¾	Road 1	275.166911	85.9433876	0.002559947	0.910107732	0.58431375	0	297.2867	985.2256	651.4148	0.7621	3.686	1170	2.701219238	0.006239816	45.32414178	0.104698768
20.16546565	×ÔÉí³µÁ¾	Road 1	275.5626575	86.00186234	0.002754871	0.909421623	0.58431375	0	297.7885	985.2461	651.3893	0.7507	3.6975	1171	3.591489516	0.008296341	45.38363757	0.104836203
20.18223522	×ÔÉí³µÁ¾	Road 1	275.9634542	86.04081573	0.002995448	0.909240425	0.58431375	0	298.1232	985.2598	651.3723	0.7431	3.7051	1172	2.696008057	0.006227779	45.42884849	0.10494064
20.19887577	×ÔÉí³µÁ¾	Road 1	276.36136	86.08255005	0.003211624	0.909871817	0.58431375	0	298.4819	985.2734	651.3541	0.7359	3.7123	1173	2.834829998	0.006548457	45.47602162	0.10504961
20.21553648	×ÔÉí³µÁ¾	Road 1	276.7600179	86.14088745	0.003437959	0.908604324	0.58431375	0	298.9845	985.2939	651.3286	0.7246	3.7237	1174	3.575711345	0.008259893	45.53559551	0.105187226
20.23221552	×ÔÉí³µÁ¾	Road 1	277.1592945	86.17978592	0.003681229	0.909211993	0.58431375	0	299.3197	985.3076	651.3116	0.7179	3.7313	1175	2.7068157	0.006252744	45.58074259	0.105291515
20.24888943	×ÔÉí³µÁ¾	Road 1	277.558732	86.24102783	0.003874414	0.908286929	0.58431375	0	299.8468	985.3291	651.2849	0.706	3.7442	1176	3.707192083	0.008563614	45.64255596	0.105434304
20.26549222	×ÔÉí³µÁ¾	Road 1	277.9565551	86.26037064	0.004020761	0.908824801	0.58431375	0	300.0146	985.3359	651.2764	0.7022	3.748	1177	1.839302146	0.004248788	45.67309352	0.105504846
20.28218482	×ÔÉí³µÁ¾	Road 1	278.3568395	86.32711258	0.00412113	0.907470644	0.58431375	0	300.5902	985.3584	651.2472	0.6901	3.7601	1178	3.953155232	0.009131789	45.73908196	0.105657279
20.29889758	×ÔÉí³µÁ¾	Road 1	278.7578006	86.36873703	0.004139985	0.907691896	0.58431375	0	300.9502	985.373	651.229	0.682	3.7682	1179	2.830268271	0.00653792	45.78638356	0.105766546
20.3155286	×ÔÉí³µÁ¾	Road 1	279.1569801	86.40756683	0.004144708	0.907121241	0.58431375	0	301.2863	985.3857	651.2119	0.6754	3.7749	1180	2.715123663	0.006271936	45.83153883	0.105870855
20.33213836	×ÔÉí³µÁ¾	Road 1	279.555828	86.44631424	0.004144708	0.908009827	0.58431375	0	301.6226	985.3994	651.1948	0.6678	3.7826	1181	2.714734566	0.006271037	45.87662992	0.105975015
20.34883353	×ÔÉí³µÁ¾	Road 1	279.9569452	86.49343185	0.004144708	0.90699172	0.576470613	0	302.0311	985.416	651.1741	0.6587	3.7928	1182	3.08169662	0.007118719	45.92807936	0.106093863
20.36547518	×ÔÉí³µÁ¾	Road 1	280.3569811	86.53765182	0.004144708	0.906589985	0.576470613	0	302.4158	985.4307	651.1546	0.651	3.8003	1183	2.959756667	0.006837038	45.97733459	0.106207643
20.38219417	×ÔÉí³µÁ¾	Road 1	280.759185	86.60413284	0.004144708	0.902480841	0.576470613	0	302.9933	985.4541	651.1254	0.638	3.8133	1184	3.948488388	0.009121008	46.04334934	0.106360137
20.39880906	×ÔÉí³µÁ¾	Road 1	281.1590746	86.64532471	0.004144708	0.901297331	0.576470613	0	303.3544	985.4678	651.1069	0.6309	3.8214	1185	2.829869174	0.006536998	46.0903673	0.106468748
20.41552109	×ÔÉí³µÁ¾	Road 1	281.5614809	86.68382492	0.004123483	0.900672257	0.576470613	0	303.6916	985.4814	651.0898	0.6234	3.829	1186	2.699602851	0.006236083	46.13548314	0.106572966
20.43378365	×ÔÉí³µÁ¾	Road 1	282.0015288	86.74427032	0.004097641	0.899611235	0.576470613	0	304.2218	985.502	651.063	0.6125	3.8399	1187	3.454976994	0.007980997	46.19857987	0.106718719
20.44879266	×ÔÉí³µÁ¾	Road 1	282.3633289	86.77992783	0.004074242	0.899018407	0.576470613	0	304.5353	985.5146	651.0471	0.6055	3.8469	1188	2.756275162	0.006366996	46.23994882	0.106814282
20.46551348	×ÔÉí³µÁ¾	Road 1	282.7665843	86.82103729	0.004043955	0.898004413	0.576470613	0	304.8972	985.5283	651.0287	0.5984	3.855	1189	2.819522609	0.006513097	46.28709357	0.106923186
20.48215843	×ÔÉí³µÁ¾	Road 1	283.168275	86.87839966	0.00402771	0.89716059	0.576470613	0	305.4041	985.5479	651.0029	0.588	3.8653	1190	3.562301641	0.008228917	46.34638789	0.107060156
20.49936861	×ÔÉí³µÁ¾	Road 1	283.5838025	86.91943359	0.004009197	0.896981418	0.576470613	0	305.7663	985.5625	650.9846	0.58	3.8734	1191	2.766584866	0.006390811	46.39400131	0.107170143
20.51546702	×ÔÉí³µÁ¾	Road 1	283.9726706	86.96044006	0.003990741	0.896803379	0.576470613	0	306.1288	985.5762	650.9662	0.5729	3.8805	1192	2.890181491	0.006676319	46.44052865	0.107277621
20.53211673	×ÔÉí³µÁ¾	Road 1	284.375121	87.01779556	0.003967751	0.895306528	0.576470613	0	306.6365	985.5957	650.9404	0.5635	3.8918	1193	3.566485948	0.008238583	46.49990962	0.107414791
20.54887825	×ÔÉí³µÁ¾	Road 1	284.780452	87.05608978	0.003949422	0.894892812	0.576470613	0	306.9752	985.6094	650.9233	0.556	3.8994	1194	2.695551953	0.006226725	46.54509115	0.107519161
20.56545098	×ÔÉí³µÁ¾	Road 1	285.1813934	87.09417801	0.003924313	0.895382464	0.576470613	0	307.314	985.6221	650.9061	0.5495	3.9059	1195	2.706831964	0.006252782	46.58995076	0.107622786
20.58218317	×ÔÉí³µÁ¾	Road 1	285.5864578	87.15130005	0.00389251	0.894519389	0.576470613	0	307.8225	985.6416	650.8802	0.5392	3.9172	1196	3.548212586	0.008196371	46.64932012	0.107759929
20.598882	×ÔÉí³µÁ¾	Road 1	285.9908921	87.1895462	0.003863132	0.894117415	0.576470613	0	308.1617	985.6543	650.863	0.5326	3.9238	1197	2.703517337	0.006245125	46.6944657	0.107864216
20.61547563	×ÔÉí³µÁ¾	Road 1	286.3929537	87.22755203	0.003833903	0.893793523	0.58431375	0	308.501	985.667	650.8458	0.5261	3.9303	1198	2.704595843	0.006247616	46.73934477	0.107967886
20.63214258	×ÔÉí³µÁ¾	Road 1	286.7970693	87.28752365	0.003800361	0.895194948	0.58431375	0	309.0345	985.6875	650.8187	0.5153	3.9421	1199	3.692253056	0.008529105	46.80088333	0.10811004
20.6517273	×ÔÉí³µÁ¾	Road 1	287.2722289	87.34226303	0.003773669	0.897253156	0.58431375	0	309.5199	985.7061	650.7941	0.5055	3.9519	1200	3.088363124	0.007134119	46.86136809	0.10824976
20.66825019	×ÔÉí³µÁ¾	Road 1	287.6732911	87.3832901	0.003744893	0.897511721	0.58431375	0	309.8841	985.7197	650.7756	0.4984	3.9589	1201	2.854314497	0.006593466	46.9085296	0.108358703
20.68268224	×ÔÉí³µÁ¾	Road 1	288.0237558	87.42161179	0.003705292	0.89816761	0.58431375	0	310.2242	985.7334	650.7583	0.4907	3.9664	1202	2.985587111	0.006896706	46.95161773	0.108458237
20.69887266	×ÔÉí³µÁ¾	Road 1	288.4170928	87.45993347	0.003670326	0.897994757	0.58431375	0	310.5645	985.7461	650.7411	0.4841	3.9739	1203	2.768845202	0.006396032	46.9964465	0.108561791
20.71547252	×ÔÉí³µÁ¾	Road 1	288.8206294	87.51470032	0.003637746	0.898213327	0.58431375	0	311.0508	985.7637	650.7164	0.4754	3.9827	1204	3.475100199	0.008027481	47.05413268	0.108695046
20.73214752	×ÔÉí³µÁ¾	Road 1	289.2261704	87.5530426	0.003596756	0.89886874	0.58431375	0	311.3914	985.7773	650.6991	0.468	3.9902	1205	2.720374882	0.006284066	47.09949495	0.108799833
20.74886468	×ÔÉí³µÁ¾	Road 1	289.6329397	87.59678879	0.003566751	0.89974612	0.58431375	0	311.7809	985.792	650.6793	0.4606	3.9988	1206	2.96178828	0.006841731	47.14900764	0.108914208
20.76546235	×ÔÉí³µÁ¾	Road 1	290.0370542	87.6516243	0.003534787	0.899086416	0.58431375	0	312.268	985.8096	650.6546	0.4528	4.0075	1207	3.483531928	0.008046959	47.20682612	0.109047768
20.78216924	×ÔÉí³µÁ¾	Road 1	290.4440193	87.6928093	0.003500904	0.898678541	0.58431375	0	312.6335	985.8232	650.636	0.4458	4.0146	1208	2.849803179	0.006583045	47.25443749	0.109157751
20.83212242	×ÔÉí³µÁ¾	Road 1	291.6626954	87.82693176	0.003477736	0.899176955	0.58431375	0	313.8287	985.8682	650.5753	0.4226	4.0386	1209	3.019425047	0.006974872	47.40526735	0.109506168
20.84881795	×ÔÉí³µÁ¾	Road 1	292.0702727	87.88447266	0.003460951	0.899422646	0.58431375	0	314.3415	985.8867	650.5493	0.4134	4.0475	1210	3.600278166	0.008316643	47.46537591	0.109645018
20.86545666	×ÔÉí³µÁ¾	Road 1	292.4766406	87.92291794	0.003448397	0.898522735	0.58431375	0	314.6836	985.8994	650.532	0.4069	4.054	1211	2.739112674	0.00632735	47.51095123	0.109750297
20.88218665	×ÔÉí³µÁ¾	Road 1	292.8854274	87.96375275	0.003448397	0.898816645	0.58431375	0	315.0503	985.9131	650.5133	0.3999	4.0622	1212	2.839191993	0.006558534	47.55845088	0.109860022
20.89883967	×ÔÉí³µÁ¾	Road 1	293.2925112	88.00219116	0.003448397	0.899251938	0.58431375	0	315.3926	985.9258	650.496	0.3934	4.0688	1213	2.739490577	0.006328223	47.60407165	0.109965406
20.91550917	×ÔÉí³µÁ¾	Road 1	293.7001878	88.0431427	0.003448397	0.898448467	0.58431375	0	315.7596	985.9395	650.4773	0.3864	4.0759	1214	2.853546298	0.006591692	47.65163887	0.110075286
20.93213066	×ÔÉí³µÁ¾	Road 1	294.1069942	88.1090126	0.003448397	0.898436964	0.58431375	0	316.3472	985.9609	650.4474	0.3756	4.0877	1215	4.001686526	0.009243896	47.71815285	0.110228933
20.94881007	×ÔÉí³µÁ¾	Road 1	294.5154075	88.14990921	0.003448397	0.89774394	0.58431375	0	316.7146	985.9736	650.4288	0.3696	4.0937	1216	2.853025504	0.006590489	47.76573962	0.110338859
20.96547004	×ÔÉí³µÁ¾	Road 1	294.9235228	88.18829269	0.003448397	0.898188293	0.58431375	0	317.0577	985.9863	650.4114	0.3631	4.1002	1217	2.741403255	0.006332642	47.81141133	0.11044436
20.98213919	×ÔÉí³µÁ¾	Road 1	295.3320518	88.22917557	0.003448397	0.897396684	0.58431375	0	317.4255	986	650.3928	0.3561	4.1072	1218	2.8558446	0.006597001	47.85901581	0.110554327
20.9987933	×ÔÉí³µÁ¾	Road 1	295.7404278	88.27570953	0.003448397	0.897382438	0.58431375	0	317.8425	986.0146	650.3716	0.3491	4.1143	1219	3.117612848	0.007201686	47.91093688	0.110674264
21.0154892	×ÔÉí³µÁ¾	Road 1	296.150018	88.31656494	0.003448397	0.897438049	0.58431375	0	318.2106	986.0283	650.3529	0.3421	4.1222	1220	2.854122152	0.006593022	47.95858902	0.110784341
21.03212205	×ÔÉí³µÁ¾	Road 1	296.5583772	88.38492737	0.003448397	0.896895707	0.58431375	0	318.8246	986.0508	650.3217	0.3308	4.1335	1221	4.125590461	0.009530114	48.02720936	0.110942854
21.04879376	×ÔÉí³µÁ¾	Road 1	296.9678285	88.41745377	0.003448397	0.896419704	0.58431375	0	319.0457	986.0586	650.3104	0.328	4.1373	1222	2.478153146	0.005724534	48.0685244	0.111038291
21.06544933	×ÔÉí³µÁ¾	Road 1	297.377136	88.4692955	0.003448397	0.896568	0.58431375	0	319.5865	986.0781	650.283	0.3183	4.147	1223	3.367114796	0.007778035	48.12460564	0.111167839
21.08217236	×ÔÉí³µÁ¾	Road 1	297.788279	88.50758972	0.003448397	0.896164536	0.58431375	0	319.9309	986.0908	650.2655	0.3118	4.1545	1224	2.739520677	0.006328293	48.17041871	0.111273667
21.09879751	×ÔÉí³µÁ¾	Road 1	298.197192	88.54576035	0.003448397	0.895980299	0.58431375	0	320.2754	986.1025	650.248	0.3064	4.1599	1225	2.745199744	0.006341411	48.21605808	0.111379094
21.11546885	×ÔÉí³µÁ¾	Road 1	298.6075434	88.61103973	0.003446308	0.895935476	0.58431375	0	320.8663	986.124	650.218	0.2956	4.1707	1226	3.986608787	0.009209066	48.28252019	0.111532622
21.13214936	×ÔÉí³µÁ¾	Road 1	299.0182849	88.64656677	0.003446308	0.895550609	0.58431375	0	321.1866	986.1357	650.2017	0.2897	4.1766	1227	2.620787964	0.00605402	48.32623626	0.111633606
21.14879907	×ÔÉí³µÁ¾	Road 1	299.4284445	88.68468933	0.003446308	0.895374775	0.58431375	0	321.5316	986.1475	650.1842	0.2843	4.183	1228	2.744230298	0.006339172	48.37192691	0.111739151
21.16545428	×ÔÉí³µÁ¾	Road 1	299.8390166	88.74457855	0.003446308	0.894714594	0.58431375	0	322.0741	986.167	650.1567	0.2746	4.1927	1229	3.747045335	0.008655675	48.43433474	0.111883313
21.18211683	×ÔÉí³µÁ¾	Road 1	300.2499453	88.78256378	0.003446308	0.895168662	0.58431375	0	322.4195	986.1787	650.1391	0.2691	4.1981	1230	2.739255015	0.006327679	48.4799777	0.111988748
21.19884315	×ÔÉí³µÁ¾	Road 1	300.6626354	88.82312393	0.003446308	0.884999573	0.58431375	0	322.7898	986.1924	650.1203	0.2621	4.2051	1231	2.851814721	0.006587692	48.52767807	0.112098936
21.21551192	×ÔÉí³µÁ¾	Road 1	301.0741678	88.87975845	0.003446308	0.893170714	0.58431375	0	323.3084	986.2109	650.0939	0.2529	4.2152	1232	3.600172788	0.008316399	48.58768854	0.112237561
21.23213268	×ÔÉí³µÁ¾	Road 1	301.4847016	88.92024994	0.003446308	0.88876152	0.58431375	0	323.6791	986.2236	650.0751	0.2469	4.2211	1233	2.863265364	0.006614143	48.63527817	0.112347493
21.24879779	×ÔÉí³µÁ¾	Road 1	301.8964924	88.95511093	0.003446308	0.876616955	0.58431375	0	324.0005	986.2344	650.0588	0.242	4.226	1234	2.599667119	0.006005231	48.67860191	0.11244757
21.26550762	×ÔÉí³µÁ¾	Road 1	302.3096556	89.01273422	0.003446308	0.86478132	0.58431375	0	324.5447	986.2529	650.0311	0.2333	4.2357	1235	3.64418149	0.008418059	48.73949556	0.112588235
21.28218995	×ÔÉí³µÁ¾	Road 1	302.7223064	89.04884491	0.003446308	0.852332711	0.58431375	0	324.8912	986.2646	650.0135	0.2278	4.2411	1236	2.658054093	0.006140105	48.78383811	0.112690666
21.29877332	×ÔÉí³µÁ¾	Road 1	303.1326736	89.08457794	0.00345467	0.84812814	0.58431375	0	325.2379	986.2754	649.9958	0.2233	4.2455	1237	2.651418726	0.006124777	48.82780756	0.112792235
21.31548058	×ÔÉí³µÁ¾	Road 1	303.5463776	89.14291534	0.003463046	0.836929858	0.58431375	0	325.8077	986.292	649.9669	0.218	4.2528	1238	3.682387692	0.008506316	48.88933018	0.112934353
21.33215156	×ÔÉí³µÁ¾	Road 1	303.9593468	89.17831879	0.003467239	0.83602792	0.58431375	0	326.1548	986.3018	649.9492	0.2145	4.2572	1239	2.629938089	0.006075157	48.93317381	0.113035631
21.34883133	×ÔÉí³µÁ¾	Road 1	304.3727797	89.23134842	0.003471435	0.838268936	0.58431375	0	326.6756	986.3145	649.9227	0.2113	4.2624	1240	3.444946146	0.007957826	48.99063472	0.113168366
21.36545721	×ÔÉí³µÁ¾	Road 1	304.7850423	89.26713638	0.003481941	0.841391265	0.58431375	0	327.0231	986.3232	649.905	0.2097	4.2669	1241	2.654535532	0.006131977	49.03476873	0.113270316
21.38216668	×ÔÉí³µÁ¾	Road 1	305.1995567	89.30579453	0.003494576	0.84945029	0.58431375	0	327.3955	986.332	649.886	0.2077	4.2708	1242	2.77976068	0.006421247	49.08121703	0.113377611
21.3988798	×ÔÉí³µÁ¾	Road 1	305.6144168	89.3606781	0.003513585	0.857809901	0.58431375	0	327.9172	986.3428	649.8591	0.2074	4.276	1243	3.530218905	0.008154806	49.14021803	0.113513904
21.41547857	×ÔÉí³µÁ¾	Road 1	306.0266217	89.40048981	0.003532663	0.863869846	0.58431375	0	328.2901	986.3506	649.8404	0.2073	4.28	1244	2.847978273	0.00657883	49.18749095	0.113623104
21.43213268	×ÔÉí³µÁ¾	Road 1	306.440387	89.44067917	0.003556075	0.869693339	0.58431375	0	328.6631	986.3584	649.8214	0.2072	4.284	1245	2.860483597	0.006607717	49.23512976	0.11373315
21.44887586	×ÔÉí³µÁ¾	Road 1	306.8565532	89.48108826	0.003583876	0.875496566	0.58431375	0	329.0363	986.3652	649.8023	0.2071	4.287	1246	2.861858898	0.006610894	49.2830464	0.113843837
21.46547939	×ÔÉí³µÁ¾	Road 1	307.2695237	89.54082642	0.003618291	0.881865263	0.58431375	0	329.5839	986.376	649.7744	0.2083	4.2937	1247	3.779604815	0.008730887	49.34580117	0.113988801
21.48213497	×ÔÉí³µÁ¾	Road 1	307.6839525	89.57622299	0.003665971	0.885673344	0.58431375	0	329.9077	986.3818	649.7578	0.2083	4.2966	1248	2.641535732	0.006101948	49.38979747	0.114090432
21.49886459	×ÔÉí³µÁ¾	Road 1	308.1004012	89.61440735	0.003711873	0.888730824	0.58431375	0	330.2565	986.3887	649.74	0.2087	4.3001	1249	2.764249581	0.006385417	49.43604233	0.114197258
21.51543513	×ÔÉí³µÁ¾	Road 1	308.5130912	89.658181	0.003760369	0.890574813	0.58431375	0	330.6554	986.3955	649.7197	0.2101	4.3036	1250	3.043659272	0.007030853	49.4864774	0.114313763
21.53209291	×ÔÉí³µÁ¾	Road 1	308.9282311	89.71806335	0.003822701	0.891792953	0.58431375	0	331.2041	986.4063	649.6917	0.2103	4.3093	1251	3.784119256	0.008741315	49.54951241	0.114459374
21.54886615	×ÔÉí³µÁ¾	Road 1	309.3464137	89.75350113	0.003903848	0.892145336	0.592156887	0	331.5285	986.4121	649.675	0.2113	4.3122	1252	2.636513502	0.006090346	49.59373529	0.114561529
21.56546601	×ÔÉí³µÁ¾	Road 1	309.7605365	89.81052017	0.003983835	0.894123495	0.592156887	0	332.0529	986.4209	649.6483	0.213	4.3154	1253	3.663652594	0.008463037	49.65455142	0.114702014
21.582185	×ÔÉí³µÁ¾	Road 1	310.1778078	89.8485054	0.00408593	0.895753264	0.592156887	0	332.4026	986.4277	649.6304	0.2135	4.3188	1254	2.762570444	0.006381538	49.70073882	0.114808707
21.59880686	×ÔÉí³µÁ¾	Road 1	310.5928432	89.88932648	0.004175494	0.895865262	0.592156887	0	332.7775	986.4346	649.6113	0.2134	4.3205	1255	2.906476375	0.00671396	49.74904984	0.114920305
21.61549946	×ÔÉí³µÁ¾	Road 1	311.0098969	89.94366074	0.004271177	0.896968186	0.592156887	0	333.2776	986.4424	649.5858	0.2117	4.3184	1256	3.528872223	0.008151695	49.8079559	0.115056378
21.63219096	×ÔÉí³µÁ¾	Road 1	311.4271124	89.98445435	0.004380553	0.896265864	0.592156887	0	333.6529	986.4492	649.5667	0.2097	4.3184	1257	2.899989347	0.006698975	49.85636107	0.115168194
21.64900966	×ÔÉí³µÁ¾	Road 1	311.8476851	90.02254257	0.004476844	0.89687109	0.592156887	0	334.0033	986.4551	649.5487	0.2083	4.317	1258	2.76162746	0.006379359	49.90280805	0.115275487
21.66542734	×ÔÉí³µÁ¾	Road 1	312.2584906	90.07969894	0.004554382	0.897377551	0.592156887	0	334.5292	986.4629	649.5219	0.209	4.3153	1259	3.70990631	0.008569884	49.96371611	0.115416184
21.68213497	×ÔÉí³µÁ¾	Road 1	312.6767409	90.12055435	0.004627722	0.897595048	0.592156887	0	334.9051	986.4688	649.5026	0.2089	4.3144	1260	2.90496481	0.006710469	50.01225119	0.1155283
21.69877332	×ÔÉí³µÁ¾	Road 1	313.0934331	90.15869064	0.004665964	0.89783287	0.592156887	0	335.2561	986.4746	649.4847	0.2084	4.3129	1261	2.786722334	0.006437329	50.05861765	0.115635407
21.71541497	×ÔÉí³µÁ¾	Road 1	313.5103836	90.19671021	0.004678758	0.89744705	0.592156887	0	335.6072	986.4795	649.4668	0.2089	4.3115	1262	2.781951841	0.006426309	50.10491392	0.115742351
21.73209437	×ÔÉí³µÁ¾	Road 1	313.9285951	90.26468811	0.004678758	0.898231208	0.592156887	0	336.2346	986.4893	649.4347	0.2096	4.3099	1263	4.180063717	0.009655947	50.17463489	0.115903407
21.7488097	×ÔÉí³µÁ¾	Road 1	314.3478844	90.302845	0.004678758	0.898492992	0.592156887	0	336.5861	986.4941	649.4167	0.2111	4.3084	1264	2.78342466	0.006429711	50.22116074	0.116010881
21.76548581	×ÔÉí³µÁ¾	Road 1	314.7663666	90.34099503	0.004678758	0.898334861	0.592156887	0	336.9378	986.499	649.3988	0.2126	4.307	1265	2.788343426	0.006441073	50.26765945	0.116118293
21.78212379	×ÔÉí³µÁ¾	Road 1	315.184081	90.3818573	0.004645543	0.897750199	0.592156887	0	337.3147	986.5039	649.3795	0.2136	4.305	1266	2.92083458	0.006747128	50.31625625	0.116230552
21.7987977	×ÔÉí³µÁ¾	Road 1	315.602899	90.42541122	0.004607412	0.89799422	0.592156887	0	337.717	986.5098	649.359	0.2151	4.3036	1267	3.044054278	0.007031765	50.36701253	0.116347799
21.81551705	×ÔÉí³µÁ¾	Road 1	316.0231497	90.48806076	0.004561932	0.898157358	0.592156887	0	338.2957	986.5176	649.3294	0.2178	4.301	1268	3.933017221	0.00908527	50.43277005	0.116499699
21.83215101	×ÔÉí³µÁ¾	Road 1	316.4414297	90.52616959	0.00450176	0.897591412	0.592156887	0	338.648	986.5225	649.3114	0.2193	4.2995	1269	2.796042391	0.006458858	50.47927929	0.116607135
21.84876553	×ÔÉí³µÁ¾	Road 1	316.8593969	90.56425781	0.004432229	0.89742595	0.592156887	0	339.0006	986.5273	649.2933	0.2208	4.298	1270	2.798219004	0.006463886	50.52577036	0.11671453
21.86546913	×ÔÉí³µÁ¾	Road 1	317.2798828	90.62414703	0.004356088	0.896767855	0.592156887	0	339.5549	986.5342	649.265	0.2231	4.2948	1271	3.811916987	0.008805528	50.58944309	0.116861614
21.89895623	×ÔÉí³µÁ¾	Road 1	318.1237505	90.71921997	0.00426395	0.897937894	0.592156887	0	340.4375	986.5459	649.2198	0.2274	4.2896	1272	3.230255872	0.007461891	50.697615	0.117111491
21.91540947	×ÔÉí³µÁ¾	Road 1	318.5385554	90.76008224	0.004161267	0.896177232	0.58431375	0	340.8161	986.5508	649.2006	0.2294	4.2877	1273	2.953428691	0.00682242	50.74620847	0.117223742
21.9321039	×ÔÉí³µÁ¾	Road 1	318.9596172	90.79809494	0.003922035	0.895175517	0.58431375	0	341.1696	986.5557	649.1824	0.2299	4.2862	1274	2.792513264	0.006450706	50.7928279	0.117331432
21.94919825	×ÔÉí³µÁ¾	Road 1	319.3910359	90.85501785	0.003795904	0.891733825	0.58431375	0	341.7	986.5625	649.1554	0.2327	4.2834	1275	3.620378751	0.008363075	50.85471591	0.117474394
21.96543412	×ÔÉí³µÁ¾	Road 1	319.8009582	90.89259109	0.003672505	0.891186535	0.576470613	0	342.0539	986.5664	649.1373	0.2353	4.2809	1276	2.824360256	0.006524272	50.90057186	0.117580321
21.98213405	×ÔÉí³µÁ¾	Road 1	320.2227726	90.93041153	0.003539038	0.888657212	0.568627477	0	342.4078	986.5713	649.1191	0.2368	4.2793	1277	2.786513974	0.006436847	50.94710645	0.117687816
21.99880356	×ÔÉí³µÁ¾	Road 1	320.644092	90.98947678	0.003412994	0.88222754	0.552941203	0	342.9644	986.5781	649.0907	0.2391	4.276	1278	3.79299901	0.008761828	51.01033387	0.117833871
22.01550642	×ÔÉí³µÁ¾	Road 1	321.0664379	91.02901382	0.003296057	0.875314772	0.545098066	0	343.3441	986.583	649.0713	0.2411	4.274	1279	2.869712579	0.006629036	51.05826629	0.117944595
22.03210079	×ÔÉí³µÁ¾	Road 1	321.4862107	91.06600342	0.003154175	0.867880762	0.545098066	0	343.6986	986.5869	649.0531	0.2437	4.2714	1280	2.762171834	0.006380617	51.10410278	0.118050477
22.04883554	×ÔÉí³µÁ¾	Road 1	321.9097883	91.12049561	0.003027907	0.861081362	0.53725493	0	344.2306	986.5938	649.0259	0.2455	4.2685	1281	3.572101586	0.008251555	51.16388102	0.118188565
22.0654387	×ÔÉí³µÁ¾	Road 1	322.3301303	91.14116364	0.002899466	0.858877778	0.529411793	0	344.4334	986.5967	649.0156	0.2463	4.2678	1282	1.989238124	0.00459514	51.19690866	0.118264859
22.08211957	×ÔÉí³µÁ¾	Road 1	322.7527247	91.20266647	0.002763877	0.849267364	0.529411793	0	345.042	986.6035	648.9845	0.2505	4.2635	1283	3.914383521	0.009042226	51.26220399	0.118415691
22.1155231	×ÔÉí³µÁ¾	Road 1	323.5996276	91.27329483	0.00263957	0.837037921	0.513725519	0	345.7525	986.6123	648.9482	0.2546	4.2593	1284	2.677056333	0.006184	51.35162711	0.118622259
22.13213616	×ÔÉí³µÁ¾	Road 1	324.0210819	91.32789688	0.002519048	0.827039838	0.498039216	0	346.3111	986.6191	648.9196	0.2569	4.255	1285	3.603587785	0.008324288	51.41149373	0.118760551
22.14876645	×ÔÉí³µÁ¾	Road 1	324.4431318	91.36220856	0.002251168	0.818825722	0.466666669	0	346.6668	986.624	648.9014	0.2584	4.2534	1286	2.639291846	0.006096764	51.45538591	0.118861941
22.16545465	×ÔÉí³µÁ¾	Road 1	324.8668852	91.4126152	0.00213072	0.801422	0.443137258	0	347.2006	986.6299	648.8741	0.2622	4.2495	1287	3.39647735	0.007845863	51.512067	0.118992875
22.18212159	×ÔÉí³µÁ¾	Road 1	325.2902504	91.44536819	0.001985579	0.783450842	0.427450985	0	347.5565	986.6338	648.8559	0.2638	4.2469	1288	2.563957653	0.005922742	51.55480034	0.119091589
22.19882262	×ÔÉí³µÁ¾	Road 1	325.7146391	91.47935028	0.001851323	0.760800362	0.403921574	0	347.9381	986.6387	648.8364	0.2658	4.2449	1289	2.619787933	0.00605171	51.5985535	0.119192659
22.21622414	×ÔÉí³µÁ¾	Road 1	326.1570169	91.51844101	0.001711442	0.736875415	0.380392164	0	348.3198	986.6436	648.8169	0.2679	4.2428	1290	2.788106567	0.006440526	51.64707079	0.119304734
22.23208173	×ÔÉí³µÁ¾	Road 1	326.5603094	91.55573959	0.001555322	0.706114769	0.36470589	0	348.8545	986.6494	648.7896	0.2717	4.2389	1291	2.872753269	0.00663606	51.69262572	0.119409965
22.2488557	×ÔÉí³µÁ¾	Road 1	326.9870428	91.5847435	0.001419379	0.797498584	0.34117648	0	349.211	986.6533	648.7712	0.2742	4.2364	1292	2.380646356	0.005499293	51.73255863	0.11950221
22.2662125	×ÔÉí³µÁ¾	Road 1	327.4288248	91.63068008	0.001287259	1.288249969	0.309803933	0	349.5677	986.6582	648.7531	0.2758	4.2348	1293	3.107924588	0.007179306	51.78650225	0.11962682
22.28208402	×ÔÉí³µÁ¾	Road 1	327.8332651	91.73571625	0.001143463	1.42701745	0.278431386	0	350.1287	986.6641	648.7244	0.2791	4.2306	1294	6.257023875	0.014453725	51.8858107	0.119856223
22.29876342	×ÔÉí³µÁ¾	Road 1	328.2585446	91.79022217	0.001027485	1.029990792	0.239215687	0	350.486	986.6689	648.7061	0.2807	4.229	1295	3.605378615	0.008328425	51.94594627	0.119995136
22.31541424	×ÔÉí³µÁ¾	Road 1	328.6832633	91.82659378	0.00092136	0.768722117	0.215686277	0	350.8435	986.6729	648.6877	0.2833	4.2264	1296	2.74730271	0.006346269	51.99169109	0.120100806
22.33211307	×ÔÉí³µÁ¾	Road 1	329.1094505	91.8791153	0.000811602	0.905418098	0.184313729	0	351.4055	986.6797	648.6591	0.2866	4.2231	1297	3.511260537	0.008111012	52.05032504	0.120236251
22.34877341	×ÔÉí³µÁ¾	Road 1	329.5348461	91.92032776	0.000724135	0.982067347	0.152941182	0	351.7633	986.6836	648.6407	0.2892	4.2205	1298	2.979525468	0.006882704	52.09996496	0.120350919
22.36547847	×ÔÉí³µÁ¾	Road 1	329.9616522	91.97821884	0.000643189	0.80122149	0.121568628	0	352.3004	986.6895	648.6133	0.293	4.2167	1299	3.769138403	0.00870671	52.16292865	0.120496365
22.38215238	×ÔÉí³µÁ¾	Road 1	330.3877962	92.00712662	0.000564125	0.656822503	0.082352944	0	352.6586	986.6934	648.595	0.2956	4.2141	1300	2.393910439	0.005529933	52.20284449	0.120588571
22.39902863	×ÔÉí³µÁ¾	Road 1	330.8192273	92.03184586	0.000505059	0.629598916	0.05882353	0	353.0169	986.6982	648.5767	0.2962	4.2125	1301	2.180605182	0.005037198	52.23964492	0.12067358
22.4154925	×ÔÉí³µÁ¾	Road 1	331.2402903	92.06989288	0.000454583	0.646757483	0.035294119	0	353.5545	986.7041	648.5491	0.3001	4.2086	1302	2.854455665	0.006593793	52.28664031	0.120782139
22.43212315	×ÔÉí³µÁ¾	Road 1	331.6657289	92.09374695	0.000406582	0.589658797	0.019607844	0	353.9131	986.708	648.5308	0.3026	4.206	1303	2.157690361	0.004984265	52.3225241	0.120865031
22.44882308	×ÔÉí³µÁ¾	Road 1	332.0930343	92.11411972	0.000369106	0.508345604	0.011764706	0	354.2717	986.7119	648.5125	0.3052	4.2035	1304	1.987459709	0.004591032	52.35571455	0.120941701
22.46539728	×ÔÉí³µÁ¾	Road 1	332.5172378	92.13912048	0.000334447	0.45641759	0	0	354.8098	986.7188	648.4849	0.3082	4.2006	1305	2.217570582	0.005122588	52.39246901	0.121026603
22.48215953	×ÔÉí³µÁ¾	Road 1	332.9463271	92.15481033	0.000298335	0.461415172	0	0	355.1686	986.7227	648.4666	0.3108	4.198	1306	1.762144606	0.004070554	52.42200651	0.121094835
22.49877552	×ÔÉí³µÁ¾	Road 1	333.3717466	92.17085724	0.000269097	0.452463537	0	0	355.5274	986.7266	648.4482	0.3135	4.1954	1307	1.786074937	0.004125833	52.45168392	0.12116339
22.51596664	×ÔÉí³µÁ¾	Road 1	333.8119905	92.1916832	0.000241834	0.330502748	0	0.011764706	356.0915	986.7334	648.4193	0.3169	4.192	1308	1.982111524	0.004578678	52.48575863	0.121242102
22.53205589	×ÔÉí³µÁ¾	Road 1	334.2240438	92.19772568	0.000210267	0.214277789	0	0.011764706	356.4504	986.7373	648.401	0.3196	4.1894	1309	1.316318837	0.003040697	52.50693721	0.121291025
22.54886615	×ÔÉí³µÁ¾	Road 1	334.6545834	92.20214767	0.000183636	0.196301788	0	0.011764706	356.989	986.7432	648.3735	0.3235	4.1855	1310	1.226726008	0.002833737	52.5275588	0.121338661
22.56542752	×ÔÉí³µÁ¾	Road 1	335.078775	92.2079155	0.000158281	0.275269181	0	0.011764706	357.3736	986.748	648.3538	0.3256	4.1835	1311	1.294685567	0.002990724	52.54900057	0.121388191
22.58210473	×ÔÉí³µÁ¾	Road 1	335.5059674	92.21523514	0.000132023	0.270553648	0	0.011764706	357.7583	986.752	648.3341	0.3288	4.1804	1312	1.36698545	0.003157736	52.57179807	0.121440854
22.59939005	×ÔÉí³µÁ¾	Road 1	335.9487649	92.22108536	0.000111578	0.223066658	0	0.011764706	358.1174	986.7559	648.3157	0.3314	4.1778	1313	1.28700196	0.002972975	52.59404431	0.121492242
22.61542578	×ÔÉí³µÁ¾	Road 1	336.3595668	92.22445679	9.39E-05	0.184503093	0	0.011764706	358.656	986.7617	648.2882	0.3354	4.1739	1314	1.184863694	0.002737035	52.61304447	0.121536133
22.64886267	×ÔÉí³µÁ¾	Road 1	337.2162161	92.23161163	7.67E-05	0.207905442	0	0.011764706	359.5538	986.7725	648.2423	0.341	4.1683	1315	1.187906482	0.002744064	52.65276436	0.121627886
22.66542954	×ÔÉí³µÁ¾	Road 1	337.6406712	92.23457108	6.41E-05	0.194742039	0	0.011764706	359.9129	986.7764	648.2239	0.3436	4.1657	1316	1.1597666	0.002679061	52.67197806	0.121672269
22.68207852	×ÔÉí³µÁ¾	Road 1	338.0672401	92.23675461	4.36E-05	0.180978641	0	0.011764706	360.2721	986.7803	648.2055	0.3463	4.1631	1317	1.121937332	0.002591675	52.69065718	0.121715418
22.69879971	×ÔÉí³µÁ¾	Road 1	338.4956716	92.23943939	3.64E-05	0.177642763	0	0.011764706	360.8364	986.7871	648.1766	0.3498	4.1597	1318	1.145404746	0.002645885	52.70980971	0.12175966
22.71543623	×ÔÉí³µÁ¾	Road 1	338.9219429	92.241465	3.05E-05	0.185055405	0	0.011764706	361.1956	986.791	648.1583	0.3524	4.1571	1319	1.114490563	0.002574473	52.72835095	0.121802491
22.73214276	×ÔÉí³µÁ¾	Road 1	339.3500186	92.24371719	2.50E-05	0.184555754	0	0.011764706	361.5548	986.7949	648.1399	0.355	4.1545	1320	1.124915553	0.002598555	52.74714438	0.121845904
22.74874849	×ÔÉí³µÁ¾	Road 1	339.7755244	92.24655304	2.12E-05	0.176677212	0	0.011764706	362.0935	986.8008	648.1124	0.3589	4.1505	1321	1.153611778	0.002664843	52.76630095	0.121890155
22.76541653	×ÔÉí³µÁ¾	Road 1	340.2026345	92.24817352	1.85E-05	0.174619913	0	0.011764706	362.4527	986.8057	648.094	0.3605	4.1489	1322	1.094990309	0.002529428	52.78455229	0.121932316
22.78210986	×ÔÉí³µÁ¾	Road 1	340.6304025	92.25027466	1.63E-05	0.175748587	0	0.011764706	362.8119	986.8096	648.0756	0.3632	4.1463	1323	1.117845043	0.002582222	52.80321285	0.121975422
22.79883142	×ÔÉí³µÁ¾	Road 1	341.0588993	92.25149002	1.47E-05	0.177146569	0	0.011764706	363.1711	986.8135	648.0573	0.3658	4.1436	1324	1.075456146	0.002484304	52.82119615	0.122016963
22.81539169	×ÔÉí³µÁ¾	Road 1	341.483276	92.25426407	1.35E-05	0.175079405	0	0.011764706	363.7869	986.8203	648.0258	0.3701	4.1393	1325	1.151081776	0.002658999	52.84025838	0.122060997
22.83211178	×ÔÉí³µÁ¾	Road 1	341.9117565	92.25606995	1.22E-05	0.173752993	0	0.011764706	364.1461	986.8242	648.0073	0.3727	4.1367	1326	1.10365717	0.002549448	52.85871163	0.122103624
22.84878276	×ÔÉí³µÁ¾	Road 1	342.338985	92.25750504	1.09E-05	0.173584312	0	0.011764706	364.5053	986.8281	647.989	0.3753	4.1341	1327	1.086190783	0.002509101	52.87681949	0.122145453
22.86538702	×ÔÉí³µÁ¾	Road 1	342.764515	92.25994949	9.40E-06	0.174423277	0	0.011764706	365.0698	986.835	647.9601	0.3786	4.1306	1328	1.134954525	0.002621745	52.89566457	0.122188985
22.89885213	×ÔÉí³µÁ¾	Road 1	343.6221801	92.2630806	7.19E-06	0.173963696	0	0.011764706	365.7883	986.8428	647.9233	0.3838	4.1254	1329	1.092201728	0.002522986	52.93221522	0.122273417
22.91537978	×ÔÉí³µÁ¾	Road 1	344.0457719	92.26542206	5.06E-06	0.173784047	0	0.011764706	366.3528	986.8496	647.8945	0.3872	4.122	1330	1.130579338	0.002611638	52.95090104	0.122316581
22.93206138	×ÔÉí³µÁ¾	Road 1	344.4733172	92.26708374	1.88E-06	0.173942745	0	0.011764706	366.7121	986.8535	647.8761	0.3898	4.1194	1331	1.097059488	0.002534207	52.96920175	0.122358856
22.94875802	×ÔÉí³µÁ¾	Road 1	344.9012585	92.2694252	9.98E-07	0.173524186	0	0.011764706	367.251	986.8594	647.8486	0.3936	4.1154	1332	1.129472091	0.002609081	52.98806013	0.122402419
22.9820776	×ÔÉí³µÁ¾	Road 1	345.7552846	92.27287216	4.31E-07	0.173913866	0	0.011764706	368.0466	986.8682	647.8079	0.3992	4.1098	1333	1.100170616	0.002541394	53.02471737	0.122487097
22.99880283	×ÔÉí³µÁ¾	Road 1	346.1839819	92.27442398	1.13E-07	0.174342528	0	0.011764706	368.4059	986.873	647.7896	0.4008	4.1081	1334	1.091677709	0.002521776	53.04297592	0.122529274
23.01540599	×ÔÉí³µÁ¾	Road 1	346.6095613	92.27675171	4.73E-12	0.173903018	0	0.011764706	368.9448	986.8789	647.762	0.4047	4.1042	1335	1.129507952	0.002609163	53.06172932	0.122572595
23.03210885	×ÔÉí³µÁ¾	Road 1	347.0377035	92.27828979	-1.04E-08	0.173483372	0	0.011764706	369.3041	986.8828	647.7435	0.4073	4.1016	1336	1.09115427	0.002520566	53.07995472	0.122614695
23.04872814	×ÔÉí³µÁ¾	Road 1	347.46371	92.27973175	-6.92E-08	0.174063563	0	0.011764706	369.6634	986.8867	647.7251	0.4099	4.099	1337	1.086923167	0.002510793	53.09801861	0.122656423
23.06542258	×ÔÉí³µÁ¾	Road 1	347.8916533	92.28201828	-2.12E-07	0.173213631	0	0.011764706	370.2024	986.8926	647.6976	0.4138	4.095	1338	1.126975995	0.002603315	53.11683284	0.122699884
23.08208072	×ÔÉí³µÁ¾	Road 1	348.318674	92.2836525	-4.85E-07	0.173204839	0	0.011764706	370.5874	986.8975	647.678	0.4158	4.093	1339	1.095999585	0.002531759	53.13509016	0.122742058
23.09881987	×ÔÉí³µÁ¾	Road 1	348.7477786	92.28522491	-1.02E-06	0.171895325	0	0.011764706	370.9724	986.9014	647.6582	0.4189	4.0899	1340	1.09269023	0.002524114	53.15338087	0.12278431
23.11544319	×ÔÉí³µÁ¾	Road 1	349.173924	92.28742218	-1.79E-06	0.172235727	0	0.011764706	371.5114	986.9082	647.6306	0.4218	4.087	1341	1.123209147	0.002594613	53.17205233	0.122827441
23.13202253	×ÔÉí³µÁ¾	Road 1	349.5989483	92.2888298	-3.00E-06	0.170986459	0	0.011764706	371.8707	986.9121	647.6122	0.4244	4.0844	1342	1.085515967	0.002507542	53.19004947	0.122869014
23.14873456	×ÔÉí³µÁ¾	Road 1	350.0273808	92.29024429	-4.34E-06	0.170886606	0	0.011764706	372.2301	986.916	647.5939	0.427	4.0818	1343	1.085318042	0.002507085	53.20818733	0.122910913
23.16542716	×ÔÉí³µÁ¾	Road 1	350.4553249	92.29230423	-5.85E-06	0.169618115	0	0.011764706	372.7691	986.9219	647.5663	0.4308	4.0779	1344	1.116253597	0.002578546	53.22682051	0.122953955
23.18214982	×ÔÉí³µÁ¾	Road 1	350.8840457	92.29365005	-8.15E-06	0.169968829	0	0.011764706	373.1285	986.9258	647.548	0.4334	4.0753	1345	1.082029152	0.002499487	53.24491491	0.122995753
23.19898391	×ÔÉí³µÁ¾	Road 1	351.3156327	92.29563446	-1.04E-05	0.169159606	0	0.011764706	373.6675	986.9326	647.5204	0.4363	4.0724	1346	1.111877103	0.002568436	53.26363235	0.123038991
23.21537007	×ÔÉí³µÁ¾	Road 1	351.7357427	92.29714508	-1.29E-05	0.168580294	0	0.011764706	374.0269	986.9365	647.502	0.4389	4.0698	1347	1.091398589	0.002521131	53.28151618	0.123080302
23.23258171	×ÔÉí³µÁ¾	Road 1	352.1770239	92.29870377	-1.54E-05	0.167761296	0	0.011764706	374.5403	986.9424	647.4757	0.4424	4.0664	1348	1.090112703	0.00251816	53.30027881	0.123123644
23.24876846	×ÔÉí³µÁ¾	Road 1	352.592034	92.29995346	-1.74E-05	0.167741328	0	0.011764706	374.8997	986.9463	647.4573	0.445	4.0638	1349	1.079470811	0.002493578	53.31775194	0.123164007
23.26540791	×ÔÉí³µÁ¾	Road 1	353.0186564	92.30116882	-1.89E-05	0.166851565	0	0.011764706	375.2591	986.9502	647.439	0.4477	4.0613	1350	1.076159827	0.002485929	53.33565865	0.123205371
23.28201731	×ÔÉí³µÁ¾	Road 1	353.4445165	92.30296783	-2.02E-05	0.166831598	0	0.011764706	375.7982	986.9561	647.4114	0.4516	4.0574	1351	1.104310151	0.002550956	53.35400057	0.123247741
23.2987286	×ÔÉí³µÁ¾	Road 1	353.872992	92.30353775	-2.10E-05	0.165533483	0	0.011764706	375.9779	986.958	647.4022	0.4529	4.0561	1352	1.045120269	0.002414228	53.37146588	0.123288086
23.31535302	×ÔÉí³µÁ¾	Road 1	354.2992495	92.30559082	-2.15E-05	0.165523484	0	0.011764706	376.6197	986.9658	647.3694	0.4568	4.0523	1353	1.116445349	0.002578989	53.39002614	0.12333096
23.33210207	×ÔÉí³µÁ¾	Road 1	354.7287082	92.30680618	-2.17E-05	0.164795026	0	0.011764706	376.9791	986.9697	647.351	0.4594	4.0497	1354	1.075825962	0.002485158	53.4080452	0.123372584
23.34876022	×ÔÉí³µÁ¾	Road 1	355.1558411	92.30791855	-2.17E-05	0.165183842	0	0.011764706	377.3385	986.9736	647.3326	0.462	4.0471	1355	1.071218962	0.002474516	53.42588972	0.123413805
23.36535385	×ÔÉí³µÁ¾	Road 1	355.5813251	92.30905838	-2.17E-05	0.16388616	0	0.011764706	377.7236	986.9785	647.3129	0.4642	4.045	1356	1.072755982	0.002478066	53.44369064	0.123454925
23.38202079	×ÔÉí³µÁ¾	Road 1	356.0086949	92.31035614	-2.17E-05	0.164275631	0	0.011764706	378.1601	986.9834	647.2906	0.4672	4.042	1357	1.080084777	0.002494996	53.46169235	0.123496509
23.39871962	×ÔÉí³µÁ¾	Road 1	356.436888	92.3115509	-2.17E-05	0.163875327	0	0.011764706	378.5709	986.9883	647.2695	0.4698	4.0395	1358	1.075055842	0.002483379	53.47964453	0.123537979
23.41535394	×ÔÉí³µÁ¾	Road 1	356.8634322	92.3127182	-2.17E-05	0.164055929	0	0.011764706	379.0073	986.9932	647.2472	0.4729	4.0365	1359	1.073969796	0.00248087	53.49750928	0.123579246
23.43279321	×ÔÉí³µÁ¾	Road 1	357.3106257	92.31442795	-2.17E-05	0.163136214	0	0.011764706	379.6235	987	647.2157	0.4772	4.0321	1360	1.09621467	0.002532256	53.51662647	0.123623407
23.4489741	×ÔÉí³µÁ¾	Road 1	357.7255551	92.31544418	-2.17E-05	0.163196132	0	0.011764706	379.9829	987.0039	647.1973	0.4799	4.0295	1361	1.068113534	0.002467342	53.5339095	0.123663331
23.46542404	×ÔÉí³µÁ¾	Road 1	358.1473906	92.31689987	-2.17E-05	0.162687138	0	0.011764706	380.5221	987.0098	647.1698	0.4838	4.0255	1362	1.088618743	0.002514709	53.55181721	0.123704698
23.48208768	×ÔÉí³µÁ¾	Road 1	358.5747073	92.31716766	-2.17E-05	0.125842646	0	0.019607844	380.8816	987.0137	647.1514	0.4864	4.0229	1363	1.030843421	0.002381248	53.56899482	0.123744378
23.49873666	×ÔÉí³µÁ¾	Road 1	359.0016348	92.31431122	-2.17E-05	0.041507617	0	0.027450981	381.241	987.0176	647.1329	0.4891	4.0203	1364	1.018000198	0.00235158	53.58594348	0.123783529
23.51545712	×ÔÉí³µÁ¾	Road 1	359.4303396	92.30231552	-2.17E-05	-0.036614396	0	0.027450981	381.7802	987.0244	647.1053	0.492	4.0173	1365	1.017906898	0.002351365	53.60296335	0.123822845
23.53201043	×ÔÉí³µÁ¾	Road 1	359.8547198	92.29386978	-2.17E-05	-0.016569301	0	0.035294119	382.1396	987.0283	647.087	0.4947	4.0147	1366	1.017841209	0.002351213	53.61981199	0.123861766
23.54877048	×ÔÉí³µÁ¾	Road 1	360.2843607	92.28536224	-2.15E-05	-0.052324876	0	0.043137256	382.4989	987.0322	647.0686	0.4973	4.0121	1367	1.01777504	0.00235106	53.63686995	0.12390117
23.56541616	×ÔÉí³µÁ¾	Road 1	360.7110128	92.27303696	-2.15E-05	-0.138398662	0	0.043137256	382.8582	987.0361	647.0503	0.4999	4.0095	1368	1.017679176	0.002350839	53.65380991	0.123940301
23.58213332	×ÔÉí³µÁ¾	Road 1	361.1393806	92.24796753	-2.15E-05	-0.16471523	0	0.043137256	383.2944	987.041	647.028	0.503	4.0064	1369	1.017484192	0.002350388	53.67081936	0.123979593
23.59874051	×ÔÉí³µÁ¾	Road 1	361.5648657	92.23392563	-2.13E-05	-0.09247499	0	0.043137256	383.8332	987.0469	647.0004	0.5069	4.0025	1370	1.017374977	0.002350136	53.6877151	0.124018622
23.6153785	×ÔÉí³µÁ¾	Road 1	361.9910613	92.21693802	-2.10E-05	-0.089279033	0	0.043137256	384.3719	987.0537	646.9729	0.5098	3.9996	1371	1.017242851	0.002349831	53.70463997	0.124057718
23.63212205	×ÔÉí³µÁ¾	Road 1	362.4199025	92.20435867	-2.10E-05	-0.120840468	0	0.043137256	384.7309	987.0576	646.9545	0.5125	3.9969	1372	1.017145012	0.002349605	53.72167059	0.124097059
23.64873401	×ÔÉí³µÁ¾	Road 1	362.8453076	92.19011078	-2.07E-05	-0.156525448	0	0.050980393	385.0899	987.0615	646.9362	0.5151	3.9943	1373	1.017034195	0.002349349	53.73856552	0.124136086
23.66534267	×ÔÉí³µÁ¾	Road 1	363.2705475	92.17262878	-2.05E-05	-0.206123784	0	0.050980393	385.4745	987.0664	646.9165	0.5172	3.9922	1374	1.016898224	0.002349035	53.75545484	0.124175101
23.68208035	×ÔÉí³µÁ¾	Road 1	363.6989559	92.14357681	-2.05E-05	-0.192910582	0	0.050980393	386.064	987.0723	646.8863	0.522	3.9874	1375	1.016672264	0.002348513	53.77247158	0.124214409
23.69879971	×ÔÉí³µÁ¾	Road 1	364.1268154	92.12639008	-2.05E-05	-0.163267195	0	0.050980393	386.4483	987.0771	646.8667	0.5241	3.9853	1376	1.016538589	0.002348204	53.78946745	0.12425367
23.71542523	×ÔÉí³µÁ¾	Road 1	364.5522024	92.11097488	-2.05E-05	-0.162538618	0	0.050980393	386.807	987.0811	646.8483	0.5267	3.9827	1377	1.016418694	0.002347927	53.80636594	0.124292705
23.73209767	×ÔÉí³µÁ¾	Road 1	364.9787163	92.09509964	-2.05E-05	-0.181305036	0	0.050980393	387.1656	987.085	646.83	0.5293	3.9801	1378	1.016295219	0.002347642	53.82331006	0.124331846
23.74881117	×ÔÉí³µÁ¾	Road 1	365.406155	92.06808014	-2.05E-05	-0.227437273	0	0.05882353	387.729	987.0918	646.8011	0.5327	3.9767	1379	1.016085068	0.002347157	53.8402924	0.124371075
23.76547554	×ÔÉí³µÁ¾	Road 1	365.8322438	92.0478447	-2.05E-05	-0.276915789	0	0.05882353	388.0875	987.0957	646.7828	0.5353	3.974	1380	1.015927681	0.002346793	53.8572222	0.124410183
23.78204461	×ÔÉí³µÁ¾	Road 1	366.2557487	92.01588135	-2.05E-05	-0.266169786	0	0.05882353	388.625	987.1016	646.7553	0.5392	3.9701	1381	1.015679077	0.002346219	53.87405106	0.124449058
23.79876361	×ÔÉí³µÁ¾	Road 1	366.6829925	91.99583817	-2.05E-05	-0.256430954	0	0.06666667	388.9832	987.1055	646.737	0.5418	3.9676	1382	1.015523186	0.002345859	53.89102958	0.124488278
23.81538913	×ÔÉí³µÁ¾	Road 1	367.1077393	91.97236176	-2.05E-05	-0.343233973	0	0.074509807	389.367	987.1104	646.7174	0.5439	3.9655	1383	1.015340591	0.002345437	53.90791015	0.124527272
23.83214441	×ÔÉí³µÁ¾	Road 1	367.5356729	91.94479294	-2.05E-05	-0.444208324	0	0.074509807	389.7251	987.1143	646.699	0.5465	3.9629	1384	1.015126167	0.002344941	53.92491887	0.124566563
23.84871568	×ÔÉí³µÁ¾	Road 1	367.9586923	91.89820404	-2.05E-05	-0.41443491	0	0.074509807	390.2875	987.1201	646.6703	0.5509	3.9586	1385	1.014763809	0.002344104	53.9417348	0.124605407
23.86541854	×ÔÉí³µÁ¾	Road 1	368.3849493	91.87198105	-2.05E-05	-0.350973308	0	0.074509807	390.6453	987.124	646.652	0.5535	3.956	1386	1.014559853	0.002343633	53.95868085	0.124644553
23.88203783	×ÔÉí³µÁ¾	Road 1	368.8089607	91.84753647	-2.05E-05	-0.344870895	0	0.074509807	391.0029	987.1289	646.6337	0.5551	3.9544	1387	1.014369728	0.002343194	53.97553896	0.124683495
23.89875279	×ÔÉí³µÁ¾	Road 1	369.2352855	91.82010498	-2.05E-05	-0.385681093	0	0.074509807	391.386	987.1328	646.6141	0.5582	3.9514	1388	1.014156372	0.002342701	53.99249054	0.124722653
23.91537025	×ÔÉí³µÁ¾	Road 1	369.6589686	91.78655548	-2.05E-05	-0.410989165	0	0.074509807	391.8201	987.1377	646.5919	0.5612	3.9484	1389	1.013895432	0.002342098	54.0093389	0.124761573
23.93203279	×ÔÉí³µÁ¾	Road 1	370.0836483	91.75352097	-2.05E-05	-0.388437152	0	0.074509807	392.254	987.1426	646.5697	0.5642	3.9454	1390	1.013638496	0.002341505	54.0262287	0.124800588
23.94875362	×ÔÉí³µÁ¾	Road 1	370.5096485	91.71800766	-2.05E-05	-0.368981332	0	0.074509807	392.6622	987.1475	646.5488	0.5667	3.9429	1391	1.013362282	0.002340867	54.04317295	0.12483973
23.96533149	×ÔÉí³µÁ¾	Road 1	370.9318518	91.6843895	-2.05E-05	-0.38204512	0	0.074509807	393.1978	987.1533	646.5214	0.5705	3.9391	1392	1.013100807	0.002340263	54.059968	0.124878526
23.98210619	×ÔÉí³µÁ¾	Road 1	371.3588809	91.64420013	-2.09E-05	-0.391294181	0	0.074509807	393.7332	987.1592	646.494	0.5744	3.9353	1393	1.012788223	0.002339541	54.07695723	0.124917771
23.99873941	×ÔÉí³µÁ¾	Road 1	371.7822378	91.62898407	-2.10E-05	-0.388008237	0	0.074509807	393.9371	987.1621	646.4836	0.5752	3.9345	1394	1.012669876	0.002339267	54.09380119	0.124956681
24.0153708	×ÔÉí³µÁ¾	Road 1	372.2053385	91.58362427	-2.13E-05	-0.379679114	0	0.074509807	394.5485	987.1689	646.4524	0.5794	3.9303	1395	1.012317078	0.002338452	54.11063743	0.124995572
24.03209859	×ÔÉí³µÁ¾	Road 1	372.6308312	91.57058487	-2.17E-05	-0.379748553	0	0.074509807	394.7268	987.1709	646.4432	0.5807	3.929	1396	1.01221566	0.002338218	54.12756956	0.125034686
24.04878752	×ÔÉí³µÁ¾	Road 1	373.0550988	91.51953964	-2.23E-05	-0.38497144	0	0.074509807	395.4142	987.1787	646.4081	0.5853	3.9244	1397	1.011818642	0.002337301	54.14445573	0.125073693
24.06538592	×ÔÉí³µÁ¾	Road 1	373.4769423	91.49297333	-2.31E-05	-0.384013146	0	0.074509807	395.7705	987.1826	646.3899	0.5879	3.9218	1398	1.011612015	0.002336824	54.16124687	0.12511248
24.08200264	×ÔÉí³µÁ¾	Road 1	373.8991196	91.46437454	-2.44E-05	-0.381885856	0	0.074509807	396.1522	987.1865	646.3703	0.5909	3.9188	1399	1.01138958	0.00233631	54.17805285	0.125151302
24.0987154	×ÔÉí³µÁ¾	Road 1	374.3236148	91.43807602	-2.59E-05	-0.381755561	0	0.074509807	396.5083	987.1904	646.3521	0.5934	3.9163	1400	1.011185036	0.002335837	54.19495254	0.12519034
24.1175168	×ÔÉí³µÁ¾	Road 1	374.8009434	91.3965477	-2.80E-05	-0.382743806	0	0.074509807	397.0676	987.1973	646.3235	0.5968	3.913	1401	1.010862038	0.002335091	54.21395816	0.125234243
24.13266767	×ÔÉí³µÁ¾	Road 1	375.1854812	91.37009811	-3.06E-05	-0.382085055	0	0.074509807	397.4234	987.2012	646.3053	0.5993	3.9104	1402	1.010656319	0.002334616	54.22927048	0.125269615
24.14880384	×ÔÉí³µÁ¾	Road 1	375.5948425	91.32904358	-3.48E-05	-0.436977327	0	0.082352944	397.957	987.207	646.278	0.6031	3.9066	1403	1.010337006	0.002333878	54.24557345	0.125307275
24.16542642	×ÔÉí³µÁ¾	Road 1	376.0164016	91.29822693	-3.79E-05	-0.486395925	0	0.082352944	398.3125	987.2109	646.2598	0.6057	3.9041	1404	1.010097321	0.002333325	54.26236388	0.125346061
24.18201895	×ÔÉí³µÁ¾	Road 1	376.4370526	91.26657944	-4.24E-05	-0.480992049	0	0.082352944	398.6679	987.2148	646.2416	0.6082	3.9012	1405	1.009851173	0.002332756	54.27911987	0.125384767
24.19884645	×ÔÉí³µÁ¾	Road 1	376.8634504	91.22165909	-4.80E-05	-0.429635465	0	0.082352944	399.2008	987.2207	646.2144	0.612	3.8973	1406	1.009501793	0.002331949	54.29610725	0.125424008
24.2153697	×ÔÉí³µÁ¾	Road 1	377.2820043	91.19234619	-5.47E-05	-0.464563012	0	0.090196081	399.556	987.2256	646.1962	0.6135	3.8956	1407	1.009273804	0.002331422	54.31278374	0.12546253
24.23201391	×ÔÉí³µÁ¾	Road 1	377.7033884	91.14175415	-6.28E-05	-0.568863273	0	0.090196081	400.0884	987.2314	646.169	0.6173	3.8916	1408	1.00888031	0.002330514	54.32957576	0.12550132
24.24872154	×ÔÉí³µÁ¾	Road 1	378.1262002	91.1034256	-7.08E-05	-0.550205767	0	0.090196081	400.4686	987.2354	646.1495	0.6203	3.8886	1409	1.008582199	0.002329825	54.34642677	0.125540246
24.26605122	×ÔÉí³µÁ¾	Road 1	378.5646036	91.07223129	-7.91E-05	-0.503064692	0	0.090196081	400.7979	987.2393	646.1327	0.6224	3.8865	1410	1.008339577	0.002329264	54.36390097	0.125580611
24.28201511	×ÔÉí³µÁ¾	Road 1	378.9682411	91.02388458	-8.75E-05	-0.528103411	0	0.098039217	401.3297	987.2451	646.1055	0.6262	3.8827	1411	1.007963547	0.002328396	54.37999199	0.125617781
24.29880374	×ÔÉí³µÁ¾	Road 1	379.3925631	90.9876915	-9.74E-05	-0.618649781	0	0.098039217	401.684	987.249	646.0873	0.6287	3.8802	1412	1.007682045	0.002327746	54.3969096	0.125656861
24.31539408	×ÔÉí³µÁ¾	Road 1	379.8116012	90.92868805	-0.000105537	-0.642580807	0	0.098039217	402.2153	987.2549	646.0602	0.6325	3.8765	1413	1.007223129	0.002326685	54.41361976	0.125695462
24.33205479	×ÔÉí³µÁ¾	Road 1	380.2322457	90.89169159	-0.000114359	-0.569641948	0	0.098039217	402.5692	987.2588	646.0421	0.635	3.874	1414	1.006935379	0.002326021	54.43039602	0.125734215
24.34874739	×ÔÉí³µÁ¾	Road 1	380.6535304	90.85611649	-0.000120729	-0.573277414	0	0.105882354	402.9231	987.2637	646.024	0.6365	3.8725	1415	1.006658684	0.002325382	54.44719977	0.125773031
24.36537181	×ÔÉí³µÁ¾	Road 1	381.0728218	90.79710617	-0.000125947	-0.695066333	0	0.105882354	403.4536	987.2695	645.9968	0.6401	3.8687	1416	1.006199715	0.002324321	54.46392726	0.125811672
24.3821018	×ÔÉí³µÁ¾	Road 1	381.4945772	90.75435562	-0.000129429	-0.702376068	0	0.105882354	403.807	987.2734	645.9788	0.6425	3.8662	1417	1.00586721	0.002323553	54.48075541	0.125850545
24.39878047	×ÔÉí³µÁ¾	Road 1	381.9148464	90.71281357	-0.000132023	-0.676169872	0	0.113725491	404.1603	987.2773	645.9607	0.645	3.8637	1418	1.005544106	0.002322807	54.49752655	0.125889286
24.41532461	×ÔÉí³µÁ¾	Road 1	382.3315314	90.67049561	-0.000132498	-0.728894234	0	0.121568628	404.5134	987.2813	645.9426	0.6474	3.8612	1419	1.005214966	0.002322047	54.51415697	0.125927703
24.43199485	×ÔÉí³µÁ¾	Road 1	382.7510116	90.58829727	-0.000132498	-0.856325865	0	0.121568628	405.1183	987.2881	645.9117	0.6515	3.8571	1420	1.004575645	0.00232057	54.53090349	0.125966387
24.44880035	×ÔÉí³µÁ¾	Road 1	383.1736643	90.53880386	-0.000132498	-0.81662488	0	0.121568628	405.471	987.292	645.8937	0.654	3.8547	1421	1.004190697	0.002319681	54.54777941	0.12600537
24.46540755	×ÔÉí³µÁ¾	Road 1	383.5911132	90.49185791	-0.000132498	-0.78198725	0	0.129411772	405.8234	987.2959	645.8756	0.6565	3.8522	1422	1.003825562	0.002318837	54.56445014	0.12604388
24.48198651	×ÔÉí³µÁ¾	Road 1	384.0074773	90.41038742	-0.000132498	-0.927916765	0	0.137254909	406.402	987.3027	645.8461	0.6601	3.8486	1423	1.003191902	0.002317373	54.58108203	0.126082299
24.49870917	×ÔÉí³µÁ¾	Road 1	384.4273218	90.3827774	-0.000132498	-0.979003251	0	0.137254909	406.578	987.3047	645.837	0.6614	3.8473	1424	1.002977158	0.002316877	54.59785447	0.126121044
24.51539334	×ÔÉí³µÁ¾	Road 1	384.8457293	90.2812088	-0.000132498	-0.944724381	0	0.137254909	407.2061	987.3115	645.8049	0.6659	3.8428	1425	1.00218718	0.002315052	54.61457513	0.126159669
24.532127	×ÔÉí³µÁ¾	Road 1	385.2651295	90.22778091	-0.000132498	-0.919317245	0	0.145098045	407.5575	987.3154	645.7869	0.6683	3.8403	1426	1.001771629	0.002314092	54.63133843	0.126198392
24.54921694	×ÔÉí³µÁ¾	Road 1	385.6930549	90.14255447	-0.000132498	-1.072057486	0	0.152941182	408.0842	987.3213	645.76	0.672	3.8366	1427	1.001108757	0.002312561	54.64844733	0.126237913
24.58213772	×ÔÉí³µÁ¾	Road 1	386.5166281	90.060569	-0.000132498	-1.13836503	0	0.152941182	408.5353	987.3262	645.7369	0.6753	3.8333	1428	1.000471092	0.002311088	54.68138361	0.126313996
24.59866427	×ÔÉí³µÁ¾	Road 1	386.9294701	89.92989349	-0.000132498	-1.012121797	0	0.152941182	409.2861	987.335	645.6985	0.6801	3.8284	1429	0.999454727	0.00230874	54.69790115	0.126352152
24.61537813	×ÔÉí³µÁ¾	Road 1	387.3467162	89.87068405	-0.000132498	-1.077660441	0	0.168627456	409.6362	987.3389	645.6806	0.6825	3.826	1430	0.998994209	0.002307677	54.7145982	0.126390722
24.63206743	×ÔÉí³µÁ¾	Road 1	387.762878	89.76903992	-0.000132498	-1.294770479	0	0.168627456	410.1608	987.3447	645.6537	0.6862	3.8223	1431	0.998203644	0.00230585	54.73125752	0.126429205
24.64874427	×ÔÉí³µÁ¾	Road 1	388.1783919	89.69624863	-0.000132498	-1.293900013	0	0.176470593	410.5102	987.3486	645.6359	0.6886	3.8199	1432	0.997637489	0.002304543	54.74789496	0.126467637
24.66534047	×ÔÉí³µÁ¾	Road 1	388.5915452	89.62005844	-0.000132498	-1.254480481	0	0.176470593	410.8842	987.3535	645.6168	0.6905	3.818	1433	0.997044899	0.002303174	54.76444211	0.126505861
24.68211298	×ÔÉí³µÁ¾	Road 1	389.0086	89.51535187	-0.000132498	-1.247409344	0	0.176470593	411.4073	987.3594	645.59	0.6941	3.8143	1434	0.996230515	0.002301292	54.7811514	0.12654446
24.69878762	×ÔÉí³µÁ¾	Road 1	389.4228927	89.44444885	-0.000132498	-1.288779616	0	0.184313729	411.7557	987.3633	645.5723	0.6965	3.8119	1435	0.995679047	0.002300019	54.79775399	0.126582812
24.71532553	×ÔÉí³µÁ¾	Road 1	389.8334459	89.36987915	-0.000132498	-1.403563499	0	0.200000003	412.1038	987.3672	645.5543	0.6989	3.8095	1436	0.99509906	0.002298679	54.81421085	0.126620827
24.73200383	×ÔÉí³µÁ¾	Road 1	390.2468993	89.24362564	-0.000132498	-1.625059843	0	0.20784314	412.6254	987.373	645.5277	0.7025	3.8059	1437	0.994117088	0.00229641	54.83079104	0.126659127
24.74878441	×ÔÉí³µÁ¾	Road 1	390.6624685	89.15361328	-0.000132498	-1.646744967	0	0.215686277	412.9727	987.377	645.51	0.7049	3.8035	1438	0.993416992	0.002294793	54.84746115	0.126697635
24.76541909	×ÔÉí³µÁ¾	Road 1	391.0740127	89.06445923	-0.000132498	-1.613012791	0	0.215686277	413.3197	987.3809	645.4922	0.7073	3.8011	1439	0.992723572	0.002293191	54.86397479	0.126735782
24.78204865	×ÔÉí³µÁ¾	Road 1	391.4847905	88.92603836	-0.000132498	-1.635456681	0	0.223529413	413.8642	987.3867	645.4644	0.7114	3.797	1440	0.991646965	0.002290704	54.88046544	0.126773875
24.79874418	×ÔÉí³µÁ¾	Road 1	391.8967736	88.83449478	-0.000132498	-1.721489787	0	0.23137255	414.2102	987.3906	645.4467	0.7138	3.7947	1441	0.990934959	0.00228906	54.89700962	0.126812092
24.81532681	×ÔÉí³µÁ¾	Road 1	392.3053625	88.70242538	-0.000132498	-1.814971209	0	0.239215687	414.5559	987.3945	645.429	0.7161	3.7923	1442	0.989907753	0.002286687	54.9134249	0.126850012
24.8320689	×ÔÉí³µÁ¾	Road 1	392.7173444	88.58722687	-0.000132498	-1.85902667	0	0.239215687	415.0738	987.4004	645.4025	0.7197	3.7887	1443	0.989011765	0.002284617	54.92998302	0.126888261
24.84867609	×ÔÉí³µÁ¾	Road 1	393.125549	88.48795853	-0.000132498	-1.810082078	0	0.239215687	415.4185	987.4043	645.3849	0.722	3.7864	1444	0.988239677	0.002282834	54.94639491	0.126926172
24.86536026	×ÔÉí³µÁ¾	Road 1	393.5351948	88.39066086	-0.000132498	-1.772910476	0	0.239215687	415.7628	987.4082	645.3673	0.7244	3.784	1445	0.987482918	0.002281086	54.96287024	0.12696423
24.88205653	×ÔÉí³µÁ¾	Road 1	393.9443685	88.22483597	-0.000132498	-1.799492717	0	0.239215687	416.3523	987.415	645.3372	0.7283	3.7802	1446	0.986193169	0.002278106	54.97933598	0.127002266
24.89867911	×ÔÉí³µÁ¾	Road 1	394.351283	88.1265976	-0.000132498	-1.815814972	0	0.239215687	416.6956	987.4189	645.3196	0.7306	3.7778	1447	0.985429092	0.002276341	54.99571637	0.127040105
24.91532663	×ÔÉí³µÁ¾	Road 1	394.7583522	88.02811203	-0.000132498	-1.811287999	0	0.239215687	417.0385	987.4229	645.302	0.7329	3.7755	1448	0.984663094	0.002274572	55.01210856	0.127077971
24.9320009	×ÔÉí³µÁ¾	Road 1	395.1653952	87.88118362	-0.000132498	-1.797118068	0	0.239215687	417.5522	987.4287	645.2758	0.7364	3.7721	1449	0.983520317	0.002271932	55.02850804	0.127115854
24.94865905	×ÔÉí³µÁ¾	Road 1	395.5715936	87.78373489	-0.000132498	-1.796903849	0	0.239215687	417.8942	987.4326	645.2582	0.7387	3.7698	1450	0.982762383	0.002270181	55.04487904	0.127153671
24.96533039	×ÔÉí³µÁ¾	Road 1	395.9775003	87.65126724	-0.000132498	-1.798823595	0	0.239215687	418.2358	987.4365	645.2407	0.741	3.7675	1451	0.981732079	0.002267801	55.06124583	0.127191478
24.98197607	×ÔÉí³µÁ¾	Road 1	396.3822691	87.5402916	-0.000132498	-1.761022687	0	0.23137255	418.7475	987.4424	645.2146	0.7444	3.7641	1452	0.980868935	0.002265807	55.07757306	0.127229194
24.99868296	×ÔÉí³µÁ¾	Road 1	396.7880936	87.44700394	-0.000132498	-1.653692126	0	0.215686277	419.0881	987.4453	645.1971	0.7477	3.7609	1453	0.980143364	0.002264131	55.09394822	0.12726702
25.01612627	×ÔÉí³µÁ¾	Road 1	397.2111936	87.32060623	-0.000132498	-1.439229012	0	0.20784314	419.5985	987.4512	645.171	0.7511	3.7576	1454	0.979160271	0.00226186	55.11102801	0.127306475
25.03196919	×ÔÉí³µÁ¾	Road 1	397.5951334	87.24293976	-0.000132498	-1.363225341	0	0.184313729	419.9383	987.4551	645.1537	0.7534	3.7553	1455	0.978556198	0.002260465	55.1265312	0.127342287
25.04867939	×ÔÉí³µÁ¾	Road 1	397.9997567	87.17097244	-0.000132498	-1.215558887	0	0.168627456	420.2779	987.459	645.1364	0.7556	3.7531	1456	0.977996452	0.002259172	55.14287371	0.127380038
25.06536906	×ÔÉí³µÁ¾	Road 1	398.403459	87.07952499	-0.000132498	-0.94972837	0	0.152941182	420.7867	987.4648	645.1102	0.759	3.7498	1457	0.977285194	0.002257529	55.15918428	0.127417716
25.08320971	×ÔÉí³µÁ¾	Road 1	398.8347432	87.02725067	-0.000132498	-0.857683957	0	0.129411772	421.1257	987.4688	645.093	0.7613	3.7475	1458	0.976878616	0.00225659	55.17661243	0.127457975
25.09895623	×ÔÉí³µÁ¾	Road 1	399.2151972	86.98011932	-0.000132498	-0.730081439	0	0.113725491	421.4644	987.4727	645.0756	0.7635	3.7453	1459	0.976512039	0.002255743	55.1919891	0.127493495
25.11536145	×ÔÉí³µÁ¾	Road 1	399.6112928	86.92014771	-0.000133213	-0.525677085	0	0.098039217	421.9964	987.4785	645.0485	0.7673	3.7416	1460	0.976045593	0.002254665	55.20800134	0.127530483
25.13209254	×ÔÉí³µÁ¾	Road 1	400.0151097	86.88859634	-0.000133213	-0.477736652	0	0.098039217	422.3348	987.4824	645.0311	0.7695	3.7394	1461	0.975800194	0.002254098	55.22432754	0.127568197
25.14874592	×ÔÉí³µÁ¾	Road 1	400.4168902	86.85384521	-0.000134171	-0.535814285	0	0.098039217	422.6731	987.4863	645.0138	0.7718	3.7372	1462	0.975529907	0.002253474	55.24057341	0.127605725
25.16538207	×ÔÉí³µÁ¾	Road 1	400.8180033	86.79934616	-0.000136342	-0.573986769	0	0.090196081	423.2043	987.4922	644.9866	0.7756	3.7334	1463	0.975106026	0.002252495	55.25679542	0.127643197
25.18201712	×ÔÉí³µÁ¾	Road 1	401.218936	86.76605759	-0.000139027	-0.479094416	0	0.090196081	423.5422	987.4961	644.9694	0.7778	3.7312	1464	0.974847115	0.002251897	55.27301205	0.127680658
25.19875004	×ÔÉí³µÁ¾	Road 1	401.6220312	86.72380829	-0.000142996	-0.403917849	0	0.082352944	424.0489	987.502	644.9434	0.7812	3.7279	1465	0.974518509	0.002251138	55.28931859	0.127718326
25.2153576	×ÔÉí³µÁ¾	Road 1	402.0220379	86.70896301	-0.000147805	-0.377880752	0	0.082352944	424.2418	987.5039	644.9336	0.7827	3.7264	1466	0.974403046	0.002250871	55.30550105	0.127755707
25.23203408	×ÔÉí³µÁ¾	Road 1	402.4234857	86.66172867	-0.000153245	-0.442539692	0	0.082352944	424.8204	987.5107	644.9039	0.7864	3.7228	1467	0.974035667	0.002250022	55.32174453	0.12779323
25.24868562	×ÔÉí³µÁ¾	Road 1	402.8241978	86.63240891	-0.000160164	-0.428427786	0	0.074509807	425.1578	987.5146	644.8867	0.7886	3.7206	1468	0.973807625	0.002249496	55.33795993	0.127830687
25.26542148	×ÔÉí³µÁ¾	Road 1	403.2267624	86.59447174	-0.000167844	-0.34329316	0	0.074509807	425.6637	987.5195	644.8608	0.7929	3.7163	1469	0.973512558	0.002248814	55.3542525	0.127868323
25.28202537	×ÔÉí³µÁ¾	Road 1	403.6261016	86.58338928	-0.000175765	-0.298740745	0	0.074509807	425.8322	987.5215	644.8522	0.794	3.7152	1470	0.973426361	0.002248615	55.37041516	0.127905659
25.29873227	×ÔÉí³µÁ¾	Road 1	404.0277228	86.54127731	-0.000184822	-0.37246871	0	0.074509807	426.4341	987.5283	644.8214	0.7981	3.7112	1471	0.973098824	0.002247858	55.38667262	0.127943214
25.31534276	×ÔÉí³µÁ¾	Road 1	404.4269049	86.51493073	-0.000192349	-0.39198789	0	0.074509807	426.771	987.5322	644.8042	0.8003	3.709	1472	0.972893906	0.002247385	55.40283287	0.127980544
25.33206908	×ÔÉí³µÁ¾	Road 1	404.8287489	86.48872147	-0.000199139	-0.366419673	0	0.074509807	427.1078	987.5361	644.787	0.8025	3.7068	1473	0.972690056	0.002246914	55.4191024	0.128018127
25.34867224	×ÔÉí³µÁ¾	Road 1	405.2274649	86.45208206	-0.000205448	-0.276561648	0	0.06666667	427.6369	987.542	644.7599	0.8063	3.7031	1474	0.972405083	0.002246256	55.4352474	0.128055421
25.36535495	×ÔÉí³µÁ¾	Road 1	405.628	86.43241653	-0.000210591	-0.241515294	0	0.06666667	427.9735	987.5459	644.7427	0.8085	3.7009	1475	0.972252129	0.002245902	55.45146719	0.128092889
25.38205488	×ÔÉí³µÁ¾	Road 1	406.0288597	86.41321106	-0.000214832	-0.2426835	0	0.05882353	428.31	987.5498	644.7255	0.8107	3.6987	1476	0.972102753	0.002245557	55.46770124	0.12813039
25.3986881	×ÔÉí³µÁ¾	Road 1	406.4279853	86.38450241	-0.000218797	-0.208264872	0	0.05882353	428.8386	987.5557	644.6985	0.8145	3.6949	1477	0.971879463	0.002245042	55.48386672	0.128167732
25.41536933	×ÔÉí³µÁ¾	Road 1	406.8281851	86.3676384	-0.000220129	-0.180797487	0	0.050980393	429.175	987.5596	644.6812	0.8167	3.6927	1478	0.971748299	0.002244739	55.50007669	0.128205177
25.43204507	×ÔÉí³µÁ¾	Road 1	407.2281861	86.35321884	-0.000221132	-0.10852737	0	0.043137256	429.5112	987.5635	644.664	0.8189	3.6905	1479	0.971636147	0.002244479	55.51627944	0.128242606
25.44880512	×ÔÉí³µÁ¾	Road 1	407.6301439	86.33914948	-0.000221803	-0.021417428	0	0.043137256	430.0155	987.5693	644.6382	0.8222	3.6872	1480	0.971526718	0.002244227	55.53256227	0.128280219
25.46535476	×ÔÉí³µÁ¾	Road 1	408.0270166	86.33066254	-0.000221803	-0.033730652	0	0.035294119	430.3517	987.5732	644.621	0.8244	3.685	1481	0.971460709	0.002244074	55.5486396	0.128317357
25.48197588	×ÔÉí³µÁ¾	Road 1	408.4255648	86.32230606	-0.000221803	-0.023783015	0	0.035294119	430.6878	987.5771	644.6038	0.8266	3.6828	1482	0.971395714	0.002243924	55.56478529	0.128354654
25.4987418	×ÔÉí³µÁ¾	Road 1	408.8275479	86.31436844	-0.000221803	0.004381854	0	0.027450981	431.0479	987.5811	644.5854	0.8292	3.6802	1483	0.971333977	0.002243781	55.58107059	0.128392273
25.51541534	×ÔÉí³µÁ¾	Road 1	409.227283	86.30718613	-0.000222811	0.094239868	0	0.027450981	431.6241	987.5869	644.5559	0.8338	3.6756	1484	0.971278114	0.002243652	55.59726523	0.128429683
25.53204855	×ÔÉí³µÁ¾	Road 1	409.6260409	86.30491333	-0.000222811	0.082574509	0	0.027450981	431.9601	987.5908	644.5388	0.836	3.6734	1485	0.971260437	0.002243612	55.61342042	0.128467001
25.54872209	×ÔÉí³µÁ¾	Road 1	410.0257361	86.29856873	-0.000222811	0.042144846	0	0.027450981	432.4641	987.5967	644.513	0.8393	3.6701	1486	0.97121109	0.002243498	55.62961395	0.128504408
25.56530106	×ÔÉí³µÁ¾	Road 1	410.4231509	86.29569168	-0.000222811	0.026754027	0	0.027450981	432.6321	987.5986	644.5044	0.8404	3.669	1487	0.971188713	0.002243446	55.64571525	0.128541602
25.58204168	×ÔÉí³µÁ¾	Road 1	410.8244014	86.28723221	-0.000222811	0.063018844	0	0.027450981	433.2321	987.6055	644.4737	0.8445	3.6649	1488	0.971122917	0.002243294	55.66197245	0.128579156
25.59869176	×ÔÉí³µÁ¾	Road 1	411.2234657	86.28375778	-0.000222811	0.069350868	0	0.027450981	433.5681	987.6094	644.4565	0.8467	3.6627	1489	0.971095894	0.002243232	55.67814128	0.128616506
25.61533781	×ÔÉí³µÁ¾	Road 1	411.6224166	86.28013229	-0.000222811	0.056347203	0	0.027450981	433.9041	987.6133	644.4393	0.8489	3.6605	1490	0.971067696	0.002243166	55.69430571	0.128653846
25.63199082	×ÔÉí³µÁ¾	Road 1	412.0215117	86.27522964	-0.000224159	0.044072509	0	0.027450981	434.264	987.6172	644.421	0.8515	3.6579	1491	0.971029564	0.002243078	55.71047628	0.1286912
25.64864053	×ÔÉí³µÁ¾	Road 1	412.4205034	86.26995621	-0.000224159	0.046898976	0	0.027450981	434.6479	987.6211	644.4012	0.8546	3.6548	1492	0.970988548	0.002242984	55.72664296	0.128728545
25.66531297	×ÔÉí³µÁ¾	Road 1	412.8200158	86.2647995	-0.000224497	0.057575576	0	0.027450981	435.0558	987.626	644.3804	0.8571	3.6523	1493	0.970948441	0.002242891	55.74283104	0.12876594
25.68198651	×ÔÉí³µÁ¾	Road 1	413.2195318	86.25987625	-0.000226532	0.057395902	0	0.027450981	435.4637	987.6309	644.3596	0.8596	3.6498	1494	0.970910149	0.002242802	55.75901955	0.128803335
25.69871137	×ÔÉí³µÁ¾	Road 1	413.620245	86.2529068	-0.000227896	0.049775451	0	0.027450981	436.0154	987.6367	644.3314	0.8638	3.6456	1495	0.970855942	0.002242677	55.77525698	0.128840844
25.71528411	×ÔÉí³µÁ¾	Road 1	414.0172936	86.24858093	-0.000228238	0.050225627	0	0.027450981	436.3513	987.6406	644.3141	0.866	3.6434	1496	0.970822296	0.0022426	55.79134616	0.12887801
25.73205405	×ÔÉí³µÁ¾	Road 1	414.4190473	86.24437866	-0.00023064	0.053521629	0	0.027450981	436.6871	987.6445	644.297	0.8682	3.6412	1497	0.970789612	0.002242524	55.80762625	0.128915617
25.74875655	×ÔÉí³µÁ¾	Road 1	414.8191635	86.23969574	-0.000233405	0.055549014	0	0.027450981	437.0469	987.6484	644.2786	0.8708	3.6386	1498	0.970753189	0.00224244	55.82384025	0.128953071
25.76536741	×ÔÉí³µÁ¾	Road 1	415.2170615	86.23471756	-0.000234796	0.053012166	0	0.027450981	437.4546	987.6533	644.2577	0.8733	3.6361	1499	0.97071447	0.00224235	55.83996465	0.128990318
25.78203655	×ÔÉí³µÁ¾	Road 1	415.6163215	86.22734985	-0.000237595	0.05191271	0	0.027450981	438.0302	987.6602	644.2283	0.8769	3.6325	1500	0.970657166	0.002242218	55.85614467	0.129027694
25.79876507	×ÔÉí³µÁ¾	Road 1	416.0169838	86.22305832	-0.00024077	0.052442916	0	0.027450981	438.3659	987.6641	644.2111	0.8791	3.6303	1501	0.970623787	0.002242141	55.87238178	0.129065202
25.81540416	×ÔÉí³µÁ¾	Road 1	416.4154741	86.21659698	-0.000244689	0.053701356	0	0.027450981	438.8695	987.6689	644.1854	0.8834	3.626	1502	0.970573532	0.002242025	55.88853123	0.129102507
25.83202051	×ÔÉí³µÁ¾	Road 1	416.8134006	86.21236725	-0.00024865	0.052962266	0	0.027450981	439.2052	987.6729	644.1682	0.8856	3.6238	1503	0.970540634	0.002241949	55.90465808	0.12913976
25.84867902	×ÔÉí³µÁ¾	Road 1	417.2123173	86.20819244	-0.000253386	0.052403059	0	0.027450981	439.5409	987.6768	644.1511	0.8878	3.6216	1504	0.970508163	0.002241874	55.9208253	0.129177106
25.86537309	×ÔÉí³µÁ¾	Road 1	417.6120553	86.20167618	-0.000258925	0.052722741	0	0.027450981	440.0443	987.6826	644.1253	0.8911	3.6183	1505	0.970457481	0.002241757	55.93702618	0.12921453
25.88197368	×ÔÉí³µÁ¾	Road 1	418.0095359	86.19752197	-0.00026379	0.052891511	0	0.027450981	440.38	987.6865	644.1081	0.8933	3.6161	1506	0.970425171	0.002241682	55.95313582	0.129251744
25.8987297	×ÔÉí³µÁ¾	Road 1	418.4107179	86.1932579	-0.000270244	0.052472156	0	0.027450981	440.7156	987.6904	644.0909	0.8954	3.6139	1507	0.970392006	0.002241606	55.96939572	0.129289304
25.91528887	×ÔÉí³µÁ¾	Road 1	418.8071577	86.18685837	-0.000275249	0.053341083	0	0.027450981	441.219	987.6963	644.0652	0.8987	3.6107	1508	0.970342232	0.002241491	55.98546379	0.129326421
25.93195472	×ÔÉí³µÁ¾	Road 1	419.2061315	86.18260117	-0.000281101	0.052502126	0	0.027450981	441.5546	987.7002	644.048	0.9009	3.6085	1509	0.97030912	0.002241414	56.0016348	0.129363776
25.94867261	×ÔÉí³µÁ¾	Road 1	419.6063216	86.17620163	-0.000288632	0.052542958	0	0.027450981	442.0579	987.7051	644.0223	0.9051	3.6042	1510	0.970259346	0.002241299	56.0178555	0.129401246
25.96532232	×ÔÉí³µÁ¾	Road 1	420.0048632	86.17262421	-0.000295077	0.089101836	0	0.019607844	442.3935	987.709	644.0051	0.9072	3.602	1511	0.970231522	0.002241235	56.03400957	0.129438562
25.98196654	×ÔÉí³µÁ¾	Road 1	420.4032701	86.17197189	-0.000301206	0.152449504	0	0.019607844	442.753	987.7139	643.9867	0.9088	3.6004	1512	0.970226448	0.002241223	56.05015823	0.129475866
25.99866354	×ÔÉí³µÁ¾	Road 1	420.8029542	86.17494507	-0.000308254	0.198362231	0	0.011764706	443.2563	987.7188	643.9609	0.9131	3.5961	1513	1.102857229	0.0025476	56.06857264	0.129518403
26.01537923	×ÔÉí³µÁ¾	Road 1	421.2031024	86.17849503	-0.000311608	0.210726991	0	0.011764706	443.5918	987.7227	643.9438	0.9152	3.5939	1514	1.128439023	0.002606694	56.08743528	0.129561975
26.03197506	×ÔÉí³µÁ¾	Road 1	421.6003973	86.18199692	-0.000317111	0.196844339	0	0.011764706	443.9274	987.7266	643.9266	0.9174	3.5917	1515	1.127458095	0.002604428	56.10614638	0.129605198
26.04871934	×ÔÉí³µÁ¾	Road 1	422.0012621	86.18542328	-0.000321817	0.175201327	0	0.011764706	444.4307	987.7324	643.9009	0.9206	3.5884	1516	1.122738005	0.002593525	56.12494582	0.129648625
26.06531921	×ÔÉí³µÁ¾	Road 1	422.3986784	86.18738708	-0.00032657	0.18317984	0	0.011764706	444.7663	987.7363	643.8838	0.9228	3.5863	1517	1.05846055	0.002445044	56.14251612	0.129689212
26.08202207	×ÔÉí³µÁ¾	Road 1	422.7985725	86.18992767	-0.000330493	0.19483535	0	0.011764706	445.1019	987.7402	643.8666	0.9249	3.5841	1518	1.083659996	0.002503255	56.16061635	0.129731024
26.09869231	×ÔÉí³µÁ¾	Road 1	423.1977063	86.1944252	-0.000336215	0.194670588	0	0.011764706	445.6053	987.7461	643.8408	0.9282	3.5808	1519	1.171362594	0.002705848	56.18014325	0.129776131
26.11528521	×ÔÉí³µÁ¾	Road 1	423.5950011	86.19719925	-0.000341108	0.186773822	0	0.011764706	445.9409	987.75	643.8236	0.9303	3.5786	1520	1.094957514	0.002529352	56.19831176	0.1298181
26.13196351	×ÔÉí³µÁ¾	Road 1	423.9943514	86.19947891	-0.0003465	0.184107393	0	0.011764706	446.2766	987.7539	643.8065	0.9325	3.5764	1521	1.072259826	0.00247692	56.21619524	0.129859411
26.14864915	×ÔÉí³µÁ¾	Road 1	424.3938955	86.20339966	-0.000351948	0.190529212	0	0.011764706	446.804	987.7598	643.7795	0.9361	3.5727	1522	1.1455174	0.002646145	56.23530893	0.129903564
26.16529116	×ÔÉí³µÁ¾	Road 1	424.7924082	86.20624924	-0.000356072	0.192326531	0	0.011764706	447.1397	987.7637	643.7623	0.9383	3.5705	1523	1.098054469	0.002536506	56.25358277	0.129945776
26.18197277	×ÔÉí³µÁ¾	Road 1	425.1918816	86.20898895	-0.000361619	0.190525532	0	0.011764706	447.4753	987.7676	643.7452	0.9405	3.5683	1524	1.092870662	0.002524531	56.2718136	0.129987889
26.19875224	×ÔÉí³µÁ¾	Road 1	425.5937175	86.21301956	-0.000368635	0.186760306	0	0.011764706	448.0028	987.7734	643.7182	0.9441	3.5647	1525	1.149510689	0.00265537	56.29110179	0.130032445
26.21531911	×ÔÉí³µÁ¾	Road 1	425.9904735	86.21553268	-0.000375741	0.188092023	0	0.011764706	448.3385	987.7773	643.701	0.9463	3.5625	1526	1.083587873	0.002503088	56.30905345	0.130073913
26.23193767	×ÔÉí³µÁ¾	Road 1	426.3884798	86.21823807	-0.000382937	0.189540312	0	0.011764706	448.6743	987.7813	643.6838	0.9485	3.5604	1527	1.091880728	0.002522244	56.32719893	0.13011583
26.24873694	×ÔÉí³µÁ¾	Road 1	426.7908339	86.22249527	-0.000394641	0.189661846	0	0.011764706	449.2258	987.7871	643.6556	0.9526	3.5562	1528	1.159443233	0.002678314	56.34667673	0.130160823
26.26535366	×ÔÉí³µÁ¾	Road 1	427.1888279	86.22509079	-0.000406079	0.187952608	0	0.011764706	449.5615	987.791	643.6385	0.9547	3.554	1529	1.087030525	0.002511041	56.36473961	0.130202549
26.28198285	×ÔÉí³µÁ¾	Road 1	427.5871323	86.22765198	-0.000417736	0.188441873	0	0.011764706	449.8972	987.7949	643.6213	0.9569	3.5519	1530	1.085428238	0.002507339	56.3827894	0.130244244
26.29863769	×ÔÉí³µÁ¾	Road 1	427.9860692	86.23153152	-0.00043275	0.189276844	0	0.011764706	450.4009	987.8008	643.5955	0.9601	3.5488	1531	1.144273725	0.002643272	56.4018471	0.130288267
26.3153072	×ÔÉí³µÁ¾	Road 1	428.3853693	86.23414078	-0.000447583	0.188803256	0	0.011764706	450.7367	987.8047	643.5784	0.9623	3.5467	1532	1.087358469	0.002511798	56.41997283	0.130330137
26.3320108	×ÔÉí³µÁ¾	Road 1	428.7855043	86.23805466	-0.000461656	0.189192802	0	0.011764706	451.2403	987.8105	643.5526	0.9655	3.5434	1533	1.145362662	0.002645788	56.43910451	0.130374331
26.34869534	×ÔÉí³µÁ¾	Road 1	429.1851959	86.24092484	-0.000479378	0.188097849	0	0.011764706	451.6001	987.8145	643.5342	0.9681	3.5407	1534	1.098970394	0.002538622	56.45744032	0.130416687
26.36530033	×ÔÉí³µÁ¾	Road 1	429.5829934	86.24340363	-0.000494679	0.188770458	0	0.011764706	451.9359	987.8184	643.5171	0.9702	3.5385	1535	1.082040667	0.002499514	56.4754076	0.130458192
26.38198743	×ÔÉí³µÁ¾	Road 1	429.98277	86.24599228	-0.000507385	0.189160094	0	0.011764706	452.2717	987.8223	643.4999	0.9724	3.5363	1536	1.086423618	0.002509639	56.49353686	0.13050007
26.39868736	×ÔÉí³µÁ¾	Road 1	430.3828674	86.24888992	-0.000521492	0.188507333	0	0.011764706	452.6315	987.8262	643.4814	0.975	3.5337	1537	1.100151812	0.002541351	56.51190932	0.130542511
26.41534514	×ÔÉí³µÁ¾	Road 1	430.7819688	86.25191116	-0.00053104	0.18832615	0	0.011764706	453.0393	987.8311	643.4606	0.9775	3.5312	1538	1.106037504	0.002554947	56.53033345	0.13058507
26.43194207	×ÔÉí³µÁ¾	Road 1	431.1796338	86.25654602	-0.000538883	0.188707262	0	0.011764706	453.6391	987.8379	643.4299	0.9816	3.5271	1539	1.179046522	0.002723597	56.549902	0.130630274
26.44866033	×ÔÉí³µÁ¾	Road 1	431.5802118	86.25783691	-0.00054558	0.188258052	0	0.011764706	453.807	987.8398	643.4214	0.9827	3.526	1540	1.028452554	0.002375725	56.56709594	0.130669992
26.46531737	×ÔÉí³µÁ¾	Road 1	431.9793444	86.26245117	-0.000550485	0.189087167	0	0.011764706	454.4068	987.8467	643.3907	0.9874	3.5219	1541	1.177433529	0.002719871	56.5867085	0.130715297
26.48195133	×ÔÉí³µÁ¾	Road 1	432.3779356	86.26502609	-0.0005511	0.188228205	0	0.011764706	454.7426	987.8506	643.3735	0.9895	3.5197	1542	1.086351241	0.002509471	56.60477881	0.130757039
26.49864503	×ÔÉí³µÁ¾	Road 1	432.77797	86.26749115	-0.0005511	0.189296931	0	0.011764706	455.0786	987.8545	643.3563	0.9917	3.5175	1543	1.081054441	0.002497236	56.62282561	0.130798727
26.51535595	×ÔÉí³µÁ¾	Road 1	433.1784301	86.27027893	-0.0005511	0.188882425	0	0.011764706	455.4384	987.8584	643.3379	0.9942	3.5149	1544	1.095363811	0.00253029	56.64113016	0.130841011
26.53191843	×ÔÉí³µÁ¾	Road 1	433.5753539	86.27490005	-0.0005511	0.189272299	0	0.011764706	456.0383	987.8662	643.3073	0.9972	3.5118	1545	1.179048545	0.002723602	56.66065812	0.13088612
26.54867664	×ÔÉí³µÁ¾	Road 1	433.9769752	86.27630081	-0.0005511	0.188613266	0	0.011764706	456.2063	987.8682	643.2986	0.9983	3.5107	1546	1.033359127	0.00238706	56.67797537	0.130926123
26.56531426	×ÔÉí³µÁ¾	Road 1	434.3757216	86.27959671	-0.0005511	0.189012602	0	0.011764706	456.6382	987.873	643.2765	1.0012	3.5077	1547	1.118768643	0.002584356	56.69658901	0.130969121
26.58199623	×ÔÉí³µÁ¾	Road 1	434.7755515	86.28403244	-0.0005511	0.188143969	0	0.011764706	457.2141	987.8799	643.2471	1.0048	3.5041	1548	1.169364853	0.002701233	56.71609632	0.131014183
26.59861845	×ÔÉí³µÁ¾	Road 1	435.1739612	86.28660049	-0.0005511	0.188813344	0	0.011764706	457.5501	987.8838	643.2299	1.0069	3.5019	1549	1.086321334	0.002509402	56.7341534	0.131055894
26.61525533	×ÔÉí³µÁ¾	Road 1	435.5727343	86.28918915	-0.0005511	0.188564077	0	0.011764706	457.8861	987.8877	643.2128	1.01	3.4997	1550	1.087166681	0.002511355	56.75224046	0.131097675
26.63193584	×ÔÉí³µÁ¾	Road 1	435.9725657	86.29192886	-0.0005511	0.188953519	0	0.011764706	458.2461	987.8916	643.1943	1.0126	3.497	1551	1.093641543	0.002526312	56.77048296	0.131139816
26.64861744	×ÔÉí³µÁ¾	Road 1	436.3724366	86.29478531	-0.0005511	0.188334376	0	0.011764706	458.6301	987.8955	643.1747	1.0156	3.494	1552	1.098878017	0.002538408	56.788814	0.13118216
26.66526239	×ÔÉí³µÁ¾	Road 1	436.7714497	86.2992897	-0.0005511	0.188923866	0	0.011764706	459.2061	987.9023	643.1452	1.0192	3.4903	1553	1.173036085	0.002709713	56.80833913	0.131227263
26.68200374	×ÔÉí³µÁ¾	Road 1	437.1727858	86.30185776	-0.0005511	0.188065156	0	0.011764706	459.5421	987.9063	643.1281	1.0213	3.4882	1554	1.085640445	0.002507829	56.82651422	0.131269248
26.69865969	×ÔÉí³µÁ¾	Road 1	437.5720863	86.30442581	-0.0005511	0.188494667	0	0.011764706	459.8781	987.9102	643.1108	1.0235	3.486	1555	1.086250475	0.002509239	56.84460675	0.131311042
26.71526908	×ÔÉí³µÁ¾	Road 1	437.9702826	86.30700073	-0.0005511	0.188035175	0	0.011764706	460.2142	987.9141	643.0936	1.0256	3.4838	1556	1.086904582	0.00251075	56.86265957	0.131352744
26.73196205	×ÔÉí³µÁ¾	Road 1	438.3705053	86.31188965	-0.0005511	0.188625157	0	0.011764706	460.8383	987.9219	643.0618	1.0292	3.4802	1557	1.189763861	0.002748355	56.88252026	0.131398622
26.74878148	×ÔÉí³µÁ¾	Road 1	438.7737658	86.31315994	-0.0005511	0.187776029	0	0.011764706	461.0063	987.9238	643.0531	1.0302	3.4791	1558	1.027659786	0.002373894	56.89980491	0.131438549
26.76525011	×ÔÉí³µÁ¾	Road 1	439.1686304	86.31634598	-0.000553566	0.188435391	0	0.011764706	461.4385	987.9287	643.031	1.0332	3.4762	1559	1.115657561	0.002577169	56.91817827	0.131480992
26.7819878	×ÔÉí³µÁ¾	Road 1	439.5699596	86.31927795	-0.000557898	0.187986135	0	0.011764706	461.8226	987.9336	643.0114	1.0353	3.4741	1560	1.102042935	0.002545719	56.93662392	0.131523601
26.79870019	×ÔÉí³µÁ¾	Road 1	439.9706968	86.32239532	-0.000561629	0.188415676	0	0.011764706	462.2307	987.9385	642.9905	1.0378	3.4715	1561	1.110544873	0.002565359	56.95518378	0.131566475
26.81527733	×ÔÉí³µÁ¾	Road 1	440.3682104	86.32667313	-0.000568512	0.188635692	0	0.011764706	462.8069	987.9443	642.9611	1.0425	3.4669	1562	1.163941948	0.002688706	56.9744786	0.131611046
26.83197323	×ÔÉí³µÁ¾	Road 1	440.7685843	86.32935791	-0.000574186	0.188785598	0	0.011764706	463.1431	987.9482	642.9438	1.0447	3.4647	1563	1.091418252	0.002521176	56.99270081	0.131653139
26.84866436	×ÔÉí³µÁ¾	Road 1	441.1688564	86.33201523	-0.000585645	0.188133866	0	0.011764706	463.4792	987.9531	642.9266	1.0459	3.4635	1564	1.090249203	0.002518476	57.01089831	0.131695175
26.8653522	×ÔÉí³µÁ¾	Road 1	441.5690593	86.33419189	-0.000599207	0.161313996	0	0.019607844	463.8394	987.957	642.9082	1.0485	3.4609	1565	1.068803703	0.002468937	57.02873433	0.131736376
26.88208768	×ÔÉí³µÁ¾	Road 1	441.97039	86.33093033	-0.000616286	0.03579108	0	0.027450981	464.4156	987.9639	642.8788	1.0521	3.4572	1566	0.971462791	0.002244079	57.04499223	0.131773932
26.89864576	×ÔÉí³µÁ¾	Road 1	442.3674361	86.32441406	-0.000643189	-0.004118781	0	0.027450981	464.7518	987.9678	642.8616	1.0543	3.455	1567	0.971412109	0.002243962	57.06107695	0.131811088
26.91532846	×ÔÉí³µÁ¾	Road 1	442.7674407	86.317939	-0.000671566	0.028350934	0	0.027450981	465.0879	987.9717	642.8444	1.0565	3.4528	1568	0.971361748	0.002243846	57.07728189	0.131848521
26.9319987	×ÔÉí³µÁ¾	Road 1	443.1671211	86.31245956	-0.000703659	0.086183555	0	0.027450981	465.592	987.9775	642.8186	1.0598	3.4495	1569	0.97131913	0.002243747	57.09347401	0.131885925
26.94869607	×ÔÉí³µÁ¾	Road 1	443.5674387	86.30961685	-0.000745004	0.070313357	0	0.027450981	465.9281	987.9814	642.8014	1.062	3.4473	1570	0.97129702	0.002243696	57.10969211	0.131923389
26.96528567	×ÔÉí³µÁ¾	Road 1	443.9651337	86.30119858	-0.000785597	-0.025247077	0	0.035294119	466.4322	987.9873	642.7756	1.0653	3.4441	1571	0.971231544	0.002243545	57.12580445	0.131960608
26.98199843	×ÔÉí³µÁ¾	Road 1	444.365737	86.29164734	-0.000832491	-0.055219494	0	0.035294119	466.7682	987.9912	642.7585	1.0675	3.4419	1572	0.971157257	0.002243373	57.14203517	0.131998101
26.99880906	×ÔÉí³µÁ¾	Road 1	444.7686403	86.28183517	-0.000889656	-0.043415684	0	0.035294119	467.1041	987.9951	642.7413	1.0697	3.4397	1573	0.97108094	0.002243197	57.15835966	0.132035811
27.01527293	×ÔÉí³µÁ¾	Road 1	445.1631824	86.27081451	-0.000946729	0.01617497	0	0.035294119	467.608	988.002	642.7155	1.072	3.4375	1574	0.970995224	0.002242999	57.174346	0.132072739
27.0319439	×ÔÉí³µÁ¾	Road 1	445.5626585	86.26455231	-0.001005274	0.004426541	0	0.035294119	467.9439	988.0059	642.6984	1.0742	3.4353	1575	0.970946518	0.002242886	57.19053262	0.13211013
27.04868086	×ÔÉí³µÁ¾	Road 1	445.9636754	86.25588684	-0.00107001	-0.053569183	0	0.043137256	468.3038	988.0098	642.6799	1.0769	3.4327	1576	0.97087912	0.002242731	57.20678218	0.132147667
27.06528658	×ÔÉí³µÁ¾	Road 1	446.3614626	86.23735428	-0.001129505	-0.137366727	0	0.043137256	468.8075	988.0156	642.6542	1.0802	3.4295	1577	0.970734978	0.002242398	57.22290194	0.132184903
27.08199238	×ÔÉí³µÁ¾	Road 1	446.7615836	86.22369003	-0.001188081	-0.135007545	0	0.050980393	469.1433	988.0195	642.637	1.0824	3.4273	1578	0.9706287	0.002242152	57.23911706	0.13222236
27.09863549	×ÔÉí³µÁ¾	Road 1	447.1601334	86.20858383	-0.001253965	-0.150991857	0	0.050980393	469.503	988.0244	642.6187	1.085	3.4257	1579	0.970511208	0.002241881	57.25526939	0.132259672
27.115316	×ÔÉí³µÁ¾	Road 1	447.5595044	86.19256439	-0.001307953	-0.163924828	0	0.050980393	469.8625	988.0283	642.6002	1.0876	3.4231	1580	0.970386612	0.002241593	57.27145593	0.132297063
27.1319954	×ÔÉí³µÁ¾	Road 1	447.9587398	86.16899872	-0.001357849	-0.152178928	0	0.050980393	470.3899	988.0352	642.5732	1.0904	3.4204	1581	0.970203323	0.00224117	57.28763835	0.132334445
27.14868067	×ÔÉí³µÁ¾	Road 1	448.3580473	86.15426331	-0.001405548	-0.168269962	0	0.05882353	470.7253	988.0391	642.5562	1.0925	3.4182	1582	0.970088715	0.002240905	57.30382454	0.132371835
27.16534542	×ÔÉí³µÁ¾	Road 1	448.7567389	86.1273262	-0.001439127	-0.259054244	0	0.05882353	471.2285	988.0449	642.5304	1.0958	3.415	1583	0.969879204	0.002240421	57.31998732	0.132409171
27.18196617	×ÔÉí³µÁ¾	Road 1	449.1543314	86.11719131	-0.001467318	-0.26707235	0	0.05882353	471.3961	988.0469	642.5219	1.0969	3.4139	1584	0.969800377	0.002240239	57.33610614	0.132446405
27.19865804	×ÔÉí³µÁ¾	Road 1	449.5534675	86.08323669	-0.001494677	-0.226351738	0	0.05882353	471.9948	988.0547	642.4912	1.1	3.4109	1585	0.969536285	0.002239629	57.35228951	0.132483789
27.21531875	×ÔÉí³µÁ¾	Road 1	449.9517815	86.06659241	-0.001509085	-0.192713082	0	0.05882353	472.3299	988.0586	642.4741	1.1022	3.4088	1586	0.96940683	0.00223933	57.36844052	0.132521098
27.2319604	×ÔÉí³µÁ¾	Road 1	450.3495626	86.04987259	-0.001519952	-0.190035716	0	0.050980393	472.665	988.0625	642.4569	1.1043	3.4066	1587	0.969276787	0.002239029	57.38457088	0.132558359
27.248767	×ÔÉí³µÁ¾	Road 1	450.7512091	86.0333107	-0.00152844	-0.145645365	0	0.050980393	473.0239	988.0674	642.4386	1.106	3.405	1588	0.969147972	0.002238732	57.40085896	0.132595984
27.26523783	×ÔÉí³µÁ¾	Road 1	451.1447266	86.01039734	-0.00152844	-0.13042286	0	0.050980393	473.5981	988.0742	642.4092	1.1096	3.4015	1589	0.968969757	0.00223832	57.4168187	0.132632851
27.28194583	×ÔÉí³µÁ¾	Road 1	451.5438443	85.99618378	-0.00152844	-0.157624871	0	0.050980393	473.933	988.0781	642.3921	1.1117	3.3993	1590	0.968859207	0.002238065	57.4330064	0.132670245
27.29862963	×ÔÉí³µÁ¾	Road 1	451.9423155	85.98136597	-0.00152844	-0.146442339	0	0.043137256	474.2678	988.082	642.3749	1.1139	3.3972	1591	0.968743958	0.002237799	57.44916873	0.13270758
27.3153215	×ÔÉí³µÁ¾	Road 1	452.3409108	85.96660309	-0.00152844	0.077348366	0	0.027450981	474.7938	988.0889	642.348	1.1176	3.3945	1592	0.968629135	0.002237533	57.46533696	0.132744928
27.33194152	×ÔÉí³µÁ¾	Road 1	452.7377917	85.96687775	-0.00152844	0.174159959	0	0.027450981	475.1285	988.0928	642.3309	1.1198	3.3924	1593	0.980908616	0.002265899	57.48163968	0.132782588
27.34865281	×ÔÉí³µÁ¾	Road 1	453.1368556	85.96760559	-0.00152844	0.108394332	0	0.019607844	475.6306	988.0996	642.3053	1.1221	3.3902	1594	1.000994388	0.002312297	57.4983676	0.132821229
27.36530473	×ÔÉí³µÁ¾	Road 1	453.5344904	85.9652092	-0.00152844	0.085446969	0	0.019607844	475.9654	988.1035	642.2881	1.1243	3.388	1595	0.968618294	0.002237508	57.51449694	0.132858488
27.38202739	×ÔÉí³µÁ¾	Road 1	453.9338065	85.96348572	-0.00152844	0.132613331	0	0.011764706	476.3001	988.1074	642.271	1.1264	3.3859	1596	0.968604889	0.002237477	57.53069459	0.132895905
27.39864264	×ÔÉí³µÁ¾	Road 1	454.3305822	85.96871796	-0.001529655	0.250937432	0	0.011764706	476.8022	988.1143	642.2454	1.1287	3.3836	1597	1.202594341	0.002777993	57.55067601	0.132942062
27.41532535	×ÔÉí³µÁ¾	Road 1	454.7289821	85.9716568	-0.001529655	0.252156109	0	0.011764706	476.9695	988.1162	642.2368	1.1298	3.3825	1598	1.099547697	0.002539955	57.56901943	0.132984435
27.43191128	×ÔÉí³µÁ¾	Road 1	455.1250975	85.97740402	-0.001534522	0.174597934	0	0.011764706	477.4717	988.1221	642.2112	1.1331	3.3802	1599	1.226167932	0.002832448	57.58935657	0.133031414
27.44878166	×ÔÉí³µÁ¾	Road 1	455.5280113	85.97848206	-0.001538179	0.149940208	0	0.011764706	477.8064	988.127	642.194	1.1343	3.379	1600	1.016201169	0.002347425	57.60650027	0.133071016
27.46527852	×ÔÉí³µÁ¾	Road 1	455.9220116	85.98008194	-0.00154551	0.184678718	0	0.011764706	478.213	988.1318	642.1733	1.1368	3.3765	1601	1.040793938	0.002404234	57.62367011	0.133110678
27.48194326	×ÔÉí³µÁ¾	Road 1	456.3200406	85.98419495	-0.001554093	0.214902177	0	0.011764706	478.5956	988.1367	642.1537	1.1398	3.3744	1602	1.152158671	0.002661487	57.64287053	0.133155031
27.4988426	×ÔÉí³µÁ¾	Road 1	456.723697	85.98933105	-0.001565175	0.192882091	0	0.011764706	479.0978	988.1436	642.1281	1.1421	3.3721	1603	1.194650193	0.002759642	57.66305933	0.133201667
27.51534019	×ÔÉí³µÁ¾	Road 1	457.1177678	85.99164505	-0.001580032	0.17587395	0	0.011764706	479.4326	988.1475	642.1109	1.1443	3.37	1604	1.073056931	0.002478762	57.68076219	0.133242561
27.53194372	×ÔÉí³µÁ¾	Road 1	457.5143787	85.99372559	-0.001591236	0.180137441	0	0.011764706	479.7913	988.1523	642.0925	1.1459	3.3683	1605	1.061961463	0.002453131	57.69839449	0.133283291
27.54866088	×ÔÉí³µÁ¾	Road 1	457.9137258	85.99843597	-0.001607514	0.198726997	0	0.011764706	480.3653	988.1592	642.0632	1.1495	3.3647	1606	1.178281164	0.002721829	57.71809201	0.133328793
27.56530949	×ÔÉí³µÁ¾	Road 1	458.3114491	86.00138855	-0.001622637	0.195112512	0	0.011764706	480.7002	988.1641	642.0461	1.1507	3.3635	1607	1.100705327	0.002542629	57.73641722	0.133371124
27.58192072	×ÔÉí³µÁ¾	Road 1	458.7082922	86.0042038	-0.001639128	0.186715111	0	0.011764706	481.0351	988.168	642.029	1.1529	3.3614	1608	1.094883824	0.002529182	57.75460459	0.133413137
27.59856567	×ÔÉí³µÁ¾	Road 1	459.1059585	86.00798721	-0.001651889	0.186318159	0	0.011764706	481.5613	988.1748	642.0021	1.1556	3.3586	1609	1.137895484	0.002628539	57.7735448	0.133456888
27.61532241	×ÔÉí³µÁ¾	Road 1	459.5063084	86.0106926	-0.00166343	0.190793872	0	0.011764706	481.8962	988.1797	641.9849	1.1568	3.3574	1610	1.088976602	0.002515536	57.7917925	0.133499041
27.63195527	×ÔÉí³µÁ¾	Road 1	459.9037165	86.01467514	-0.001672443	0.192201376	0	0.011764706	482.3985	988.1855	641.9592	1.161	3.3542	1611	1.146982281	0.002649529	57.81087009	0.13354311
27.64861927	×ÔÉí³µÁ¾	Road 1	460.301882	86.01746979	-0.001682784	0.188510731	0	0.011764706	482.7335	988.1904	641.9421	1.1622	3.353	1612	1.093688498	0.00252642	57.82909533	0.13358521
27.66530674	×ÔÉí³µÁ¾	Road 1	460.7006178	86.01956406	-0.001686673	0.163995624	0	0.019607844	483.0684	988.1943	641.925	1.1644	3.3508	1613	1.062333596	0.002453991	57.84682298	0.133626161
27.68195352	×ÔÉí³µÁ¾	Road 1	461.0983803	86.0193306	-0.001690568	0.102176614	0	0.019607844	483.4033	988.1992	641.9079	1.1656	3.3496	1614	0.969039238	0.002238481	57.86295437	0.133663425
27.6987286	×ÔÉí³µÁ¾	Road 1	461.4991844	86.01419449	-0.001693168	0.057225615	0	0.027450981	483.9535	988.2061	641.8798	1.1688	3.3464	1615	0.96899929	0.002238388	57.8792094	0.133700974
27.71533726	×ÔÉí³µÁ¾	Road 1	461.8959895	86.00926437	-0.001693168	0.01274248	0	0.035294119	484.2884	988.2109	641.8627	1.17	3.3452	1616	0.968960945	0.0022383	57.89530255	0.133738149
27.73191696	×ÔÉí³µÁ¾	Road 1	462.2920371	85.99498901	-0.001693168	-0.114337012	0	0.043137256	484.7907	988.2178	641.837	1.1723	3.3429	1617	0.968849915	0.002238043	57.91136579	0.133775255
27.74871183	×ÔÉí³µÁ¾	Road 1	462.6931579	85.98071365	-0.001693168	-0.169685975	0	0.050980393	485.1255	988.2217	641.8198	1.1744	3.3408	1618	0.968738884	0.002237787	57.92763563	0.133812838
27.76535275	×ÔÉí³µÁ¾	Road 1	463.0905234	85.96377411	-0.001693168	-0.233475313	0	0.06666667	485.4603	988.2266	641.8027	1.1756	3.3396	1619	0.968607132	0.002237482	57.94375414	0.133850072
27.78196727	×ÔÉí³µÁ¾	Road 1	463.4870899	85.92718277	-0.001693168	-0.470131397	0	0.082352944	485.9622	988.2334	641.7771	1.1789	3.3373	1620	0.968322533	0.002236825	57.95984236	0.133887236
27.79872658	×ÔÉí³µÁ¾	Road 1	463.8869539	85.89315948	-0.001693168	-0.593825758	0	0.098039217	486.2967	988.2373	641.7599	1.1811	3.3351	1621	0.968057907	0.002236214	57.97606635	0.133924713
27.81531288	×ÔÉí³µÁ¾	Road 1	464.2824989	85.85171356	-0.001693168	-0.640313268	0	0.098039217	486.6311	988.2422	641.7429	1.1822	3.3339	1622	0.96773555	0.002235469	57.9921175	0.133961791
27.83196846	×ÔÉí³µÁ¾	Road 1	464.6794448	85.79739304	-0.001693168	-0.623901904	0	0.113725491	487.1323	988.249	641.7172	1.1845	3.3316	1623	0.967313057	0.002234493	58.00822866	0.133999008
27.84866876	×ÔÉí³µÁ¾	Road 1	465.0772666	85.75645523	-0.001693168	-0.732865155	0	0.121568628	487.4663	988.2529	641.7002	1.1867	3.3295	1624	0.966994652	0.002233758	58.02437776	0.134036313
27.86524699	×ÔÉí³µÁ¾	Road 1	465.4718346	85.68131561	-0.001693168	-0.968194544	0	0.137254909	487.9669	988.2598	641.6746	1.1889	3.3272	1625	0.966410233	0.002232408	58.04039913	0.134073322
27.88197735	×ÔÉí³µÁ¾	Road 1	465.8697547	85.62354126	-0.001693168	-1.033029556	0	0.145098045	488.3004	988.2646	641.6576	1.1901	3.326	1626	0.965960876	0.00223137	58.05656	0.134110654
27.89863989	×ÔÉí³µÁ¾	Road 1	466.2657889	85.56455154	-0.001693168	-1.03253758	0	0.152941182	488.6337	988.2695	641.6405	1.1913	3.3249	1627	0.965502068	0.00223031	58.07264772	0.134147816
27.91531197	×ÔÉí³µÁ¾	Road 1	466.6617747	85.50519104	-0.001693168	-1.063068986	0	0.160784319	488.9667	988.2734	641.6235	1.1934	3.3227	1628	0.965040375	0.002229243	58.08873694	0.134184982
27.9318803	×ÔÉí³µÁ¾	Road 1	467.054945	85.42879486	-0.001693168	-1.154858112	0	0.168627456	489.3708	988.2793	641.6028	1.1959	3.3212	1629	0.964446182	0.002227871	58.10471621	0.134221894
27.94863412	×ÔÉí³µÁ¾	Road 1	467.4521353	85.34683685	-0.001693168	-1.234981894	0	0.176470593	489.7508	988.2842	641.5834	1.1979	3.3192	1630	0.963808731	0.002226398	58.12086369	0.134259195
27.96529886	×ÔÉí³µÁ¾	Road 1	467.846745	85.24554291	-0.001693168	-1.281667233	0	0.176470593	490.2489	988.291	641.5579	1.2001	3.317	1631	0.963020889	0.002224578	58.13691218	0.134296267
27.98194454	×ÔÉí³µÁ¾	Road 1	468.2405759	85.17470169	-0.001693168	-1.253614068	0	0.176470593	490.5807	988.2959	641.541	1.2012	3.3159	1632	0.962469902	0.002223305	58.15293315	0.134333276
27.9985719	×ÔÉí³µÁ¾	Road 1	468.6334736	85.06656189	-0.001693168	-1.219202399	0	0.176470593	491.1015	988.3027	641.5143	1.2038	3.3132	1633	0.961628815	0.002221363	58.16892249	0.134370211
28.01524764	×ÔÉí³µÁ¾	Road 1	469.0271987	84.99836426	-0.001693168	-1.208116531	0	0.168627456	491.4326	988.3076	641.4974	1.2049	3.3121	1634	0.961098389	0.002220137	58.18494952	0.134407233
28.03189039	×ÔÉí³µÁ¾	Road 1	469.419687	84.89930878	-0.001693168	-1.145004272	0	0.168627456	491.9286	988.3145	641.4721	1.207	3.3109	1635	0.960327957	0.002218358	58.20093201	0.134444153
28.04870651	×ÔÉí³µÁ¾	Road 1	469.8159416	84.83024597	-0.001693168	-1.148996592	0	0.168627456	492.2827	988.3193	641.454	1.2085	3.3094	1636	0.959790802	0.002217117	58.21707198	0.134481436
28.06526349	×ÔÉí³µÁ¾	Road 1	470.2057683	84.76041412	-0.001693168	-1.152530909	0	0.160784319	492.6364	988.3242	641.4359	1.211	3.3078	1637	0.959247665	0.002215862	58.23295422	0.134518124
28.08194399	×ÔÉí³µÁ¾	Road 1	470.5982108	84.69727707	-0.001693168	-1.076375365	0	0.152941182	492.9663	988.3291	641.4191	1.2121	3.3067	1638	0.958756599	0.002214728	58.24894676	0.134555067
28.09864283	×ÔÉí³µÁ¾	Road 1	470.9908146	84.6390564	-0.001693168	-0.977904737	0	0.152941182	493.296	988.334	641.4022	1.2132	3.3056	1639	0.958303772	0.002213682	58.26494932	0.134592033
28.11528777	×ÔÉí³µÁ¾	Road 1	471.3817072	84.54298096	-0.001693168	-1.013721228	0	0.152941182	493.8606	988.3418	641.3734	1.2155	3.3032	1640	0.957556519	0.002211956	58.2808878	0.134628851
28.131991	×ÔÉí³µÁ¾	Road 1	471.7736934	84.48366852	-0.001693168	-1.047776699	0	0.145098045	494.1896	988.3467	641.3566	1.2166	3.3021	1641	0.9570952	0.00221089	58.29687438	0.13466578
28.14860406	×ÔÉí³µÁ¾	Road 1	472.163295	84.42550964	-0.001693168	-0.97981751	0	0.145098045	494.5184	988.3506	641.3397	1.2186	3.3	1642	0.956642853	0.002209845	58.31276714	0.134702492
28.16519953	×ÔÉí³µÁ¾	Road 1	472.5520995	84.34209595	-0.001693168	-0.869992793	0	0.137254909	495.0347	988.3584	641.3134	1.2202	3.2984	1643	0.95599408	0.002208346	58.32863231	0.134739141
28.1818716	×ÔÉí³µÁ¾	Road 1	472.9424673	84.29209442	-0.001693168	-0.851343751	0	0.137254909	495.363	988.3633	641.2966	1.2212	3.2973	1644	0.955605179	0.002207448	58.34456423	0.134775943
28.19873098	×ÔÉí³µÁ¾	Road 1	473.3368629	84.21566391	-0.001693168	-0.904518545	0	0.137254909	495.8551	988.3701	641.2715	1.2233	3.2952	1645	0.955010719	0.002206075	58.36066512	0.134813136
28.21528539	×ÔÉí³µÁ¾	Road 1	473.7238836	84.16335526	-0.001693168	-0.883710325	0	0.129411772	496.1829	988.375	641.2546	1.2253	3.2942	1646	0.954603874	0.002205135	58.37646802	0.134849641
28.23194793	×ÔÉí³µÁ¾	Road 1	474.1132059	84.11443176	-0.001693168	-0.78042829	0	0.121568628	496.5104	988.3799	641.238	1.2263	3.2932	1647	0.954223358	0.002204256	58.39236781	0.13488637
28.24870102	×ÔÉí³µÁ¾	Road 1	474.5043472	84.05071793	-0.001693168	-0.678728104	0	0.121568628	497.0015	988.3867	641.2129	1.2283	3.2913	1648	0.953727806	0.002203111	58.40834569	0.134923279
28.2652173	×ÔÉí³µÁ¾	Road 1	474.8897658	84.00840683	-0.001693168	-0.731910706	0	0.121568628	497.3287	988.3916	641.1961	1.2294	3.2903	1649	0.95339872	0.002202351	58.4240923	0.134959653
28.2819374	×ÔÉí³µÁ¾	Road 1	475.2797303	83.96317749	-0.001693168	-0.771285534	0	0.113725491	497.6557	988.3965	641.1794	1.2304	3.2894	1650	0.953046936	0.002201538	58.44002733	0.134996463
28.29859334	×ÔÉí³µÁ¾	Road 1	475.6679962	83.91942444	-0.001693168	-0.683310986	0	0.105882354	497.9825	988.4004	641.1627	1.2324	3.2874	1651	0.952706635	0.002200752	58.45589556	0.135033119
28.31524085	×ÔÉí³µÁ¾	Road 1	476.0558578	83.87450409	-0.001693168	-0.537545443	0	0.105882354	498.3792	988.4063	641.1425	1.2337	3.2862	1652	0.952357254	0.002199945	58.47174994	0.135069742
28.33193529	×ÔÉí³µÁ¾	Road 1	476.4446341	83.83600388	-0.001693168	-0.557959557	0	0.105882354	498.7523	988.4121	641.1234	1.2346	3.2853	1653	0.952057808	0.002199254	58.487644	0.135106458
28.34863559	×ÔÉí³µÁ¾	Road 1	476.8332406	83.76996918	-0.001693168	-0.674378097	0	0.105882354	499.3116	988.4199	641.0948	1.2379	3.2827	1654	0.951544205	0.002198067	58.50353508	0.135143166
28.36521492	×ÔÉí³µÁ¾	Road 1	477.2188442	83.72911377	-0.001693168	-0.672657907	0	0.113725491	499.6377	988.4248	641.0781	1.2389	3.2816	1655	0.95122644	0.002197333	58.51930578	0.135179596
28.38193208	×ÔÉí³µÁ¾	Road 1	477.6073667	83.66737747	-0.001693168	-0.69415617	0	0.113725491	500.1265	988.4326	641.0532	1.2399	3.2804	1656	0.950746269	0.002196224	58.53519955	0.135216311
28.39861295	×ÔÉí³µÁ¾	Road 1	477.994849	83.62490845	-0.001694469	-0.722373784	0	0.121568628	500.4522	988.4365	641.0365	1.2419	3.2783	1657	0.950415955	0.002195461	58.55105332	0.135252933
28.41529126	×ÔÉí³µÁ¾	Road 1	478.3820652	83.58033142	-0.001699679	-0.774658322	0	0.121568628	500.7777	988.4414	641.0198	1.243	3.2773	1658	0.950069244	0.00219466	58.56689886	0.135289536
28.43190798	×ÔÉí³µÁ¾	Road 1	478.7675307	83.5108017	-0.001706207	-0.776210845	0	0.121568628	501.2656	988.4492	640.9949	1.2441	3.2764	1659	0.949528458	0.002193411	58.58267692	0.135325984
28.44872338	×ÔÉí³µÁ¾	Road 1	479.1573942	83.46567535	-0.001720628	-0.743869781	0	0.121568628	501.5907	988.4541	640.9784	1.2451	3.2754	1660	0.949177475	0.0021926	58.59863771	0.135362853
28.46524846	×ÔÉí³µÁ¾	Road 1	479.5403236	83.42142105	-0.001736451	-0.757794559	0	0.129411772	501.9156	988.459	640.9617	1.2462	3.2744	1661	0.948833275	0.002191805	58.61431726	0.135399073
28.48187911	×ÔÉí³µÁ¾	Road 1	479.9253637	83.34876022	-0.001749712	-0.904103696	0	0.137254909	502.4026	988.4658	640.9369	1.2482	3.2724	1662	0.948268135	0.002190499	58.63008758	0.135435502
28.49868901	×ÔÉí³µÁ¾	Road 1	480.314296	83.29356766	-0.001765713	-1.013076425	0	0.152941182	502.727	988.4707	640.9203	1.2502	3.2713	1663	0.94783886	0.002189508	58.64602066	0.135472308
28.51522729	×ÔÉí³µÁ¾	Road 1	480.6965223	83.20179749	-0.001777778	-1.103856921	0	0.152941182	503.2131	988.4785	640.8954	1.2511	3.2703	1664	0.947125092	0.002187859	58.66168448	0.135508491
28.53193089	×ÔÉí³µÁ¾	Road 1	481.0822821	83.13989639	-0.001788548	-1.095436096	0	0.168627456	503.537	988.4834	640.8789	1.252	3.2693	1665	0.946643639	0.002186747	58.67749683	0.135545018
28.56531719	×ÔÉí³µÁ¾	Road 1	481.8517385	82.96944351	-0.00179395	-1.316244364	0	0.176470593	504.3454	988.4951	640.8376	1.2549	3.2662	1666	0.945317894	0.002183684	58.7090575	0.135617923
28.58196984	×ÔÉí³µÁ¾	Road 1	482.2351996	82.89734573	-0.001795302	-1.265445113	0	0.176470593	504.6683	988.5	640.8211	1.2561	3.2652	1667	0.944757133	0.002182389	58.7247902	0.135654265
28.59861185	×ÔÉí³µÁ¾	Road 1	482.6180931	82.82749329	-0.001798008	-1.289913774	0	0.20784314	504.9909	988.5049	640.8046	1.2573	3.2642	1668	0.944213837	0.002181134	58.74050382	0.135690564
28.6152579	×ÔÉí³µÁ¾	Road 1	483.0006611	82.73704147	-0.001798008	-1.573322058	0	0.20784314	505.3593	988.5107	640.7858	1.2583	3.2644	1669	0.943510323	0.002179509	58.75620954	0.135726844
28.631967	×ÔÉí³µÁ¾	Road 1	483.3842299	82.64047852	-0.001798008	-1.684525728	0	0.215686277	505.7042	988.5156	640.7681	1.2607	3.2629	1670	0.942759277	0.002177774	58.7719622	0.135763233
28.64857272	×ÔÉí³µÁ¾	Road 1	483.7649237	82.53163147	-0.001798008	-1.589659691	0	0.215686277	506.0946	988.5215	640.7482	1.2618	3.2617	1671	0.941912689	0.002175818	58.78760334	0.135799364
28.6652129	×ÔÉí³µÁ¾	Road 1	484.1458261	82.40585861	-0.001798008	-1.508506536	0	0.215686277	506.5762	988.5293	640.7236	1.2627	3.2608	1672	0.940934456	0.002173559	58.80326066	0.135835532
28.68188608	×ÔÉí³µÁ¾	Road 1	484.5270948	82.32190247	-0.001798008	-1.559073925	0	0.215686277	506.8969	988.5342	640.7072	1.2636	3.2599	1673	0.940281464	0.00217205	58.81893814	0.135871747
28.69858858	×ÔÉí³µÁ¾	Road 1	484.9086027	82.2289444	-0.001798008	-1.603478193	0	0.215686277	507.2401	988.54	640.6897	1.2639	3.2595	1674	0.939558456	0.00217038	58.83463111	0.135907998
28.71529034	×ÔÉí³µÁ¾	Road 1	485.2896026	82.12302246	-0.001798008	-1.581622958	0	0.215686277	507.6286	988.5459	640.6699	1.2651	3.2584	1675	0.938734619	0.002168477	58.85030964	0.135944215
28.731899	×ÔÉí³µÁ¾	Road 1	485.6678315	81.98278885	-0.001798008	-1.552720308	0	0.215686277	508.1534	988.5537	640.643	1.2667	3.2567	1676	0.937643913	0.002165957	58.86588264	0.135980189
28.74866271	×ÔÉí³µÁ¾	Road 1	486.0491953	81.89769974	-0.001798008	-1.544291377	0	0.20784314	508.4725	988.5586	640.6267	1.2676	3.2558	1677	0.936982109	0.002164429	58.88158994	0.136016473
28.76519733	×ÔÉí³µÁ¾	Road 1	486.4249394	81.80891647	-0.001798008	-1.490098238	0	0.20784314	508.7912	988.5635	640.6105	1.2694	3.2549	1678	0.936291573	0.002162834	58.89707116	0.136052234
28.78189103	×ÔÉí³µÁ¾	Road 1	486.8037713	81.69518051	-0.001798008	-1.388427973	0	0.192156866	509.2686	988.5713	640.5861	1.2702	3.2541	1679	0.93540696	0.00216079	58.91268657	0.136088306
28.79867013	×ÔÉí³µÁ¾	Road 1	487.1842001	81.6219635	-0.001798008	-1.25272882	0	0.176470593	509.5865	988.5762	640.5698	1.271	3.2533	1680	0.934837494	0.002159475	58.92837231	0.13612454
28.8159155	×ÔÉí³µÁ¾	Road 1	487.5747383	81.52551041	-0.001798008	-1.065054178	0	0.168627456	510.0629	988.584	640.5455	1.2718	3.2525	1681	0.934087303	0.002157742	58.94448098	0.136161751
28.83192557	×ÔÉí³µÁ¾	Road 1	487.9370351	81.46549072	-0.001798008	-1.061109185	0	0.160784319	510.3802	988.5889	640.5293	1.2727	3.2516	1682	0.933620483	0.002156663	58.95942832	0.136196279
28.84865813	×ÔÉí³µÁ¾	Road 1	488.3152756	81.37823181	-0.001798008	-1.013185382	0	0.137254909	510.8557	988.5967	640.505	1.2735	3.2508	1683	0.932941803	0.002155096	58.97503882	0.13623234
28.86521804	×ÔÉí³µÁ¾	Road 1	488.6893949	81.33075714	-0.001798008	-0.702260196	0	0.121568628	511.1725	988.6016	640.4888	1.2744	3.25	1684	0.932572556	0.002154243	58.99048213	0.136268014
28.88317746	×ÔÉí³µÁ¾	Road 1	489.094876	81.27945099	-0.001798008	-0.502875328	0	0.105882354	511.6247	988.6084	640.4657	1.2767	3.2487	1685	0.932173508	0.002153321	59.00722343	0.136306686
28.89854092	×ÔÉí³µÁ¾	Road 1	489.4416314	81.25245209	-0.001798008	-0.491309345	0	0.090196081	511.7829	988.6113	640.4576	1.2767	3.2487	1686	0.931963516	0.002152836	59.02154162	0.136339761
28.9151932	×ÔÉí³µÁ¾	Road 1	489.8173128	81.21730957	-0.001798008	-0.369844288	0	0.074509807	512.2799	988.6191	640.4323	1.2779	3.2476	1687	0.931690186	0.002152204	59.03705638	0.1363756
28.93190303	×ÔÉí³µÁ¾	Road 1	490.1941892	81.19502792	-0.001798008	-0.214121491	0	0.06666667	512.6187	988.625	640.4149	1.2782	3.2473	1688	0.931516884	0.002151804	59.05262187	0.136411557
28.94875912	×ÔÉí³µÁ¾	Road 1	490.5742541	81.17148285	-0.001798008	-0.194402963	0	0.06666667	513.0928	988.6318	640.3907	1.28	3.2456	1689	0.931333755	0.002151381	59.06832051	0.13644782
28.96525561	×ÔÉí³µÁ¾	Road 1	490.9461221	81.15208511	-0.001798008	-0.312268555	0	0.074509807	513.4088	988.6377	640.3746	1.2799	3.2457	1690	0.931182884	0.002151032	59.08368176	0.136483305
28.981854	×ÔÉí³µÁ¾	Road 1	491.3201676	81.12615738	-0.001798008	-0.440295786	0	0.082352944	513.7247	988.6426	640.3584	1.2807	3.2449	1691	0.930981224	0.002150567	59.09913456	0.136519001
28.99859792	×ÔÉí³µÁ¾	Road 1	491.6973476	81.09499054	-0.001798008	-0.5085814	0	0.090196081	514.0405	988.6475	640.3423	1.2825	3.2441	1692	0.930738815	0.002150007	59.11471877	0.136555
29.01520438	×ÔÉí³µÁ¾	Road 1	492.0712068	81.0463623	-0.001798008	-0.491104484	0	0.090196081	514.514	988.6553	640.3181	1.2833	3.2433	1693	0.930360596	0.002149133	59.13016877	0.13659069
29.03185116	×ÔÉí³µÁ¾	Road 1	492.4458345	81.0162529	-0.001798008	-0.447680146	0	0.090196081	514.8295	988.6602	640.302	1.2842	3.2425	1694	0.930126411	0.002148592	59.14565238	0.136626457
29.04872228	×ÔÉí³µÁ¾	Road 1	492.8252976	80.97077637	-0.001798008	-0.451163471	0	0.090196081	515.325	988.6689	640.2767	1.2844	3.2423	1695	0.929772705	0.002147775	59.16133868	0.136662692
29.06519311	×ÔÉí³µÁ¾	Road 1	493.1956196	80.94058456	-0.001798008	-0.478758842	0	0.090196081	515.6401	988.6738	640.2607	1.2852	3.2415	1696	0.92953788	0.002147233	59.17664894	0.136698059
29.08187655	×ÔÉí³µÁ¾	Road 1	493.5705115	80.89527283	-0.001798008	-0.424220294	0	0.082352944	516.1127	988.6816	640.2365	1.286	3.2408	1697	0.929185455	0.002146418	59.19215095	0.136733869
29.09865456	×ÔÉí³µÁ¾	Road 1	493.9474004	80.86775208	-0.001798008	-0.355157316	0	0.082352944	516.4501	988.6875	640.2192	1.2863	3.2415	1698	0.928971405	0.002145924	59.20773724	0.136769873
29.11527018	×ÔÉí³µÁ¾	Road 1	494.3205202	80.84145355	-0.001798008	-0.347186059	0	0.082352944	516.7874	988.6924	640.202	1.2885	3.2403	1699	0.928766861	0.002145451	59.22316928	0.136805521
29.13189057	×ÔÉí³µÁ¾	Road 1	494.6936169	80.81328735	-0.001798008	-0.413997918	0	0.082352944	517.1246	988.6982	640.1848	1.2888	3.24	1700	0.928547791	0.002144945	59.23860211	0.136841171
29.14852782	×ÔÉí³µÁ¾	Road 1	495.0669616	80.78504562	-0.001798008	-0.432313591	0	0.082352944	517.4391	988.7041	640.1688	1.2886	3.2401	1701	0.928328133	0.002144438	59.25404693	0.136876848
29.16524828	×ÔÉí³µÁ¾	Road 1	495.4420267	80.75341873	-0.001798008	-0.393033206	0	0.074509807	517.7985	988.71	640.1504	1.2893	3.2395	1702	0.928082146	0.00214387	59.26956489	0.136912695
29.18191265	×ÔÉí³µÁ¾	Road 1	495.8156589	80.7156601	-0.001798008	-0.274043888	0	0.074509807	518.3149	988.7188	640.124	1.2899	3.2389	1703	0.927788467	0.002143191	59.28502591	0.13694841
29.19861478	×ÔÉí³µÁ¾	Road 1	496.1900346	80.69344025	-0.001798008	-0.296610087	0	0.074509807	518.6516	988.7236	640.1068	1.2911	3.2376	1704	0.927615646	0.002142792	59.30051907	0.136984199
29.21518459	×ÔÉí³µÁ¾	Road 1	496.5613377	80.67030029	-0.001798008	-0.351322711	0	0.074509807	518.9657	988.7295	640.0908	1.2909	3.2378	1705	0.927435669	0.002142376	59.31588649	0.137019698
29.23185006	×ÔÉí³µÁ¾	Road 1	496.9346108	80.63274765	-0.001798008	-0.367650449	0	0.074509807	519.4367	988.7373	640.0667	1.2927	3.2371	1706	0.927143593	0.002141702	59.33133778	0.13705539
29.24851701	×ÔÉí³µÁ¾	Road 1	497.3078068	80.60901031	-0.001798008	-0.322476298	0	0.074509807	519.7506	988.7422	640.0507	1.2935	3.2362	1707	0.926958969	0.002141275	59.34678735	0.137091079
29.26522977	×ÔÉí³µÁ¾	Road 1	497.6819248	80.58661194	-0.001798008	-0.308077455	0	0.074509807	520.0644	988.748	640.0347	1.2933	3.2364	1708	0.92678476	0.002140873	59.36227649	0.137126859
29.28186628	×ÔÉí³µÁ¾	Road 1	498.0542244	80.56244888	-0.001798008	-0.325364769	0	0.074509807	520.4005	988.7539	640.0175	1.2936	3.2361	1709	0.926596825	0.002140439	59.37769183	0.137162468
29.29854496	×ÔÉí³µÁ¾	Road 1	498.4273343	80.53373337	-0.001798008	-0.344259799	0	0.074509807	520.7813	988.7598	639.9981	1.2946	3.2351	1710	0.926373482	0.002139923	59.39314251	0.137198159
29.31524965	×ÔÉí³µÁ¾	Road 1	498.8008916	80.5046814	-0.001798008	-0.33735016	0	0.074509807	521.162	988.7666	639.9786	1.2947	3.235	1711	0.926147522	0.002139401	59.40861352	0.137233897
29.33184988	×ÔÉí³µÁ¾	Road 1	499.1719904	80.47815628	-0.001798008	-0.325178027	0	0.074509807	521.5201	988.7725	639.9603	1.2954	3.2344	1712	0.925941216	0.002138924	59.42398436	0.137269404
29.34857034	×ÔÉí³µÁ¾	Road 1	499.5456478	80.4503334	-0.001798008	-0.326554567	0	0.074509807	521.9005	988.7793	639.9409	1.2954	3.2343	1713	0.925724815	0.002138424	59.4394629	0.137305159
29.36523765	×ÔÉí³µÁ¾	Road 1	499.9179854	80.42182388	-0.001798008	-0.333514005	0	0.074509807	522.2808	988.7861	639.9215	1.2965	3.2342	1714	0.925503075	0.002137912	59.45488855	0.137340793
29.38184997	×ÔÉí³µÁ¾	Road 1	500.2889396	80.38822632	-0.001798008	-0.334264487	0	0.074509807	522.6386	988.792	639.9032	1.2971	3.2336	1715	0.92524176	0.002137308	59.47025896	0.137376298
29.39853854	×ÔÉí³µÁ¾	Road 1	500.6614655	80.35999146	-0.001798008	-0.329687059	0	0.074509807	523.108	988.7998	639.8793	1.2978	3.2328	1716	0.925022156	0.002136801	59.48569626	0.137411958
29.41520255	×ÔÉí³µÁ¾	Road 1	501.0333352	80.33666611	-0.001798008	-0.329053581	0	0.074509807	523.4208	988.8057	639.8633	1.2977	3.233	1717	0.924840736	0.002136382	59.50110781	0.137447559
29.43191348	×ÔÉí³µÁ¾	Road 1	501.4061366	80.31180954	-0.001798008	-0.330851793	0	0.074509807	523.7559	988.8115	639.8462	1.2979	3.2328	1718	0.924647408	0.002135936	59.51655953	0.137483253
29.44853497	×ÔÉí³µÁ¾	Road 1	501.7767574	80.27168884	-0.001798008	-0.331128985	0	0.074509807	524.2917	988.8203	639.8188	1.2988	3.2318	1719	0.924335358	0.002135215	59.53192336	0.137518743
29.46521217	×ÔÉí³µÁ¾	Road 1	502.148513	80.24846649	-0.001798008	-0.330343485	0	0.074509807	524.6042	988.8262	639.8029	1.2986	3.232	1720	0.924154739	0.002134797	59.54733568	0.137554345
29.48184759	×ÔÉí³µÁ¾	Road 1	502.5192294	80.22516861	-0.001798008	-0.33032161	0	0.074509807	524.9166	988.832	639.7869	1.2994	3.2322	1721	0.923973534	0.002134379	59.56270636	0.137589852
29.49868938	×ÔÉí³µÁ¾	Road 1	502.8944124	80.19687195	-0.001798008	-0.330958962	0	0.074509807	525.2512	988.8379	639.7698	1.2997	3.232	1722	0.923753448	0.00213387	59.57826402	0.13762579
29.51524305	×ÔÉí³µÁ¾	Road 1	503.263024	80.16356277	-0.001798008	-0.330406696	0	0.074509807	525.7418	988.8457	639.7448	1.3008	3.2309	1723	0.923494377	0.002133272	59.59355125	0.137661103
29.53186124	×ÔÉí³µÁ¾	Road 1	503.6329647	80.14029236	-0.001800717	-0.329705626	0	0.074509807	526.0538	988.8516	639.7289	1.3006	3.2311	1724	0.923313385	0.002132854	59.60889505	0.137696548
29.54853075	×ÔÉí³µÁ¾	Road 1	504.00394	80.11701508	-0.001804785	-0.330402881	0	0.074509807	526.3658	988.8574	639.713	1.3004	3.2313	1725	0.923132339	0.002132436	59.62428321	0.137732094
29.56525451	×ÔÉí³µÁ¾	Road 1	504.3759371	80.07707291	-0.001806143	-0.330430508	0	0.074509807	526.7445	988.8643	639.6936	1.3004	3.2312	1726	0.922821678	0.002131718	59.63971626	0.137767745
29.58188003	×ÔÉí³µÁ¾	Road 1	504.7456411	80.05368576	-0.001810219	-0.329249203	0	0.074509807	527.2121	988.8721	639.6697	1.3011	3.2305	1727	0.922639778	0.002131298	59.65505562	0.137803178
29.5985752	×ÔÉí³µÁ¾	Road 1	505.1167864	80.03054581	-0.001811579	-0.329716712	0	0.074509807	527.5237	988.8779	639.6538	1.3009	3.2317	1728	0.922459801	0.002130882	59.67045624	0.137838754
29.61518752	×ÔÉí³µÁ¾	Road 1	505.4859752	80.00563431	-0.001817027	-0.329618067	0	0.074509807	527.8575	988.8838	639.6367	1.3021	3.2315	1729	0.922266045	0.002130435	59.68577722	0.137874145
29.63187682	×ÔÉí³µÁ¾	Road 1	505.8566863	79.96500549	-0.001818391	-0.371572286	0	0.082352944	528.3914	988.8936	639.6096	1.302	3.2316	1730	0.921950043	0.002129705	59.70116393	0.137909689
29.64856099	×ÔÉí³µÁ¾	Road 1	506.227222	79.9517395	-0.00182112	-0.404912919	0	0.082352944	528.547	988.8965	639.6016	1.3019	3.2317	1731	0.921846863	0.002129466	59.71654418	0.137945217
29.66521767	×ÔÉí³µÁ¾	Road 1	506.596902	79.89875793	-0.00182112	-0.42571339	0	0.082352944	529.1249	988.9063	639.572	1.3026	3.2309	1732	0.921434784	0.002128514	59.73189222	0.137980671
29.68199971	×ÔÉí³µÁ¾	Road 1	506.9692388	79.87184143	-0.00182112	-0.383255303	0	0.082352944	529.4359	988.9121	639.5562	1.3024	3.2312	1733	0.921225433	0.002128031	59.74735226	0.138016384
29.6986113	×ÔÉí³µÁ¾	Road 1	507.3376769	79.84649048	-0.00182112	-0.367698759	0	0.082352944	529.7468	988.918	639.5403	1.3022	3.2314	1734	0.921028259	0.002127575	59.76265201	0.138051726
29.7152119	×ÔÉí³µÁ¾	Road 1	507.7056828	79.80565567	-0.00182112	-0.405231535	0	0.082352944	530.2352	988.9268	639.5154	1.3023	3.2313	1735	0.920710655	0.002126842	59.77793635	0.138087033
29.7320218	×ÔÉí³µÁ¾	Road 1	508.0782018	79.77849197	-0.00182112	-0.391405791	0	0.074509807	530.5459	988.9326	639.4995	1.303	3.2315	1736	0.920499382	0.002126354	59.79340985	0.138122777
29.74863449	×ÔÉí³µÁ¾	Road 1	508.4461886	79.74338379	-0.00182112	-0.314707845	0	0.074509807	531.0117	988.9404	639.4757	1.3036	3.2308	1737	0.920226318	0.002125723	59.80869729	0.138158091
29.76523545	×ÔÉí³µÁ¾	Road 1	508.8138409	79.72573013	-0.00182112	-0.274463564	0	0.074509807	531.1669	988.9434	639.4678	1.3035	3.231	1738	0.920100494	0.002125432	59.82397184	0.138193375
29.78183238	×ÔÉí³µÁ¾	Road 1	509.1812815	79.70067444	-0.00182112	-0.33270973	0	0.074509807	531.6324	988.9521	639.4441	1.3031	3.2313	1739	0.919894135	0.002124955	59.83923926	0.138228643
29.79864191	×ÔÉí³µÁ¾	Road 1	509.5533093	79.6750351	-0.00182112	-0.33666265	0	0.06666667	531.9648	988.958	639.4271	1.3032	3.2311	1740	0.919694717	0.002124495	59.8546989	0.138264354
29.81526083	×ÔÉí³µÁ¾	Road 1	509.9209715	79.64316788	-0.00182112	-0.213717625	0	0.06666667	532.4521	988.9668	639.4022	1.3032	3.231	1741	0.919446861	0.002123922	59.86997911	0.138299652
29.83188892	×ÔÉí³µÁ¾	Road 1	510.2887593	79.62648926	-0.00182112	-0.183498085	0	0.05882353	532.7622	988.9727	639.3864	1.303	3.2313	1742	0.919317139	0.002123623	59.8852656	0.138334964
29.8486541	×ÔÉí³µÁ¾	Road 1	510.6594876	79.60678253	-0.00182112	-0.173528403	0	0.05882353	533.0722	988.9785	639.3706	1.3027	3.2315	1743	0.919163864	0.002123269	59.90067554	0.138370561
29.8652426	×ÔÉí³µÁ¾	Road 1	511.0262232	79.58817444	-0.00182112	-0.156145751	0	0.050980393	533.537	988.9873	639.3469	1.3023	3.2312	1744	0.919019135	0.002122934	59.91592069	0.138405777
29.88187581	×ÔÉí³µÁ¾	Road 1	511.3938875	79.57517624	-0.00182112	-0.102259621	0	0.050980393	533.8469	988.9932	639.3311	1.3021	3.2315	1745	0.918918037	0.002122701	59.93120526	0.138441084
29.89862963	×ÔÉí³µÁ¾	Road 1	511.7641671	79.56436157	-0.00182112	-0.061755195	0	0.043137256	534.1567	988.999	639.3152	1.3018	3.2317	1746	0.918833923	0.002122506	59.94659923	0.138476644
29.91522363	×ÔÉí³µÁ¾	Road 1	512.1308704	79.55478973	-0.00182112	-0.013167429	0	0.035294119	534.5107	989.0049	639.2972	1.3024	3.2311	1747	0.918759476	0.002122334	59.96184512	0.138511862
29.93187481	×ÔÉí³µÁ¾	Road 1	512.4988084	79.54852066	-0.00182112	0.055515591	0	0.027450981	534.8646	989.0117	639.2791	1.3019	3.2315	1748	0.918710716	0.002122222	59.97714274	0.1385472
29.94865281	×ÔÉí³µÁ¾	Road 1	512.8695388	79.54635773	-0.00182112	0.131159723	0	0.027450981	535.3955	989.0215	639.252	1.3017	3.2316	1749	0.918693893	0.002122183	59.99255659	0.138582806
29.96518303	×ÔÉí³µÁ¾	Road 1	513.2347904	79.54558868	-0.00182112	0.096892528	0	0.027450981	535.7052	989.0273	639.2362	1.3015	3.2319	1750	0.918687912	0.002122169	60.0077427	0.138617886
29.98188993	×ÔÉí³µÁ¾	Road 1	513.6039338	79.5429863	-0.00182112	0.079744346	0	0.019607844	536.0149	989.0332	639.2204	1.3012	3.2321	1751	0.918667671	0.002122122	60.02309079	0.13865334
29.99860232	×ÔÉí³µÁ¾	Road 1	513.9731941	79.54197693	-0.00182112	0.148514107	0	0.019607844	536.3467	989.04	639.2034	1.3004	3.2319	1752	0.918659821	0.002122104	60.03844379	0.138688805
30.015156	×ÔÉí³µÁ¾	Road 1	514.3389623	79.54521103	-0.00182112	0.201756209	0	0.019607844	536.7227	989.0469	639.1843	1.3004	3.2319	1753	1.052985366	0.002432396	60.05587457	0.13872907
30.03183027	×ÔÉí³µÁ¾	Road 1	514.7074102	79.54844513	-0.00182112	0.16574131	0	0.019607844	537.0767	989.0537	639.1662	1.3	3.2323	1754	1.052044611	0.002430223	60.07341665	0.138769592
30.04857455	×ÔÉí³µÁ¾	Road 1	515.0774068	79.54879532	-0.00182112	0.118878581	0	0.019607844	537.4528	989.0605	639.147	1.3	3.2323	1755	0.933090301	0.002155439	60.08904058	0.138805684
30.06518541	×ÔÉí³µÁ¾	Road 1	515.4444543	79.54861679	-0.00182112	0.150105059	0	0.019607844	537.9836	989.0703	639.1199	1.2999	3.2325	1756	0.918711464	0.002122223	60.10430117	0.138840936
30.08183733	×ÔÉí³µÁ¾	Road 1	515.8124161	79.55016861	-0.00182112	0.17145972	0	0.019607844	538.2934	989.0762	639.1041	1.2996	3.2327	1757	0.982789412	0.002270244	60.12066649	0.13887874
30.09862083	×ÔÉí³µÁ¾	Road 1	516.1832978	79.5527504	-0.00182112	0.163282678	0	0.019607844	538.7579	989.085	639.0803	1.2993	3.233	1758	1.024498125	0.002366591	60.13786116	0.138918459
30.11522179	×ÔÉí³µÁ¾	Road 1	516.550147	79.55305939	-0.00182112	0.134050816	0	0.027450981	538.9128	989.0889	639.0725	1.2982	3.2332	1759	0.931542214	0.002151863	60.15332566	0.138954182
30.13187334	×ÔÉí³µÁ¾	Road 1	516.9180925	79.54840393	-0.00182112	0.035928864	0	0.027450981	539.4437	989.0986	639.0454	1.2981	3.2333	1760	0.918709808	0.00212222	60.1686236	0.138989521
30.14860699	×ÔÉí³µÁ¾	Road 1	517.287829	79.54337082	-0.00182112	0.027299706	0	0.035294119	539.7534	989.1045	639.0296	1.2978	3.2335	1761	0.918670662	0.002122129	60.18399631	0.139025031
30.16521419	×ÔÉí³µÁ¾	Road 1	517.65473	79.53442383	-0.00182112	0.002401151	0	0.035294119	540.2179	989.1133	639.0059	1.2965	3.2339	1762	0.918601074	0.002121968	60.1992517	0.139060271
30.18192658	×ÔÉí³µÁ¾	Road 1	518.0239399	79.53114166	-0.00182112	0.000535578	0	0.035294119	540.3727	989.1162	638.998	1.2964	3.234	1763	0.918575546	0.00212191	60.2146033	0.139095734
30.19858143	×ÔÉí³µÁ¾	Road 1	518.3918276	79.5201416	-0.00182112	0.019617207	0	0.035294119	540.9256	989.127	638.9697	1.2957	3.2348	1764	0.91848999	0.002121712	60.2299006	0.13913107
30.21520658	×ÔÉí³µÁ¾	Road 1	518.7590358	79.51501236	-0.00182112	0.0464282	0	0.027450981	541.2352	989.1328	638.9539	1.2954	3.235	1765	0.918450096	0.00212162	60.24516998	0.139166343
30.23186253	×ÔÉí³µÁ¾	Road 1	519.1269127	79.5125679	-0.00182112	0.126416206	0	0.019607844	541.5447	989.1396	638.9382	1.2942	3.2363	1766	0.918431084	0.002121576	60.26046732	0.13920168
30.24862551	×ÔÉí³µÁ¾	Road 1	519.4971666	79.51534195	-0.00182112	0.21976167	0	0.011764706	541.8764	989.1455	638.9213	1.2944	3.2352	1767	1.032168016	0.002384308	60.27776953	0.139241648
30.26515755	×ÔÉí³µÁ¾	Road 1	519.8623708	79.52645874	-0.00182112	0.262865901	0	0.011764706	542.4072	989.1563	638.8942	1.2933	3.2363	1768	1.380650925	0.003189304	60.30059452	0.139294373
30.28184832	×ÔÉí³µÁ¾	Road 1	520.2310948	79.52936325	-0.00182112	0.239593819	0	0.011764706	542.562	989.1592	638.8863	1.2932	3.2364	1769	1.038161178	0.002398152	60.31792222	0.1393344
30.29849107	×ÔÉí³µÁ¾	Road 1	520.5987814	79.53445816	-0.00182112	0.184430838	0	0.011764706	542.9822	989.167	638.8648	1.293	3.2367	1770	1.129011094	0.002608016	60.33671207	0.139377805
30.31515801	×ÔÉí³µÁ¾	Road 1	520.9670303	79.54043198	-0.00182112	0.222050086	0	0.011764706	543.5352	989.1787	638.8366	1.2913	3.2384	1771	1.165013695	0.002691182	60.35612929	0.139422659
30.33186344	×ÔÉí³µÁ¾	Road 1	521.3361424	79.54359741	-0.00182112	0.235795602	0	0.011764706	543.69	989.1816	638.8287	1.2912	3.2385	1772	1.048921751	0.002423009	60.37365198	0.139463136
30.34850289	×ÔÉí³µÁ¾	Road 1	521.7038319	79.55084839	-0.00182112	0.230315939	0	0.011764706	544.1545	989.1904	638.805	1.2909	3.2389	1773	1.218296932	0.002814266	60.39392377	0.139509964
30.36522445	×ÔÉí³µÁ¾	Road 1	522.0733563	79.55524979	-0.00182112	0.209042668	0	0.011764706	544.4642	989.1963	638.7892	1.2906	3.2382	1774	1.099723523	0.002540361	60.41231286	0.139552443
30.38184154	×ÔÉí³µÁ¾	Road 1	522.4405919	79.55954819	-0.00182112	0.204540536	0	0.011764706	544.8182	989.2031	638.7711	1.2902	3.2386	1775	1.096643076	0.002533246	60.43053587	0.139594538
30.39855027	×ÔÉí³µÁ¾	Road 1	522.809882	79.56585159	-0.00182112	0.224630266	0	0.011764706	545.2828	989.2129	638.7474	1.2889	3.24	1776	1.178236201	0.002721726	60.4502227	0.139640014
30.41523847	×ÔÉí³µÁ¾	Road 1	523.1787407	79.57068558	-0.00182112	0.227249756	0	0.011764706	545.5926	989.2188	638.7316	1.2887	3.2403	1777	1.11806444	0.002582729	60.46888119	0.139683116
30.43182367	×ÔÉí³µÁ¾	Road 1	523.5453557	79.57780609	-0.00182112	0.214757487	0	0.011764706	546.0794	989.2285	638.7067	1.2877	3.2412	1778	1.214179167	0.002804754	60.48901859	0.139729633
30.44850784	×ÔÉí³µÁ¾	Road 1	523.9141773	79.58189163	-0.001811579	0.211983085	0	0.011764706	546.3893	989.2354	638.6909	1.2866	3.2425	1779	1.087377633	0.002511842	60.50716059	0.139771541
30.46517038	×ÔÉí³µÁ¾	Road 1	524.2825507	79.58833923	-0.001810219	0.219117761	0	0.011764706	546.854	989.2441	638.6672	1.2863	3.2429	1780	1.185155277	0.002737709	60.52690829	0.139817158
30.48188131	×ÔÉí³µÁ¾	Road 1	524.6520139	79.59267883	-0.00180886	0.222356334	0	0.011764706	547.1639	989.25	638.6514	1.2861	3.2421	1781	1.097671415	0.002535621	60.54525139	0.139859531
30.49855082	×ÔÉí³µÁ¾	Road 1	525.0205827	79.59729996	-0.001806143	0.219402075	0	0.011764706	547.4738	989.2568	638.6356	1.2849	3.2434	1782	1.109778227	0.002563588	60.56375085	0.139902264
30.51516644	×ÔÉí³µÁ¾	Road 1	525.3879801	79.60163269	-0.001804785	0.216038153	0	0.011764706	547.7836	989.2627	638.6198	1.2848	3.2436	1783	1.098501518	0.002537539	60.58200314	0.139944427
30.53181432	×ÔÉí³µÁ¾	Road 1	525.7561236	79.60871201	-0.001804785	0.216831177	0	0.011764706	548.2928	989.2734	638.5939	1.2833	3.2452	1784	1.211719777	0.002799073	60.60217571	0.139991026
30.54855348	×ÔÉí³µÁ¾	Road 1	526.1263052	79.61298294	-0.001795302	0.219100535	0	0.011764706	548.6027	989.2793	638.578	1.2831	3.2454	1785	1.094751548	0.002528876	60.62050092	0.140033357
30.5651702	×ÔÉí³µÁ¾	Road 1	526.4938099	79.61960907	-0.001788548	0.21857363	0	0.011764706	549.0677	989.2891	638.5543	1.2817	3.2468	1786	1.193629124	0.002757283	60.64033512	0.140079174
30.58181588	×ÔÉí³µÁ¾	Road 1	526.8619686	79.62252045	-0.001777778	0.21810618	0	0.011764706	549.2227	989.292	638.5464	1.2815	3.2469	1787	1.03963399	0.002401555	60.65764054	0.14011915
30.59862138	×ÔÉí³µÁ¾	Road 1	527.2336893	79.6283638	-0.001765713	0.216191441	0	0.011764706	549.6876	989.3018	638.5227	1.2801	3.2483	1788	1.158594743	0.002676354	60.6771113	0.140164127
30.61516846	×ÔÉí³µÁ¾	Road 1	527.5997133	79.6325798	-0.0017444	0.217331335	0	0.011764706	549.9976	989.3076	638.5068	1.2798	3.2476	1789	1.094700858	0.002528759	60.6952254	0.140205971
30.63184933	×ÔÉí³µÁ¾	Road 1	527.9687301	79.63976212	-0.001727209	0.218100652	0	0.011764706	550.507	989.3184	638.4808	1.2782	3.249	1790	1.215745815	0.002808373	60.7155051	0.140252817
30.64863907	×ÔÉí³µÁ¾	Road 1	528.3401757	79.64412918	-0.0017049	0.217613116	0	0.011764706	550.8171	989.3252	638.4651	1.2769	3.2501	1791	1.098473972	0.002537475	60.73394819	0.14029542
30.66521437	×ÔÉí³µÁ¾	Road 1	528.7069071	79.65061111	-0.001686673	0.217655525	0	0.011764706	551.2822	989.334	638.4413	1.2765	3.2504	1792	1.188675324	0.00274584	60.75365085	0.140340933
30.68180654	×ÔÉí³µÁ¾	Road 1	529.0740301	79.65464172	-0.001667289	0.217646405	0	0.011764706	551.4372	989.3379	638.4334	1.2744	3.2515	1793	1.086753235	0.0025104	60.77168243	0.140382586
30.69852516	×ÔÉí³µÁ¾	Road 1	529.4439729	79.65929718	-0.001651889	0.21761924	0	0.011764706	551.9024	989.3467	638.4097	1.2739	3.2517	1794	1.111261887	0.002567015	60.79026121	0.140425503
30.7151866	×ÔÉí³µÁ¾	Road 1	529.8126808	79.66588898	-0.001639128	0.21689643	0	0.011764706	552.3676	989.3564	638.386	1.2725	3.253	1795	1.191993197	0.002753504	60.81012153	0.140471381
30.7318946	×ÔÉí³µÁ¾	Road 1	530.1824391	79.67022171	-0.001627699	0.216898352	0	0.011764706	552.6777	989.3633	638.3702	1.2713	3.2533	1796	1.098196988	0.002536835	60.8284702	0.140513766
30.74852269	×ÔÉí³µÁ¾	Road 1	530.5504484	79.67444458	-0.001616324	0.21754922	0	0.011764706	552.9879	989.3691	638.3543	1.2711	3.2536	1797	1.094548314	0.002528407	60.84667045	0.140555809
30.76520063	×ÔÉí³µÁ¾	Road 1	530.919583	79.6791893	-0.001607514	0.216841906	0	0.011764706	553.3203	989.376	638.3373	1.2705	3.2545	1798	1.115617479	0.002577076	60.86527665	0.140598789
30.78180892	×ÔÉí³µÁ¾	Road 1	531.287199	79.68413315	-0.001602494	0.217273861	0	0.011764706	553.6748	989.3838	638.3193	1.2694	3.256	1799	1.124745482	0.002598162	60.88395675	0.14064194
30.79862908	×ÔÉí³µÁ¾	Road 1	531.6595392	79.69154205	-0.001591236	0.216790676	0	0.011764706	554.2066	989.3945	638.2922	1.2686	3.2571	1800	1.223162569	0.002825506	60.90453054	0.140689466
30.81518532	×ÔÉí³µÁ¾	Road 1	532.0260564	79.69575806	-0.001581274	0.21746175	0	0.011764706	554.5168	989.4014	638.2763	1.2673	3.2583	1801	1.095234229	0.002529991	60.9226635	0.140731353
30.8318464	×ÔÉí³µÁ¾	Road 1	532.3949251	79.70235672	-0.001565175	0.21755366	0	0.011764706	554.9823	989.4111	638.2526	1.266	3.2595	1802	1.192691357	0.002755117	60.94253503	0.140777256
30.84853313	×ÔÉí³µÁ¾	Road 1	532.7643718	79.70451279	-0.001539399	0.216743857	0	0.011764706	555.1375	989.4141	638.2447	1.2659	3.2596	1803	1.008922123	0.00233061	60.95937064	0.140816146
30.86516049	×ÔÉí³µÁ¾	Road 1	533.1325294	79.71006088	-0.00151029	0.217175066	0	0.011764706	555.5364	989.4229	638.2244	1.2643	3.261	1804	1.149810447	0.002656062	60.97848895	0.140860309
30.88187178	×ÔÉí³µÁ¾	Road 1	533.5025785	79.71714706	-0.001475609	0.217535973	0	0.011764706	556.0462	989.4336	638.1984	1.2627	3.2614	1805	1.212133075	0.002800027	60.99874526	0.140907102
30.89860984	×ÔÉí³µÁ¾	Road 1	533.8732402	79.72146606	-0.00142865	0.217135727	0	0.011764706	556.3566	989.4404	638.1826	1.2615	3.2626	1806	1.097824348	0.002535974	61.0171207	0.140949549
30.91516608	×ÔÉí³µÁ¾	Road 1	534.2398969	79.72606659	-0.001381561	0.216678217	0	0.011764706	556.6891	989.4473	638.1656	1.2607	3.2633	1807	1.1115377	0.002567652	61.03552359	0.140992059
30.93189973	×ÔÉí³µÁ¾	Road 1	534.610504	79.73068771	-0.001335519	0.216645196	0	0.011764706	557.0217	989.4541	638.1486	1.2599	3.2642	1808	1.110403034	0.002565031	61.05410469	0.141034982
30.94849849	×ÔÉí³µÁ¾	Road 1	534.9781568	79.73787003	-0.00128185	0.215939805	0	0.011764706	557.5316	989.4648	638.1226	1.2583	3.2657	1809	1.218341565	0.002814369	61.07432765	0.141081697
30.96514161	×ÔÉí³µÁ¾	Road 1	535.3468114	79.7420723	-0.001240175	0.217049927	0	0.011764706	557.8421	989.4717	638.1068	1.2571	3.2669	1810	1.094211802	0.002527629	61.09253875	0.141123765
30.98181405	×ÔÉí³µÁ¾	Road 1	535.7161369	79.74668655	-0.001193224	0.216583461	0	0.011764706	558.1747	989.4785	638.0898	1.2563	3.2678	1811	1.110980597	0.002566365	61.1110615	0.141166552
30.9985598	×ÔÉí³µÁ¾	Road 1	536.0871164	79.75314102	-0.001145467	0.217409581	0	0.011764706	558.6404	989.4883	638.066	1.2549	3.2691	1812	1.185945618	0.002739534	61.13092105	0.141212428
31.01522161	×ÔÉí³µÁ¾	Road 1	536.4562566	79.75753555	-0.001104862	0.216301247	0	0.011764706	558.9509	989.4951	638.0502	1.2537	3.2693	1813	1.102123532	0.002545905	61.14928443	0.141254847
31.03188452	×ÔÉí³µÁ¾	Road 1	536.8254421	79.76203308	-0.001065228	0.216532081	0	0.011764706	559.2836	989.502	638.0332	1.2529	3.2701	1814	1.106417241	0.002555824	61.16772056	0.141297434
31.04857346	×ÔÉí³µÁ¾	Road 1	537.195234	79.76848755	-0.001024691	0.21649304	0	0.011764706	559.7494	989.5117	638.0095	1.2515	3.2714	1815	1.187020635	0.002742018	61.18753067	0.141343196
31.06512273	×ÔÉí³µÁ¾	Road 1	537.5619512	79.77277908	-0.000992466	0.216933563	0	0.011764706	560.0599	989.5186	637.9937	1.2503	3.2726	1816	1.099222888	0.002539205	61.20572201	0.141385218
31.08182156	×ÔÉí³µÁ¾	Road 1	537.9320023	79.77707748	-0.000955584	0.216856062	0	0.011764706	560.3705	989.5254	637.9778	1.2491	3.2738	1817	1.097948294	0.002536261	61.22405647	0.14142757
31.09855705	×ÔÉí³µÁ¾	Road 1	538.3028971	79.78382034	-0.000914442	0.216888681	0	0.011764706	560.8586	989.5361	637.9529	1.2472	3.2756	1818	1.198329923	0.002768142	61.2441111	0.141473897
31.11511952	×ÔÉí³µÁ¾	Road 1	538.6699768	79.78801575	-0.000873662	0.217046857	0	0.011764706	561.1692	989.542	637.9371	1.2469	3.2758	1819	1.095231212	0.002529984	61.26225084	0.141515799
31.13188324	×ÔÉí³µÁ¾	Road 1	539.0415471	79.79455948	-0.000832491	0.216844484	0	0.011764706	561.6351	989.5527	637.9133	1.2446	3.2781	1820	1.189792568	0.002748421	61.28219618	0.141561873
31.14860846	×ÔÉí³µÁ¾	Road 1	539.4122855	79.7991394	-0.000786377	0.216373339	0	0.011764706	561.968	989.5596	637.8963	1.2438	3.2789	1821	1.109496168	0.002562936	61.30075275	0.141604739
31.16513538	×ÔÉí³µÁ¾	Road 1	539.778648	79.80343781	-0.000745004	0.217205837	0	0.011764706	562.2787	989.5664	637.8805	1.2425	3.2801	1822	1.100058525	0.002541135	61.31893333	0.141646736
31.18183128	×ÔÉí³µÁ¾	Road 1	540.1487861	79.80985794	-0.000702935	0.215885863	0	0.011764706	562.7447	989.5762	637.8567	1.2412	3.2814	1823	1.185951243	0.002739547	61.33873385	0.141692475
31.19853671	×ÔÉí³µÁ¾	Road 1	540.5191555	79.81414261	-0.000654166	0.217163399	0	0.011764706	563.0554	989.583	637.8409	1.24	3.2826	1824	1.097681919	0.002535645	61.3570711	0.141734834
31.21513767	×ÔÉí³µÁ¾	Road 1	540.8872289	79.81853027	-0.000609679	0.216057554	0	0.011764706	563.3661	989.5898	637.8251	1.2388	3.2828	1825	1.10311849	0.002548204	61.37538393	0.141777137
31.23181341	×ÔÉí³µÁ¾	Road 1	541.2569894	79.82482681	-0.000568512	0.217120007	0	0.011764706	563.8323	989.5996	637.8013	1.2374	3.2841	1826	1.181325565	0.002728862	61.3950834	0.141822643
31.24855073	×ÔÉí³µÁ¾	Road 1	541.6281354	79.82911835	-0.000525655	0.216249302	0	0.011764706	564.143	989.6064	637.7854	1.2362	3.2853	1827	1.097777469	0.002535866	61.41345726	0.141865086
31.26512273	×ÔÉí³µÁ¾	Road 1	541.9956352	79.83338928	-0.000490682	0.216239348	0	0.011764706	564.4538	989.6133	637.7695	1.235	3.2865	1828	1.098727248	0.00253806	61.43166537	0.141907147
31.28186995	×ÔÉí³µÁ¾	Road 1	542.36705	79.83972702	-0.000456752	0.216907024	0	0.011764706	564.92	989.623	637.7458	1.2337	3.2878	1829	1.182075403	0.002730594	61.45146184	0.141952877
31.29859627	×ÔÉí³µÁ¾	Road 1	542.7380217	79.84409409	-0.00042494	0.216190547	0	0.011764706	565.2308	989.6299	637.7299	1.2325	3.289	1830	1.101159155	0.002543678	61.46988019	0.141995423
31.31518624	×ÔÉí³µÁ¾	Road 1	543.1059987	79.85052109	-0.000400582	0.216618419	0	0.011764706	565.6971	989.6396	637.7061	1.2312	3.2903	1831	1.188382571	0.002745164	61.48959541	0.142040965
31.33178903	×ÔÉí³µÁ¾	Road 1	543.4742702	79.85264969	-0.000378129	0.215719447	0	0.011764706	565.8525	989.6436	637.6982	1.2301	3.2913	1832	1.00954894	0.002332058	61.50635674	0.142079684
31.34854101	×ÔÉí³µÁ¾	Road 1	543.8458806	79.85905609	-0.000359301	0.216531336	0	0.011764706	566.3189	989.6533	637.6744	1.2288	3.2926	1833	1.185043248	0.00273745	61.52620857	0.142125542
31.3651592	×ÔÉí³µÁ¾	Road 1	544.2145527	79.86546936	-0.0003465	0.216109559	0	0.011764706	566.7852	989.6631	637.6506	1.2276	3.2939	1834	1.18752445	0.002743181	61.54594307	0.142171129
31.38184814	×ÔÉí³µÁ¾	Road 1	544.584814	79.86973343	-0.000334007	0.216489762	0	0.011764706	567.0962	989.6699	637.6348	1.2264	3.2951	1835	1.097560565	0.002535365	61.56426019	0.142213441
31.39861588	×ÔÉí³µÁ¾	Road 1	544.9568441	79.87430649	-0.00032657	0.216289893	0	0.011764706	567.4071	989.6768	637.619	1.2252	3.2963	1836	1.109495061	0.002562934	61.58286392	0.142256416
31.41516589	×ÔÉí³µÁ¾	Road 1	545.3240625	79.87826157	-0.000321817	0.216450214	0	0.011764706	567.7181	989.6836	637.6031	1.224	3.2975	1837	1.086238797	0.002509212	61.60084118	0.142297943
31.43180021	×ÔÉí³µÁ¾	Road 1	545.6931758	79.88352814	-0.000319672	0.216250837	0	0.011764706	568.0957	989.6914	637.5839	1.223	3.2985	1838	1.139880459	0.002633124	61.61980232	0.142341743
31.44852764	×ÔÉí³µÁ¾	Road 1	546.0643791	79.88869171	-0.000319672	0.216168746	0	0.011764706	568.4733	989.7002	637.5646	1.2211	3.3004	1839	1.134467394	0.00262062	61.63877904	0.14238558
31.46509304	×ÔÉí³µÁ¾	Road 1	546.4320109	79.89386215	-0.000319672	0.215749249	0	0.011764706	568.851	989.708	637.5453	1.2202	3.3014	1840	1.13689204	0.002626221	61.65761211	0.142429084
31.48177684	×ÔÉí³µÁ¾	Road 1	546.8022923	79.89864807	-0.000319672	0.21636118	0	0.011764706	569.2065	989.7158	637.5272	1.2188	3.3028	1841	1.119499846	0.002586045	61.67628963	0.142472229
31.49839247	×ÔÉí³µÁ¾	Road 1	547.1710844	79.90380478	-0.000319672	0.215949327	0	0.011764706	569.5842	989.7236	637.5079	1.2179	3.3038	1842	1.13577412	0.002623638	61.69516122	0.142515822
31.51518514	×ÔÉí³µÁ¾	Road 1	547.5438289	79.90867996	-0.000319672	0.216778547	0	0.011764706	569.9397	989.7314	637.4897	1.2165	3.3052	1843	1.121989114	0.002591795	61.71400242	0.142559346
31.53182935	×ÔÉí³µÁ¾	Road 1	547.9133029	79.9140358	-0.000319672	0.21543029	0	0.011764706	570.3174	989.7393	637.4705	1.2155	3.3062	1844	1.143774765	0.00264212	61.73303965	0.142603322
31.54846221	×ÔÉí³µÁ¾	Road 1	548.2825476	79.91899338	-0.000319672	0.216289178	0	0.011764706	570.6953	989.748	637.4512	1.2136	3.3081	1845	1.127442998	0.002604393	61.75179224	0.14264664
31.56511045	×ÔÉí³µÁ¾	Road 1	548.6521564	79.92384796	-0.000319672	0.215868875	0	0.011764706	571.0508	989.7559	637.4331	1.2123	3.3095	1846	1.123030036	0.002594199	61.77048872	0.142689829
31.58184044	×ÔÉí³µÁ¾	Road 1	549.0236046	79.9291214	-0.000319672	0.216056496	0	0.011764706	571.4286	989.7637	637.4139	1.2103	3.3105	1847	1.139392724	0.002631997	61.78955075	0.142733862
31.598459	×ÔÉí³µÁ¾	Road 1	549.392602	79.93418198	-0.000319672	0.216216505	0	0.011764706	571.8065	989.7725	637.3946	1.2084	3.3125	1848	1.132058403	0.002615055	61.80836393	0.142777321
31.61516589	×ÔÉí³µÁ¾	Road 1	549.7635839	79.93913269	-0.000319672	0.215577081	0	0.011764706	572.1622	989.7793	637.3764	1.208	3.3129	1849	1.126455048	0.002602111	61.8271835	0.142820794
31.6318464	×ÔÉí³µÁ¾	Road 1	550.1340041	79.94438553	-0.000319672	0.215697423	0	0.011764706	572.5401	989.7881	637.3572	1.2061	3.3148	1850	1.139345917	0.002631889	61.84618836	0.142864695
31.6485445	×ÔÉí³µÁ¾	Road 1	550.5048379	79.94932938	-0.000319672	0.215757087	0	0.011764706	572.918	989.7959	637.3379	1.2052	3.3158	1851	1.126384234	0.002601948	61.86499684	0.142908143
31.66510294	×ÔÉí³µÁ¾	Road 1	550.8726042	79.95671768	-0.000319672	0.215487599	0	0.011764706	573.4516	989.8076	637.3107	1.2032	3.3179	1852	1.230185439	0.002841728	61.88536679	0.142955197
31.68186812	×ÔÉí³µÁ¾	Road 1	551.2449719	79.95881882	-0.000319672	0.2150383	0	0.011764706	573.6072	989.8115	637.3028	1.2021	3.319	1853	1.008502247	0.00232964	61.90227451	0.142994254
31.69849364	×ÔÉí³µÁ¾	Road 1	551.6142643	79.96457291	-0.000319672	0.215456605	0	0.011764706	574.0297	989.8203	637.2812	1.201	3.3201	1854	1.161110983	0.002682166	61.92157858	0.143038847
31.71509863	×ÔÉí³µÁ¾	Road 1	551.9831241	79.96961975	-0.000319672	0.216076121	0	0.011764706	574.4077	989.8281	637.2619	1.2	3.3211	1855	1.132027647	0.002614984	61.94037589	0.143082268
31.73179673	×ÔÉí³µÁ¾	Road 1	552.354075	79.9745842	-0.000319672	0.215867564	0	0.011764706	574.7635	989.8359	637.2438	1.1987	3.3225	1856	1.127497838	0.00260452	61.95920297	0.143125759
31.74845011	×ÔÉí³µÁ¾	Road 1	552.7240558	79.97961044	-0.000319672	0.215586707	0	0.011764706	575.1416	989.8447	637.2245	1.1967	3.3245	1857	1.130666352	0.002611839	61.97803238	0.143169255
31.76514747	×ÔÉí³µÁ¾	Road 1	553.0950377	79.98476028	-0.000319672	0.216067329	0	0.011764706	575.5197	989.8525	637.2053	1.1958	3.3254	1858	1.135286497	0.002622512	61.99698867	0.143213044
31.78178033	×ÔÉí³µÁ¾	Road 1	553.4646183	79.99170914	-0.000319672	0.215577632	0	0.011764706	576.0313	989.8643	637.1791	1.1934	3.3279	1859	1.210949971	0.002797294	62.01713023	0.143259571
31.79857116	×ÔÉí³µÁ¾	Road 1	553.8377291	79.99594574	-0.000319672	0.215567678	0	0.011764706	576.3427	989.8701	637.1633	1.1932	3.3272	1860	1.09661816	0.002533188	62.03554336	0.143302105
31.81516186	×ÔÉí³µÁ¾	Road 1	554.2064121	80.00017548	-0.000321817	0.215547726	0	0.011764706	576.6541	989.877	637.1473	1.192	3.3284	1861	1.098478455	0.002537485	62.05376789	0.143344204
31.83179251	×ÔÉí³µÁ¾	Road 1	554.5760151	80.0071312	-0.00032354	0.215517819	0	0.011764706	577.1658	989.8887	637.1213	1.1896	3.3308	1862	1.211449248	0.002798448	62.07391508	0.143390744
31.84858262	×ÔÉí³µÁ¾	Road 1	554.9491815	80.01136093	-0.00032657	0.216356993	0	0.011764706	577.4773	989.8955	637.1054	1.1884	3.3321	1863	1.096496525	0.002532907	62.09232537	0.143433272
31.86515865	×ÔÉí³µÁ¾	Road 1	555.3176098	80.01561127	-0.000330931	0.215488404	0	0.011764706	577.7888	989.9023	637.0895	1.1872	3.3333	1864	1.099647741	0.002540186	62.11055317	0.143475378
31.88183403	×ÔÉí³µÁ¾	Road 1	555.6882752	80.02192841	-0.000337545	0.215447143	0	0.011764706	578.256	989.9121	637.0657	1.1859	3.3345	1865	1.184361691	0.002735876	62.13030284	0.143521
31.89858674	×ÔÉí³µÁ¾	Road 1	556.0606795	80.02616501	-0.000347857	0.215897784	0	0.011764706	578.5676	989.9189	637.0498	1.1848	3.3357	1866	1.097316163	0.0025348	62.14868587	0.143563464
31.91511109	×ÔÉí³µÁ¾	Road 1	556.4280369	80.03259888	-0.000359301	0.215133175	0	0.011764706	579.0349	989.9287	637.026	1.1835	3.337	1867	1.191759577	0.002752965	62.16837892	0.143608955
31.93189753	×ÔÉí³µÁ¾	Road 1	556.8012401	80.03671188	-0.000370993	0.215854719	0	0.011764706	579.3465	989.9355	637.0101	1.1823	3.3382	1868	1.091977409	0.002522468	62.18670933	0.143651299
31.94857217	×ÔÉí³µÁ¾	Road 1	557.1719773	80.04094849	-0.000385841	0.215774879	0	0.011764706	579.6581	989.9424	636.9941	1.1811	3.3394	1869	1.098282504	0.002537033	62.2050228	0.143693603
31.96515774	×ÔÉí³µÁ¾	Road 1	557.5407637	80.04737549	-0.000406079	0.214678913	0	0.011764706	580.1255	989.9531	636.9704	1.1789	3.3416	1870	1.190643787	0.002750387	62.2247703	0.143739219
31.98177666	×ÔÉí³µÁ¾	Road 1	557.9103108	80.05149536	-0.00042494	0.215325028	0	0.011764706	580.4371	989.96	636.9545	1.1777	3.3428	1871	1.094118056	0.002527413	62.24295336	0.143781222
31.99856567	×ÔÉí³µÁ¾	Road 1	558.2836638	80.05661087	-0.000447583	0.215085447	0	0.011764706	580.7488	989.9668	636.9385	1.1765	3.3439	1872	1.133457502	0.002618287	62.26198299	0.143825181
32.01510651	×ÔÉí³µÁ¾	Road 1	558.6515237	80.0621315	-0.000467698	0.215013191	0	0.011764706	581.2163	989.9766	636.9147	1.1753	3.3452	1873	1.153622571	0.002664868	62.28106488	0.14386926
32.03177822	×ÔÉí³µÁ¾	Road 1	559.0223129	80.06625137	-0.000490112	0.214863464	0	0.011764706	581.528	989.9834	636.8988	1.1741	3.3464	1874	1.093721369	0.002526496	62.29929908	0.143911381
32.04850564	×ÔÉí³µÁ¾	Road 1	559.3943608	80.07046051	-0.000511473	0.215652764	0	0.011764706	581.8397	989.9902	636.8829	1.1729	3.3476	1875	1.096885952	0.002533807	62.31764716	0.143953765
32.06507875	×ÔÉí³µÁ¾	Road 1	559.7629976	80.07508163	-0.000535858	0.215004638	0	0.011764706	582.1737	989.998	636.8659	1.1712	3.3493	1876	1.115754817	0.002577394	62.33613868	0.14399648
32.08175632	×ÔÉí³µÁ¾	Road 1	560.1339911	80.08220215	-0.000557898	0.215605989	0	0.011764706	582.7081	990.0098	636.8386	1.1692	3.3513	1877	1.218328069	0.002814338	62.35645743	0.144043417
32.09855669	×ÔÉí³µÁ¾	Road 1	560.5077358	80.08639755	-0.000576719	0.215187252	0	0.011764706	583.0199	990.0166	636.8228	1.168	3.3525	1878	1.09572272	0.002531119	62.37486598	0.14408594
32.11514958	×ÔÉí³µÁ¾	Road 1	560.8768881	80.09138947	-0.000597257	0.215144843	0	0.011764706	583.3762	990.0244	636.8046	1.1667	3.3538	1879	1.131156694	0.002612972	62.39363514	0.144129297
32.13183595	×ÔÉí³µÁ¾	Road 1	561.2481385	80.09539948	-0.000615623	0.215155095	0	0.011764706	583.688	990.0313	636.7887	1.1655	3.355	1880	1.08930292	0.00251629	62.41181165	0.144171285
32.14847723	×ÔÉí³µÁ¾	Road 1	561.6184181	80.10240326	-0.000633686	0.214885741	0	0.011764706	584.2003	990.042	636.7626	1.164	3.3564	1881	1.214348913	0.002805146	62.43201998	0.144217966
32.16514271	×ÔÉí³µÁ¾	Road 1	561.9892551	80.1065094	-0.000652098	0.215105474	0	0.011764706	584.5121	990.0488	636.7466	1.1628	3.3576	1882	1.093613995	0.002526248	62.45024557	0.144260067
32.1822081	×ÔÉí³µÁ¾	Road 1	562.3690207	80.11281281	-0.000672268	0.214644119	0	0.011764706	584.98	990.0596	636.7228	1.1606	3.3599	1883	1.17881513	0.002723063	62.47036251	0.144306537
32.19856677	×ÔÉí³µÁ¾	Road 1	562.7330788	80.11710434	-0.000694285	0.215223625	0	0.011764706	585.2919	990.0664	636.7069	1.1594	3.361	1884	1.104764588	0.002552006	62.48843499	0.144348285
32.21515563	×ÔÉí³µÁ¾	Road 1	563.1022793	80.12132034	-0.000718245	0.214807555	0	0.011764706	585.6038	990.0732	636.691	1.1582	3.3622	1885	1.099133935	0.002538999	62.50666837	0.144390404
32.23179875	×ÔÉí³µÁ¾	Road 1	563.472706	80.12539215	-0.000740499	0.215027586	0	0.011764706	585.9157	990.0801	636.675	1.157	3.3634	1886	1.092601941	0.00252391	62.52485267	0.14443241
32.24853643	×ÔÉí³µÁ¾	Road 1	563.8452702	80.13240967	-0.000767038	0.215217635	0	0.011764706	586.4282	990.0908	636.649	1.1555	3.3648	1887	1.21358096	0.002803372	62.54516521	0.144479332
32.26511503	×ÔÉí³µÁ¾	Road 1	564.2143121	80.13648834	-0.000793418	0.214538157	0	0.011764706	586.7401	990.0977	636.6331	1.1543	3.366	1888	1.093657834	0.00252635	62.56329653	0.144521215
32.28180324	×ÔÉí³µÁ¾	Road 1	564.5858133	80.14069061	-0.000822002	0.21536009	0	0.011764706	587.0521	990.1045	636.6171	1.1531	3.3671	1889	1.097709534	0.002535709	62.58161533	0.144563531
32.29853506	×ÔÉí³µÁ¾	Road 1	564.9583165	80.14737167	-0.0008488	0.214259207	0	0.011764706	587.5424	990.1152	636.5922	1.1512	3.369	1890	1.199926552	0.00277183	62.60169229	0.144609909
32.31515765	×ÔÉí³µÁ¾	Road 1	565.3284067	80.15146408	-0.000878692	0.215305448	0	0.011764706	587.8544	990.1221	636.5762	1.15	3.3701	1891	1.093927448	0.002526972	62.61987619	0.144651914
32.3318004	×ÔÉí³µÁ¾	Road 1	565.6989749	80.15775375	-0.000910136	0.214452043	0	0.011764706	588.3224	990.1328	636.5524	1.1477	3.3724	1892	1.185234051	0.002737891	62.63960174	0.14469748
32.34858427	×ÔÉí³µÁ¾	Road 1	566.0727053	80.16203842	-0.000946729	0.215031624	0	0.011764706	588.6345	990.1396	636.5364	1.1465	3.3735	1893	1.100328486	0.002541759	62.65806952	0.144740141
32.36515407	×ÔÉí³µÁ¾	Road 1	566.4416878	80.16613083	-0.00097706	0.215311512	0	0.011764706	588.9466	990.1465	636.5205	1.1453	3.3747	1894	1.094616051	0.002528563	62.67620709	0.144782038
32.38183568	×ÔÉí³µÁ¾	Road 1	566.8131797	80.17040863	-0.001006193	0.214992613	0	0.011764706	589.2587	990.1533	636.5046	1.1441	3.3759	1895	1.101211182	0.002543798	62.69457706	0.144824473
32.39851911	×ÔÉí³µÁ¾	Road 1	567.1847439	80.17717896	-0.001036836	0.214803189	0	0.011764706	589.7715	990.165	636.4785	1.1417	3.3783	1896	1.204770577	0.00278302	62.71467677	0.144870903
32.41510175	×ÔÉí³µÁ¾	Road 1	567.5540823	80.18136749	-0.001062366	0.214787856	0	0.011764706	590.0836	990.1719	636.4626	1.1405	3.3794	1897	1.098651395	0.002537885	62.73289531	0.144912988
32.43183577	×ÔÉí³µÁ¾	Road 1	567.9268179	80.18684692	-0.001084441	0.214528233	0	0.011764706	590.3958	990.1787	636.4467	1.1393	3.3796	1898	1.15057651	0.002657832	62.75214908	0.144957464
32.4485192	×ÔÉí³µÁ¾	Road 1	568.2984499	80.19181137	-0.001101929	0.214698568	0	0.011764706	590.864	990.1895	636.4227	1.137	3.3819	1899	1.129926578	0.00261013	62.77100014	0.14500101
32.46517185	×ÔÉí³µÁ¾	Road 1	568.6694153	80.19599991	-0.001120592	0.21472162	0	0.011764706	591.1762	990.1963	636.4069	1.1358	3.383	1900	1.098061183	0.002536521	62.78928576	0.14504325
32.48175448	×ÔÉí³µÁ¾	Road 1	569.0388408	80.20026398	-0.001133481	0.214929178	0	0.011764706	591.4884	990.2031	636.3909	1.1346	3.3842	1901	1.101996347	0.002545612	62.80755976	0.145085463
32.4985193	×ÔÉí³µÁ¾	Road 1	569.4123465	80.20493317	-0.001146469	0.214687452	0	0.011764706	591.8453	990.2109	636.3727	1.1332	3.3855	1902	1.116854795	0.002579935	62.82628362	0.145128715
32.51517231	×ÔÉí³µÁ¾	Road 1	569.7833932	80.21180649	-0.001158546	0.215068147	0	0.011764706	592.3582	990.2227	636.3466	1.1308	3.3879	1903	1.209962167	0.002795013	62.84643314	0.145175261
32.53174578	×ÔÉí³µÁ¾	Road 1	570.1526869	80.21598129	-0.001169691	0.214645699	0	0.011764706	592.6705	990.2295	636.3306	1.1296	3.3891	1904	1.098518602	0.002537578	62.8646394	0.145217317
32.54853258	×ÔÉí³µÁ¾	Road 1	570.5267535	80.22014923	-0.001182954	0.214639366	0	0.011764706	592.9828	990.2363	636.3147	1.1284	3.3902	1905	1.096057302	0.002531892	62.8830387	0.145259819
32.56509616	×ÔÉí³µÁ¾	Road 1	570.8958765	80.22680969	-0.001196317	0.214361012	0	0.011764706	593.4736	990.2471	636.2897	1.1265	3.3921	1906	1.202768351	0.002778395	62.90296085	0.14530584
32.58181845	×ÔÉí³µÁ¾	Road 1	571.2685553	80.2308609	-0.00120978	0.214139029	0	0.011764706	593.7859	990.2539	636.2737	1.1253	3.3932	1907	1.091988035	0.002522492	62.92122139	0.145348021
32.59855943	×ÔÉí³µÁ¾	Road 1	571.64168	80.23713684	-0.001227537	0.214547545	0	0.011764706	594.2544	990.2646	636.2499	1.1231	3.3954	1908	1.184004281	0.00273505	62.94104279	0.145393809
32.61514757	×ÔÉí³µÁ¾	Road 1	572.0114082	80.2393959	-0.001244407	0.213628337	0	0.011764706	594.4106	990.2686	636.2419	1.122	3.3965	1909	1.018517575	0.002352776	62.95793809	0.145432837
32.63173423	×ÔÉí³µÁ¾	Road 1	572.3811373	80.24665375	-0.001265712	0.214072153	0	0.011764706	594.9684	990.2803	636.2135	1.1205	3.3981	1910	1.227577817	0.002835705	62.97829951	0.145479872
32.64844553	×ÔÉí³µÁ¾	Road 1	572.753664	80.25089035	-0.001288343	0.214252636	0	0.011764706	595.2808	990.2881	636.1976	1.1184	3.4002	1911	1.099989861	0.002540977	62.99668177	0.145522335
32.66506555	×ÔÉí³µÁ¾	Road 1	573.1241754	80.25507202	-0.001316733	0.215082526	0	0.011764706	595.5933	990.2949	636.1816	1.1172	3.4014	1912	1.098704924	0.002538008	63.01494227	0.145564517
32.68174642	×ÔÉí³µÁ¾	Road 1	573.4960717	80.2611969	-0.001339966	0.21445176	0	0.011764706	596.0619	990.3057	636.1578	1.115	3.4026	1913	1.178925521	0.002723318	63.03460777	0.145609944
32.69855265	×ÔÉí³µÁ¾	Road 1	573.8707815	80.26517258	-0.00136685	0.214652419	0	0.011764706	596.3521	990.3115	636.1429	1.1145	3.4032	1914	1.088370165	0.002514135	63.05289918	0.145652197
32.71517011	×ÔÉí³µÁ¾	Road 1	574.2413119	80.27158585	-0.001400958	0.21440199	0	0.011764706	596.8431	990.3232	636.1179	1.1117	3.406	1915	1.192049383	0.002753634	63.072708	0.145697955
32.73180846	×ÔÉí³µÁ¾	Road 1	574.6123285	80.27595978	-0.001434464	0.213903457	0	0.011764706	597.1556	990.3301	636.102	1.1105	3.4072	1916	1.106736498	0.002556561	63.09112227	0.145740492
32.76517973	×ÔÉí³µÁ¾	Road 1	575.3565545	80.28503723	-0.00148155	0.214106128	0	0.011764706	597.8477	990.3457	636.0667	1.1075	3.4102	1917	1.113157628	0.002571394	63.12826976	0.145826303
32.78182541	×ÔÉí³µÁ¾	Road 1	575.7278056	80.29133377	-0.001524798	0.213791549	0	0.011764706	598.3165	990.3564	636.0428	1.1053	3.4125	1918	1.186949289	0.002741853	63.14802734	0.145871943
32.7985587	×ÔÉí³µÁ¾	Road 1	576.1010291	80.29530945	-0.001612545	0.214297622	0	0.011764706	598.629	990.3633	636.0269	1.1042	3.4137	1919	1.089381732	0.002516472	63.16625628	0.145914052
32.81512227	×ÔÉí³µÁ¾	Road 1	576.4704867	80.29953918	-0.001644224	0.213599697	0	0.011764706	598.9417	990.3711	636.0109	1.1021	3.4159	1920	1.101756131	0.002545057	63.1845053	0.145956207
32.83178958	×ÔÉí³µÁ¾	Road 1	576.8422883	80.30605545	-0.001671154	0.214010715	0	0.011764706	599.4329	990.3818	635.9858	1.1004	3.4178	1921	1.195919666	0.002762574	63.20443806	0.146002252
32.881819	×ÔÉí³µÁ¾	Road 1	577.9584462	80.31611481	-0.001689269	0.2139678	0	0.011764706	600.1921	990.3994	635.9471	1.0967	3.4207	1922	1.064232001	0.002458376	63.25768096	0.146125243
32.89857025	×ÔÉí³µÁ¾	Road 1	578.3322015	80.32351685	-0.0017049	0.213943794	0	0.011764706	600.7505	990.4121	635.9187	1.0939	3.4234	1923	1.231456887	0.002844665	63.2783094	0.146172895
32.91514115	×ÔÉí³µÁ¾	Road 1	578.7019573	80.32881088	-0.001716687	0.214322627	0	0.011764706	601.1526	990.4219	635.8982	1.0913	3.4259	1924	1.146553733	0.002648539	63.29730884	0.146216783
32.93174944	×ÔÉí³µÁ¾	Road 1	579.0725694	80.33356247	-0.001716687	0.21346204	0	0.011764706	601.5099	990.4297	635.88	1.0899	3.4273	1925	1.123431071	0.002595126	63.31596711	0.146259884
32.94854578	×ÔÉí³µÁ¾	Road 1	579.4474013	80.33865738	-0.001716687	0.213643357	0	0.011764706	601.8897	990.4385	635.8606	1.088	3.4292	1926	1.135450109	0.00262289	63.33503851	0.146303939
32.96506976	×ÔÉí³µÁ¾	Road 1	579.8161781	80.34359436	-0.001716687	0.213415638	0	0.011764706	602.2695	990.4473	635.8412	1.0861	3.4311	1927	1.132337069	0.002615699	63.35374923	0.146347161
32.98180012	×ÔÉí³µÁ¾	Road 1	580.1895829	80.34840775	-0.001716687	0.214009851	0	0.011764706	602.627	990.4551	635.823	1.0847	3.4325	1928	1.124698584	0.002598054	63.37256584	0.146390627
32.99854111	×ÔÉí³µÁ¾	Road 1	580.563248	80.35333786	-0.001716687	0.213372856	0	0.011764706	603.0068	990.4639	635.8037	1.0828	3.4343	1929	1.129463956	0.002609062	63.39147418	0.146434305
33.01506766	×ÔÉí³µÁ¾	Road 1	580.9321501	80.35843277	-0.001716687	0.213554546	0	0.011764706	603.3867	990.4736	635.7844	1.0799	3.4372	1930	1.139094413	0.002631308	63.41029948	0.146477792
33.03178518	×ÔÉí³µÁ¾	Road 1	581.3053366	80.36305389	-0.001716687	0.213336557	0	0.011764706	603.7441	990.4814	635.7661	1.0776	3.4375	1931	1.117015636	0.002580306	63.42897322	0.146520928
33.04841913	×ÔÉí³µÁ¾	Road 1	581.6766807	80.36806641	-0.001716687	0.213312387	0	0.011764706	604.124	990.4902	635.7468	1.0756	3.4393	1932	1.134372325	0.0026204	63.44784231	0.146564516
33.06507581	×ÔÉí³µÁ¾	Road 1	582.0485634	80.37483673	-0.001716687	0.21372439	0	0.011764706	604.6381	990.502	635.7205	1.0732	3.4414	1933	1.207453911	0.002789219	63.46795448	0.146610975
33.08177794	×ÔÉí³µÁ¾	Road 1	582.42148	80.37894974	-0.001716687	0.213676468	0	0.011764706	604.951	990.5098	635.7046	1.0711	3.4433	1934	1.096223027	0.002532275	63.48626374	0.146653269
33.09847458	×ÔÉí³µÁ¾	Road 1	582.7943025	80.38513641	-0.001716687	0.213688672	0	0.011764706	605.4203	990.5205	635.6807	1.0688	3.4455	1935	1.182612987	0.002731836	63.5060094	0.146698882
33.11506271	×ÔÉí³µÁ¾	Road 1	583.1647217	80.38933868	-0.001716687	0.212991312	0	0.011764706	605.7333	990.5283	635.6647	1.0666	3.4476	1936	1.101239868	0.002543864	63.52427691	0.14674108
33.13173442	×ÔÉí³µÁ¾	Road 1	583.5370257	80.39336243	-0.001716687	0.214906976	0	0.011764706	606.0462	990.5352	635.6487	1.0655	3.4488	1937	1.092958316	0.002524734	63.54249839	0.146783171
33.14843875	×ÔÉí³µÁ¾	Road 1	583.9100774	80.3974823	-0.001716687	0.213191047	0	0.011764706	606.3592	990.543	635.6329	1.0633	3.4509	1938	1.096669669	0.002533307	63.56081752	0.146825488
33.16507123	×ÔÉí³µÁ¾	Road 1	584.2815571	80.40452728	-0.001716687	0.214012578	0	0.011764706	606.8958	990.5557	635.6055	1.0604	3.453	1939	1.21967331	0.002817445	63.58110372	0.14687235
33.1817565	×ÔÉí³µÁ¾	Road 1	584.6542254	80.40658722	-0.001716687	0.213564336	0	0.011764706	607.0522	990.5586	635.5975	1.0603	3.4531	1940	1.011171216	0.002335806	63.59797539	0.146911323
33.19841941	×ÔÉí³µÁ¾	Road 1	585.0264199	80.41214905	-0.001716687	0.213576645	0	0.011764706	607.4771	990.5693	635.5759	1.0573	3.4561	1941	1.157373586	0.002673533	63.6172606	0.146955872
33.21512851	×ÔÉí³µÁ¾	Road 1	585.3996697	80.41723709	-0.001716687	0.213269293	0	0.011764706	607.8572	990.5781	635.5565	1.0554	3.458	1942	1.137082317	0.00262666	63.63626021	0.146999761
33.23177969	×ÔÉí³µÁ¾	Road 1	585.7716565	80.42387695	-0.001716687	0.213541389	0	0.011764706	608.3715	990.5898	635.5303	1.053	3.4604	1943	1.202655811	0.002778135	63.65628585	0.14704602
33.24841657	×ÔÉí³µÁ¾	Road 1	586.1433433	80.42807922	-0.001716687	0.213662997	0	0.011764706	608.6846	990.5977	635.5143	1.0509	3.4626	1944	1.101110037	0.002543564	63.67460489	0.147088337
33.26524406	×ÔÉí³µÁ¾	Road 1	586.5193073	80.43208237	-0.001716687	0.213045552	0	0.011764706	608.9977	990.6055	635.4984	1.0488	3.4647	1945	1.090936305	0.002520063	63.69296262	0.147130744
33.28171746	×ÔÉí³µÁ¾	Road 1	586.88739	80.43861923	-0.001716687	0.213617548	0	0.011764706	609.4897	990.6172	635.4733	1.046	3.4676	1946	1.201466735	0.002775388	63.71275486	0.147176464
33.29839613	×ÔÉí³µÁ¾	Road 1	587.2600778	80.44262238	-0.001716687	0.213009566	0	0.011764706	609.8029	990.624	635.4573	1.0449	3.4687	1947	1.092515574	0.002523711	63.73097657	0.147218556
33.31512392	×ÔÉí³µÁ¾	Road 1	587.6338826	80.44681778	-0.001716687	0.213191062	0	0.011764706	610.116	990.6318	635.4413	1.0427	3.4699	1948	1.100057044	0.002541132	63.74937809	0.147261063
33.33179636	×ÔÉí³µÁ¾	Road 1	588.0064706	80.45112991	-0.001716687	0.213362709	0	0.011764706	610.4516	990.6396	635.4242	1.041	3.4716	1949	1.105546291	0.002553812	63.76781024	0.147303642
33.34843728	×ÔÉí³µÁ¾	Road 1	588.3783775	80.45619736	-0.001716687	0.213168174	0	0.011764706	610.8319	990.6494	635.4048	1.0382	3.4745	1950	1.137494653	0.002627613	63.7867392	0.147347368
33.3650672	×ÔÉí³µÁ¾	Road 1	588.7500692	80.46283035	-0.001716687	0.213317975	0	0.011764706	611.3464	990.6611	635.3787	1.0358	3.4768	1951	1.203160404	0.002779301	63.80674766	0.147393587
33.38171581	×ÔÉí³µÁ¾	Road 1	589.1221982	80.46702576	-0.001716687	0.213559121	0	0.011764706	611.6597	990.6689	635.3627	1.0337	3.479	1952	1.10108743	0.002543512	63.82507924	0.147435933
33.39838459	×ÔÉí³µÁ¾	Road 1	589.4947968	80.4711113	-0.001716687	0.213044643	0	0.011764706	611.973	990.6768	635.3467	1.0315	3.4811	1953	1.096332838	0.002532529	63.84335376	0.147478147
33.41503467	×ÔÉí³µÁ¾	Road 1	589.8669978	80.47549896	-0.001716687	0.213932231	0	0.011764706	612.3086	990.6846	635.3296	1.0298	3.4828	1954	1.109186579	0.002562221	63.86182181	0.147520808
33.43170931	×ÔÉí³µÁ¾	Road 1	590.2397707	80.48045654	-0.001716687	0.212609202	0	0.011764706	612.689	990.6934	635.3102	1.0279	3.4847	1955	1.132736668	0.002616622	63.88070978	0.14756444
33.44843416	×ÔÉí³µÁ¾	Road 1	590.6136895	80.48544159	-0.001716687	0.213027984	0	0.011764706	613.0695	990.7031	635.2909	1.0251	3.4875	1956	1.133309516	0.002617945	63.89966422	0.147608224
33.46506298	×ÔÉí³µÁ¾	Road 1	590.9854825	80.49008331	-0.001716687	0.21257022	0	0.011764706	613.4276	990.7119	635.2726	1.0228	3.4888	1957	1.120194413	0.002587649	63.91829173	0.147651254
33.48170976	×ÔÉí³µÁ¾	Road 1	591.3577002	80.49506149	-0.001716687	0.213401526	0	0.011764706	613.808	990.7207	635.2532	1.0209	3.4907	1958	1.134094645	0.002619759	63.93717076	0.147694864
33.49844708	×ÔÉí³µÁ¾	Road 1	591.7319653	80.49999847	-0.001716687	0.212967739	0	0.011764706	614.1885	990.7305	635.2339	1.0181	3.4935	1959	1.131308153	0.002613322	63.95610582	0.147738604
33.5150748	×ÔÉí³µÁ¾	Road 1	592.1038011	80.50465393	-0.001716687	0.212965891	0	0.011764706	614.5467	990.7383	635.2156	1.0168	3.4949	1960	1.120930296	0.002589349	63.97474434	0.147781659
33.53173075	×ÔÉí³µÁ¾	Road 1	592.4762963	80.51076508	-0.001716687	0.21291855	0	0.011764706	615.0168	990.75	635.1917	1.0136	3.498	1961	1.181467207	0.002729189	63.99442279	0.147827117
33.54840209	×ÔÉí³µÁ¾	Road 1	592.8491565	80.51522827	-0.001716687	0.212680593	0	0.011764706	615.3526	990.7588	635.1745	1.0109	3.5007	1962	1.112504495	0.002569885	64.01296973	0.14786996
33.56508003	×ÔÉí³µÁ¾	Road 1	593.2221828	80.51921082	-0.001714063	0.212855592	0	0.011764706	615.666	990.7656	635.1586	1.0098	3.5019	1963	1.09241805	0.002523486	64.03118901	0.147912047
33.581751	×ÔÉí³µÁ¾	Road 1	593.5950762	80.52416153	-0.001714063	0.212887719	0	0.011764706	616.0466	990.7754	635.1391	1.0069	3.5047	1964	1.132947775	0.002617109	64.05007636	0.147955676
33.59842747	×ÔÉí³µÁ¾	Road 1	593.9681154	80.52910538	-0.001714063	0.213246018	0	0.011764706	616.4273	990.7852	635.1198	1.0041	3.5066	1965	1.132644249	0.002616408	64.06896487	0.147999309
33.61503283	×ÔÉí³µÁ¾	Road 1	594.3395855	80.53376083	-0.001714063	0.213251367	0	0.011764706	616.7856	990.7939	635.1014	1.0018	3.5089	1966	1.12148949	0.002590641	64.0875876	0.148042327
33.63170088	×ÔÉí³µÁ¾	Road 1	594.71249	80.54074402	-0.001714063	0.213200003	0	0.011764706	617.323	990.8066	635.0741	0.9979	3.5118	1967	1.218022154	0.002813631	64.10788965	0.148089225
33.64845213	×ÔÉí³µÁ¾	Road 1	595.0872746	80.54470596	-0.001714063	0.213032857	0	0.011764706	617.6365	990.8145	635.0581	0.9958	3.5139	1968	1.091085621	0.002520408	64.12616669	0.148131445
33.66505822	×ÔÉí³µÁ¾	Road 1	595.4588308	80.54888077	-0.001714063	0.213564053	0	0.011764706	617.9501	990.8223	635.0421	0.9936	3.516	1969	1.101488038	0.002544437	64.14445811	0.148173698
33.68174019	×ÔÉí³µÁ¾	Road 1	595.8321143	80.55527344	-0.001714063	0.212751061	0	0.011764706	618.4428	990.834	635.017	0.9909	3.5188	1970	1.193303457	0.002756531	64.16436476	0.148219683
33.69841959	×ÔÉí³µÁ¾	Road 1	596.2053592	80.55933838	-0.001714063	0.212719679	0	0.011764706	618.7564	990.8418	635.0011	0.9888	3.5209	1971	1.096237414	0.002532308	64.18264935	0.14826192
33.71505574	×ÔÉí³µÁ¾	Road 1	596.577655	80.56339645	-0.001714063	0.212671041	0	0.011764706	619.07	990.8496	634.985	0.9866	3.523	1972	1.096431322	0.002532756	64.20088974	0.148304055
33.73178463	×ÔÉí³µÁ¾	Road 1	596.9520469	80.56784592	-0.001714063	0.212453067	0	0.011764706	619.4061	990.8584	634.968	0.984	3.5257	1973	1.111822714	0.00256831	64.2194893	0.14834702
33.74853038	×ÔÉí³µÁ¾	Road 1	597.326839	80.57276917	-0.001714063	0.211986229	0	0.011764706	619.7869	990.8682	634.9486	0.9811	3.5276	1974	1.13138525	0.0026135	64.2384352	0.148390785
33.76504117	×ÔÉí³µÁ¾	Road 1	597.696393	80.57729416	-0.001714063	0.213506043	0	0.011764706	620.1454	990.877	634.9303	0.9788	3.5299	1975	1.117549773	0.00258154	64.25688683	0.148433409
33.78168905	×ÔÉí³µÁ¾	Road 1	598.0690384	80.58223114	-0.001711442	0.212189808	0	0.011764706	620.5262	990.8857	634.9109	0.977	3.5318	1976	1.133260895	0.002617833	64.27575322	0.14847699
33.79847623	×ÔÉí³µÁ¾	Road 1	598.4448246	80.58714752	-0.001710132	0.21306105	0	0.011764706	620.9072	990.8955	634.8915	0.9741	3.5347	1977	1.13074358	0.002612018	64.29473521	0.148520838
33.8151351	×ÔÉí³µÁ¾	Road 1	598.8177701	80.59389725	-0.0017049	0.211904705	0	0.011764706	621.4225	990.9082	634.8652	0.9708	3.538	1978	1.209028657	0.002792856	64.31487627	0.148567364
33.83175806	×ÔÉí³µÁ¾	Road 1	599.1899298	80.59786606	-0.001694469	0.212575689	0	0.011764706	621.7363	990.916	634.8492	0.9687	3.5402	1979	1.093166861	0.002525215	64.33304793	0.148609341
33.84847082	×ÔÉí³µÁ¾	Road 1	599.5641201	80.60219879	-0.001682784	0.212108374	0	0.011764706	622.0724	990.9248	634.8322	0.966	3.5429	1980	1.1074828	0.002558285	64.35155703	0.148652097
33.86504392	×ÔÉí³µÁ¾	Road 1	599.9352023	80.60625	-0.00165573	0.213392481	0	0.011764706	622.3862	990.9326	634.8161	0.9639	3.545	1981	1.097212773	0.002534562	64.36974125	0.148694102
33.881705	×ÔÉí³µÁ¾	Road 1	600.3082872	80.61338425	-0.001627699	0.21202296	0	0.011764706	622.9241	990.9463	634.7887	0.96	3.548	1982	1.225288023	0.002830415	64.39015586	0.14874126
33.89847898	×ÔÉí³µÁ¾	Road 1	600.6839187	80.61733932	-0.001591236	0.212256894	0	0.011764706	623.238	990.9541	634.7728	0.9579	3.5502	1983	1.091290581	0.002520881	64.40846115	0.148783545
33.91510156	×ÔÉí³µÁ¾	Road 1	601.0561791	80.62147293	-0.00154551	0.211952716	0	0.011764706	623.5518	990.9619	634.7567	0.9558	3.5523	1984	1.100309809	0.002541716	64.42675114	0.148825795
33.9317784	×ÔÉí³µÁ¾	Road 1	601.4296834	80.62772827	-0.001495874	0.212220803	0	0.011764706	624.045	990.9746	634.7316	0.952	3.5561	1985	1.188451741	0.002745324	64.44657076	0.148871578
33.94856557	×ÔÉí³µÁ¾	Road 1	601.8056777	80.63175888	-0.00144497	0.212585419	0	0.011764706	624.3588	990.9824	634.7156	0.9499	3.5582	1986	1.094438022	0.002528152	64.46494328	0.148914019
33.96507783	×ÔÉí³µÁ¾	Road 1	602.1755417	80.63771896	-0.001390667	0.211965367	0	0.011764706	624.8297	990.9941	634.6917	0.9467	3.5614	1987	1.178707242	0.002722814	64.48440639	0.148958979
33.98171691	×ÔÉí³µÁ¾	Road 1	602.5482564	80.6398407	-0.001327762	0.212575525	0	0.011764706	624.9866	990.998	634.6837	0.9457	3.5625	1988	1.016061283	0.002347102	64.50131272	0.148998032
33.99854734	×ÔÉí³µÁ¾	Road 1	602.9252913	80.64712601	-0.001280769	0.211459175	0	0.011764706	625.5472	991.0127	634.6551	0.9412	3.567	1989	1.228927539	0.002838823	64.5219961	0.149045811
34.01502954	×ÔÉí³µÁ¾	Road 1	603.2945428	80.65098495	-0.001213942	0.213160113	0	0.011764706	625.8611	991.0205	634.6392	0.9391	3.5692	1990	1.090465126	0.002518974	64.53996936	0.149087329
34.03174156	×ÔÉí³µÁ¾	Road 1	603.6689623	80.65510483	-0.001145467	0.211665198	0	0.011764706	626.1751	991.0283	634.6231	0.937	3.5703	1991	1.099143319	0.002539021	64.55833827	0.149129761
34.04846019	×ÔÉí³µÁ¾	Road 1	604.0435597	80.66155243	-0.00108928	0.211858287	0	0.011764706	626.6685	991.041	634.598	0.9333	3.5741	1992	1.19618655	0.002763191	64.57833687	0.149175958
34.06508168	×ÔÉí³µÁ¾	Road 1	604.4159981	80.66537018	-0.001025622	0.212304205	0	0.011764706	626.9825	991.0488	634.582	0.9312	3.5762	1993	1.087510596	0.002512149	64.59641291	0.149217714
34.08174642	×ÔÉí³µÁ¾	Road 1	604.789425	80.66951065	-0.000962707	0.211611986	0	0.011764706	627.2965	991.0576	634.566	0.9281	3.5794	1994	1.100635392	0.002542468	64.61475472	0.149260083
34.09848154	×ÔÉí³µÁ¾	Road 1	605.1644587	80.67592392	-0.000907559	0.21218285	0	0.011764706	627.79	991.0693	634.5408	0.9253	3.5822	1995	1.194651019	0.002759644	64.63474735	0.149306266
34.11504438	×ÔÉí³µÁ¾	Road 1	605.5356496	80.67985153	-0.000852087	0.211571306	0	0.011764706	628.104	991.0781	634.5248	0.9222	3.5853	1996	1.092843645	0.002524469	64.65284794	0.149348079
34.13168346	×ÔÉí³µÁ¾	Road 1	605.9085679	80.68386841	-0.000791066	0.212392792	0	0.011764706	628.4181	991.0859	634.5089	0.9201	3.5874	1997	1.095865948	0.00253145	64.67108215	0.1493902
[truncated: 2,108 more rows]
