# Supplementary material for: Influence of Landscape Design on Driving Behavior Based on Slope Illusion
Source: Hindawi journal article supplement (doi:10.1155/2022/6407145), 2022-01-12
Supplement: f1 [file 6407145.f1.zip › 8.txt]

CO2 emission report
0.3	0.028	0.056	0.00231
Time(s)	Vehicle Name	Road Name	Travelled Distance (m)	Speed(km/h)	Steering Wheel Angle(-1..1)	Acceleration(m/s^2)	Accelerate (0..1)	Brake (0..1)	X Pos(m)	Y Pos(m)	Z Pos(m)	Distance to the left border(m)	Distance to the right border(m)	Measurement Point Number	Gasoline Consumption(cc/sec)	Carbon Dioxide Emission(kg/sec)	Progressive Gasoline Consumption(cc)	Progressive Carbon Dioxide Emission(kg)
0	×ÔÉí³µÁ¾	Road 1	0	7.623703194	0	0.607841253	0	0	21.0064	977.1602	655.7373	3.832	0.7021	1	0	0	0	0
0.016595097	×ÔÉí³µÁ¾	Road 1	0.035320578	7.662147617	0	0.606157899	0	0	21.051	977.1611	655.7373	3.8318	0.7023	2	0.512606735	0.001184122	0.008506758	1.97E-05
0.066564764	×ÔÉí³µÁ¾	Road 1	0.142560567	7.725966167	0	0.603637397	0	0	21.1258	977.1621	655.7373	3.8322	0.7019	3	0.445010633	0.001027975	0.030743792	7.10E-05
0.133005266	×ÔÉí³µÁ¾	Road 1	0.287320061	7.843622017	0	0.599006712	0	0	21.2664	977.165	655.7373	3.8318	0.7023	4	0.480141334	0.001109126	0.062644623	0.000144709
0.183976731	×ÔÉí³µÁ¾	Road 1	0.400073944	7.963553238	0	0.592276812	0	0	21.4135	977.168	655.7373	3.8315	0.7026	5	0.522648573	0.001207318	0.089284786	0.000206248
0.216268128	×ÔÉí³µÁ¾	Road 1	0.471966777	8.014958096	0	0.58932507	0	0	21.4778	977.1689	655.7373	3.8317	0.7024	6	0.472248425	0.001090894	0.104534348	0.000241474
0.23295743	×ÔÉí³µÁ¾	Road 1	0.509295297	8.052024937	0	0.588485003	0	0	21.5247	977.1699	655.7373	3.8316	0.7025	7	0.516819903	0.001193854	0.113159711	0.000261399
0.24968522	×ÔÉí³µÁ¾	Road 1	0.546791685	8.069625378	0	0.587206066	0	0	21.5404	977.1699	655.7373	3.8319	0.7023	8	0.436059286	0.001007297	0.120454019	0.000278249
0.266217635	×ÔÉí³µÁ¾	Road 1	0.583987192	8.099471283	0	0.585124493	0	0	21.5853	977.1709	655.7373	3.8317	0.7024	9	0.489125549	0.00112988	0.128540446	0.000296928
0.282982447	×ÔÉí³µÁ¾	Road 1	0.621819681	8.123977661	0	0.584275603	0	0	21.6168	977.1709	655.7373	3.8323	0.7019	10	0.465658833	0.001075672	0.136347129	0.000314962
0.299617499	×ÔÉí³µÁ¾	Road 1	0.659496447	8.153648472	0	0.582597077	0	0	21.6552	977.1719	655.7373	3.832	0.7021	11	0.488869779	0.001129289	0.144479503	0.000333748
0.316222859	×ÔÉí³µÁ¾	Road 1	0.697298482	8.195385361	0	0.580474973	0	0	21.7097	977.1729	655.7373	3.832	0.7021	12	0.541302604	0.001250409	0.153468027	0.000354511
0.332875871	×ÔÉí³µÁ¾	Road 1	0.735321196	8.219640255	0	0.579226553	0	0	21.7416	977.1738	655.7373	3.8316	0.7025	13	0.467237873	0.001079319	0.161248945	0.000372485
0.349556742	×ÔÉí³µÁ¾	Road 1	0.773519586	8.243826485	0	0.577536285	0	0	21.7736	977.1738	655.7373	3.8322	0.7019	14	0.467264979	0.001079382	0.169043332	0.00039049
0.366279034	×ÔÉí³µÁ¾	Road 1	0.81193283	8.269660664	0	0.576264203	0	0	21.808	977.1748	655.7373	3.8319	0.7023	15	0.474554883	0.001096222	0.176978977	0.000408821
0.382879995	×ÔÉí³µÁ¾	Road 1	0.850241529	8.3074296	0	0.574144006	0	0	21.8587	977.1758	655.7373	3.8318	0.7024	16	0.527577777	0.001218705	0.185737276	0.000429053
0.400170449	×ÔÉí³µÁ¾	Road 1	0.890264524	8.333082676	0	0.572883666	0	0	21.8934	977.1758	655.7373	3.8324	0.7017	17	0.47149281	0.001089148	0.1938896	0.000447885
0.416285357	×ÔÉí³µÁ¾	Road 1	0.92768092	8.358659363	0	0.571193397	0	0	21.9281	977.1768	655.7373	3.8321	0.7021	18	0.479484289	0.001107609	0.201616445	0.000465734
0.432863592	×ÔÉí³µÁ¾	Road 1	0.966337372	8.394333172	0	0.569514871	0	0	21.977	977.1777	655.7373	3.832	0.7022	19	0.52106026	0.001203649	0.210254705	0.000485688
0.449598713	×ÔÉí³µÁ¾	Road 1	1.00546982	8.4180336	0	0.568254709	0	0	22.0097	977.1787	655.7373	3.8316	0.7026	20	0.468355551	0.001081901	0.218092692	0.000503794
0.466209205	×ÔÉí³µÁ¾	Road 1	1.044419895	8.441668797	0	0.566981435	0	0	22.0425	977.1787	655.7373	3.8322	0.702	21	0.469317054	0.001084122	0.225888279	0.000521802
0.482929297	×ÔÉí³µÁ¾	Road 1	1.083791065	8.476999283	0	0.565722525	0	0	22.0918	977.1797	655.7373	3.8321	0.7021	22	0.520407906	0.001202142	0.234589547	0.000541902
0.516426297	×ÔÉí³µÁ¾	Road 1	1.163227725	8.537241268	0	0.561493695	0	0	22.1769	977.1816	655.7373	3.8317	0.7025	23	0.498618268	0.001151808	0.251291763	0.000580484
0.532945517	×ÔÉí³µÁ¾	Road 1	1.202509326	8.56055975	0	0.560663462	0	0	22.2101	977.1816	655.7373	3.8323	0.7019	24	0.470870056	0.00108771	0.259070169	0.000598452
0.54957397	×ÔÉí³µÁ¾	Road 1	1.242173456	8.587140656	0	0.55896008	0	0	22.2482	977.1826	655.7373	3.8321	0.7022	25	0.485231174	0.001120884	0.267138813	0.000617091
0.566535623	×ÔÉí³µÁ¾	Road 1	1.28274164	8.610332108	0	0.558121204	0	0	22.2817	977.1836	655.7373	3.8317	0.7025	26	0.46857246	0.001082402	0.275086576	0.00063545
0.582868265	×ÔÉí³µÁ¾	Road 1	1.321910354	8.633469486	0	0.557271183	0	0	22.3152	977.1836	655.7373	3.8323	0.7019	27	0.472702976	0.001091944	0.282807065	0.000653284
0.599595689	×ÔÉí³µÁ¾	Road 1	1.362201798	8.671341419	0	0.554740667	0	0	22.3705	977.1846	655.7373	3.8323	0.7019	28	0.536736496	0.001239861	0.291785284	0.000674024
0.616241003	×ÔÉí³µÁ¾	Road 1	1.402401669	8.69431057	0	0.553899288	0	0	22.4042	977.1855	655.7373	3.832	0.7023	29	0.471166917	0.001088396	0.299628005	0.000692141
0.632938369	×ÔÉí³µÁ¾	Road 1	1.442833448	8.717207623	0	0.55220902	0	0	22.4381	977.1865	655.7373	3.8316	0.7026	30	0.470969996	0.001087941	0.307491964	0.000710306
0.64957452	×ÔÉí³µÁ¾	Road 1	1.483267637	8.74980526	0	0.550520122	0	0	22.4769	977.1865	655.7373	3.8323	0.7019	31	0.515942723	0.001191828	0.316075265	0.000730134
0.666261256	×ÔÉí³µÁ¾	Road 1	1.523952718	8.777408409	0	0.548831582	0	0	22.528	977.1875	655.7373	3.8323	0.702	32	0.49354914	0.001140099	0.324310989	0.000749158
0.682876513	×ÔÉí³µÁ¾	Road 1	1.564568116	8.800070286	0	0.547569513	0	0	22.5622	977.1885	655.7373	3.8319	0.7023	33	0.472037514	0.001090407	0.332154013	0.000767276
0.699546387	×ÔÉí³µÁ¾	Road 1	1.605421645	8.822664356	0	0.546291113	0	0	22.5964	977.1895	655.7373	3.8315	0.7027	34	0.471829941	0.001089927	0.340019359	0.000785445
0.716193168	×ÔÉí³µÁ¾	Road 1	1.646352513	8.85162878	0	0.544600844	0	0	22.6406	977.1895	655.7373	3.8323	0.7019	35	0.50172603	0.001158987	0.348371482	0.000804738
0.732905929	×ÔÉí³µÁ¾	Road 1	1.687564745	8.87729044	0	0.543340683	0	0	22.68	977.1904	655.7373	3.8321	0.7022	36	0.486671182	0.00112421	0.356505101	0.000823527
0.749604761	×ÔÉí³µÁ¾	Road 1	1.728913092	8.914039707	0	0.541208565	0	0	22.7368	977.1914	655.7373	3.8321	0.7021	37	0.538513374	0.001243966	0.365497646	0.0008443
0.766256307	×ÔÉí³µÁ¾	Road 1	1.77024746	8.936330795	0	0.54037714	0	0	22.7715	977.1924	655.7373	3.8318	0.7025	38	0.472758813	0.001092073	0.373369811	0.000862484
0.782881828	×ÔÉí³µÁ¾	Road 1	1.811619904	8.958564377	0	0.539108157	0	0	22.8063	977.1924	655.7373	3.8324	0.7018	39	0.47308387	0.001092824	0.381235077	0.000880653
0.799542171	×ÔÉí³µÁ¾	Road 1	1.853196282	8.983905888	0	0.537836611	0	0	22.8462	977.1934	655.7373	3.8322	0.7021	40	0.487801975	0.001126823	0.389362025	0.000899426
0.816252	×ÔÉí³µÁ¾	Road 1	1.89502076	9.01075201	0	0.536569595	0	0	22.8887	977.1943	655.7373	3.832	0.7023	41	0.49500484	0.001143461	0.397633471	0.000918533
0.832856994	×ÔÉí³µÁ¾	Road 1	1.93669904	9.035945034	0	0.535287559	0	0	22.9288	977.1953	655.7373	3.8317	0.7026	42	0.488589813	0.001128642	0.405746502	0.000937274
0.849608243	×ÔÉí³µÁ¾	Road 1	1.97891236	9.072036839	0	0.533589005	0	0	22.9866	977.1963	655.7373	3.8318	0.7025	43	0.539143553	0.001245422	0.41477783	0.000958137
0.866251359	×ÔÉí³µÁ¾	Road 1	2.020954418	9.093934822	0	0.532315731	0	0	23.0219	977.1963	655.7373	3.8324	0.7019	44	0.474009398	0.001094962	0.422666823	0.00097636
0.882866249	×ÔÉí³µÁ¾	Road 1	2.063025972	9.115774441	0	0.531478822	0	0	23.0573	977.1973	655.7373	3.8321	0.7022	45	0.47432739	0.001095696	0.430547721	0.000994565
0.899513763	×ÔÉí³µÁ¾	Road 1	2.105288014	9.139103222	0	0.529795408	0	0	23.0954	977.1982	655.7373	3.8318	0.7025	46	0.481618134	0.001112538	0.438565466	0.001013086
0.916259881	×ÔÉí³µÁ¾	Road 1	2.147930173	9.167006779	0	0.528088093	0	0	23.1411	977.1992	655.7373	3.8317	0.7026	47	0.503101706	0.001162165	0.446990466	0.001032548
0.932854244	×ÔÉí³µÁ¾	Road 1	2.190292754	9.190186214	0	0.527244925	0	0	23.1794	977.1992	655.7373	3.8324	0.7019	48	0.482277134	0.00111406	0.454993548	0.001051035
0.949523385	×ÔÉí³µÁ¾	Road 1	2.232967522	9.216381741	0	0.525965989	0	0	23.2228	977.2002	655.7373	3.8322	0.7021	49	0.496671381	0.001147311	0.463272633	0.00107016
0.966183362	×ÔÉí³µÁ¾	Road 1	2.275746531	9.243976307	0	0.523394287	0	0	23.269	977.2012	655.7373	3.832	0.7023	50	0.504018736	0.001164283	0.471669574	0.001089557
0.982859834	×ÔÉí³µÁ¾	Road 1	2.318730192	9.279011536	0	0.52045387	0	0	23.3281	977.2021	655.7373	3.8321	0.7022	51	0.540319305	0.001248138	0.480680194	0.001110371
0.999594222	×ÔÉí³µÁ¾	Road 1	2.36196165	9.300205708	0	0.517904758	0	0	23.3643	977.2031	655.7373	3.8318	0.7025	52	0.474010607	0.001094965	0.488612471	0.001128695
1.016215344	×ÔÉí³µÁ¾	Road 1	2.404997927	9.321308041	0	0.516234338	0	0	23.4005	977.2031	655.7373	3.8325	0.7018	53	0.474656065	0.001096456	0.496501788	0.001146919
1.032875321	×ÔÉí³µÁ¾	Road 1	2.448238993	9.343820572	0	0.514535964	0	0	23.4394	977.2041	655.7373	3.8322	0.7021	54	0.481658461	0.001112631	0.504526206	0.001165456
1.049581485	×ÔÉí³µÁ¾	Road 1	2.491710871	9.367726135	0	0.512845695	0	0	23.4809	977.2051	655.7373	3.832	0.7023	55	0.488555196	0.001128563	0.512688089	0.001184309
1.066187578	×ÔÉí³µÁ¾	Road 1	2.535093643	9.404859924	0	0.50944519	0	0	23.5461	977.2061	655.7373	3.8322	0.7021	56	0.554537065	0.001280981	0.521896783	0.001205582
1.082923065	×ÔÉí³µÁ¾	Road 1	2.578910526	9.425526237	0	0.507764935	0	0	23.5827	977.207	655.7373	3.8319	0.7025	57	0.473786701	0.001094447	0.529825835	0.001223898
1.099616399	×ÔÉí³µÁ¾	Road 1	2.622712458	9.446103287	0	0.506074667	0	0	23.6194	977.207	655.7373	3.8326	0.7018	58	0.473985057	0.001094905	0.537738226	0.001242175
1.116317797	×ÔÉí³µÁ¾	Road 1	2.666666889	9.474413681	0.053688787	0.392122149	0	0.011764706	23.6772	977.208	655.7373	3.8326	0.7017	59	0.512272617	0.00118335	0.546293894	0.001261939
1.132932321	×ÔÉí³µÁ¾	Road 1	2.710460147	9.489030647	-5.37E-05	0.385841817	0	0.011764706	23.7141	977.209	655.7373	3.8323	0.702	60	0.445892669	0.001030012	0.553702189	0.001279052
1.149702631	×ÔÉí³µÁ¾	Road 1	2.754761404	9.509932995	-5.82E-05	0.391973048	0	0.011764706	23.7669	977.21	655.7373	3.8323	0.7021	61	0.476287646	0.001100224	0.56168968	0.001297503
1.166187395	×ÔÉí³µÁ¾	Road 1	2.798376329	9.524779129	-6.72E-05	0.393567592	0	0.011764706	23.8039	977.21	655.7373	3.833	0.7014	62	0.448154628	0.001035237	0.569077403	0.001314569
1.234899078	×ÔÉí³µÁ¾	Road 1	2.981564766	9.597761822	-7.98E-05	0.389624298	0	0.011764706	23.9871	977.2129	655.7373	3.8334	0.701	63	0.462413564	0.001068175	0.600850618	0.001387965
1.249790788	×ÔÉí³µÁ¾	Road 1	3.021327337	9.612412262	-9.00E-05	0.38876918	0	0.011764706	24.0245	977.2139	655.7373	3.8321	0.7013	64	0.456425284	0.001054342	0.607647571	0.001403666
1.2662257	×ÔÉí³µÁ¾	Road 1	3.065286622	9.629101181	-9.99E-05	0.476298749	0	0	24.0619	977.2139	655.7373	3.8328	0.7007	65	0.459320346	0.00106103	0.61519646	0.001421104
1.282948724	×ÔÉí³µÁ¾	Road 1	3.110156648	9.659262943	-9.99E-05	0.501070976	0	0	24.1181	977.2148	655.7373	3.8328	0.7006	66	0.525448825	0.001213787	0.623983554	0.001441402
1.299529892	×ÔÉí³µÁ¾	Road 1	3.154738547	9.679344749	-0.000101301	0.493156195	0	0	24.1557	977.2158	655.7373	3.8325	0.7009	67	0.476487377	0.001100686	0.631884271	0.001459653
1.316257682	×ÔÉí³µÁ¾	Road 1	3.199851997	9.70889883	-0.000102901	0.486943513	0	0	24.2123	977.2168	655.7373	3.8316	0.6999	68	0.523526836	0.001209347	0.640641718	0.001479882
1.332909228	×ÔÉí³µÁ¾	Road 1	3.24484992	9.728377247	-0.000103707	0.483987868	0	0	24.2501	977.2178	655.7373	3.8313	0.7002	69	0.473911751	0.001094736	0.648533081	0.001498111
1.349624555	×ÔÉí³µÁ¾	Road 1	3.290116618	9.749143124	-0.000105128	0.482291549	0	0	24.2907	977.2178	655.7373	3.8321	0.6995	70	0.480383422	0.001109686	0.656562847	0.00151666
1.366250076	×ÔÉí³µÁ¾	Road 1	3.33522924	9.768442154	-0.000106357	0.480591565	0	0	24.3286	977.2188	655.7373	3.8318	0.6998	71	0.473873763	0.001094648	0.664441245	0.001534859
1.384138016	×ÔÉí³µÁ¾	Road 1	3.383910547	9.797254658	-0.000107181	0.478889495	0.011764706	0	24.3857	977.2197	655.7373	3.8318	0.6997	72	0.51237638	0.001183589	0.673606603	0.001556031
1.399602653	×ÔÉí³µÁ¾	Road 1	3.426079265	9.81642065	-0.000109051	0.47887671	0.011764706	0	24.4238	977.2197	655.7373	3.8325	0.699	73	0.481384828	0.001111999	0.681051045	0.001573228
1.416189319	×ÔÉí³µÁ¾	Road 1	3.471446278	9.846538639	-0.000116967	0.478862584	0.019607844	0	24.4839	977.2207	655.7372	3.8326	0.6989	74	0.530860334	0.001226287	0.689856248	0.001593568
1.449725175	×ÔÉí³µÁ¾	Road 1	3.563529582	9.884939289	-0.000125947	0.480329782	0.027450981	0	24.5606	977.2227	655.7373	3.8321	0.6995	75	0.474510284	0.001096119	0.705769356	0.001630327
1.466237063	×ÔÉí³µÁ¾	Road 1	3.609000629	9.913812733	-0.000132023	0.481153101	0.035294119	0	24.6184	977.2236	655.7373	3.8322	0.6994	76	0.526704363	0.001216687	0.71446624	0.001650417
1.482865516	×ÔÉí³µÁ¾	Road 1	3.654881831	9.933114338	-0.000139027	0.482199669	0.050980393	0	24.6569	977.2236	655.7372	3.8329	0.6987	77	0.476802195	0.001101413	0.722394723	0.001668732
1.500749424	×ÔÉí³µÁ¾	Road 1	3.704371861	9.962258148	-0.00014125	0.485978127	0.05882353	0	24.715	977.2246	655.7372	3.8329	0.6986	78	0.517578059	0.001195605	0.731651041	0.001690114
1.516252183	×ÔÉí³µÁ¾	Road 1	3.747362938	9.983247185	-0.000143999	0.488497674	0.06666667	0	24.7565	977.2256	655.7372	3.8327	0.6989	79	0.494331549	0.001141906	0.739314544	0.001707817
1.533202473	×ÔÉí³µÁ¾	Road 1	3.794461041	10.00296593	-0.000146784	0.491019964	0.074509807	0	24.7954	977.2266	655.7373	3.8324	0.6991	80	0.478266041	0.001104795	0.747421292	0.001726543
1.54950909	×ÔÉí³µÁ¾	Road 1	3.839860589	10.02282543	-0.000149089	0.494192064	0.082352944	0	24.8343	977.2275	655.7373	3.8322	0.6994	81	0.483339935	0.001116515	0.755302931	0.00174475
1.566227349	×ÔÉí³µÁ¾	Road 1	3.886552392	10.05430555	-0.000151157	0.497977406	0.082352944	0	24.8956	977.2285	655.7373	3.8323	0.6993	82	0.541554247	0.00125099	0.764356776	0.001765664
1.582978965	×ÔÉí³µÁ¾	Road 1	3.933431195	10.07447233	-0.000154297	0.499660939	0.090196081	0	24.9348	977.2285	655.7372	3.833	0.6986	83	0.483065101	0.00111588	0.772448897	0.001784357
1.59959239	×ÔÉí³µÁ¾	Road 1	3.980016832	10.09474554	-0.000158013	0.501943707	0.098039217	0	24.974	977.2295	655.7372	3.8328	0.6988	84	0.484864178	0.001120036	0.780504151	0.001802965
1.616237338	×ÔÉí³µÁ¾	Road 1	4.026832554	10.12539053	-0.000162334	0.506588995	0.113725491	0	25.033	977.2305	655.7372	3.8329	0.6987	85	0.539611577	0.001246503	0.789485958	0.001823713
1.63289145	×ÔÉí³µÁ¾	Road 1	4.073769553	10.14603453	-0.000166732	0.509932995	0.121568628	0	25.0724	977.2314	655.7373	3.8326	0.699	86	0.487491046	0.001126104	0.797604688	0.001842467
1.649541896	×ÔÉí³µÁ¾	Road 1	4.120792616	10.16687593	-0.000173477	0.514366269	0.137254909	0	25.1119	977.2324	655.7373	3.8323	0.6993	87	0.488939939	0.001129451	0.805745757	0.001861273
1.666225333	×ÔÉí³µÁ¾	Road 1	4.168027567	10.19249382	-0.000180402	0.519819558	0.145098045	0	25.1599	977.2334	655.7373	3.8322	0.6994	88	0.514359328	0.00118817	0.814327038	0.001881095
1.682934795	×ÔÉí³µÁ¾	Road 1	4.215492397	10.22614546	-0.000188711	0.526733518	0.160784319	0	25.2223	977.2344	655.7373	3.8324	0.7002	89	0.55722283	0.001287185	0.823637932	0.001902604
1.699633994	×ÔÉí³µÁ¾	Road 1	4.263028914	10.24788465	-0.000196961	0.532855928	0.168627456	0	25.2621	977.2354	655.7373	3.8321	0.7005	90	0.494874407	0.00114316	0.831901938	0.001921693
1.71616421	×ÔÉí³µÁ¾	Road 1	4.310185418	10.26988478	-0.000205448	0.537626982	0.184313729	0	25.302	977.2354	655.7372	3.8338	0.6997	91	0.497870829	0.001150082	0.84013185	0.001940705
1.732886868	×ÔÉí³µÁ¾	Road 1	4.358001956	10.29379034	-0.000215819	0.54392755	0.192156866	0	25.3449	977.2363	655.7372	3.8336	0.6999	92	0.50708437	0.001171365	0.848611649	0.001960293
1.751229338	×ÔÉí³µÁ¾	Road 1	4.410648643	10.33274546	-0.000225513	0.555219412	0.215686277	0	25.4136	977.2373	655.7372	3.8339	0.6997	93	0.569650717	0.001315893	0.85906045	0.00198443
1.766271336	×ÔÉí³µÁ¾	Road 1	4.453919334	10.35597038	-0.000234796	0.563169718	0.23137255	0	25.4538	977.2383	655.7372	3.8337	0.6999	94	0.518573855	0.001197906	0.866860837	0.002002449
1.782912619	×ÔÉí³µÁ¾	Road 1	4.501915956	10.3830843	-0.000245765	0.57572186	0.262745112	0	25.4999	977.2393	655.7373	3.8335	0.7001	95	0.526765576	0.001216828	0.875626892	0.002022698
1.799552435	×ÔÉí³µÁ¾	Road 1	4.550079163	10.42003956	-0.000254855	0.598676145	0.286274523	0	25.5606	977.2402	655.7373	3.8336	0.6999	96	0.580680967	0.001341373	0.885289316	0.002045018
1.816302218	×ÔÉí³µÁ¾	Road 1	4.5986803	10.44575272	-0.000262662	0.618268907	0.31764707	0	25.6012	977.2412	655.7373	3.8334	0.7002	97	0.519653678	0.0012004	0.893993403	0.002065125
1.832922241	×ÔÉí³µÁ¾	Road 1	4.647037605	10.47449226	-0.000271393	0.643433154	0.349019617	0	25.6447	977.2422	655.7373	3.8332	0.7004	98	0.537782359	0.001242277	0.902931358	0.002085771
1.849602745	×ÔÉí³µÁ¾	Road 1	4.695701449	10.50267048	-0.00027758	0.670998335	0.372549027	0	25.6855	977.2422	655.7372	3.834	0.6996	99	0.534808198	0.001235407	0.911852228	0.002106379
1.866218002	×ÔÉí³µÁ¾	Road 1	4.744403537	10.55219994	-0.00028386	0.719956517	0.388235301	0	25.7528	977.2441	655.7373	3.8332	0.7004	100	0.653274173	0.001509063	0.922706546	0.002131452
1.882884944	×ÔÉí³µÁ¾	Road 1	4.793405442	10.5842371	-0.000288232	0.746870399	0.411764711	0	25.7939	977.2441	655.7372	3.834	0.6996	101	0.557876738	0.001288695	0.932004645	0.002152931
1.899506432	×ÔÉí³µÁ¾	Road 1	4.842428313	10.61772137	-0.000290636	0.776394725	0.427450985	0	25.8351	977.2451	655.7372	3.8337	0.6998	102	0.567139013	0.001310091	0.94143134	0.002174706
1.916160178	×ÔÉí³µÁ¾	Road 1	4.891804349	10.67349844	-0.000293053	0.827513814	0.443137258	0	25.9001	977.2461	655.7372	3.834	0.6996	103	0.691141402	0.001596537	0.952941433	0.002201295
1.932943318	×ÔÉí³µÁ¾	Road 1	4.94173933	10.71110258	-0.000293457	0.860068679	0.450980395	0	25.9417	977.2471	655.7372	3.8337	0.6999	104	0.590344943	0.001363697	0.962849275	0.002224182
1.949660111	×ÔÉí³µÁ¾	Road 1	4.991659255	10.75037098	-0.000293457	0.893131495	0.466666669	0	25.9835	977.248	655.7373	3.8335	0.7001	105	0.601451565	0.001389353	0.972903616	0.002247407
1.966144507	×ÔÉí³µÁ¾	Road 1	5.041184072	10.81564264	-0.000293457	0.951090515	0.490196079	0	26.0494	977.249	655.7372	3.8337	0.6999	106	0.75310311	0.001739668	0.985318067	0.002276085
1.982814381	×ÔÉí³µÁ¾	Road 1	5.09148474	10.86285381	-0.000293457	0.993066072	0.513725519	0	26.0945	977.25	655.7373	3.8336	0.7	107	0.649781154	0.001500994	0.996149837	0.002301106
1.999664235	×ÔÉí³µÁ¾	Road 1	5.142544643	10.90903587	-0.000293457	1.035072923	0.53725493	0	26.1368	977.251	655.7373	3.8334	0.7002	108	0.642691644	0.001484618	1.006979096	0.002326122
2.016143133	×ÔÉí³µÁ¾	Road 1	5.192816759	10.98250694	-0.000293457	1.104321837	0.56078434	0	26.2007	977.252	655.7373	3.8336	0.7	109	0.807162207	0.001864545	1.02028024	0.002356847
2.032840865	×ÔÉí³µÁ¾	Road 1	5.244015071	11.03826084	-0.000293457	1.15567708	0.58431375	0	26.2466	977.252	655.7372	3.8344	0.6992	110	0.703564855	0.001625235	1.032028178	0.002383985
2.049539331	×ÔÉí³µÁ¾	Road 1	5.295487605	11.09689522	-0.000293457	1.209953785	0.592156887	0	26.2927	977.2529	655.7372	3.8342	0.6993	111	0.7221561	0.001668181	1.044087077	0.002411841
2.066259056	×ÔÉí³µÁ¾	Road 1	5.347311486	11.15843496	-0.000293457	1.263290405	0.600000024	0	26.3391	977.2539	655.7372	3.8341	0.6995	112	0.740739211	0.001711108	1.056472033	0.00244045
2.082878346	×ÔÉí³µÁ¾	Road 1	5.399243789	11.24935541	-0.000293457	1.336180329	0.615686297	0	26.4044	977.2549	655.7372	3.8343	0.6993	113	0.917196458	0.002118724	1.071715186	0.002475662
2.099505699	×ÔÉí³µÁ¾	Road 1	5.451495234	11.31299715	-0.000293457	1.384006381	0.631372571	0	26.4483	977.2559	655.7372	3.8341	0.6994	114	0.761142442	0.001758239	1.084370971	0.002504897
2.116239354	×ÔÉí³µÁ¾	Road 1	5.504546092	11.41311264	-0.000293457	1.433982849	0.639215708	0	26.5146	977.2568	655.7372	3.8344	0.6992	115	0.976283164	0.002255214	1.100707756	0.002542635
2.132870006	×ÔÉí³µÁ¾	Road 1	5.557593029	11.48295135	-0.000293457	1.506823063	0.639215708	0	26.5591	977.2578	655.7372	3.8342	0.6994	116	0.804773362	0.001859026	1.114091662	0.002573552
2.14959743	×ÔÉí³µÁ¾	Road 1	5.611308725	11.56044788	-0.000293457	1.557389617	0.647058845	0	26.6071	977.2588	655.7372	3.8331	0.6995	117	0.851213868	0.001966304	1.128330277	0.002606443
2.166129112	×ÔÉí³µÁ¾	Road 1	5.664739321	11.63524332	-0.000293457	1.60485661	0.647058845	0	26.6522	977.2598	655.7372	3.833	0.6996	118	0.843966163	0.001949562	1.142282458	0.002638672
2.183639866	×ÔÉí³µÁ¾	Road 1	5.721900938	11.7517396	-0.000293457	1.671866298	0.654901981	0	26.7204	977.2607	655.7372	3.8332	0.6994	119	1.063704456	0.002457157	1.160908724	0.002681699
2.199500017	×ÔÉí³µÁ¾	Road 1	5.774054672	11.83806124	-0.000293457	1.720044136	0.662745118	0	26.7696	977.2617	655.7372	3.8331	0.6995	120	0.946852347	0.002187229	1.175925946	0.002716389
2.216121506	×ÔÉí³µÁ¾	Road 1	5.829094649	11.92094879	-0.000293457	1.76335144	0.662745118	0	26.8158	977.2627	655.7372	3.834	0.6996	121	0.904672295	0.002089793	1.190962946	0.002751124
2.232836833	×ÔÉí³µÁ¾	Road 1	5.884868819	12.01214991	-0.000293457	1.808368087	0.662745118	0	26.8656	977.2637	655.7372	3.8339	0.6997	122	0.957672192	0.002212223	1.20697075	0.002788102
2.249507074	×ÔÉí³µÁ¾	Road 1	5.94116127	12.15656261	-0.000293457	1.873639822	0.662745118	0	26.9428	977.2646	655.7372	3.8343	0.6993	123	1.29924166	0.003001248	1.228629421	0.002838134
2.266126363	×ÔÉí³µÁ¾	Road 1	5.997699299	12.24702816	-0.000293457	1.911276579	0.662745118	0	26.9903	977.2656	655.7372	3.8342	0.6994	124	0.969248883	0.002238965	1.244737649	0.002875344
2.282853053	×ÔÉí³µÁ¾	Road 1	6.055248977	12.3861228	-0.000293457	1.963556528	0.662745118	0	27.0622	977.2666	655.7372	3.8346	0.699	125	1.28145899	0.00296017	1.266172216	0.002924858
2.299490304	×ÔÉí³µÁ¾	Road 1	6.112929388	12.48099747	-0.000293457	1.996441841	0.662745118	0	27.1105	977.2676	655.7372	3.8345	0.6991	126	1.009815837	0.002332675	1.282972776	0.002963667
2.31616311	×ÔÉí³µÁ¾	Road 1	6.17117988	12.57747288	-0.000293457	2.027387619	0.662745118	0	27.1592	977.2686	655.7372	3.8344	0.6992	127	1.024360035	0.002366272	1.300051732	0.00300312
2.332852045	×ÔÉí³µÁ¾	Road 1	6.229973832	12.68254852	-0.000293457	2.059683561	0.662745118	0	27.2119	977.2695	655.7372	3.8343	0.6992	128	1.085853173	0.002508321	1.318173465	0.003044981
2.349454473	×ÔÉí³µÁ¾	Road 1	6.289220673	12.84683361	-0.000293457	2.104742765	0.662745118	0	27.2934	977.2705	655.7372	3.8349	0.6987	129	1.491485504	0.003445332	1.342935745	0.003102182
2.368343111	×ÔÉí³µÁ¾	Road 1	6.357390786	12.99259386	-0.000293457	2.140318871	0.662745118	0	27.3652	977.2725	655.7372	3.8342	0.6994	130	1.262650877	0.002916724	1.366785501	0.003157275
2.386485441	×ÔÉí³µÁ¾	Road 1	6.423388993	13.09608765	-0.000293457	2.163305283	0.662745118	0	27.416	977.2734	655.7372	3.8341	0.6994	131	1.04492567	0.002413778	1.385742888	0.003201066
2.40085151	×ÔÉí³µÁ¾	Road 1	6.476067473	13.20072556	-0.000293457	2.185228825	0.662745118	0	27.4671	977.2734	655.7372	3.8351	0.6985	132	1.230304287	0.002842003	1.403417523	0.003241894
2.417802166	×ÔÉí³µÁ¾	Road 1	6.538971721	13.35967712	-0.000293457	2.216545343	0.670588255	0	27.5446	977.2754	655.7372	3.8345	0.6991	133	1.480116033	0.003419068	1.428506461	0.00329985
2.466455164	×ÔÉí³µÁ¾	Road 1	6.724023615	13.69261608	-0.000293457	2.280418873	0.678431392	0	27.7061	977.2783	655.7372	3.8345	0.6991	134	1.206409958	0.002786807	1.487201922	0.003435436
2.482838757	×ÔÉí³µÁ¾	Road 1	6.787130156	13.86652708	-0.000293457	2.308313608	0.678431392	0	27.7904	977.2793	655.7372	3.8351	0.6985	135	1.67190765	0.003862107	1.514593778	0.003498712
2.499538689	×ÔÉí³µÁ¾	Road 1	6.851973878	13.97834473	-0.000293457	2.326776505	0.701960802	0	27.8445	977.2803	655.7372	3.8351	0.6985	136	1.2143287	0.002805099	1.534872984	0.003545557
2.516205631	×ÔÉí³µÁ¾	Road 1	6.917211877	14.09117517	-0.000293457	2.347580433	0.709803939	0	27.8991	977.2813	655.7372	3.8351	0.6985	137	1.23068358	0.002842879	1.555384716	0.003592939
2.532839949	×ÔÉí³µÁ¾	Road 1	6.982962185	14.22968531	-0.000293457	2.37122488	0.725490212	0	27.9541	977.2822	655.7372	3.8351	0.6985	138	1.429656153	0.003302506	1.579166071	0.003647874
2.549613925	×ÔÉí³µÁ¾	Road 1	7.049957029	14.37831059	-0.000293457	2.407302618	0.725490212	0	28.0375	977.2842	655.7372	3.8347	0.6989	139	1.507116266	0.003481439	1.604446403	0.003706271
2.566221484	×ÔÉí³µÁ¾	Road 1	7.117098513	14.55417595	-0.000293457	2.430334568	0.741176486	0	28.1219	977.2852	655.7372	3.8353	0.6983	140	1.737062876	0.004012615	1.633294778	0.003772911
2.682794404	×ÔÉí³µÁ¾	Road 1	7.621286319	15.57030659	-0.000293457	2.603800058	0.749019623	0	28.6071	977.2939	655.7372	3.8353	0.6983	141	1.555732986	0.003593743	1.814651115	0.004191844
2.701170597	×ÔÉí³µÁ¾	Road 1	7.70141122	15.69692059	-0.000293457	2.618872404	0.764705896	0	28.6679	977.2949	655.7372	3.8354	0.6982	142	1.352977614	0.003125378	1.839513692	0.004249277
2.716867631	×ÔÉí³µÁ¾	Road 1	7.770490012	15.84271603	-0.000293862	2.643294573	0.827450991	0	28.738	977.2969	655.7372	3.8347	0.6989	143	1.689023931	0.003901645	1.866026358	0.004310521
2.732849113	×ÔÉí³µÁ¾	Road 1	7.841393563	15.97178478	-0.000293862	2.675909758	0.835294127	0	28.7999	977.2979	655.7372	3.8349	0.6987	144	1.534453117	0.003544587	1.890549193	0.004367169
2.749576536	×ÔÉí³µÁ¾	Road 1	7.916213933	16.10249977	-0.000293862	2.708204985	0.843137264	0	28.8623	977.2988	655.7372	3.835	0.6986	145	1.508261335	0.003484084	1.915778518	0.004425448
2.766868822	×ÔÉí³µÁ¾	Road 1	7.994471606	16.29209805	-0.000293862	2.754090309	0.850980401	0	28.9523	977.2998	655.7372	3.8357	0.6979	146	1.961466094	0.004530987	1.949696752	0.004503799
2.782789456	×ÔÉí³µÁ¾	Road 1	8.067202803	16.4460989	-0.000295077	2.789606094	0.858823538	0	29.025	977.3018	655.7372	3.8351	0.6985	147	1.796274746	0.004149395	1.978294583	0.00456986
2.799602653	×ÔÉí³µÁ¾	Road 1	8.145015392	16.66103783	-0.000295077	2.834673166	0.866666675	0	29.1262	977.3037	655.7372	3.8349	0.6986	148	2.25839931	0.005216902	2.016265497	0.004657573
2.816169525	×ÔÉí³µÁ¾	Road 1	8.222325807	16.79964066	-0.000295483	2.862637758	0.874509811	0	29.1913	977.3047	655.7372	3.8351	0.6984	149	1.640284968	0.003789058	2.043439888	0.004720346
2.832775985	×ÔÉí³µÁ¾	Road 1	8.300513275	16.94972248	-0.000295483	2.892722845	0.882352948	0	29.2616	977.3057	655.7372	3.8354	0.6981	150	1.74978335	0.004042	2.072497595	0.004787469
2.849547395	×ÔÉí³µÁ¾	Road 1	8.380468636	17.16249847	-0.000295483	2.934119463	0.890196085	0	29.3611	977.3076	655.7372	3.8353	0.6983	151	2.303505318	0.005321097	2.111130627	0.004876712
2.866231198	×ÔÉí³µÁ¾	Road 1	8.460671825	17.30609493	-0.000295483	2.96146369	0.898039222	0	29.4281	977.3086	655.7372	3.8355	0.698	152	1.716506238	0.003965129	2.139768479	0.004942865
2.882827028	×ÔÉí³µÁ¾	Road 1	8.541120194	17.45101833	-0.000296703	2.987566233	0.905882359	0	29.4957	977.3096	655.7372	3.8358	0.6978	153	1.747224034	0.004036088	2.168765112	0.005009847
2.899432754	×ÔÉí³µÁ¾	Road 1	8.622630785	17.67089939	-0.000296703	3.026272535	0.905882359	0	29.5982	977.3115	655.7372	3.8357	0.6979	154	2.446954985	0.005652466	2.209398577	0.005103711
2.916122422	×ÔÉí³µÁ¾	Road 1	8.705289308	17.82963467	-0.000297927	3.049854755	0.905882359	0	29.6721	977.3135	655.7372	3.8351	0.6985	155	1.897635867	0.004383539	2.24106949	0.005176871
2.934062047	×ÔÉí³µÁ¾	Road 1	8.795253341	18.05336094	-0.000298335	3.050475121	0.905882359	0	29.7768	977.3145	655.7372	3.836	0.6976	156	2.374053844	0.005484064	2.283659125	0.005275253
2.949509456	×ÔÉí³µÁ¾	Road 1	8.873362016	18.20313206	-0.000299974	3.092792034	0.905882359	0	29.8473	977.3164	655.7372	3.8353	0.6982	157	1.960522081	0.004528806	2.313944112	0.005345211
2.966248243	×ÔÉí³µÁ¾	Road 1	8.958656347	18.34419651	-0.000301206	3.130477905	0.905882359	0	29.9133	977.3174	655.7372	3.8356	0.698	158	1.773536802	0.00409687	2.343630966	0.005413788
2.999494519	×ÔÉí³µÁ¾	Road 1	9.130902331	18.65127811	-0.000302855	3.149360895	0.905882359	0	30.0572	977.3203	655.7372	3.8353	0.6983	159	1.921595989	0.004438887	2.407516877	0.005561364
3.016504924	×ÔÉí³µÁ¾	Road 1	9.220380341	18.93669434	-0.000304924	3.153952122	0.905882359	0	30.193	977.3223	655.7372	3.8358	0.6978	160	3.172470037	0.007328406	2.461481876	0.005686023
3.033714735	×ÔÉí³µÁ¾	Road 1	9.311644659	19.0909441	-0.000309509	3.166534185	0.905882359	0	30.2669	977.3232	655.7372	3.8361	0.6975	161	1.921241055	0.004438067	2.494546072	0.005762401
3.049672024	×ÔÉí³µÁ¾	Road 1	9.397002441	19.25690632	-0.000312872	3.178486109	0.905882359	0	30.3468	977.3252	655.7372	3.8356	0.698	162	2.173128668	0.005019927	2.529223314	0.005842506
3.066520044	×ÔÉí³µÁ¾	Road 1	9.488318929	19.51204662	-0.000317111	3.182708502	0.905882359	0	30.4707	977.3271	655.7372	3.8359	0.6977	163	2.988624969	0.006903724	2.579575728	0.00595882
3.082788906	×ÔÉí³µÁ¾	Road 1	9.577198689	19.66745682	-0.000321817	3.18483901	0.905882359	0	30.5469	977.3281	655.7372	3.8363	0.6973	164	2.070171191	0.004782095	2.613255057	0.006036619
3.099513397	×ÔÉí³µÁ¾	Road 1	9.669341913	19.83412285	-0.00032831	3.188169718	0.905882359	0	30.6292	977.3301	655.7372	3.8359	0.6977	165	2.1552159	0.004978549	2.649299945	0.006119883
3.116151747	×ÔÉí³µÁ¾	Road 1	9.7620902	20.0677248	-0.000336215	3.190500259	0.905882359	0	30.7456	977.332	655.7372	3.836	0.6975	166	2.876789366	0.006645383	2.697164974	0.006230451
3.132873305	×ÔÉí³µÁ¾	Road 1	9.856025465	20.22341137	-0.0003465	3.187711477	0.905882359	0	30.8239	977.334	655.7372	3.8355	0.6981	167	2.07823319	0.004800719	2.731916272	0.006310727
3.149535115	×ÔÉí³µÁ¾	Road 1	9.950190783	20.3456377	-0.000361619	3.186110735	0.905882359	0	30.8859	977.335	655.7372	3.8357	0.6979	168	1.744183138	0.004029063	2.76097752	0.006377858
3.166200591	×ÔÉí³µÁ¾	Road 1	10.04561095	20.61222954	-0.000376217	3.186099529	0.905882359	0	31.0224	977.3369	655.7372	3.8362	0.6974	169	3.291380105	0.007603088	2.815829934	0.006504567
3.184509337	×ÔÉí³µÁ¾	Road 1	10.15128716	20.77883205	-0.000395627	3.184338093	0.905882359	0	31.1087	977.3389	655.7372	3.8358	0.6978	170	2.089081421	0.004825778	2.854078396	0.006592921
3.201300908	×ÔÉí³µÁ¾	Road 1	10.24929242	21.0116684	-0.000418248	3.175165176	0.905882359	0	31.2306	977.3408	655.7372	3.8361	0.6975	171	2.967341747	0.006854559	2.903904725	0.00670802
3.266141025	×ÔÉí³µÁ¾	Road 1	10.63966523	21.6739603	-0.000447583	3.157471418	0.905882359	0	31.5863	977.3467	655.7372	3.8367	0.6969	172	2.35252955	0.005434343	3.056443017	0.007060383
3.283223275	×ÔÉí³µÁ¾	Road 1	10.74360355	21.9044878	-0.000479378	3.142971277	0.905882359	0	31.7135	977.3496	655.7372	3.836	0.6975	173	3.01153083	0.006956636	3.107886739	0.007179218
3.299552252	×ÔÉí³µÁ¾	Road 1	10.84365252	22.05749302	-0.000657622	3.130218744	0.905882359	0	31.7989	977.3506	655.7372	3.8366	0.697	174	2.251507239	0.005200982	3.144651548	0.007264145
3.316102262	×ÔÉí³µÁ¾	Road 1	10.94575593	22.20979271	-0.000708014	3.114933491	0.905882359	0	31.885	977.3525	655.7372	3.8362	0.6974	175	2.23296171	0.005158142	3.181607087	0.007349512
3.332815023	×ÔÉí³µÁ¾	Road 1	11.04961665	22.37204189	-0.000760154	3.096168995	0.905882359	0	31.9779	977.3545	655.7372	3.836	0.6976	176	2.344149755	0.005414986	3.220784302	0.007440012
3.349486363	×ÔÉí³µÁ¾	Road 1	11.15436267	22.61879654	-0.000818793	3.067540646	0.905882359	0	32.1217	977.3564	655.7372	3.8366	0.697	177	3.353335212	0.007746204	3.276688894	0.007569151
3.366165768	×ÔÉí³µÁ¾	Road 1	11.25985035	22.76793938	-0.000876174	3.054727077	0.905882359	0	32.2099	977.3584	655.7372	3.8363	0.6973	178	2.230697298	0.005152911	3.313895597	0.007655099
3.382794954	×ÔÉí³µÁ¾	Road 1	11.36570682	22.9165329	-0.000936176	3.045114517	0.905882359	0	32.2987	977.3594	655.7372	3.8369	0.6967	179	2.242166315	0.005179404	3.351180998	0.007741228
3.399540705	×ÔÉí³µÁ¾	Road 1	11.47333792	23.13852196	-0.000997941	3.029579639	0.905882359	0	32.4331	977.3623	655.7372	3.8364	0.6972	180	3.118042065	0.007202677	3.403394955	0.007861842
3.432854794	×ÔÉí³µÁ¾	Road 1	11.69017903	23.43236847	-0.001052862	3.004421949	0.905882359	0	32.6142	977.3652	655.7372	3.8368	0.6968	181	2.257218266	0.005214174	3.478592125	0.008035548
3.449526868	×ÔÉí³µÁ¾	Road 1	11.79975973	23.66175442	-0.001109761	2.991679192	0.905882359	0	32.7581	977.3682	655.7372	3.8365	0.6971	182	3.283835393	0.00758566	3.53334047	0.008162016
3.466779566	×ÔÉí³µÁ¾	Road 1	11.91385397	23.80724945	-0.001237008	2.984167099	0.905882359	0	32.8504	977.3701	655.7372	3.8362	0.6974	183	2.214921257	0.005116468	3.571553838	0.008250289
3.482831426	×ÔÉí³µÁ¾	Road 1	12.02069987	23.96265621	-0.001299213	2.973434448	0.905882359	0	32.9499	977.3721	655.7372	3.836	0.6975	184	2.484774026	0.005739828	3.611439084	0.008342424
3.499489204	×ÔÉí³µÁ¾	Road 1	12.13258106	24.17923279	-0.001377024	2.959151983	0.905882359	0	33.0904	977.374	655.7372	3.8366	0.6969	185	3.192645325	0.007375011	3.66462146	0.008465276
3.516701581	×ÔÉí³µÁ¾	Road 1	12.24882584	24.31280766	-0.001448484	2.952519894	0.905882359	0	33.1779	977.376	655.7372	3.8363	0.6973	186	2.115162669	0.004886026	3.701028437	0.008549376
3.532810624	×ÔÉí³µÁ¾	Road 1	12.3585823	24.52804012	-0.001523586	2.943968296	0.905882359	0	33.3204	977.3779	655.7372	3.8369	0.6967	187	3.310482448	0.007647214	3.754357142	0.008672565
3.54953035	×ÔÉí³µÁ¾	Road 1	12.47316406	24.67111988	-0.001628967	2.936336517	0.905882359	0	33.4161	977.3799	655.7372	3.8377	0.6969	188	2.311125506	0.0053387	3.792998526	0.008761827
3.566394865	×ÔÉí³µÁ¾	Road 1	12.58973953	24.88489494	-0.001721943	2.922894716	0.905882359	0	33.5606	977.3828	655.7372	3.8374	0.6972	189	3.207878746	0.0074102	3.847097847	0.008886796
3.666151289	×ÔÉí³µÁ¾	Road 1	13.30667747	25.87278557	-0.00179395	2.881496906	0.905882359	0	34.2515	977.3955	655.7372	3.8372	0.6973	190	2.6731976	0.006175086	4.113766478	0.009502801
3.682821529	×ÔÉí³µÁ¾	Road 1	13.42713271	26.01275482	-0.001874888	2.875998735	0.905882359	0	34.3524	977.3975	655.7372	3.8371	0.6974	191	2.384757118	0.005508789	4.153520953	0.009594633
3.69952366	×ÔÉí³µÁ¾	Road 1	13.54846635	26.1524168	-0.002204319	2.869779587	0.905882359	0	34.4538	977.3994	655.7372	3.837	0.6976	192	2.388228091	0.005516807	4.193409452	0.009686776
3.716159078	×ÔÉí³µÁ¾	Road 1	13.67032612	26.37115631	-0.002248024	2.859009504	0.905882359	0	34.6143	977.4023	655.7372	3.837	0.6976	193	3.489328817	0.00806035	4.251455894	0.009820863
3.73281429	×ÔÉí³µÁ¾	Road 1	13.79301903	26.51989403	-0.002287532	2.853710413	0.905882359	0	34.7245	977.4043	655.7372	3.837	0.6975	194	2.547233712	0.00588411	4.293880611	0.009918864
3.753203609	×ÔÉí³µÁ¾	Road 1	13.94428489	26.70795937	-0.002338773	2.848611832	0.905882359	0	34.865	977.4072	655.7372	3.8367	0.6979	195	2.629155172	0.006073348	4.347487295	0.010042696
3.767723998	×ÔÉí³µÁ¾	Road 1	14.05256753	26.84621716	-0.002387502	2.842291594	0.905882359	0	34.9691	977.4092	655.7372	3.8369	0.698	196	2.712175455	0.006265125	4.386869137	0.010133668
3.782809616	×ÔÉí³µÁ¾	Road 1	14.16568448	26.99398842	-0.002458519	2.834732771	0.905882359	0	35.0813	977.4111	655.7372	3.837	0.6973	197	2.788807779	0.006442146	4.428940027	0.010230851
3.802965073	×ÔÉí³µÁ¾	Road 1	14.3178612	27.1805397	-0.002524136	2.822042704	0.905882359	0	35.2243	977.4141	655.7372	3.8367	0.6976	198	2.678029292	0.006186248	4.48291693	0.010355538
3.818268792	×ÔÉí³µÁ¾	Road 1	14.4343179	27.3949173	-0.002613427	2.795243025	0.905882359	0	35.391	977.417	655.7372	3.8368	0.6975	199	3.816484086	0.008816078	4.541323331	0.010490457
3.833836798	×ÔÉí³µÁ¾	Road 1	14.55332883	27.52050133	-0.00275667	2.777123451	0.905882359	0	35.4902	977.4189	655.7372	3.8366	0.6976	200	2.428210575	0.005609166	4.579125728	0.01057778
3.849526868	×ÔÉí³µÁ¾	Road 1	14.67389982	27.66435013	-0.002895744	2.756332397	0.905882359	0	35.6051	977.4209	655.7372	3.8368	0.6975	201	2.701338942	0.006240093	4.621509924	0.010675688
3.866121598	×ÔÉí³µÁ¾	Road 1	14.80203738	27.79769325	-0.003068326	2.740511656	0.905882359	0	35.713	977.4229	655.7372	3.8368	0.6975	202	2.441863031	0.005640704	4.662031982	0.010769294
3.882776443	×ÔÉí³µÁ¾	Road 1	14.93155866	27.99645481	-0.003255669	2.723498821	0.905882359	0	35.8757	977.4258	655.7372	3.8368	0.6975	203	3.39490659	0.007842234	4.718573626	0.010899905
3.899525493	×ÔÉí³µÁ¾	Road 1	15.06242605	28.1283165	-0.003553942	2.714499235	0.905882359	0	35.9848	977.4287	655.7372	3.8358	0.6984	204	2.428040101	0.005608773	4.759240991	0.010993847
3.916128654	×ÔÉí³µÁ¾	Road 1	15.19301879	28.31592693	-0.003856374	2.705696583	0.905882359	0	36.0945	977.4307	655.7372	3.8358	0.6974	205	3.276169534	0.007567952	4.813635761	0.011119499
3.932821988	×ÔÉí³µÁ¾	Road 1	15.32497083	28.45610905	-0.004218373	2.695574045	0.905882359	0	36.2599	977.4336	655.7372	3.8359	0.6973	206	2.581324369	0.005962859	4.85672667	0.011219039
3.949549777	×ÔÉí³µÁ¾	Road 1	15.45780189	28.58667126	-0.00468901	2.690712214	0.905882359	0	36.3708	977.4355	655.7372	3.836	0.6973	207	2.446152816	0.005650613	4.8976454	0.011313561
3.966125813	×ÔÉí³µÁ¾	Road 1	15.590328	28.78215237	-0.005155069	2.685817242	0.905882359	0	36.5381	977.4395	655.7372	3.8351	0.6981	208	3.447226523	0.007963093	4.95478675	0.011445557
3.982766363	×ÔÉí³µÁ¾	Road 1	15.7239713	28.91225967	-0.005627824	2.6822052	0.905882359	0	36.6503	977.4414	655.7372	3.8351	0.698	209	2.474047995	0.005715051	4.995956268	0.011540659
3.999479124	×ÔÉí³µÁ¾	Road 1	15.85879758	29.04215584	-0.006224174	2.678042412	0.905882359	0	36.763	977.4434	655.7372	3.8352	0.6979	210	2.47221881	0.005710825	5.03727387	0.011636103
4.033024143	×ÔÉí³µÁ¾	Road 1	16.13277875	29.40323868	-0.006808474	2.672003031	0.905882359	0	37.0796	977.4502	655.7373	3.8341	0.698	211	3.24708409	0.007500764	5.146197369	0.011887716
4.049482881	×ÔÉí³µÁ¾	Road 1	16.26758708	29.48646355	-0.007463153	2.670767069	0.905882359	0	37.1368	977.4512	655.7373	3.8342	0.698	212	1.816044133	0.004195062	5.176087163	0.011956761
4.066098138	×ÔÉí³µÁ¾	Road 1	16.40461525	29.68966599	-0.00916173	2.665827513	0.905882359	0	37.334	977.4551	655.7373	3.8328	0.6983	213	3.658089179	0.008450186	5.236867256	0.012097163
4.082747852	×ÔÉí³µÁ¾	Road 1	16.54256734	29.82799072	-0.010072229	2.662929058	0.905882359	0	37.458	977.458	655.7373	3.8322	0.699	214	2.668589172	0.006164441	5.281298501	0.0121998
4.099467944	×ÔÉí³µÁ¾	Road 1	16.68165903	29.94780693	-0.011072946	2.662263632	0.905882359	0	37.5659	977.46	655.7373	3.8322	0.698	215	2.38383741	0.005506664	5.321156482	0.012291871
4.116111059	×ÔÉí³µÁ¾	Road 1	16.82108966	30.15963364	-0.011959808	2.659687519	0.905882359	0	37.7579	977.4648	655.7373	3.8307	0.6994	216	3.840228578	0.008870928	5.38506985	0.012439511
4.132860109	×ÔÉí³µÁ¾	Road 1	16.96200699	30.28842773	-0.012792386	2.657138109	0.905882359	0	37.8754	977.4668	655.7373	3.8309	0.6992	217	2.544073631	0.00587681	5.427680667	0.012537942
4.149530716	×ÔÉí³µÁ¾	Road 1	17.10286023	30.41710854	-0.013641816	2.654735804	0.905882359	0	37.9934	977.4697	655.7373	3.8301	0.699	218	2.561338036	0.005916691	5.470379727	0.012636577
4.166153305	×ÔÉí³µÁ¾	Road 1	17.24428295	30.62831039	-0.014316481	2.652792931	0.905882359	0	38.1884	977.4746	655.7374	3.8287	0.7004	219	3.889689072	0.008985182	5.535036427	0.012785934
4.182821713	×ÔÉí³µÁ¾	Road 1	17.38669034	30.75678177	-0.014896329	2.651207685	0.905882359	0	38.3078	977.4766	655.7373	3.8289	0.6992	220	2.583583255	0.005968077	5.578100646	0.012885412
4.199508082	×ÔÉí³µÁ¾	Road 1	17.52984632	30.88518105	-0.015400772	2.649873018	0.905882359	0	38.4276	977.4795	655.7374	3.8282	0.6999	221	2.589776095	0.005982383	5.621314606	0.012985237
4.21610941	×ÔÉí³µÁ¾	Road 1	17.67290657	31.02263374	-0.015674405	2.647150993	0.905882359	0	38.5566	977.4834	655.7374	3.8266	0.7005	222	2.756109704	0.006366613	5.667069687	0.013090931
4.2327243	×ÔÉí³µÁ¾	Road 1	17.81675986	31.16913986	-0.015772089	2.645276785	0.905882359	0	38.6947	977.4863	655.7374	3.8252	0.7009	223	2.912022298	0.006726772	5.715452619	0.013202696
4.249468219	×ÔÉí³µÁ¾	Road 1	17.96270901	31.37956924	-0.015772089	2.643478155	0.905882359	0	38.8945	977.4912	655.7374	3.8239	0.7012	224	3.940712225	0.009103045	5.781435583	0.013355116
4.266135893	×ÔÉí³µÁ¾	Road 1	18.10862856	31.51671638	-0.015720323	2.64159584	0.905882359	0	39.0255	977.4941	655.7374	3.8233	0.7007	225	2.781376988	0.006424981	5.82779467	0.013462206
4.282773877	×ÔÉí³µÁ¾	Road 1	18.25513262	31.69942932	-0.01558855	2.639135122	0.905882359	0	39.2011	977.499	655.7374	3.8216	0.7015	226	3.546263687	0.008191869	5.886797347	0.013598502
4.299625563	×ÔÉí³µÁ¾	Road 1	18.40411661	31.82722435	-0.015423452	2.637349844	0.905882359	0	39.3246	977.502	655.7374	3.8209	0.7021	227	2.629204177	0.006073462	5.93110387	0.01370085
4.316124988	×ÔÉí³µÁ¾	Road 1	18.55057173	31.95495758	-0.015265158	2.636669397	0.905882359	0	39.4486	977.5059	655.7375	3.8193	0.7028	228	2.682160522	0.006195791	5.975357977	0.013803077
4.332742811	×ÔÉí³µÁ¾	Road 1	18.69896169	32.14643898	-0.015113547	2.634267092	0.905882359	0	39.6355	977.5107	655.7375	3.8168	0.7033	229	3.74158761	0.008643067	6.037535018	0.013946706
4.349461437	×ÔÉí³µÁ¾	Road 1	18.84884412	32.27399025	-0.014929611	2.632866144	0.905882359	0	39.7608	977.5137	655.7375	3.8161	0.703	230	2.674708557	0.006178577	6.08225247	0.014050003
4.366161369	×ÔÉí³µÁ¾	Road 1	18.99944589	32.46518326	-0.014796781	2.631490469	0.905882359	0	39.8865	977.5176	655.7375	3.8136	0.7044	231	3.755142307	0.008674379	6.14496309	0.014194865
4.382811816	×ÔÉí³µÁ¾	Road 1	19.15019052	32.59255943	-0.014642811	2.629795074	0.905882359	0	40.076	977.5225	655.7375	3.813	0.7041	232	2.704021881	0.006246291	6.189986262	0.014298868
4.399498551	×ÔÉí³µÁ¾	Road 1	19.3018538	32.71987038	-0.014462722	2.628207207	0.905882359	0	40.203	977.5264	655.7375	3.8104	0.7047	233	2.707632588	0.006254631	6.235167811	0.014403238
4.416127371	×ÔÉí³µÁ¾	Road 1	19.45387219	32.91070633	-0.014311084	2.625356436	0.905882359	0	40.3944	977.5313	655.7376	3.809	0.7051	234	3.810500202	0.008802255	6.298531932	0.014549609
4.432846363	×ÔÉí³µÁ¾	Road 1	19.60730529	33.03782501	-0.014160507	2.624866247	0.905882359	0	40.5226	977.5352	655.7376	3.8074	0.7057	235	2.723604238	0.006291526	6.344067851	0.014654797
4.449384277	×ÔÉí³µÁ¾	Road 1	19.75966032	33.1648922	-0.013984404	2.623251438	0.905882359	0	40.6512	977.5391	655.7377	3.8058	0.7063	236	2.75586735	0.006366054	6.389644148	0.014760078
4.466066248	×ÔÉí³µÁ¾	Road 1	19.91422499	33.35534019	-0.013815037	2.621028185	0.905882359	0	40.8452	977.5449	655.7377	3.8025	0.7077	237	3.840880861	0.008872435	6.453717609	0.014908088
4.482744553	×ÔÉí³µÁ¾	Road 1	20.0693436	33.48223915	-0.013673202	2.620296717	0.905882359	0	40.9751	977.5488	655.7377	3.8009	0.7082	238	2.757821267	0.006370567	6.499713392	0.015014338
4.499630695	×ÔÉí³µÁ¾	Road 1	20.22728733	33.67242966	-0.01349598	2.617993355	0.905882359	0	41.1709	977.5547	655.7377	3.7986	0.7095	239	3.830164434	0.00884768	6.564390093	0.015163741
4.516149181	×ÔÉí³µÁ¾	Road 1	20.38237359	33.79913292	-0.013315151	2.616308451	0.905882359	0	41.3021	977.5586	655.7378	3.797	0.7101	240	2.799137235	0.006466007	6.610627604	0.01527055
4.549545745	×ÔÉí³µÁ¾	Road 1	20.6986066	34.0885025	-0.013146142	2.613704205	0.905882359	0	41.6037	977.5674	655.7378	3.7927	0.7114	241	3.106835765	0.007176791	6.714385244	0.01551023
4.56637837	×ÔÉí³µÁ¾	Road 1	20.85858661	34.21498604	-0.012958355	2.611899376	0.905882359	0	41.7365	977.5723	655.7379	3.7902	0.7129	242	2.783843442	0.006430678	6.761244636	0.015618475
4.582767829	×ÔÉí³µÁ¾	Road 1	21.01529998	34.42262077	-0.012647709	2.610008001	0.905882359	0	41.9557	977.5791	655.7379	3.7873	0.7148	243	4.325072042	0.009990916	6.832130226	0.015782221
4.59942414	×ÔÉí³µÁ¾	Road 1	21.17514938	34.54893608	-0.012489337	2.608856201	0.905882359	0	42.0897	977.583	655.7379	3.7858	0.7153	244	2.828827219	0.006534591	6.879248053	0.015891063
4.616060291	×ÔÉí³µÁ¾	Road 1	21.33538869	34.67517929	-0.012361636	2.607568502	0.905882359	0	42.2243	977.5869	655.738	3.7834	0.7158	245	2.839537789	0.006559332	6.926487032	0.016000185
4.63276792	×ÔÉí³µÁ¾	Road 1	21.49719463	34.86439476	-0.012239671	2.605780602	0.905882359	0	42.427	977.5938	655.738	3.7802	0.7179	246	3.974127637	0.009180235	6.992885283	0.016153565
4.649492045	×ÔÉí³µÁ¾	Road 1	21.65974601	34.99046974	-0.012128174	2.604747534	0.905882359	0	42.5628	977.5977	655.738	3.7787	0.7184	247	2.847587143	0.006577926	7.040508685	0.016263575
4.666111334	×ÔÉí³µÁ¾	Road 1	21.82190171	35.12548141	-0.01204139	2.602606773	0.905882359	0	42.7088	977.6025	655.738	3.7765	0.7206	248	3.034465176	0.007009615	7.090939339	0.01638007
4.699426523	×ÔÉí³µÁ¾	Road 1	22.14870819	35.31432266	-0.011978971	2.601155758	0.905882359	0	42.9142	977.6094	655.7381	3.7724	0.7218	249	2.299931695	0.005312842	7.167561998	0.016557068
4.716065973	×ÔÉí³µÁ¾	Road 1	22.31330398	35.61084366	-0.011955021	2.597833395	0.905882359	0	43.2392	977.6201	655.7382	3.7675	0.7256	250	6.038321532	0.013948523	7.268036346	0.016789164
4.732706889	×ÔÉí³µÁ¾	Road 1	22.47849515	35.73650665	-0.011955021	2.596786976	0.905882359	0	43.3778	977.625	655.7382	3.7651	0.727	251	2.905993876	0.006712846	7.316394747	0.016900872
4.749499559	×ÔÉí³µÁ¾	Road 1	22.64577872	35.86212502	-0.011955021	2.596139669	0.905882359	0	43.517	977.6289	655.7383	3.7637	0.7274	252	2.893235407	0.006683374	7.364979895	0.017013104
4.766187761	×ÔÉí³µÁ¾	Road 1	22.81297762	36.06835899	-0.011955021	2.593699455	0.905882359	0	43.7467	977.6367	655.7383	3.7591	0.73	253	4.4215527	0.010213787	7.438767659	0.017183553
4.78276343	×ÔÉí³µÁ¾	Road 1	22.97962655	36.19378166	-0.011955021	2.591828346	0.905882359	0	43.8871	977.6416	655.7383	3.7567	0.7314	254	2.944154066	0.006800996	7.487568983	0.017296284
4.799428539	×ÔÉí³µÁ¾	Road 1	23.14775505	36.3191494	-0.011955021	2.591300011	0.905882359	0	44.028	977.6465	655.7384	3.7544	0.7337	255	2.939572017	0.006790411	7.53655727	0.017409447
4.816066156	×ÔÉí³µÁ¾	Road 1	23.31630956	36.47134438	-0.011955021	2.591137171	0.913725495	0	44.1796	977.6514	655.7384	3.7523	0.7349	256	3.460845031	0.007994552	7.594137484	0.017542458
4.832799811	×ÔÉí³µÁ¾	Road 1	23.48662776	36.64145737	-0.011955021	2.592782497	0.913725495	0	44.3927	977.6592	655.7385	3.7483	0.7378	257	3.796601527	0.00877015	7.657668504	0.017689214
4.84945429	×ÔÉí³µÁ¾	Road 1	23.65672046	36.76691093	-0.011955021	2.594715357	0.913725495	0	44.5354	977.6641	655.7385	3.746	0.7391	258	2.975319253	0.006872987	7.707220895	0.01780368
4.86604902	×ÔÉí³µÁ¾	Road 1	23.82711291	36.96431465	-0.011955021	2.598243952	0.913725495	0	44.7605	977.6719	655.7385	3.7413	0.7419	259	4.377329211	0.01011163	7.779861491	0.01797148
4.882696167	×ÔÉí³µÁ¾	Road 1	23.998625	37.09004974	-0.011955021	2.599351883	0.913725495	0	44.9045	977.6768	655.7386	3.739	0.7432	260	3.005331853	0.006942317	7.829891694	0.01808705
4.899421025	×ÔÉí³µÁ¾	Road 1	24.1715221	37.21583633	-0.011955021	2.601252556	0.921568632	0	45.0489	977.6826	655.7386	3.7357	0.7464	261	3.004239805	0.006939794	7.880137177	0.018203117
4.916130487	×ÔÉí³µÁ¾	Road 1	24.34492803	37.35975037	-0.011955021	2.604793549	0.921568632	0	45.2145	977.6885	655.7387	3.7328	0.7483	262	3.365942551	0.007775327	7.936380266	0.018333038
4.932801094	×ÔÉí³µÁ¾	Road 1	24.51884865	37.55797462	-0.011955021	2.610093594	0.921568632	0	45.4433	977.6963	655.7388	3.7282	0.7509	263	4.44133986	0.010259495	8.010420098	0.01850407
4.949422216	×ÔÉí³µÁ¾	Road 1	24.69283644	37.68434143	-0.011955021	2.613617659	0.921568632	0	45.5895	977.7021	655.7388	3.725	0.7531	264	3.064926173	0.007079979	8.06136261	0.018621748
4.966068264	×ÔÉí³µÁ¾	Road 1	24.86783744	37.84703865	-0.011955021	2.616242647	0.921568632	0	45.7362	977.707	655.7388	3.7228	0.7544	265	3.784283258	0.008741694	8.124355971	0.018767262
4.982710646	×ÔÉí³µÁ¾	Road 1	25.04351086	38.00082664	-0.011955021	2.618461132	0.921568632	0	45.9572	977.7148	655.7389	3.719	0.7572	266	3.624102069	0.008371676	8.184669663	0.018906587
4.999566364	×ÔÉí³µÁ¾	Road 1	25.22202963	38.12757111	-0.011955021	2.620526791	0.929411769	0	46.1052	977.7207	655.739	3.7158	0.7604	267	3.070045112	0.007091804	8.236417477	0.019026124
5.016069455	×ÔÉí³µÁ¾	Road 1	25.39768628	38.31790924	-0.011955021	2.625072479	0.929411769	0	46.328	977.7295	655.739	3.711	0.7641	268	4.407768329	0.010181945	8.309159279	0.019194158
5.032722834	×ÔÉí³µÁ¾	Road 1	25.57557258	38.45409851	-0.011955021	2.629125595	0.937254906	0	46.4879	977.7354	655.7391	3.7071	0.7661	269	3.31194161	0.007650585	8.364314298	0.019321566
5.049523569	×ÔÉí³µÁ¾	Road 1	25.75562727	38.58146095	-0.011959808	2.63456893	0.937254906	0	46.6376	977.7412	655.7391	3.704	0.7683	270	3.123485434	0.007215251	8.416791148	0.019442788
5.06774984	×ÔÉí³µÁ¾	Road 1	25.95192975	38.77309341	-0.011959808	2.645125151	0.945098042	0	46.8631	977.749	655.7391	3.7002	0.771	271	4.115879232	0.009507681	8.49180828	0.019616077
5.083901404	×ÔÉí³µÁ¾	Road 1	26.1264623	38.90132103	-0.011959808	2.653091192	0.945098042	0	47.014	977.7549	655.7392	3.6971	0.7741	272	3.267141183	0.007547096	8.544577719	0.019737975
5.099730765	×ÔÉí³µÁ¾	Road 1	26.2980787	39.02994347	-0.011959808	2.66053772	0.945098042	0	47.1654	977.7607	655.7393	3.694	0.7762	273	3.339767894	0.007714864	8.59744411	0.019860096
5.116719176	×ÔÉí³µÁ¾	Road 1	26.48317471	39.22353973	-0.011959808	2.67155695	0.952941179	0	47.3935	977.7695	655.7393	3.6884	0.7799	274	4.458355061	0.0102988	8.673184479	0.020035056
5.132702124	×ÔÉí³µÁ¾	Road 1	26.65789094	39.35309258	-0.011959808	2.679775953	0.952941179	0	47.5462	977.7754	655.7394	3.6853	0.782	275	3.358194103	0.007757428	8.72685832	0.020159043
5.14941965	×ÔÉí³µÁ¾	Road 1	26.84154278	39.54811363	-0.011959808	2.689656734	0.952941179	0	47.7762	977.7852	655.7395	3.6797	0.7866	276	4.584784787	0.010590853	8.803504581	0.020336096
5.166049203	×ÔÉí³µÁ¾	Road 1	27.02483053	39.67851105	-0.011959808	2.695666313	0.952941179	0	47.9301	977.791	655.7395	3.6766	0.7887	277	3.292981961	0.007606788	8.858265398	0.020462593
5.182723109	×ÔÉí³µÁ¾	Road 1	27.20921236	39.80918312	-0.011959808	2.700525999	0.952941179	0	48.0846	977.7969	655.7396	3.6736	0.7917	278	3.301337511	0.00762609	8.91331159	0.02058975
5.19946996	×ÔÉí³µÁ¾	Road 1	27.39500963	39.94005775	-0.011959808	2.703445196	0.952941179	0	48.2396	977.8037	655.7396	3.6686	0.7948	279	3.303617346	0.007631356	8.968636777	0.020717551
5.216058458	×ÔÉí³µÁ¾	Road 1	27.57978319	40.09915695	-0.011959808	2.707010031	0.952941179	0	48.4284	977.8105	655.7397	3.6652	0.7972	280	3.928892124	0.009075741	9.033811198	0.020868104
5.232726133	×ÔÉí³µÁ¾	Road 1	27.76639293	40.30526733	-0.011959808	2.709495068	0.952941179	0	48.6739	977.8213	655.7397	3.6589	0.8025	281	4.909718394	0.011341449	9.115644787	0.021057139
5.249486546	×ÔÉí³µÁ¾	Road 1	27.95465207	40.43652649	-0.011959808	2.710136652	0.952941179	0	48.8308	977.8271	655.7399	3.6559	0.8045	282	3.346793204	0.007731092	9.171738425	0.021186716
5.266455164	×ÔÉí³µÁ¾	Road 1	28.14586857	40.56779594	-0.011959808	2.710529566	0.952941179	0	48.9882	977.834	655.7399	3.6519	0.8085	283	3.323276565	0.007676769	9.228129833	0.02131698
5.282706064	×ÔÉí³µÁ¾	Road 1	28.32997093	40.7834919	-0.011959808	2.71111083	0.952941179	0	49.2479	977.8447	655.74	3.6449	0.8135	284	5.282853557	0.012203392	9.31398096	0.021515296
5.299380337	×ÔÉí³µÁ¾	Road 1	28.51947764	40.91477852	-0.011959808	2.710524321	0.952941179	0	49.4066	977.8516	655.7401	3.6409	0.8165	285	3.397743851	0.007848788	9.370635868	0.021646169
5.316376079	×ÔÉí³µÁ¾	Road 1	28.71325758	41.04603081	-0.011959808	2.710056543	0.952941179	0	49.5659	977.8574	655.7401	3.638	0.8185	286	3.354238576	0.007748291	9.427643643	0.021777857
5.332711654	×ÔÉí³µÁ¾	Road 1	28.90044625	41.25225105	-0.011959808	2.709784508	0.952941179	0	49.8172	977.8682	655.7402	3.6318	0.8237	287	5.110068598	0.011804258	9.51111955	0.021970686
5.34938556	×ÔÉí³µÁ¾	Road 1	29.09216291	41.39281769	-0.011959808	2.708715677	0.952941179	0	49.9892	977.876	655.7402	3.6271	0.8274	288	3.632487361	0.008391046	9.571687304	0.022110598
5.36664449	×ÔÉí³µÁ¾	Road 1	29.2912349	41.52396355	-0.011959808	2.707900763	0.952941179	0	50.1503	977.8828	655.7403	3.6232	0.8313	289	3.345453452	0.007727997	9.62942625	0.022243975
5.382743636	×ÔÉí³µÁ¾	Road 1	29.47780887	41.72061539	-0.011959808	2.706965923	0.952941179	0	50.3929	977.8926	655.7404	3.6168	0.8357	290	5.018231706	0.011592115	9.710215495	0.022430598
5.399408745	×ÔÉí³µÁ¾	Road 1	29.67154843	41.85165825	-0.011959808	2.705574751	0.952941179	0	50.5553	977.9004	655.7405	3.612	0.8395	291	3.465069035	0.008004309	9.767961248	0.02256399
5.416669141	×ÔÉí³µÁ¾	Road 1	29.87283652	41.98264618	-0.011959808	2.705002308	0.952941179	0	50.7181	977.9072	655.7405	3.6081	0.8424	292	3.375598637	0.007797633	9.826225417	0.022698581
5.432715503	×ÔÉí³µÁ¾	Road 1	30.06084205	42.17902679	-0.011959808	2.703672409	0.952941179	0	50.9634	977.918	655.7407	3.6018	0.8477	293	5.078667828	0.011731723	9.90771956	0.022886832
5.449394541	×ÔÉí³µÁ¾	Road 1	30.2569099	42.31924324	-0.011959808	2.70262599	0.952941179	0	51.1393	977.9258	655.7407	3.5962	0.8514	294	3.698587217	0.008543736	9.969408436	0.023029333
5.466018595	×ÔÉí³µÁ¾	Road 1	30.45293541	42.45004234	-0.011959808	2.701344252	0.952941179	0	51.304	977.9326	655.7408	3.5924	0.8552	295	3.512136355	0.008113035	10.02779438	0.023164205
5.482761048	×ÔÉí³µÁ¾	Road 1	30.65126906	42.64615173	-0.011959808	2.700168371	0.952941179	0	51.552	977.9443	655.7409	3.5852	0.8614	296	4.938668623	0.011408325	10.11047981	0.023355208
5.499432021	×ÔÉí³µÁ¾	Road 1	30.84936112	42.77683067	-0.011959808	2.698818445	0.952941179	0	51.7179	977.9512	655.741	3.5814	0.8643	297	3.526068139	0.008145217	10.16926279	0.023490997
5.51643876	×ÔÉí³µÁ¾	Road 1	31.05205995	42.90744781	-0.011959808	2.697488546	0.952941179	0	51.8844	977.959	655.741	3.5766	0.8681	298	3.47729048	0.008032541	10.22840017	0.023627604
5.532714953	×ÔÉí³µÁ¾	Road 1	31.2467262	43.05665932	-0.011959808	2.696699619	0.952941179	0	52.0752	977.9678	655.7411	3.5713	0.8724	299	4.040140297	0.009332724	10.29415827	0.023779506
5.549381162	×ÔÉí³µÁ¾	Road 1	31.44704891	43.27089615	-0.011959808	2.693565607	0.952941179	0	52.3507	977.9805	655.7412	3.5626	0.8791	300	5.431564489	0.012546914	10.38468185	0.023988615
5.566401463	×ÔÉí³µÁ¾	Road 1	31.65224295	43.40102577	-0.011959808	2.687420607	0.952941179	0	52.5191	977.9873	655.7413	3.5589	0.8819	301	3.500886727	0.008087048	10.444268	0.024126259
5.582714312	×ÔÉí³µÁ¾	Road 1	31.84949676	43.53094597	-0.011959808	2.682351351	0.952941179	0	52.688	977.9951	655.7413	3.5541	0.8866	302	3.630214675	0.008385796	10.50348714	0.024263055
5.599423407	×ÔÉí³µÁ¾	Road 1	32.0522298	43.67914124	-0.011959808	2.677195787	0.952941179	0	52.8816	978.0049	655.7415	3.5479	0.8919	303	3.981916664	0.009198227	10.57002137	0.024416749
5.616049661	×ÔÉí³µÁ¾	Road 1	32.25468372	43.83633842	-0.011959808	2.674325228	0.952941179	0	53.088	978.0137	655.7415	3.5428	0.896	304	4.216296912	0.009739646	10.64012259	0.024578683
5.632751059	×ÔÉí³µÁ¾	Road 1	32.45869552	43.97491035	-0.011959808	2.672001123	0.952941179	0	53.2708	978.0225	655.7416	3.5364	0.9004	305	3.79017857	0.008755312	10.70342387	0.024724909
5.649379512	×ÔÉí³µÁ¾	Road 1	32.66288212	44.20566101	-0.011959808	2.671295643	0.952941179	0	53.5767	978.0371	655.7418	3.5273	0.9086	306	5.931280974	0.013701259	10.8020519	0.02495274
5.666040589	×ÔÉí³µÁ¾	Road 1	32.86802461	44.32564545	-0.011959808	2.670357466	0.952941179	0	53.7364	978.0449	655.7418	3.5224	0.9125	307	3.399629081	0.007853143	10.85869338	0.025083582
5.682690302	×ÔÉí³µÁ¾	Road 1	33.07362463	44.45482407	-0.011959808	2.670083761	0.952941179	0	53.9088	978.0527	655.7419	3.5178	0.9172	308	3.62211206	0.008367079	10.91900051	0.025222891
5.699371539	×ÔÉí³µÁ¾	Road 1	33.28025534	44.59324837	-0.011959808	2.671197176	0.952941179	0	54.0941	978.0615	655.742	3.5123	0.9216	309	3.839782777	0.008869898	10.98305284	0.025370852
5.716061574	×ÔÉí³µÁ¾	Road 1	33.48776542	44.75942001	-0.011959808	2.672589779	0.952941179	0	54.3173	978.0723	655.7421	3.5047	0.9273	310	4.49218952	0.010376958	11.05802764	0.025544044
5.732841415	×ÔÉí³µÁ¾	Road 1	33.69708079	44.90717926	-0.011959808	2.673031569	0.952941179	0	54.5163	978.082	655.7422	3.4985	0.9325	311	4.061054415	0.009381036	11.12617148	0.025701456
5.749402422	×ÔÉí³µÁ¾	Road 1	33.90455877	45.10116692	-0.011959808	2.67424202	0.952941179	0	54.7786	978.0947	655.7423	3.4906	0.9394	312	5.206466374	0.012026937	11.21239581	0.025900634
5.766012547	×ÔÉí³µÁ¾	Road 1	34.11324921	45.23057899	-0.011959808	2.675724745	0.952941179	0	54.954	978.1035	655.7424	3.485	0.944	313	3.6928558	0.008530497	11.27373461	0.026042327
5.782686087	×ÔÉí³µÁ¾	Road 1	34.32363568	45.42474518	-0.011959808	2.676577091	0.952941179	0	55.2181	978.1162	655.7426	3.4761	0.9509	314	5.214955354	0.012046547	11.36068637	0.026243186
5.799391517	×ÔÉí³µÁ¾	Road 1	34.53502532	45.55421219	-0.011959808	2.67670393	0.952941179	0	55.3948	978.125	655.7426	3.4705	0.9555	315	3.700980723	0.008549265	11.42251285	0.026386005
5.816024735	×ÔÉí³µÁ¾	Road 1	34.7461424	45.69299011	-0.011959808	2.678409576	0.952941179	0	55.5847	978.1348	655.7427	3.4642	0.9618	316	3.945017077	0.009112989	11.48813118	0.026537583
5.832780383	×ÔÉí³µÁ¾	Road 1	34.95971793	45.88732796	-0.011959808	2.679273367	0.952941179	0	55.8515	978.1484	655.7429	3.4553	0.9696	317	5.246569981	0.012119577	11.57604086	0.026740654
5.849420566	×ÔÉí³µÁ¾	Road 1	35.17242073	46.01692543	-0.011959808	2.679768324	0.952941179	0	56.03	978.1572	655.743	3.4498	0.9742	318	3.75074671	0.008664225	11.63845397	0.026884829
5.866024827	×ÔÉí³µÁ¾	Road 1	35.38526219	46.14654694	-0.011959808	2.679963112	0.952941179	0	56.209	978.166	655.743	3.4442	0.9788	319	3.767764799	0.008703537	11.70101492	0.027029344
5.882696534	×ÔÉí³µÁ¾	Road 1	35.59991179	46.35029526	-0.011959808	2.68118453	0.952941179	0	56.4913	978.1807	655.7432	3.4337	0.9875	320	5.545044961	0.012809054	11.79346028	0.027242893
5.899381436	×ÔÉí³µÁ¾	Road 1	35.81533243	46.48000259	-0.011959808	2.68170476	0.952941179	0	56.6716	978.1904	655.7433	3.4272	0.993	321	3.7797805	0.008731293	11.85652555	0.027388574
5.916369115	×ÔÉí³µÁ¾	Road 1	36.03531805	46.61897964	-0.011955021	2.681855202	0.952941179	0	56.8653	978.2002	655.7434	3.4209	0.9983	322	3.95366134	0.009132958	11.92368908	0.027543722
5.932684529	×ÔÉí³µÁ¾	Road 1	36.24748018	46.81362305	-0.011935884	2.683716297	0.952941179	0	57.1375	978.2139	655.7435	3.4121	1.0061	323	5.480511578	0.012659982	12.01310589	0.027750275
5.949410853	×ÔÉí³µÁ¾	Road 1	36.46558879	46.94342995	-0.011897671	2.684294939	0.952941179	0	57.3196	978.2236	655.7437	3.4057	1.0126	324	3.809128002	0.008799086	12.0768186	0.027897451
5.966389367	×ÔÉí³µÁ¾	Road 1	36.68759815	47.07324028	-0.011864302	2.684232712	0.952941179	0	57.5022	978.2334	655.7437	3.3982	1.0182	325	3.772096736	0.008713543	12.1408632	0.028045394
5.982728241	×ÔÉí³µÁ¾	Road 1	36.90212764	47.26801758	-0.01181674	2.685952425	0.952941179	0	57.777	978.2471	655.7438	3.3895	1.0259	326	5.527244414	0.012767935	12.23117215	0.028254008
5.999461162	×ÔÉí³µÁ¾	Road 1	37.12243482	47.39793091	-0.01173145	2.686230421	0.952941179	0	57.9608	978.2568	655.744	3.3831	1.0314	327	3.844491585	0.008880776	12.29550173	0.028402609
6.016037565	×ÔÉí³µÁ¾	Road 1	37.34157863	47.59281807	-0.011651275	2.686642408	0.952941179	0	58.2375	978.2715	655.7441	3.3734	1.0401	328	5.495832712	0.012695374	12.38660286	0.028613053
6.032788081	×ÔÉí³µÁ¾	Road 1	37.56362866	47.72271423	-0.011543387	2.688823462	0.952941179	0	58.4226	978.2822	655.7442	3.366	1.0466	329	3.86502897	0.008928217	12.45134409	0.028762605
6.050180804	×ÔÉí³µÁ¾	Road 1	37.79486502	47.86202431	-0.011426874	2.688945532	0.952941179	0	58.6215	978.292	655.7443	3.3588	1.0518	330	3.980420371	0.009194771	12.52057444	0.028922527
6.066069547	×ÔÉí³µÁ¾	Road 1	38.00696625	48.05694237	-0.011320377	2.68814826	0.952941179	0	58.9008	978.3076	655.7445	3.3483	1.0614	331	5.758297399	0.013301667	12.61206655	0.029133874
6.082733922	×ÔÉí³µÁ¾	Road 1	38.23002311	48.1869072	-0.011191624	2.689487696	0.952941179	0	59.0877	978.3174	655.7446	3.3419	1.0678	332	3.918129467	0.009050879	12.67735973	0.029284701
6.099490304	×ÔÉí³µÁ¾	Road 1	38.45521941	48.38196602	-0.011077495	2.690793037	0.952941179	0	59.369	978.333	655.7448	3.3313	1.0773	333	5.533723032	0.0127829	12.7700849	0.029498896
6.116027851	×ÔÉí³µÁ¾	Road 1	38.67815757	48.5306179	-0.010986752	2.691263676	0.952941179	0	59.5841	978.3447	655.7449	3.3225	1.0841	334	4.441572244	0.010260032	12.84353761	0.029668572
6.132838116	×ÔÉí³µÁ¾	Road 1	38.9053797	48.6607235	-0.010883012	2.692451477	0.952941179	0	59.7728	978.3555	655.745	3.3152	1.0904	335	3.9288363	0.009075612	12.90958239	0.029821135
6.149465103	×ÔÉí³µÁ¾	Road 1	39.13072555	48.79086342	-0.010762066	2.692953348	0.952941179	0	59.962	978.3652	655.7451	3.3088	1.0957	336	3.975345821	0.009183049	12.97568041	0.029973822
6.166022078	×ÔÉí³µÁ¾	Road 1	39.35576394	48.93032799	-0.010659747	2.693540573	0.952941179	0	60.1653	978.377	655.7452	3.3008	1.1027	337	4.237330205	0.009788233	13.04583778	0.030135885
6.182730807	×ÔÉí³µÁ¾	Road 1	39.58381456	49.13493118	-0.010558079	2.69474864	0.952941179	0	60.4645	978.3936	655.7454	3.2896	1.1129	338	5.870963818	0.013561926	13.14393413	0.030362488
6.199435137	×ÔÉí³µÁ¾	Road 1	39.81240948	49.26517067	-0.010439557	2.694708109	0.952941179	0	60.6556	978.4043	655.7455	3.2823	1.1202	339	3.998239557	0.009235933	13.21072204	0.030516768
6.216445908	×ÔÉí³µÁ¾	Road 1	40.04612128	49.46057281	-0.010339296	2.696560383	0.952941179	0	60.9431	978.4199	655.7457	3.2709	1.1295	340	5.584949259	0.012901233	13.30572633	0.030736228
6.232745561	×ÔÉí³µÁ¾	Road 1	40.27065303	49.59089127	-0.010218108	2.696791649	0.952941179	0	61.1354	978.4307	655.7457	3.2637	1.1358	341	4.10763986	0.009488648	13.37267944	0.030890889
6.249360451	×ÔÉí³µÁ¾	Road 1	40.50012877	49.72122345	-0.010097872	2.697134018	0.952941179	0	61.3282	978.4424	655.7459	3.2554	1.143	342	4.052916949	0.009362238	13.44001821	0.031046442
6.266409344	×ÔÉí³µÁ¾	Road 1	40.73656892	49.92608757	-0.00998707	2.69843173	0.952941179	0	61.6322	978.459	655.7461	3.2444	1.1531	343	5.862217527	0.013541722	13.53996253	0.031277313
6.282771311	×ÔÉí³µÁ¾	Road 1	40.96407523	50.05649529	-0.009868656	2.698441744	0.952941179	0	61.8263	978.4707	655.7462	3.2362	1.1603	344	4.1326306	0.009546377	13.60758049	0.031433511
6.299408562	×ÔÉí³µÁ¾	Road 1	41.19601184	50.18688583	-0.00972196	2.698504925	0.952941179	0	62.021	978.4814	655.7463	3.228	1.1675	345	4.085057203	0.009436482	13.67554461	0.031590508
6.316659427	×ÔÉí³µÁ¾	Road 1	41.43717215	50.32658386	-0.009584984	2.698475361	0.952941179	0	62.23	978.4932	655.7465	3.2201	1.1744	346	4.208544869	0.009721739	13.74814565	0.031758216
6.333671298	×ÔÉí³µÁ¾	Road 1	41.67595931	50.53140678	-0.00943703	2.6965909	0.952941179	0	62.5377	978.5117	655.7466	3.2071	1.1863	347	5.940127781	0.013721695	13.84919834	0.031991648
6.350619755	×ÔÉí³µÁ¾	Road 1	41.91473254	50.71751518	-0.00927039	2.696192741	0.952941179	0	62.8185	978.5273	655.7468	3.1966	1.1959	348	5.498538676	0.012701624	13.94239009	0.032206921
6.366710837	×ÔÉí³µÁ¾	Road 1	42.1420504	50.85701065	-0.009117707	2.694279432	0.952941179	0	63.0298	978.54	655.7469	3.1877	1.2037	349	4.500449587	0.010396039	14.01480719	0.032374205
6.38393751	×ÔÉí³µÁ¾	Road 1	42.38603328	50.98711624	-0.00892725	2.692694187	0.952941179	0	63.2275	978.5518	655.7471	3.1786	1.2118	350	4.020203333	0.00928667	14.08406192	0.032534183
6.400465893	×ÔÉí³µÁ¾	Road 1	42.62102172	51.18216133	-0.008762794	2.690721989	0.952941179	0	63.525	978.5684	655.7473	3.1674	1.222	351	5.90772682	0.013646849	14.18170709	0.032759743
6.416037198	×ÔÉí³µÁ¾	Road 1	42.84300526	51.32137184	-0.008573494	2.688744068	0.952941179	0	63.7382	978.5811	655.7474	3.1586	1.2298	352	4.658926256	0.01076212	14.25425265	0.032927324
6.432646224	×ÔÉí³µÁ¾	Road 1	43.0803815	51.45120964	-0.008402067	2.687882423	0.952941179	0	63.9378	978.5928	655.7475	3.1505	1.2379	353	4.171676945	0.009636574	14.32354014	0.033087378
6.451475847	×ÔÉí³µÁ¾	Road 1	43.35051245	51.64582558	-0.008218019	2.685629368	0.952941179	0	64.238	978.6104	655.7477	3.1384	1.2491	354	5.306014849	0.012256894	14.4234504	0.03331817
6.467072811	×ÔÉí³µÁ¾	Road 1	43.5749093	51.79396591	-0.008044027	2.682828665	0.952941179	0	64.4674	978.624	655.7479	3.1288	1.2576	355	4.948098204	0.011430107	14.50062571	0.033496445
6.483111109	×ÔÉí³µÁ¾	Road 1	43.80623278	51.92349815	-0.007865263	2.681679487	0.952941179	0	64.6688	978.6367	655.748	3.1188	1.2657	356	4.323398962	0.009987052	14.56996567	0.033656621
6.49938217	×ÔÉí³µÁ¾	Road 1	44.04154045	52.06222458	-0.007703444	2.680833817	0.952941179	0	64.885	978.6494	655.7482	3.1101	1.2745	357	4.53582178	0.010477748	14.6437683	0.033827105
6.516391841	×ÔÉí³µÁ¾	Road 1	44.28861914	52.29279671	-0.007557955	4.188247204	0.952941179	0	65.1888	978.668	655.7483	3.097	1.2865	358	6.819058267	0.015752025	14.75975825	0.034095042
6.532744278	×ÔÉí³µÁ¾	Road 1	44.5271113	52.50421143	-0.007428243	4.337353706	0.952941179	0	65.3923	978.6797	655.7485	3.089	1.2936	359	6.562796662	0.01516006	14.86707596	0.034342945
6.549342673	×ÔÉí³µÁ¾	Road 1	44.77023964	52.73172455	-0.007296578	4.312436104	0.952941179	0	65.6112	978.6934	655.7486	3.0793	1.3033	360	6.942996522	0.016038322	14.98231856	0.034609156
6.566026476	×ÔÉí³µÁ¾	Road 1	45.01559852	52.9430809	-0.007186917	4.304470062	0.952941179	0	65.8163	978.7051	655.7487	3.0713	1.3103	361	6.496398163	0.01500668	15.09070319	0.034859524
6.583639133	×ÔÉí³µÁ¾	Road 1	45.27616808	53.2600193	-0.007081736	4.304925919	0.952941179	0	66.1255	978.7236	655.7489	3.0584	1.3223	362	8.972155969	0.02072568	15.24872669	0.035224559
6.599372456	×ÔÉí³µÁ¾	Road 1	45.50985643	53.47109756	-0.006977587	4.296864033	0.952941179	0	66.3327	978.7363	655.7491	3.0485	1.3313	363	6.90312869	0.015946227	15.35733585	0.035475446
6.616441876	×ÔÉí³µÁ¾	Road 1	45.76488782	53.787006	-0.006894343	4.292250633	0.952941179	0	66.645	978.7559	655.7493	3.0346	1.3442	364	9.295741864	0.021473164	15.51600877	0.03584198
6.632670417	×ÔÉí³µÁ¾	Road 1	46.00830675	53.9979641	-0.006811763	4.307314396	0.952941179	0	66.8542	978.7686	655.7495	3.0257	1.3521	365	6.774201027	0.015648404	15.62594417	0.036095931
6.649448791	×ÔÉí³µÁ¾	Road 1	46.2609604	54.20984917	-0.006749446	4.323760986	0.952941179	0	67.0643	978.7813	655.7496	3.0168	1.361	366	6.626254376	0.015306648	15.73712194	0.036352752
6.665979374	×ÔÉí³µÁ¾	Road 1	46.51112788	54.48101578	-0.00669076	4.268821239	0.952941179	0	67.2902	978.7949	655.7497	3.0072	1.3696	367	8.427880426	0.019468404	15.87643972	0.036674576
6.684082849	×ÔÉí³µÁ¾	Road 1	46.78621414	54.71216812	-0.006648588	2.829077005	0.952941179	0	67.5928	978.8135	655.7499	2.9942	1.3817	368	6.749881456	0.015592226	15.99863603	0.036956849
6.699332318	×ÔÉí³µÁ¾	Road 1	47.01871928	54.88837166	-0.006606594	3.145062447	0.952941179	0	67.9118	978.833	655.7501	2.9805	1.3955	369	6.199029655	0.014319759	16.09316794	0.037175218
6.716035182	×ÔÉí³µÁ¾	Road 1	47.27395298	55.01100311	-0.006574411	2.385403156	0.952941179	0	68.1099	978.8457	655.7502	2.9714	1.4046	370	4.214359421	0.00973517	16.16355981	0.037337823
6.732727783	×ÔÉí³µÁ¾	Road 1	47.52949941	55.11227303	-0.006551946	2.006379843	0.952941179	0	68.3237	978.8594	655.7504	2.9616	1.4144	371	3.615463559	0.008351721	16.2239113	0.037477235
6.74933241	×ÔÉí³µÁ¾	Road 1	47.78414906	55.20983505	-0.006539131	2.135095596	0.952941179	0	68.5378	978.8721	655.7505	2.9518	1.4222	372	3.530307657	0.008155011	16.28253074	0.037612646
6.766018412	×ÔÉí³µÁ¾	Road 1	48.04070188	55.35119476	-0.00653273	2.41642642	0.952941179	0	68.8137	978.8896	655.7507	2.9392	1.4338	373	4.777744496	0.01103659	16.3622522	0.037796803
6.782726408	×ÔÉí³µÁ¾	Road 1	48.2984439	55.53456345	-0.006519941	2.37810874	0.952941179	0	69.1518	978.9102	655.751	2.9249	1.4482	374	5.990407933	0.013837842	16.46233991	0.038028005
6.799376488	×ÔÉí³µÁ¾	Road 1	48.55582485	55.64966927	-0.006516746	2.123615026	0.952941179	0	69.383	978.9248	655.7512	2.9144	1.4587	375	4.05412373	0.009365026	16.5298414	0.038183934
6.816040131	×ÔÉí³µÁ¾	Road 1	48.81385843	55.74536705	-0.006516746	1.936963677	0.952941179	0	69.5993	978.9385	655.7513	2.9047	1.4675	376	3.497847278	0.008080027	16.58812827	0.038318576
6.832704873	×ÔÉí³µÁ¾	Road 1	49.07256353	55.88675423	-0.00651036	1.916430116	0.952941179	0	69.9397	978.96	655.7515	2.8894	1.4818	377	4.827127033	0.011150663	16.6685711	0.038504399
6.849378779	×ÔÉí³µÁ¾	Road 1	49.33184191	55.97981529	-0.00651036	1.99809444	0.952941179	0	70.1568	978.9736	655.7517	2.8796	1.4916	378	3.433225052	0.00793075	16.72581637	0.038636636
6.865999534	×ÔÉí³µÁ¾	Road 1	49.59076724	56.08235893	-0.00651036	2.008172989	0.952941179	0	70.3898	978.9883	655.7518	2.8682	1.501	379	3.723641953	0.008601613	16.78770612	0.038779601
6.882710096	×ÔÉí³µÁ¾	Road 1	49.85170342	56.21416397	-0.006507168	1.875137687	0.960784316	0	70.7011	979.0078	655.7521	2.8544	1.5149	380	4.564501812	0.010543999	16.8639815	0.038955797
6.899319122	×ÔÉí³µÁ¾	Road 1	50.11145047	56.30007362	-0.006497599	1.777225256	0.960784316	0	70.9195	979.0215	655.7522	2.8447	1.5237	381	3.252601803	0.00751351	16.91800405	0.039080589
6.916042147	×ÔÉí³µÁ¾	Road 1	50.37336263	56.38237152	-0.006497599	1.731901407	0.960784316	0	71.1382	979.0352	655.7524	2.835	1.5334	382	3.134675115	0.0072411	16.9704253	0.039201682
6.932678664	×ÔÉí³µÁ¾	Road 1	50.63448707	56.50509224	-0.006497599	1.744172931	0.960784316	0	71.3885	979.0518	655.7526	2.8229	1.5445	383	4.337675035	0.010020029	17.04258911	0.039368381
6.949438344	×ÔÉí³µÁ¾	Road 1	50.8979845	56.59957466	-0.006491225	1.752152801	0.960784316	0	71.7176	979.0723	655.7528	2.8084	1.5591	384	3.495391686	0.008074355	17.10117075	0.039503704
6.966052868	×ÔÉí³µÁ¾	Road 1	51.15960362	56.68707733	-0.00647849	1.721129775	0.960784316	0	71.9375	979.0869	655.7529	2.7977	1.5687	385	3.318972245	0.007666826	17.1563139	0.039631085
6.982644666	×ÔÉí³µÁ¾	Road 1	51.42138786	56.80055237	-0.006475309	1.67211473	0.960784316	0	72.2678	979.1074	655.7532	2.7832	1.5833	386	4.095591971	0.009460817	17.22426713	0.039788057
6.999333234	×ÔÉí³µÁ¾	Road 1	51.68506178	56.87882309	-0.006465772	1.668716431	0.960784316	0	72.4884	979.1221	655.7534	2.7726	1.593	387	3.046191824	0.007036703	17.27510371	0.03990549
7.01601887	×ÔÉí³µÁ¾	Road 1	51.94907998	56.96309853	-0.006449897	1.682100892	0.960784316	0	72.7251	979.1367	655.7535	2.7612	1.6033	388	3.227572	0.007455691	17.3289578	0.040029893
7.032738963	×ÔÉí³µÁ¾	Road 1	52.21424589	57.09282303	-0.006434049	1.675044656	0.960784316	0	73.0887	979.1611	655.7538	2.7434	1.6202	389	4.567758792	0.010551523	17.40533115	0.040206315
7.049308034	×ÔÉí³µÁ¾	Road 1	52.47737635	57.17095642	-0.006408744	1.656901598	0.960784316	0	73.3104	979.1748	655.754	2.7338	1.6299	390	3.072915771	0.007098435	17.45624651	0.040323929
7.066010531	×ÔÉí³µÁ¾	Road 1	52.74301016	57.25381737	-0.006380357	1.645994186	0.960784316	0	73.5483	979.1904	655.7542	2.7225	1.6402	391	3.198160699	0.007387751	17.50966378	0.040447323
7.082646315	×ÔÉí³µÁ¾	Road 1	53.007965	57.33648605	-0.006364623	1.648928404	0.960784316	0	73.7865	979.2061	655.7543	2.7112	1.6515	392	3.206480354	0.00740697	17.5630061	0.040570544
7.099384369	×ÔÉí³µÁ¾	Road 1	53.27508946	57.45280037	-0.006323834	1.656929255	0.960784316	0	74.1207	979.2275	655.7545	2.6958	1.666	393	4.193627468	0.009687279	17.63319926	0.04073269
7.115964437	×ÔÉí³µÁ¾	Road 1	53.54004981	57.53036041	-0.00628322	1.651893854	0.960784316	0	74.3438	979.2422	655.7547	2.6852	1.6766	394	3.071634346	0.007095475	17.68412717	0.040850334
7.13262478	×ÔÉí³µÁ¾	Road 1	53.8068278	57.64591599	-0.006252097	1.638175845	0.952941179	0	74.679	979.2646	655.7549	2.6688	1.692	395	4.200215744	0.009702498	17.7541042	0.041011981
7.216049661	×ÔÉí³µÁ¾	Road 1	55.15243255	58.0663353	-0.006196335	1.62354517	0.952941179	0	75.9138	979.3457	655.7559	2.6092	1.7486	396	3.271330504	0.007556773	18.02701456	0.041642404
7.232741528	×ÔÉí³µÁ¾	Road 1	55.42221732	58.18553009	-0.006147048	1.620123148	0.945098042	0	76.2683	979.3691	655.7562	2.5922	1.7646	397	4.33958666	0.010024445	18.09945036	0.04180973
7.249514038	×ÔÉí³µÁ¾	Road 1	55.69365843	58.26128769	-0.005824143	1.616981983	0.890196085	0	76.4942	979.3848	655.7563	2.5807	1.7761	398	3.025826009	0.006989658	18.15020106	0.041926964
7.265983773	×ÔÉí³µÁ¾	Road 1	55.96056813	58.34185867	-0.005753303	1.597505927	0.866666675	0	76.7366	979.4004	655.7565	2.5695	1.7873	399	3.218590907	0.007434945	18.2032104	0.042049416
7.282692135	×ÔÉí³µÁ¾	Road 1	56.23183201	58.44677811	-0.005662656	1.549911976	0.850980401	0	77.0603	979.4219	655.7567	2.5539	1.802	400	3.923465113	0.009063204	18.26876508	0.042200847
7.29940233	×ÔÉí³µÁ¾	Road 1	56.50345669	58.51809998	-0.005561462	1.51614213	0.819607854	0	77.2873	979.4375	655.757	2.5424	1.8135	401	2.912287519	0.006727384	18.31742997	0.042313263
7.315971768	×ÔÉí³µÁ¾	Road 1	56.77329428	58.62693329	-0.005461481	1.467083216	0.796078444	0	77.6444	979.4619	655.7572	2.5235	1.8304	402	4.080752504	0.009426538	18.38504574	0.042469456
7.332753442	×ÔÉí³µÁ¾	Road 1	57.04690133	58.69410782	-0.005351493	1.433773756	0.764705896	0	77.872	979.4766	655.7574	2.5129	1.8409	403	2.785725826	0.006435027	18.43179488	0.042577446
7.349404988	×ÔÉí³µÁ¾	Road 1	57.31871042	58.764077	-0.005229189	1.392404556	0.717647076	0	78.1162	979.4932	655.7576	2.5008	1.8521	404	2.889698645	0.006675204	18.47991283	0.042688599
7.366201324	×ÔÉí³µÁ¾	Road 1	57.5932997	58.85339584	-0.005103332	1.322603941	0.678431392	0	78.4422	979.5156	655.7578	2.4842	1.8686	405	3.460358945	0.007993429	18.53803419	0.042822859
7.399455298	×ÔÉí³µÁ¾	Road 1	58.13801296	58.9694252	-0.004984853	1.218171	0.639215708	0	78.8994	979.5459	655.7582	2.4623	1.8896	406	2.535034784	0.00585593	18.62233417	0.043017592
7.433555283	×ÔÉí³µÁ¾	Road 1	58.69799886	59.1187706	-0.004836733	1.097855449	0.607843161	0	79.5539	979.5908	655.7587	2.4292	1.9217	407	2.994553484	0.006917419	18.7244484	0.043253476
7.48270973	×ÔÉí³µÁ¾	Road 1	59.50725407	59.26867218	-0.004587162	0.989701152	0.568627477	0	80.2922	979.6416	655.7593	2.3919	1.958	408	2.321005389	0.005361522	18.83853613	0.043517018
7.50084033	×ÔÉí³µÁ¾	Road 1	59.8060863	59.33592911	-0.004317133	0.944814026	0.529411793	0	80.6538	979.666	655.7595	2.373	1.9749	409	2.662621113	0.006150655	18.88681105	0.043628534
7.518358048	×ÔÉí³µÁ¾	Road 1	60.09500199	59.37396927	-0.003903848	0.916402519	0.505882382	0	80.8676	979.6807	655.7597	2.3621	1.9857	410	1.875668202	0.004332794	18.91966848	0.043704434
7.535138622	×ÔÉí³µÁ¾	Road 1	60.37196954	59.41889648	-0.003751521	0.879238605	0.490196079	0	81.131	979.6982	655.7599	2.3493	1.9984	411	2.136429662	0.004935153	18.955519	0.043787249
7.551515251	×ÔÉí³µÁ¾	Road 1	60.64251136	59.47198105	-0.003598906	0.832553208	0.474509805	0	81.4604	979.7217	655.7602	2.3317	2.0149	412	2.427793973	0.005608204	18.99527808	0.043879092
7.566161736	×ÔÉí³µÁ¾	Road 1	60.88462485	59.50974655	-0.003450487	0.802614868	0.466666669	0	81.7077	979.7383	655.7604	2.3196	2.027	413	2.088492316	0.004824417	19.02586715	0.043949753
7.582674357	×ÔÉí³µÁ¾	Road 1	61.15774177	59.54359818	-0.003306206	0.777277589	0.450980395	0	81.9387	979.7539	655.7606	2.3082	2.0384	414	1.817717694	0.004198928	19.05588243	0.044019088
7.599471059	×ÔÉí³µÁ¾	Road 1	61.4357728	59.58977509	-0.003154175	0.74058193	0.427450985	0	82.2688	979.7773	655.7608	2.2907	2.0549	415	2.178674358	0.005032738	19.09247698	0.044103622
7.616715694	×ÔÉí³µÁ¾	Road 1	61.72137498	59.62248001	-0.003004971	0.705194294	0.419607848	0	82.5166	979.7939	655.761	2.2786	2.067	416	1.740659644	0.004020924	19.12249401	0.044172961
7.632702673	×ÔÉí³µÁ¾	Road 1	61.98627515	59.6510788	-0.002847652	0.666572928	0.403921574	0	82.748	979.8105	655.7612	2.2662	2.0794	417	1.685904945	0.00389444	19.14944654	0.044235222
7.649338091	×ÔÉí³µÁ¾	Road 1	62.26210164	59.69043732	-0.002672934	0.614959002	0.396078438	0	83.0953	979.834	655.7615	2.2491	2.0955	418	1.984314577	0.004583767	19.18245644	0.044311474
7.665968011	×ÔÉí³µÁ¾	Road 1	62.5379652	59.71819839	-0.002522439	0.58701843	0.388235301	0	83.36	979.8525	655.7617	2.2354	2.1093	419	1.625795689	0.003755588	19.2094933	0.04437393
7.683015071	×ÔÉí³µÁ¾	Road 1	62.82085036	59.73971786	-0.002382599	0.569003284	0.380392164	0	83.5751	979.8672	655.7619	2.2246	2.12	420	1.416240693	0.003271516	19.23363604	0.044429699
7.699428356	×ÔÉí³µÁ¾	Road 1	63.09336931	59.77281418	-0.002218305	0.54272449	0.380392164	0	83.9229	979.8916	655.7621	2.2056	2.1371	421	1.806210989	0.004172347	19.26328189	0.044498181
7.73273768	×ÔÉí³µÁ¾	Road 1	63.64675302	59.80851974	-0.002088554	0.521413565	0.380392164	0	84.3205	979.9189	655.7625	2.1855	2.1573	422	1.319058453	0.003047025	19.30721884	0.044599676
7.749346705	×ÔÉí³µÁ¾	Road 1	63.92285796	59.8456398	-0.00195393	0.507827759	0.380392164	0	84.7516	979.9492	655.7628	2.163	2.1798	423	1.920980304	0.004437465	19.33912445	0.044673377
7.765991287	×ÔÉí³µÁ¾	Road 1	64.19964426	59.865168	-0.001686673	0.502101898	0.380392164	0	84.9838	979.9648	655.763	2.1516	2.1903	424	1.372501959	0.00317048	19.36196917	0.044726149
7.782664093	×ÔÉí³µÁ¾	Road 1	64.47702708	59.89262695	-0.001572592	0.496054977	0.380392164	0	85.3157	979.9883	655.7633	2.1342	2.2078	425	1.618071897	0.003737746	19.38894697	0.044788467
7.799443934	×ÔÉí³µÁ¾	Road 1	64.75627915	59.91161957	-0.001453177	0.493072122	0.380392164	0	85.5481	980.0049	655.7635	2.1218	2.2202	426	1.35191793	0.00312293	19.41163194	0.04484087
7.816019603	×ÔÉí³µÁ¾	Road 1	65.03222022	59.93048172	-0.001353363	0.490043074	0.380392164	0	85.7805	980.0205	655.7637	2.1104	2.2316	427	1.35539364	0.003130959	19.43409849	0.044892768
7.832657954	×ÔÉí³µÁ¾	Road 1	65.30933439	59.95853119	-0.001259296	0.486771703	0.380392164	0	86.1294	980.0449	655.7639	2.0923	2.2487	428	1.639670942	0.00378764	19.46137991	0.044955788
7.849413968	×ÔÉí³µÁ¾	Road 1	65.58850101	59.97845078	-0.001158546	0.485311449	0.372549027	0	86.3786	980.0625	655.7642	2.0793	2.2617	429	1.382591275	0.003193786	19.48454663	0.045009303
7.866525543	×ÔÉí³µÁ¾	Road 1	65.87368541	59.99821243	-0.001073846	0.481666982	0.372549027	0	86.628	980.0801	655.7643	2.0662	2.2748	430	1.365358215	0.003153977	19.50791006	0.045063272
7.882699833	×ÔÉí³µÁ¾	Road 1	66.14336587	60.02425003	-0.000994289	0.476537198	0.372549027	0	86.9606	980.1035	655.7646	2.0489	2.2922	431	1.601729864	0.003699996	19.5338169	0.045123117
7.899359077	×ÔÉí³µÁ¾	Road 1	66.42122144	60.04354477	-0.000908418	0.473126411	0.36470589	0	87.2101	980.1211	655.7648	2.0358	2.3052	432	1.367892857	0.003159833	19.55660496	0.045175757
7.91599706	×ÔÉí³µÁ¾	Road 1	66.69880496	60.06140442	-0.000838175	0.470535159	0.36470589	0	87.4431	980.1367	655.765	2.0244	2.3166	433	1.324222467	0.003058954	19.57863736	0.045226652
7.934245692	×ÔÉí³µÁ¾	Road 1	67.00340041	60.08908997	-0.000773191	0.464177549	0.36470589	0	87.8093	980.1621	655.7653	2.0057	2.3353	434	1.555006176	0.003592064	19.60701409	0.045292203
7.949679538	×ÔÉí³µÁ¾	Road 1	67.26108243	60.1052536	-0.000700044	0.461601526	0.356862754	0	88.0258	980.1777	655.7655	1.994	2.346	435	1.311401407	0.003029337	19.62725406	0.045338957
7.966027943	×ÔÉí³µÁ¾	Road 1	67.53411773	60.12373123	-0.000632336	0.458159268	0.356862754	0	88.2757	980.1953	655.7657	1.981	2.3591	436	1.354798019	0.003129583	19.64940284	0.045390121
7.98266336	×ÔÉí³µÁ¾	Road 1	67.81206407	60.14918518	-0.000583725	0.451777816	0.356862754	0	88.6256	980.2197	655.766	1.9629	2.3771	437	1.563019587	0.003610575	19.67540433	0.045450184
7.999437703	×ÔÉí³µÁ¾	Road 1	68.09241528	60.16714783	-0.000523868	0.448767573	0.349019617	0	88.8757	980.2373	655.7662	1.9499	2.3902	438	1.324681071	0.003060013	19.69762498	0.045501514
8.015993578	×ÔÉí³µÁ¾	Road 1	68.36919138	60.18370972	-0.000474906	0.443665296	0.34117648	0	89.1091	980.2529	655.7664	1.9385	2.4016	439	1.288319013	0.002976017	19.71895423	0.045550784
8.03262533	×ÔÉí³µÁ¾	Road 1	68.64734847	60.20805817	-0.000428573	0.43516019	0.34117648	0	89.4594	980.2783	655.7667	1.9195	2.4206	440	1.529860681	0.003533978	19.74439849	0.045609561
8.049338824	×ÔÉí³µÁ¾	Road 1	68.92694609	60.22387848	-0.000380528	0.429226041	0.34117648	0	89.693	980.2939	655.7668	1.9081	2.432	441	1.260983094	0.002912871	19.76547393	0.045658245
8.066326869	×ÔÉí³µÁ¾	Road 1	69.2112155	60.24059143	-0.000341108	0.425350398	0.34117648	0	89.9434	980.3115	655.767	1.8951	2.445	442	1.280634377	0.002958265	19.7872294	0.0457085
8.082651081	×ÔÉí³µÁ¾	Road 1	69.48448653	60.26482315	-0.000302855	0.421882808	0.34117648	0	90.3107	980.3379	655.7673	1.8754	2.4647	443	1.541658981	0.003561232	19.81239577	0.045766634
8.099369707	×ÔÉí³µÁ¾	Road 1	69.76443117	60.28011475	-0.00026379	0.419747055	0.34117648	0	90.5445	980.3535	655.7675	1.864	2.476	444	1.245259014	0.002876548	19.83321479	0.045814726
8.11601942	×ÔÉí³µÁ¾	Road 1	70.04329212	60.29529648	-0.000231674	0.418023616	0.34117648	0	90.7784	980.3701	655.7677	1.8516	2.4884	445	1.244032032	0.002873714	19.85392757	0.045862573
8.132711288	×ÔÉí³µÁ¾	Road 1	70.32296399	60.31792145	-0.000202277	0.415836304	0.34117648	0	91.1293	980.3945	655.7679	1.8336	2.5064	446	1.475556168	0.003408535	19.87855735	0.045919467
8.149348172	×ÔÉí³µÁ¾	Road 1	70.60178408	60.33295212	-0.000171209	0.41535297	0.34117648	0	91.3633	980.4111	655.7682	1.8213	2.5188	447	1.240255151	0.002864989	19.89919134	0.045967132
8.166051769	×ÔÉí³µÁ¾	Road 1	70.88182628	60.35537796	-0.000146021	0.414042801	0.34117648	0	91.7145	980.4355	655.7684	1.8032	2.5368	448	1.469574213	0.003394716	19.92373851	0.046023836
8.183440459	×ÔÉí³µÁ¾	Road 1	71.17342631	60.37027817	-0.000122302	0.413149267	0.34117648	0	91.9487	980.4521	655.7687	1.7908	2.5492	449	1.216547136	0.002810224	19.94489267	0.046072702
8.199332135	×ÔÉí³µÁ¾	Road 1	71.43999251	60.38622894	-9.91E-05	0.413078636	0.34117648	0	92.1996	980.4697	655.7689	1.7778	2.5622	450	1.29339853	0.002987751	19.96544694	0.046120182
8.216058458	×ÔÉí³µÁ¾	Road 1	71.72066253	60.40849686	-8.15E-05	0.411751419	0.34117648	0	92.5511	980.4941	655.7692	1.7597	2.5802	451	1.464724218	0.003383513	19.98994639	0.046176776
8.23271477	×ÔÉí³µÁ¾	Road 1	72.00022633	60.42332153	-6.51E-05	0.412119597	0.34117648	0	92.7855	980.5107	655.7693	1.7473	2.5916	452	1.234657088	0.002852058	20.01051123	0.046224281
8.249338458	×ÔÉí³µÁ¾	Road 1	72.27931095	60.43813248	-5.03E-05	0.411243349	0.34117648	0	93.0199	980.5273	655.7695	1.735	2.6039	453	1.235367012	0.002853698	20.03104758	0.04627172
8.265940519	×ÔÉí³µÁ¾	Road 1	72.55813475	60.46030426	-3.91E-05	0.41115278	0.34117648	0	93.3717	980.5518	655.7698	1.7169	2.6219	454	1.467904411	0.003390859	20.05541782	0.046328015
8.282762147	×ÔÉí³µÁ¾	Road 1	72.84071518	60.4750946	-3.01E-05	0.411112875	0.34117648	0	93.6062	980.5684	655.77	1.7045	2.6343	455	1.229820798	0.002840886	20.07610541	0.046375803
8.299455481	×ÔÉí³µÁ¾	Road 1	73.12122355	60.49301605	-2.23E-05	0.410655499	0.34117648	0	93.8409	980.585	655.7702	1.6922	2.6466	456	1.331657662	0.003076129	20.09833522	0.046427154
8.316038848	×ÔÉí³µÁ¾	Road 1	73.3999714	60.51197433	-1.70E-05	0.410584182	0.34117648	0	94.1929	980.6094	655.7704	1.6741	2.6646	457	1.368389063	0.003160979	20.12102771	0.046479574
8.332607186	×ÔÉí³µÁ¾	Road 1	73.67853467	60.52675781	-1.29E-05	0.410540074	0.34117648	0	94.4277	980.626	655.7706	1.6617	2.6769	458	1.237428488	0.00285846	20.14152985	0.046526934
8.349778508	×ÔÉí³µÁ¾	Road 1	73.96734122	60.54883347	-9.44E-06	0.409838289	0.34117648	0	94.78	980.6504	655.7709	1.6437	2.695	459	1.443523861	0.00333454	20.16631706	0.046584192
8.365965628	×ÔÉí³µÁ¾	Road 1	74.23966062	60.56357574	-7.23E-06	0.410830766	0.34117648	0	95.0149	980.667	655.7711	1.6313	2.7073	460	1.247663953	0.002882104	20.18651315	0.046630845
8.382782125	×ÔÉí³µÁ¾	Road 1	74.52263703	60.57831802	-5.53E-06	0.409537613	0.34117648	0	95.2499	980.6836	655.7713	1.619	2.7196	461	1.230052473	0.002841421	20.20719832	0.046678628
8.399327003	×ÔÉí³µÁ¾	Road 1	74.80114429	60.60039368	-4.34E-06	0.410322696	0.34117648	0	95.6025	980.708	655.7716	1.6009	2.7376	462	1.469985871	0.003395667	20.23151906	0.046734809
8.415993211	×ÔÉí³µÁ¾	Road 1	75.08176214	60.61512222	-3.48E-06	0.409811169	0.34117648	0	95.8376	980.7246	655.7718	1.5886	2.7499	463	1.234326573	0.002851294	20.2520906	0.046782329
8.433116149	×ÔÉí³µÁ¾	Road 1	75.37014513	60.63088074	-2.87E-06	0.409801185	0.34117648	0	96.0896	980.7422	655.772	1.5755	2.7629	464	1.253729388	0.002896115	20.27355813	0.046831919
8.450041512	×ÔÉí³µÁ¾	Road 1	75.6553043	60.65293579	-2.43E-06	0.409480572	0.34117648	0	96.4425	980.7666	655.7723	1.5575	2.7809	465	1.454643292	0.003360226	20.2981785	0.046888792
8.465972409	×ÔÉí³µÁ¾	Road 1	75.92377377	60.6676506	-2.05E-06	0.410091877	0.34117648	0	96.6778	980.7832	655.7725	1.5451	2.7933	466	1.25606761	0.002901516	20.31818878	0.046935016
8.482658045	×ÔÉí³µÁ¾	Road 1	76.20506435	60.68969193	-1.79E-06	0.409600973	0.34117648	0	97.0309	980.8086	655.7728	1.5261	2.8122	467	1.464728939	0.003383524	20.34262871	0.046991472
8.550110975	×ÔÉí³µÁ¾	Road 1	77.34350108	60.75899506	-1.54E-06	0.408969015	0.34117648	0	98.1415	980.8857	655.7737	1.469	2.8692	468	1.311742655	0.003030126	20.4311096	0.047195863
8.582644666	×ÔÉí³µÁ¾	Road 1	77.89285368	60.78834915	-1.32E-06	0.408889174	0.34117648	0	98.613	980.9189	655.774	1.4443	2.8938	469	1.246673343	0.002879815	20.47166849	0.047289554
8.599378321	×ÔÉí³µÁ¾	Road 1	78.17548066	60.80304337	-1.38E-07	0.409490556	0.356862754	0	98.8489	980.9355	655.7742	1.432	2.9061	470	1.234274121	0.002851173	20.4923224	0.047337265
8.61597635	×ÔÉí³µÁ¾	Road 1	78.45593445	60.82852478	-1.28E-10	0.417209417	0.36470589	0	99.2533	980.9639	655.7745	1.411	2.9271	471	1.579967336	0.003649725	20.51854675	0.047397843
8.632596739	×ÔÉí³µÁ¾	Road 1	78.73683661	60.84380951	6.29E-09	0.424787968	0.372549027	0	99.4893	980.9805	655.7747	1.3987	2.9394	472	1.256724004	0.002903032	20.53943399	0.047446093
8.649370715	×ÔÉí³µÁ¾	Road 1	79.02040759	60.85948563	9.31E-08	0.432315975	0.372549027	0	99.7254	980.9971	655.775	1.3864	2.9517	473	1.264811175	0.002921714	20.5606499	0.047495101
8.665977175	×ÔÉí³µÁ¾	Road 1	79.3012635	60.88481598	3.26E-07	0.442360401	0.380392164	0	100.0965	981.0225	655.7752	1.3678	2.9703	474	1.575957673	0.003640462	20.58682098	0.047555556
8.683593863	×ÔÉí³µÁ¾	Road 1	79.59928562	60.90132294	8.18E-07	0.448635846	0.380392164	0	100.3327	981.0391	655.7754	1.3557	2.9827	475	1.266764075	0.002926225	20.60913717	0.047607107
8.700235879	×ÔÉí³µÁ¾	Road 1	79.8809023	60.91930618	1.75E-06	0.453638077	0.380392164	0	100.5859	981.0566	655.7756	1.343	2.9956	476	1.342625245	0.003101464	20.63148116	0.047658721
8.715990096	×ÔÉí³µÁ¾	Road 1	80.14760806	60.94500046	2.96E-06	0.461096227	0.380392164	0	100.9405	981.082	655.7759	1.3241	3.0146	477	1.632830633	0.003771839	20.65720512	0.047718144
8.732666568	×ÔÉí³µÁ¾	Road 1	80.43001298	60.96359482	4.64E-06	0.464013815	0.380392164	0	101.1938	981.0996	655.7761	1.3111	3.0275	478	1.361507835	0.003145083	20.67991027	0.047770593
8.749314815	×ÔÉí³µÁ¾	Road 1	80.7120207	60.98106308	6.60E-06	0.466068566	0.380392164	0	101.4304	981.1162	655.7763	1.2988	3.0398	479	1.327172191	0.003065768	20.70200536	0.047821632
8.765936304	×ÔÉí³µÁ¾	Road 1	80.99369706	61.0074646	8.76E-06	0.468073457	0.380392164	0	101.7853	981.1406	655.7766	1.2808	3.0578	480	1.611763818	0.003723174	20.72879528	0.047883517
8.782753167	×ÔÉí³µÁ¾	Road 1	81.27876702	61.02516632	1.09E-05	0.470308483	0.388235301	0	102.022	981.1572	655.7768	1.2685	3.0701	481	1.329686862	0.003071577	20.75115644	0.047935171
8.799565631	×ÔÉí³µÁ¾	Road 1	81.56388761	61.05197296	1.34E-05	0.475070655	0.388235301	0	102.3772	981.1826	655.7771	1.2495	3.089	482	1.6159114	0.003732755	20.77832389	0.047997928
8.815985514	×ÔÉí³µÁ¾	Road 1	81.84243285	61.0700386	1.54E-05	0.478167772	0.388235301	0	102.6141	981.1992	655.7773	1.2372	3.1013	483	1.355566895	0.00313136	20.80058214	0.048049345
8.8326147	×ÔÉí³µÁ¾	Road 1	82.12461294	61.08827591	1.73E-05	0.481265575	0.396078438	0	102.851	981.2158	655.7775	1.2249	3.1136	484	1.354020588	0.003127788	20.8230984	0.048101357
8.849340291	×ÔÉí³µÁ¾	Road 1	82.40851434	61.10666428	1.93E-05	0.484974682	0.396078438	0	103.088	981.2324	655.7777	1.2126	3.1258	485	1.355768333	0.003131825	20.84577443	0.048153739
8.866006132	×ÔÉí³µÁ¾	Road 1	82.69153711	61.13594284	2.12E-05	0.491209537	0.403921574	0	103.4606	981.2588	655.778	1.1929	3.1454	486	1.703459415	0.003934991	20.87416401	0.048219319
8.882695801	×ÔÉí³µÁ¾	Road 1	82.9750585	61.15621948	2.31E-05	0.495921105	0.403921574	0	103.7148	981.2764	655.7782	1.1799	3.1583	487	1.417652023	0.003274776	20.89782415	0.048273974
8.899394633	×ÔÉí³µÁ¾	Road 1	83.25883092	61.17677765	2.53E-05	0.500693262	0.403921574	0	103.9521	981.293	655.7784	1.1676	3.1706	488	1.426585489	0.003295412	20.92164647	0.048329003
8.91594391	×ÔÉí³µÁ¾	Road 1	83.54020231	61.20732651	2.75E-05	0.50645715	0.411764711	0	104.3421	981.3203	655.7787	1.1473	3.1913	489	1.752223712	0.004047637	20.9506445	0.048395989
8.93321017	×ÔÉí³µÁ¾	Road 1	83.83385824	61.2269989	3.05E-05	0.510176241	0.411764711	0	104.5796	981.3369	655.7789	1.135	3.2036	490	1.37897097	0.003185423	20.97445417	0.048450989
8.949320313	×ÔÉí³µÁ¾	Road 1	84.1079406	61.24691162	3.50E-05	0.515398622	0.411764711	0	104.8171	981.3535	655.7791	1.1227	3.2159	491	1.430485431	0.003304421	20.9974995	0.048504224
8.966007415	×ÔÉí³µÁ¾	Road 1	84.39197861	61.27707596	3.97E-05	0.518987358	0.411764711	0	105.1736	981.3779	655.7794	1.1047	3.2338	492	1.733610656	0.004004641	21.02642844	0.04857105
8.982956605	×ÔÉí³µÁ¾	Road 1	84.68057331	61.29738007	4.52E-05	0.522305369	0.419607848	0	105.4114	981.3945	655.7795	1.0924	3.2461	493	1.41123744	0.003259958	21.05034777	0.048626303
8.999385285	×ÔÉí³µÁ¾	Road 1	84.96044521	61.32804565	5.30E-05	0.524560988	0.419607848	0	105.7682	981.4199	655.7798	1.0735	3.265	494	1.7660321	0.004079534	21.07936134	0.048693325
9.01594116	×ÔÉí³µÁ¾	Road 1	85.24257922	61.34876175	6.00E-05	0.53134799	0.419607848	0	106.0061	981.4365	655.78	1.0612	3.2773	495	1.440443666	0.003327425	21.10320915	0.048748413
9.032652089	×ÔÉí³µÁ¾	Road 1	85.52745244	61.36963577	6.79E-05	0.533352911	0.419607848	0	106.2442	981.4531	655.7802	1.0489	3.2896	496	1.439685786	0.003325674	21.12726764	0.048803988
9.049437061	×ÔÉí³µÁ¾	Road 1	85.81373475	61.4011322	7.63E-05	0.536410153	0.419607848	0	106.6014	981.4785	655.7805	1.03	3.3085	497	1.773012601	0.004095659	21.1570276	0.048872734
9.065968377	×ÔÉí³µÁ¾	Road 1	86.09578762	61.42223282	8.43E-05	0.537332058	0.419607848	0	106.8396	981.4951	655.7807	1.0177	3.3207	498	1.455138687	0.00336137	21.18108296	0.048928302
9.08255541	×ÔÉí³µÁ¾	Road 1	86.37888852	61.44337463	9.39E-05	0.538164198	0.419607848	0	107.078	981.5117	655.7809	1.0054	3.333	499	1.454578519	0.003360076	21.2052101	0.048984035
9.099358343	×ÔÉí³µÁ¾	Road 1	86.66578027	61.46606827	0.000103102	0.539537847	0.419607848	0	107.3334	981.5293	655.7811	0.9924	3.3459	500	1.495346912	0.003454251	21.23033632	0.049042077
9.115934379	×ÔÉí³µÁ¾	Road 1	86.94895861	61.50095673	0.00011052	0.54024893	0.419607848	0	107.7253	981.5566	655.7814	0.9721	3.3662	501	1.896678041	0.004381326	21.26177572	0.049114702
9.132570163	×ÔÉí³µÁ¾	Road 1	87.23326303	61.52375336	0.000115441	0.541021228	0.427450985	0	107.9809	981.5752	655.7816	0.9582	3.3801	502	1.506973137	0.003481108	21.2868454	0.049172613
9.149278159	×ÔÉí³µÁ¾	Road 1	87.51890061	61.54510117	0.000120506	0.543236315	0.427450985	0	108.2197	981.5918	655.7819	0.9459	3.3923	503	1.45813823	0.003368299	21.31120797	0.04922889
9.165955364	×ÔÉí³µÁ¾	Road 1	87.80416137	61.57738724	0.000122527	0.547526836	0.427450985	0	108.5779	981.6172	655.7821	0.927	3.4112	504	1.808876233	0.004178504	21.34137497	0.049298576
9.182576487	×ÔÉí³µÁ¾	Road 1	88.08856295	61.5990715	0.000123206	0.549742579	0.427450985	0	108.8168	981.6338	655.7823	0.9147	3.4235	505	1.473480541	0.00340374	21.36586587	0.04935515
9.199414976	×ÔÉí³µÁ¾	Road 1	88.37678575	61.6208519	0.000123206	0.550725102	0.435294122	0	109.0558	981.6504	655.7825	0.9024	3.4357	506	1.467967741	0.003391005	21.39058423	0.04941225
9.215982948	×ÔÉí³µÁ¾	Road 1	88.66053659	61.65528717	0.000123206	0.555616915	0.435294122	0	109.4316	981.6768	655.7828	0.8829	3.4553	507	1.88666504	0.004358196	21.42184244	0.049484456
9.235460275	×ÔÉí³µÁ¾	Road 1	88.99423417	61.67741776	0.000123206	0.55930537	0.443137258	0	109.6537	981.6924	655.783	0.8713	3.4669	508	1.385228104	0.003199877	21.44882298	0.049546781
9.252173403	×ÔÉí³µÁ¾	Road 1	89.28072978	61.71102219	0.000123206	0.56628263	0.443137258	0	110.0298	981.7188	655.7833	0.8517	3.4864	509	1.851978396	0.00427807	21.47977533	0.049618281
9.26747419	×ÔÉí³µÁ¾	Road 1	89.5431183	61.73530197	0.000123206	0.570362926	0.450980395	0	110.2864	981.7363	655.7835	0.8388	3.4993	510	1.626595829	0.003757436	21.50466353	0.049675773
9.283445041	×ÔÉí³µÁ¾	Road 1	89.81709924	61.7582222	0.000123206	0.575685799	0.458823532	0	110.5259	981.7529	655.7837	0.8265	3.5115	511	1.546146477	0.003571598	21.5293568	0.049732814
9.299540522	×ÔÉí³µÁ¾	Road 1	90.09337453	61.79318619	0.000123206	0.5824821	0.466666669	0	110.8854	981.7783	655.784	0.8077	3.5304	512	1.940319276	0.004482138	21.56058718	0.049804956
9.315962604	×ÔÉí³µÁ¾	Road 1	90.37537244	61.81874313	0.000123206	0.591353774	0.474509805	0	111.1423	981.7959	655.7842	0.7948	3.5433	513	1.612048064	0.003723831	21.58706036	0.049866109
9.332614883	×ÔÉí³µÁ¾	Road 1	90.66143596	61.84310532	0.000123206	0.606601357	0.490196079	0	111.3822	981.8135	655.7844	0.7816	3.5565	514	1.562740007	0.003609929	21.61308354	0.049926223
9.349346339	×ÔÉí³µÁ¾	Road 1	90.94897542	61.86802368	0.000123206	0.618951321	0.498039216	0	111.6221	981.8301	655.7845	0.7693	3.5688	515	1.577314073	0.003643596	21.6394743	0.049987186
9.365986522	×ÔÉí³µÁ¾	Road 1	91.23513364	61.9085495	0.000123206	0.640743673	0.513725519	0	111.9994	981.8564	655.7849	0.7498	3.5883	516	2.084063243	0.004814186	21.6741535	0.050067295
9.382636602	×ÔÉí³µÁ¾	Road 1	91.5215855	61.93523941	0.000123206	0.655550241	0.529411793	0	112.2397	981.873	655.7851	0.7376	3.6005	517	1.639522505	0.003787297	21.70145168	0.050130353
9.399374655	×ÔÉí³µÁ¾	Road 1	91.8096879	61.96471024	0.00012366	0.671528816	0.53725493	0	112.48	981.8896	655.7853	0.7253	3.6127	518	1.724578274	0.003983776	21.73031776	0.050197034
9.415943726	×ÔÉí³µÁ¾	Road 1	92.09507941	62.00766678	0.00012366	0.699377179	0.552941203	0	112.8579	981.916	655.7856	0.7058	3.6322	519	2.171079959	0.005015195	21.76629054	0.050280131
9.432777084	×ÔÉí³µÁ¾	Road 1	92.38516209	62.03739166	0.00012366	0.716098189	0.56078434	0	113.0985	981.9336	655.7858	0.6926	3.6454	520	1.728994047	0.003993976	21.79539532	0.050347363
9.449240587	×ÔÉí³µÁ¾	Road 1	92.66904133	62.07459412	0.000123887	0.732567668	0.56078434	0	113.3392	981.9502	655.786	0.6804	3.6577	521	1.994644645	0.004607629	21.82823415	0.050423221
9.466130762	×ÔÉí³µÁ¾	Road 1	92.96047876	62.1174614	0.000125258	0.752455592	0.56078434	0	113.7177	981.9766	655.7863	0.6609	3.6772	522	2.145109218	0.004955202	21.86446542	0.050506915
9.482598663	×ÔÉí³µÁ¾	Road 1	93.24477715	62.14964447	0.000127564	0.760717392	0.56078434	0	113.9588	981.9932	655.7864	0.6487	3.6894	523	1.832755734	0.004233666	21.89464706	0.050576635
9.499378871	×ÔÉí³µÁ¾	Road 1	93.53461871	62.182164	0.000129663	0.766781926	0.56078434	0	114.2	982.0107	655.7867	0.6355	3.7026	524	1.824786475	0.004215257	21.92526736	0.050647368
9.515996694	×ÔÉí³µÁ¾	Road 1	93.82188263	62.23138275	0.000132023	0.773126483	0.56078434	0	114.562	982.0361	655.787	0.6167	3.7224	525	2.376256791	0.005489153	21.96475557	0.050738585
9.532599854	×ÔÉí³µÁ¾	Road 1	94.1090456	62.2644516	0.000133931	0.776705265	0.56078434	0	114.8034	982.0527	655.7872	0.6045	3.7346	526	1.855714817	0.004286701	21.99556631	0.050809758
9.54933131	×ÔÉí³µÁ¾	Road 1	94.3986481	62.31191254	0.000137558	0.778621078	0.56078434	0	115.0451	982.0693	655.7874	0.5923	3.7468	527	2.311585732	0.005339763	22.0342425	0.0508991
9.565880587	×ÔÉí³µÁ¾	Road 1	94.6852614	62.34761124	0.000140507	0.780895293	0.56078434	0	115.4077	982.0947	655.7877	0.5735	3.7656	528	1.946860943	0.004497249	22.06646164	0.050973526
9.582568789	×ÔÉí³µÁ¾	Road 1	94.9744357	62.38104401	0.000143497	0.782839656	0.56078434	0	115.6497	982.1123	655.7878	0.5603	3.7788	529	1.864908218	0.004307938	22.09758361	0.051045418
9.599307575	×ÔÉí³µÁ¾	Road 1	95.26471988	62.43123093	0.000146021	0.78308183	0.56078434	0	116.0128	982.1377	655.7881	0.5415	3.7976	530	2.402564614	0.005549924	22.13779962	0.051138317
9.632658687	×ÔÉí³µÁ¾	Road 1	95.84371624	62.49827499	0.000147805	0.785105288	0.56078434	0	116.4975	982.1709	655.7885	0.5171	3.822	531	1.871268476	0.00432263	22.20020851	0.051282482
9.649323062	×ÔÉí³µÁ¾	Road 1	96.13326432	62.5509819	0.000149862	0.784925699	0.56078434	0	116.8786	982.1982	655.7888	0.4967	3.8424	532	2.495509916	0.005764628	22.24179462	0.051378546
9.66587124	×ÔÉí³µÁ¾	Road 1	96.42094773	62.584552	0.000155882	0.785475791	0.56078434	0	117.1214	982.2148	655.7891	0.4845	3.8546	533	1.883666446	0.004351269	22.27296587	0.051450551
9.682589133	×ÔÉí³µÁ¾	Road 1	96.71181546	62.63491745	0.000171774	0.785115242	0.56078434	0	117.4857	982.2402	655.7893	0.4657	3.8733	534	2.417229692	0.005583801	22.31337685	0.051543901
9.699285032	×ÔÉí³µÁ¾	Road 1	97.0024562	62.66848068	0.000190524	0.78519398	0.56078434	0	117.7288	982.2578	655.7896	0.4526	3.8865	535	1.875849834	0.004333213	22.34469585	0.051616247
9.715976533	×ÔÉí³µÁ¾	Road 1	97.29317604	62.70205765	0.000214832	0.785506129	0.56078434	0	117.972	982.2744	655.7897	0.4404	3.8987	536	1.877426879	0.004336856	22.37603293	0.051688636
9.732559533	×ÔÉí³µÁ¾	Road 1	97.58223805	62.75240936	0.000239003	0.785337329	0.56078434	0	118.337	982.2998	655.79	0.4216	3.9174	537	2.434038236	0.005622628	22.41639658	0.051781876
9.749288423	×ÔÉí³µÁ¾	Road 1	97.87399908	62.78597946	0.000267574	0.7852391	0.56078434	0	118.5805	982.3174	655.7902	0.4085	3.9306	538	1.876877124	0.004335586	22.44779465	0.051854406
9.767801341	×ÔÉí³µÁ¾	Road 1	98.19713338	62.83631058	0.00029144	0.784662724	0.56078434	0	118.946	982.3428	655.7905	0.3897	3.9493	539	2.264472142	0.005230931	22.48971664	0.051951245
9.783882526	×ÔÉí³µÁ¾	Road 1	98.47797275	62.86985321	0.00031414	0.784747005	0.56078434	0	119.1898	982.3594	655.7907	0.3776	3.9615	540	1.921958517	0.004439724	22.52062401	0.052022641
9.799564898	×ÔÉí³µÁ¾	Road 1	98.75200396	62.90581284	0.000341555	0.784861028	0.56078434	0	119.4512	982.3779	655.7909	0.3638	3.9753	541	2.035453994	0.004701899	22.55254476	0.052096378
9.815908537	×ÔÉí³µÁ¾	Road 1	99.03774229	62.9393486	0.000368164	0.784756005	0.56078434	0	119.6954	982.3945	655.7911	0.3516	3.9875	542	1.905309426	0.004401265	22.58368445	0.052168311
9.832553485	×ÔÉí³µÁ¾	Road 1	99.32898117	62.98967972	0.000395134	0.785010517	0.56078434	0	120.0618	982.4209	655.7914	0.3319	4.0072	543	2.435287506	0.005625514	22.62421968	0.052261947
9.849311699	×ÔÉí³µÁ¾	Road 1	99.62235798	63.02321548	0.000422874	0.784885764	0.56078434	0	120.3062	982.4375	655.7916	0.3197	4.0193	544	1.87980923	0.004342359	22.65572193	0.052334718
9.86591486	×ÔÉí³µÁ¾	Road 1	99.91325224	63.07349167	0.000441185	0.78474319	0.56078434	0	120.6731	982.4639	655.7919	0.3	4.039	545	2.440474193	0.005637495	22.69624151	0.052428318
9.901004914	×ÔÉí³µÁ¾	Road 1	100.528838	63.15489349	0.000453501	0.784481823	0.56078434	0	121.2677	982.5049	655.7924	0.2698	4.0692	546	2.056494975	0.004750503	22.76840403	0.052595013
9.916627903	×ÔÉí³µÁ¾	Road 1	100.8030579	63.18840866	0.000463847	0.784772515	0.56078434	0	121.5128	982.5225	655.7926	0.2567	4.0824	547	1.962615324	0.004533641	22.79906595	0.052665842
9.932567598	×ÔÉí³µÁ¾	Road 1	101.0829852	63.22191696	0.000509134	0.783857703	0.56078434	0	121.758	982.5391	655.7928	0.2446	4.0945	548	1.939980097	0.004481354	22.82998864	0.052737274
9.949329111	×ÔÉí³µÁ¾	Road 1	101.3775008	63.2553978	0.000536462	0.784163177	0.56078434	0	122.0033	982.5566	655.793	0.2314	4.1076	549	1.883624621	0.004351173	22.86156104	0.052810206
9.965936304	×ÔÉí³µÁ¾	Road 1	101.6695477	63.30804291	0.000556038	0.783964574	0.56078434	0	122.3891	982.583	655.7933	0.2121	4.127	550	2.526012716	0.005835089	22.90351102	0.05290711
9.982557792	×ÔÉí³µÁ¾	Road 1	101.9620005	63.34150314	0.000562876	0.782351732	0.56078434	0	122.6348	982.6006	655.7935	0.199	4.1401	551	1.894311468	0.004375859	22.9349973	0.052979844
9.999269454	×ÔÉí³µÁ¾	Road 1	102.2561918	63.3742424	0.0005635	0.75059855	0.56078434	0	122.8806	982.6182	655.7937	0.1859	4.1532	552	1.865572563	0.004309473	22.96617411	0.053051862
10.01593346	×ÔÉí³µÁ¾	Road 1	102.5496981	63.40746231	0.000561629	0.637425005	0.56078434	0	123.1617	982.6367	655.7939	0.1724	4.1666	553	1.885259489	0.004354949	22.99759009	0.053124433
10.03254689	×ÔÉí³µÁ¾	Road 1	102.842464	63.44009857	0.000561629	0.395305693	0.56078434	0	123.566	982.6631	655.7942	0.1534	4.1857	554	1.870151925	0.004320051	23.02865972	0.053196204
10.04928237	×ÔÉí³µÁ¾	Road 1	103.1374301	63.45067291	0.000561629	0.275316715	0.56078434	0	123.8124	982.6777	655.7944	0.1432	4.1959	555	1.139945208	0.002633273	23.04773726	0.053240273
10.06595371	×ÔÉí³µÁ¾	Road 1	103.4312917	63.45631714	0.000561629	0.187699795	0.56078434	0	124.0588	982.6904	655.7945	0.135	4.2051	556	0.97920234	0.002261957	23.06406188	0.053277983
10.08255944	×ÔÉí³µÁ¾	Road 1	103.7240287	63.46322479	0.000561629	0.20098044	0.56078434	0	124.4288	982.7061	655.7947	0.1271	4.217	557	1.021733804	0.002360205	23.08102851	0.053317176
10.09923188	×ÔÉí³µÁ¾	Road 1	104.0179755	63.47053757	0.000561629	0.25155133	0.56078434	0	124.6756	982.7148	655.7947	0.1228	4.2233	558	1.0342307	0.002389073	23.09827166	0.053357008
10.11592851	×ÔÉí³µÁ¾	Road 1	104.3124007	63.48169556	0.000561629	0.310385764	0.56078434	0	124.9225	982.7217	655.7947	0.1215	4.2296	559	1.160336363	0.002680377	23.11764537	0.053401761
10.13259729	×ÔÉí³µÁ¾	Road 1	104.6064569	63.50811081	0.000561629	0.414230108	0.56078434	0	125.3108	982.7314	655.7948	0.1207	4.2402	560	1.663518849	0.003842729	23.14537419	0.053465814
10.14928182	×ÔÉí³µÁ¾	Road 1	104.900893	63.53009033	0.000561629	0.471797287	0.56078434	0	125.5579	982.7373	655.7948	0.1204	4.2485	561	1.517261414	0.003504874	23.17068899	0.053524292
10.16587546	×ÔÉí³µÁ¾	Road 1	105.193906	63.56936646	0.000561629	0.546394825	0.56078434	0	125.9289	982.7441	655.7948	0.1233	4.2604	562	2.094340309	0.004837926	23.2054417	0.05360457
10.18262011	×ÔÉí³µÁ¾	Road 1	105.4897234	63.59898148	0.000561629	0.589850843	0.56078434	0	126.1763	982.749	655.7948	0.1249	4.2696	563	1.766505935	0.004080629	23.23502123	0.053672899
10.19926652	×ÔÉí³µÁ¾	Road 1	105.7839628	63.63303223	0.000561629	0.63224715	0.56078434	0	126.4415	982.7539	655.7948	0.1278	4.2805	564	1.91949079	0.004434024	23.26697387	0.05374671
10.21587555	×ÔÉí³µÁ¾	Road 1	106.0776956	63.666465	0.000561629	0.669743299	0.56078434	0	126.6891	982.7588	655.7948	0.1295	4.2908	565	1.902413795	0.004394576	23.2985711	0.053819699
10.23259894	×ÔÉí³µÁ¾	Road 1	106.3737172	63.72378616	0.000561629	0.714853346	0.56078434	0	127.0961	982.7656	655.7948	0.134	4.307	566	2.682360047	0.006196252	23.34342926	0.053923322
10.24932929	×ÔÉí³µÁ¾	Road 1	106.6700283	63.75954666	0.000561629	0.737090945	0.56078434	0	127.344	982.7705	655.7948	0.1357	4.3172	567	1.973336823	0.004558408	23.37644389	0.053999585
10.26591303	×ÔÉí³µÁ¾	Road 1	106.9639901	63.81328354	0.000558518	0.78775537	0.56078434	0	127.7161	982.7773	655.7948	0.1396	4.332	568	2.582530687	0.005965646	23.41927189	0.054098518
10.28344248	×ÔÉí³µÁ¾	Road 1	107.2748895	63.8490097	0.000554801	0.773674786	0.56078434	0	127.9643	982.7822	655.7948	0.1412	4.3423	569	1.920855827	0.004437177	23.45294343	0.054176299
10.30102068	×ÔÉí³µÁ¾	Road 1	107.5869128	63.90209427	0.000549256	0.785182178	0.56078434	0	128.3369	982.7891	655.7948	0.1441	4.3542	570	2.464039082	0.00569193	23.4962568	0.054276353
10.33256796	×ÔÉí³µÁ¾	Road 1	108.1475261	63.97405472	0.00054558	0.788421452	0.56078434	0	128.8519	982.7979	655.7948	0.1487	4.3694	571	2.057964397	0.004753898	23.56118	0.054426326
10.34936247	×ÔÉí³µÁ¾	Road 1	108.4461905	64.02046509	0.000541921	0.78889221	0.56078434	0	129.1896	982.8037	655.7948	0.151	4.377	572	2.326285014	0.005373718	23.6002488	0.054516575
10.36663203	×ÔÉí³µÁ¾	Road 1	108.7534661	64.05445404	0.000536462	0.788980126	0.56078434	0	129.4386	982.8076	655.7948	0.1526	4.3813	573	1.887391265	0.004359874	23.63284322	0.054591868
10.38253946	×ÔÉí³µÁ¾	Road 1	109.0366553	64.08833313	0.000531641	0.789064944	0.56078434	0	129.6878	982.8125	655.7948	0.149	4.3817	574	1.97772246	0.004568539	23.66430371	0.054664542
10.40008577	×ÔÉí³µÁ¾	Road 1	109.3492909	64.14386902	0.000522679	0.789897621	0.56078434	0	130.0974	982.8184	655.7948	0.1457	4.3792	575	2.552648273	0.005896618	23.70909327	0.054768005
10.43386026	×ÔÉí³µÁ¾	Road 1	109.9518227	64.22346497	0.000511473	0.789812624	0.56078434	0	130.6857	982.8271	655.7948	0.1427	4.3763	576	2.106709052	0.004866498	23.78024628	0.054932369
10.44927358	×ÔÉí³µÁ¾	Road 1	110.2269386	64.25722046	0.000496973	0.789496243	0.56078434	0	130.9355	982.8301	655.7947	0.1424	4.3738	577	2.015597995	0.004656031	23.81131334	0.055004134
10.46589617	×ÔÉí³µÁ¾	Road 1	110.5237948	64.29097595	0.000461656	0.789805591	0.56078434	0	131.1854	982.833	655.7947	0.143	4.3722	578	1.928003842	0.004453689	23.84336175	0.055078166
10.48264851	×ÔÉí³µÁ¾	Road 1	110.8232038	64.34158173	0.000439066	0.788348556	0.552941203	0	131.5606	982.8379	655.7947	0.144	4.3702	579	2.479463864	0.005727562	23.8848986	0.055174116
10.49930043	×ÔÉí³µÁ¾	Road 1	111.1209733	64.37518616	0.000415184	0.785681069	0.552941203	0	131.8108	982.8408	655.7947	0.1456	4.3686	580	1.923103424	0.004442369	23.91692195	0.05524809
10.51593951	×ÔÉí³µÁ¾	Road 1	111.4186679	64.40863266	0.000382937	0.782163322	0.552941203	0	132.0612	982.8438	655.7946	0.1472	4.367	581	1.919532403	0.00443412	23.94886121	0.055321869
10.53259766	×ÔÉí³µÁ¾	Road 1	111.7169346	64.45857239	0.000352405	0.779444814	0.552941203	0	132.4371	982.8486	655.7946	0.1482	4.3651	582	2.470685173	0.005707283	23.99001824	0.055416942
10.54928952	×ÔÉí³µÁ¾	Road 1	112.0159592	64.49178543	0.000316685	0.779137254	0.552941203	0	132.6878	982.8516	655.7946	0.1498	4.3634	583	1.910290711	0.004412772	24.02190456	0.0554906
10.56589562	×ÔÉí³µÁ¾	Road 1	112.3136765	64.5415123	0.000283465	0.777448177	0.552941203	0	133.0641	982.8555	655.7946	0.1528	4.3605	584	2.471574228	0.005709336	24.06294775	0.055585409
10.58256696	×ÔÉí³µÁ¾	Road 1	112.6127169	64.57462921	0.000250101	0.777337015	0.552941203	0	133.3152	982.8584	655.7945	0.1544	4.3589	585	1.910510269	0.004413279	24.09479851	0.055658985
10.59936916	×ÔÉí³µÁ¾	Road 1	112.9142591	64.60772552	0.000216809	0.776189625	0.552941203	0	133.5664	982.8623	655.7945	0.155	4.3582	586	1.90201577	0.004393656	24.12675656	0.055732808
10.61590194	×ÔÉí³µÁ¾	Road 1	113.2111179	64.64075317	0.00018011	0.77540946	0.552941203	0	133.8177	982.8652	655.7944	0.1567	4.3566	587	1.918442793	0.004431603	24.15847376	0.055806074
10.63252819	×ÔÉí³µÁ¾	Road 1	113.5099057	64.69503937	0.000148574	0.775651634	0.552941203	0	134.2308	982.8701	655.7944	0.1592	4.354	588	2.627905774	0.006070462	24.20216599	0.055907003
10.64927944	×ÔÉí³µÁ¾	Road 1	113.8111044	64.73040848	0.000116312	0.774676323	0.552941203	0	134.5004	982.873	655.7944	0.1612	4.352	589	1.984267659	0.004583658	24.23540495	0.055983785
10.66593245	×ÔÉí³µÁ¾	Road 1	114.1106892	64.76338806	9.15E-05	0.775230825	0.552941203	0	134.7522	982.876	655.7944	0.1628	4.3503	590	1.911829012	0.004416325	24.26724266	0.056057331
10.68252902	×ÔÉí³µÁ¾	Road 1	114.4094867	64.8128746	6.95E-05	0.774211287	0.545098066	0	135.1301	982.8809	655.7943	0.1648	4.3474	591	2.473565551	0.005713936	24.30829535	0.056152162
10.69931766	×ÔÉí³µÁ¾	Road 1	114.7119063	64.84804459	4.80E-05	0.769839466	0.545098066	0	135.4002	982.8838	655.7943	0.1667	4.3454	592	1.978051259	0.004569298	24.34150414	0.056228875
10.71584897	×ÔÉí³µÁ¾	Road 1	115.0098406	64.88070831	3.26E-05	0.767366409	0.545098066	0	135.6525	982.8867	655.7943	0.1683	4.3438	593	1.912214045	0.004417214	24.37311555	0.056301897
10.73253387	×ÔÉí³µÁ¾	Road 1	115.3107689	64.92948074	2.05E-05	0.764465094	0.545098066	0	136.031	982.8916	655.7943	0.1703	4.3418	594	2.444624493	0.005647083	24.41390387	0.056396118
10.74918799	×ÔÉí³µÁ¾	Road 1	115.6112277	64.94802017	1.22E-05	0.764404893	0.545098066	0	136.1753	982.8936	655.7943	0.1709	4.3411	595	1.429880478	0.003303024	24.43771726	0.056451127
10.7993336	×ÔÉí³µÁ¾	Road 1	116.5175849	65.06821747	5.53E-06	0.761624217	0.545098066	0	137.1143	982.9053	655.7942	0.1762	4.3358	596	2.152697766	0.004972732	24.54566562	0.056700488
10.81587518	×ÔÉí³µÁ¾	Road 1	116.8168199	65.1235405	2.19E-06	0.760397553	0.545098066	0	137.5482	982.9102	655.7941	0.1792	4.3328	597	2.687978595	0.006209231	24.59012903	0.056803198
10.83254579	×ÔÉí³µÁ¾	Road 1	117.1185384	65.15578537	-6.29E-09	0.760474086	0.545098066	0	137.8015	982.9141	655.7941	0.1798	4.3321	598	1.895616535	0.004378874	24.62173011	0.056876197
10.8493106	×ÔÉí³µÁ¾	Road 1	117.4221657	65.19955215	-3.35E-07	0.760604978	0.545098066	0	138.055	982.917	655.7941	0.1815	4.3304	599	2.27758314	0.005261217	24.65991336	0.0569644
10.86586977	×ÔÉí³µÁ¾	Road 1	117.722238	65.23636322	-2.11E-06	0.759771407	0.545098066	0	138.4354	982.9209	655.794	0.1844	4.3274	600	2.060304106	0.004759302	24.69403029	0.05704321
10.88252902	×ÔÉí³µÁ¾	Road 1	118.0242727	65.26856689	-5.94E-06	0.759474695	0.545098066	0	138.6891	982.9248	655.794	0.1851	4.3267	601	1.897728705	0.004383753	24.72564502	0.05711624
10.89920476	×ÔÉí³µÁ¾	Road 1	118.3267556	65.30077057	-1.27E-05	0.760217965	0.545098066	0	138.943	982.9277	655.794	0.1868	4.325	602	1.897438358	0.004383083	24.75728621	0.057189331
10.9158651	×ÔÉí³µÁ¾	Road 1	118.629204	65.35363541	-2.41E-05	0.758817792	0.545098066	0	139.3603	982.9326	655.7939	0.1894	4.3223	603	2.599695596	0.006005297	24.80059803	0.057289381
10.93308701	×ÔÉí³µÁ¾	Road 1	118.9420007	65.38580475	-3.82E-05	0.759254456	0.545098066	0	139.6145	982.9355	655.7939	0.1911	4.3206	604	1.863794619	0.004305366	24.83269613	0.057363528
10.94921438	×ÔÉí³µÁ¾	Road 1	119.2350618	65.41797409	-5.56E-05	0.759144485	0.545098066	0	139.8689	982.9385	655.7939	0.1928	4.3189	605	1.936216561	0.00447266	24.86392221	0.05743566
10.96589598	×ÔÉí³µÁ¾	Road 1	119.5384178	65.4662178	-7.89E-05	0.758126795	0.545098066	0	140.2506	982.9434	655.7939	0.1948	4.3169	606	2.4447668	0.005647411	24.90470484	0.057529868
10.98248998	×ÔÉí³µÁ¾	Road 1	119.8403288	65.49835281	-0.000103102	0.759106994	0.545098066	0	140.5052	982.9463	655.7938	0.1964	4.3152	607	1.905314861	0.004401277	24.93632163	0.057602903
10.99934753	×ÔÉí³µÁ¾	Road 1	120.1471854	65.53050842	-0.000130368	0.758996964	0.545098066	0	140.76	982.9502	655.7938	0.1971	4.3145	608	1.889653137	0.004365099	24.96817655	0.057676488
11.01591697	×ÔÉí³µÁ¾	Road 1	120.4490405	65.5833046	-0.000162334	0.758156896	0.545098066	0	141.1788	982.9551	655.7938	0.1998	4.3119	609	2.615295791	0.006041333	25.01151053	0.057776589
11.03251866	×ÔÉí³µÁ¾	Road 1	120.7516315	65.61543961	-0.000192349	0.75827682	0.545098066	0	141.4339	982.958	655.7938	0.2015	4.3102	610	1.907676015	0.004406732	25.04318119	0.057849749
11.04926588	×ÔÉí³µÁ¾	Road 1	121.0570243	65.64756088	-0.000222811	0.758353412	0.545098066	0	141.6891	982.9609	655.7937	0.2032	4.3085	611	1.898458372	0.004385439	25.07497508	0.057923192
11.06587454	×ÔÉí³µÁ¾	Road 1	121.3601338	65.70032959	-0.00025633	0.757990062	0.545098066	0	142.1087	982.9668	655.7937	0.2049	4.3068	612	2.614219634	0.006038847	25.11839377	0.05802349
11.08252535	×ÔÉí³µÁ¾	Road 1	121.6641612	65.73243713	-0.000285445	0.758060038	0.545098066	0	142.3642	982.9697	655.7937	0.2066	4.3051	613	1.906363726	0.0044037	25.15013627	0.058096815
11.11593218	×ÔÉí³µÁ¾	Road 1	122.2746688	65.78976517	-0.000317963	0.758530974	0.545098066	0	142.8209	982.9746	655.7936	0.21	4.3017	614	1.786943557	0.00412784	25.20983239	0.058234713
11.13251078	×ÔÉí³µÁ¾	Road 1	122.5778422	65.83331909	-0.000343348	0.757947505	0.545098066	0	143.1682	982.9795	655.7936	0.2114	4.3003	615	2.306187925	0.005327294	25.24806576	0.058323032
11.14920595	×ÔÉí³µÁ¾	Road 1	122.8833174	65.86999969	-0.000389248	0.758251309	0.545098066	0	143.4608	982.9834	655.7936	0.2127	4.2989	616	2.062654544	0.004764732	25.28250212	0.05840258
11.16631312	×ÔÉí³µÁ¾	Road 1	123.1965925	65.92498627	-0.000412134	0.75763464	0.545098066	0	143.9001	982.9883	655.7935	0.2158	4.2959	617	2.643209923	0.006105815	25.32771998	0.058507033
11.18258822	×ÔÉí³µÁ¾	Road 1	123.4947854	65.95934601	-0.00043118	0.757934749	0.545098066	0	144.1749	982.9922	655.7935	0.2169	4.2948	618	2.016119649	0.004657236	25.36053251	0.05858283
11.19920531	×ÔÉí³µÁ¾	Road 1	123.7993923	65.99139862	-0.000454042	0.75673461	0.545098066	0	144.4314	982.9951	655.7935	0.2187	4.2931	619	1.913040136	0.004419123	25.39232167	0.058656263
11.21588654	×ÔÉí³µÁ¾	Road 1	124.1053981	66.039505	-0.000478818	0.757658064	0.545098066	0	144.8165	983	655.7935	0.2208	4.291	620	2.458895057	0.005680048	25.43333908	0.058751013
11.23257951	×ÔÉí³µÁ¾	Road 1	124.4117782	66.07383728	-0.000505059	0.7568748	0.545098066	0	145.0917	983.0029	655.7935	0.2229	4.289	621	1.987990505	0.004592258	25.46652454	0.058827672
11.2491988	×ÔÉí³µÁ¾	Road 1	124.7169539	66.10586929	-0.000532843	0.756765306	0.545098066	0	145.3487	983.0059	655.7934	0.2246	4.2873	622	1.914985079	0.004423616	25.49835023	0.058901189
11.26588627	×ÔÉí³µÁ¾	Road 1	125.0236043	66.15392761	-0.00056914	0.757025421	0.545098066	0	145.7345	983.0107	655.7933	0.2268	4.2852	623	2.460375762	0.005683468	25.53940768	0.058996032
11.28253158	×ÔÉí³µÁ¾	Road 1	125.3296283	66.18597336	-0.000602467	0.756719291	0.545098066	0	145.9918	983.0137	655.7933	0.2285	4.2835	624	1.915690771	0.004425246	25.57129495	0.059069691
11.29928943	×ÔÉí³µÁ¾	Road 1	125.6379448	66.23399734	-0.000639105	0.756746113	0.545098066	0	146.378	983.0186	655.7933	0.2307	4.2814	625	2.454898972	0.005670817	25.61243378	0.059164722
11.3158673	×ÔÉí³µÁ¾	Road 1	125.9430973	66.26600876	-0.000686418	0.756629467	0.545098066	0	146.6356	983.0225	655.7933	0.2315	4.2806	626	1.920943886	0.00443738	25.64427893	0.059238284
11.33257676	×ÔÉí³µÁ¾	Road 1	126.2508208	66.29802704	-0.000729315	0.756756842	0.545098066	0	146.8933	983.0254	655.7933	0.2332	4.2789	627	1.91325176	0.004419612	25.67624834	0.059312134
11.34929575	×ÔÉí³µÁ¾	Road 1	126.5588683	66.33003159	-0.00077011	0.756217003	0.545098066	0	147.1512	983.0283	655.7932	0.235	4.2772	628	1.912934074	0.004418878	25.70823067	0.059386013
11.36587472	×ÔÉí³µÁ¾	Road 1	126.8645255	66.37117538	-0.000818793	0.75650394	0.545098066	0	147.4645	983.0322	655.7932	0.2368	4.2754	629	2.239219893	0.005172598	25.74535462	0.059471769
11.38254863	×ÔÉí³µÁ¾	Road 1	127.1721446	66.41687851	-0.000858687	0.756097496	0.545098066	0	147.8518	983.0371	655.7932	0.2389	4.2733	630	2.3892927	0.005519266	25.78519347	0.059563797
11.39919871	×ÔÉí³µÁ¾	Road 1	127.479472	66.44884872	-0.000900711	0.756225705	0.545098066	0	148.1101	983.04	655.7932	0.2407	4.2716	631	1.919188893	0.004433326	25.81714811	0.059637612
11.41584329	×ÔÉí³µÁ¾	Road 1	127.7869196	66.49680405	-0.000944965	0.756239474	0.545098066	0	148.4978	983.0449	655.7931	0.2429	4.2694	632	2.472285388	0.005710979	25.85829827	0.059732669
11.43253222	×ÔÉí³µÁ¾	Road 1	128.0953347	66.52877426	-0.000980671	0.755946398	0.545098066	0	148.7565	983.0488	655.7931	0.2437	4.2685	633	1.918567196	0.00443189	25.89031711	0.059806633
11.44917131	×ÔÉí³µÁ¾	Road 1	128.4029763	66.56075134	-0.001009874	0.756253421	0.545098066	0	149.0153	983.0518	655.7931	0.2455	4.2663	634	1.922883156	0.00444186	25.92231213	0.059880541
11.46588077	×ÔÉí³µÁ¾	Road 1	128.7121205	66.60639267	-0.001032154	0.755463779	0.545098066	0	149.3111	983.0557	655.7931	0.247	4.2646	635	2.38975461	0.005520333	25.96224364	0.059972783
11.48254808	×ÔÉí³µÁ¾	Road 1	129.0206748	66.64517441	-0.001040592	0.755300999	0.545098066	0	149.6997	983.0605	655.793	0.2492	4.2624	636	2.15808097	0.004985167	25.99821304	0.060055872
11.49922492	×ÔÉí³µÁ¾	Road 1	129.3295536	66.67712402	-0.001040592	0.755424798	0.545098066	0	149.959	983.0635	655.793	0.251	4.2616	637	1.922266016	0.004440434	26.03027036	0.060129925
11.51589479	×ÔÉí³µÁ¾	Road 1	129.6385253	66.72503128	-0.001040592	0.755735338	0.545098066	0	150.348	983.0684	655.793	0.2532	4.2594	638	2.475561796	0.005718548	26.07153766	0.060225252
11.53258556	×ÔÉí³µÁ¾	Road 1	129.9480321	66.75694656	-0.001036836	0.75533241	0.545098066	0	150.6076	983.0713	655.7929	0.2549	4.2577	639	1.922100153	0.004440051	26.10361899	0.06029936
11.54916966	×ÔÉí³µÁ¾	Road 1	130.2557081	66.78888931	-0.001022831	0.755882978	0.552941203	0	150.8672	983.0752	655.7929	0.2558	4.2569	640	1.930928941	0.004460446	26.13564171	0.060373332
11.56585896	×ÔÉí³µÁ¾	Road 1	130.5655798	66.84150009	-0.001003437	0.75970757	0.552941203	0	151.2941	983.0801	655.7928	0.2587	4.254	641	2.640102306	0.006098636	26.17970317	0.060475114
11.58257612	×ÔÉí³µÁ¾	Road 1	130.8761183	66.87372437	-0.000980671	0.76195842	0.552941203	0	151.554	983.084	655.7928	0.2595	4.2532	642	1.933870787	0.004467242	26.212032	0.060549794
11.59926725	×ÔÉí³µÁ¾	Road 1	131.1863233	66.9060585	-0.00095115	0.764159143	0.552941203	0	151.8142	983.0869	655.7928	0.2623	4.2515	643	1.940202298	0.004481867	26.24441618	0.060624601
11.61584622	×ÔÉí³µÁ¾	Road 1	131.4945929	66.93845444	-0.000917032	0.765319824	0.552941203	0	152.0744	983.0898	655.7928	0.2641	4.2497	644	1.950731762	0.00450619	26.2767573	0.060699309
11.6325161	×ÔÉí³µÁ¾	Road 1	131.8047889	66.98943787	-0.000882056	0.765987575	0.552941203	0	152.4836	983.0957	655.7928	0.2657	4.2481	645	2.59093733	0.005985065	26.3199479	0.06079908
11.64925525	×ÔÉí³µÁ¾	Road 1	132.116425	67.02192307	-0.000842251	0.766542077	0.56078434	0	152.7442	983.0986	655.7927	0.2673	4.2463	646	1.945049703	0.004493065	26.35250638	0.06087429
11.66589617	×ÔÉí³µÁ¾	Road 1	132.4264583	67.07081909	-0.000799712	0.771232426	0.56078434	0	153.1352	983.1035	655.7927	0.2693	4.2442	647	2.524152185	0.005830792	26.39451059	0.060971319
11.68273649	×ÔÉí³µÁ¾	Road 1	132.7403602	67.10363388	-0.000760154	0.774943173	0.56078434	0	153.3961	983.1074	655.7927	0.2702	4.2433	648	1.951640397	0.004508289	26.42737684	0.061047241
11.70029013	×ÔÉí³µÁ¾	Road 1	133.0677993	67.15306549	-0.000718245	0.777563334	0.56078434	0	153.7877	983.1123	655.7927	0.2724	4.2411	649	2.455942297	0.005673227	26.47048757	0.061146826
11.71588086	×ÔÉí³µÁ¾	Road 1	133.3587663	67.18612747	-0.000668762	0.77847892	0.56078434	0	154.0489	983.1152	655.7926	0.2742	4.2394	650	2.053530582	0.004743656	26.50250362	0.061220783
11.73249465	×ÔÉí³µÁ¾	Road 1	133.668979	67.21919632	-0.00062294	0.778183043	0.56078434	0	154.3102	983.1191	655.7926	0.275	4.2385	651	1.978794632	0.004571016	26.5353789	0.061296725
11.74927486	×ÔÉí³µÁ¾	Road 1	133.9825308	67.26892319	-0.000586287	0.780737162	0.568627477	0	154.7024	983.124	655.7926	0.2773	4.2363	652	2.545312087	0.005879671	26.57808976	0.061395387
11.76585529	×ÔÉí³µÁ¾	Road 1	134.2925028	67.3021843	-0.000546192	0.783602655	0.568627477	0	154.9641	983.127	655.7925	0.2791	4.2345	653	1.989937055	0.004596755	26.61108378	0.061471604
11.78251967	×ÔÉí³µÁ¾	Road 1	134.6042769	67.35244675	-0.000513819	0.787732124	0.568627477	0	155.3568	983.1318	655.7925	0.2814	4.2323	654	2.578778879	0.005956979	26.65405752	0.061570873
11.79926139	×ÔÉí³µÁ¾	Road 1	134.9175872	67.37164536	-0.000483878	0.789309204	0.568627477	0	155.4878	983.1338	655.7925	0.2818	4.2319	655	1.491573501	0.003445535	26.67902903	0.061628557
11.81583229	×ÔÉí³µÁ¾	Road 1	135.2279335	67.42220306	-0.000454583	0.791920304	0.568627477	0	155.8996	983.1396	655.7925	0.2834	4.2303	656	2.601422966	0.006009287	26.72213696	0.061728136
11.83254029	×ÔÉí³µÁ¾	Road 1	135.5410824	67.4728363	-0.00043275	0.791560471	0.568627477	0	156.293	983.1445	655.7925	0.2857	4.2281	657	2.591194038	0.005985658	26.76543062	0.061828145
11.8491933	×ÔÉí³µÁ¾	Road 1	135.8533011	67.49454117	-0.000412134	0.792290986	0.568627477	0	156.4242	983.1465	655.7925	0.2862	4.2276	658	1.585066949	0.003661505	26.79182675	0.06188912
11.86590716	×ÔÉí³µÁ¾	Road 1	136.166885	67.54286041	-0.000389248	0.792947531	0.568627477	0	156.8368	983.1514	655.7924	0.2898	4.2251	659	2.512198843	0.005803179	26.8338153	0.061986113
11.88255651	×ÔÉí³µÁ¾	Road 1	136.4794149	67.57669144	-0.000370993	0.793674767	0.568627477	0	157.0995	983.1543	655.7924	0.2916	4.2232	660	2.011963782	0.004647636	26.86731318	0.062063493
11.89929053	×ÔÉí³µÁ¾	Road 1	136.793703	67.61298065	-0.000355612	0.79473418	0.568627477	0	157.3811	983.1582	655.7924	0.2928	4.222	661	2.092666316	0.004834059	26.9023319	0.062144387
11.9158783	×ÔÉí³µÁ¾	Road 1	137.1055006	67.66861954	-0.000337989	0.794536591	0.568627477	0	157.8133	983.1641	655.7924	0.2948	4.2201	662	2.787016652	0.006438008	26.94856228	0.062251179
11.93250492	×ÔÉí³µÁ¾	Road 1	137.4181848	67.70247803	-0.000324404	0.793919861	0.568627477	0	158.0765	983.167	655.7923	0.2967	4.2183	663	2.017741627	0.004660983	26.9821105	0.062328675
11.94929465	×ÔÉí³µÁ¾	Road 1	137.7340946	67.73631592	-0.000313295	0.793819964	0.568627477	0	158.3398	983.1709	655.7923	0.2976	4.2174	664	2.00630413	0.004634563	27.01579583	0.062406488
11.96589305	×ÔÉí³µÁ¾	Road 1	138.0466494	67.78952408	-0.000302855	0.794006526	0.568627477	0	158.7539	983.1758	655.7922	0.3003	4.2148	665	2.704480905	0.006247351	27.06068587	0.062510184
11.98248815	×ÔÉí³µÁ¾	Road 1	138.3592981	67.8233757	-0.000295077	0.794066668	0.568627477	0	159.0175	983.1797	655.7922	0.3011	4.2139	666	2.022833933	0.004672746	27.09425499	0.062587729
11.99915216	×ÔÉí³µÁ¾	Road 1	138.6734018	67.85722733	-0.000288632	0.793871462	0.568627477	0	159.2814	983.1826	655.7922	0.303	4.212	667	2.018748369	0.004663309	27.12789544	0.062665438
12.04926625	×ÔÉí³µÁ¾	Road 1	139.6195614	67.96839523	-0.000285445	0.793574452	0.568627477	0	160.0358	983.1924	655.7921	0.307	4.2081	668	2.130563102	0.004921601	27.23466667	0.06291208
12.06588077	×ÔÉí³µÁ¾	Road 1	139.9334685	68.01673508	-0.00028386	0.793784618	0.568627477	0	160.5268	983.1992	655.7921	0.3091	4.206	669	2.538608326	0.005864185	27.27684444	0.063009511
12.08253342	×ÔÉí³µÁ¾	Road 1	140.2483416	68.06985397	-0.000281888	0.793571651	0.568627477	0	160.9426	983.2051	655.7921	0.3108	4.2043	670	2.705135536	0.006248863	27.3218921	0.063113571
12.09917103	×ÔÉí³µÁ¾	Road 1	140.5630868	68.10367126	-0.000281888	0.793877661	0.568627477	0	161.2074	983.208	655.7921	0.3127	4.2024	671	2.025673794	0.004679306	27.35559449	0.063191423
12.11582331	×ÔÉí³µÁ¾	Road 1	140.8782769	68.13987808	-0.000281888	0.793377697	0.568627477	0	161.4912	983.2119	655.7921	0.314	4.2012	672	2.109993547	0.004874085	27.39073069	0.063272588
12.13255807	×ÔÉí³µÁ¾	Road 1	141.195275	68.19299011	-0.000281888	0.793587863	0.568627477	0	161.9077	983.2168	655.792	0.3167	4.1985	673	2.700026317	0.006237061	27.43591497	0.063376964
12.14923344	×ÔÉí³µÁ¾	Road 1	141.5113046	68.22677307	-0.000281888	0.793034911	0.568627477	0	162.173	983.2207	655.792	0.3176	4.1976	674	2.024867514	0.004677444	27.46968038	0.063454962
12.16698465	×ÔÉí³µÁ¾	Road 1	141.8479735	68.27745438	-0.000281888	0.792841971	0.568627477	0	162.5711	983.2256	655.7919	0.3199	4.1952	675	2.515073049	0.005809819	27.51432599	0.063558093
12.18255229	×ÔÉí³µÁ¾	Road 1	142.1433747	68.31120987	-0.000281888	0.792771935	0.568627477	0	162.8366	983.2295	655.7919	0.3208	4.1943	676	2.111042411	0.004876508	27.54718993	0.063634009
12.19922547	×ÔÉí³µÁ¾	Road 1	142.4599101	68.3449791	-0.000281888	0.792648733	0.568627477	0	163.1023	983.2324	655.7919	0.3227	4.1924	677	2.027528001	0.00468359	27.58099526	0.063712099
12.21588911	×ÔÉí³µÁ¾	Road 1	142.776421	68.37874832	-0.000281888	0.792748868	0.568627477	0	163.3682	983.2363	655.7919	0.3236	4.1915	678	2.029066061	0.004687143	27.61480689	0.063790204
12.23256265	×ÔÉí³µÁ¾	Road 1	143.0933766	68.43420868	-0.000281888	0.792788863	0.568627477	0	163.8052	983.2422	655.7919	0.3256	4.1894	679	2.798635507	0.006464848	27.66147005	0.063897996
12.24918927	×ÔÉí³µÁ¾	Road 1	143.4096074	68.47036057	-0.000281888	0.792198956	0.568627477	0	164.0904	983.2451	655.7918	0.3279	4.1872	680	2.118804824	0.004894439	27.69669861	0.063979374
12.26582322	×ÔÉí³µÁ¾	Road 1	143.7261335	68.50409546	-0.000281888	0.792498887	0.568627477	0	164.3567	983.249	655.7918	0.3288	4.1862	681	2.033155841	0.00469659	27.73051803	0.064057497
12.28248833	×ÔÉí³µÁ¾	Road 1	144.0434866	68.55469437	-0.000281888	0.791898966	0.568627477	0	164.7564	983.2539	655.7917	0.3311	4.1839	682	2.631340704	0.006078397	27.77436961	0.064158794
12.29924471	×ÔÉí³µÁ¾	Road 1	144.3627461	68.59083252	-0.000281888	0.792609036	0.568627477	0	165.0421	983.2578	655.7917	0.3324	4.1826	683	2.111541749	0.004877661	27.80975141	0.064240526
12.31592925	×ÔÉí³µÁ¾	Road 1	144.680793	68.62455368	-0.000281888	0.792078972	0.568627477	0	165.3089	983.2617	655.7917	0.3333	4.1816	684	2.03207041	0.004694083	27.84365556	0.064318844
12.33250675	×ÔÉí³µÁ¾	Road 1	144.9970324	68.67511826	-0.000281888	0.792165816	0.568627477	0	165.7094	983.2666	655.7917	0.3356	4.1793	685	2.643728202	0.006107012	27.88748197	0.064420083
12.34916379	×ÔÉí³µÁ¾	Road 1	145.3149563	68.71122894	-0.000281888	0.791785717	0.568627477	0	165.9956	983.2705	655.7917	0.3369	4.178	686	2.121378772	0.004900385	27.92281787	0.064501709
12.36582524	×ÔÉí³µÁ¾	Road 1	145.6331201	68.74492264	-0.000281888	0.792079151	0.568627477	0	166.2628	983.2734	655.7916	0.3388	4.176	687	2.035793966	0.004702684	27.95673714	0.064580063
12.38255193	×ÔÉí³µÁ¾	Road 1	145.9527647	68.79546661	-0.000281888	0.791515768	0.568627477	0	166.6639	983.2793	655.7916	0.3402	4.1746	688	2.630936612	0.006077464	28.000744	0.064681719
12.39919871	×ÔÉí³µÁ¾	Road 1	146.2710379	68.82913971	-0.000281888	0.791365802	0.568627477	0	166.9315	983.2822	655.7916	0.3421	4.1727	689	2.038244315	0.004708344	28.0346742	0.064760097
12.41582826	×ÔÉí³µÁ¾	Road 1	146.5891373	68.86281967	-0.000281888	0.792065859	0.568627477	0	167.1992	983.2861	655.7916	0.343	4.1717	690	2.040587449	0.004713757	28.06860826	0.064838485
12.43254945	×ÔÉí³µÁ¾	Road 1	146.9092354	68.91572571	-0.000281888	0.790725887	0.568627477	0	167.6202	983.292	655.7916	0.3448	4.1699	691	2.719671636	0.006282441	28.11408441	0.064943535
12.44917277	×ÔÉí³µÁ¾	Road 1	147.2276153	68.94938507	-0.000281888	0.79117924	0.568627477	0	167.8883	983.2949	655.7915	0.3467	4.168	692	2.042490114	0.004718152	28.14803738	0.065021966
12.46587637	×ÔÉí³µÁ¾	Road 1	147.547689	68.9830513	-0.00028386	0.790819168	0.568627477	0	168.1564	983.2988	655.7915	0.3476	4.167	693	2.037786227	0.004707286	28.18207574	0.065100595
12.48253048	×ÔÉí³µÁ¾	Road 1	147.8670589	69.03590927	-0.00028386	0.791059256	0.568627477	0	168.5781	983.3037	655.7914	0.3504	4.1642	694	2.729772357	0.006305774	28.22753768	0.065205612
12.49923152	×ÔÉí³µÁ¾	Road 1	148.1874958	69.07195816	-0.00028386	0.790929317	0.568627477	0	168.8658	983.3076	655.7914	0.3516	4.1629	695	2.125327708	0.004909507	28.26303284	0.065287606
12.53250602	×ÔÉí³µÁ¾	Road 1	148.8263662	69.11999588	-0.00028386	0.790769339	0.568627477	0	169.2497	983.3125	655.7914	0.3537	4.1609	696	1.699658223	0.00392621	28.31958812	0.065418249
12.5491539	×ÔÉí³µÁ¾	Road 1	149.1463499	69.19445572	-0.00028386	0.790509343	0.568627477	0	169.8452	983.3203	655.7914	0.3566	4.1579	697	3.51126997	0.008111034	28.37804332	0.06555328
12.56586629	×ÔÉí³µÁ¾	Road 1	149.4677518	69.2328598	-0.00028386	0.790449381	0.568627477	0	170.1528	983.3242	655.7913	0.3583	4.1563	698	2.212974003	0.00511197	28.41502742	0.065638713
12.58246579	×ÔÉí³µÁ¾	Road 1	149.7871374	69.26646423	-0.00028386	0.790259361	0.568627477	0	170.422	983.3281	655.7913	0.3593	4.1553	699	2.050264068	0.00473611	28.44906077	0.06571733
12.59924233	×ÔÉí³µÁ¾	Road 1	150.1100861	69.30005493	-0.00028386	0.789735973	0.568627477	0	170.6915	983.332	655.7913	0.3602	4.1544	700	2.037831302	0.00470739	28.48324853	0.065796304
12.61587078	×ÔÉí³µÁ¾	Road 1	150.430439	69.35524063	-0.00028386	0.789939404	0.568627477	0	171.1344	983.3379	655.7913	0.3624	4.1522	701	2.82778584	0.006532185	28.53027023	0.065904924
12.63247687	×ÔÉí³µÁ¾	Road 1	150.7505159	69.38881073	-0.00028386	0.789409339	0.568627477	0	171.4041	983.3408	655.7913	0.3643	4.1503	702	2.051634728	0.004739276	28.56433987	0.065983625
12.64917277	×ÔÉí³µÁ¾	Road 1	151.0725574	69.43916245	-0.00028386	0.789856136	0.568627477	0	171.809	983.3467	655.7912	0.3658	4.1488	703	2.649190209	0.006119629	28.60857049	0.066085798
12.66578876	×ÔÉí³µÁ¾	Road 1	151.3932124	69.47271881	-0.00028386	0.789129376	0.568627477	0	172.0791	983.3496	655.7912	0.3677	4.1469	704	2.052534525	0.004741355	28.64267538	0.06616458
12.68251289	×ÔÉí³µÁ¾	Road 1	151.7161101	69.50627518	-0.00028386	0.790239573	0.568627477	0	172.3493	983.3535	655.7911	0.3687	4.1459	705	2.045539651	0.004725197	28.67688524	0.066243605
12.69919816	×ÔÉí³µÁ¾	Road 1	152.0384908	69.55660629	-0.00028386	0.789266229	0.568627477	0	172.7549	983.3584	655.7911	0.3712	4.1435	706	2.653577499	0.006129764	28.72116089	0.066345882
12.7158486	×ÔÉí³µÁ¾	Road 1	152.3603538	69.59013519	-0.00028386	0.789546311	0.568627477	0	173.0254	983.3623	655.7911	0.3722	4.1425	707	2.051992696	0.004740103	28.75532749	0.066424807
12.73256467	×ÔÉí³µÁ¾	Road 1	152.683641	69.62369156	-0.00028386	0.789406359	0.568627477	0	173.2961	983.3662	655.7911	0.3732	4.1415	708	2.04907114	0.004733354	28.78957989	0.06650393
12.74913264	×ÔÉí³µÁ¾	Road 1	153.0042294	69.65960312	-0.00028386	0.788476288	0.568627477	0	173.5863	983.3691	655.7911	0.3755	4.1392	709	2.146305649	0.004957966	28.82513982	0.066586073
12.76585053	×ÔÉí³µÁ¾	Road 1	153.3278968	69.69793167	-0.00028386	0.789566338	0.568627477	0	173.8959	983.374	655.791	0.3763	4.1385	710	2.222652072	0.005134326	28.86229788	0.066671908
12.78248192	×ÔÉí³µÁ¾	Road 1	153.6500884	69.74101868	-0.00028386	0.78859961	0.568627477	0	174.2251	983.3779	655.791	0.3783	4.1364	711	2.403365832	0.005551775	28.90226918	0.066764242
12.79924453	×ÔÉí³µÁ¾	Road 1	153.9750452	69.78889847	-0.00028386	0.78924638	0.568627477	0	174.632	983.3828	655.791	0.3808	4.134	712	2.564912582	0.005924948	28.94526382	0.066863559
12.81585209	×ÔÉí³µÁ¾	Road 1	154.2971506	69.82240677	-0.00028386	0.788539648	0.568627477	0	174.9035	983.3867	655.791	0.3819	4.133	713	2.060230254	0.004759132	28.97947921	0.066942597
12.83248311	×ÔÉí³µÁ¾	Road 1	154.6198769	69.85829086	-0.00028386	0.788599789	0.568627477	0	175.1945	983.3906	655.791	0.3832	4.1316	714	2.145616795	0.004956375	29.01516301	0.067025027
12.84916031	×ÔÉí³µÁ¾	Road 1	154.9436879	69.89896774	-0.00028386	0.788679779	0.568627477	0	175.5244	983.3945	655.7909	0.3853	4.1295	715	2.31658746	0.005351317	29.05379721	0.067114272
12.86583788	×ÔÉí³µÁ¾	Road 1	155.2676943	69.93963089	-0.00028386	0.788319826	0.568627477	0	175.8546	983.3994	655.7909	0.3865	4.1285	716	2.317231041	0.005352804	29.092443	0.067203543
12.88247074	×ÔÉí³µÁ¾	Road 1	155.5910087	69.97788391	-0.00028386	0.788169801	0.568627477	0	176.1655	983.4033	655.7909	0.3882	4.1268	717	2.23471844	0.0051622	29.12961274	0.067289405
12.89912191	×ÔÉí³µÁ¾	Road 1	155.9149115	70.02808456	-0.00028386	0.788006485	0.568627477	0	176.5738	983.4092	655.7908	0.3897	4.1252	718	2.668533114	0.006164311	29.17404696	0.067392048
12.91579545	×ÔÉí³µÁ¾	Road 1	156.2394043	70.06153793	-0.00028386	0.788279831	0.568627477	0	176.8462	983.4121	655.7908	0.3918	4.1232	719	2.059432941	0.00475729	29.208385	0.067471369
12.93252984	×ÔÉí³µÁ¾	Road 1	156.5652701	70.10218048	-0.000285445	0.788386464	0.568627477	0	177.1382	983.416	655.7908	0.3932	4.1219	720	2.316161464	0.005350333	29.24714454	0.067560904
12.9491352	×ÔÉí³µÁ¾	Road 1	156.8888438	70.14994354	-0.000287434	0.787959874	0.568627477	0	177.5667	983.4219	655.7908	0.3951	4.12	721	2.588766971	0.005980052	29.29013195	0.067660205
12.96579701	×ÔÉí³µÁ¾	Road 1	157.2136833	70.18578644	-0.000290636	0.787849903	0.568627477	0	177.859	983.4258	655.7908	0.3965	4.1186	722	2.150353748	0.004967317	29.32596074	0.067742969
12.98253287	×ÔÉí³µÁ¾	Road 1	157.5401217	70.21920547	-0.000293862	0.78772229	0.568627477	0	178.132	983.4287	655.7907	0.3985	4.1166	723	2.057616468	0.004753094	29.36039671	0.067822516
12.99917012	×ÔÉí³µÁ¾	Road 1	157.8648134	70.25740356	-0.000299974	0.78759259	0.568627477	0	178.4442	983.4336	655.7907	0.3993	4.1159	724	2.240075319	0.005174574	29.3976654	0.067908607
13.01581507	×ÔÉí³µÁ¾	Road 1	158.18992	70.3146698	-0.000305339	0.787789822	0.568627477	0	178.9127	983.4395	655.7906	0.402	4.1132	725	2.936660775	0.006783686	29.44654597	0.068021521
13.03251316	×ÔÉí³µÁ¾	Road 1	158.5162199	70.3480957	-0.000311608	0.786826968	0.568627477	0	179.1862	983.4434	655.7906	0.403	4.1122	726	2.06383727	0.004767464	29.48100813	0.068101129
13.04926588	×ÔÉí³µÁ¾	Road 1	158.8437424	70.38148041	-0.00031839	0.787387073	0.568627477	0	179.4598	983.4463	655.7906	0.4051	4.1101	727	2.059210888	0.004756777	29.5155055	0.068180818
13.06581552	×ÔÉí³µÁ¾	Road 1	159.1675359	70.43395386	-0.000324836	0.787017107	0.568627477	0	179.7531	983.4502	655.7906	0.4065	4.1087	728	2.777050743	0.006414987	29.5614647	0.068286983
13.0824788	×ÔÉí³µÁ¾	Road 1	159.4937183	70.46972809	-0.000330931	0.787480175	0.568627477	0	180.1836	983.4561	655.7905	0.4085	4.1067	729	2.15521736	0.004978552	29.59737768	0.068369942
13.09916553	×ÔÉí³µÁ¾	Road 1	159.8205147	70.50311966	-0.000337989	0.786720097	0.568627477	0	180.4577	983.46	655.7905	0.4095	4.1057	730	2.067302192	0.004775468	29.63187421	0.068449629
13.11585264	×ÔÉí³µÁ¾	Road 1	160.1475613	70.55555878	-0.000344696	0.786580145	0.568627477	0	180.8887	983.4658	655.7905	0.4115	4.1037	731	2.764155762	0.0063852	29.67799996	0.06855618
13.13242831	×ÔÉí³µÁ¾	Road 1	160.4725776	70.58892288	-0.000350581	0.786818743	0.568627477	0	181.1631	983.4688	655.7905	0.4135	4.1016	732	2.07662061	0.004796994	29.71242133	0.068635693
13.14920888	×ÔÉí³µÁ¾	Road 1	160.8017672	70.62229385	-0.000355612	0.786285937	0.576470613	0	181.4377	983.4727	655.7905	0.4146	4.1006	733	2.062713203	0.004764867	29.74703484	0.06871565
13.16579555	×ÔÉí³µÁ¾	Road 1	161.127384	70.67246704	-0.000359301	0.790859163	0.576470613	0	181.8497	983.4785	655.7904	0.4172	4.0989	734	2.696482462	0.006228874	29.7917605	0.068818967
13.18248192	×ÔÉí³µÁ¾	Road 1	161.4551252	70.7085022	-0.000361155	0.793326437	0.576470613	0	182.1443	983.4824	655.7904	0.4187	4.0975	735	2.169239775	0.005010944	29.82795723	0.068902581
13.19922107	×ÔÉí³µÁ¾	Road 1	161.78406	70.74225769	-0.000361619	0.796066642	0.576470613	0	182.4193	983.4854	655.7904	0.4207	4.0954	736	2.082752629	0.004811159	29.86282075	0.068983116
13.21576558	×ÔÉí³µÁ¾	Road 1	162.1093256	70.77609558	-0.000361619	0.796086788	0.576470613	0	182.6944	983.4893	655.7903	0.4218	4.0943	737	2.10115761	0.004853674	29.89758338	0.069063418
13.23243325	×ÔÉí³µÁ¾	Road 1	162.4372701	70.83174133	-0.000361619	0.797341228	0.576470613	0	183.1468	983.4951	655.7903	0.4242	4.092	738	2.893720435	0.006684494	29.94581497	0.069174833
13.24917058	×ÔÉí³µÁ¾	Road 1	162.7667653	70.8705162	-0.000361619	0.798224211	0.58431375	0	183.4616	983.499	655.7903	0.426	4.0902	739	2.269698457	0.005243003	29.98380364	0.069262586
13.26576274	×ÔÉí³µÁ¾	Road 1	163.0935596	70.90451889	-0.000361619	0.80117029	0.58431375	0	183.7373	983.5029	655.7903	0.4271	4.0891	740	2.106910952	0.004866964	30.01876185	0.06934334
13.28245864	×ÔÉí³µÁ¾	Road 1	163.4225555	70.9387001	-0.000361619	0.804270625	0.58431375	0	184.0131	983.5068	655.7903	0.4282	4.088	741	2.106530268	0.004866085	30.05393227	0.069424584
13.29924215	×ÔÉí³µÁ¾	Road 1	163.7534607	70.97793503	-0.000361619	0.807155192	0.600000024	0	184.3284	983.5107	655.7902	0.43	4.0861	742	2.285579498	0.005279689	30.0922923	0.069513195
13.31577969	×ÔÉí³µÁ¾	Road 1	164.0797894	71.03733673	-0.000361619	0.817766309	0.600000024	0	184.8018	983.5176	655.7902	0.4318	4.0844	743	3.0566866	0.007060946	30.1428424	0.069629966
13.33245506	×ÔÉí³µÁ¾	Road 1	164.4090004	71.07245865	-0.000361619	0.825127006	0.615686297	0	185.0781	983.5205	655.7902	0.4339	4.0823	744	2.146116886	0.00495753	30.1786297	0.069712635
13.3491594	×ÔÉí³µÁ¾	Road 1	164.7389481	71.10799942	-0.000361619	0.83493793	0.631372571	0	185.3545	983.5244	655.7902	0.435	4.0812	745	2.160198038	0.004990057	30.21471436	0.06979599
13.36580178	×ÔÉí³µÁ¾	Road 1	165.0678392	71.14413757	-0.000361619	0.848179102	0.639215708	0	185.6311	983.5283	655.7902	0.4361	4.08	746	2.188069793	0.005054441	30.25112906	0.069880108
13.38247385	×ÔÉí³µÁ¾	Road 1	165.397587	71.20243378	-0.000361619	0.873004198	0.654901981	0	186.066	983.5342	655.7901	0.4382	4.078	747	3.004500975	0.006940397	30.30122032	0.069995819
13.39910744	×ÔÉí³µÁ¾	Road 1	165.72675	71.2406044	-0.000361619	0.890658617	0.670588255	0	186.343	983.5371	655.7901	0.4403	4.0759	748	2.266525919	0.005235675	30.33892077	0.070082907
13.41583376	×ÔÉí³µÁ¾	Road 1	166.0580354	71.3024437	-0.000361619	0.919758439	0.678431392	0	186.7785	983.543	655.79	0.4423	4.0738	749	3.131732199	0.007234301	30.39130314	0.07020391
13.43243472	×ÔÉí³µÁ¾	Road 1	166.3870249	71.34297638	-0.000361619	0.937107027	0.678431392	0	187.0558	983.5469	655.79	0.4434	4.0727	750	2.359808321	0.005451157	30.43047822	0.070294405
13.44915921	×ÔÉí³µÁ¾	Road 1	166.7186541	71.38425064	-0.000361619	0.949988186	0.686274529	0	187.3333	983.5508	655.7898	0.4446	4.0716	751	2.377216466	0.00549137	30.47023596	0.070386245
13.46580893	×ÔÉí³µÁ¾	Road 1	167.0489944	71.42614975	-0.000361619	0.962129295	0.686274529	0	187.611	983.5547	655.7896	0.4457	4.0704	752	2.408427407	0.005563467	30.51033558	0.070478875
13.48247587	×ÔÉí³µÁ¾	Road 1	167.3800005	71.49613266	-0.000361619	0.977680743	0.686274529	0	188.0675	983.5605	655.789	0.4482	4.068	753	3.449179768	0.007967605	30.56782286	0.070611671
13.49913364	×ÔÉí³µÁ¾	Road 1	167.7110242	71.5392746	-0.000361619	0.985191464	0.686274529	0	188.3456	983.5645	655.7886	0.4493	4.0669	754	2.457113701	0.005675933	30.60875292	0.070706219
13.51577236	×ÔÉí³µÁ¾	Road 1	168.0419714	71.60467758	-0.000361619	0.993652105	0.686274529	0	188.7631	983.5693	655.7877	0.452	4.0642	755	3.288198499	0.007595739	30.66346432	0.070832603
13.53248732	×ÔÉí³µÁ¾	Road 1	168.3746388	71.6485611	-0.000361619	0.997742355	0.686274529	0	189.0417	983.5732	655.787	0.4532	4.063	756	2.482379429	0.005734296	30.70495719	0.070928451
13.55057394	×ÔÉí³µÁ¾	Road 1	168.7349379	71.71473312	-0.000361619	1.003886223	0.678431392	0	189.4598	983.5791	655.7859	0.4549	4.0613	757	3.124189704	0.007216878	30.76146321	0.07105898
13.56577172	×ÔÉí³µÁ¾	Road 1	169.0378763	71.75903549	-0.000361619	1.004215837	0.678431392	0	189.7387	983.583	655.785	0.4561	4.0601	758	2.665309072	0.006156864	30.80197	0.071152551
13.58246139	×ÔÉí³µÁ¾	Road 1	169.3707725	71.8064827	-0.000361619	1.004355311	0.678431392	0	190.0378	983.5869	655.784	0.4576	4.0586	759	2.622078661	0.006057002	30.84573162	0.07125364
13.59907371	×ÔÉí³µÁ¾	Road 1	169.7023304	71.85077133	-0.000361619	1.005561233	0.678431392	0	190.3171	983.5908	655.783	0.4587	4.0574	760	2.513742063	0.005806744	30.88749072	0.071350104
13.61583852	×ÔÉí³µÁ¾	Road 1	170.0372566	71.92052765	-0.000361619	1.007510424	0.670588255	0	190.7564	983.5967	655.7813	0.4609	4.0553	761	3.444260035	0.007956241	30.94523309	0.071483488
13.63243216	×ÔÉí³µÁ¾	Road 1	170.3689674	71.96489868	-0.000361619	1.005859613	0.662745118	0	191.0361	983.6006	655.78	0.462	4.0541	762	2.522212845	0.005826312	30.98708576	0.071580168
13.64911229	×ÔÉí³µÁ¾	Road 1	170.7026124	72.00911179	-0.000361619	1.001762033	0.654901981	0	191.3161	983.6035	655.7787	0.4642	4.052	763	2.509062711	0.005795935	31.02893727	0.071676845
13.66580929	×ÔÉí³µÁ¾	Road 1	171.0369002	72.07499542	-0.000361619	0.99314642	0.647058845	0	191.7363	983.6094	655.7766	0.466	4.0502	764	3.317204758	0.007662743	31.08432464	0.07180479
13.6824755	×ÔÉí³µÁ¾	Road 1	171.3707728	72.11846008	-0.000361619	0.985494852	0.639215708	0	192.0167	983.6133	655.7751	0.4672	4.049	765	2.485826667	0.00574226	31.12575394	0.071900492
13.69913804	×ÔÉí³µÁ¾	Road 1	171.7048704	72.18294983	-0.000359301	0.975996315	0.639215708	0	192.4375	983.6191	655.7727	0.4689	4.0473	766	3.274676673	0.007564503	31.18031838	0.072026535
13.7157434	×ÔÉí³µÁ¾	Road 1	172.03792	72.20431137	-0.000356992	0.972855449	0.631372571	0	192.5779	983.6211	655.7719	0.4695	4.0467	767	1.664183625	0.003844264	31.20795275	0.072090371
13.7324327	×ÔÉí³µÁ¾	Road 1	172.3729485	72.26801147	-0.000355612	0.966299236	0.631372571	0	192.9992	983.627	655.7692	0.4713	4.0449	768	3.244786153	0.007495456	31.26210597	0.072215465
13.74912091	×ÔÉí³µÁ¾	Road 1	172.7082616	72.3341629	-0.000351948	0.961420476	0.631372571	0	193.4411	983.6328	655.7662	0.4735	4.0427	769	3.339379605	0.007713967	31.31783421	0.072344197
13.76575632	×ÔÉí³µÁ¾	Road 1	173.0427081	72.37613754	-0.000349217	0.959795296	0.631372571	0	193.7224	983.6367	655.7642	0.4747	4.0415	770	2.440666611	0.00563794	31.35843571	0.072437987
13.7824119	×ÔÉí³µÁ¾	Road 1	173.3777537	72.41803665	-0.0003465	0.958533943	0.631372571	0	194.004	983.6396	655.7621	0.4769	4.0393	771	2.437158816	0.005629837	31.399028	0.072531755
13.79909314	×ÔÉí³µÁ¾	Road 1	173.7135094	72.45989456	-0.000339769	0.9595052	0.631372571	0	194.2856	983.6436	655.7599	0.4781	4.0381	772	2.434426331	0.005623525	31.43963725	0.072625562
13.81577878	×ÔÉí³µÁ¾	Road 1	174.0496872	72.53183441	-0.000334007	0.961205006	0.631372571	0	194.7689	983.6504	655.756	0.48	4.0362	773	3.56531333	0.008235874	31.49912677	0.072762983
13.83241896	×ÔÉí³µÁ¾	Road 1	174.3851433	72.57384338	-0.00032657	0.96219337	0.623529434	0	195.0511	983.6543	655.7536	0.4812	4.035	774	2.447355611	0.005653391	31.53985121	0.072857056
13.84931243	×ÔÉí³µÁ¾	Road 1	174.7259027	72.61584549	-0.0003201	0.96256876	0.623529434	0	195.3334	983.6582	655.7512	0.4825	4.0337	775	2.424597087	0.005600819	31.58081108	0.072951674
13.86575394	×ÔÉí³µÁ¾	Road 1	175.057833	72.67879715	-0.000312872	0.960455656	0.623529434	0	195.7571	983.6641	655.7473	0.4843	4.0319	776	3.269078396	0.007551571	31.63455966	0.073075833
13.88244324	×ÔÉí³µÁ¾	Road 1	175.3949602	72.72070999	-0.000304924	0.961033404	0.623529434	0	196.0398	983.667	655.7446	0.4865	4.0297	777	2.44341626	0.005644292	31.67533857	0.073170032
13.89909662	×ÔÉí³µÁ¾	Road 1	175.7316528	72.78364105	-0.000295483	0.962544143	0.623529434	0	196.4642	983.6729	655.7405	0.4883	4.0279	778	3.241959616	0.007488927	31.72932816	0.073294748
13.91577016	×ÔÉí³µÁ¾	Road 1	176.0689479	72.82569809	-0.000288632	0.964494646	0.623529434	0	196.7473	983.6768	655.7375	0.4905	4.0266	779	2.453444754	0.005667457	31.77023576	0.073389245
13.93247229	×ÔÉí³µÁ¾	Road 1	176.4070167	72.86781693	-0.000281888	0.965865076	0.623529434	0	197.0306	983.6807	655.7346	0.4918	4.0254	780	2.454300799	0.005669435	31.81122782	0.073483936
13.94911174	×ÔÉí³µÁ¾	Road 1	176.7441237	72.93420181	-0.000275249	0.969153762	0.623529434	0	197.4761	983.6865	655.7297	0.494	4.0231	781	3.380754058	0.007809542	31.86748171	0.073613883
13.96574973	×ÔÉí³µÁ¾	Road 1	177.0813966	72.97655411	-0.000271393	0.971791089	0.639215708	0	197.7598	983.6904	655.7265	0.4953	4.0219	782	2.472490288	0.005711453	31.90861896	0.07370891
13.98247275	×ÔÉí³µÁ¾	Road 1	177.4205914	73.01915359	-0.000266814	0.978985906	0.654901981	0	198.0437	983.6943	655.7233	0.4965	4.0206	783	2.474914828	0.005717053	31.95000702	0.073804516
13.99911147	×ÔÉí³µÁ¾	Road 1	177.7583911	73.08730316	-0.000265299	1.003711939	0.670588255	0	198.4901	983.7002	655.7179	0.4987	4.0183	784	3.454261404	0.007979344	32.0074815	0.073937282
14.01575202	×ÔÉí³µÁ¾	Road 1	178.0963304	73.10944748	-0.000264921	1.01301074	0.686274529	0	198.6322	983.7021	655.7162	0.4994	4.0177	785	1.709279357	0.003948435	32.03592484	0.074002986
14.03376495	×ÔÉí³µÁ¾	Road 1	178.4624965	73.18063889	-0.000264921	1.044726253	0.701960802	0	199.0792	983.709	655.7106	0.5007	4.0165	786	3.367462067	0.007778837	32.09658272	0.074143106
14.05198573	×ÔÉí³µÁ¾	Road 1	178.8332614	73.25449448	-0.000264921	1.081887841	0.717647076	0	199.5267	983.7148	655.7048	0.5029	4.0143	787	3.434506298	0.00793371	32.15916208	0.074287664
14.08250739	×ÔÉí³µÁ¾	Road 1	179.4549818	73.33130951	-0.000264921	1.118609905	0.733333349	0	199.9746	983.7207	655.6988	0.5052	4.0121	788	2.464445034	0.005692868	32.23438105	0.07446142
14.09911678	×ÔÉí³µÁ¾	Road 1	179.7937301	73.42193298	-0.000264921	1.156933069	0.75686276	0	200.4841	983.7275	655.6917	0.5076	4.0098	789	4.33091287	0.010004409	32.30631488	0.074627587
14.11575953	×ÔÉí³µÁ¾	Road 1	180.1334354	73.48180847	-0.000264921	1.183597565	0.78039217	0	200.8106	983.7314	655.687	0.5096	4.0078	790	3.155229585	0.00728858	32.35882657	0.074748889
14.13243124	×ÔÉí³µÁ¾	Road 1	180.4739808	73.53555222	-0.000264921	1.213043332	0.796078444	0	201.0965	983.7354	655.6829	0.5108	4.0065	791	2.919799585	0.006744737	32.40750461	0.074861336
14.14913667	×ÔÉí³µÁ¾	Road 1	180.8156024	73.61905518	-0.000264921	1.243348002	0.80392158	0	201.5257	983.7412	655.6764	0.5125	4.0046	792	4.050938136	0.009357667	32.47517728	0.07501766
14.16587289	×ÔÉí³µÁ¾	Road 1	181.1581206	73.67646561	-0.000264921	1.282160282	0.811764717	0	201.8121	983.7451	655.672	0.5137	4.0033	793	3.056301792	0.007060057	32.52632822	0.075135818
14.1824097	×ÔÉí³µÁ¾	Road 1	181.4968267	73.7349884	-0.000264921	1.304424286	0.819607854	0	202.0988	983.749	655.6675	0.5148	4.002	794	3.127668589	0.007224914	32.57804989	0.075255295
14.19907628	×ÔÉí³µÁ¾	Road 1	181.8385061	73.80316544	-0.000264921	1.324477792	0.819607854	0	202.4266	983.7539	655.6622	0.5157	4.001	795	3.481853571	0.008043082	32.63608047	0.075389346
14.21572746	×ÔÉí³µÁ¾	Road 1	182.1801691	73.86784744	-0.000264921	1.336301208	0.827450991	0	202.7343	983.7578	655.6572	0.5174	3.9993	796	3.35318656	0.007745861	32.69191498	0.075518324
14.23247248	×ÔÉí³µÁ¾	Road 1	182.5241835	73.95941849	-0.000264921	1.351881146	0.827450991	0	203.1655	983.7637	655.65	0.5195	3.9973	797	4.368332695	0.010090849	32.76506279	0.075687295
14.24922006	×ÔÉí³µÁ¾	Road 1	182.8685379	74.02116852	-0.000264921	1.363555193	0.827450991	0	203.4532	983.7676	655.6451	0.5209	3.996	798	3.23333465	0.007469003	32.81921333	0.075812383
14.26586757	×ÔÉí³µÁ¾	Road 1	183.2113293	74.12813416	-0.000264921	1.379143715	0.827450991	0	203.9471	983.7744	655.6365	0.5233	3.9939	799	4.989730381	0.011526277	32.90227994	0.076004267
14.28244728	×ÔÉí³µÁ¾	Road 1	183.5530142	74.19105148	-0.000264921	1.386446118	0.827450991	0	204.2355	983.7783	655.6313	0.5247	3.9926	800	3.30909951	0.00764402	32.95714382	0.076131002
14.29907683	×ÔÉí³µÁ¾	Road 1	183.8960398	74.25889893	-0.000264921	1.39297843	0.819607854	0	204.5448	983.7822	655.6257	0.5264	3.9909	801	3.494643154	0.008072626	33.01525817	0.076265246
14.31575733	×ÔÉí³µÁ¾	Road 1	184.2404109	74.32245483	-0.000264921	1.396971226	0.819607854	0	204.8337	983.7861	655.6204	0.5278	3.9896	802	3.32427554	0.007679076	33.07070876	0.076393337
14.33240961	×ÔÉí³µÁ¾	Road 1	184.5846623	74.42253342	-0.000264921	1.400679588	0.811764717	0	205.2883	983.793	655.6118	0.5292	3.9882	803	4.741558352	0.010953	33.14966652	0.07657573
14.34912054	×ÔÉí³µÁ¾	Road 1	184.9304224	74.48637772	-0.000264921	1.401192307	0.811764717	0	205.5779	983.7969	655.6063	0.5305	3.9869	804	3.337584045	0.007709819	33.20544065	0.076704568
14.36980347	×ÔÉí³µÁ¾	Road 1	185.358994	74.59570541	-0.000264921	1.397935271	0.796078444	0	206.0748	983.8037	655.5965	0.5327	3.9847	805	4.285263197	0.009898958	33.29407245	0.076909307
14.40036509	×ÔÉí³µÁ¾	Road 1	185.9934561	74.73633728	-0.000264921	1.384122729	0.78039217	0	206.7179	983.8115	655.5835	0.5365	3.9809	806	3.850509716	0.008894677	33.41175026	0.077181143
14.41580114	×ÔÉí³µÁ¾	Road 1	186.3141777	74.79879456	-0.000264921	1.378886104	0.764705896	0	207.0087	983.8154	655.5775	0.5378	3.9795	807	3.496175616	0.008076166	33.46571739	0.077305807
14.4324098	×ÔÉí³µÁ¾	Road 1	186.6595509	74.86116943	-0.000264921	1.366675496	0.733333349	0	207.2997	983.8203	655.5714	0.5382	3.9791	808	3.310897199	0.007648173	33.52070695	0.077432833
14.449076	×ÔÉí³µÁ¾	Road 1	187.0064052	74.92259674	-0.000264921	1.342860103	0.725490212	0	207.591	983.8242	655.5652	0.5396	3.9778	809	3.268192957	0.007549526	33.57517534	0.077558655
14.46572132	×ÔÉí³µÁ¾	Road 1	187.3532586	75.01643372	-0.000264921	1.30279243	0.709803939	0	208.0492	983.8301	655.5553	0.542	3.9753	810	4.535872731	0.010477866	33.65067636	0.077733062
14.48449046	×ÔÉí³µÁ¾	Road 1	187.7446498	75.07047958	-0.000264921	1.283007145	0.701960802	0	208.3203	983.834	655.5493	0.543	3.9743	811	2.751309858	0.006355526	33.70231609	0.07785235
14.49941553	×ÔÉí³µÁ¾	Road 1	188.0562525	75.16010742	-0.000264921	1.255682945	0.701960802	0	208.7794	983.8398	655.5391	0.5455	3.9719	812	4.782813721	0.0110483	33.7736999	0.078017247
14.51576063	×ÔÉí³µÁ¾	Road 1	188.397757	75.21616516	-0.000264921	1.245171189	0.694117665	0	209.0718	983.8438	655.5323	0.5469	3.9705	813	3.113502095	0.00719219	33.82459042	0.078134804
14.53259802	×ÔÉí³µÁ¾	Road 1	188.749807	75.27175598	-0.000264921	1.237318516	0.694117665	0	209.3645	983.8477	655.5256	0.5483	3.9691	814	3.032352718	0.007004735	33.87564733	0.078252745
14.54905823	×ÔÉí³µÁ¾	Road 1	189.0942411	75.33095856	-0.000264921	1.229497194	0.694117665	0	209.6783	983.8525	655.5182	0.5491	3.9683	815	3.226475201	0.007453158	33.92875577	0.078375426
14.5657391	×ÔÉí³µÁ¾	Road 1	189.4436921	75.41713257	-0.000264921	1.224679947	0.694117665	0	210.139	983.8584	655.5073	0.5516	3.9658	816	4.25163481	0.009821276	33.99967674	0.078539253
14.58238331	×ÔÉí³µÁ¾	Road 1	189.792628	75.47182388	-0.000264921	1.221358299	0.686274529	0	210.4324	983.8623	655.5002	0.553	3.9643	817	3.029378233	0.006997864	34.05009836	0.078655727
14.6516276	×ÔÉí³µÁ¾	Road 1	191.2494727	75.74113312	-0.000264921	1.20455265	0.678431392	0	211.9029	983.8828	655.4634	0.5591	3.9581	818	3.430300435	0.007923994	34.28762708	0.079204419
14.66737119	×ÔÉí³µÁ¾	Road 1	191.5809402	75.79485626	-0.000264921	1.204742551	0.670588255	0	212.1976	983.8867	655.4557	0.5605	3.9567	819	3.123893107	0.007216193	34.33680836	0.079318027
14.682595	×ÔÉí³µÁ¾	Road 1	191.9016908	75.84844208	-0.000264921	1.198671103	0.568627477	0	212.4925	983.8906	655.4479	0.5619	3.9552	820	3.19632227	0.007383504	34.38546856	0.079430432
14.69903431	×ÔÉí³µÁ¾	Road 1	192.2484239	75.93013916	-0.000264921	1.136365771	0.529411793	0	212.9564	983.8965	655.4355	0.5645	3.9527	821	4.149808722	0.009586058	34.45368855	0.079588021
14.71579069	×ÔÉí³µÁ¾	Road 1	192.602115	75.98823624	-0.000264921	1.653960705	0.498039216	0	213.2519	983.9004	655.4276	0.5659	3.9512	822	3.166994038	0.007315756	34.50675591	0.079710606
14.73262625	×ÔÉí³µÁ¾	Road 1	192.9583111	76.16653061	-0.000264921	2.760007143	0.466666669	0	213.6958	983.9072	655.4154	0.5672	3.95	823	7.855123037	0.018145334	34.63900129	0.080016093
14.74910734	×ÔÉí³µÁ¾	Road 1	193.3076741	76.31209259	-0.000264921	2.86380744	0.419607848	0	213.9923	983.9111	655.4072	0.5686	3.9485	824	6.712611608	0.015506133	34.7496325	0.080271651
14.76577392	×ÔÉí³µÁ¾	Road 1	193.6615314	76.43359451	-0.000264921	1.922280312	0.380392164	0	214.3107	983.915	655.3982	0.5705	3.9466	825	5.706075249	0.013181034	34.84473323	0.080491334
14.78246065	×ÔÉí³µÁ¾	Road 1	194.0161319	76.50158615	-0.000264921	1.208220363	0.356862754	0	214.6082	983.9189	655.3897	0.572	3.9451	826	3.587629105	0.008287423	34.90459905	0.080629624
14.79904512	×ÔÉí³µÁ¾	Road 1	194.3689316	76.58243866	-0.000264921	1.399539351	0.325490206	0	215.0548	983.9258	655.3769	0.5733	3.9438	827	4.120456836	0.009518255	34.97293462	0.080787479
14.81577108	×ÔÉí³µÁ¾	Road 1	194.7251022	76.66012573	-0.000266814	1.681254387	0.301960796	0	215.3741	983.9297	655.3675	0.5752	3.9419	828	3.971777173	0.009174805	35.0393664	0.080940936
14.83242006	×ÔÉí³µÁ¾	Road 1	195.0800043	76.74029846	-0.000267954	1.546432614	0.278431386	0	215.6725	983.9336	655.3587	0.5767	3.9404	829	4.088764126	0.009445045	35.10744015	0.081098187
14.84911083	×ÔÉí³µÁ¾	Road 1	195.4361673	76.820121	-0.000274862	1.009002447	0.262745112	0	216.1206	983.9395	655.3453	0.579	3.9381	830	4.07079286	0.009403532	35.17538481	0.081255139
14.86578693	×ÔÉí³µÁ¾	Road 1	195.7922101	76.86171799	-0.000281101	0.876838326	0.239215687	0	216.4408	983.9443	655.3356	0.5799	3.9372	831	2.554242238	0.0059003	35.21797962	0.081353533
14.88249126	×ÔÉí³µÁ¾	Road 1	196.1490504	76.90371323	-0.000289833	0.990530968	0.223529413	0	216.7399	983.9482	655.3265	0.5814	3.9357	832	2.568510166	0.005933258	35.26088487	0.081452644
14.8990552	×ÔÉí³µÁ¾	Road 1	196.5032171	76.97445831	-0.000299974	1.155122638	0.20784314	0	217.1889	983.9541	655.3126	0.5837	3.9334	833	3.738522535	0.008635987	35.32280953	0.08159569
14.91581268	×ÔÉí³µÁ¾	Road 1	196.8617505	77.023526	-0.000312872	1.041212201	0.184313729	0	217.4884	983.958	655.3032	0.5853	3.9319	834	2.847502383	0.006577731	35.37052649	0.081705916
14.93247119	×ÔÉí³µÁ¾	Road 1	197.2184233	77.07903442	-0.000327004	0.754448771	0.160784319	0	217.9381	983.9648	655.2889	0.5866	3.9305	835	3.118290503	0.007203251	35.42247257	0.081825912
14.94903513	×ÔÉí³µÁ¾	Road 1	197.5732069	77.10852585	-0.000348763	0.730510175	0.137254909	0	218.238	983.9688	655.2792	0.5881	3.929	836	2.085950905	0.004818547	35.45702413	0.081905726
14.96573946	×ÔÉí³µÁ¾	Road 1	197.931143	77.13987122	-0.000368635	0.797501385	0.121568628	0	218.5381	983.9727	655.2695	0.5897	3.9274	837	2.150661891	0.004968029	35.4929495	0.081988713
14.98247348	×ÔÉí³µÁ¾	Road 1	198.2899486	77.19005814	-0.000391693	0.782638371	0.098039217	0	218.9884	983.9785	655.2547	0.592	3.9251	838	2.900336786	0.006699778	35.5414838	0.082100828
14.99911477	×ÔÉí³µÁ¾	Road 1	198.6469019	77.21952209	-0.000420814	0.675484478	0.074509807	0	219.2888	983.9834	655.2448	0.5926	3.9245	839	2.081899994	0.004809189	35.57612928	0.082180859
15.01580224	×ÔÉí³µÁ¾	Road 1	199.0050077	77.25444489	-0.000448119	0.568294704	0.05882353	0	219.7395	983.9893	655.2296	0.5949	3.9222	840	2.297740507	0.005307781	35.61447276	0.082269432
15.03245415	×ÔÉí³µÁ¾	Road 1	199.362449	77.2757309	-0.000481625	0.569797695	0.043137256	0	220.0401	983.9932	655.2194	0.5965	3.9207	841	1.754578563	0.004053076	35.64368985	0.082336924
15.04906097	×ÔÉí³µÁ¾	Road 1	199.7190303	77.29908371	-0.000513819	0.574370265	0.035294119	0	220.3623	983.998	655.2084	0.5974	3.9197	842	1.840450229	0.00425144	35.67425388	0.082407526
15.06577117	×ÔÉí³µÁ¾	Road 1	200.0779276	77.31987534	-0.000546192	0.540441036	0.027450981	0	220.6631	984.002	655.1979	0.599	3.9181	843	1.732667086	0.004002461	35.70320709	0.082474408
15.08239193	×ÔÉí³µÁ¾	Road 1	200.4350323	77.34769135	-0.000578624	0.460241646	0.019607844	0	221.1359	984.0088	655.1814	0.6008	3.9164	844	2.020068316	0.004666358	35.73678215	0.082551967
15.09908049	×ÔÉí³µÁ¾	Road 1	200.7936642	77.36281815	-0.000616286	0.430868894	0.019607844	0	221.4369	984.0127	655.1708	0.6023	3.9148	845	1.507652505	0.003482677	35.76194271	0.082610088
15.11582625	×ÔÉí³µÁ¾	Road 1	201.1535889	77.37657852	-0.000650035	0.412251264	0.011764706	0	221.7379	984.0166	655.16	0.6039	3.9132	846	1.451244319	0.003352374	35.78624489	0.082666226
15.13243894	×ÔÉí³µÁ¾	Road 1	201.5107451	77.39638824	-0.000688558	0.377763271	0	0	222.2111	984.0234	655.1429	0.6056	3.9115	847	1.699445921	0.00392572	35.81447726	0.082731442
15.14910588	×ÔÉí³µÁ¾	Road 1	201.8691188	77.4074501	-0.000718245	0.35397765	0	0	222.5122	984.0273	655.1319	0.6072	3.9099	848	1.34601091	0.003109285	35.83691114	0.082783265
15.16581497	×ÔÉí³µÁ¾	Road 1	202.2284481	77.41804504	-0.000748773	0.335737377	0	0	222.835	984.0313	655.12	0.6092	3.908	849	1.326340747	0.003063847	35.8590731	0.082834459
15.18238111	×ÔÉí³µÁ¾	Road 1	202.5847583	77.43004074	-0.00078093	0.232852712	0	0.011764706	223.3084	984.0381	655.1024	0.6109	3.9062	850	1.386732849	0.003203353	35.88204591	0.082887526
15.19904769	×ÔÉí³µÁ¾	Road 1	202.9432377	77.43197021	-0.000806039	0.183710292	0	0.011764706	223.6312	984.043	655.0902	0.6119	3.9062	851	0.979716321	0.002263145	35.89837442	0.082925245
15.21573076	×ÔÉí³µÁ¾	Road 1	203.3020706	77.43169556	-0.000827639	0.153419793	0	0.011764706	223.954	984.0469	655.078	0.6138	3.9042	852	0.902246521	0.002084189	35.91342666	0.082960016
15.23252159	×ÔÉí³µÁ¾	Road 1	203.6632285	77.43320618	-0.0008488	0.19982177	0	0.011764706	224.2553	984.0518	655.0664	0.6144	3.9036	853	0.962461381	0.002223286	35.9295872	0.082997346
15.24914528	×ÔÉí³µÁ¾	Road 1	204.0208129	77.43792343	-0.000868651	0.212591603	0	0.011764706	224.7073	984.0576	655.049	0.6167	3.9013	854	1.092190792	0.002522961	35.94774344	0.083039287
15.2657906	×ÔÉí³µÁ¾	Road 1	204.3788698	77.43950272	-0.000883741	0.159795746	0	0.011764706	225.0086	984.0615	655.0372	0.6182	3.8997	855	0.965802247	0.002231003	35.96381952	0.083076423
15.28242785	×ÔÉí³µÁ¾	Road 1	204.7367527	77.43939285	-0.000896448	0.136445329	0	0.011764706	225.31	984.0654	655.0253	0.6197	3.8982	856	0.902306389	0.002084328	35.97883142	0.083111101
15.29910762	×ÔÉí³µÁ¾	Road 1	205.0955497	77.43924866	-0.000907559	0.161102489	0	0.011764706	225.805	984.0732	655.0057	0.6209	3.897	857	0.902305267	0.002084325	35.99388166	0.083145867
15.31576136	×ÔÉí³µÁ¾	Road 1	205.453792	77.44038162	-0.000914442	0.171853378	0	0.011764706	226.1064	984.0771	654.9935	0.6234	3.8954	858	0.947842431	0.002189516	36.00966679	0.08318233
15.33238908	×ÔÉí³µÁ¾	Road 1	205.8114788	77.44131546	-0.000918762	0.161438823	0	0.011764706	226.4077	984.0811	654.9814	0.6249	3.8938	859	0.939906979	0.002171185	36.0252953	0.083218432
15.3490333	×ÔÉí³µÁ¾	Road 1	206.1695196	77.44113007	-0.00092136	0.142764494	0	0.011764706	226.7091	984.085	654.969	0.6265	3.8923	860	0.902319901	0.002084359	36.0403137	0.083253125
15.36578235	×ÔÉí³µÁ¾	Road 1	206.5298134	77.44067688	-0.000923963	0.138450101	0	0.011764706	227.1611	984.0918	654.9504	0.6278	3.8909	861	0.902316376	0.002084351	36.05542665	0.083288036
15.38242143	×ÔÉí³µÁ¾	Road 1	206.8877404	77.44040222	-0.000923963	0.148651168	0	0.011764706	227.4625	984.0957	654.9379	0.6293	3.8893	862	0.90231424	0.002084346	36.07044033	0.083322717
15.39904952	×ÔÉí³µÁ¾	Road 1	207.245433	77.44085541	-0.000923963	0.152446076	0	0.011764706	227.9361	984.1025	654.918	0.6311	3.8876	863	0.920557399	0.002126488	36.08574744	0.083358077
15.41572416	×ÔÉí³µÁ¾	Road 1	207.6041269	77.44084167	-0.000923963	0.147558257	0	0.011764706	228.2375	984.1064	654.9053	0.6326	3.886	864	0.902317657	0.002084354	36.10079326	0.083392832
15.43243985	×ÔÉí³µÁ¾	Road 1	207.963703	77.44062881	-0.000926571	0.144359514	0	0.011764706	228.5389	984.1113	654.8925	0.6332	3.8854	865	0.902316002	0.00208435	36.1158761	0.083427674
15.44904081	×ÔÉí³µÁ¾	Road 1	208.3208103	77.44047089	-0.000926571	0.151080459	0	0.011764706	228.991	984.1172	654.873	0.6355	3.883	866	0.902314774	0.002084347	36.13085539	0.083462276
15.46569823	×ÔÉí³µÁ¾	Road 1	208.6791333	77.44077301	-0.000928312	0.1554555	0	0.011764706	229.2924	984.1221	654.8599	0.636	3.8825	867	0.914455472	0.002112392	36.14608785	0.083497463
15.51576796	×ÔÉí³µÁ¾	Road 1	209.7562148	77.44185791	-0.000928312	0.158078119	0	0.011764706	230.3042	984.1357	654.8153	0.6406	3.8777	868	0.916826633	0.00211787	36.19199312	0.083603504
15.53240191	×ÔÉí³µÁ¾	Road 1	210.1140427	77.44283981	-0.000930056	0.164971769	0	0.011764706	230.8209	984.1436	654.7921	0.6422	3.8762	869	0.94183935	0.002175649	36.20765963	0.083639694
15.54908572	×ÔÉí³µÁ¾	Road 1	210.4729476	77.44383545	-0.000939685	0.167757064	0	0.011764706	231.1654	984.1484	654.7765	0.6435	3.8748	870	0.942280441	0.002176668	36.22338045	0.083676009
15.56568558	×ÔÉí³µÁ¾	Road 1	210.8300509	77.44472122	-0.000944965	0.169553801	0	0.011764706	231.4669	984.1523	654.7627	0.645	3.8732	871	0.938060326	0.002166919	36.23895212	0.083711979
15.61571133	×ÔÉí³µÁ¾	Road 1	211.9062682	77.44776306	-0.000947612	0.177509069	0	0.011764706	232.3497	984.165	654.7219	0.6493	3.8699	872	0.943067897	0.002178487	36.2861298	0.08382096
15.63243839	×ÔÉí³µÁ¾	Road 1	212.2661357	77.45073624	-0.000954696	0.181860954	0	0.011764706	232.9526	984.1738	654.6935	0.6514	3.8677	873	1.021362895	0.002359348	36.3032142	0.083860425
15.64903568	×ÔÉí³µÁ¾	Road 1	212.6232188	77.45232925	-0.000966282	0.184536263	0	0.011764706	233.2541	984.1777	654.6793	0.6529	3.8661	874	0.966650073	0.002232962	36.31925797	0.083897486
15.66569016	×ÔÉí³µÁ¾	Road 1	212.9815424	77.45453339	-0.000966282	0.188040987	0	0.011764706	233.5556	984.1826	654.6649	0.6535	3.8655	875	0.991009162	0.002289231	36.33576271	0.083935612
15.682378	×ÔÉí³µÁ¾	Road 1	213.3405949	77.45695724	-0.000968969	0.192542881	0	0.011764706	234.0079	984.1885	654.6431	0.6559	3.8632	876	0.999667103	0.002309231	36.35244499	0.083974148
15.69905997	×ÔÉí³µÁ¾	Road 1	213.6995313	77.45913391	-0.000968969	0.194538906	0	0.011764706	234.3094	984.1934	654.6285	0.6565	3.8626	877	0.989802116	0.002286443	36.36895684	0.08401229
15.71568952	×ÔÉí³µÁ¾	Road 1	214.0573568	77.46281433	-0.000968969	0.198854208	0	0.011764706	234.7833	984.2002	654.6052	0.6582	3.8608	878	1.050642349	0.002426984	36.38642856	0.08405265
15.73242757	×ÔÉí³µÁ¾	Road 1	214.417528	77.46517639	-0.000968969	0.20256424	0	0.011764706	235.0848	984.2041	654.5904	0.6598	3.8592	879	0.996978031	0.002303019	36.40311603	0.084091198
15.74914363	×ÔÉí³µÁ¾	Road 1	214.7772378	77.46774445	-0.000968969	0.204809412	0	0.011764706	235.3864	984.209	654.5754	0.6604	3.8587	880	1.005375172	0.002322417	36.41992194	0.08413002
15.76569328	×ÔÉí³µÁ¾	Road 1	215.1333856	77.47187119	-0.000968969	0.207853407	0	0.011764706	235.8388	984.2148	654.5527	0.6628	3.8563	881	1.069500343	0.002470546	36.43762179	0.084170906
15.78235765	×ÔÉí³µÁ¾	Road 1	215.4920173	77.47511215	-0.000968969	0.211938411	0	0.011764706	236.162	984.2197	654.5365	0.6637	3.8553	882	1.032796408	0.00238576	36.4548327	0.084210664
15.79907994	×ÔÉí³µÁ¾	Road 1	215.8519096	77.47815399	-0.000968969	0.215468079	0	0.011764706	236.4636	984.2246	654.5212	0.6643	3.8547	883	1.024401411	0.002366367	36.47196304	0.084250235
15.81571133	×ÔÉí³µÁ¾	Road 1	216.2098612	77.48155289	-0.000968969	0.218501776	0	0.011764706	236.7653	984.2285	654.5057	0.6659	3.8531	884	1.0394737	0.002401184	36.48925092	0.08429017
15.83234455	×ÔÉí³µÁ¾	Road 1	216.5678776	77.48704605	-0.000968969	0.22185871	0	0.011764706	237.1316	984.2334	654.4871	0.6687	3.8514	885	1.123819931	0.002596024	36.50794367	0.08433335
15.8490771	×ÔÉí³µÁ¾	Road 1	216.9280522	77.49136505	-0.000968969	0.225152344	0	0.011764706	237.5841	984.2402	654.464	0.6701	3.85	886	1.075562929	0.00248455	36.52594058	0.084374923
15.86575358	×ÔÉí³µÁ¾	Road 1	217.2870379	77.49533386	-0.000968969	0.226878375	0	0.011764706	237.8858	984.2451	654.4485	0.6706	3.8494	887	1.062121439	0.002453501	36.54365302	0.084415838
15.88241355	×ÔÉí³µÁ¾	Road 1	217.6456903	77.50001678	-0.000968969	0.228481665	0	0.011764706	238.2091	984.25	654.432	0.6716	3.8484	888	1.091031927	0.002520284	36.56182959	0.084457826
15.89909736	×ÔÉí³µÁ¾	Road 1	218.0048882	77.50706177	-0.000968969	0.229679719	0	0.011764706	238.6618	984.2559	654.4089	0.674	3.846	889	1.185658775	0.002738872	36.58161088	0.084503521
15.91569319	×ÔÉí³µÁ¾	Road 1	218.3622143	77.51186829	-0.000968969	0.230332494	0	0.011764706	238.9635	984.2607	654.3934	0.6746	3.8454	890	1.096869052	0.002533768	36.59981434	0.084545571
15.93244627	×ÔÉí³µÁ¾	Road 1	218.7229624	77.51965485	-0.000968969	0.230778858	0	0.011764706	239.4378	984.2676	654.3692	0.6764	3.8436	891	1.214284295	0.002804997	36.62015734	0.084592563
15.94902963	×ÔÉí³µÁ¾	Road 1	219.0800798	77.52482529	-0.000968969	0.230519995	0	0.011764706	239.7397	984.2725	654.3538	0.677	3.8431	892	1.111849579	0.002568373	36.63859555	0.084635156
15.96575999	×ÔÉí³µÁ¾	Road 1	219.4403956	77.5319458	-0.000968969	0.229641303	0	0.011764706	240.0415	984.2764	654.3384	0.6786	3.8415	893	1.188180544	0.002744697	36.65847423	0.084681075
15.98244196	×ÔÉí³µÁ¾	Road 1	219.7996946	77.53738403	-0.000968969	0.230704978	0	0.011764706	240.4943	984.2832	654.3152	0.6799	3.8401	894	1.121502098	0.00259067	36.6771831	0.084724293
15.99907188	×ÔÉí³µÁ¾	Road 1	220.1578929	77.54179916	-0.000968969	0.22914359	0	0.011764706	240.7531	984.2871	654.302	0.6807	3.8394	895	1.081008615	0.00249713	36.69516019	0.08476582
16.01579637	×ÔÉí³µÁ¾	Road 1	220.5181665	77.55004578	-0.000968969	0.229124412	0	0.011764706	241.2491	984.2939	654.2767	0.6829	3.8372	896	1.233608589	0.002849636	36.71579166	0.084813479
16.03242996	×ÔÉí³µÁ¾	Road 1	220.8765045	77.55494156	-0.000968969	0.228885233	0	0.011764706	241.5511	984.2988	654.2612	0.6835	3.8367	897	1.100467831	0.002542081	36.73409639	0.084855763
16.04898913	×ÔÉí³µÁ¾	Road 1	221.2332611	77.55964508	-0.000968969	0.204205737	0	0.019607844	241.8531	984.3027	654.2458	0.6851	3.8351	898	1.093621169	0.002526265	36.75220585	0.084897596
16.06571472	×ÔÉí³µÁ¾	Road 1	221.5936117	77.56151276	-0.000968969	0.116786711	0	0.019607844	242.306	984.3096	654.2227	0.6865	3.8337	899	0.978103157	0.002259418	36.7685652	0.084935386
16.08234501	×ÔÉí³µÁ¾	Road 1	221.9519034	77.56032486	-0.000968969	0.09691707	0	0.027450981	242.608	984.3145	654.2072	0.6881	3.8332	900	0.903246971	0.002086501	36.78358646	0.084970085
16.09914061	×ÔÉí³µÁ¾	Road 1	222.3137459	77.5579628	-0.000968969	0.075843334	0	0.027450981	242.91	984.3193	654.1918	0.6887	3.8326	901	0.9032286	0.002086458	36.79875673	0.085005128
16.11568952	×ÔÉí³µÁ¾	Road 1	222.6702537	77.55363007	-0.000968969	0.080198936	0	0.027450981	243.3845	984.3262	654.1676	0.6905	3.8308	902	0.903194901	0.00208638	36.81370362	0.085039655
16.13253534	×ÔÉí³µÁ¾	Road 1	223.0331458	77.55108261	-0.000968969	0.071239986	0	0.035294119	243.6865	984.3301	654.1521	0.692	3.8293	903	0.903175087	0.002086334	36.82891834	0.085074801
16.14902817	×ÔÉí³µÁ¾	Road 1	223.3884111	77.54614563	-0.000968969	-0.015134932	0	0.043137256	243.9884	984.335	654.1367	0.6926	3.8287	904	0.903136688	0.002086246	36.84381362	0.085109209
16.1657281	×ÔÉí³µÁ¾	Road 1	223.7480522	77.52774353	-0.000968969	-0.171444565	0	0.050980393	244.4628	984.3418	654.1124	0.6944	3.8269	905	0.902993561	0.002085915	36.85889355	0.085144044
16.18239577	×ÔÉí³µÁ¾	Road 1	224.1069249	77.51180649	-0.000968969	-0.185143486	0	0.050980393	244.7646	984.3467	654.097	0.6949	3.8264	906	0.902869606	0.002085629	36.87394229	0.085178807
16.19902423	×ÔÉí³µÁ¾	Road 1	224.4648847	77.49699554	-0.000968969	-0.151427954	0	0.05882353	245.0664	984.3516	654.0817	0.6955	3.8258	907	0.90275441	0.002085363	36.8889537	0.085213483
16.21578024	×ÔÉí³µÁ¾	Road 1	224.8254817	77.47363586	-0.000968969	-0.192996964	0	0.05882353	245.5405	984.3584	654.0574	0.6973	3.824	908	0.902572723	0.002084943	36.90407722	0.085248418
16.23447424	×ÔÉí³µÁ¾	Road 1	225.2276954	77.4563736	-0.000968969	-0.220642999	0	0.05882353	245.8421	984.3633	654.042	0.6978	3.8235	909	0.902438461	0.002084633	36.9209474	0.085287388
16.25078929	×ÔÉí³µÁ¾	Road 1	225.5786071	77.43050079	-0.000968969	-0.196387872	0	0.05882353	246.2944	984.3701	654.0189	0.6992	3.8221	910	0.902237228	0.002084168	36.93566745	0.085321392
16.2656733	×ÔÉí³µÁ¾	Road 1	225.8986762	77.41518173	-0.000968969	-0.151345536	0	0.050980393	246.5958	984.374	654.0035	0.7007	3.8206	911	0.90211808	0.002083893	36.94909458	0.085352408
16.28238276	×ÔÉí³µÁ¾	Road 1	226.2579425	77.40277405	-0.00097256	-0.090163432	0	0.050980393	246.8972	984.3789	653.9881	0.7013	3.821	912	0.902021576	0.00208367	36.96416688	0.085387225
16.29901341	×ÔÉí³µÁ¾	Road 1	226.6154648	77.39205551	-0.00097256	-0.079826973	0	0.050980393	247.1986	984.3838	653.9727	0.7019	3.8204	913	0.90193821	0.002083477	36.9791667	0.085421875
16.31568036	×ÔÉí³µÁ¾	Road 1	226.9737059	77.37880325	-0.00097256	-0.125695348	0	0.050980393	247.5429	984.3887	653.9551	0.7032	3.8191	914	0.901835136	0.002083239	36.99419753	0.085456596
16.33239825	×ÔÉí³µÁ¾	Road 1	227.3329312	77.35490112	-0.00097256	-0.14724417	0	0.050980393	248.0593	984.3965	653.9287	0.7058	3.8177	915	0.901649231	0.00208281	37.00927121	0.085491416
16.34906739	×ÔÉí³µÁ¾	Road 1	227.6910476	77.34165573	-0.00097256	-0.119625524	0	0.050980393	248.3605	984.4014	653.9133	0.7063	3.8173	916	0.901546211	0.002082572	37.02429921	0.085526131
16.36566542	×ÔÉí³µÁ¾	Road 1	228.0475662	77.32548523	-0.00097256	-0.127919704	0	0.05882353	248.6616	984.4053	653.8979	0.7079	3.8158	917	0.901428131	0.002082299	37.03926114	0.085560693
16.38235802	×ÔÉí³µÁ¾	Road 1	228.4060188	77.30547638	-0.00097256	-0.234551877	0	0.05882353	249.1131	984.4121	653.8749	0.7092	3.8143	918	0.901264816	0.002081922	37.05430559	0.085595446
16.39899967	×ÔÉí³µÁ¾	Road 1	228.7632901	77.28660049	-0.00097256	-0.241472632	0	0.05882353	249.4141	984.417	653.8595	0.7098	3.8136	919	0.901118004	0.002081583	37.06930168	0.085630087
16.41570876	×ÔÉí³µÁ¾	Road 1	229.121885	77.25981445	-0.00097256	-0.227672353	0	0.06666667	249.8654	984.4238	653.8364	0.7111	3.8121	920	0.900909668	0.002081101	37.08435507	0.08566486
16.43230826	×ÔÉí³µÁ¾	Road 1	229.4780378	77.24032059	-0.00097256	-0.294433624	0	0.074509807	250.1661	984.4287	653.821	0.7117	3.8114	921	0.900758049	0.002080751	37.0993072	0.0856994
16.44900196	×ÔÉí³µÁ¾	Road 1	229.8361009	77.21637039	-0.00097256	-0.383618534	0	0.074509807	250.4668	984.4336	653.8057	0.7122	3.8107	922	0.90057177	0.002080321	37.11434107	0.085734128
16.46573195	×ÔÉí³µÁ¾	Road 1	230.1947354	77.17186203	-0.00097256	-0.486833543	0	0.090196081	250.9391	984.4404	653.7816	0.714	3.809	923	0.900225594	0.002079521	37.12940184	0.085768918
16.48242198	×ÔÉí³µÁ¾	Road 1	230.5523618	77.13913651	-0.00097256	-0.550975621	0	0.098039217	251.2395	984.4453	653.7662	0.7145	3.8085	924	0.899971062	0.002078933	37.14442238	0.085803616
16.49902881	×ÔÉí³µÁ¾	Road 1	230.9080391	77.10313568	-0.00097256	-0.611701608	0	0.105882354	251.5398	984.4492	653.7509	0.7161	3.8069	925	0.899691055	0.002078286	37.1593634	0.085838129
16.51572141	×ÔÉí³µÁ¾	Road 1	231.2652686	77.04168777	-0.00097256	-0.768553257	0	0.121568628	251.9899	984.457	653.7279	0.7166	3.8066	926	0.899213127	0.002077182	37.1743736	0.085872803
16.53242098	×ÔÉí³µÁ¾	Road 1	231.6224223	76.99322433	-0.00097256	-0.889676273	0	0.137254909	252.2898	984.4609	653.7126	0.7183	3.8051	927	0.898836189	0.002076312	37.18938378	0.085907477
16.54925323	×ÔÉí³µÁ¾	Road 1	231.9820172	76.90838242	-0.00097256	-1.08821702	0	0.152941182	252.7392	984.4678	653.6896	0.7196	3.8038	928	0.898176308	0.002074787	37.20450211	0.0859424
16.56565955	×ÔÉí³µÁ¾	Road 1	232.332201	76.83999939	-0.00097256	-1.134780884	0	0.160784319	253.0598	984.4736	653.6732	0.7205	3.8039	929	0.89764444	0.002073559	37.21922915	0.085976419
16.5824218	×ÔÉí³µÁ¾	Road 1	232.6896529	76.7693573	-0.00097256	-1.186738014	0	0.168627456	253.3802	984.4785	653.6569	0.7214	3.803	930	0.897095001	0.002072289	37.23426648	0.086011156
16.59904256	×ÔÉí³µÁ¾	Road 1	233.0437813	76.70302048	-0.00097256	-1.184227109	0	0.168627456	253.679	984.4824	653.6416	0.7228	3.8015	931	0.896579048	0.002071098	37.2491683	0.086045579
16.61572013	×ÔÉí³µÁ¾	Road 1	233.398816	76.63736343	-0.00097256	-1.167820334	0	0.168627456	253.9775	984.4873	653.6263	0.7233	3.801	932	0.896068382	0.002069918	37.26411255	0.0860801
16.63241859	×ÔÉí³µÁ¾	Road 1	233.7537619	76.52230911	-0.00097256	-1.113305449	0	0.160784319	254.5099	984.4961	653.5991	0.7241	3.8001	933	0.895173515	0.002067851	37.27906057	0.08611463
16.64905108	×ÔÉí³µÁ¾	Road 1	234.1070247	76.46157532	-0.00097256	-1.039463878	0	0.152941182	254.8077	984.5	653.5839	0.7256	3.7987	934	0.894701141	0.00206676	37.29394167	0.086149005
16.66571949	×ÔÉí³µÁ¾	Road 1	234.4607884	76.40498199	-0.00097256	-0.95304352	0	0.145098045	255.1053	984.5049	653.5687	0.7262	3.7982	935	0.894260971	0.002065743	37.30884758	0.086183438
16.6823659	×ÔÉí³µÁ¾	Road 1	234.8137281	76.32770691	-0.00097256	-0.719408512	0	0.121568628	255.5725	984.5127	653.5449	0.7268	3.7975	936	0.893659943	0.002064354	37.32372382	0.086217802
16.69900608	×ÔÉí³µÁ¾	Road 1	235.1663574	76.28915863	-0.00097256	-0.569972515	0	0.105882354	255.8696	984.5166	653.5297	0.7283	3.7961	937	0.893360123	0.002063662	37.33858949	0.086252142
16.71576906	×ÔÉí³µÁ¾	Road 1	235.5214388	76.25692749	-0.00097256	-0.457457066	0	0.090196081	256.1666	984.5215	653.5145	0.7288	3.7956	938	0.893109436	0.002063083	37.35356067	0.086286725
16.73236416	×ÔÉí³µÁ¾	Road 1	235.8728387	76.22970886	-0.00097256	-0.277083069	0	0.05882353	256.4846	984.5264	653.4983	0.7297	3.7947	939	0.892897736	0.002062594	37.36837839	0.086320954
16.74900288	×ÔÉí³µÁ¾	Road 1	236.2250873	76.21350403	-0.00097256	-0.020629765	0	0.035294119	256.8026	984.5313	653.4821	0.7306	3.7939	940	0.892771698	0.002062303	37.38323297	0.086355268
16.76730063	×ÔÉí³µÁ¾	Road 1	236.6124671	76.21523438	-0.00097256	0.22209999	0	0.027450981	257.2265	984.5381	653.4604	0.7315	3.7931	941	0.955070421	0.002206213	37.40070861	0.086395637
16.78344229	×ÔÉí³µÁ¾	Road 1	236.9542288	76.22150345	-0.00097256	0.185039759	0	0.011764706	257.6928	984.5459	653.4365	0.7322	3.7924	942	1.148649889	0.002653381	37.41924973	0.086438467
16.79901286	×ÔÉí³µÁ¾	Road 1	237.283913	76.22477875	-0.00097256	0.190653384	0	0.011764706	257.9896	984.5508	653.4214	0.7327	3.792	943	1.031422064	0.002382585	37.43530956	0.086475565
16.81571353	×ÔÉí³µÁ¾	Road 1	237.6375497	76.23001099	-0.00097256	0.25098744	0	0.011764706	258.2864	984.5547	653.4063	0.7351	3.7905	944	1.099284974	0.002539348	37.45366835	0.086517974
16.83241676	×ÔÉí³µÁ¾	Road 1	237.9912711	76.23705597	-0.00097256	0.259477377	0	0.011764706	258.5832	984.5596	653.3911	0.7356	3.79	945	1.170819249	0.002704592	37.47322481	0.086563149
16.84902652	×ÔÉí³µÁ¾	Road 1	238.3430539	76.24541931	-0.00097256	0.217903093	0	0.011764706	259.0497	984.5674	653.3672	0.7363	3.7894	946	1.224776476	0.002829234	37.49356806	0.086610142
16.86573232	×ÔÉí³µÁ¾	Road 1	238.6968896	76.24949112	-0.00097256	0.210767165	0	0.011764706	259.3466	984.5723	653.3521	0.7368	3.7889	947	1.053656376	0.002433946	37.51117023	0.086650803
16.88238386	×ÔÉí³µÁ¾	Road 1	239.0495954	76.25363846	-0.00097256	0.203211442	0	0.019607844	259.6434	984.5762	653.3369	0.7383	3.7875	948	1.057209609	0.002442154	37.5287744	0.086691469
16.89909332	×ÔÉí³µÁ¾	Road 1	239.4035399	76.25618591	-0.00097256	0.136934474	0	0.027450981	259.9828	984.582	653.3196	0.7386	3.7872	949	0.993571	0.002295149	37.54537644	0.08672982
16.91573167	×ÔÉí³µÁ¾	Road 1	239.7559632	76.25300674	-0.00097256	0.035072055	0	0.027450981	260.3645	984.5879	653.3001	0.7397	3.7862	950	0.893078941	0.002063012	37.5602358	0.086764145
16.93231431	×ÔÉí³µÁ¾	Road 1	240.1071803	76.24731445	-0.00097256	0.045506407	0	0.027450981	260.7038	984.5938	653.2828	0.74	3.7856	951	0.893034668	0.00206291	37.57504466	0.086798353
16.94902853	×ÔÉí³µÁ¾	Road 1	240.4611716	76.24455414	-0.00097256	0.112657554	0	0.027450981	261.043	984.5986	653.2654	0.7413	3.7839	952	0.893013199	0.00206286	37.58997069	0.086832832
16.96570464	×ÔÉí³µÁ¾	Road 1	240.8143554	76.24451981	-0.00097256	0.119773664	0	0.027450981	261.4883	984.6064	653.2427	0.7415	3.7835	953	0.893012932	0.00206286	37.60486267	0.086867233
16.98234372	×ÔÉí³µÁ¾	Road 1	241.1667411	76.24148483	-0.00097256	0.064790174	0	0.027450981	261.9336	984.6133	653.2199	0.7428	3.7823	954	0.892989326	0.002062805	37.61972119	0.086901556
16.99905465	×ÔÉí³µÁ¾	Road 1	241.5206345	76.23850479	-0.00097256	0.090241335	0	0.019607844	262.2304	984.6182	653.2048	0.7433	3.7818	955	0.892966148	0.002062752	37.63464348	0.086936026
17.01566478	×ÔÉí³µÁ¾	Road 1	241.8723975	76.23945923	-0.00097256	0.205130175	0	0.011764706	262.5273	984.623	653.1896	0.7438	3.7813	956	0.930832175	0.002150222	37.65010472	0.086971742
17.0323801	×ÔÉí³µÁ¾	Road 1	242.2264247	76.24726639	-0.00097256	0.316607326	0	0.011764706	262.8453	984.6279	653.1733	0.7447	3.7805	957	1.200780874	0.002773804	37.67017617	0.087018107
17.04897263	×ÔÉí³µÁ¾	Road 1	242.577897	76.25721588	-0.00097256	0.291170746	0	0.011764706	263.1634	984.6328	653.1571	0.7456	3.7796	958	1.288254388	0.002975868	37.69155157	0.087067484
17.06565057	×ÔÉí³µÁ¾	Road 1	242.9312093	76.26386948	-0.00097256	0.182611108	0	0.011764706	263.5451	984.6387	653.1376	0.7476	3.7786	959	1.156085419	0.002670557	37.71083269	0.087112024
17.08230322	×ÔÉí³µÁ¾	Road 1	243.2840003	76.26702805	-0.000968969	0.172854558	0	0.011764706	263.8633	984.6445	653.1213	0.7476	3.7787	960	1.018198935	0.00235204	37.7277884	0.087151191
17.09913071	×ÔÉí³µÁ¾	Road 1	243.6405222	76.27273407	-0.000968969	0.229098201	0	0.011764706	264.1602	984.6494	653.1062	0.7481	3.7782	961	1.11673379	0.002579655	37.74658023	0.0871946
17.11568915	×ÔÉí³µÁ¾	Road 1	243.991387	76.28214111	-0.000968969	0.26684013	0	0.011764706	264.6269	984.6563	653.0824	0.7497	3.7766	962	1.267797782	0.002928613	37.76757298	0.087243094
17.13236819	×ÔÉí³µÁ¾	Road 1	244.3448266	76.28630905	-0.000968969	0.231275484	0	0.011764706	264.9239	984.6611	653.0671	0.7501	3.7761	963	1.058077571	0.002444159	37.7852207	0.08728386
17.1490443	×ÔÉí³µÁ¾	Road 1	244.6982333	76.29263992	-0.000968969	0.200933665	0	0.011764706	265.3907	984.6689	653.0433	0.7507	3.7755	964	1.143678938	0.002641898	37.80429281	0.087327916
17.16564269	×ÔÉí³µÁ¾	Road 1	245.0500124	76.29683533	-0.000968969	0.223596573	0	0.011764706	265.6877	984.6738	653.0281	0.7513	3.775	965	1.060073656	0.00244877	37.82188833	0.087368562
17.18233419	×ÔÉí³µÁ¾	Road 1	245.4037997	76.30434036	-0.000968969	0.244189844	0	0.011764706	266.006	984.6787	653.0119	0.7522	3.7742	966	1.189960155	0.002748808	37.84175055	0.087414444
17.19903779	×ÔÉí³µÁ¾	Road 1	245.757875	76.31119308	-0.000968969	0.232308686	0	0.011764706	266.4517	984.6865	652.9892	0.7524	3.7739	967	1.164073616	0.00268901	37.86119477	0.08745936
17.21571573	×ÔÉí³µÁ¾	Road 1	246.1114331	76.31692657	-0.000968969	0.217866182	0	0.011764706	266.7488	984.6914	652.974	0.753	3.7734	968	1.120298415	0.002587889	37.87987904	0.087502521
17.23233465	×ÔÉí³µÁ¾	Road 1	246.4637562	76.32041473	-0.000968969	0.218385562	0	0.011764706	267.0459	984.6963	652.9589	0.7535	3.7729	969	1.032035465	0.002384002	37.89703035	0.08754214
17.24908663	×ÔÉí³µÁ¾	Road 1	246.8189356	76.32804337	-0.000968969	0.233645141	0	0.011764706	267.5129	984.7031	652.9349	0.7551	3.7713	970	1.19403209	0.002758214	37.91703276	0.087588346
17.26563151	×ÔÉí³µÁ¾	Road 1	247.169749	76.33346786	-0.000968969	0.233839765	0	0.011764706	267.8101	984.708	652.9197	0.7556	3.7708	971	1.109980924	0.002564056	37.93539726	0.087630768
17.28231788	×ÔÉí³µÁ¾	Road 1	247.5235991	76.34137802	-0.000968969	0.226807252	0	0.011764706	268.2771	984.7158	652.8959	0.7563	3.7712	972	1.206499289	0.002787013	37.95552935	0.087677273
17.29898739	×ÔÉí³µÁ¾	Road 1	247.877114	76.34621887	-0.000966282	0.222988278	0	0.011764706	268.5744	984.7207	652.8807	0.7568	3.7707	973	1.085399607	0.002507273	37.97362243	0.087719068
17.31569758	×ÔÉí³µÁ¾	Road 1	248.2315139	76.35097046	-0.000966282	0.226386592	0	0.011764706	268.8716	984.7256	652.8656	0.7583	3.7702	974	1.081457465	0.002498167	37.99169379	0.087760813
17.33240191	×ÔÉí³µÁ¾	Road 1	248.5858242	76.35846176	-0.000966282	0.229656801	0	0.011764706	269.3176	984.7334	652.8428	0.7586	3.77	975	1.189821078	0.002748487	38.01156896	0.087806724
17.34939472	×ÔÉí³µÁ¾	Road 1	248.9462776	76.3636116	-0.000966282	0.227689192	0	0.011764706	269.6149	984.7383	652.8276	0.7591	3.7695	976	1.093931597	0.002526982	38.03015793	0.087849665
17.365716	×ÔÉí³µÁ¾	Road 1	249.2925083	76.36843185	-0.000966282	0.22622253	0	0.011764706	269.9122	984.7432	652.8124	0.7596	3.769	977	1.088884255	0.002515323	38.04792991	0.087890718
17.38236168	×ÔÉí³µÁ¾	Road 1	249.6456469	76.37408981	-0.000966282	0.225703806	0	0.011764706	270.252	984.749	652.795	0.7599	3.7687	978	1.11835785	0.002583407	38.06654574	0.087933721
17.39898281	×ÔÉí³µÁ¾	Road 1	249.9982905	76.37974777	-0.000965388	0.227427602	0	0.011764706	270.5919	984.7539	652.7777	0.7612	3.7675	979	1.11874998	0.002584312	38.08514062	0.087976675
17.41563729	×ÔÉí³µÁ¾	Road 1	250.3516699	76.38580399	-0.000962707	0.228156686	0	0.011764706	270.953	984.7598	652.7593	0.7619	3.7668	980	1.134149026	0.002619884	38.10402928	0.088020308
17.43234565	×ÔÉí³µÁ¾	Road 1	250.7062271	76.39324036	-0.000960923	0.226323783	0	0.011764706	271.3991	984.7676	652.7365	0.7622	3.7665	981	1.187984649	0.002744245	38.12387856	0.088066159
17.44896934	×ÔÉí³µÁ¾	Road 1	251.0590215	76.40060806	-0.000955584	0.225956038	0	0.011764706	271.8453	984.7754	652.7137	0.7625	3.7662	982	1.18684009	0.002741601	38.14360822	0.088111735
17.46569016	×ÔÉí³µÁ¾	Road 1	251.4139002	76.40552444	-0.000954696	0.226435974	0	0.011764706	272.1428	984.7803	652.6985	0.763	3.7657	983	1.088403706	0.002514213	38.16180723	0.088153775
17.48230615	×ÔÉí³µÁ¾	Road 1	251.7665773	76.41059189	-0.00095115	0.226976514	0	0.011764706	272.4402	984.7852	652.6833	0.7636	3.7652	984	1.095683937	0.00253103	38.1800131	0.08819583
17.49899362	×ÔÉí³µÁ¾	Road 1	252.1207944	76.41551514	-0.000950264	0.226497218	0	0.011764706	272.7378	984.79	652.6681	0.7641	3.7647	985	1.089166624	0.002515975	38.19818853	0.088237816
17.51563197	×ÔÉí³µÁ¾	Road 1	252.4739945	76.4210495	-0.000947612	0.225868657	0	0.011764706	273.0778	984.7959	652.6508	0.7644	3.7643	986	1.114054376	0.002573466	38.21672456	0.088280634
17.53238945	×ÔÉí³µÁ¾	Road 1	252.8297512	76.42700958	-0.000946729	0.226278692	0	0.011764706	273.4391	984.8018	652.6323	0.7651	3.7636	987	1.129334196	0.002608762	38.23564936	0.08832435
17.54903953	×ÔÉí³µÁ¾	Road 1	253.1832654	76.43512573	-0.000946729	0.227108702	0	0.011764706	273.928	984.8096	652.6074	0.7662	3.7626	988	1.216466368	0.002810037	38.25590362	0.088371137
17.56564196	×ÔÉí³µÁ¾	Road 1	253.5357905	76.44004898	-0.000946729	0.225786492	0	0.011764706	274.2256	984.8145	652.5922	0.7677	3.762	989	1.090418242	0.002518866	38.27400721	0.088412957
17.58237378	×ÔÉí³µÁ¾	Road 1	253.8910862	76.44503403	-0.000946729	0.225941151	0	0.011764706	274.5232	984.8203	652.577	0.7672	3.7625	990	1.091394698	0.002521122	38.29226823	0.08845514
17.59899124	×ÔÉí³µÁ¾	Road 1	254.2439774	76.4502182	-0.000946729	0.226596296	0	0.011764706	274.8421	984.8252	652.5607	0.7681	3.7616	991	1.100719461	0.002542662	38.31055939	0.088497392
17.61566698	×ÔÉí³µÁ¾	Road 1	254.5981342	76.45626755	-0.000946729	0.225088462	0	0.011764706	275.2036	984.8311	652.5422	0.7688	3.7609	992	1.134340157	0.002620326	38.32947535	0.088541088
17.63230239	×ÔÉí³µÁ¾	Road 1	254.9514737	76.46467896	-0.000946729	0.226302832	0	0.011764706	275.7139	984.8398	652.5161	0.7693	3.7604	993	1.22883181	0.002838601	38.34991748	0.088588309
17.64899023	×ÔÉí³µÁ¾	Road 1	255.3059492	76.4695816	-0.000946729	0.225434378	0	0.011764706	276.0116	984.8447	652.5009	0.7699	3.7599	994	1.088905012	0.002515371	38.36808895	0.088630285
17.66569713	×ÔÉí³µÁ¾	Road 1	255.6608523	76.47448425	-0.000944965	0.226708665	0	0.011764706	276.3093	984.8496	652.4857	0.7704	3.7593	995	1.08873408	0.002514976	38.38627832	0.088672303
17.68235747	×ÔÉí³µÁ¾	Road 1	256.0148017	76.48209915	-0.000944083	0.225615203	0	0.011764706	276.7773	984.8574	652.4619	0.7711	3.7587	996	1.196947312	0.002764948	38.40621987	0.088718368
17.69903174	×ÔÉí³µÁ¾	Road 1	256.3690698	76.48699493	-0.000939685	0.226444826	0	0.011764706	277.075	984.8633	652.4467	0.7706	3.7591	997	1.088970426	0.002515522	38.42437766	0.088760312
17.71570308	×ÔÉí³µÁ¾	Road 1	256.7233085	76.4944519	-0.000939685	0.22664547	0	0.011764706	277.3728	984.8682	652.4315	0.7711	3.7586	998	1.190628496	0.002750352	38.44422703	0.088806164
17.73235573	×ÔÉí³µÁ¾	Road 1	257.0771789	76.50036392	-0.000932676	0.280992597	0	0	277.8196	984.876	652.4086	0.7714	3.7583	999	1.129702365	0.002609612	38.46303956	0.088849621
17.74900581	×ÔÉí³µÁ¾	Road 1	257.4310426	76.51071167	-0.000930056	0.375382036	0.011764706	0	278.1174	984.8809	652.3934	0.772	3.7577	1000	1.305982616	0.00301682	38.48478428	0.088899852
17.76566322	×ÔÉí³µÁ¾	Road 1	257.7851537	76.53050079	-0.000928312	0.374332994	0.027450981	0	278.5643	984.8887	652.3706	0.7723	3.7574	1001	1.680853515	0.003882772	38.51278295	0.088964529
17.78240127	×ÔÉí³µÁ¾	Road 1	258.1410284	76.54108887	-0.000923963	0.309379697	0.043137256	0	278.8623	984.8936	652.3553	0.7728	3.7569	1002	1.313717603	0.003034688	38.53477202	0.089015323
17.79896888	×ÔÉí³µÁ¾	Road 1	258.493317	76.54931488	-0.00092136	0.287176907	0.074509807	0	279.1603	984.8984	652.3401	0.7733	3.7564	1003	1.223827057	0.002827041	38.55504791	0.089062161
17.81562519	×ÔÉí³µÁ¾	Road 1	258.8475565	76.56330872	-0.000920493	0.346884429	0.098039217	0	279.6074	984.9063	652.3173	0.7746	3.7561	1004	1.451335161	0.003352584	38.5792218	0.089118002
17.83234675	×ÔÉí³µÁ¾	Road 1	259.2032386	76.57513275	-0.000918762	0.371745735	0.121568628	0	279.9055	984.9111	652.3021	0.7752	3.7555	1005	1.363487794	0.003149657	38.60202144	0.08917067
17.84907124	×ÔÉí³µÁ¾	Road 1	259.5590384	76.58704605	-0.000918762	0.354319394	0.121568628	0	280.2037	984.916	652.2869	0.7757	3.755	1006	1.367103227	0.003158008	38.62488554	0.089223486
17.86564764	×ÔÉí³µÁ¾	Road 1	259.9117425	76.59893188	-0.000917897	0.320599765	0.121568628	0	280.5445	984.9219	652.2695	0.776	3.7547	1007	1.37038442	0.003165588	38.64760159	0.08927596
17.88229259	×ÔÉí³µÁ¾	Road 1	260.2659722	76.61345444	-0.000917897	0.328921407	0.121568628	0	280.9919	984.9297	652.2466	0.7763	3.7543	1008	1.473496022	0.003403776	38.67212785	0.089332615
17.89896466	×ÔÉí³µÁ¾	Road 1	260.620829	76.62420731	-0.000917897	0.353379965	0.113725491	0	281.2902	984.9346	652.2313	0.7769	3.7538	1009	1.323020525	0.003056177	38.69418535	0.089383568
17.91569942	×ÔÉí³µÁ¾	Road 1	260.9771055	76.64260941	-0.000917897	0.361354291	0.113725491	0	281.7591	984.9434	652.2074	0.7766	3.7541	1010	1.624357007	0.003752265	38.72136856	0.089446361
17.93234803	×ÔÉí³µÁ¾	Road 1	261.3316011	76.65409698	-0.000917897	0.35339427	0.113725491	0	282.0575	984.9482	652.1921	0.7771	3.7535	1011	1.353251249	0.00312601	38.74389832	0.089498405
17.94899958	×ÔÉí³µÁ¾	Road 1	261.686211	76.66528931	-0.000917897	0.354859889	0.113725491	0	282.356	984.9531	652.1769	0.7777	3.753	1012	1.341578429	0.003099046	38.76623767	0.089550009
17.9656064	×ÔÉí³µÁ¾	Road 1	262.0399224	76.67695541	-0.000917897	0.366726458	0.113725491	0	282.6545	984.958	652.1617	0.7782	3.7525	1013	1.361838242	0.003145846	38.78885349	0.089602252
17.9823056	×ÔÉí³µÁ¾	Road 1	262.395705	76.69933319	-0.000917897	0.384210497	0.113725491	0	283.1877	984.9678	652.1345	0.7781	3.7525	1014	1.784651792	0.004122546	38.81865574	0.089671095
17.99900663	×ÔÉí³µÁ¾	Road 1	262.7515863	76.71219406	-0.000917897	0.383382022	0.113725491	0	283.4863	984.9727	652.1192	0.7787	3.752	1015	1.407117889	0.003250442	38.84215606	0.089725381
18.01562812	×ÔÉí³µÁ¾	Road 1	263.1058361	76.7259407	-0.000917897	0.380702585	0.113725491	0	283.8063	984.9785	652.1029	0.7786	3.752	1016	1.445088665	0.003338155	38.86617559	0.089780866
18.0322771	×ÔÉí³µÁ¾	Road 1	263.4607599	76.74497452	-0.000917897	0.384459078	0.113725491	0	284.2545	984.9863	652.08	0.779	3.7517	1017	1.655041633	0.003823146	38.89373034	0.089844517
18.04892791	×ÔÉí³µÁ¾	Road 1	263.8157829	76.75798645	-0.000917897	0.389557034	0.121568628	0	284.5533	984.9912	652.0648	0.7805	3.7512	1018	1.415336308	0.003269427	38.91729684	0.089898956
18.06566927	×ÔÉí³µÁ¾	Road 1	264.1727979	76.77121124	-0.000917897	0.392514557	0.121568628	0	284.8522	984.9961	652.0495	0.781	3.7506	1019	1.421158945	0.003282877	38.94108896	0.089953916
18.08228489	×ÔÉí³µÁ¾	Road 1	264.5272238	76.79117889	-0.000917897	0.393832535	0.121568628	0	285.3006	985.0039	652.0266	0.7813	3.7503	1020	1.694668386	0.003914684	38.96924694	0.09001896
18.09953979	×ÔÉí³µÁ¾	Road 1	264.8953504	76.80461655	-0.000917897	0.394513726	0.121568628	0	285.5996	985.0098	652.0114	0.7809	3.7507	1021	1.414229776	0.003266871	38.99364933	0.09007533
18.11563197	×ÔÉí³µÁ¾	Road 1	265.2387305	76.81794434	-0.000917897	0.396901637	0.121568628	0	285.8986	985.0146	651.9961	0.7814	3.7502	1022	1.447243133	0.003343132	39.01693863	0.090129128
18.13230954	×ÔÉí³µÁ¾	Road 1	265.5946966	76.83839264	-0.000917897	0.400028348	0.121568628	0	286.3473	985.0225	651.9731	0.7817	3.7498	1023	1.71169484	0.003954015	39.04548554	0.090195072
18.14899005	×ÔÉí³µÁ¾	Road 1	265.9507932	76.85305252	-0.000917897	0.401298046	0.137254909	0	286.6679	985.0283	651.9568	0.7816	3.7499	1024	1.481398006	0.003422029	39.070196	0.090252153
18.16572627	×ÔÉí³µÁ¾	Road 1	266.3081427	76.86671677	-0.000917897	0.403296322	0.145098045	0	286.9671	985.0332	651.9415	0.7821	3.7493	1025	1.440154003	0.003326756	39.09429874	0.09030783
18.18228251	×ÔÉí³µÁ¾	Road 1	266.6617504	76.88868256	-0.000917897	0.407851338	0.160784319	0	287.4375	985.042	651.9175	0.7819	3.7495	1026	1.779474682	0.004110587	39.12376015	0.090375886
18.19900847	×ÔÉí³µÁ¾	Road 1	267.0190482	76.90276566	-0.000917897	0.412443638	0.184313729	0	287.7368	985.0469	651.9022	0.7824	3.749	1027	1.457661462	0.003367198	39.14814094	0.090432206
18.21574725	×ÔÉí³µÁ¾	Road 1	267.3767169	76.92355728	-0.000917897	0.418527722	0.20784314	0	288.0363	985.0527	651.887	0.7819	3.7494	1028	1.723910458	0.003982233	39.17699711	0.090498863
18.23232659	×ÔÉí³µÁ¾	Road 1	267.7310519	76.93953552	-0.000917897	0.428369641	0.223529413	0	288.4856	985.0605	651.864	0.7822	3.7491	1029	1.539154943	0.003555448	39.20251527	0.09055781
18.24949204	×ÔÉí³µÁ¾	Road 1	268.0979916	76.95586395	-0.000917897	0.437776417	0.262745112	0	288.8065	985.0654	651.8476	0.7832	3.7481	1030	1.531099748	0.00353684	39.2287973	0.090618522
18.26566377	×ÔÉí³µÁ¾	Road 1	268.4437595	76.97167053	-0.000920493	0.447435826	0.278431386	0	289.1062	985.0713	651.8323	0.7827	3.7485	1031	1.548769669	0.003577658	39.25384357	0.090676379
18.28237323	×ÔÉí³µÁ¾	Road 1	268.8011397	76.9964035	-0.000920493	0.464859247	0.309803933	0	289.5558	985.0791	651.8093	0.783	3.7491	1032	1.883614398	0.004351149	39.28531776	0.090749084
18.29897053	×ÔÉí³µÁ¾	Road 1	269.1561999	77.01356964	-0.00092136	0.473187447	0.31764707	0	289.8556	985.084	651.794	0.7845	3.7486	1033	1.587277561	0.003666611	39.31166227	0.09080994
18.31565176	×ÔÉí³µÁ¾	Road 1	269.513137	77.03106537	-0.000923963	0.479264379	0.34117648	0	290.1555	985.0898	651.7787	0.7841	3.749	1034	1.597255765	0.003689661	39.33830648	0.090871488
18.33230441	×ÔÉí³µÁ¾	Road 1	269.8695926	77.0592247	-0.000923963	0.49141115	0.349019617	0	290.6268	985.0977	651.7546	0.7848	3.7482	1035	2.025243263	0.004678312	39.37203213	0.090949394
18.3490388	×ÔÉí³µÁ¾	Road 1	270.2278844	77.07783966	-0.000923963	0.502039492	0.349019617	0	290.9269	985.1035	651.7393	0.7844	3.7487	1036	1.640364937	0.003789243	39.39948264	0.091012805
18.36565076	×ÔÉí³µÁ¾	Road 1	270.5836424	77.09679794	-0.000923963	0.511409342	0.349019617	0	291.227	985.1084	651.724	0.7849	3.7481	1037	1.659922737	0.003834422	39.4270572	0.091076502
18.38225392	×ÔÉí³µÁ¾	Road 1	270.939354	77.12759399	-0.000923963	0.521126211	0.349019617	0	291.6988	985.1172	651.7	0.7846	3.7484	1038	2.135943551	0.00493403	39.46252062	0.091158423
18.39894065	×ÔÉí³µÁ¾	Road 1	271.2969551	77.14894867	-0.000923963	0.527951777	0.356862754	0	292.0206	985.123	651.6835	0.7846	3.7484	1039	1.753156352	0.004049791	39.49177508	0.091226
18.41570217	×ÔÉí³µÁ¾	Road 1	271.656253	77.16919785	-0.000923963	0.534454882	0.356862754	0	292.321	985.1279	651.6682	0.7851	3.7479	1040	1.705757947	0.003940301	39.52036616	0.091292046
18.432276	×ÔÉí³µÁ¾	Road 1	272.0116709	77.20025482	-0.000923963	0.542236567	0.356862754	0	292.6429	985.1338	651.6517	0.7851	3.7479	1041	2.150361528	0.004967335	39.5560059	0.091374374
18.44901919	×ÔÉí³µÁ¾	Road 1	272.3708256	77.22287979	-0.000923963	0.551244318	0.356862754	0	293.0938	985.1416	651.6287	0.7854	3.7476	1042	1.802287599	0.004163284	39.58618193	0.09144408
18.46559412	×ÔÉí³µÁ¾	Road 1	272.7264697	77.24425507	-0.000923963	0.55508393	0.356862754	0	293.3945	985.1475	651.6134	0.785	3.748	1043	1.761542474	0.004069163	39.61537939	0.091511526
18.4822717	×ÔÉí³µÁ¾	Road 1	273.0844661	77.27666473	-0.000923963	0.561466813	0.356862754	0	293.8458	985.1553	651.5903	0.7853	3.7476	1044	2.198554793	0.005078662	39.65204594	0.091596226
18.49900975	×ÔÉí³µÁ¾	Road 1	273.4438698	77.30010681	-0.000923963	0.565323114	0.356862754	0	294.1682	985.1611	651.5739	0.7853	3.7477	1045	1.836668374	0.004242704	39.6827882	0.091667241
18.51557552	×ÔÉí³µÁ¾	Road 1	273.7996759	77.3221962	-0.000923963	0.569578767	0.356862754	0	294.4691	985.167	651.5585	0.7849	3.7481	1046	1.792291097	0.004140192	39.71247888	0.091735826
18.53231761	×ÔÉí³µÁ¾	Road 1	274.1594245	77.35564957	-0.000923963	0.573774815	0.356862754	0	294.9208	985.1748	651.5355	0.7852	3.7477	1047	2.237147527	0.005167811	39.7499334	0.091822346
18.54899151	×ÔÉí³µÁ¾	Road 1	274.5178195	77.37971649	-0.000923963	0.576292694	0.356862754	0	295.2436	985.1807	651.519	0.7862	3.7478	1048	1.866905683	0.004312552	39.78106201	0.091894253
18.56560457	×ÔÉí³µÁ¾	Road 1	274.8750109	77.40230026	-0.000923963	0.579209983	0.356862754	0	295.5449	985.1865	651.5036	0.7859	3.7482	1049	1.811199006	0.00418387	39.81115156	0.09196376
18.58224769	×ÔÉí³µÁ¾	Road 1	275.2330061	77.43639908	-0.000928312	0.582145214	0.356862754	0	295.997	985.1943	651.4805	0.7863	3.7478	1050	2.273061379	0.005250772	39.84898239	0.092051149
18.59892672	×ÔÉí³µÁ¾	Road 1	275.5918876	77.46089859	-0.000929184	0.584205866	0.356862754	0	296.3201	985.2002	651.4641	0.7863	3.7478	1051	1.885608976	0.004355757	39.88043253	0.092123799
18.61559843	×ÔÉí³µÁ¾	Road 1	275.950718	77.48393555	-0.000932676	0.585604846	0.349019617	0	296.6217	985.2061	651.4486	0.786	3.7482	1052	1.827787957	0.00422219	39.91090487	0.09219419
18.63230679	×ÔÉí³µÁ¾	Road 1	276.3104971	77.51836395	-0.000937052	0.586574674	0.349019617	0	297.0743	985.2139	651.4255	0.7864	3.7479	1053	2.283000386	0.005273731	39.94905007	0.092282306
18.64901882	×ÔÉí³µÁ¾	Road 1	276.6704625	77.54146957	-0.000944083	0.586235821	0.34117648	0	297.3762	985.2197	651.4101	0.786	3.7483	1054	1.829441212	0.004226009	39.97962374	0.092352931
18.66566267	×ÔÉí³µÁ¾	Road 1	277.0291185	77.57590485	-0.000947612	0.585927904	0.34117648	0	297.8291	985.2275	651.387	0.7865	3.7479	1055	2.290102379	0.005290136	40.01773986	0.092440979
18.68228599	×ÔÉí³µÁ¾	Road 1	277.3874383	77.5989006	-0.000954696	0.58623755	0.34117648	0	298.1312	985.2334	651.3716	0.7861	3.7483	1056	1.831090243	0.004229818	40.04817866	0.092511293
18.6989445	×ÔÉí³µÁ¾	Road 1	277.7466312	77.62364731	-0.000960923	0.585916281	0.34117648	0	298.4549	985.2393	651.355	0.7862	3.7483	1057	1.900105766	0.004389244	40.0798316	0.092584411
18.71562097	×ÔÉí³µÁ¾	Road 1	278.1063706	77.65802765	-0.000962707	0.586406827	0.34117648	0	298.9084	985.2471	651.3319	0.7866	3.7479	1058	2.287284109	0.005283626	40.11797543	0.092672523
18.73228022	×ÔÉí³µÁ¾	Road 1	278.4658444	77.68092041	-0.000966282	0.585710406	0.34117648	0	299.2108	985.2529	651.3165	0.7863	3.7483	1059	1.82655729	0.004219347	40.14840449	0.092742814
18.7656218	×ÔÉí³µÁ¾	Road 1	279.1857017	77.72536011	-0.000968969	0.584643066	0.333333343	0	299.7942	985.2637	651.2867	0.7862	3.7484	1060	1.799558319	0.00415698	40.20840461	0.092881415
18.78233419	×ÔÉí³µÁ¾	Road 1	279.5467107	77.7645813	-0.00097256	0.582734168	0.333333343	0	300.3131	985.2725	651.2602	0.7869	3.7479	1061	2.481602289	0.005732501	40.24987812	0.092977218
18.79892232	×ÔÉí³µÁ¾	Road 1	279.9051476	77.78892975	-0.000973459	0.582007885	0.309803933	0	300.6375	985.2793	651.2437	0.7861	3.7488	1062	1.891614932	0.00436963	40.28125648	0.093049702
18.81566551	×ÔÉí³µÁ¾	Road 1	280.2670407	77.81165771	-0.000973459	0.57934159	0.309803933	0	300.9404	985.2842	651.2281	0.7867	3.7482	1063	1.817878038	0.004199298	40.31169355	0.093120012
18.83233465	×ÔÉí³µÁ¾	Road 1	280.6274898	77.84546127	-0.000973459	0.574406326	0.301960796	0	301.3949	985.293	651.205	0.7861	3.748	1064	2.26942338	0.005242368	40.34952289	0.093207398
18.8489741	×ÔÉí³µÁ¾	Road 1	280.9874075	77.869384	-0.000973459	0.571662247	0.301960796	0	301.7197	985.2988	651.1884	0.7862	3.748	1065	1.873003379	0.004326638	40.38068864	0.093279391
18.86560805	×ÔÉí³µÁ¾	Road 1	281.3473088	77.89157639	-0.000974358	0.568995893	0.294117659	0	302.0229	985.3047	651.1729	0.7858	3.7483	1066	1.803769217	0.004166707	40.41069245	0.0933487
18.8822442	×ÔÉí³µÁ¾	Road 1	281.7074105	77.9246315	-0.000976159	0.565798521	0.294117659	0	302.4779	985.3125	651.1497	0.7863	3.7478	1067	2.243850537	0.005183295	40.44802148	0.09343493
18.91568549	×ÔÉí³µÁ¾	Road 1	282.4317062	77.97142639	-0.000980671	0.561307549	0.286274523	0	303.1282	985.3242	651.1165	0.7863	3.7478	1068	1.84905793	0.004271324	40.50985635	0.093577768
18.93231211	×ÔÉí³µÁ¾	Road 1	282.7919668	78.00371933	-0.000983384	0.555245101	0.286274523	0	303.5837	985.333	651.0932	0.7858	3.7483	1069	2.215702705	0.005118273	40.546696	0.093662868
18.94898968	×ÔÉí³µÁ¾	Road 1	283.1534301	78.02501907	-0.000991555	0.553647518	0.286274523	0	303.8874	985.3389	651.0777	0.7855	3.7487	1070	1.767912868	0.004083879	40.57618049	0.093730977
18.96567898	×ÔÉí³µÁ¾	Road 1	283.5152534	78.0478363	-0.000995201	0.551859498	0.286274523	0	304.1912	985.3447	651.0622	0.7851	3.7491	1071	1.829047737	0.0042251	40.60670602	0.093801491
18.98224365	×ÔÉí³µÁ¾	Road 1	283.8745142	78.0781311	-0.000999771	0.549514055	0.286274523	0	304.6471	985.3525	651.0389	0.7856	3.7486	1072	2.141070481	0.004945873	40.64217215	0.093883418
18.99894945	×ÔÉí³µÁ¾	Road 1	284.2369335	78.09922485	-0.001009874	0.548126221	0.286274523	0	304.9511	985.3584	651.0234	0.7852	3.749	1073	1.75953279	0.004064521	40.67156655	0.093951319
19.01561309	×ÔÉí³µÁ¾	Road 1	284.5985361	78.12033234	-0.001017265	0.54605937	0.278431386	0	305.2552	985.3643	651.0079	0.7849	3.7493	1074	1.762639632	0.004071698	40.70093855	0.094019168
19.03231962	×ÔÉí³µÁ¾	Road 1	284.9612284	78.15460281	-0.001024691	0.543553293	0.278431386	0	305.755	985.373	650.9824	0.7852	3.749	1075	2.293049285	0.005296944	40.73924744	0.094107662
19.04893964	×ÔÉí³µÁ¾	Road 1	285.3221386	78.17538757	-0.001034025	0.541726112	0.278431386	0	306.0593	985.3789	650.9669	0.7848	3.7494	1076	1.752801266	0.004048971	40.76837904	0.094174956
19.06564471	×ÔÉí³µÁ¾	Road 1	285.684992	78.1961792	-0.001044357	0.540066779	0.278431386	0	306.3637	985.3848	650.9513	0.7845	3.7497	1077	1.749163734	0.004040568	40.79759893	0.094242454
19.08225667	×ÔÉí³µÁ¾	Road 1	286.0459721	78.2284996	-0.00105381	0.538882911	0.278431386	0	306.8423	985.3936	650.9269	0.7844	3.7489	1078	2.223499895	0.005136285	40.83453562	0.094327777
19.09897456	×ÔÉí³µÁ¾	Road 1	286.4093501	78.24914703	-0.001062366	0.537665725	0.278431386	0	307.1469	985.3994	650.9114	0.784	3.7492	1079	1.743668559	0.004027874	40.86368608	0.094395115
19.11568036	×ÔÉí³µÁ¾	Road 1	286.7725735	78.27248611	-0.001069052	0.536537349	0.278431386	0	307.4515	985.4053	650.8958	0.7837	3.7495	1080	1.853660128	0.004281955	40.89465295	0.094466648
19.13226372	×ÔÉí³µÁ¾	Road 1	287.1332632	78.30030899	-0.001070968	0.534869671	0.278431386	0	307.9087	985.4141	650.8724	0.7832	3.75	1081	2.04408808	0.004721843	40.92855081	0.094544952
19.14900141	×ÔÉí³µÁ¾	Road 1	287.4974104	78.32205505	-0.001072886	0.534151971	0.278431386	0	308.2354	985.4199	650.8558	0.7833	3.75	1082	1.788441035	0.004131299	40.95848518	0.094614101
19.16566212	×ÔÉí³µÁ¾	Road 1	287.8599775	78.34248962	-0.001073846	0.533383012	0.278431386	0	308.5403	985.4258	650.8402	0.783	3.7503	1083	1.739612714	0.004018505	40.98746836	0.094681052
19.18225245	×ÔÉí³µÁ¾	Road 1	288.2211401	78.37006531	-0.001073846	0.533913612	0.278431386	0	308.8454	985.4316	650.8247	0.7826	3.7506	1084	2.035077463	0.004701029	41.02123097	0.094759044
19.19896338	×ÔÉí³µÁ¾	Road 1	288.5850422	78.39465408	-0.001073846	0.531867981	0.278431386	0	309.3249	985.4404	650.8002	0.7825	3.7507	1085	1.906443598	0.004403885	41.05308942	0.094832637
19.21567394	×ÔÉí³µÁ¾	Road 1	288.9490302	78.41488953	-0.001073846	0.53172797	0.278431386	0	309.6302	985.4463	650.7846	0.7822	3.751	1086	1.73039094	0.003997203	41.08200522	0.094899432
19.23225951	×ÔÉí³µÁ¾	Road 1	289.3103952	78.43652573	-0.001073846	0.530829847	0.278431386	0	309.9573	985.4521	650.7679	0.7822	3.751	1087	1.794204135	0.004144612	41.11176311	0.094968173
19.2490782	×ÔÉí³µÁ¾	Road 1	289.6769475	78.45959015	-0.001073846	0.530270159	0.278431386	0	310.3064	985.459	650.7501	0.7815	3.7515	1088	1.839946946	0.004250277	41.14270862	0.095039657
19.26610107	×ÔÉí³µÁ¾	Road 1	290.0481124	78.49403915	-0.001073846	0.53036207	0.278431386	0	310.8301	985.4688	650.7234	0.7811	3.7517	1089	2.282964942	0.005273649	41.18157123	0.09512943
19.28225373	×ÔÉí³µÁ¾	Road 1	290.4004006	78.51570969	-0.001073846	0.529193521	0.278431386	0	311.1576	985.4756	650.7067	0.7804	3.7526	1090	1.820874075	0.004206219	41.2109832	0.095197371
19.29893534	×ÔÉí³µÁ¾	Road 1	290.7643177	78.5357048	-0.001073846	0.529314101	0.278431386	0	311.4633	985.4805	650.691	0.7811	3.752	1091	1.724246109	0.003983009	41.23974639	0.095263814
19.31563637	×ÔÉí³µÁ¾	Road 1	291.1287519	78.55580978	-0.001073846	0.529244959	0.278431386	0	311.7691	985.4863	650.6754	0.781	3.7513	1092	1.728128969	0.003991978	41.26860792	0.095330484
19.33223806	×ÔÉí³µÁ¾	Road 1	291.4911705	78.58877563	-0.001073846	0.529076397	0.278431386	0	312.2717	985.4961	650.6498	0.7803	3.752	1093	2.259570191	0.005219607	41.30612062	0.095417139
19.34900654	×ÔÉí³µÁ¾	Road 1	291.8573302	78.61028824	-0.001073846	0.528578401	0.294117659	0	312.5996	985.5029	650.6331	0.7794	3.7529	1094	1.782842984	0.004118367	41.33601618	0.095486197
19.36558404	×ÔÉí³µÁ¾	Road 1	292.2194191	78.63188324	-0.001073846	0.529158533	0.294117659	0	312.9275	985.5088	650.6163	0.7795	3.7528	1095	1.79666881	0.004150305	41.36580046	0.095554999
19.3823144	×ÔÉí³µÁ¾	Road 1	292.5849941	78.6635994	-0.001073846	0.531636953	0.294117659	0	313.4087	985.5176	650.5918	0.7795	3.7528	1096	2.200298983	0.005082691	41.40261224	0.095640034
19.40224222	×ÔÉí³µÁ¾	Road 1	293.0205966	78.69243164	-0.001073846	0.533035815	0.301960796	0	313.8463	985.5264	650.5695	0.7777	3.7535	1097	1.895802763	0.004379304	41.44039147	0.095727304
19.41699024	×ÔÉí³µÁ¾	Road 1	293.3430153	78.70258026	-0.001073846	0.533426523	0.309803933	0	313.9995	985.5293	650.5616	0.7775	3.7535	1098	1.380132723	0.003188107	41.46074569	0.095774323
19.43269094	×ÔÉí³µÁ¾	Road 1	293.6863758	78.72883072	-0.001073846	0.534875631	0.309803933	0	314.3497	985.5361	650.5438	0.7771	3.7538	1099	2.049680529	0.004734762	41.49292711	0.095848662
19.44897703	×ÔÉí³µÁ¾	Road 1	294.0426702	78.75800629	-0.001073846	0.538042247	0.309803933	0	314.8315	985.5449	650.5192	0.777	3.7539	1100	2.131635451	0.004924078	41.52764312	0.095928856
19.46576201	×ÔÉí³µÁ¾	Road 1	294.4099748	78.77860565	-0.001073846	0.540121198	0.31764707	0	315.1381	985.5508	650.5035	0.7767	3.7543	1101	1.74812875	0.004038177	41.55698541	0.095996636
19.48230065	×ÔÉí³µÁ¾	Road 1	294.7719842	78.79929428	-0.001073846	0.542189479	0.31764707	0	315.4449	985.5566	650.4879	0.7764	3.7548	1102	1.764629341	0.004076294	41.58616999	0.096064053
19.49891188	×ÔÉí³µÁ¾	Road 1	295.135726	78.83045425	-0.001073846	0.543429077	0.325490206	0	315.7736	985.5635	650.4711	0.7756	3.7558	1103	2.190789646	0.005060724	41.62256169	0.096148118
19.51600293	×ÔÉí³µÁ¾	Road 1	295.5100885	78.85444565	-0.001073846	0.546538055	0.325490206	0	316.256	985.5723	650.4465	0.7755	3.7558	1104	1.869757234	0.004319139	41.6545178	0.096221936
19.53234693	×ÔÉí³µÁ¾	Road 1	295.8681832	78.87546387	-0.001073846	0.548625886	0.333333343	0	316.563	985.5791	650.4308	0.7743	3.757	1105	1.789940652	0.004134763	41.6837726	0.096289515
19.54893323	×ÔÉí³µÁ¾	Road 1	296.2317329	78.90722122	-0.001073846	0.552851021	0.34117648	0	317.0237	985.5879	650.4073	0.7739	3.7565	1106	2.219103546	0.005126129	41.72057932	0.096374538
19.56555289	×ÔÉí³µÁ¾	Road 1	296.5961122	78.9285553	-0.001073846	0.55536902	0.34117648	0	317.331	985.5938	650.3916	0.7736	3.7568	1107	1.789356785	0.004133414	41.75031781	0.096443234
19.58223082	×ÔÉí³µÁ¾	Road 1	296.9618688	78.9500267	-0.001073846	0.558325708	0.349019617	0	317.6383	985.5996	650.3759	0.7733	3.757	1108	1.792318274	0.004140255	41.78020999	0.096512285
19.59895165	×ÔÉí³µÁ¾	Road 1	297.3287239	78.98405685	-0.001073846	0.562092841	0.349019617	0	318.1214	985.6084	650.3513	0.7733	3.757	1109	2.303201519	0.005320396	41.81872142	0.096601246
19.61563912	×ÔÉí³µÁ¾	Road 1	297.6949479	79.00577545	-0.001073846	0.564881563	0.356862754	0	318.429	985.6152	650.3356	0.7721	3.7583	1110	1.802981267	0.004164887	41.84880861	0.096670748
19.632298	×ÔÉí³µÁ¾	Road 1	298.0606465	79.02781677	-0.001073846	0.567560017	0.36470589	0	318.7366	985.6211	650.3199	0.7718	3.7586	1111	1.81815282	0.004199933	41.87909699	0.096740714
19.64896274	×ÔÉí³µÁ¾	Road 1	298.4266349	79.06264343	-0.001073846	0.573495567	0.380392164	0	319.2202	985.6299	650.2952	0.7718	3.7586	1112	2.342516475	0.005411213	41.91813443	0.096830891
19.69907426	×ÔÉí³µÁ¾	Road 1	299.5281223	79.13058701	-0.001070968	0.585434258	0.380392164	0	320.144	985.6484	650.2481	0.77	3.7603	1113	1.842250859	0.004255599	42.01045243	0.097044145
19.71577566	×ÔÉí³µÁ¾	Road 1	299.8954293	79.17333069	-0.001070968	0.590390444	0.388235301	0	320.7163	985.6592	650.2189	0.7697	3.7607	1114	2.66642031	0.006159431	42.05498537	0.097147016
19.73225712	×ÔÉí³µÁ¾	Road 1	300.2580057	79.19655304	-0.001070968	0.593386889	0.419607848	0	321.0246	985.666	650.2031	0.7684	3.7619	1115	1.88017073	0.004343194	42.08597334	0.097218598
19.74889767	×ÔÉí³µÁ¾	Road 1	300.6241899	79.21991959	-0.001070968	0.600009382	0.435294122	0	321.3329	985.6719	650.1874	0.7682	3.7622	1116	1.877347117	0.004336672	42.11721343	0.097290763
19.76568448	×ÔÉí³µÁ¾	Road 1	300.9937682	79.25758896	-0.001070968	0.613296688	0.443137258	0	321.8177	985.6807	650.1627	0.7682	3.7612	1117	2.453083865	0.005666624	42.15839287	0.097385888
19.78306291	×ÔÉí³µÁ¾	Road 1	301.3764907	79.282267	-0.001070968	0.620070279	0.450980395	0	322.1263	985.6875	650.147	0.7669	3.7624	1118	1.889435628	0.004364596	42.19122829	0.097461737
19.79895495	×ÔÉí³µÁ¾	Road 1	301.7265878	79.30696564	-0.001070968	0.625825763	0.458823532	0	322.4351	985.6934	650.1312	0.7666	3.7627	1119	1.981833023	0.004578034	42.22272366	0.097534492
19.81554271	×ÔÉí³µÁ¾	Road 1	302.0921354	79.33384781	-0.001070968	0.632189512	0.466666669	0	322.7659	985.7002	650.1143	0.7658	3.7635	1120	2.027939633	0.004684541	42.25636265	0.097612198
19.83226281	×ÔÉí³µÁ¾	Road 1	302.4607853	79.37394104	-0.001070968	0.642848849	0.466666669	0	323.2514	985.709	650.0895	0.7658	3.7634	1121	2.561776306	0.005917703	42.29919579	0.097711142
19.84926991	×ÔÉí³µÁ¾	Road 1	302.8358683	79.39616776	-0.001070968	0.647932947	0.466666669	0	323.5163	985.7148	650.076	0.7647	3.7645	1122	1.814121425	0.00419062	42.33004874	0.097782413
19.86560255	×ÔÉí³µÁ¾	Road 1	303.1962632	79.43732529	-0.001070968	0.655308485	0.466666669	0	324.0022	985.7246	650.0513	0.7637	3.7654	1123	2.64733557	0.006115345	42.37328673	0.097882292
19.9179805	×ÔÉí³µÁ¾	Road 1	304.353363	79.52888947	-0.001070968	0.666965842	0.466666669	0	325.0631	985.7451	649.9971	0.7624	3.7667	1124	2.119342427	0.004895681	42.48429352	0.098138718
19.93380986	×ÔÉí³µÁ¾	Road 1	304.7032343	79.56964188	-0.001070968	0.670464277	0.466666669	0	325.5277	985.7549	649.9734	0.761	3.768	1125	2.688735852	0.00621098	42.52685449	0.098237034
19.94888558	×ÔÉí³µÁ¾	Road 1	305.0365624	79.59692917	-0.001070968	0.670983911	0.450980395	0	325.8375	985.7607	649.9575	0.7607	3.7682	1126	2.16393782	0.004998696	42.55947741	0.098312393
19.96564123	×ÔÉí³µÁ¾	Road 1	305.4071602	79.62403107	-0.001070968	0.671075046	0.443137258	0	326.1475	985.7666	649.9417	0.7605	3.7684	1127	2.032109868	0.004694174	42.59352673	0.098391047
19.98223889	×ÔÉí³µÁ¾	Road 1	305.7743985	79.65324097	-0.001070968	0.669448376	0.443137258	0	326.4797	985.7734	649.9248	0.7596	3.7692	1128	2.130736676	0.004922002	42.62889198	0.09847274
19.99937099	×ÔÉí³µÁ¾	Road 1	306.1536547	79.69380798	-0.001070968	0.669509649	0.435294122	0	326.9449	985.7832	649.9011	0.7583	3.7696	1129	2.550223155	0.005891015	42.67258266	0.098573666
20.03475465	×ÔÉí³µÁ¾	Road 1	306.937651	79.76524658	-0.001070968	0.665326297	0.427450985	0	327.7653	985.7988	649.8592	0.7575	3.7703	1130	2.311509078	0.005339586	42.75437232	0.0987626
20.06717141	×ÔÉí³µÁ¾	Road 1	307.6564597	79.8263443	-0.001070968	0.658616304	0.411764711	0	328.4754	985.8135	649.823	0.7557	3.7721	1131	2.220587409	0.005129557	42.82635657	0.098928884
20.1156602	×ÔÉí³µÁ¾	Road 1	308.7328862	79.91818314	-0.00107001	0.645753026	0.396078438	0	329.5638	985.835	649.7675	0.7538	3.7738	1132	2.228942654	0.005148858	42.93443528	0.099178546
20.13228792	×ÔÉí³µÁ¾	Road 1	309.1021324	79.94399414	-0.00107001	0.642618597	0.388235301	0	329.8749	985.8418	649.7516	0.7526	3.7749	1133	1.994048715	0.004606253	42.96759177	0.099255137
20.148927	×ÔÉí³µÁ¾	Road 1	309.4717497	79.96968155	-0.00107001	0.639921248	0.380392164	0	330.1862	985.8477	649.7357	0.7524	3.7751	1134	1.988728736	0.004593963	43.00068239	0.099331576
20.16567788	×ÔÉí³µÁ¾	Road 1	309.8440367	80.00971298	-0.00107001	0.634149492	0.380392164	0	330.6756	985.8574	649.7107	0.7515	3.776	1135	2.574299538	0.005946632	43.04380418	0.099431188
20.18222093	×ÔÉí³µÁ¾	Road 1	310.2118212	80.03509827	-0.00107001	0.629276574	0.372549027	0	330.9872	985.8643	649.6948	0.7503	3.7772	1136	1.983680424	0.004582302	43.0766203	0.099506993
20.19894798	×ÔÉí³µÁ¾	Road 1	310.5838124	80.06000977	-0.00107001	0.626340806	0.36470589	0	331.2988	985.8701	649.679	0.75	3.7774	1137	1.952936104	0.004511282	43.10928717	0.099582453
20.21563032	×ÔÉí³µÁ¾	Road 1	310.954932	80.08652115	-0.00107001	0.623014688	0.356862754	0	331.6328	985.877	649.6619	0.7492	3.7782	1138	2.022599803	0.004672206	43.14302886	0.099660397
20.23226464	×ÔÉí³µÁ¾	Road 1	311.3251616	80.12511063	-0.00107001	0.615933836	0.356862754	0	332.1229	985.8867	649.6368	0.7484	3.778	1139	2.529178387	0.005842402	43.18510002	0.099757581
20.24899463	×ÔÉí³µÁ¾	Road 1	311.6976414	80.15112076	-0.00107001	0.611920178	0.34117648	0	332.4572	985.8936	649.6199	0.7476	3.7788	1140	2.000108332	0.00462025	43.21856181	0.099834878
20.26562528	×ÔÉí³µÁ¾	Road 1	312.0680212	80.17527695	-0.00107001	0.607286155	0.34117648	0	332.7692	985.9004	649.6039	0.7464	3.78	1141	1.929838489	0.004457927	43.25065628	0.099909016
20.28233364	×ÔÉí³µÁ¾	Road 1	312.4403129	80.21433334	-0.001069052	0.600604236	0.34117648	0	333.2822	985.9111	649.5778	0.745	3.7814	1142	2.543898685	0.005876406	43.29316066	0.100007201
20.29890271	×ÔÉí³µÁ¾	Road 1	312.8095548	80.22602692	-0.001069052	0.599056482	0.333333343	0	333.4383	985.9141	649.5698	0.7449	3.7815	1143	1.413246983	0.003264601	43.31657685	0.100061293
20.31555646	×ÔÉí³µÁ¾	Road 1	313.180846	80.2611351	-0.001069052	0.594153881	0.333333343	0	333.9069	985.9238	649.5459	0.7437	3.7827	1144	2.386160367	0.00551203	43.35631536	0.100153088
20.33224283	×ÔÉí³µÁ¾	Road 1	313.5530336	80.29760284	-0.001069052	0.588151336	0.333333343	0	334.398	985.9336	649.5208	0.7428	3.7836	1145	2.44076316	0.005638163	43.39704284	0.100247169
20.34898968	×ÔÉí³µÁ¾	Road 1	313.9266766	80.32046127	-0.001069052	0.587432563	0.333333343	0	334.7107	985.9395	649.5049	0.7417	3.7838	1146	1.872021465	0.00432437	43.4283933	0.100319589
20.36561593	×ÔÉí³µÁ¾	Road 1	314.2977348	80.3433815	-0.001069052	0.583598912	0.333333343	0	335.0234	985.9463	649.4889	0.7405	3.7849	1147	1.881923259	0.004347243	43.45968263	0.100391867
20.38228654	×ÔÉí³µÁ¾	Road 1	314.669895	80.36759949	-0.001069052	0.581551373	0.333333343	0	335.3586	985.9531	649.4718	0.7398	3.7857	1148	1.933904859	0.00446732	43.491922	0.10046634
20.39891133	×ÔÉí³µÁ¾	Road 1	315.0411443	80.39184494	-0.001069052	0.579734325	0.333333343	0	335.6939	985.96	649.4547	0.739	3.7864	1149	1.93832652	0.004477534	43.52414627	0.100540778
20.41556324	×ÔÉí³µÁ¾	Road 1	315.4131553	80.4255867	-0.001065228	0.576969385	0.333333343	0	336.1635	985.9697	649.4308	0.7378	3.7877	1150	2.333587782	0.005390588	43.56300497	0.100630541
20.43222358	×ÔÉí³µÁ¾	Road 1	315.7854589	80.44808807	-0.001064273	0.575791597	0.333333343	0	336.4766	985.9766	649.4148	0.7366	3.7889	1151	1.864550582	0.004307112	43.59406902	0.100702299
20.44895284	×ÔÉí³µÁ¾	Road 1	316.1594653	80.48314133	-0.001062366	0.574354053	0.34117648	0	336.9689	985.9863	649.3896	0.7358	3.7888	1152	2.383031996	0.005504804	43.63393537	0.100794391
20.46558056	×ÔÉí³µÁ¾	Road 1	316.5313042	80.50531998	-0.001061413	0.574054956	0.34117648	0	337.2823	985.9932	649.3737	0.7347	3.7899	1153	1.854007624	0.004282758	43.66476329	0.100865603
20.48231422	×ÔÉí³µÁ¾	Road 1	316.9056159	80.52766342	-0.001056657	0.573676348	0.34117648	0	337.5958	985.999	649.3577	0.7345	3.7901	1154	1.855414998	0.004286009	43.69581117	0.100937324
20.49895403	×ÔÉí³µÁ¾	Road 1	317.2779388	80.55151749	-0.001050968	0.572738886	0.34117648	0	337.9317	986.0059	649.3406	0.7338	3.7909	1155	1.924295272	0.004445122	43.72783109	0.10101129
20.51565396	×ÔÉí³µÁ¾	Road 1	317.6517907	80.5911644	-0.001046243	0.572989881	0.34117648	0	338.4918	986.0176	649.312	0.7322	3.7925	1156	2.579878892	0.00595952	43.77091489	0.101110813
20.53225236	×ÔÉí³µÁ¾	Road 1	318.0234716	80.61328125	-0.001040592	0.57273972	0.34117648	0	338.8056	986.0244	649.296	0.7311	3.7937	1157	1.855140196	0.004285374	43.80170724	0.101181944
20.54891344	×ÔÉí³µÁ¾	Road 1	318.3966592	80.6355629	-0.001033089	0.571972132	0.34117648	0	339.1195	986.0313	649.28	0.73	3.7948	1158	1.858967958	0.004294216	43.83267965	0.10125349
20.56558551	×ÔÉí³µÁ¾	Road 1	318.770247	80.66879654	-0.001024691	0.571404219	0.34117648	0	339.5905	986.041	649.2559	0.7287	3.7961	1159	2.316792518	0.005351791	43.87130538	0.101342715
20.5822136	×ÔÉí³µÁ¾	Road 1	319.1429514	80.69093399	-0.001017265	0.571705401	0.34117648	0	339.9046	986.0469	649.2399	0.7286	3.7963	1160	1.855843087	0.004286998	43.9021645	0.101414
20.59896045	×ÔÉí³µÁ¾	Road 1	319.5184717	80.7240303	-0.001009874	0.571205318	0.34117648	0	340.3759	986.0566	649.2158	0.7274	3.7975	1161	2.306247301	0.005327431	43.94078688	0.101503218
20.61561566	×ÔÉí³µÁ¾	Road 1	319.89204	80.74623642	-0.000999771	0.571047246	0.34117648	0	340.6902	986.0635	649.1998	0.7263	3.7987	1162	1.858272746	0.00429261	43.97173681	0.101574712
20.63218949	×ÔÉí³µÁ¾	Road 1	320.2638843	80.76825027	-0.000991555	0.57117039	0.34117648	0	341.0046	986.0703	649.1838	0.7251	3.7998	1163	1.855171522	0.004285446	44.00248412	0.101645738
20.64970575	×ÔÉí³µÁ¾	Road 1	320.657034	80.80145645	-0.000980671	0.570373237	0.34117648	0	341.4764	986.0801	649.1597	0.7239	3.8011	1164	2.251945724	0.005201995	44.04192977	0.101736858
20.66551201	×ÔÉí³µÁ¾	Road 1	321.0119003	80.82354584	-0.00097256	0.57115227	0.34117648	0	341.791	986.0869	649.1437	0.7228	3.8022	1165	1.904618728	0.004399669	44.07203468	0.1018064
20.68218262	×ÔÉí³µÁ¾	Road 1	321.3862736	80.84552536	-0.000962707	0.570025742	0.34117648	0	342.1057	986.0928	649.1277	0.7227	3.8014	1166	1.849834962	0.004273119	44.10287255	0.101877636
20.69896393	×ÔÉí³µÁ¾	Road 1	321.7632875	80.87869034	-0.000955584	0.569637358	0.34117648	0	342.5779	986.1025	649.1036	0.7214	3.8026	1167	2.310114766	0.005336365	44.1416393	0.101967187
20.71558688	×ÔÉí³µÁ¾	Road 1	322.1368457	80.90073853	-0.000950264	0.569557488	0.34117648	0	342.8928	986.1094	649.0875	0.7203	3.8038	1168	1.856422765	0.004288337	44.17249853	0.102038472
20.73225896	×ÔÉí³µÁ¾	Road 1	322.5116097	80.92277298	-0.000946729	0.569857061	0.34117648	0	343.2078	986.1162	649.0714	0.7192	3.8049	1169	1.853538421	0.004281674	44.20340086	0.102109856
20.74894533	×ÔÉí³µÁ¾	Road 1	322.8868555	80.95740738	-0.000944965	0.56889075	0.34117648	0	343.703	986.127	649.0462	0.7174	3.8067	1170	2.381521306	0.005501314	44.2431398	0.102201653
20.76552613	×ÔÉí³µÁ¾	Road 1	323.2598287	80.97939377	-0.000944083	0.569630086	0.349019617	0	344.0182	986.1328	649.0301	0.7172	3.8069	1171	1.857688055	0.004291259	44.27394176	0.102272805
20.78224109	×ÔÉí³µÁ¾	Road 1	323.6359219	81.00142822	-0.000940563	0.57039988	0.349019617	0	344.3335	986.1396	649.014	0.7161	3.808	1172	1.852675098	0.004279679	44.30490915	0.10234434
20.79887797	×ÔÉí³µÁ¾	Road 1	324.0104187	81.03612442	-0.000939685	0.571120918	0.349019617	0	344.8292	986.1504	648.9888	0.7143	3.8098	1173	2.390468359	0.005521982	44.34467909	0.102436209
20.81558927	×ÔÉí³µÁ¾	Road 1	324.3866932	81.05823441	-0.000936176	0.571900189	0.349019617	0	345.1447	986.1572	648.9727	0.7132	3.811	1174	1.857131843	0.004289975	44.37571417	0.1025079
20.83218876	×ÔÉí³µÁ¾	Road 1	324.7605524	81.08036499	-0.000932676	0.571401417	0.356862754	0	345.4603	986.1641	648.9565	0.7121	3.8121	1175	1.864669306	0.004307386	44.40666674	0.1025794
20.84896274	×ÔÉí³µÁ¾	Road 1	325.1385041	81.11529465	-0.000926571	0.572571516	0.356862754	0	345.9565	986.1738	648.9312	0.7113	3.8128	1176	2.390317624	0.005521634	44.44676187	0.10267202
20.86552191	×ÔÉí³µÁ¾	Road 1	325.5117176	81.13741837	-0.000917897	0.574640393	0.356862754	0	346.2723	986.1807	648.9152	0.7102	3.8139	1177	1.867755696	0.004314516	44.47769036	0.102743465
20.88218116	×ÔÉí³µÁ¾	Road 1	325.8872897	81.15972061	-0.000910136	0.575808465	0.356862754	0	346.5882	986.1875	648.899	0.709	3.815	1178	1.870072807	0.004319868	44.50884436	0.10281543
20.89887742	×ÔÉí³µÁ¾	Road 1	326.2638295	81.18840866	-0.000900711	0.57490015	0.36470589	0	346.9268	986.1943	648.8817	0.7083	3.8156	1179	2.13681208	0.004936036	44.54452114	0.102897844
20.91590505	×ÔÉí³µÁ¾	Road 1	326.6479784	81.21717224	-0.000889656	0.577299416	0.36470589	0	347.4009	986.2051	648.8576	0.7062	3.8177	1180	2.117110185	0.004890525	44.58057052	0.102981118
20.932219	×ÔÉí³µÁ¾	Road 1	327.016179	81.25084534	-0.000876174	0.57895422	0.36470589	0	347.8753	986.2148	648.8334	0.705	3.8178	1181	2.38097268	0.005500047	44.61941358	0.103070845
20.94887275	×ÔÉí³µÁ¾	Road 1	327.392153	81.27340164	-0.000858687	0.580541193	0.36470589	0	348.1917	986.2217	648.8172	0.7039	3.8189	1182	1.883294433	0.00435041	44.65077749	0.103143296
20.96558551	×ÔÉí³µÁ¾	Road 1	327.7696016	81.30403976	-0.000842251	0.58088994	0.36470589	0	348.6212	986.2305	648.7953	0.7029	3.8199	1183	2.220190946	0.005128641	44.68788301	0.10322901
20.99888457	×ÔÉí³µÁ¾	Road 1	328.522121	81.35574417	-0.00082522	0.581989706	0.36470589	0	349.3449	986.2461	648.7584	0.7003	3.8223	1184	2.024103693	0.00467568	44.75528376	0.103384705
21.01555041	×ÔÉí³µÁ¾	Road 1	328.8988544	81.37843094	-0.000802871	0.583569229	0.372549027	0	349.6617	986.2529	648.7423	0.6992	3.8233	1185	1.890153195	0.004366254	44.78678476	0.103457473
21.03224448	×ÔÉí³µÁ¾	Road 1	329.2763311	81.40113831	-0.000764738	0.583531022	0.372549027	0	349.9785	986.2598	648.7261	0.6981	3.8244	1186	1.889845913	0.004365544	44.81833397	0.103530351
21.04884141	×ÔÉí³µÁ¾	Road 1	329.6517765	81.43697433	-0.000742749	0.586390078	0.372549027	0	350.4766	986.2705	648.7007	0.6964	3.8261	1187	2.452655598	0.005665634	44.85904052	0.103624384
21.06551348	×ÔÉí³µÁ¾	Road 1	330.0290278	81.4598465	-0.000724873	0.586750984	0.380392164	0	350.7937	986.2773	648.6846	0.6953	3.8271	1188	1.899212114	0.00438718	44.89070433	0.103697527
21.08222111	×ÔÉí³µÁ¾	Road 1	330.4072437	81.49434357	-0.000708014	0.588509142	0.380392164	0	351.2695	986.2871	648.6603	0.6942	3.8282	1189	2.38768264	0.005515547	44.93059684	0.103789679
21.09893607	×ÔÉí³µÁ¾	Road 1	330.785732	81.51725693	-0.000695003	0.589977205	0.380392164	0	351.5868	986.2939	648.644	0.6932	3.8292	1190	1.899595799	0.004388066	44.96234851	0.103863025
21.1155242	×ÔÉí³µÁ¾	Road 1	331.1614553	81.54045868	-0.000684995	0.592188001	0.380392164	0	351.9042	986.3008	648.6279	0.6921	3.8303	1191	1.919683242	0.004434468	44.99419247	0.103936585
21.13216622	×ÔÉí³µÁ¾	Road 1	331.5385595	81.57517548	-0.000677199	0.592096388	0.380392164	0	352.3805	986.3105	648.6036	0.691	3.8314	1192	2.404795175	0.005555077	45.03421311	0.104029032
21.14886285	×ÔÉí³µÁ¾	Road 1	331.9170085	81.5982605	-0.000671566	0.593903184	0.380392164	0	352.6981	986.3174	648.5874	0.69	3.8325	1193	1.909494358	0.004410932	45.06609523	0.10410268
21.16558624	×ÔÉí³µÁ¾	Road 1	332.2961718	81.62148972	-0.000668062	0.593865871	0.380392164	0	353.0158	986.3242	648.5712	0.689	3.8336	1194	1.914472581	0.004422432	45.09811171	0.104176638
21.18218867	×ÔÉí³µÁ¾	Road 1	332.6727458	81.65470276	-0.000668062	0.594805121	0.380392164	0	353.3336	986.3311	648.5549	0.6879	3.8347	1195	2.346468895	0.005420343	45.13706879	0.104266629
21.19885634	×ÔÉí³µÁ¾	Road 1	333.0509153	81.67966919	-0.000668062	0.595355332	0.380392164	0	353.8105	986.3418	648.5306	0.6859	3.8368	1196	1.992449559	0.004602558	45.17027829	0.104343343
21.21553318	×ÔÉí³µÁ¾	Road 1	333.4294007	81.70297394	-0.000668062	0.595665276	0.380392164	0	354.1285	986.3486	648.5144	0.6848	3.8369	1197	1.922018796	0.004439863	45.20233149	0.104417386
21.23224191	×ÔÉí³µÁ¾	Road 1	333.8087804	81.73973694	-0.000668062	0.596126139	0.380392164	0	354.6285	986.3594	648.489	0.6832	3.8386	1198	2.489628646	0.005751042	45.24393002	0.104513478
21.24898583	×ÔÉí³µÁ¾	Road 1	334.1890678	81.76308975	-0.000668062	0.596047699	0.380392164	0	354.9467	986.3662	648.4727	0.6822	3.8397	1199	1.921284886	0.004438168	45.27609985	0.104587791
21.26557873	×ÔÉí³µÁ¾	Road 1	334.56604	81.78801498	-0.000668062	0.59661752	0.380392164	0	355.2878	986.373	648.4553	0.6816	3.8403	1200	1.997710873	0.004614712	45.30924767	0.104664362
21.28224237	×ÔÉí³µÁ¾	Road 1	334.9447823	81.8231781	-0.000668062	0.59666872	0.380392164	0	355.7656	986.3838	648.431	0.6795	3.8424	1201	2.428212291	0.00560917	45.34971053	0.104757831
21.29886129	×ÔÉí³µÁ¾	Road 1	335.3226315	81.84988861	-0.000668062	0.597405434	0.380392164	0	356.1297	986.3916	648.4124	0.6784	3.8436	1202	2.073293759	0.004789309	45.38416644	0.104837424
21.31562464	×ÔÉí³µÁ¾	Road 1	335.7038727	81.87317963	-0.000668062	0.597125292	0.380392164	0	356.4484	986.3984	648.3961	0.6774	3.8447	1203	1.919716942	0.004434546	45.41634732	0.104911762
21.33226446	×ÔÉí³µÁ¾	Road 1	336.0824203	81.89822845	-0.000668062	0.597425282	0.380392164	0	356.7899	986.4053	648.3787	0.6767	3.8454	1204	2.002256942	0.004625214	45.4496645	0.104988725
21.34889951	×ÔÉí³µÁ¾	Road 1	336.4610222	81.93341904	-0.000668062	0.597066343	0.380392164	0	357.2683	986.416	648.3543	0.6747	3.8475	1205	2.434816145	0.005624425	45.49016779	0.105082288
21.36552759	×ÔÉí³µÁ¾	Road 1	336.8395732	81.95672379	-0.000668062	0.598045468	0.380392164	0	357.5873	986.4229	648.338	0.6737	3.8485	1206	1.929958294	0.004458204	45.52225931	0.105156419
21.38219344	×ÔÉí³µÁ¾	Road 1	337.2190997	81.98180008	-0.000668062	0.59792608	0.380392164	0	357.9292	986.4307	648.3206	0.6721	3.8501	1207	2.003496163	0.004628076	45.55564926	0.10523355
21.39885268	×ÔÉí³µÁ¾	Road 1	337.5986461	82.01854248	-0.000668062	0.596937656	0.380392164	0	358.4308	986.4414	648.295	0.6704	3.8518	1208	2.500853799	0.005776972	45.59731159	0.10532979
21.41556104	×ÔÉí³µÁ¾	Road 1	337.9794201	82.04192963	-0.000668062	0.597667933	0.380392164	0	358.7502	986.4482	648.2788	0.6694	3.8529	1209	1.93037495	0.004459166	45.629565	0.105404295
21.43226097	×ÔÉí³µÁ¾	Road 1	338.3601646	82.07700348	-0.000668062	0.597128272	0.380392164	0	359.2294	986.458	648.2543	0.6683	3.8539	1210	2.427773743	0.005608157	45.67010865	0.105497951
21.44883628	×ÔÉí³µÁ¾	Road 1	338.7381754	82.10039063	-0.000668062	0.598266006	0.380392164	0	359.549	986.4658	648.238	0.6663	3.856	1211	1.939508046	0.004480264	45.70225658	0.105572213
21.46549992	×ÔÉí³µÁ¾	Road 1	339.1183092	82.1237915	-0.000668062	0.596927762	0.380392164	0	359.8686	986.4727	648.2217	0.6653	3.857	1212	1.935252205	0.004470433	45.73450494	0.105646706
21.48217419	×ÔÉí³µÁ¾	Road 1	339.4987936	82.14714432	-0.000668062	0.596829474	0.380392164	0	360.1884	986.4795	648.2054	0.6642	3.8581	1213	1.933035963	0.004465313	45.7667369	0.105721162
21.49885579	×ÔÉí³µÁ¾	Road 1	339.8796233	82.18555527	-0.000668062	0.597088456	0.380392164	0	360.7139	986.4902	648.1786	0.663	3.8593	1214	2.574245458	0.005946507	45.80967945	0.10582036
21.51563674	×ÔÉí³µÁ¾	Road 1	340.2628296	82.20890808	-0.000668062	0.59699893	0.380392164	0	361.0339	986.498	648.1622	0.6609	3.8613	1215	1.927940072	0.004453542	45.8420321	0.105895094
21.53224393	×ÔÉí³µÁ¾	Road 1	340.642177	82.23248062	-0.000668062	0.596829414	0.380392164	0	361.354	986.5049	648.146	0.6599	3.8624	1216	1.948151945	0.004500231	45.87438543	0.10596983
21.54884086	×ÔÉí³µÁ¾	Road 1	341.0214044	82.25729599	-0.000668062	0.596779644	0.380392164	0	361.6971	986.5117	648.1285	0.6583	3.863	1217	2.002489348	0.00462575	45.9076206	0.106046604
21.56549937	×ÔÉí³µÁ¾	Road 1	341.4021777	82.28730927	-0.000668062	0.597500682	0.380392164	0	362.1089	986.5205	648.1074	0.6569	3.8643	1218	2.220996946	0.005130503	45.94461911	0.10613207
21.58229387	×ÔÉí³µÁ¾	Road 1	341.7862155	82.3207489	-0.000668062	0.596311748	0.380392164	0	362.4521	986.5283	648.09	0.6553	3.8659	1219	2.356485248	0.005443481	45.98419511	0.106223491
21.598893	×ÔÉí³µÁ¾	Road 1	342.1659081	82.34730148	-0.000668062	0.596392632	0.380392164	0	362.9329	986.5391	648.0654	0.6533	3.8679	1220	2.078666565	0.00480172	46.01869916	0.106303195
21.61552072	×ÔÉí³µÁ¾	Road 1	342.5463625	82.3706337	-0.000668062	0.5962919	0.380392164	0	363.2535	986.5459	648.0491	0.6522	3.8689	1221	1.939388352	0.004479987	46.05094677	0.106377687
21.63224558	×ÔÉí³µÁ¾	Road 1	342.9291561	82.39572372	-0.000668062	0.595934689	0.380392164	0	363.5972	986.5537	648.0316	0.6506	3.8695	1222	2.00890239	0.004640565	46.08454537	0.1064553
21.64890519	×ÔÉí³µÁ¾	Road 1	343.3105867	82.42391739	-0.000668062	0.596064925	0.380392164	0	363.9868	986.5615	648.0117	0.6499	3.8703	1223	2.146329174	0.00495802	46.12030238	0.106537898
21.66557433	×ÔÉí³µÁ¾	Road 1	343.6924051	82.46052933	-0.000668062	0.595484614	0.380392164	0	364.4911	986.5732	647.986	0.6472	3.8728	1224	2.506207901	0.00578934	46.16207871	0.106634402
21.68218885	×ÔÉí³µÁ¾	Road 1	344.0730804	82.48391647	-0.000668062	0.595984459	0.380392164	0	364.8122	986.5801	647.9696	0.6462	3.8738	1225	1.944793594	0.004492473	46.19439053	0.106709042
21.69884407	×ÔÉí³µÁ¾	Road 1	344.4548029	82.50877304	-0.000668062	0.595274746	0.380392164	0	365.1563	986.5879	647.952	0.6446	3.8754	1226	2.005727781	0.004633231	46.22779635	0.10678621
21.71556379	×ÔÉí³µÁ¾	Road 1	344.8381821	82.54710846	-0.000668062	0.595685601	0.380392164	0	365.6841	986.5986	647.9252	0.6434	3.8765	1227	2.577286588	0.005953532	46.27088788	0.106885751
21.73219188	×ÔÉí³µÁ¾	Road 1	345.2195363	82.56362228	-0.000668062	0.594826043	0.380392164	0	365.8677	986.6035	647.9158	0.6418	3.8781	1228	1.650700426	0.003813118	46.29833587	0.106949156
21.74888888	×ÔÉí³µÁ¾	Road 1	345.6026173	82.59518738	-0.000668062	0.595317364	0.380392164	0	366.35	986.6133	647.8912	0.6408	3.8791	1229	2.291535866	0.005293448	46.33659764	0.107037541
21.76556278	×ÔÉí³µÁ¾	Road 1	345.9852844	82.62020187	-0.000671566	0.594997406	0.380392164	0	366.6945	986.6211	647.8737	0.6392	3.8806	1230	2.013597758	0.004651411	46.37017218	0.107115098
21.78217914	×ÔÉí³µÁ¾	Road 1	346.3667988	82.65662842	-0.000672268	0.595096707	0.380392164	0	367.2001	986.6318	647.8478	0.6376	3.8822	1231	2.508471728	0.00579457	46.41185384	0.107211382
21.79886221	×ÔÉí³µÁ¾	Road 1	346.7499532	82.6799675	-0.000672268	0.594738483	0.380392164	0	367.5219	986.6396	647.8314	0.6356	3.8842	1232	1.942513466	0.004487206	46.44426093	0.107286243
21.81553612	×ÔÉí³µÁ¾	Road 1	347.1330047	82.70318985	-0.000674378	0.594618142	0.380392164	0	367.8438	986.6465	647.815	0.6346	3.8851	1233	1.93852213	0.004477986	46.47658367	0.107360908
21.83221552	×ÔÉí³µÁ¾	Road 1	347.5162972	82.72797089	-0.000677199	0.594759762	0.380392164	0	368.1888	986.6543	647.7974	0.633	3.8867	1234	2.005475843	0.004632649	46.51003381	0.107438178
21.84883518	×ÔÉí³µÁ¾	Road 1	347.8984005	82.76776886	-0.000682153	0.594979227	0.380392164	0	368.7411	986.666	647.7693	0.6313	3.8884	1235	2.656163345	0.006135737	46.55417833	0.107540152
21.86559119	×ÔÉí³µÁ¾	Road 1	348.2837469	82.79097748	-0.000688558	0.594490886	0.380392164	0	369.0634	986.6729	647.7528	0.6303	3.8894	1236	1.934793037	0.004469372	46.58659775	0.107615041
21.8822497	×ÔÉí³µÁ¾	Road 1	348.6670123	82.8258728	-0.000695003	0.594489932	0.380392164	0	369.5469	986.6836	647.7281	0.6283	3.8913	1237	2.443259852	0.00564393	46.62729882	0.10770906
21.89891701	×ÔÉí³µÁ¾	Road 1	349.0505876	82.84906082	-0.000708014	0.593576849	0.380392164	0	369.8694	986.6904	647.7117	0.6272	3.8923	1238	1.940332671	0.004482168	46.65963894	0.107783766
21.91548865	×ÔÉí³µÁ¾	Road 1	349.4320673	82.87213898	-0.000724135	0.59454757	0.380392164	0	370.192	986.6982	647.6953	0.6253	3.8942	1239	1.941794396	0.004485545	46.69181765	0.107858099
21.93218565	×ÔÉí³µÁ¾	Road 1	349.8165945	82.90699997	-0.000740499	0.592880547	0.380392164	0	370.676	986.709	647.6706	0.6233	3.8962	1240	2.440427983	0.005637389	46.73256548	0.107952226
21.94889547	×ÔÉí³µÁ¾	Road 1	350.2015247	82.93015366	-0.000764738	0.593631625	0.380392164	0	370.9988	986.7158	647.6541	0.6224	3.8972	1241	1.937929459	0.004476617	46.76494795	0.10802703
21.96554116	×ÔÉí³µÁ¾	Road 1	350.5850838	82.95321808	-0.000789501	0.593359768	0.380392164	0	371.3217	986.7227	647.6376	0.6214	3.8981	1242	1.938369238	0.004477633	46.79721342	0.108101563
21.9821949	×ÔÉí³µÁ¾	Road 1	350.9689899	82.98803787	-0.00081001	0.592948616	0.380392164	0	371.8062	986.7334	647.613	0.6195	3.9001	1243	2.444635223	0.005647107	46.83792576	0.108195609
21.99888714	×ÔÉí³µÁ¾	Road 1	351.3538976	83.01272278	-0.000832491	0.593108058	0.380392164	0	372.1524	986.7412	647.5953	0.618	3.9016	1244	2.006397373	0.004634778	46.87141701	0.108272973
22.01551192	×ÔÉí³µÁ¾	Road 1	351.7373569	83.03585587	-0.000852911	0.593418062	0.380392164	0	372.4756	986.748	647.5788	0.617	3.9026	1245	1.944213983	0.004491134	46.90373916	0.108347637
22.032162	×ÔÉí³µÁ¾	Road 1	352.1215604	83.07063446	-0.000871989	0.592623293	0.380392164	0	372.9606	986.7588	647.5541	0.6151	3.9045	1246	2.445324827	0.0056487	46.94445401	0.108441689
22.04883408	×ÔÉí³µÁ¾	Road 1	352.5063857	83.09530563	-0.000890503	0.592975855	0.380392164	0	373.3072	986.7666	647.5364	0.6136	3.905	1247	2.008787728	0.0046403	46.97794467	0.108519052
22.06554244	×ÔÉí³µÁ¾	Road 1	352.8921563	83.11851425	-0.000903275	0.592394829	0.380392164	0	373.6307	986.7744	647.52	0.6116	3.907	1248	1.944098263	0.004490867	47.01042737	0.108594087
22.08221891	×ÔÉí³µÁ¾	Road 1	353.2773507	83.15305252	-0.000917897	0.592854321	0.380392164	0	374.1162	986.7852	647.4952	0.6097	3.9089	1249	2.434727023	0.005624219	47.05103002	0.108687879
22.09889282	×ÔÉí³µÁ¾	Road 1	353.6625468	83.16624985	-0.000929184	0.592424929	0.380392164	0	374.3012	986.7891	647.4857	0.6092	3.9095	1250	1.515667871	0.003501193	47.07630213	0.108746258
22.11547288	×ÔÉí³µÁ¾	Road 1	354.0457275	83.19932556	-0.000936176	0.592862964	0.380392164	0	374.7638	986.7988	647.4622	0.6078	3.9109	1251	2.381172792	0.005500509	47.11578213	0.108837457
22.13220067	×ÔÉí³µÁ¾	Road 1	354.4324901	83.23546371	-0.000939685	0.592103779	0.380392164	0	375.2729	986.8105	647.4362	0.6054	3.9134	1252	2.501041714	0.005777406	47.15761903	0.1089341
22.14891673	×ÔÉí³µÁ¾	Road 1	354.8190968	83.26029282	-0.000944083	0.59175545	0.380392164	0	375.6201	986.8184	647.4185	0.6039	3.9149	1253	2.016175394	0.004657365	47.19132154	0.109011953
22.16547114	×ÔÉí³µÁ¾	Road 1	355.2020708	83.28332977	-0.000944083	0.591660678	0.380392164	0	375.9443	986.8252	647.402	0.6029	3.9159	1254	1.949193534	0.004502637	47.22358929	0.109086491
22.18215605	×ÔÉí³µÁ¾	Road 1	355.5881701	83.30629807	-0.000944083	0.592634737	0.380392164	0	376.2686	986.833	647.3855	0.601	3.9178	1255	1.938851971	0.004478748	47.25593885	0.109161219
22.19883985	×ÔÉí³µÁ¾	Road 1	355.9743739	83.33434067	-0.000944083	0.591446102	0.380392164	0	376.6624	986.8418	647.3654	0.5994	3.9195	1256	2.158439744	0.004985996	47.29194983	0.109244404
22.21555811	×ÔÉí³µÁ¾	Road 1	356.3615125	83.36388016	-0.000944083	0.591126382	0.380392164	0	377.0797	986.8506	647.3441	0.5982	3.9208	1257	2.221085367	0.005130707	47.32908251	0.109330181
22.23214551	×ÔÉí³µÁ¾	Road 1	356.7457874	83.40003891	-0.000944083	0.591798127	0.380392164	0	377.5898	986.8623	647.3181	0.5957	3.9233	1258	2.519464708	0.005819963	47.37087388	0.109426719
22.24895247	×ÔÉí³µÁ¾	Road 1	357.1352641	83.42470322	-0.000944083	0.590878308	0.380392164	0	377.9377	986.8701	647.3003	0.5943	3.9248	1259	2.006706333	0.004635492	47.40460052	0.109504627
22.26548709	×ÔÉí³µÁ¾	Road 1	357.5185351	83.44769897	-0.000944083	0.591188729	0.380392164	0	378.2625	986.877	647.2838	0.5933	3.9257	1260	1.951853514	0.004508782	47.43687367	0.109579178
22.28214707	×ÔÉí³µÁ¾	Road 1	357.9048721	83.48230591	-0.000944083	0.591250062	0.380392164	0	378.7499	986.8877	647.2589	0.5915	3.9277	1261	2.447632263	0.005654031	47.47765117	0.109673374
22.29964169	×ÔÉí³µÁ¾	Road 1	358.3106754	83.50518494	-0.000944083	0.590940654	0.380392164	0	379.0749	986.8955	647.2423	0.5896	3.9296	1262	1.893110761	0.004373086	47.51077043	0.10974988
22.31546812	×ÔÉí³µÁ¾	Road 1	358.6778923	83.52993851	-0.000944083	0.590585649	0.380392164	0	379.4233	986.9033	647.2246	0.5881	3.9311	1263	2.078552064	0.004801455	47.54366648	0.10982587
22.33222047	×ÔÉí³µÁ¾	Road 1	359.0667533	83.56437378	-0.000944083	0.590086877	0.380392164	0	379.9111	986.9141	647.1997	0.5862	3.9331	1264	2.434077019	0.005622718	47.58444299	0.109920063
22.34889731	×ÔÉí³µÁ¾	Road 1	359.4539675	83.58725967	-0.000944083	0.590577543	0.380392164	0	380.2365	986.9219	647.1832	0.5843	3.934	1265	1.941292384	0.004484385	47.61681761	0.109994849
22.36556755	×ÔÉí³µÁ¾	Road 1	359.8411357	83.61039963	-0.000944083	0.589599311	0.380392164	0	380.562	986.9287	647.1665	0.5834	3.935	1266	1.953148158	0.004511772	47.64937706	0.110070061
22.38212855	×ÔÉí³µÁ¾	Road 1	360.2259319	83.64626999	-0.000944083	0.590348363	0.380392164	0	381.0735	986.9404	647.1405	0.5809	3.9374	1267	2.515946616	0.005811837	47.69104367	0.110166311
22.39887284	×ÔÉí³µÁ¾	Road 1	360.6151013	83.67092743	-0.000944083	0.589571059	0.380392164	0	381.4225	986.9482	647.1227	0.5795	3.9389	1268	2.015419299	0.004655619	47.72479043	0.110244266
22.41547967	×ÔÉí³µÁ¾	Road 1	361.0011813	83.69377899	-0.000944083	0.59012115	0.380392164	0	381.7483	986.9561	647.1061	0.5776	3.9409	1269	1.946073233	0.004495429	47.75710853	0.110318921
22.43221259	×ÔÉí³µÁ¾	Road 1	361.3902998	83.71679535	-0.000944083	0.588943958	0.380392164	0	382.0741	986.9629	647.0895	0.5767	3.9418	1270	1.946148147	0.004495602	47.78967327	0.110394145
22.44883041	×ÔÉí³µÁ¾	Road 1	361.7768702	83.74461823	-0.000944083	0.589223802	0.380392164	0	382.4699	986.9717	647.0693	0.5751	3.9434	1271	2.162853305	0.004996191	47.82561518	0.110477171
22.46548856	×ÔÉí³µÁ¾	Road 1	362.1645676	83.78549423	-0.000944083	0.589045167	0.380392164	0	383.0522	986.9854	647.0396	0.572	3.9466	1272	2.727970834	0.006301613	47.87105812	0.110582144
22.48221268	×ÔÉí³µÁ¾	Road 1	362.5539147	83.81004181	-0.000944083	0.589375615	0.380392164	0	383.4018	986.9932	647.0217	0.5705	3.948	1273	2.014800686	0.00465419	47.90475389	0.110659981
22.49888292	×ÔÉí³µÁ¾	Road 1	362.9421128	83.83281097	-0.000944083	0.588629365	0.380392164	0	383.7281	987.001	647.0051	0.5686	3.9499	1274	1.941436162	0.004484718	47.9371181	0.110734743
22.51548901	×ÔÉí³µÁ¾	Road 1	363.328976	83.86724625	-0.000944083	0.589128435	0.388235301	0	384.2177	987.0117	646.9802	0.5668	3.9517	1275	2.454931596	0.005670892	47.97788492	0.110828914
22.55117142	×ÔÉí³µÁ¾	Road 1	364.1608182	83.92460861	-0.000944083	0.5910604	0.388235301	0	385.0342	987.0303	646.9385	0.563	3.9555	1276	2.118285915	0.00489324	48.05347047	0.111003517
22.56547884	×ÔÉí³µÁ¾	Road 1	364.4944494	83.94749451	-0.000944083	0.591597557	0.396078438	0	385.361	987.0381	646.9219	0.5612	3.9573	1277	2.113219202	0.004881536	48.08370518	0.111073359
22.58217364	×ÔÉí³µÁ¾	Road 1	364.883859	83.97073059	-0.000944083	0.591908038	0.396078438	0	385.6879	987.0449	646.9052	0.5603	3.9582	1278	1.962968963	0.004534458	48.11647655	0.111149061
22.59881896	×ÔÉí³µÁ¾	Road 1	365.2722205	83.99369888	-0.000944083	0.593759	0.396078438	0	386.0148	987.0527	646.8885	0.5584	3.9601	1279	1.954752234	0.004515478	48.14901402	0.111224222
22.61553832	×ÔÉí³µÁ¾	Road 1	365.6624171	84.01683884	-0.000944083	0.594967365	0.396078438	0	386.3418	987.0596	646.8719	0.5575	3.96	1280	1.958224459	0.004523499	48.18175428	0.111299852
22.63221002	×ÔÉí³µÁ¾	Road 1	366.0516704	84.05329285	-0.000944083	0.595696568	0.396078438	0	386.8559	987.0713	646.8456	0.5551	3.9624	1281	2.541705096	0.005871339	48.22412884	0.111397738
22.64882198	×ÔÉí³µÁ¾	Road 1	366.4396354	84.07641907	-0.000944083	0.596238971	0.396078438	0	387.1832	987.0791	646.829	0.5533	3.9643	1282	1.965300649	0.004539844	48.25677633	0.111473153
22.66549919	×ÔÉí³µÁ¾	Road 1	366.8292861	84.11138306	-0.000944083	0.59630847	0.396078438	0	387.6742	987.0908	646.804	0.5505	3.9671	1283	2.477814604	0.005723752	48.29809936	0.11156861
22.68220681	×ÔÉí³µÁ¾	Road 1	367.2197554	84.13457108	-0.000944083	0.597716928	0.396078438	0	388.0017	987.0977	646.7872	0.5496	3.968	1284	1.963345848	0.004535329	48.33090221	0.111644384
22.69886313	×ÔÉí³µÁ¾	Road 1	367.6091335	84.15797195	-0.000944083	0.598247051	0.396078438	0	388.3293	987.1055	646.7705	0.5477	3.9698	1285	1.976209876	0.004565045	48.36381858	0.111720421
22.71556049	×ÔÉí³µÁ¾	Road 1	367.9996024	84.18619995	-0.000944083	0.59836024	0.396078438	0	388.7272	987.1143	646.7503	0.5462	3.9714	1286	2.184521304	0.005046244	48.40029433	0.11180468
22.73219151	×ÔÉí³µÁ¾	Road 1	368.3886894	84.22294922	-0.000944083	0.598378837	0.396078438	0	389.2423	987.126	646.724	0.5438	3.9737	1287	2.563039573	0.005920621	48.44292029	0.111903146
22.74884526	×ÔÉí³µÁ¾	Road 1	368.7784166	84.2463913	-0.000944083	0.598489404	0.396078438	0	389.5703	987.1338	646.7073	0.5419	3.9756	1288	1.979929277	0.004573637	48.47589353	0.111979314
22.76549094	×ÔÉí³µÁ¾	Road 1	369.1680626	84.26962738	-0.000939685	0.598639846	0.396078438	0	389.8983	987.1416	646.6906	0.54	3.9774	1289	1.971879398	0.004555041	48.5087168	0.112055136
22.78215385	×ÔÉí³µÁ¾	Road 1	369.5582813	84.30625305	-0.000939685	0.598700941	0.396078438	0	390.4139	987.1533	646.6643	0.5377	3.9798	1290	2.556795999	0.005906199	48.55132046	0.11215355
22.79887101	×ÔÉí³µÁ¾	Road 1	369.9498793	84.32968826	-0.000939685	0.598375261	0.396078438	0	390.7421	987.1611	646.6475	0.5358	3.9816	1291	1.977400336	0.004567795	48.58437698	0.112229911
22.81550972	×ÔÉí³µÁ¾	Road 1	370.3397479	84.35306168	-0.000939685	0.599523067	0.396078438	0	391.0705	987.1689	646.6309	0.534	3.9835	1292	1.979975739	0.004573744	48.61732124	0.112306012
22.83215064	×ÔÉí³µÁ¾	Road 1	370.7298375	84.38975601	-0.000939685	0.598981619	0.396078438	0	391.5866	987.1807	646.6045	0.5316	3.9858	1293	2.564157733	0.005923204	48.65999117	0.11240458
22.84881172	×ÔÉí³µÁ¾	Road 1	371.1205085	84.41323929	-0.000939685	0.599447966	0.396078438	0	391.9152	987.1885	646.5878	0.5297	3.9877	1294	1.984608217	0.004584445	48.69305688	0.112480961
22.86551385	×ÔÉí³µÁ¾	Road 1	371.5122504	84.4365715	-0.000939685	0.598118782	0.396078438	0	392.2438	987.1953	646.571	0.5279	3.9876	1295	1.975948278	0.004564441	48.72605943	0.112557197
22.88223504	×ÔÉí³µÁ¾	Road 1	371.9045551	84.46149673	-0.000939685	0.599518061	0.396078438	0	392.5961	987.2041	646.553	0.5255	3.9899	1296	2.044799477	0.004723487	48.76025091	0.11263618
22.89882317	×ÔÉí³µÁ¾	Road 1	372.2938683	84.4897728	-0.000939685	0.599215984	0.396078438	0	392.9954	987.2129	646.5327	0.5239	3.9915	1297	2.201559655	0.005085603	48.79677067	0.11272054
22.91546299	×ÔÉí³µÁ¾	Road 1	372.6845264	84.51831665	-0.000937052	0.598161101	0.396078438	0	393.3949	987.2227	646.5123	0.5214	3.994	1298	2.210086368	0.0051053	48.83354611	0.112805492
22.93213103	×ÔÉí³µÁ¾	Road 1	373.0759779	84.54655838	-0.000936176	0.598507166	0.396078438	0	393.7709	987.2314	646.4932	0.5194	3.996	1299	2.195363426	0.00507129	48.87013851	0.11289002
22.94889841	×ÔÉí³µÁ¾	Road 1	373.4699177	84.57990875	-0.000932676	0.598140001	0.396078438	0	394.2647	987.2422	646.468	0.5177	3.9978	1300	2.411394268	0.005570321	48.91057127	0.11298342
22.96553492	×ÔÉí³µÁ¾	Road 1	373.8608908	84.6032341	-0.000928312	0.598480403	0.396078438	0	394.5941	987.25	646.4512	0.5158	3.9997	1301	1.982982576	0.00458069	48.9435612	0.113059626
22.98212269	×ÔÉí³µÁ¾	Road 1	374.2508872	84.63990784	-0.00092136	0.598747134	0.403921574	0	395.1117	987.2617	646.4248	0.5135	4.002	1302	2.575129304	0.005948549	48.98627684	0.113158299
22.99882409	×ÔÉí³µÁ¾	Road 1	374.6436635	84.66325378	-0.000914442	0.59949863	0.403921574	0	395.4413	987.2695	646.4081	0.5116	4.0039	1303	1.98109429	0.004576328	49.01936388	0.113234731
23.01550826	×ÔÉí³µÁ¾	Road 1	375.0361435	84.68674393	-0.000908418	0.5996117	0.403921574	0	395.7709	987.2773	646.3912	0.5098	4.0057	1304	1.988940464	0.004594452	49.0525477	0.113311385
23.03213561	×ÔÉí³µÁ¾	Road 1	375.4274024	84.71173782	-0.000900711	0.600601375	0.403921574	0	396.1242	987.2861	646.3732	0.5074	4.0081	1305	2.059149469	0.004756635	49.08678591	0.113390475
23.04883957	×ÔÉí³µÁ¾	Road 1	375.8206274	84.74863129	-0.000890503	0.601110637	0.403921574	0	396.5247	987.2949	646.3528	0.5059	4.0096	1306	2.576407507	0.005951501	49.12982213	0.113489889
23.06551605	×ÔÉí³µÁ¾	Road 1	376.2133372	84.77544479	-0.000883741	0.602017879	0.403921574	0	397.0196	987.3066	646.3275	0.5031	4.0124	1307	2.137143697	0.004936802	49.16546214	0.113572218
23.08212691	×ÔÉí³µÁ¾	Road 1	376.6046103	84.79893494	-0.000876174	0.601958692	0.403921574	0	397.3497	987.3145	646.3107	0.5013	4.0142	1308	1.995731175	0.004610139	49.19861295	0.113648796
23.0988283	×ÔÉí³µÁ¾	Road 1	376.998188	84.83598633	-0.000866153	0.602416754	0.403921574	0	397.8685	987.3262	646.2843	0.499	4.0165	1309	2.585945706	0.005973535	49.24180186	0.113748562
23.1155363	×ÔÉí³µÁ¾	Road 1	377.3920298	84.85940094	-0.000858687	0.602953196	0.403921574	0	398.1989	987.334	646.2675	0.4972	4.0184	1310	1.987597617	0.00459135	49.27501063	0.113825275
23.13220104	×ÔÉí³µÁ¾	Road 1	377.7850163	84.89488678	-0.000852087	0.602425873	0.403921574	0	398.6945	987.3457	646.2422	0.4945	4.0201	1311	2.522218885	0.005826326	49.31704276	0.113922369
23.14881923	×ÔÉí³µÁ¾	Road 1	378.1770203	84.91986008	-0.000842251	0.602698803	0.403921574	0	399.0486	987.3545	646.2242	0.4921	4.0225	1312	2.063170604	0.004765924	49.35132892	0.11400157
23.16546931	×ÔÉí³µÁ¾	Road 1	378.5698858	84.94349442	-0.000834924	0.602819204	0.403921574	0	399.3792	987.3623	646.2073	0.4902	4.0243	1313	2.002532779	0.004625851	49.38467125	0.114078591
23.18215861	×ÔÉí³µÁ¾	Road 1	378.9638401	84.9787056	-0.00082522	0.603729248	0.411764711	0	399.8754	987.374	646.182	0.4873	4.0271	1314	2.510031694	0.005798173	49.42656193	0.114175358
23.19887431	×ÔÉí³µÁ¾	Road 1	379.3584803	84.99228058	-0.000813197	0.60346961	0.411764711	0	400.0408	987.3779	646.1736	0.4864	4.028	1315	1.557499188	0.003597823	49.45259661	0.114235498
23.21562959	×ÔÉí³µÁ¾	Road 1	379.7542121	85.02599487	-0.000802081	0.605453849	0.411764711	0	400.5372	987.3896	646.1483	0.4836	4.0307	1316	2.439539767	0.005635337	49.49347178	0.11432992
23.23214624	×ÔÉí³µÁ¾	Road 1	380.1444699	85.06130905	-0.000791066	0.606223881	0.411764711	0	401.0338	987.4004	646.123	0.4818	4.0325	1317	2.53297067	0.005851162	49.53530798	0.114426561
23.24889089	×ÔÉí³µÁ¾	Road 1	380.5402256	85.08510818	-0.000779378	0.606714129	0.411764711	0	401.365	987.4082	646.1061	0.48	4.0343	1318	2.006711881	0.004635504	49.56890967	0.114504181
23.2654585	×ÔÉí³µÁ¾	Road 1	380.9319137	85.11050034	-0.000764738	0.606195092	0.411764711	0	401.7199	987.417	646.088	0.4776	4.0366	1319	2.089093104	0.004825805	49.60352094	0.114584133
23.28219325	×ÔÉí³µÁ¾	Road 1	381.3277194	85.1461853	-0.00075104	0.607514679	0.411764711	0	402.217	987.4287	646.0626	0.4749	4.0394	1320	2.530996	0.005846601	49.64587654	0.114681975
23.29887156	×ÔÉí³µÁ¾	Road 1	381.7223	85.1699295	-0.000736012	0.607005596	0.411764711	0	402.5485	987.4365	646.0458	0.4731	4.0408	1321	2.01015085	0.004643448	49.67940245	0.11475942
23.33222963	×ÔÉí³µÁ¾	Road 1	382.5119518	85.21914139	-0.000724135	0.607213318	0.411764711	0	403.2355	987.4531	646.0107	0.4689	4.0447	1322	2.048975421	0.004733133	49.74775232	0.114917308
23.348802	×ÔÉí³µÁ¾	Road 1	382.904409	85.25310287	-0.000712386	0.608173609	0.411764711	0	403.6147	987.4619	645.9915	0.467	4.0465	1323	2.472599357	0.005711705	49.78872915	0.115011964
23.36545208	×ÔÉí³µÁ¾	Road 1	383.2988395	85.28184586	-0.000694285	0.607605934	0.411764711	0	404.1126	987.4736	645.966	0.4643	4.0491	1324	2.23537586	0.005163718	49.82594834	0.115097941
23.38213772	×ÔÉí³µÁ¾	Road 1	383.6942775	85.31750336	-0.000686418	0.608106315	0.411764711	0	404.6107	987.4854	645.9407	0.4616	4.0517	1325	2.538899678	0.005864858	49.8683115	0.1151958
23.3988963	×ÔÉí³µÁ¾	Road 1	384.0915	85.32948532	-0.000680735	0.607594132	0.419607848	0	404.7768	987.4893	645.9322	0.4607	4.0526	1326	1.490870175	0.00344391	49.89329637	0.115253515
23.41548003	×ÔÉí³µÁ¾	Road 1	384.4847661	85.37029266	-0.000677199	0.609157145	0.419607848	0	405.3463	987.5029	645.9031	0.4573	4.056	1327	2.778971774	0.006419425	49.93938209	0.115359973
23.43218693	×ÔÉí³µÁ¾	Road 1	384.8810632	85.3940506	-0.000674378	0.610565603	0.419607848	0	405.6787	987.5107	645.8862	0.4555	4.0578	1328	2.013460129	0.004651093	49.97302076	0.115437678
23.44882528	×ÔÉí³µÁ¾	Road 1	385.2759007	85.43003082	-0.000673675	0.611042261	0.427450985	0	406.1775	987.5225	645.8608	0.4529	4.0595	1329	2.560649996	0.005915101	50.01562575	0.115536095
23.46557176	×ÔÉí³µÁ¾	Road 1	385.6734152	85.45389862	-0.000673675	0.612461984	0.427450985	0	406.5101	987.5303	645.8439	0.4511	4.0613	1330	2.017022322	0.004659322	50.04940379	0.115614123
23.48216503	×ÔÉí³µÁ¾	Road 1	386.0674119	85.47975769	-0.000673675	0.614249825	0.427450985	0	406.8665	987.5391	645.8257	0.4487	4.0636	1331	2.115885934	0.004887697	50.08451324	0.115695226
23.49880888	×ÔÉí³µÁ¾	Road 1	386.4627212	85.50387268	-0.000673675	0.615033746	0.435294122	0	407.1994	987.5469	645.8087	0.4469	4.0654	1332	2.035491232	0.004701985	50.11839165	0.115773485
23.51544173	×ÔÉí³µÁ¾	Road 1	386.8579444	85.54175491	-0.000673675	0.617252052	0.435294122	0	407.7225	987.5596	645.7821	0.4437	4.0686	1333	2.648633778	0.006118344	50.16244598	0.11587525
23.53218235	×ÔÉí³µÁ¾	Road 1	387.2558416	85.5661377	-0.000672268	0.618641019	0.435294122	0	408.0556	987.5674	645.7651	0.442	4.0704	1334	2.042388181	0.004717917	50.19663682	0.115954231
23.54879321	×ÔÉí³µÁ¾	Road 1	387.6507666	85.59038315	-0.000671566	0.620489478	0.435294122	0	408.3887	987.5752	645.7481	0.4402	4.0722	1335	2.045183222	0.004724373	50.23060907	0.116032707
23.56546418	×ÔÉí³µÁ¾	Road 1	388.0472584	85.6201149	-0.000666663	0.620979428	0.435294122	0	408.7934	987.585	645.7275	0.4378	4.0746	1336	2.28532344	0.005279097	50.26870764	0.116120715
23.58218647	×ÔÉí³µÁ¾	Road 1	388.4451487	85.65842285	-0.000663176	0.621919036	0.435294122	0	409.3173	987.5967	645.7008	0.4356	4.0769	1337	2.661659296	0.006148433	50.31321668	0.116223531
23.59886954	×ÔÉí³µÁ¾	Road 1	388.8422197	85.68300476	-0.000657622	0.622038484	0.435294122	0	409.6508	987.6055	645.6838	0.4329	4.0796	1338	2.057323624	0.004752418	50.34753916	0.116302815
23.61543568	×ÔÉí³µÁ¾	Road 1	389.2366205	85.70752487	-0.000648662	0.623187602	0.435294122	0	409.9844	987.6133	645.6667	0.4311	4.0814	1339	2.062766606	0.004764991	50.38171123	0.116381753
23.63218033	×ÔÉí³µÁ¾	Road 1	389.6354507	85.74611435	-0.000637747	0.623877525	0.435294122	0	410.5088	987.626	645.64	0.428	4.0846	1340	2.674264066	0.00617755	50.42649085	0.116485194
23.6488689	×ÔÉí³µÁ¾	Road 1	390.0330595	85.77078552	-0.000626285	0.623998582	0.435294122	0	410.8427	987.6338	645.623	0.4262	4.0864	1341	2.0627279	0.004764901	50.46091483	0.116564713
23.66546033	×ÔÉí³µÁ¾	Road 1	390.4284744	85.79691238	-0.000612316	0.624748349	0.435294122	0	411.2004	987.6426	645.6049	0.4239	4.0887	1342	2.134715391	0.004931193	50.49633281	0.116646529
23.68257484	×ÔÉí³µÁ¾	Road 1	390.8365314	85.83392944	-0.000597257	0.625217557	0.435294122	0	411.7015	987.6543	645.5792	0.4213	4.0913	1343	2.571639795	0.005940488	50.54034516	0.116748197
23.69879421	×ÔÉí³µÁ¾	Road 1	391.2233645	85.8602005	-0.000581809	0.624933898	0.435294122	0	412.0596	987.6631	645.561	0.419	4.0936	1344	2.169462281	0.005011458	50.57553248	0.11682948
23.73216219	×ÔÉí³µÁ¾	Road 1	392.0196825	85.91306534	-0.000565376	0.625730336	0.435294122	0	412.7761	987.6797	645.5245	0.4154	4.0972	1345	2.144127045	0.004952933	50.64707766	0.116994749
23.74876975	×ÔÉí³µÁ¾	Road 1	392.4161875	85.94991074	-0.000550485	0.625606298	0.435294122	0	413.1345	987.6885	645.5062	0.4132	4.0994	1346	2.616065181	0.006043111	50.69052412	0.117095111
23.76545428	×ÔÉí³µÁ¾	Road 1	392.8146532	85.97640152	-0.000518532	0.62588799	0.435294122	0	413.6364	987.7002	645.4807	0.4106	4.102	1347	2.148227328	0.004962405	50.72636629	0.117177906
23.78216118	×ÔÉí³µÁ¾	Road 1	393.2137668	86.0009491	-0.000503898	0.626014233	0.435294122	0	413.9711	987.708	645.4636	0.4088	4.1038	1348	2.060756719	0.004760348	50.76079514	0.117257437
23.79883362	×ÔÉí³µÁ¾	Road 1	393.6122369	86.03974457	-0.000492963	0.625632048	0.435294122	0	414.4973	987.7207	645.4368	0.4057	4.1069	1349	2.69899876	0.006234687	50.80579404	0.117361384
23.81544411	×ÔÉí³µÁ¾	Road 1	394.0093398	86.06429214	-0.000481062	0.626152575	0.435294122	0	414.8323	987.7295	645.4197	0.403	4.1096	1350	2.068395327	0.004777993	50.8401511	0.117440749
23.83211105	×ÔÉí³µÁ¾	Road 1	394.4079631	86.10122681	-0.000471015	0.6253829	0.435294122	0	415.335	987.7412	645.3941	0.4004	4.1122	1351	2.618246296	0.006048149	50.88378926	0.117541553
23.84878239	×ÔÉí³µÁ¾	Road 1	394.8068062	86.12595291	-0.000463847	0.625643611	0.435294122	0	415.6702	987.749	645.377	0.3987	4.1139	1352	2.073616459	0.004790054	50.91835922	0.11762141
23.86547902	×ÔÉí³µÁ¾	Road 1	395.2063686	86.15058289	-0.000456209	0.625536799	0.435294122	0	416.0056	987.7568	645.3599	0.397	4.1147	1353	2.068165986	0.004777463	50.95289063	0.117701177
23.88213057	×ÔÉí³µÁ¾	Road 1	395.605031	86.18926163	-0.000450266	0.624988317	0.435294122	0	416.5327	987.7695	645.333	0.3938	4.1178	1354	2.70012347	0.006237285	50.99785186	0.117805038
23.8988503	×ÔÉí³µÁ¾	Road 1	396.0053991	86.20508194	-0.000447583	0.625537992	0.435294122	0	416.7004	987.7744	645.3245	0.392	4.1196	1355	1.675326252	0.003870004	51.02586286	0.117869743
23.91547618	×ÔÉí³µÁ¾	Road 1	396.4036744	86.23848038	-0.000443311	0.625577509	0.443137258	0	417.2039	987.7861	645.2988	0.3894	4.1222	1356	2.467569772	0.005700086	51.06688839	0.117964512
23.93216365	×ÔÉí³µÁ¾	Road 1	396.8036044	86.27718658	-0.000439066	0.626297772	0.443137258	0	417.7316	987.7988	645.272	0.3863	4.1253	1357	2.700071565	0.006237165	51.11194575	0.118068595
23.94883756	×ÔÉí³µÁ¾	Road 1	397.2032665	86.28953247	-0.000437481	0.627502322	0.443137258	0	417.8995	987.8027	645.2634	0.3855	4.1262	1358	1.52325001	0.003518708	51.13734428	0.118127265
23.96548251	×ÔÉí³µÁ¾	Road 1	397.6023897	86.32310257	-0.0004359	0.628212571	0.443137258	0	418.3555	987.8135	645.2402	0.383	4.1286	1359	2.475671859	0.005718802	51.17855171	0.118222454
23.98210913	×ÔÉí³µÁ¾	Road 1	398.0012531	86.36199417	-0.000433274	0.628472745	0.443137258	0	418.8837	987.8262	645.2133	0.3799	4.1317	1360	2.717083332	0.006276462	51.22372762	0.118326811
23.99879146	×ÔÉí³µÁ¾	Road 1	398.4015755	86.38841629	-0.00043275	0.629012227	0.443137258	0	419.244	987.835	645.1949	0.3777	4.134	1361	2.154169565	0.004976132	51.25966421	0.118409824
24.01551449	×ÔÉí³µÁ¾	Road 1	398.8029893	86.41318359	-0.00043275	0.628513098	0.443137258	0	419.5803	987.8428	645.1777	0.376	4.1357	1362	2.077948611	0.004800061	51.29441379	0.118490096
24.03214881	×ÔÉí³µÁ¾	Road 1	399.2024462	86.45048218	-0.00043275	0.629422188	0.443137258	0	420.085	987.8555	645.152	0.3724	4.1392	1363	2.647235577	0.006115114	51.33844875	0.118591817
24.04884251	×ÔÉí³µÁ¾	Road 1	399.6034442	86.47529068	-0.00043118	0.629291952	0.443137258	0	420.4216	987.8633	645.1348	0.3707	4.1409	1364	2.083014315	0.004811763	51.37322197	0.118672143
24.06540828	×ÔÉí³µÁ¾	Road 1	400.0014828	86.49998932	-0.00043118	0.62938267	0.443137258	0	420.7583	987.8721	645.1177	0.3681	4.1436	1365	2.087145115	0.004821305	51.40779714	0.118752011
24.08214487	×ÔÉí³µÁ¾	Road 1	400.4037498	86.52667236	-0.00043118	0.629891634	0.443137258	0	421.1191	987.8799	645.0993	0.3668	4.1448	1366	2.164953041	0.005001042	51.44403106	0.118835712
24.09875353	×ÔÉí³µÁ¾	Road 1	400.8031219	86.56566696	-0.00043118	0.62971282	0.443137258	0	421.6485	987.8936	645.0723	0.3628	4.1489	1367	2.729313754	0.006304715	51.48936131	0.118940425
24.11540324	×ÔÉí³µÁ¾	Road 1	401.2035956	86.5903862	-0.00043118	0.630272448	0.443137258	0	421.9856	987.9014	645.0552	0.3611	4.1506	1368	2.084314424	0.004814766	51.52406454	0.119020589
24.13214349	×ÔÉí³µÁ¾	Road 1	401.6064199	86.62758865	-0.00043118	0.629668653	0.443137258	0	422.4913	987.9131	645.0294	0.3585	4.1532	1369	2.637127454	0.006091764	51.56821072	0.119122567
24.14886322	×ÔÉí³µÁ¾	Road 1	402.0088656	86.65241089	-0.00043118	0.630418777	0.443137258	0	422.8286	987.9219	645.0122	0.3559	4.1559	1370	2.085549535	0.004817619	51.60308054	0.119203116
24.16545831	×ÔÉí³µÁ¾	Road 1	402.4084264	86.67732925	-0.00043118	0.629249454	0.443137258	0	423.166	987.9297	644.995	0.3542	4.1576	1371	2.098751307	0.004848116	51.63790952	0.119283571
24.18214468	×ÔÉí³µÁ¾	Road 1	402.8103653	86.71628952	-0.00043118	0.628860891	0.443137258	0	423.6963	987.9424	644.968	0.3511	4.1607	1372	2.723808001	0.006291996	51.68335999	0.119388562
24.19884571	×ÔÉí³µÁ¾	Road 1	403.212772	86.74100189	-0.00043118	0.62962389	0.443137258	0	424.0339	987.9502	644.9508	0.3495	4.1625	1373	2.083690999	0.004813326	51.71815977	0.119468949
24.2154947	×ÔÉí³µÁ¾	Road 1	403.6140401	86.76598892	-0.00043118	0.629020274	0.443137258	0	424.3716	987.959	644.9335	0.3468	4.1651	1374	2.100039529	0.004851091	51.75312329	0.119549715
24.23207403	×ÔÉí³µÁ¾	Road 1	404.0138091	86.80494919	-0.00043118	0.628865302	0.443137258	0	424.9025	987.9717	644.9065	0.3438	4.1682	1375	2.737591682	0.006323837	51.79851074	0.11965456
24.24883518	×ÔÉí³µÁ¾	Road 1	404.4180846	86.83128204	-0.00043118	0.62919116	0.443137258	0	425.2646	987.9805	644.8881	0.3415	4.1705	1376	2.154093287	0.004975955	51.83461581	0.119737963
24.26548562	×ÔÉí³µÁ¾	Road 1	404.8198051	86.85615921	-0.00043118	0.629275024	0.443137258	0	425.6027	987.9883	644.8708	0.3399	4.1722	1377	2.096859916	0.004843746	51.86952947	0.119818613
24.29887559	×ÔÉí³µÁ¾	Road 1	405.6257397	86.89330673	-0.00043118	0.629101694	0.443137258	0	426.11	988.001	644.845	0.3364	4.1757	1378	1.811094307	0.004183628	51.93000185	0.119958304
24.31541424	×ÔÉí³µÁ¾	Road 1	406.0252015	86.9516304	-0.00043118	0.628881454	0.450980395	0	426.9076	988.0205	644.8043	0.3314	4.1808	1379	3.625339123	0.008374533	51.98996005	0.120096808
24.33243014	×ÔÉí³µÁ¾	Road 1	406.436316	86.97818298	-0.00043118	0.629585564	0.450980395	0	427.2703	988.0293	644.7859	0.3292	4.1831	1380	2.149256073	0.004964782	52.02653158	0.120181288
24.34881813	×ÔÉí³µÁ¾	Road 1	406.8323729	87.00301208	-0.00043118	0.631199539	0.450980395	0	427.6089	988.0371	644.7686	0.3275	4.1848	1381	2.115681868	0.004887225	52.06120336	0.12026138
24.36549424	×ÔÉí³µÁ¾	Road 1	407.2355655	87.0403244	-0.00043118	0.63188982	0.450980395	0	428.1171	988.0498	644.7427	0.324	4.1883	1382	2.659646649	0.006143784	52.10555591	0.120363834
24.38207064	×ÔÉí³µÁ¾	Road 1	407.6364617	87.0651123	-0.00043118	0.632009923	0.450980395	0	428.456	988.0576	644.7255	0.3224	4.19	1383	2.102153266	0.004855974	52.14040205	0.120444329
24.39882372	×ÔÉí³µÁ¾	Road 1	408.0417472	87.0901062	-0.00043118	0.631704211	0.450980395	0	428.795	988.0664	644.7081	0.3197	4.1926	1384	2.100054672	0.004851126	52.17558443	0.1205256
24.41546794	×ÔÉí³µÁ¾	Road 1	408.44458	87.129245	-0.00043118	0.632350564	0.450980395	0	429.3278	988.0791	644.681	0.3167	4.1957	1385	2.747876797	0.006347595	52.22132069	0.120631251
24.43208539	×ÔÉí³µÁ¾	Road 1	408.8468801	87.15417023	-0.00043118	0.632699013	0.450980395	0	429.6671	988.0869	644.6637	0.3151	4.1974	1386	2.107437316	0.00486818	52.25634094	0.120712148
24.44873767	×ÔÉí³µÁ¾	Road 1	409.2501388	87.17912292	-0.00043118	0.632983387	0.450980395	0	430.0064	988.0957	644.6464	0.3125	4.2	1387	2.106834315	0.004866787	52.29142453	0.120793191
24.48212507	×ÔÉí³µÁ¾	Road 1	410.0593396	87.25216141	-0.00043118	0.632913888	0.450980395	0	431.0007	988.1191	644.5957	0.3071	4.2055	1388	2.62746043	0.006069434	52.3791486	0.120995833
24.49887339	×ÔÉí³µÁ¾	Road 1	410.4653799	87.27712784	-0.00043118	0.632584512	0.450980395	0	431.3404	988.1279	644.5784	0.3045	4.2081	1389	2.103004112	0.004857939	52.41437038	0.121077196
24.51546739	×ÔÉí³µÁ¾	Road 1	410.8677938	87.3020668	-0.00043118	0.633293927	0.458823532	0	431.6802	988.1357	644.5612	0.3028	4.2098	1390	2.11272856	0.004880403	52.44942899	0.121158181
24.532105	×ÔÉí³µÁ¾	Road 1	411.2713809	87.32702637	-0.00043118	0.633600533	0.458823532	0	432.0201	988.1445	644.5438	0.3002	4.2124	1391	2.111207783	0.00487689	52.48455446	0.121239321
24.54875325	×ÔÉí³µÁ¾	Road 1	411.6753576	87.35549469	-0.00043118	0.635482848	0.458823532	0	432.4087	988.1533	644.524	0.2985	4.2141	1392	2.270133204	0.005244008	52.5223482	0.121326624
24.56542642	×ÔÉí³µÁ¾	Road 1	412.0801387	87.39861603	-0.00043118	0.636371195	0.458823532	0	432.9918	988.168	644.4943	0.2944	4.2172	1393	2.932686754	0.006774506	52.57124539	0.121439577
24.58208457	×ÔÉí³µÁ¾	Road 1	412.4846717	87.42382278	-0.00043118	0.635578513	0.458823532	0	433.332	988.1758	644.4769	0.2928	4.2188	1394	2.123027072	0.004904193	52.60661108	0.121521272
24.59883142	×ÔÉí³µÁ¾	Road 1	412.891475	87.44879608	-0.00043118	0.626056433	0.458823532	0	433.6724	988.1846	644.4597	0.2902	4.2214	1395	2.106959206	0.004867076	52.64189601	0.12160278
24.61539939	×ÔÉí³µÁ¾	Road 1	413.2941044	87.4860054	-0.00043118	0.635934949	0.458823532	0	434.1831	988.1973	644.4336	0.2868	4.2248	1396	2.678071228	0.006186345	52.68626622	0.121705275
24.63213524	×ÔÉí³µÁ¾	Road 1	413.7009311	87.51129456	-0.000430658	0.642960906	0.458823532	0	434.5238	988.2051	644.4162	0.2852	4.2265	1397	2.123260697	0.004904732	52.7218008	0.12178736
24.64879302	×ÔÉí³µÁ¾	Road 1	414.1060361	87.54936905	-0.000428573	0.639201462	0.458823532	0	435.0349	988.2178	644.3902	0.2817	4.2299	1398	2.709914355	0.006259902	52.76694195	0.121891636
24.66539728	×ÔÉí³µÁ¾	Road 1	414.5099552	87.57445221	-0.000427013	0.634168625	0.458823532	0	435.3757	988.2256	644.3728	0.2801	4.2315	1399	2.124252378	0.004907023	52.80221359	0.121973113
24.68215476	×ÔÉí³µÁ¾	Road 1	414.9177179	87.59941177	-0.000426494	0.634352803	0.458823532	0	435.7167	988.2344	644.3554	0.2775	4.2341	1400	2.108735426	0.004871179	52.83755069	0.122054742
24.69876489	×ÔÉí³µÁ¾	Road 1	415.3220105	87.62447433	-0.000423906	0.637836099	0.458823532	0	436.0577	988.2422	644.338	0.2759	4.2357	1401	2.123951772	0.004906329	52.87282979	0.122136237
24.71548425	×ÔÉí³µÁ¾	Road 1	415.7291542	87.66587219	-0.000420814	0.63790828	0.458823532	0	436.6183	988.2559	644.3094	0.2724	4.2392	1402	2.857268794	0.006600291	52.9206015	0.122246589
24.73212553	×ÔÉí³µÁ¾	Road 1	416.1345132	87.69110641	-0.000418248	0.63638103	0.458823532	0	436.9596	988.2637	644.2921	0.2708	4.2408	1403	2.131013313	0.004922641	52.95606429	0.122328509
24.74962969	×ÔÉí³µÁ¾	Road 1	416.5610807	87.73019714	-0.000416714	0.635269701	0.458823532	0	437.4962	988.2764	644.2648	0.2678	4.2438	1404	2.675115985	0.006179518	53.00288994	0.122436676
24.76539747	×ÔÉí³µÁ¾	Road 1	416.9454515	87.75712051	-0.000414674	0.635787845	0.458823532	0	437.8621	988.2852	644.2461	0.2657	4.2469	1405	2.277310549	0.005260587	53.03879807	0.122519624
24.7820974	×ÔÉí³µÁ¾	Road 1	417.3526616	87.78216248	-0.000414674	0.635327518	0.458823532	0	438.2038	988.293	644.2286	0.264	4.2485	1406	2.120144325	0.004897533	53.07420433	0.122601412
24.83220636	×ÔÉí³µÁ¾	Road 1	418.5757569	87.87137833	-0.000414674	0.63348037	0.458823532	0	439.4249	988.3213	644.1664	0.2578	4.2546	1407	2.334790105	0.005393365	53.19119824	0.122871668
24.84878459	×ÔÉí³µÁ¾	Road 1	418.9805248	87.89622803	-0.000414674	0.633868694	0.458823532	0	439.767	988.3291	644.149	0.2561	4.2572	1408	2.122063153	0.004901966	53.2263783	0.122952934
24.86542844	×ÔÉí³µÁ¾	Road 1	419.3870681	87.9337532	-0.000414674	0.632816136	0.466666669	0	440.2804	988.3398	644.1228	0.2547	4.2586	1409	2.696880229	0.006229793	53.27126476	0.123056622
24.8824865	×ÔÉí³µÁ¾	Road 1	419.8038892	87.96756363	-0.000414674	0.634817719	0.466666669	0	440.7451	988.3506	644.0991	0.2523	4.2619	1410	2.490706198	0.005753531	53.31375137	0.123154766
24.89888769	×ÔÉí³µÁ¾	Road 1	420.2047734	87.99261246	-0.000414674	0.635989726	0.466666669	0	441.0876	988.3574	644.0817	0.2517	4.2625	1411	2.145593623	0.004956321	53.34894166	0.123236055
24.91541827	×ÔÉí³µÁ¾	Road 1	420.6089361	88.01781235	-0.000414674	0.637194335	0.466666669	0	441.4302	988.3643	644.0641	0.2511	4.2641	1412	2.143979262	0.004952592	53.38438288	0.123317924
24.93210647	×ÔÉí³µÁ¾	Road 1	421.0170769	88.04464645	-0.000414674	0.637111545	0.466666669	0	441.7974	988.3721	644.0454	0.2509	4.2662	1413	2.20807594	0.005100655	53.4212317	0.123403045
24.94873639	×ÔÉí³µÁ¾	Road 1	421.4239755	88.0843071	-0.000414674	0.637542069	0.466666669	0	442.3362	988.3828	644.0179	0.2499	4.2682	1414	2.800128476	0.006468297	53.46779761	0.123510612
24.96541323	×ÔÉí³µÁ¾	Road 1	421.8321379	88.10930099	-0.000414674	0.638325274	0.466666669	0	442.6792	988.3896	644.0005	0.2492	4.2688	1415	2.126314981	0.004911788	53.50325782	0.123592526
24.98213772	×ÔÉí³µÁ¾	Road 1	422.2416347	88.14548721	-0.000414165	0.638996482	0.466666669	0	443.0222	988.3965	643.983	0.2486	4.2713	1416	2.633412978	0.006083184	53.54730031	0.123694264
24.99880686	×ÔÉí³µÁ¾	Road 1	422.6498426	88.1598175	-0.000414165	0.639978707	0.466666669	0	443.3654	988.4033	643.9655	0.248	4.2719	1417	1.640610434	0.00378981	53.57464788	0.123757437
25.01540122	×ÔÉí³µÁ¾	Road 1	423.0563859	88.19596252	-0.000410615	0.640760481	0.466666669	0	443.8559	988.4131	643.9404	0.248	4.2738	1418	2.645787053	0.006111768	53.61855303	0.123858858
25.03206597	×ÔÉí³µÁ¾	Road 1	423.4647706	88.22129288	-0.000407587	0.640799344	0.466666669	0	444.1993	988.4199	643.9229	0.2474	4.2753	1419	2.144854185	0.004954613	53.65429647	0.123941425
25.04878642	×ÔÉí³µÁ¾	Road 1	423.8747141	88.26292419	-0.000402575	0.641333044	0.466666669	0	444.641	988.4287	643.9004	0.2466	4.2781	1420	2.885209126	0.006664833	53.70253849	0.124052864
25.06548269	×ÔÉí³µÁ¾	Road 1	424.28419	88.28999176	-0.000391693	0.641951203	0.466666669	0	445.1319	988.4375	643.8752	0.2467	4.2789	1421	2.223466587	0.005136208	53.73966208	0.124138619
25.08206422	×ÔÉí³µÁ¾	Road 1	424.6910112	88.32634277	-0.000381972	0.641906798	0.466666669	0	445.4757	988.4443	643.8578	0.2471	4.2805	1422	2.660006242	0.006144614	53.78376907	0.124240507
25.09884663	×ÔÉí³µÁ¾	Road 1	425.1028959	88.3535202	-0.000368635	0.642301083	0.466666669	0	445.9916	988.4541	643.8314	0.2466	4.2819	1423	2.223495013	0.005136273	53.82108467	0.124326706
25.11542267	×ÔÉí³µÁ¾	Road 1	425.5098319	88.37878189	-0.000350581	0.642196953	0.466666669	0	446.3356	988.46	643.8138	0.247	4.2815	1424	2.151196705	0.004969264	53.85674298	0.124409076
25.13208228	×ÔÉí³µÁ¾	Road 1	425.9189958	88.41682892	-0.000332247	0.642517388	0.466666669	0	446.8519	988.4697	643.7875	0.2466	4.2829	1425	2.732344805	0.006311716	53.90226278	0.124514227
25.14875802	×ÔÉí³µÁ¾	Road 1	426.3286728	88.44209747	-0.000314563	0.643174112	0.466666669	0	447.1961	988.4756	643.7699	0.2479	4.2834	1426	2.145874354	0.00495697	53.93804682	0.124596888
25.16544548	×ÔÉí³µÁ¾	Road 1	426.7387561	88.46757202	-0.000293862	0.642749965	0.466666669	0	447.5405	988.4824	643.7524	0.2473	4.285	1427	2.155026753	0.004978112	53.97400876	0.12467996
25.18213295	×ÔÉí³µÁ¾	Road 1	427.1490151	88.50548172	-0.000277191	0.642063856	0.466666669	0	448.0573	988.4922	643.726	0.2468	4.2864	1428	2.725576829	0.006296082	54.01949174	0.124785026
25.19874711	×ÔÉí³µÁ¾	Road 1	427.5575893	88.53094254	-0.000260789	0.642516196	0.466666669	0	448.4019	988.498	643.7084	0.2472	4.286	1429	2.16087636	0.004991624	54.05539288	0.124867958
25.21541405	×ÔÉí³µÁ¾	Road 1	427.967637	88.5688385	-0.000244689	0.641765118	0.466666669	0	448.9191	988.5078	643.682	0.2468	4.2871	1430	2.728824134	0.006303584	54.10087403	0.124973019
25.23211142	×ÔÉí³µÁ¾	Road 1	428.3785507	88.59417572	-0.000233405	0.642490327	0.466666669	0	449.2639	988.5137	643.6644	0.2471	4.2867	1431	2.150693821	0.004968103	54.13678495	0.125055973
25.24888429	×ÔÉí³µÁ¾	Road 1	428.7914491	88.62130508	-0.000221803	0.64150697	0.466666669	0	449.6336	988.5205	643.6455	0.247	4.2869	1432	2.227835965	0.005146301	54.17415217	0.125142292
25.26541194	×ÔÉí³µÁ¾	Road 1	429.1984353	88.64843445	-0.00021189	0.642666161	0.466666669	0	450.0033	988.5273	643.6266	0.2459	4.287	1433	2.246808713	0.005190128	54.21128664	0.125228072
25.28206569	×ÔÉí³µÁ¾	Road 1	429.6087021	88.68639908	-0.000203859	0.641217589	0.466666669	0	450.5211	988.5361	643.6002	0.2465	4.2866	1434	2.736587696	0.006321518	54.25686107	0.125333349
25.29874326	×ÔÉí³µÁ¾	Road 1	430.019681	88.71339111	-0.000198203	0.642602682	0.466666669	0	450.8911	988.543	643.5813	0.2463	4.2868	1435	2.230613497	0.005152717	54.29406229	0.125419284
25.31540324	×ÔÉí³µÁ¾	Road 1	430.4303518	88.74050674	-0.000192349	0.64163059	0.466666669	0	451.2613	988.5498	643.5624	0.2462	4.2869	1436	2.238201937	0.005170246	54.33135068	0.12550542
25.33206798	×ÔÉí³µÁ¾	Road 1	430.841316	88.77851944	-0.000188711	0.641635954	0.466666669	0	451.7796	988.5586	643.5359	0.2467	4.2863	1437	2.740177051	0.006329809	54.37701503	0.125610905
25.34870706	×ÔÉí³µÁ¾	Road 1	431.2517643	88.80380859	-0.000186311	0.641092777	0.466666669	0	452.1253	988.5645	643.5183	0.2461	4.2858	1438	2.1569356	0.004982521	54.41290446	0.125693809
25.36543522	×ÔÉí³µÁ¾	Road 1	431.6645278	88.82917328	-0.000181574	0.640738666	0.466666669	0	452.4711	988.5703	643.5006	0.2465	4.2844	1439	2.154719487	0.004977402	54.44894894	0.125777072
25.38211133	×ÔÉí³µÁ¾	Road 1	432.0761819	88.86695938	-0.000179235	0.640791833	0.466666669	0	452.99	988.5801	643.4741	0.2462	4.2848	1440	2.730984006	0.006308573	54.49449112	0.125882274
25.39879403	×ÔÉí³µÁ¾	Road 1	432.4881238	88.89391708	-0.000175765	0.640906155	0.466666669	0	453.3607	988.5869	643.4552	0.2461	4.2848	1441	2.232579667	0.005157259	54.53173659	0.125968312
25.4153708	×ÔÉí³µÁ¾	Road 1	432.8975666	88.91926117	-0.000172341	0.640546918	0.466666669	0	453.7069	988.5928	643.4375	0.2465	4.2844	1442	2.166285463	0.005004119	54.5676466	0.126051264
25.4321697	×ÔÉí³µÁ¾	Road 1	433.3126721	88.95699921	-0.000168122	0.641040564	0.466666669	0	454.2263	988.6016	643.411	0.2478	4.2838	1443	2.718518365	0.006279777	54.61331472	0.126156757
25.44877909	×ÔÉí³µÁ¾	Road 1	433.7232112	88.98222656	-0.0001637	0.640488565	0.466666669	0	454.5727	988.6074	643.3933	0.2482	4.2833	1444	2.159895397	0.004989358	54.64918927	0.126239627
25.46541414	×ÔÉí³µÁ¾	Road 1	434.1345593	89.02005386	-0.000159355	0.640314639	0.466666669	0	455.0925	988.6172	643.3668	0.2478	4.2836	1445	2.74137818	0.006332584	54.69479224	0.12634497
25.48209831	×ÔÉí³µÁ¾	Road 1	434.5472393	89.04537048	-0.000156148	0.640254021	0.466666669	0	455.4391	988.623	643.3491	0.2482	4.2832	1446	2.160093537	0.004989816	54.73083161	0.126428221
25.49873703	×ÔÉí³µÁ¾	Road 1	434.9589119	89.07065964	-0.000152722	0.639602602	0.466666669	0	455.7859	988.6289	643.3314	0.2486	4.2827	1447	2.162541868	0.004995472	54.76681353	0.126511339
25.5154245	×ÔÉí³µÁ¾	Road 1	435.3719074	89.09583206	-0.000149604	0.639487922	0.466666669	0	456.1327	988.6348	643.3137	0.249	4.2823	1448	2.154265461	0.004976353	54.80276277	0.126594382
25.53208997	×ÔÉí³µÁ¾	Road 1	435.7845496	89.13707886	-0.000147805	0.639106572	0.466666669	0	456.7027	988.6455	643.2846	0.2485	4.2827	1449	2.899378531	0.006697564	54.85108229	0.126706
25.54873786	×ÔÉí³µÁ¾	Road 1	436.196873	89.16235428	-0.000146021	0.639174998	0.474509805	0	457.0498	988.6514	643.2668	0.2489	4.2822	1450	2.163179442	0.004996945	54.88709464	0.126789189
25.59881162	×ÔÉí³µÁ¾	Road 1	437.4381656	89.24140091	-0.000146021	0.642250419	0.474509805	0	458.1413	988.6699	643.2112	0.25	4.2819	1451	2.211014369	0.005107443	54.99780846	0.127044938
25.61540745	×ÔÉí³µÁ¾	Road 1	437.8497731	89.28669891	-0.000146021	0.642648458	0.474509805	0	458.7619	988.6807	643.1794	0.2504	4.2814	1452	3.100022208	0.007161051	55.0492559	0.127163781
25.63210189	×ÔÉí³µÁ¾	Road 1	438.2639429	89.3118988	-0.000146021	0.642339528	0.474509805	0	459.1096	988.6875	643.1617	0.2499	4.2819	1453	2.159546469	0.004988552	55.08530831	0.127247062
25.64875343	×ÔÉí³µÁ¾	Road 1	438.6772245	89.34987717	-0.000146021	0.642406523	0.482352942	0	459.6313	988.6963	643.135	0.2505	4.2812	1454	2.755688014	0.006365639	55.13119477	0.12735306
25.66544274	×ÔÉí³µÁ¾	Road 1	439.0915613	89.37537231	-0.000146021	0.64477396	0.482352942	0	459.9792	988.7021	643.1172	0.2509	4.2808	1455	2.174887229	0.005023989	55.16749212	0.127436907
25.68209355	×ÔÉí³µÁ¾	Road 1	439.5050599	89.400737	-0.000146021	0.646592855	0.482352942	0	460.3272	988.709	643.0995	0.2504	4.2813	1456	2.172095373	0.00501754	55.20365928	0.127520453
25.69871504	×ÔÉí³µÁ¾	Road 1	439.9179486	89.42636261	-0.000146021	0.647083163	0.490196079	0	460.6754	988.7148	643.0817	0.2508	4.2808	1457	2.186837054	0.005051594	55.24000776	0.127604418
25.71547655	×ÔÉí³µÁ¾	Road 1	440.3345111	89.46835785	-0.000146021	0.648583412	0.490196079	0	461.2475	988.7246	643.0526	0.2515	4.2802	1458	2.932587466	0.006774277	55.28916237	0.127717965
25.73212223	×ÔÉí³µÁ¾	Road 1	440.7483135	89.49401093	-0.000146021	0.650161684	0.490196079	0	461.5959	988.7305	643.0347	0.2519	4.2797	1459	2.187807557	0.005053835	55.32557992	0.12780209
25.74877085	×ÔÉí³µÁ¾	Road 1	441.1623084	89.5198494	-0.000146021	0.651500046	0.490196079	0	461.9444	988.7373	643.017	0.2514	4.2802	1460	2.196755108	0.005074504	55.36215284	0.127886573
25.76547114	×ÔÉí³µÁ¾	Road 1	441.5777759	89.56025162	-0.000146021	0.651971638	0.490196079	0	462.4922	988.7461	642.989	0.2526	4.2791	1461	2.868603585	0.006626474	55.41005938	0.127997237
25.78223376	×ÔÉí³µÁ¾	Road 1	441.9949136	89.58603516	-0.000146021	0.653120339	0.490196079	0	462.8409	988.7529	642.9712	0.2521	4.2796	1462	2.187450925	0.005053012	55.44672677	0.128081939
25.79882262	×ÔÉí³µÁ¾	Road 1	442.4078468	89.61187363	-0.000146021	0.653849423	0.490196079	0	463.1898	988.7588	642.9534	0.2526	4.2791	1463	2.203033392	0.005089007	55.48327259	0.12816636
25.81538216	×ÔÉí³µÁ¾	Road 1	442.820237	89.65254364	-0.000146021	0.654509664	0.490196079	0	463.7382	988.7686	642.9254	0.2528	4.2789	1464	2.899703311	0.006698315	55.53129035	0.128277281
25.83211178	×ÔÉí³µÁ¾	Road 1	443.2369837	89.67853317	-0.000146021	0.654150009	0.498039216	0	464.0872	988.7744	642.9076	0.2532	4.2784	1465	2.201290177	0.00508498	55.5681171	0.128362351
25.84878313	×ÔÉí³µÁ¾	Road 1	443.6523986	89.70445404	-0.000146784	0.655728221	0.498039216	0	464.4365	988.7803	642.8898	0.2537	4.2779	1466	2.202857403	0.005088601	55.60484169	0.128447184
25.86544384	×ÔÉí³µÁ¾	Road 1	444.0677372	89.74522705	-0.000146784	0.658314347	0.498039216	0	464.9854	988.79	642.8617	0.2539	4.2777	1467	2.895619799	0.006688882	55.65308477	0.128558626
25.88204516	×ÔÉí³µÁ¾	Road 1	444.4817153	89.77118912	-0.000146784	0.658434212	0.498039216	0	465.3349	988.7969	642.8439	0.2535	4.2782	1468	2.211284108	0.005108066	55.68979502	0.128643427
25.89871797	×ÔÉí³µÁ¾	Road 1	444.8976578	89.81049957	-0.000146784	0.659702063	0.498039216	0	465.8593	988.8057	642.817	0.2542	4.2775	1469	2.828076775	0.006532857	55.736947	0.128752348
25.91543	×ÔÉí³µÁ¾	Road 1	445.3146997	89.83654404	-0.000146784	0.658973575	0.498039216	0	466.209	988.8115	642.7992	0.2547	4.277	1470	2.208461241	0.005101545	55.77385487	0.128837605
25.93203792	×ÔÉí³µÁ¾	Road 1	445.7292822	89.86654358	-0.000146784	0.660291374	0.498039216	0	466.6088	988.8184	642.7788	0.2551	4.2766	1471	2.401574781	0.005547638	55.81374004	0.128929739
25.94872099	×ÔÉí³µÁ¾	Road 1	446.1458615	89.89265671	-0.000147805	0.661250949	0.498039216	0	466.9587	988.8252	642.7609	0.2546	4.2771	1472	2.214950967	0.005116537	55.85069223	0.129015099
25.96543376	×ÔÉí³µÁ¾	Road 1	446.5633652	89.93207703	-0.000148061	0.66168052	0.498039216	0	467.4838	988.834	642.7341	0.2554	4.2764	1473	2.832226555	0.006542443	55.89802655	0.129124441
25.98211243	×ÔÉí³µÁ¾	Road 1	446.9801475	89.96019516	-0.000149089	0.661540687	0.498039216	0	467.859	988.8408	642.715	0.2554	4.2764	1474	2.310140754	0.005336425	55.93655663	0.129213446
25.99874968	×ÔÉí³µÁ¾	Road 1	447.3960164	89.98650742	-0.000149862	0.660332143	0.498039216	0	468.2094	988.8467	642.6971	0.2559	4.276	1475	2.229607155	0.005150393	55.97365116	0.129299134
26.01538106	×ÔÉí³µÁ¾	Road 1	447.8119201	90.02575607	-0.000152722	0.662080109	0.498039216	0	468.735	988.8564	642.6702	0.2556	4.2762	1476	2.835814859	0.006550732	56.02081469	0.129408082
26.03202161	×ÔÉí³µÁ¾	Road 1	448.2281741	90.0519928	-0.000155088	0.661111176	0.498039216	0	469.0855	988.8623	642.6523	0.2562	4.2758	1477	2.227236218	0.005144916	56.05787713	0.129493696
26.04869552	×ÔÉí³µÁ¾	Road 1	448.6454451	90.09139938	-0.000158281	0.662619472	0.505882382	0	469.6116	988.8711	642.6255	0.2569	4.275	1478	2.84035077	0.00656121	56.10523687	0.129603097
26.06543137	×ÔÉí³µÁ¾	Road 1	449.0643885	90.11766357	-0.000162334	0.662919044	0.505882382	0	469.9624	988.8779	642.6076	0.2565	4.2755	1479	2.222928072	0.005134964	56.14243947	0.129689035
26.08455387	×ÔÉí³µÁ¾	Road 1	449.543236	90.14778671	-0.000166732	0.664896905	0.505882382	0	470.3634	988.8848	642.5871	0.2569	4.2751	1480	2.228167761	0.005147068	56.18504761	0.12978746
26.09966222	×ÔÉí³µÁ¾	Road 1	449.921731	90.18737869	-0.000171209	0.665555239	0.505882382	0	470.89	988.8936	642.5602	0.2577	4.2744	1481	3.043448187	0.007030365	56.23102907	0.129893677
26.11646515	×ÔÉí³µÁ¾	Road 1	450.3428283	90.21938324	-0.000178074	0.665642262	0.505882382	0	471.3165	988.9014	642.5385	0.2576	4.2745	1482	2.486487322	0.005743786	56.27280936	0.12999019
26.19872732	×ÔÉí³µÁ¾	Road 1	452.407724	90.36504822	-0.000183932	0.666473508	0.505882382	0	473.25	988.9355	642.4397	0.2586	4.2738	1483	2.384553862	0.005508319	56.46896792	0.130443316
26.2154617	×ÔÉí³µÁ¾	Road 1	452.8279649	90.40468826	-0.000189918	0.666882098	0.505882382	0	473.7778	988.9443	642.4128	0.2594	4.273	1484	2.853408849	0.006591374	56.51671797	0.130553619
26.23203847	×ÔÉí³µÁ¾	Road 1	453.2443695	90.43117218	-0.000222811	0.66718179	0.505882382	0	474.1299	988.9502	642.3948	0.2599	4.2725	1485	2.251742537	0.005201525	56.55404459	0.130639843
26.24871055	×ÔÉí³µÁ¾	Road 1	453.663291	90.4576973	-0.000229608	0.667481899	0.505882382	0	474.482	988.957	642.3768	0.2595	4.273	1486	2.247107854	0.005190819	56.59150853	0.130726385
26.26539215	×ÔÉí³µÁ¾	Road 1	454.0826449	90.49932861	-0.000237595	0.667712271	0.505882382	0	475.0356	988.9668	642.3486	0.2598	4.2727	1487	2.955259058	0.006826648	56.64080699	0.130840264
26.28208219	×ÔÉí³µÁ¾	Road 1	454.5023341	90.52594986	-0.000244689	0.66692394	0.505882382	0	475.3879	988.9727	642.3306	0.2603	4.2722	1488	2.251742518	0.005201525	56.67838865	0.130927078
26.29871797	×ÔÉí³µÁ¾	Road 1	454.9207907	90.55441818	-0.000253019	0.666974008	0.505882382	0	475.7656	988.9795	642.3113	0.2603	4.2722	1489	2.343288762	0.005412997	56.7173711	0.131017127
26.31538051	×ÔÉí³µÁ¾	Road 1	455.3401038	90.59403076	-0.000262662	0.6665923	0.505882382	0	476.2946	988.9883	642.2843	0.2611	4.2715	1490	2.865462183	0.006619218	56.76511699	0.13112742
26.33208814	×ÔÉí³µÁ¾	Road 1	455.7606742	90.62049408	-0.000271777	0.666892052	0.505882382	0	476.6474	988.9951	642.2663	0.2617	4.2719	1491	2.245065375	0.005186101	56.80262671	0.131214068
26.34877268	×ÔÉí³µÁ¾	Road 1	456.1807861	90.646978	-0.000279533	0.666763067	0.505882382	0	477.0002	989.001	642.2483	0.2622	4.2713	1492	2.248317884	0.005193614	56.84013885	0.131300721
26.36544585	×ÔÉí³µÁ¾	Road 1	456.6007606	90.67909927	-0.000288632	0.666192889	0.505882382	0	477.4289	989.0088	642.2264	0.2622	4.2714	1493	2.514728766	0.005809023	56.88206736	0.131397576
26.38200649	×ÔÉí³µÁ¾	Road 1	457.0180832	90.71879425	-0.000293862	0.667269111	0.513725519	0	477.9586	989.0176	642.1993	0.2631	4.2705	1494	2.884360952	0.006662874	56.92983422	0.131507917
26.39873282	×ÔÉí³µÁ¾	Road 1	457.4397129	90.74718018	-0.000298335	0.667557836	0.513725519	0	478.337	989.0244	642.1799	0.2631	4.2705	1495	2.336513339	0.005397346	56.9689155	0.131598195
26.41649356	×ÔÉí³µÁ¾	Road 1	457.8875488	90.77373962	-0.000302855	0.669555962	0.521568656	0	478.6904	989.0313	642.162	0.2627	4.2709	1496	2.17893577	0.005033342	57.00761502	0.131687591
26.43200768	×ÔÉí³µÁ¾	Road 1	458.2788669	90.80404816	-0.000303681	0.670494974	0.521568656	0	479.0944	989.0381	642.1414	0.2632	4.2704	1497	2.539046474	0.005865197	57.0470061	0.131778584
26.44869772	×ÔÉí³µÁ¾	Road 1	458.7000489	90.8479454	-0.000304509	0.673261523	0.521568656	0	479.6753	989.0479	642.1116	0.264	4.2696	1498	3.071039783	0.007094102	57.09826186	0.131896985
26.46544384	×ÔÉí³µÁ¾	Road 1	459.1227708	90.87472458	-0.000304509	0.673552155	0.521568656	0	480.0291	989.0547	642.0936	0.2636	4.27	1499	2.26247245	0.005226311	57.13614949	0.131984505
26.4820316	×ÔÉí³µÁ¾	Road 1	459.541619	90.90155182	-0.000304509	0.675129533	0.521568656	0	480.383	989.0605	642.0755	0.2641	4.2695	1500	2.277318033	0.005260605	57.17392511	0.132071767
26.49874913	×ÔÉí³µÁ¾	Road 1	459.9639397	90.94375305	-0.000304509	0.675768793	0.521568656	0	480.9392	989.0703	642.0471	0.2645	4.2691	1501	2.99086787	0.006908905	57.22392502	0.132187267
26.5153182	×ÔÉí³µÁ¾	Road 1	460.382634	90.97066956	-0.000304509	0.675639033	0.521568656	0	481.2934	989.0762	642.0291	0.265	4.2685	1502	2.284490108	0.005277172	57.2617769	0.132274705
26.53200383	×ÔÉí³µÁ¾	Road 1	460.8043986	90.99756546	-0.000304509	0.676358998	0.529411793	0	481.6476	989.083	642.011	0.2646	4.2689	1503	2.275183054	0.005255673	57.29973977	0.132362399
26.54874115	×ÔÉí³µÁ¾	Road 1	461.2275949	91.02454376	-0.000304509	0.677507877	0.529411793	0	482.002	989.0889	641.9929	0.2652	4.2684	1504	2.275725189	0.005256925	57.33782932	0.132450386
26.56533039	×ÔÉí³µÁ¾	Road 1	461.6471896	91.05551147	-0.000304509	0.678394079	0.529411793	0	482.407	989.0967	641.9722	0.2648	4.2688	1505	2.476893165	0.005721623	57.37891907	0.132545303
26.58204131	×ÔÉí³µÁ¾	Road 1	462.0700693	91.10006104	-0.000304509	0.679883361	0.529411793	0	482.9896	989.1064	641.9424	0.2656	4.268	1506	3.106859676	0.007176846	57.43083758	0.132665235
26.59875774	×ÔÉí³µÁ¾	Road 1	462.4932141	91.127211	-0.000304509	0.681452453	0.529411793	0	483.3443	989.1123	641.9244	0.2662	4.2674	1507	2.28762483	0.005284413	57.46907849	0.132753571
26.61534587	×ÔÉí³µÁ¾	Road 1	462.9132365	91.15437469	-0.000304509	0.681313872	0.529411793	0	483.6992	989.1191	641.9063	0.2658	4.2678	1508	2.298763127	0.005310143	57.50721068	0.132841657
26.63207989	×ÔÉí³µÁ¾	Road 1	463.3371336	91.19323196	-0.000304509	0.682021022	0.529411793	0	484.1049	989.126	641.8855	0.2663	4.2673	1509	2.838876057	0.006557804	57.55471649	0.132951395
26.64866986	×ÔÉí³µÁ¾	Road 1	463.7575428	91.22822342	-0.000304509	0.68266046	0.529411793	0	484.6629	989.1357	641.8571	0.2667	4.2669	1510	2.672105776	0.006172564	57.59904663	0.133053798
26.6653544	×ÔÉí³µÁ¾	Road 1	464.1804839	91.25743332	-0.000304509	0.68252188	0.529411793	0	485.0435	989.1426	641.8375	0.2668	4.2668	1511	2.390252311	0.005521483	57.63892688	0.133145921
26.6820228	×ÔÉí³µÁ¾	Road 1	464.6031417	91.28456268	-0.000304509	0.682630599	0.529411793	0	485.3989	989.1494	641.8195	0.2664	4.2672	1512	2.293773143	0.005298616	57.67716043	0.133234241
26.69878505	×ÔÉí³µÁ¾	Road 1	465.0283156	91.31389618	-0.000304509	0.683100939	0.529411793	0	485.7797	989.1553	641.8	0.2674	4.2661	1513	2.390958681	0.005523115	57.71723827	0.13332682
26.71538271	×ÔÉí³µÁ¾	Road 1	465.4495303	91.36063614	-0.000304509	0.683718741	0.529411793	0	486.3893	989.166	641.7689	0.2678	4.2658	1514	3.233393201	0.007469138	57.77090504	0.133450791
26.73205845	×ÔÉí³µÁ¾	Road 1	465.8728523	91.3878067	-0.000304509	0.683829486	0.529411793	0	486.7451	989.1729	641.7507	0.2674	4.2662	1515	2.297413929	0.005307026	57.80921611	0.133539289
26.74873676	×ÔÉí³µÁ¾	Road 1	466.2963659	91.41510086	-0.000304509	0.684119284	0.529411793	0	487.101	989.1787	641.7325	0.268	4.2656	1516	2.303665219	0.005321467	57.84763734	0.133628042
26.76539307	×ÔÉí³µÁ¾	Road 1	466.7194652	91.44625397	-0.000304509	0.683120549	0.529411793	0	487.5078	989.1865	641.7118	0.2676	4.266	1517	2.489088883	0.005749795	57.88909638	0.133723813
26.78206991	×ÔÉí³µÁ¾	Road 1	467.143294	91.49118118	-0.000304509	0.683819771	0.529411793	0	488.0928	989.1963	641.6819	0.2685	4.2651	1518	3.141116438	0.007255979	57.94148027	0.133844819
26.79866867	×ÔÉí³µÁ¾	Road 1	467.5652732	91.52038422	-0.000304509	0.683020771	0.529411793	0	488.4745	989.2031	641.6624	0.2686	4.265	1519	2.403102915	0.005551168	57.98136881	0.133936962
26.81532535	×ÔÉí³µÁ¾	Road 1	467.9888419	91.5457077	-0.000304509	0.684099615	0.529411793	0	488.8055	989.209	641.6455	0.2687	4.2649	1520	2.214635577	0.005115808	58.01825728	0.134022174
26.83205643	×ÔÉí³µÁ¾	Road 1	468.4144386	91.5749176	-0.000304509	0.683111787	0.529411793	0	489.1874	989.2158	641.626	0.2688	4.2648	1521	2.393670665	0.005529379	58.058306	0.134114687
26.84872301	×ÔÉí³µÁ¾	Road 1	468.8385478	91.60810318	-0.000304509	0.682721496	0.529411793	0	489.6204	989.2236	641.6039	0.2689	4.2647	1522	2.588562068	0.005979578	58.10144846	0.134214346
26.86538995	×ÔÉí³µÁ¾	Road 1	469.2628732	91.6527626	-0.000304509	0.682741523	0.529411793	0	490.2065	989.2344	641.574	0.2688	4.2648	1523	3.134681774	0.007241115	58.15369402	0.134335033
26.8820184	×ÔÉí³µÁ¾	Road 1	469.6863444	91.6799881	-0.000304509	0.683031321	0.529411793	0	490.5634	989.2402	641.5558	0.2693	4.2642	1524	2.310087559	0.005336302	58.1921072	0.134423768
26.8987374	×ÔÉí³µÁ¾	Road 1	470.1122479	91.70723419	-0.000304509	0.682471991	0.529411793	0	490.9204	989.2471	641.5375	0.269	4.2645	1525	2.304635247	0.005323707	58.23063838	0.134512775
26.9153028	×ÔÉí³µÁ¾	Road 1	470.534373	91.73637543	-0.000304509	0.682761788	0.529411793	0	491.303	989.2539	641.518	0.269	4.2644	1526	2.407918387	0.005562291	58.27052653	0.134604916
26.93207091	×ÔÉí³µÁ¾	Road 1	470.9618808	91.78303299	-0.000304509	0.682112634	0.529411793	0	491.9155	989.2646	641.4868	0.2694	4.2641	1527	3.220362934	0.007439038	58.32452593	0.134729655
26.94872026	×ÔÉí³µÁ¾	Road 1	471.3864415	91.80051498	-0.000304509	0.682462275	0.529411793	0	492.1197	989.2676	641.4763	0.2701	4.2633	1528	1.846937957	0.004266427	58.35527624	0.134800688
26.96537621	×ÔÉí³µÁ¾	Road 1	471.8113502	91.83936539	-0.000304509	0.681833923	0.529411793	0	492.6559	989.2773	641.449	0.27	4.2633	1529	2.865177715	0.006618561	58.40299848	0.134910926
26.98199806	×ÔÉí³µÁ¾	Road 1	472.2355148	91.86654282	-0.000304509	0.682552397	0.529411793	0	493.0135	989.2842	641.4307	0.2697	4.2636	1530	2.312399014	0.005341642	58.44143484	0.134999714
26.99869139	×ÔÉí³µÁ¾	Road 1	472.6617198	91.91323471	-0.000304509	0.681244016	0.529411793	0	493.6268	989.2949	641.3994	0.27	4.2632	1531	3.236037267	0.007475246	58.49545509	0.135124501
27.01534734	×ÔÉí³µÁ¾	Road 1	473.0870865	91.9383522	-0.000304509	0.682203829	0.529411793	0	493.9592	989.3008	641.3824	0.2702	4.2631	1532	2.213077725	0.00511221	58.53231599	0.13520965
27.03203994	×ÔÉí³µÁ¾	Road 1	473.5135152	91.9654953	-0.000304509	0.681224287	0.529411793	0	494.3172	989.3066	641.3641	0.2708	4.2624	1533	2.307426196	0.005330155	58.57083294	0.135298624
27.04865117	×ÔÉí³µÁ¾	Road 1	473.9379993	91.99458847	-0.000304509	0.681932628	0.529411793	0	494.7009	989.3135	641.3445	0.2709	4.2623	1534	2.407695449	0.005561776	58.61082771	0.135391012
27.06539288	×ÔÉí³µÁ¾	Road 1	474.3659708	92.02742386	-0.000304509	0.681163609	0.529411793	0	495.1359	989.3213	641.3223	0.2709	4.2622	1535	2.575303065	0.00594895	58.65394271	0.135490608
27.0820327	×ÔÉí³µÁ¾	Road 1	474.7915523	92.07394409	-0.000304509	0.680934012	0.529411793	0	495.7502	989.332	641.2909	0.2713	4.2618	1536	3.240123558	0.007484685	58.70785777	0.135615151
27.09868865	×ÔÉí³µÁ¾	Road 1	475.2176724	92.10117645	-0.000304509	0.680994928	0.529411793	0	496.1088	989.3389	641.2727	0.2709	4.2621	1537	2.317500392	0.005353426	58.74645793	0.135704318
27.11540324	×ÔÉí³µÁ¾	Road 1	475.6454811	92.14170914	-0.000304509	0.680605412	0.529411793	0	496.6468	989.3486	641.2452	0.2709	4.2622	1538	2.947217676	0.006808073	58.79571947	0.135818112
27.13199687	×ÔÉí³µÁ¾	Road 1	476.0702834	92.1611824	-0.000304509	0.680725396	0.529411793	0	496.8261	989.3516	641.236	0.2712	4.262	1539	1.951380782	0.00450769	58.82809997	0.135892911
27.14873346	×ÔÉí³µÁ¾	Road 1	476.4989075	92.1960022	-0.000304509	0.680105329	0.529411793	0	497.3645	989.3613	641.2085	0.2711	4.2621	1540	2.674384787	0.006177829	58.87286004	0.135996307
27.16532049	×ÔÉí³µÁ¾	Road 1	476.9238613	92.2326416	-0.000304509	0.680215359	0.529411793	0	497.7235	989.3672	641.1902	0.2718	4.2616	1541	2.777667906	0.006416413	58.91893331	0.136102736
27.18203545	×ÔÉí³µÁ¾	Road 1	477.3522457	92.26367798	-0.000304509	0.679776728	0.529411793	0	498.2622	989.377	641.1627	0.2717	4.2617	1542	2.49786091	0.005770059	58.96068495	0.136199182
27.19875151	×ÔÉí³µÁ¾	Road 1	477.7807839	92.29073868	-0.000304509	0.679217398	0.529411793	0	498.6214	989.3838	641.1443	0.2714	4.2621	1543	2.308776192	0.005333273	58.9992786	0.136288334
27.21531985	×ÔÉí³µÁ¾	Road 1	478.2056678	92.31959152	-0.000304509	0.679317474	0.529411793	0	499.0065	989.3906	641.1247	0.2715	4.2618	1544	2.407189883	0.005560609	59.03916173	0.136380464
27.23202564	×ÔÉí³µÁ¾	Road 1	478.6342297	92.35253677	-0.000304509	0.679357648	0.529411793	0	499.4174	989.3975	641.1038	0.2721	4.261	1545	2.591954294	0.005987414	59.08246239	0.136480488
27.24866216	×ÔÉí³µÁ¾	Road 1	479.0611926	92.39112625	-0.000304509	0.679586291	0.529411793	0	499.9568	989.4072	641.0762	0.2721	4.2608	1546	2.870248313	0.006630274	59.13021333	0.136590793
27.26535916	×ÔÉí³µÁ¾	Road 1	479.489833	92.41813202	-0.000304509	0.679028213	0.529411793	0	500.3166	989.4141	641.0578	0.2718	4.261	1547	2.310398226	0.00533702	59.16879005	0.136679905
27.28202354	×ÔÉí³µÁ¾	Road 1	479.9178233	92.45861664	-0.000304509	0.678828537	0.529411793	0	500.8564	989.4229	641.0303	0.2729	4.2601	1548	2.959857985	0.006837272	59.21811423	0.136793844
27.29865456	×ÔÉí³µÁ¾	Road 1	480.3450816	92.48560181	-0.000304509	0.678695977	0.529411793	0	501.2164	989.4297	641.0119	0.2726	4.2604	1549	2.31600423	0.00534997	59.25663174	0.136882819
27.31536695	×ÔÉí³µÁ¾	Road 1	480.7745557	92.51257324	-0.000304509	0.678566396	0.529411793	0	501.5766	989.4365	640.9935	0.2723	4.2608	1550	2.309619888	0.005335222	59.29523102	0.136971984
27.33202509	×ÔÉí³µÁ¾	Road 1	481.2028317	92.554953	-0.000304509	0.677939177	0.529411793	0	502.1427	989.4463	640.9646	0.2729	4.2603	1551	3.054312989	0.007055463	59.34611021	0.137089515
27.34866638	×ÔÉí³µÁ¾	Road 1	481.6307988	92.58190384	-0.000304509	0.678648353	0.529411793	0	502.5031	989.4531	640.9462	0.2726	4.2606	1552	2.315652894	0.005349158	59.38464564	0.137178531
27.36539527	×ÔÉí³µÁ¾	Road 1	482.0611442	92.60885468	-0.000304509	0.677669644	0.529411793	0	502.8636	989.459	640.9278	0.2732	4.2598	1553	2.309453004	0.005334836	59.42328023	0.137267777
27.38203655	×ÔÉí³µÁ¾	Road 1	482.489396	92.64348221	-0.000304509	0.678348839	0.529411793	0	503.3273	989.4678	640.9041	0.2728	4.2602	1554	2.686201694	0.006205126	59.46798207	0.137371039
27.39867123	×ÔÉí³µÁ¾	Road 1	482.9176113	92.67234192	-0.000304509	0.677360713	0.529411793	0	503.7138	989.4746	640.8844	0.2729	4.26	1555	2.410010975	0.005567125	59.50807184	0.137463646
27.41531472	×ÔÉí³µÁ¾	Road 1	483.346267	92.71860123	-0.000304509	0.677321851	0.529411793	0	504.3325	989.4854	640.8528	0.2734	4.2594	1556	3.247664055	0.007502104	59.56212428	0.137588507
27.43204031	×ÔÉí³µÁ¾	Road 1	483.7771617	92.74537354	-0.000304509	0.677431703	0.529411793	0	504.6935	989.4922	640.8344	0.2733	4.2597	1557	2.304117444	0.005322511	59.600662	0.137677529
27.44865263	×ÔÉí³µÁ¾	Road 1	484.205263	92.7723587	-0.000304924	0.677061439	0.529411793	0	505.0547	989.498	640.8159	0.2742	4.259	1558	2.323719263	0.005367791	59.63926438	0.137766701
27.46536393	×ÔÉí³µÁ¾	Road 1	484.6360484	92.80114975	-0.000305339	0.676920831	0.529411793	0	505.4417	989.5049	640.7961	0.2746	4.2587	1559	2.403272271	0.005551559	59.67942617	0.137859474
27.48203197	×ÔÉí³µÁ¾	Road 1	485.0659226	92.84517746	-0.000305339	0.676092803	0.529411793	0	506.0354	989.5156	640.7659	0.2746	4.2586	1560	3.141031385	0.007255782	59.73178101	0.137980414
27.49866445	×ÔÉí³µÁ¾	Road 1	485.4950034	92.87192917	-0.00030617	0.677471161	0.529411793	0	506.397	989.5225	640.7474	0.2742	4.2589	1561	2.313049136	0.005343144	59.77025277	0.138069284
27.51539408	×ÔÉí³µÁ¾	Road 1	485.9267773	92.91218719	-0.00030617	0.67564249	0.529411793	0	506.9395	989.5322	640.7197	0.275	4.2589	1562	2.954431557	0.006824737	59.8196793	0.138183459
27.53207788	×ÔÉí³µÁ¾	Road 1	486.3574753	92.93713989	-0.000308254	0.676781356	0.529411793	0	507.1204	989.5352	640.7104	0.2754	4.2586	1563	2.223894345	0.005137196	59.85678231	0.138269167
27.54869424	×ÔÉí³µÁ¾	Road 1	486.7865652	92.96404953	-0.000309928	0.675084174	0.529411793	0	507.6373	989.5449	640.6841	0.275	4.259	1564	2.3239337	0.005368287	59.89539762	0.138358369
27.56532562	×ÔÉí³µÁ¾	Road 1	487.2161761	92.99280624	-0.000314563	0.676642478	0.529411793	0	508.0252	989.5518	640.6643	0.2751	4.2588	1565	2.412609393	0.005573128	59.93552266	0.138451057
27.58199843	×ÔÉí³µÁ¾	Road 1	487.6470608	93.03682022	-0.0003201	0.676432848	0.529411793	0	508.6201	989.5625	640.6339	0.2751	4.2588	1566	3.145627839	0.0072664	59.9879691	0.138572209
27.59872878	×ÔÉí³µÁ¾	Road 1	488.079504	93.05214615	-0.000330056	0.675503194	0.529411793	0	508.8271	989.5654	640.6233	0.276	4.258	1567	1.760327943	0.004066358	60.01742002	0.13864024
27.61537263	×ÔÉí³µÁ¾	Road 1	488.5099411	93.10187988	-0.000342899	0.675265253	0.529411793	0	509.5001	989.5781	640.589	0.2754	4.2585	1568	3.427673579	0.007917926	60.0744697	0.138772025
27.63200218	×ÔÉí³µÁ¾	Road 1	488.9401316	93.12852173	-0.000356992	0.674512744	0.529411793	0	509.8626	989.584	640.5704	0.2761	4.2578	1569	2.313524176	0.005344241	60.11294257	0.138860897
27.64867976	×ÔÉí³µÁ¾	Road 1	489.3716888	93.1554039	-0.000372887	0.674993634	0.529411793	0	510.2253	989.5908	640.5519	0.2759	4.2581	1570	2.321989967	0.005363797	60.15166772	0.138950352
27.66538665	×ÔÉí³µÁ¾	Road 1	489.8041998	93.19742661	-0.000391693	0.673095644	0.505882382	0	510.7953	989.6006	640.5228	0.2765	4.2576	1571	3.050252291	0.007046083	60.20262797	0.139068071
27.68205836	×ÔÉí³µÁ¾	Road 1	490.2359225	93.22391052	-0.000410615	0.670649707	0.490196079	0	511.1583	989.6074	640.5043	0.2762	4.2579	1572	2.304694219	0.005323844	60.24105116	0.139156828
27.69874253	×ÔÉí³µÁ¾	Road 1	490.6680902	93.25027771	-0.00043118	0.664157093	0.466666669	0	511.5213	989.6143	640.4858	0.276	4.2581	1573	2.298668542	0.005309924	60.27940253	0.13924542
27.7153226	×ÔÉí³µÁ¾	Road 1	491.0977488	93.29098892	-0.000456209	0.652490675	0.427450985	0	512.0919	989.624	640.4567	0.2766	4.2576	1574	3.004778335	0.006941038	60.32922196	0.139360503
27.73200457	×ÔÉí³µÁ¾	Road 1	491.5301654	93.31631241	-0.000481062	0.641323447	0.396078438	0	512.4551	989.6309	640.4381	0.2763	4.2579	1575	2.249811549	0.005197065	60.36675325	0.1394472
27.74865575	×ÔÉí³µÁ¾	Road 1	491.9618983	93.34103165	-0.000506803	0.628467441	0.36470589	0	512.8185	989.6377	640.4196	0.2761	4.2581	1576	2.223327712	0.005135887	60.40377428	0.139532719
27.7654059	×ÔÉí³µÁ¾	Road 1	492.3963173	93.36684265	-0.000532843	0.612394929	0.31764707	0	513.2079	989.6445	640.3997	0.2763	4.2579	1577	2.269360422	0.005242223	60.44178641	0.139620527
27.78198486	×ÔÉí³µÁ¾	Road 1	492.8264697	93.40440216	-0.000558518	0.583767772	0.278431386	0	513.8053	989.6553	640.3692	0.2764	4.2579	1578	2.854812332	0.006594616	60.48911625	0.139729859
27.79864741	×ÔÉí³µÁ¾	Road 1	493.2588902	93.4259491	-0.000578624	0.566068709	0.239215687	0	514.1689	989.6621	640.3507	0.2762	4.2581	1579	2.070584249	0.00478305	60.52361745	0.139809556
27.81530958	×ÔÉí³µÁ¾	Road 1	493.6913978	93.44680939	-0.000599207	0.547468007	0.20784314	0	514.5328	989.668	640.332	0.277	4.2574	1580	2.037730517	0.004707157	60.55757048	0.139887988
27.83203188	×ÔÉí³µÁ¾	Road 1	494.1256023	93.47620468	-0.000615623	0.519729495	0.168627456	0	515.0786	989.6777	640.3042	0.2771	4.2573	1581	2.446839268	0.005652199	60.59848723	0.139982506
27.84862074	×ÔÉí³µÁ¾	Road 1	494.5564565	93.50096512	-0.000626285	0.494558424	0.145098045	0	515.5726	989.6865	640.279	0.2773	4.2572	1582	2.23313512	0.005158542	60.63553241	0.14006808
27.86538995	×ÔÉí³µÁ¾	Road 1	494.9920745	93.51811752	-0.000633686	0.476639122	0.121568628	0	515.9366	989.6934	640.2604	0.2771	4.2574	1583	1.853936379	0.004282593	60.66662146	0.140139896
27.89867582	×ÔÉí³µÁ¾	Road 1	495.857113	93.55738678	-0.000637069	0.439322025	0.098039217	0	516.847	989.71	640.2139	0.277	4.2575	1584	1.98132686	0.004576865	60.73257164	0.14029224
27.91639294	×ÔÉí³µÁ¾	Road 1	496.3176198	93.571875	-0.000637747	0.421182781	0.082352944	0	517.2113	989.7168	640.1953	0.2768	4.2578	1585	1.68900207	0.003901595	60.7624959	0.140361366
27.93210904	×ÔÉí³µÁ¾	Road 1	496.7261899	93.58891754	-0.000637747	0.401165754	0.05882353	0	517.5757	989.7236	640.1767	0.2766	4.258	1586	1.904889621	0.004400295	60.79243333	0.140430521
27.94863779	×ÔÉí³µÁ¾	Road 1	497.1559541	93.60362549	-0.000637747	0.373666257	0.050980393	0	518.1223	989.7334	640.1488	0.2767	4.2578	1587	1.747781409	0.004037375	60.82132197	0.140497254
27.96537254	×ÔÉí³µÁ¾	Road 1	497.5911262	93.61472855	-0.000637747	0.362380326	0.043137256	0	518.4867	989.7393	640.1302	0.2775	4.257	1588	1.564843117	0.003614788	60.84750923	0.140557746
27.98202519	×ÔÉí³µÁ¾	Road 1	498.0242128	93.62548828	-0.000637747	0.35425967	0.027450981	0	518.8512	989.7461	640.1116	0.2773	4.2573	1589	1.550956008	0.003582708	60.87333675	0.140617408
27.99863091	×ÔÉí³µÁ¾	Road 1	498.456153	93.64145966	-0.000637747	0.338477522	0.019607844	0	519.4241	989.7568	640.0823	0.277	4.2576	1590	1.806589373	0.004173221	60.90333648	0.140686707
28.01542762	×ÔÉí³µÁ¾	Road 1	498.8931082	93.65163574	-0.000637747	0.327811629	0.011764706	0	519.8147	989.7637	640.0624	0.2772	4.2573	1591	1.518701224	0.0035082	60.92884566	0.140745633
28.03199705	×ÔÉí³µÁ¾	Road 1	499.3242099	93.66437988	-0.000637747	0.315861911	0.011764706	0	520.3356	989.7734	640.0358	0.2769	4.2576	1592	1.65103136	0.003813882	60.95620232	0.140808827
28.04869479	×ÔÉí³µÁ¾	Road 1	499.7586883	93.67275009	-0.000637747	0.305633783	0	0	520.7003	989.7803	640.0172	0.2767	4.2578	1593	1.434341204	0.003313328	60.98015256	0.140864152
28.06533277	×ÔÉí³µÁ¾	Road 1	500.1916483	93.68057098	-0.000637747	0.294974476	0	0	521.065	989.7861	639.9986	0.2775	4.2571	1594	1.409166419	0.003255174	61.00359825	0.140918312
28.08200851	×ÔÉí³µÁ¾	Road 1	500.6256295	93.68893433	-0.000637747	0.286214799	0	0	521.4558	989.7939	639.9786	0.2768	4.2578	1595	1.434739098	0.003314247	61.02752359	0.140973579
28.09872054	×ÔÉí³µÁ¾	Road 1	501.0605969	93.69794998	-0.000637747	0.228659824	0	0.011764706	522.003	989.8037	639.9507	0.2769	4.2576	1596	1.465569619	0.003385466	61.05201623	0.141030157
28.11529657	×ÔÉí³µÁ¾	Road 1	501.4920308	93.69924774	-0.000637747	0.118694298	0	0.011764706	522.498	989.8125	639.9254	0.2771	4.2574	1597	1.092167631	0.002522907	61.07012004	0.141071977
28.13195472	×ÔÉí³µÁ¾	Road 1	501.925595	93.69777145	-0.000637747	0.12464799	0	0.011764706	522.8629	989.8193	639.9068	0.2769	4.2576	1598	1.028760445	0.002376437	61.08725728	0.141111564
28.14870047	×ÔÉí³µÁ¾	Road 1	502.3614411	93.69816284	-0.000637747	0.177288845	0	0.011764706	523.2277	989.8262	639.8882	0.2767	4.2578	1599	1.047688929	0.002420161	61.10480161	0.141152092
28.16536521	×ÔÉí³µÁ¾	Road 1	502.7951917	93.70095749	-0.000637747	0.203596577	0	0.011764706	523.6185	989.833	639.8682	0.277	4.2576	1600	1.16457872	0.002690177	61.12420902	0.141196923
28.18196031	×ÔÉí³µÁ¾	Road 1	503.2271446	93.70421219	-0.000637747	0.157729059	0	0.011764706	524.2178	989.8438	639.8376	0.2775	4.2574	1601	1.18762708	0.002743419	61.1439178	0.14124245
28.19862945	×ÔÉí³µÁ¾	Road 1	503.6610251	93.70427399	-0.000637747	0.140749604	0	0.011764706	524.5826	989.8506	639.819	0.2773	4.2576	1602	1.031813182	0.002383488	61.16111724	0.141282181
28.21532461	×ÔÉí³µÁ¾	Road 1	504.0955836	93.70439758	-0.000637747	0.153483763	0	0.011764706	524.9736	989.8574	639.7991	0.2775	4.2574	1603	1.034806952	0.002390404	61.17839352	0.141322089
28.23202564	×ÔÉí³µÁ¾	Road 1	504.5303024	93.7060524	-0.000637747	0.175310582	0	0.011764706	525.4947	989.8672	639.7725	0.2772	4.2577	1604	1.109063419	0.002561936	61.19691602	0.141364876
28.24871715	×ÔÉí³µÁ¾	Road 1	504.9647793	93.70738449	-0.000637747	0.169596761	0	0.011764706	525.8596	989.874	639.7538	0.277	4.2579	1605	1.093463504	0.002525901	61.21516757	0.141407037
28.26530344	×ÔÉí³µÁ¾	Road 1	505.396523	93.70850372	-0.000637747	0.155163363	0	0.011764706	526.4329	989.8838	639.7245	0.2777	4.2572	1606	1.083490137	0.002502862	61.23313866	0.14144855
28.28196122	×ÔÉí³µÁ¾	Road 1	505.830128	93.70866165	-0.000637747	0.15133737	0	0.011764706	526.6153	989.8877	639.7153	0.277	4.2578	1607	1.036522928	0.002394368	61.25040483	0.141488435
28.2986333	×ÔÉí³µÁ¾	Road 1	506.2641087	93.70941696	-0.000637747	0.160677627	0	0.011764706	527.1104	989.8965	639.69	0.2772	4.257	1608	1.065539538	0.002461396	61.26816958	0.141529472
28.31531233	×ÔÉí³µÁ¾	Road 1	506.698278	93.71101685	-0.000634361	0.164479867	0	0.011764706	527.7098	989.9072	639.6594	0.2773	4.2568	1609	1.106544941	0.002556119	61.28662569	0.141572105
28.33213946	×ÔÉí³µÁ¾	Road 1	507.1363062	93.71186142	-0.000634361	0.159388959	0	0.011764706	528.0746	989.9141	639.6407	0.277	4.257	1610	1.069517488	0.002470585	61.30462259	0.141613678
28.34870963	×ÔÉí³µÁ¾	Road 1	507.5676489	93.712603	-0.000634361	0.155752316	0	0.011764706	528.4395	989.9209	639.6221	0.2768	4.2573	1611	1.065120013	0.002460427	61.32227181	0.141654448
28.36536374	×ÔÉí³µÁ¾	Road 1	508.0011792	93.71313858	-0.000634361	0.157681093	0	0.011764706	528.8304	989.9277	639.6022	0.277	4.257	1612	1.054924583	0.002436876	61.33984064	0.141695032
28.381979	×ÔÉí³µÁ¾	Road 1	508.433704	93.71442261	-0.000634361	0.161073983	0	0.011764706	529.4298	989.9385	639.5716	0.2771	4.2568	1613	1.091476877	0.002521312	61.35797581	0.141736924
28.39867087	×ÔÉí³µÁ¾	Road 1	508.8682269	93.71525345	-0.000634361	0.161067501	0	0.011764706	529.7947	989.9453	639.5529	0.2769	4.257	1614	1.069208421	0.002469871	61.3758229	0.141778151
28.41533561	×ÔÉí³µÁ¾	Road 1	509.3020473	93.71602249	-0.000634361	0.158519328	0	0.011764706	530.1595	989.9521	639.5343	0.2766	4.2573	1615	1.066277044	0.0024631	61.39359213	0.141819198
28.43196919	×ÔÉí³µÁ¾	Road 1	509.7350615	93.71709366	-0.000634361	0.158508584	0	0.011764706	530.7329	989.9619	639.5051	0.2772	4.2566	1616	1.081066295	0.002497263	61.41157414	0.141860736
28.44861744	×ÔÉí³µÁ¾	Road 1	510.1684609	93.71783524	-0.000634361	0.159356713	0	0.011764706	531.0978	989.9688	639.4865	0.277	4.2568	1617	1.064992745	0.002460133	61.4293044	0.141901693
28.46527302	×ÔÉí³µÁ¾	Road 1	510.6020547	93.71861115	-0.000634361	0.160209969	0	0.011764706	531.4626	989.9756	639.4678	0.2767	4.257	1618	1.066652668	0.002463968	61.44707012	0.141942732
28.48196819	×ÔÉí³µÁ¾	Road 1	511.0366843	93.71973724	-0.000634361	0.158918574	0	0.011764706	532.0099	989.9854	639.4399	0.2769	4.2575	1619	1.083560781	0.002503025	61.46516035	0.14198452
28.49870844	×ÔÉí³µÁ¾	Road 1	511.472491	93.72044449	-0.000634361	0.15850164	0	0.011764706	532.3749	989.9922	639.4213	0.2766	4.2577	1620	1.063154703	0.002455887	61.48295782	0.142025633
28.51534899	×ÔÉí³µÁ¾	Road 1	511.9057056	93.7212204	-0.000633686	0.157402247	0	0.011764706	532.7397	989.999	639.4026	0.2764	4.2579	1621	1.066708089	0.002464096	61.50070843	0.142066636
28.53200603	×ÔÉí³µÁ¾	Road 1	512.3393547	93.72231903	-0.000633686	0.157823488	0	0.011764706	533.3392	990.0098	639.372	0.2765	4.2577	1622	1.082371891	0.002500279	61.51873755	0.142108284
28.54869314	×ÔÉí³µÁ¾	Road 1	512.7737889	93.72286835	-0.000633686	0.156784609	0	0.011764706	533.7041	990.0166	639.3534	0.2762	4.2579	1623	1.055618026	0.002438478	61.53635276	0.142148975
28.56541983	×ÔÉí³µÁ¾	Road 1	513.2092589	93.72398071	-0.000633686	0.155935258	0	0.011764706	534.2514	990.0264	639.3254	0.2764	4.2578	1624	1.082828313	0.002501333	61.55446489	0.142190814
28.5820886	×ÔÉí³µÁ¾	Road 1	513.6432226	93.72431717	-0.000633686	0.155086294	0	0.011764706	534.6163	990.0332	639.3068	0.2761	4.258	1625	1.045315848	0.00241468	61.57188902	0.142231064
28.59863128	×ÔÉí³µÁ¾	Road 1	514.0739061	93.72486649	-0.000633686	0.155075878	0	0.011764706	534.9812	990.04	639.2882	0.2759	4.2582	1626	1.055866912	0.002439053	61.58935589	0.142271412
28.61527843	×ÔÉí³µÁ¾	Road 1	514.5073124	93.7255394	-0.000633686	0.155266389	0	0.011764706	535.3722	990.0469	639.2682	0.2761	4.2579	1627	1.061717139	0.002452567	61.60703045	0.14231224
28.63195746	×ÔÉí³µÁ¾	Road 1	514.941551	93.72597198	-0.000633686	0.154227749	0	0.011764706	535.7631	990.0537	639.2483	0.2763	4.2576	1628	1.049987269	0.002425471	61.62454323	0.142352695
28.64869112	×ÔÉí³µÁ¾	Road 1	515.3772154	93.72677536	-0.000633686	0.153138787	0	0.011764706	536.3887	990.0654	639.2163	0.2759	4.258	1629	1.067872855	0.002466786	61.64241265	0.142393973
28.66533314	×ÔÉí³µÁ¾	Road 1	515.8104959	93.72722168	-0.000632336	0.152949184	0	0.011764706	536.7797	990.0723	639.1964	0.2762	4.2578	1630	1.050712399	0.002427146	61.65989862	0.142434366
28.68195536	×ÔÉí³µÁ¾	Road 1	516.2432625	93.72753067	-0.000632336	0.153176978	0	0.011764706	537.1446	990.0791	639.1777	0.276	4.258	1631	1.044048803	0.002411753	61.67725303	0.142474454
28.698619	×ÔÉí³µÁ¾	Road 1	516.6771101	93.72808685	-0.000632336	0.152088672	0	0.011764706	537.5356	990.0859	639.1578	0.2763	4.2578	1632	1.056031404	0.002439433	61.69485036	0.142515104
28.71531527	×ÔÉí³µÁ¾	Road 1	517.1118085	93.72840271	-0.000632336	0.151049331	0	0.011764706	537.9526	990.0938	639.1365	0.276	4.2581	1633	1.044322067	0.002412384	61.71228664	0.142555382
28.73381499	×ÔÉí³µÁ¾	Road 1	517.5934647	93.72909622	-0.000632336	0.150998399	0	0.011764706	538.4739	990.1035	639.1099	0.2757	4.2584	1634	1.059369173	0.002447143	61.73188467	0.142600654
28.7494596	×ÔÉí³µÁ¾	Road 1	518.0007877	93.72953568	-0.000630988	0.150150016	0	0.011764706	539.0213	990.1133	639.082	0.2759	4.2583	1635	1.051760365	0.002429566	61.74833906	0.142638663
28.76532709	×ÔÉí³µÁ¾	Road 1	518.4139139	93.72970734	-0.000628969	0.150388867	0	0.011764706	539.3862	990.1201	639.0634	0.2757	4.2585	1636	1.037771868	0.002397253	61.76480589	0.142676702
28.78265493	×ÔÉí³µÁ¾	Road 1	518.8650634	93.72997513	-0.000626285	0.150197148	0	0.011764706	539.9075	990.1299	639.0367	0.2754	4.2589	1637	1.041529167	0.002405932	61.78285334	0.142718391
28.79866427	×ÔÉí³µÁ¾	Road 1	519.2818864	93.73046265	-0.000624276	0.149290249	0	0.011764706	540.2985	990.1367	639.0168	0.2757	4.2586	1638	1.053681359	0.002434004	61.79972208	0.142757358
28.81531875	×ÔÉí³µÁ¾	Road 1	519.7155063	93.73042831	-0.000623608	0.148918465	0	0.011764706	540.6635	990.1436	638.9982	0.2755	4.2589	1639	1.029014442	0.002377023	61.81685978	0.142796946
28.83199999	×ÔÉí³µÁ¾	Road 1	520.1498239	93.73066177	-0.000623608	0.148252741	0	0.011764706	541.0283	990.1494	638.9795	0.2762	4.2582	1640	1.040352717	0.002403215	61.83421415	0.142837035
28.84862147	×ÔÉí³µÁ¾	Road 1	520.5825876	93.7310463	-0.00062294	0.148678631	0	0.011764706	541.6018	990.1602	638.9502	0.2759	4.2585	1641	1.047758244	0.002420322	61.85162946	0.142877264
28.86529245	×ÔÉí³µÁ¾	Road 1	521.0166406	93.73121109	-0.000621605	0.147398949	0	0.011764706	541.9667	990.167	638.9316	0.2757	4.2588	1642	1.037027713	0.002395534	61.86891772	0.1429172
28.88202024	×ÔÉí³µÁ¾	Road 1	521.4521736	93.73138275	-0.000621605	0.148006022	0	0.011764706	542.3317	990.1738	638.913	0.2755	4.259	1643	1.037334366	0.002396242	61.88627003	0.142957284
28.89867472	×ÔÉí³µÁ¾	Road 1	521.8857978	93.73138275	-0.000620272	0.147221819	0	0.011764706	542.6966	990.1797	638.8943	0.2763	4.2583	1644	1.029021866	0.002377041	61.90340785	0.142996872
28.91533249	×ÔÉí³µÁ¾	Road 1	522.3195097	93.73174667	-0.000620272	0.146979034	0	0.011764706	543.3221	990.1914	638.8624	0.2759	4.2587	1645	1.046721314	0.002417926	61.9208439	0.143037149
28.93198514	×ÔÉí³µÁ¾	Road 1	522.7530888	93.73195267	-0.000620272	0.145888329	0	0.011764706	543.6871	990.1982	638.8438	0.2757	4.2589	1646	1.03904637	0.002400197	61.93814677	0.143077119
28.94863962	×ÔÉí³µÁ¾	Road 1	523.1867163	93.73207626	-0.000618277	0.146304742	0	0.011764706	544.052	990.2051	638.8252	0.2755	4.2592	1647	1.035038651	0.002390939	61.9553848	0.143116939
28.965271	×ÔÉí³µÁ¾	Road 1	523.6197424	93.73205566	-0.000618277	0.146550804	0	0.011764706	544.6255	990.2148	638.7958	0.2762	4.2586	1648	1.0290271	0.002377053	61.97249895	0.143156473
28.98196434	×ÔÉí³µÁ¾	Road 1	524.0543824	93.73226852	-0.000618277	0.145889014	0	0.011764706	544.9904	990.2217	638.7772	0.276	4.2588	1649	1.039357626	0.002400916	61.98984929	0.143196552
28.99863751	×ÔÉí³µÁ¾	Road 1	524.4884978	93.73232346	-0.000618277	0.145884424	0	0.011764706	545.3553	990.2285	638.7587	0.2758	4.2591	1650	1.031697924	0.002383222	62.00705097	0.143236288
29.03204434	×ÔÉí³µÁ¾	Road 1	525.3583031	93.73230972	-0.000618277	0.145684943	0	0.011764706	545.9288	990.2393	638.7294	0.2754	4.2594	1651	1.029029076	0.002377057	62.04142757	0.143315698
29.04866949	×ÔÉí³µÁ¾	Road 1	525.791169	93.73250885	-0.000618277	0.145880803	0	0.011764706	546.8151	990.2549	638.6841	0.2755	4.2589	1652	1.038732768	0.002399473	62.05869666	0.143355589
29.06528255	×ÔÉí³µÁ¾	Road 1	526.2237197	93.73244705	-0.000618277	0.145256221	0	0.011764706	547.18	990.2617	638.6655	0.2753	4.2591	1653	1.029030144	0.00237706	62.075792	0.14339508
29.08196525	×ÔÉí³µÁ¾	Road 1	526.6580839	93.73246078	-0.000618277	0.144852847	0	0.011764706	547.5449	990.2686	638.6469	0.2751	4.2592	1654	1.029697056	0.0023786	62.09297013	0.143434761
29.09859774	×ÔÉí³µÁ¾	Road 1	527.0911407	93.73251572	-0.000618277	0.144852281	0	0.011764706	548.1183	990.2783	638.6176	0.2758	4.2585	1655	1.031705954	0.002383241	62.11012996	0.1434744
29.11526248	×ÔÉí³µÁ¾	Road 1	527.525038	93.73263931	-0.000618277	0.14503175	0	0.011764706	548.4833	990.2852	638.599	0.2756	4.2586	1656	1.035039364	0.002390941	62.12737863	0.143514245
29.13198917	×ÔÉí³µÁ¾	Road 1	527.9605479	93.73256378	-0.000618277	0.14527607	0	0.011764706	548.8482	990.292	638.5803	0.2754	4.2589	1657	1.029031052	0.002377062	62.14459091	0.143554005
29.14873016	×ÔÉí³µÁ¾	Road 1	528.39643	93.73255692	-0.000618277	0.144188255	0	0.011764706	549.4217	990.3018	638.5511	0.276	4.2583	1658	1.029030998	0.002377062	62.1618179	0.143593799
29.16534835	×ÔÉí³µÁ¾	Road 1	528.8291192	93.73350449	-0.000618277	0.191735461	0	0	549.7606	990.3086	638.5337	0.2753	4.259	1659	1.075226845	0.002483774	62.17968623	0.143635075
29.1819757	×ÔÉí³µÁ¾	Road 1	529.2620878	93.74233475	-0.000618277	0.307590663	0	0	550.308	990.3184	638.5059	0.2756	4.2588	1660	1.459315316	0.003371018	62.20395078	0.143691126
29.1986573	×ÔÉí³µÁ¾	Road 1	529.6965061	93.75033417	-0.000618277	0.291652828	0	0	550.673	990.3252	638.4872	0.2754	4.2591	1661	1.417666581	0.00327481	62.22759973	0.143745755
29.21530262	×ÔÉí³µÁ¾	Road 1	530.1300066	93.75622559	-0.000618277	0.234746918	0	0	551.038	990.332	638.4685	0.2752	4.2593	1662	1.315980884	0.003039916	62.24950465	0.143796356
29.23193364	×ÔÉí³µÁ¾	Road 1	530.5631593	93.76152649	-0.000618277	0.210091919	0.011764706	0	551.5855	990.3418	638.4406	0.2753	4.2591	1663	1.287515894	0.002974162	62.27091735	0.143845819
29.24861561	×ÔÉí³µÁ¾	Road 1	530.9976621	93.7664978	-0.000618277	0.236213669	0.011764706	0	551.9766	990.3486	638.4206	0.2755	4.2588	1664	1.270770446	0.00293548	62.2921163	0.143894789
29.26537126	×ÔÉí³µÁ¾	Road 1	531.4341126	93.77267761	-0.000618277	0.273530811	0.019607844	0	552.3417	990.3555	638.402	0.2752	4.2589	1665	1.328217565	0.003068183	62.31437145	0.143946198
29.28193263	×ÔÉí³µÁ¾	Road 1	531.8655451	93.78189926	-0.000618277	0.251573056	0.027450981	0	552.8894	990.3652	638.374	0.2753	4.2586	1666	1.480670719	0.003420349	62.33889339	0.144002844
29.29866922	×ÔÉí³µÁ¾	Road 1	532.3015674	93.78734436	-0.000618277	0.238586381	0.027450981	0	553.2806	990.3721	638.3541	0.2755	4.2584	1667	1.293140964	0.002987156	62.36053616	0.144052839
29.31528704	×ÔÉí³µÁ¾	Road 1	532.7345196	93.79254913	-0.000618277	0.246206746	0.035294119	0	553.6718	990.3799	638.3341	0.2748	4.2591	1668	1.283359179	0.00296456	62.38186279	0.144102103
29.33205185	×ÔÉí³µÁ¾	Road 1	533.1713403	93.80090561	-0.000618277	0.264238834	0.043137256	0	554.2196	990.3896	638.3062	0.2749	4.259	1669	1.433603359	0.003311624	62.40589688	0.144157622
29.34864292	×ÔÉí³µÁ¾	Road 1	533.6036616	93.80692062	-0.000618277	0.262512952	0.050980393	0	554.5848	990.3965	638.2875	0.2747	4.2592	1670	1.323507237	0.003057302	62.42785528	0.144208346
29.36526587	×ÔÉí³µÁ¾	Road 1	534.036841	93.81279144	-0.000618277	0.256298751	0.05882353	0	554.95	990.4023	638.2688	0.2754	4.2585	1671	1.315975228	0.003039903	62.44973068	0.144258878
29.3985752	×ÔÉí³µÁ¾	Road 1	534.9049827	93.82688828	-0.000618277	0.263022661	0.074509807	0	555.8632	990.4189	638.2222	0.2753	4.2585	1672	1.372898426	0.003171395	62.49546099	0.144364515
29.41532315	×ÔÉí³µÁ¾	Road 1	535.3415148	93.83329468	-0.000618277	0.266629666	0.082352944	0	556.2546	990.4268	638.2023	0.2746	4.2592	1673	1.339990177	0.003095377	62.51790308	0.144416356
29.43191238	×ÔÉí³µÁ¾	Road 1	535.7739525	93.84254379	-0.000618277	0.26379329	0.105882354	0	556.8026	990.4365	638.1743	0.2749	4.259	1674	1.482018505	0.003423463	62.54248863	0.144473149
29.44868049	×ÔÉí³µÁ¾	Road 1	536.2110801	93.84835281	-0.000618277	0.261455148	0.113725491	0	557.168	990.4434	638.1556	0.2749	4.2592	1675	1.310891985	0.00302816	62.56446981	0.144523925
29.46533607	×ÔÉí³µÁ¾	Road 1	536.6453156	93.85731354	-0.000618277	0.262511849	0.121568628	0	557.7161	990.4531	638.1276	0.2754	4.259	1676	1.466360175	0.003387292	62.58889289	0.144580343
29.48194949	×ÔÉí³µÁ¾	Road 1	537.0784809	93.86354828	-0.000618277	0.266718447	0.137254909	0	558.1076	990.46	638.1077	0.2758	4.2587	1677	1.334456962	0.003082596	62.61106279	0.144631555
29.4986025	×ÔÉí³µÁ¾	Road 1	537.5127071	93.86976929	-0.000618277	0.270084083	0.145098045	0	558.4731	990.4668	638.089	0.2755	4.2589	1678	1.333132901	0.003079537	62.63326347	0.144682839
29.51534862	×ÔÉí³µÁ¾	Road 1	537.9494077	93.87980118	-0.000618277	0.276125163	0.152941182	0	559.0213	990.4766	638.061	0.2757	4.2587	1679	1.516169929	0.003502353	62.65865343	0.144741489
29.53197414	×ÔÉí³µÁ¾	Road 1	538.3829955	93.88672943	-0.000618277	0.289290279	0.160784319	0	559.3868	990.4834	638.0424	0.2755	4.2589	1680	1.368333644	0.003160851	62.68140269	0.14479404
29.54867554	×ÔÉí³µÁ¾	Road 1	538.8185977	93.89441299	-0.000618277	0.299198389	0.168627456	0	559.7524	990.4902	638.0237	0.2752	4.2591	1681	1.403578585	0.003242267	62.70484441	0.144848191
29.56533698	×ÔÉí³µÁ¾	Road 1	539.2532143	93.90661469	-0.000618277	0.315090209	0.176470593	0	560.3007	990.5	637.9957	0.2754	4.2589	1682	1.624661043	0.003752967	62.73191361	0.14491072
29.5819823	×ÔÉí³µÁ¾	Road 1	539.6874511	93.91547928	-0.000618277	0.325657487	0.184313729	0	560.6664	990.5068	637.9771	0.2751	4.2591	1683	1.462665425	0.003378757	62.75626014	0.144966961
29.59858143	×ÔÉí³µÁ¾	Road 1	540.1205257	93.92472839	-0.000618277	0.334766269	0.192156866	0	561.032	990.5127	637.9584	0.2759	4.2583	1684	1.482783888	0.003425231	62.78087306	0.145023817
29.61531948	×ÔÉí³µÁ¾	Road 1	540.5572704	93.93450623	-0.000618277	0.338300765	0.192156866	0	561.3977	990.5195	637.9397	0.2757	4.2585	1685	1.504792593	0.003476071	62.80606036	0.145081999
29.63197286	×ÔÉí³µÁ¾	Road 1	540.9918609	93.94645386	-0.000618277	0.341638029	0.200000003	0	561.8419	990.5283	637.9171	0.2749	4.2593	1686	1.613126686	0.003726323	62.83292437	0.145144055
29.64869808	×ÔÉí³µÁ¾	Road 1	541.4283936	93.96092834	-0.000618277	0.347282201	0.200000003	0	562.2338	990.5352	637.897	0.2751	4.259	1687	1.733488064	0.004004357	62.86191734	0.145211029
29.66526312	×ÔÉí³µÁ¾	Road 1	541.8608047	93.97381668	-0.000618277	0.356970221	0.20784314	0	562.8087	990.5459	637.8677	0.2748	4.2593	1688	1.662729106	0.003840904	62.88946052	0.145274654
29.6819385	×ÔÉí³µÁ¾	Road 1	542.2961456	93.98454895	-0.000618277	0.362242699	0.20784314	0	563.1746	990.5518	637.849	0.2755	4.2585	1689	1.553700812	0.003589049	62.91536905	0.145334503
29.69864612	×ÔÉí³µÁ¾	Road 1	542.732414	94.00293732	-0.000618277	0.368286073	0.20784314	0	563.7758	990.5625	637.8182	0.2757	4.2583	1690	1.925139663	0.004447073	62.94753357	0.145408803
29.71529584	×ÔÉí³µÁ¾	Road 1	543.1672183	94.01335373	-0.000618277	0.371024281	0.20784314	0	564.1156	990.5693	637.8009	0.275	4.259	1691	1.539479626	0.003556198	62.97316547	0.145468012
29.73191549	×ÔÉí³µÁ¾	Road 1	543.6012907	94.02484131	-0.000621605	0.374360472	0.20784314	0	564.4816	990.5762	637.7823	0.2747	4.2592	1692	1.592915311	0.003679634	62.99963917	0.145529166
29.74858024	×ÔÉí³µÁ¾	Road 1	544.0365986	94.03736572	-0.00062294	0.378546417	0.20784314	0	564.8739	990.583	637.7622	0.275	4.2589	1693	1.64212346	0.003793305	63.02700474	0.145592381
29.76523728	×ÔÉí³µÁ¾	Road 1	544.4717958	94.05691452	-0.000623608	0.380754203	0.20784314	0	565.4754	990.5938	637.7315	0.2751	4.2588	1694	1.985405171	0.004586286	63.06007572	0.145668775
29.78195737	×ÔÉí³µÁ¾	Road 1	544.908699	94.06953506	-0.000625615	0.384137899	0.20784314	0	565.8678	990.6006	637.7115	0.2754	4.2585	1695	1.645233509	0.003800489	63.08758418	0.145732319
29.798687	×ÔÉí³µÁ¾	Road 1	545.3459082	94.08181915	-0.000629642	0.384880304	0.20784314	0	566.2341	990.6074	637.6927	0.2752	4.2588	1696	1.628710121	0.00376232	63.11483188	0.145795262
29.81528649	×ÔÉí³µÁ¾	Road 1	545.7797842	94.09732361	-0.000634361	0.386747032	0.20784314	0	566.6266	990.6143	637.6727	0.2754	4.2585	1697	1.791340954	0.004137998	63.14456724	0.14586395
29.83193584	×ÔÉí³µÁ¾	Road 1	546.2150401	94.11305466	-0.000640464	0.388786465	0.20784314	0	567.1761	990.625	637.6447	0.2746	4.2593	1698	1.800389907	0.004158901	63.17454255	0.145933193
29.84859142	×ÔÉí³µÁ¾	Road 1	546.6505197	94.12621765	-0.000647976	0.389146268	0.20784314	0	567.5687	990.6318	637.6246	0.2749	4.2591	1699	1.674911115	0.003869045	63.20243917	0.145997634
29.86530931	×ÔÉí³µÁ¾	Road 1	547.0877191	94.14572525	-0.000656238	0.390506476	0.20784314	0	568.1447	990.6426	637.5953	0.2746	4.2594	1700	1.981517049	0.004577304	63.23556596	0.146074157
29.88199018	×ÔÉí³µÁ¾	Road 1	547.5240073	94.15798874	-0.000663176	0.390687734	0.20784314	0	568.5112	990.6484	637.5765	0.2754	4.2586	1701	1.630527273	0.003766518	63.26276457	0.146136986
29.89859407	×ÔÉí³µÁ¾	Road 1	547.958344	94.17141266	-0.000672268	0.391226768	0.20784314	0	568.9041	990.6563	637.5565	0.2747	4.2593	1702	1.690360469	0.003904733	63.29083114	0.14620182
29.91592228	×ÔÉí³µÁ¾	Road 1	548.4117177	94.19007568	-0.000682153	0.391986221	0.215686277	0	569.454	990.666	637.5284	0.2749	4.2592	1703	1.909193582	0.004410237	63.32391404	0.146278241
29.93198844	×ÔÉí³µÁ¾	Road 1	548.8321305	94.20336914	-0.000690702	0.393856049	0.223529413	0	569.847	990.6729	637.5084	0.2752	4.2589	1704	1.706250513	0.003941439	63.35132693	0.146341565
29.94868507	×ÔÉí³µÁ¾	Road 1	549.2691044	94.21697845	-0.000700044	0.396101385	0.223529413	0	570.24	990.6807	637.4883	0.2745	4.2596	1705	1.696416737	0.003918723	63.37965138	0.146406995
29.96530326	×ÔÉí³µÁ¾	Road 1	549.7041089	94.23505096	-0.000709469	0.398788959	0.223529413	0	570.764	990.6895	637.4615	0.2753	4.2589	1706	1.91850053	0.004431736	63.41153338	0.146480642
29.98193611	×ÔÉí³µÁ¾	Road 1	550.1395568	94.2479805	-0.000718245	0.39976725	0.239215687	0	571.131	990.6963	637.4429	0.2751	4.2591	1707	1.666138615	0.00384878	63.43924602	0.146544658
29.99861405	×ÔÉí³µÁ¾	Road 1	550.5762535	94.26272278	-0.000727092	0.40181464	0.239215687	0	571.5504	990.7041	637.4214	0.2749	4.2594	1708	1.753169114	0.004049821	63.46848527	0.146612201
30.01531142	×ÔÉí³µÁ¾	Road 1	551.0135449	94.28128967	-0.000733775	0.407049596	0.247058824	0	572.0747	990.7139	637.3947	0.2747	4.2597	1709	1.939213148	0.004479582	63.50086502	0.146686998
30.0319593	×ÔÉí³µÁ¾	Road 1	551.4496016	94.29454193	-0.00073975	0.409955978	0.254901975	0	572.4418	990.7197	637.3759	0.2755	4.2589	1710	1.682036419	0.003885504	63.52886736	0.146751684
30.04895797	×ÔÉí³µÁ¾	Road 1	551.8949101	94.30797272	-0.000745757	0.412863165	0.262745112	0	572.8089	990.7266	637.3572	0.2753	4.2591	1711	1.677404149	0.003874804	63.55738101	0.14681755
30.06529575	×ÔÉí³µÁ¾	Road 1	552.3230023	94.32936172	-0.000751796	0.41534999	0.262745112	0	573.386	990.7373	637.3278	0.2751	4.2594	1712	2.100780927	0.004852804	63.59170309	0.146896834
30.08193226	×ÔÉí³µÁ¾	Road 1	552.7589863	94.3432045	-0.000760154	0.421183854	0.270588249	0	573.7532	990.7441	637.309	0.2749	4.2596	1713	1.712128362	0.003955017	63.62018694	0.146962632
30.09858894	×ÔÉí³µÁ¾	Road 1	553.1955912	94.36322021	-0.000764738	0.425329357	0.278431386	0	574.278	990.7539	637.2822	0.2747	4.2599	1714	2.013770063	0.004651809	63.65372966	0.147040116
30.11527934	×ÔÉí³µÁ¾	Road 1	553.6331461	94.37745438	-0.000767038	0.429504991	0.278431386	0	574.6454	990.7598	637.2634	0.2755	4.2591	1715	1.729573298	0.003995314	63.68259694	0.147106799
30.13229708	×ÔÉí³µÁ¾	Road 1	554.0793803	94.3981636	-0.000773191	0.431741923	0.278431386	0	575.1704	990.7695	637.2366	0.2753	4.2593	1716	2.026846333	0.004682015	63.71708927	0.147186476
30.1485993	×ÔÉí³µÁ¾	Road 1	554.5069226	94.41368179	-0.000775507	0.435687959	0.278431386	0	575.5642	990.7773	637.2166	0.2746	4.26	1717	1.810945081	0.004183283	63.74661169	0.147254673
30.16524315	×ÔÉí³µÁ¾	Road 1	554.9434972	94.42938538	-0.00077628	0.436885953	0.278431386	0	575.9581	990.7842	637.1964	0.2749	4.2596	1718	1.804341458	0.004168029	63.77664288	0.147324045
30.18189359	×ÔÉí³µÁ¾	Road 1	555.3803081	94.44306335	-0.000779378	0.438513964	0.278431386	0	576.2995	990.79	637.179	0.2753	4.2593	1719	1.70497825	0.0039385	63.80503153	0.147389623
30.19864264	×ÔÉí³µÁ¾	Road 1	555.8198141	94.4663475	-0.000779378	0.440100968	0.278431386	0	576.8774	990.8008	637.1495	0.275	4.2595	1720	2.169505549	0.005011558	63.84136868	0.147473562
30.21524764	×ÔÉí³µÁ¾	Road 1	556.2556037	94.48017654	-0.000779378	0.441299379	0.278431386	0	577.2189	990.8066	637.1321	0.2754	4.2592	1721	1.714793142	0.003961172	63.86984281	0.147539337
30.23188965	×ÔÉí³µÁ¾	Road 1	556.692434	94.49509735	-0.000779378	0.441646576	0.278431386	0	577.5868	990.8135	637.1133	0.2752	4.2593	1722	1.767068582	0.004081928	63.8992504	0.147607268
30.24860461	×ÔÉí³µÁ¾	Road 1	557.1312533	94.51111679	-0.000779378	0.442846507	0.278431386	0	577.981	990.8213	637.0931	0.2749	4.26	1723	1.817796815	0.004199111	63.9296348	0.147677456
30.26527742	×ÔÉí³µÁ¾	Road 1	557.56908	94.5357399	-0.000779378	0.44233647	0.278431386	0	578.4016	990.8281	637.0717	0.2757	4.2592	1724	2.241664967	0.005178246	63.96700965	0.147763792
30.28194986	×ÔÉí³µÁ¾	Road 1	558.0069716	94.551828	-0.000779378	0.443064153	0.278431386	0	578.98	990.8389	637.0422	0.2755	4.2594	1725	1.823812358	0.004213007	63.99741705	0.147834033
30.29866079	×ÔÉí³µÁ¾	Road 1	558.4459486	94.56790924	-0.000779378	0.442985594	0.278431386	0	579.3745	990.8467	637.022	0.2748	4.2601	1726	1.821919625	0.004208634	64.02786302	0.147904364
30.31527678	×ÔÉí³µÁ¾	Road 1	558.8825061	94.58400421	-0.000779378	0.444185406	0.278431386	0	579.769	990.8535	637.0019	0.2752	4.2597	1727	1.827348044	0.004221174	64.05822621	0.147974503
30.33187811	×ÔÉí³µÁ¾	Road 1	559.3187874	94.60763855	-0.000779378	0.443665206	0.278431386	0	580.3477	990.8643	636.9724	0.2749	4.26	1728	2.199656587	0.005081207	64.09474343	0.148058857
30.34855568	×ÔÉí³µÁ¾	Road 1	559.7571419	94.62267609	-0.000779378	0.443564504	0.278431386	0	580.7161	990.8711	636.9536	0.2748	4.2601	1729	1.773208963	0.004096113	64.12431625	0.148127171
30.36527027	×ÔÉí³µÁ¾	Road 1	560.1965394	94.63771362	-0.000779378	0.443913579	0.278431386	0	581.0845	990.877	636.9348	0.2756	4.2593	1730	1.771809846	0.004092881	64.15393134	0.148195581
30.38193355	×ÔÉí³µÁ¾	Road 1	560.6346675	94.65492783	-0.000779378	0.444672197	0.278431386	0	581.5056	990.8848	636.9133	0.2755	4.2594	1731	1.881178877	0.004345523	64.18527794	0.148267992
30.39857153	×ÔÉí³µÁ¾	Road 1	561.0722151	94.67319946	-0.000779378	0.44373408	0.278431386	0	581.9532	990.8936	636.8904	0.2748	4.2601	1732	1.934757835	0.004469291	64.21746841	0.148342352
30.41523444	×ÔÉí³µÁ¾	Road 1	561.5105027	94.69148483	-0.000779378	0.444065094	0.278431386	0	582.4008	990.9014	636.8676	0.2751	4.2598	1733	1.93440371	0.004468473	64.2497012	0.14841681
30.43195233	×ÔÉí³µÁ¾	Road 1	561.9503215	94.70976334	-0.000779378	0.443972349	0.286274523	0	582.8485	990.9092	636.8447	0.2754	4.2595	1734	1.931429397	0.004461602	64.28199063	0.148491398
30.44866106	×ÔÉí³µÁ¾	Road 1	562.3899742	94.7259201	-0.000779378	0.444743365	0.286274523	0	583.2436	990.917	636.8245	0.2748	4.2601	1735	1.828266252	0.004223295	64.31253864	0.148561964
30.46664797	×ÔÉí³µÁ¾	Road 1	562.8633836	94.75077667	-0.000779378	0.446322501	0.286274523	0	583.8495	990.9277	636.7936	0.2751	4.2598	1736	2.16836935	0.005008933	64.3515409	0.148652059
30.48202574	×ÔÉí³µÁ¾	Road 1	563.2681813	94.76485977	-0.000779378	0.446250528	0.286274523	0	584.1921	990.9336	636.7761	0.2754	4.2595	1737	1.787011449	0.004127996	64.37902114	0.148715539
30.49856035	×ÔÉí³µÁ¾	Road 1	563.703536	94.78764267	-0.000779378	0.447452039	0.286274523	0	584.7456	990.9443	636.7479	0.2747	4.2602	1738	2.165804437	0.005003008	64.41483188	0.148798262
30.51529144	×ÔÉí³µÁ¾	Road 1	564.1441396	94.80392303	-0.000779378	0.446903318	0.286274523	0	585.1411	990.9512	636.7277	0.275	4.2598	1739	1.834517367	0.004237735	64.44552536	0.148869164
30.53190376	×ÔÉí³µÁ¾	Road 1	564.5817159	94.82566223	-0.000779378	0.448069811	0.286274523	0	585.6684	990.9609	636.7007	0.2748	4.26	1740	2.109798107	0.004873634	64.48057401	0.148950126
30.5485993	×ÔÉí³µÁ¾	Road 1	565.0215193	94.833284	-0.000779378	0.448452294	0.294117659	0	585.853	990.9639	636.6913	0.2752	4.2596	1741	1.411712818	0.003261057	64.50414331	0.149004571
30.56522775	×ÔÉí³µÁ¾	Road 1	565.4596513	94.85399323	-0.000779378	0.448349565	0.301960796	0	586.3541	990.9736	636.6657	0.2745	4.2602	1742	2.058535969	0.004755218	64.53837357	0.149083643
30.58197387	×ÔÉí³µÁ¾	Road 1	565.9009957	94.87808762	-0.000779378	0.450775564	0.309803933	0	586.9346	990.9844	636.6361	0.2742	4.2604	1743	2.21751581	0.005122462	64.57550835	0.149169424
30.59860855	×ÔÉí³µÁ¾	Road 1	566.3394746	94.89353714	-0.000779378	0.453246623	0.309803933	0	587.304	990.9902	636.6172	0.275	4.2596	1744	1.799639617	0.004157168	64.60544479	0.149238577
30.61527659	×ÔÉí³µÁ¾	Road 1	566.778941	94.91691742	-0.00077628	0.456529528	0.325490206	0	587.8582	991.001	636.5889	0.2743	4.2602	1745	2.188694119	0.005055883	64.64192604	0.149322849
30.63189002	×ÔÉí³µÁ¾	Road 1	567.21704	94.93265533	-0.00077628	0.458994299	0.333333343	0	588.2278	991.0078	636.5701	0.2741	4.2604	1746	1.815471857	0.00419374	64.67208724	0.149392522
30.64861341	×ÔÉí³µÁ¾	Road 1	567.658118	94.94968414	-0.00077628	0.463151425	0.34117648	0	588.6238	991.0146	636.5499	0.2745	4.26	1747	1.873961106	0.00432885	64.70342623	0.149464915
30.6652349	×ÔÉí³µÁ¾	Road 1	568.0966199	94.97386093	-0.00077628	0.4681274	0.349019617	0	589.1784	991.0244	636.5215	0.2747	4.2597	1748	2.232372753	0.005156781	64.74053158	0.149550628
30.68271156	×ÔÉí³µÁ¾	Road 1	568.5577685	94.99151459	-0.00077628	0.472049028	0.356862754	0	589.5746	991.0322	636.5013	0.2741	4.2603	1749	1.867973829	0.00431502	64.77317753	0.14962604
30.70002254	×ÔÉí³µÁ¾	Road 1	569.0146587	95.01510773	-0.00077628	0.477260917	0.36470589	0	590.103	991.042	636.4744	0.2738	4.2605	1750	2.157969656	0.00498491	64.81053411	0.149712334
30.71528044	×ÔÉí³µÁ¾	Road 1	569.4174382	95.0331459	-0.00077628	0.482267797	0.36470589	0	590.4994	991.0488	636.4541	0.2742	4.2601	1751	2.009980311	0.004643055	64.84120218	0.149783177
30.731899	×ÔÉí³µÁ¾	Road 1	569.8562209	95.05144501	-0.00077628	0.48642537	0.380392164	0	590.8959	991.0557	636.4339	0.2745	4.2597	1752	1.943701285	0.00448995	64.87350369	0.149857794
30.74862239	×ÔÉí³µÁ¾	Road 1	570.2978574	95.0699295	-0.00077628	0.490565598	0.380392164	0	591.2924	991.0635	636.4136	0.2738	4.2604	1753	1.947456643	0.004498625	64.90607177	0.149933026
30.76535385	×ÔÉí³µÁ¾	Road 1	570.7398235	95.09626923	-0.00077628	0.495578378	0.380392164	0	591.6626	991.0703	636.3947	0.2737	4.2605	1754	2.333209367	0.005389714	64.94510976	0.150023204
30.78190899	×ÔÉí³µÁ¾	Road 1	571.1771852	95.10652771	-0.00077628	0.498638123	0.388235301	0	592.0593	991.0771	636.3745	0.274	4.2601	1755	1.548989903	0.003578167	64.97075351	0.150082441
30.79863714	×ÔÉí³µÁ¾	Road 1	571.6192602	95.1371933	-0.00077628	0.505517721	0.396078438	0	592.6942	991.0889	636.3421	0.2738	4.2603	1756	2.546898087	0.005883335	65.01335842	0.150180858
30.81525863	×ÔÉí³µÁ¾	Road 1	572.0586003	95.15540314	-0.00077628	0.509241641	0.403921574	0	593.0646	991.0957	636.3232	0.2736	4.2604	1757	1.940923976	0.004483534	65.04561946	0.150255381
30.83199265	×ÔÉí³µÁ¾	Road 1	572.5010067	95.17515793	-0.00077628	0.514668941	0.411764711	0	593.4615	991.1025	636.3029	0.274	4.26	1758	2.011127036	0.004645703	65.07927371	0.150333122
30.84858042	×ÔÉí³µÁ¾	Road 1	572.9396265	95.19252319	-0.00077628	0.519256949	0.419607848	0	593.8057	991.1084	636.2853	0.2743	4.2596	1759	1.901518378	0.004392507	65.11081565	0.150405984
30.8652327	×ÔÉí³µÁ¾	Road 1	573.3800839	95.22099838	-0.00077628	0.526321232	0.419607848	0	594.3617	991.1191	636.257	0.2736	4.2603	1760	2.447541819	0.005653822	65.1515728	0.150500133
30.88193043	×ÔÉí³µÁ¾	Road 1	573.8218329	95.24026566	-0.00077628	0.530463934	0.419607848	0	594.7324	991.126	636.238	0.2735	4.2604	1761	1.990383287	0.004597785	65.18480769	0.150576906
30.89852919	×ÔÉí³µÁ¾	Road 1	574.2610662	95.26251984	-0.00077628	0.534610868	0.419607848	0	595.1563	991.1338	636.2164	0.2734	4.2606	1762	2.144552504	0.004953916	65.2204046	0.150659135
30.91528521	×ÔÉí³µÁ¾	Road 1	574.7045718	95.28638077	-0.00077628	0.537029684	0.419607848	0	595.6067	991.1416	636.1934	0.2737	4.2602	1763	2.213598153	0.005113412	65.25749569	0.150744815
30.93193639	×ÔÉí³µÁ¾	Road 1	575.1454533	95.31898956	-0.00077628	0.541164339	0.419607848	0	596.2162	991.1523	636.1623	0.274	4.26	1764	2.654271635	0.006131367	65.30169244	0.15084691
30.94864475	×ÔÉí³µÁ¾	Road 1	575.5879419	95.33901901	-0.00077628	0.543566823	0.427450985	0	596.5874	991.1592	636.1433	0.2738	4.2601	1765	2.029107788	0.004687239	65.33559551	0.150925226
30.96520356	×ÔÉí³µÁ¾	Road 1	576.026569	95.36058655	-0.00077628	0.547708333	0.427450985	0	596.9852	991.166	636.123	0.2742	4.2597	1766	2.114951815	0.004885539	65.37061659	0.151006124
30.98233493	×ÔÉí³µÁ¾	Road 1	576.4805078	95.39108047	-0.00077628	0.550945163	0.427450985	0	597.5422	991.1768	636.0946	0.2735	4.2604	1767	2.509074396	0.005795962	65.41360047	0.151105417
30.99860159	×ÔÉí³µÁ¾	Road 1	576.9116199	95.41007996	-0.00077628	0.553400993	0.427450985	0	597.887	991.1826	636.077	0.2739	4.26	1768	2.005036364	0.004631634	65.44621571	0.151180758
31.01521721	×ÔÉí³µÁ¾	Road 1	577.3520822	95.43212128	-0.00077628	0.55456233	0.427450985	0	598.2851	991.1904	636.0567	0.2733	4.2607	1769	2.136151815	0.004934511	65.48170921	0.151262748
31.03193071	×ÔÉí³µÁ¾	Road 1	577.7952414	95.45419693	-0.00077628	0.555726349	0.427450985	0	598.6832	991.1973	636.0364	0.2737	4.2604	1770	2.131863576	0.004924605	65.5173401	0.151345056
31.04854633	×ÔÉí³µÁ¾	Road 1	578.2359765	95.49121399	-0.00077628	0.558089197	0.427450985	0	599.347	991.209	636.0024	0.2741	4.2601	1771	2.880844918	0.006654752	65.56520713	0.151455628
31.06525543	×ÔÉí³µÁ¾	Road 1	578.6792875	95.51203308	-0.00077628	0.560536742	0.427450985	0	599.7188	991.2158	635.9835	0.2741	4.2602	1772	2.071201624	0.004784476	65.59981504	0.151535573
31.08187875	×ÔÉí³µÁ¾	Road 1	579.1204192	95.53291397	-0.00077628	0.560427606	0.427450985	0	600.0907	991.2227	635.9645	0.274	4.2602	1773	2.079964594	0.004804718	65.63439096	0.151615443
31.09854202	×ÔÉí³µÁ¾	Road 1	579.562709	95.55402832	-0.00077628	0.56069833	0.435294122	0	600.4627	991.2295	635.9456	0.274	4.2602	1774	2.089438074	0.004826602	65.66920784	0.15169587
31.11524819	×ÔÉí³µÁ¾	Road 1	580.0062547	95.57937241	-0.00077628	0.562506735	0.435294122	0	600.9145	991.2383	635.9225	0.2734	4.2605	1775	2.296304105	0.005304462	65.70757027	0.151784487
31.1319001	×ÔÉí³µÁ¾	Road 1	580.4485266	95.61537323	-0.00077628	0.566811979	0.443137258	0	601.5526	991.249	635.8899	0.2743	4.2595	1776	2.829781382	0.006536795	65.75469155	0.151893337
31.14855898	×ÔÉí³µÁ¾	Road 1	580.8910816	95.63656998	-0.00077628	0.567551553	0.443137258	0	601.9249	991.2559	635.8708	0.2743	4.2596	1777	2.095347463	0.004840253	65.78959768	0.151973971
31.16519329	×ÔÉí³µÁ¾	Road 1	581.33309	95.65947647	-0.00077628	0.569316208	0.443137258	0	602.3239	991.2637	635.8505	0.2737	4.2602	1778	2.182281213	0.00504107	65.82589844	0.152057825
31.18186427	×ÔÉí³µÁ¾	Road 1	581.7761708	95.68074188	-0.00077628	0.570722878	0.450980395	0	602.6963	991.2705	635.8315	0.2737	4.2603	1779	2.098818385	0.00484827	65.86088779	0.152138651
31.19858473	×ÔÉí³µÁ¾	Road 1	582.2207308	95.71601486	-0.000779378	0.573939562	0.450980395	0	603.3084	991.2813	635.8002	0.274	4.2599	1780	2.789120926	0.006442869	65.90752317	0.152246379
31.2152469	×ÔÉí³µÁ¾	Road 1	582.6638483	95.73918228	-0.000779378	0.576361358	0.458823532	0	603.7077	991.2891	635.7798	0.2734	4.2605	1781	2.194898356	0.005070215	65.94409495	0.152330859
31.23191714	×ÔÉí³µÁ¾	Road 1	583.1072808	95.76089401	-0.00078093	0.578803718	0.458823532	0	604.0805	991.2959	635.7608	0.2733	4.2606	1782	2.122523517	0.004903029	65.97947793	0.152412594
31.24860388	×ÔÉí³µÁ¾	Road 1	583.5512823	95.78897781	-0.000784039	0.58082062	0.466666669	0	604.4534	991.3027	635.7418	0.2732	4.2607	1783	2.438019869	0.005631826	66.02016052	0.152506571
31.26525982	×ÔÉí³µÁ¾	Road 1	583.9945879	95.81565399	-0.000789501	0.583624125	0.466666669	0	605.0129	991.3125	635.7133	0.2736	4.2604	1784	2.371232363	0.005477547	66.05965564	0.152597805
31.28185712	×ÔÉí³µÁ¾	Road 1	584.4364423	95.83945313	-0.000793418	0.586662292	0.474509805	0	605.4126	991.3193	635.6928	0.274	4.26	1785	2.232900491	0.005158	66.09671575	0.152683413
31.29860764	×ÔÉí³µÁ¾	Road 1	584.8825307	95.87274857	-0.000802871	0.590978742	0.474509805	0	605.9724	991.3301	635.6642	0.2733	4.2606	1786	2.692281621	0.006219171	66.14181286	0.152787588
31.31521666	×ÔÉí³µÁ¾	Road 1	585.3249619	95.89680176	-0.000813197	0.593403995	0.482352942	0	606.3724	991.3369	635.6438	0.2738	4.2592	1787	2.245891624	0.00518801	66.17911493	0.152873755
31.33193272	×ÔÉí³µÁ¾	Road 1	585.7703492	95.91937866	-0.00082522	0.595830739	0.482352942	0	606.7458	991.3438	635.6248	0.2737	4.2593	1788	2.165474227	0.005002245	66.21531313	0.152957373
31.34853735	×ÔÉí³µÁ¾	Road 1	586.2128796	95.94370651	-0.000842251	0.598689318	0.490196079	0	607.1459	991.3516	635.6043	0.2732	4.2599	1789	2.260872969	0.005222617	66.25285408	0.153044093
31.36520136	×ÔÉí³µÁ¾	Road 1	586.6571135	95.96983337	-0.000856208	0.60237509	0.490196079	0	607.5729	991.3594	635.5825	0.2731	4.26	1790	2.346590811	0.005420625	66.29195769	0.153134422
31.38196067	×ÔÉí³µÁ¾	Road 1	587.104072	96.00933609	-0.000873662	0.605989993	0.490196079	0	608.2136	991.3711	635.5499	0.273	4.2601	1791	3.002014338	0.006934653	66.34226939	0.153250642
31.39857043	×ÔÉí³µÁ¾	Road 1	587.547149	96.03253098	-0.000896448	0.607985437	0.490196079	0	608.5874	991.3779	635.5308	0.273	4.2602	1792	2.205717979	0.005095209	66.37890583	0.153335272
31.41527403	×ÔÉí³µÁ¾	Road 1	587.9928759	96.064151	-0.000914442	0.609333158	0.490196079	0	608.9614	991.3848	635.5117	0.2729	4.2603	1793	2.618451102	0.006048622	66.42264339	0.153436306
31.43246771	×ÔÉí³µÁ¾	Road 1	588.451808	96.09084778	-0.000936176	0.61194253	0.490196079	0	609.5224	991.3945	635.483	0.2734	4.2599	1794	2.336586159	0.005397514	66.46281791	0.153529109
31.44850931	×ÔÉí³µÁ¾	Road 1	588.8800932	96.11430359	-0.000955584	0.612671256	0.490196079	0	609.8966	991.4014	635.4639	0.2733	4.26	1795	2.261925325	0.005225048	66.4991028	0.153612927
31.46522537	×ÔÉí³µÁ¾	Road 1	589.3265493	96.14956284	-0.000973459	0.613766313	0.490196079	0	610.458	991.4111	635.4352	0.2738	4.2602	1796	2.800175702	0.006468406	66.54591071	0.153721054
31.48190001	×ÔÉí³µÁ¾	Road 1	589.7720083	96.17313538	-0.000991555	0.614495456	0.490196079	0	610.8324	991.418	635.4161	0.2737	4.2602	1797	2.222812113	0.005134696	66.5829753	0.153806673
31.49855082	×ÔÉí³µÁ¾	Road 1	590.2169404	96.19683838	-0.001010796	0.614984512	0.498039216	0	611.2068	991.4248	635.397	0.2737	4.2602	1798	2.231479569	0.005154718	66.62013125	0.153892503
31.51525075	×ÔÉí³µÁ¾	Road 1	590.6633571	96.2339241	-0.001024691	0.617151499	0.498039216	0	611.7955	991.4355	635.367	0.2737	4.2603	1799	2.894987272	0.006687421	66.66847734	0.154004183
31.53187554	×ÔÉí³µÁ¾	Road 1	591.1078747	96.2576889	-0.001036836	0.619158685	0.498039216	0	612.1702	991.4424	635.3478	0.2736	4.2603	1800	2.237646435	0.005168963	66.70567773	0.154090116
31.54856301	×ÔÉí³µÁ¾	Road 1	591.5541795	96.28165283	-0.001052862	0.620495737	0.498039216	0	612.545	991.4492	635.3287	0.2736	4.2603	1801	2.243588082	0.005182688	66.74311754	0.154176602
31.56525048	×ÔÉí³µÁ¾	Road 1	592.0005943	96.3054039	-0.001062366	0.621455491	0.505882382	0	612.9199	991.4561	635.3096	0.2736	4.2604	1802	2.233454038	0.005159279	66.78038823	0.154262697
31.58190972	×ÔÉí³µÁ¾	Road 1	592.4464441	96.3464653	-0.001072886	0.623792768	0.505882382	0	613.5629	991.4678	635.2768	0.2735	4.2604	1803	3.101160015	0.00716368	66.83205121	0.154382038
31.59861258	×ÔÉí³µÁ¾	Road 1	592.8935729	96.37051849	-0.001084441	0.624950349	0.505882382	0	613.938	991.4746	635.2576	0.2735	4.2604	1804	2.248729615	0.005194565	66.86961144	0.154468802
31.61525057	×ÔÉí³µÁ¾	Road 1	593.3390765	96.39466095	-0.00109219	0.62651825	0.505882382	0	614.3133	991.4814	635.2385	0.2735	4.2604	1805	2.258363466	0.00521682	66.90718605	0.1545556
31.63187059	×ÔÉí³µÁ¾	Road 1	593.7842666	96.4309433	-0.001097053	0.627609611	0.513725519	0	614.8763	991.4922	635.2097	0.2726	4.2609	1806	2.868929718	0.006627228	66.95486773	0.154665744
31.6485478	×ÔÉí³µÁ¾	Road 1	594.2311008	96.45520248	-0.001104862	0.629187584	0.513725519	0	615.2518	991.499	635.1906	0.2726	4.261	1807	2.262582235	0.005226565	66.99260128	0.154752909
31.66523966	×ÔÉí³µÁ¾	Road 1	594.6784407	96.47953033	-0.001109761	0.631184936	0.513725519	0	615.6274	991.5059	635.1714	0.2726	4.261	1808	2.26544104	0.005233169	67.03041572	0.15484026
31.68186372	×ÔÉí³µÁ¾	Road 1	595.1240841	96.50571213	-0.001112708	0.633604765	0.521568656	0	616.0299	991.5127	635.1508	0.2731	4.2605	1809	2.363916963	0.005460648	67.0697136	0.154931038
31.69870807	×ÔÉí³µÁ¾	Road 1	595.5758051	96.54248199	-0.001112708	0.635109782	0.521568656	0	616.5936	991.5234	635.1221	0.2726	4.2611	1810	2.871787446	0.006633829	67.11808701	0.155042781
31.71522803	×ÔÉí³µÁ¾	Road 1	596.0189396	96.5671051	-0.001112708	0.63710773	0.521568656	0	616.9695	991.5303	635.1028	0.2726	4.2611	1811	2.294792658	0.005300971	67.15599688	0.155130353
31.73189717	×ÔÉí³µÁ¾	Road 1	596.4662638	96.60769958	-0.001113692	0.639029145	0.521568656	0	617.5873	991.541	635.0714	0.273	4.2607	1812	3.084158796	0.007124407	67.20740715	0.155249111
31.74856301	×ÔÉí³µÁ¾	Road 1	596.9136144	96.63250122	-0.001113692	0.639759004	0.521568656	0	617.9635	991.5479	635.0521	0.273	4.2607	1813	2.294192481	0.005299585	67.2456418	0.155337433
31.76534688	×ÔÉí³µÁ¾	Road 1	597.3642495	96.65744705	-0.001113692	0.640238464	0.529411793	0	618.3398	991.5547	635.0329	0.273	4.2607	1814	2.293141129	0.005297156	67.28412959	0.155426339
31.78185071	×ÔÉí³µÁ¾	Road 1	597.8075443	96.69646225	-0.001113692	0.642826676	0.529411793	0	618.9312	991.5654	635.0027	0.273	4.2608	1815	3.02716595	0.006992753	67.33408941	0.155541747
31.79851105	×ÔÉí³µÁ¾	Road 1	598.2551591	96.72149048	-0.001113692	0.645243049	0.529411793	0	619.3077	991.5723	634.9835	0.2731	4.2608	1816	2.307805009	0.00533103	67.37253823	0.155630563
31.81525094	×ÔÉí³µÁ¾	Road 1	598.7050361	96.74838638	-0.001113692	0.645959616	0.529411793	0	619.7113	991.5791	634.9629	0.2735	4.2604	1817	2.39565451	0.005533962	67.41264122	0.155723201
31.83187279	×ÔÉí³µÁ¾	Road 1	599.1519235	96.78791656	-0.001113692	0.647447884	0.529411793	0	620.3033	991.5898	634.9327	0.2736	4.2604	1818	3.041611728	0.007026123	67.46319844	0.155839988
31.84852947	×ÔÉí³µÁ¾	Road 1	599.5998387	96.80770569	-0.001113692	0.647390604	0.529411793	0	620.4918	991.5938	634.923	0.2731	4.2609	1819	2.046789405	0.004728084	67.49729116	0.155918743
31.86518285	×ÔÉí³µÁ¾	Road 1	600.0478069	96.83833008	-0.001113692	0.648896754	0.529411793	0	621.0572	991.6035	634.8942	0.2736	4.2605	1820	2.591896784	0.005987282	67.540455	0.156018451
31.88188571	×ÔÉí³µÁ¾	Road 1	600.4972234	96.86359177	-0.001116645	0.64961642	0.529411793	0	621.4343	991.6104	634.8749	0.2736	4.2605	1821	2.319251368	0.005357471	67.57919314	0.156107936
31.89857978	×ÔÉí³µÁ¾	Road 1	600.9466048	96.90706329	-0.001118617	0.650006473	0.529411793	0	622.0809	991.6221	634.8419	0.2736	4.2605	1822	3.2340092	0.007470561	67.6331819	0.15623265
31.91519687	×ÔÉí³µÁ¾	Road 1	601.3940303	96.93226318	-0.00112158	0.650117218	0.529411793	0	622.4583	991.6289	634.8227	0.2736	4.2605	1823	2.324107325	0.005368688	67.6718018	0.156321862
31.93184988	×ÔÉí³µÁ¾	Road 1	601.8425403	96.95757294	-0.001124547	0.649988174	0.529411793	0	622.8357	991.6357	634.8034	0.2737	4.2606	1824	2.327421602	0.005376344	67.71056038	0.156411394
31.94854138	×ÔÉí³µÁ¾	Road 1	602.2922462	96.99195328	-0.001133481	0.65070796	0.529411793	0	623.2132	991.6426	634.7841	0.2737	4.2606	1825	2.780563663	0.006423102	67.75697216	0.156518606
31.96518376	×ÔÉí³µÁ¾	Road 1	602.740771	97.02272873	-0.001142463	0.650928795	0.529411793	0	623.8067	991.6533	634.7538	0.2737	4.2606	1826	2.604888437	0.006017292	67.80032371	0.156618748
31.98182908	×ÔÉí³µÁ¾	Road 1	603.1894921	97.04809341	-0.001153504	0.651228845	0.529411793	0	624.1845	991.6602	634.7346	0.2738	4.2606	1827	2.332671022	0.00538847	67.83915176	0.156708441
31.99850702	×ÔÉí³µÁ¾	Road 1	603.6392101	97.0734375	-0.001163603	0.650240242	0.529411793	0	624.5624	991.668	634.7153	0.2728	4.2616	1828	2.329665769	0.005381528	67.87800578	0.156798193
32.01518642	×ÔÉí³µÁ¾	Road 1	604.0891522	97.11326294	-0.00117478	0.650889516	0.529411793	0	625.1564	991.6787	634.6849	0.2729	4.2616	1829	3.058793994	0.007065814	67.92902464	0.156916047
32.03185886	×ÔÉí³µÁ¾	Road 1	604.5390237	97.13860703	-0.001188081	0.651183009	0.529411793	0	625.5345	991.6855	634.6656	0.2729	4.2616	1830	2.331449126	0.005385647	67.96789559	0.157005839
32.04851004	×ÔÉí³µÁ¾	Road 1	604.9885058	97.1784256	-0.001201483	0.650133491	0.513725519	0	626.129	991.6963	634.6353	0.273	4.2616	1831	3.063697527	0.007077141	68.01890976	0.157123682
32.06524699	×ÔÉí³µÁ¾	Road 1	605.4404206	97.20368042	-0.001213942	0.647886038	0.505882382	0	626.5074	991.7031	634.616	0.273	4.2616	1832	2.323409646	0.005367076	68.05779656	0.15721351
32.08188168	×ÔÉí³µÁ¾	Road 1	605.8896901	97.22877045	-0.001227537	0.644349515	0.498039216	0	626.8859	991.71	634.5966	0.273	4.2615	1833	2.32340383	0.005367063	68.09644565	0.157302789
32.09848741	×ÔÉí³µÁ¾	Road 1	606.3382923	97.25368195	-0.001241233	0.640823364	0.490196079	0	627.2645	991.7168	634.5773	0.2731	4.2615	1834	2.317099152	0.005352499	68.13492277	0.157391672
32.11518111	×ÔÉí³µÁ¾	Road 1	606.7894673	97.29597244	-0.001249711	0.635084331	0.490196079	0	627.9137	991.7285	634.5442	0.2731	4.2614	1835	3.186374054	0.007360524	68.18811514	0.157514546
32.13188067	×ÔÉí³µÁ¾	Road 1	607.2409141	97.32042389	-0.001259296	0.631986499	0.482352942	0	628.2925	991.7354	634.5248	0.2732	4.2614	1836	2.288230871	0.005285813	68.2263276	0.157602817
32.14855751	×ÔÉí³µÁ¾	Road 1	607.6918592	97.34471741	-0.001266784	0.628468931	0.474509805	0	628.6715	991.7422	634.5055	0.2732	4.2613	1837	2.282441005	0.005272439	68.2643915	0.157690744
32.16518486	×ÔÉí³µÁ¾	Road 1	608.1416408	97.38254471	-0.001275378	0.622325361	0.466666669	0	629.2672	991.7529	634.4751	0.2737	4.2612	1838	2.971640491	0.00686449	68.31380202	0.157804883
32.18184594	×ÔÉí³µÁ¾	Road 1	608.5924447	97.40630951	-0.001280769	0.617531598	0.450980395	0	629.6464	991.7598	634.4557	0.2737	4.2612	1839	2.258149088	0.005216324	68.35142522	0.157891792
32.19863714	×ÔÉí³µÁ¾	Road 1	609.0469335	97.44147949	-0.00128185	0.609283686	0.435294122	0	630.2153	991.7705	634.4267	0.2733	4.2616	1840	2.821351211	0.006517321	68.3987991	0.158001226
32.21519009	×ÔÉí³µÁ¾	Road 1	609.4950793	97.46451645	-0.001286176	0.602371633	0.403921574	0	630.5947	991.7773	634.4073	0.2734	4.2615	1841	2.230139692	0.005151623	68.43571447	0.1580865
32.23184053	×ÔÉí³µÁ¾	Road 1	609.9459694	97.48715515	-0.001288343	0.592915952	0.380392164	0	630.9742	991.7842	634.3879	0.2734	4.2615	1842	2.203576607	0.005090262	68.47240501	0.158171256
32.24858372	×ÔÉí³µÁ¾	Road 1	610.3994738	97.509272	-0.001288343	0.581759155	0.34117648	0	631.3539	991.791	634.3685	0.2735	4.2608	1843	2.171404784	0.005015945	68.50876124	0.158255238
32.28199604	×ÔÉí³µÁ¾	Road 1	611.3048826	97.55297012	-0.001288343	0.552247167	0.286274523	0	632.1404	991.8057	634.3284	0.2731	4.2611	1844	2.161076978	0.004992088	68.58096785	0.158422036
32.29857061	×ÔÉí³µÁ¾	Road 1	611.7541943	97.59059143	-0.001288343	0.528753221	0.239215687	0	632.873	991.8184	634.291	0.2738	4.2605	1845	2.972980409	0.006867585	68.63024372	0.158535863
32.31524012	×ÔÉí³µÁ¾	Road 1	612.2061703	97.61017456	-0.001288343	0.502704918	0.137254909	0	633.2802	991.8262	634.2702	0.2733	4.2609	1846	2.050076673	0.004735677	68.66441749	0.158614804
32.33189643	×ÔÉí³µÁ¾	Road 1	612.6578682	97.62741623	-0.001288343	0.479260594	0.082352944	0	633.6602	991.833	634.2508	0.2734	4.2609	1847	1.932591106	0.004464285	68.69660733	0.158689163
32.3484952	×ÔÉí³µÁ¾	Road 1	613.1080798	97.64351807	-0.001288343	0.453463644	0.043137256	0	634.0403	991.8398	634.2314	0.2735	4.2608	1848	1.877952741	0.004338071	68.72777902	0.15876117
32.36517387	×ÔÉí³µÁ¾	Road 1	613.5605398	97.66102753	-0.001288343	0.422202587	0.019607844	0	634.502	991.8486	634.2078	0.2731	4.2612	1849	1.945530621	0.004494176	68.76022789	0.158836126
32.38191522	×ÔÉí³µÁ¾	Road 1	614.0147963	97.68167496	-0.001288343	0.374963045	0	0	635.1268	991.8594	634.176	0.2737	4.2606	1850	2.100758246	0.004852752	68.79539742	0.158917368
32.39854734	×ÔÉí³µÁ¾	Road 1	614.4661359	97.69185104	-0.001288343	0.315471143	0	0.011764706	635.5071	991.8672	634.1566	0.2728	4.2615	1851	1.576339332	0.003641344	68.82161528	0.158977931
32.41518605	×ÔÉí³µÁ¾	Road 1	614.9176793	97.69722061	-0.001288343	0.209121987	0	0.011764706	635.8875	991.874	634.1372	0.2729	4.2614	1852	1.332327303	0.003077676	68.8437835	0.15902914
32.43184713	×ÔÉí³µÁ¾	Road 1	615.3698386	97.69917068	-0.001288343	0.170667544	0	0.011764706	636.4852	991.8848	634.1066	0.2729	4.2613	1853	1.158703024	0.002676604	68.86308874	0.159073735
32.448653	×ÔÉí³µÁ¾	Road 1	615.8259378	97.70142975	-0.001288343	0.213959336	0	0.011764706	636.8655	991.8916	634.0872	0.273	4.2612	1854	1.173394948	0.002710542	68.88280866	0.159119288
32.46520631	×ÔÉí³µÁ¾	Road 1	616.2752011	97.70540543	-0.001288343	0.227284506	0	0.011764706	637.2459	991.8984	634.0677	0.273	4.2612	1855	1.262722127	0.002916888	68.90371089	0.159167572
32.48189378	×ÔÉí³µÁ¾	Road 1	616.7281206	97.70866699	-0.001288343	0.190992549	0	0.011764706	637.6535	991.9063	634.047	0.2726	4.2616	1856	1.224990741	0.002829729	68.92415288	0.159214793
32.49851087	×ÔÉí³µÁ¾	Road 1	617.1791348	97.70971756	-0.001288343	0.148114845	0	0.011764706	638.1154	991.9141	634.0234	0.2731	4.2616	1857	1.113349254	0.002571837	68.94265351	0.15925753
32.51518917	×ÔÉí³µÁ¾	Road 1	617.6318099	97.70958023	-0.001288343	0.148301467	0	0.011764706	638.5774	991.9229	633.9998	0.2726	4.262	1858	1.059963402	0.002448515	68.9603319	0.159298367
32.53185171	×ÔÉí³µÁ¾	Road 1	618.0840609	97.71040421	-0.001288343	0.167208552	0	0.011764706	639.148	991.9326	633.9707	0.2732	4.2614	1859	1.101726355	0.002544988	68.97868946	0.159340773
32.54854798	×ÔÉí³µÁ¾	Road 1	618.5372319	97.71139984	-0.001288343	0.161445469	0	0.011764706	639.5284	991.9404	633.9513	0.2722	4.2623	1860	1.110331937	0.002564867	68.99722786	0.159383596
32.56520282	×ÔÉí³µÁ¾	Road 1	618.9892794	97.71155777	-0.001288343	0.146826789	0	0.011764706	639.936	991.9473	633.9304	0.2728	4.2617	1861	1.067985941	0.002467048	69.015015	0.159424685
32.58180855	×ÔÉí³µÁ¾	Road 1	619.439991	97.71098099	-0.001288343	0.141307831	0	0.011764706	640.561	991.959	633.8986	0.2724	4.2621	1862	1.059974297	0.002448541	69.03261664	0.159465344
32.59851361	×ÔÉí³µÁ¾	Road 1	619.8933978	97.71076126	-0.001288343	0.147257403	0	0.011764706	640.9686	991.9658	633.8777	0.2729	4.2615	1863	1.059972588	0.002448537	69.05032355	0.159506247
32.61520951	×ÔÉí³µÁ¾	Road 1	620.3465558	97.71074066	-0.001288343	0.148526832	0	0.011764706	641.349	991.9727	633.8583	0.2729	4.2615	1864	1.059972427	0.002448536	69.06802075	0.159547128
32.63187682	×ÔÉí³µÁ¾	Road 1	620.7989376	97.71072006	-0.001288343	0.141261265	0	0.011764706	641.9196	991.9834	633.8292	0.2725	4.2618	1865	1.059972267	0.002448536	69.08568763	0.159587938
32.64854816	×ÔÉí³µÁ¾	Road 1	621.2514256	97.71000595	-0.001288343	0.138339683	0	0.011764706	642.3272	991.9912	633.8085	0.272	4.2622	1866	1.059966713	0.002448523	69.1033587	0.159628759
32.66525176	×ÔÉí³µÁ¾	Road 1	621.7047861	97.7093605	-0.001288343	0.140282348	0	0.011764706	642.7348	991.998	633.7876	0.2726	4.2617	1867	1.059961693	0.002448512	69.12106387	0.159669658
32.68181936	×ÔÉí³µÁ¾	Road 1	622.154455	97.70922318	-0.001289427	0.141511679	0	0.011764706	643.1152	992.0049	633.7681	0.2726	4.2616	1868	1.059960625	0.002448509	69.13862488	0.159710223
32.69848887	×ÔÉí³µÁ¾	Road 1	622.6068866	97.70859146	-0.001294858	0.141144097	0	0.011764706	643.55	992.0137	633.746	0.2717	4.2625	1869	1.059955711	0.002448498	69.15629382	0.159751039
32.71516314	×ÔÉí³µÁ¾	Road 1	623.0594453	97.70808334	-0.001299213	0.139201701	0	0.011764706	644.1205	992.0234	633.7169	0.2722	4.2619	1870	1.059951759	0.002448489	69.17396774	0.159791865
32.73186418	×ÔÉí³µÁ¾	Road 1	623.5127263	97.7072319	-0.001307953	0.139431506	0	0.011764706	644.6912	992.0342	633.6877	0.2718	4.2623	1871	1.059945137	0.002448473	69.19166992	0.159832758
32.74852159	×ÔÉí³µÁ¾	Road 1	623.9648213	97.70678558	-0.001324447	0.140291214	0	0.011764706	645.0716	992.041	633.6683	0.2718	4.2622	1872	1.059941666	0.002448465	69.2093258	0.159873543
32.76514747	×ÔÉí³µÁ¾	Road 1	624.416059	97.7063942	-0.001338853	0.141138837	0	0.011764706	645.452	992.0479	633.6489	0.2719	4.2621	1873	1.059938622	0.002448458	69.22694822	0.15991425
32.78184191	×ÔÉí³µÁ¾	Road 1	624.8691544	97.70583801	-0.001353363	0.139214531	0	0.011764706	646.0226	992.0586	633.6198	0.2714	4.2625	1874	1.059934296	0.002448448	69.24464323	0.159955126
32.79856347	×ÔÉí³µÁ¾	Road 1	625.3229839	97.70538483	-0.001377024	0.140045807	0	0.011764706	646.403	992.0654	633.6003	0.2716	4.2625	1875	1.059930771	0.00244844	69.26236692	0.159996068
32.81521501	×ÔÉí³µÁ¾	Road 1	625.7749113	97.70494537	-0.001399812	0.14003095	0	0.011764706	646.7834	992.0723	633.5809	0.2717	4.2624	1876	1.059927353	0.002448432	69.28001635	0.160036838
32.83182331	×ÔÉí³µÁ¾	Road 1	626.2256622	97.70439606	-0.001420535	0.139396265	0	0.011764706	647.3539	992.082	633.5518	0.2724	4.2619	1877	1.05992308	0.002448422	69.29761986	0.160077502
32.84851884	×ÔÉí³µÁ¾	Road 1	626.6787786	97.703936	-0.001449656	0.139809981	0	0.011764706	647.7615	992.0898	633.531	0.2721	4.2623	1878	1.059919502	0.002448414	69.31531578	0.160118379
32.86525909	×ÔÉí³µÁ¾	Road 1	627.1331059	97.70331802	-0.001479172	0.139442742	0	0.011764706	648.1419	992.0967	633.5116	0.2722	4.2623	1879	1.059914696	0.002448403	69.33305902	0.160159366
32.88184246	×ÔÉí³µÁ¾	Road 1	627.5831724	97.70268631	-0.001509085	0.140072271	0	0.011764706	648.7125	992.1074	633.4824	0.2719	4.2627	1880	1.059909782	0.002448392	69.3506359	0.160199969
32.89857245	×ÔÉí³µÁ¾	Road 1	628.0372159	97.70218506	-0.001538179	0.138370305	0	0.011764706	649.1201	992.1143	633.4617	0.2724	4.2622	1881	1.059905884	0.002448383	69.36836811	0.16024093
32.91516754	×ÔÉí³µÁ¾	Road 1	628.4875962	97.70168381	-0.001565175	0.138384119	0	0.011764706	649.5004	992.1211	633.4423	0.2723	4.262	1882	1.059901985	0.002448374	69.38595729	0.160281561
32.93186124	×ÔÉí³µÁ¾	Road 1	628.9406487	97.70087357	-0.001587496	0.137515813	0	0.011764706	650.071	992.1318	633.4131	0.2717	4.2623	1883	1.059895683	0.002448359	69.40365087	0.160322434
32.94857254	×ÔÉí³µÁ¾	Road 1	629.3941761	97.70031052	-0.001612545	0.137527749	0	0.011764706	650.4514	992.1387	633.3937	0.2717	4.2622	1884	1.059891304	0.002448349	69.42136302	0.160363349
32.96520722	×ÔÉí³µÁ¾	Road 1	629.8456222	97.6998436	-0.001628967	0.1360109	0	0.011764706	650.8318	992.1455	633.3743	0.2718	4.2622	1885	1.059887672	0.002448341	69.43899392	0.160404076
32.98190679	×ÔÉí³µÁ¾	Road 1	630.2988241	97.69874496	-0.001644224	0.136495695	0	0.011764706	651.4295	992.1563	633.3438	0.2719	4.2621	1886	1.059879128	0.002448321	69.45669344	0.160444962
32.99854184	×ÔÉí³µÁ¾	Road 1	630.7502724	97.69817505	-0.001651889	0.134322688	0	0.011764706	651.8099	992.1641	633.3243	0.2709	4.263	1887	1.059874695	0.002448311	69.47432451	0.16048569
33.01517726	×ÔÉí³µÁ¾	Road 1	631.2017265	97.69724808	-0.001654449	0.134800971	0	0.011764706	652.1902	992.1709	633.3049	0.271	4.2629	1888	1.059867485	0.002448294	69.49195585	0.160526418
33.0318354	×ÔÉí³µÁ¾	Road 1	631.6537931	97.69634857	-0.001654449	0.133910686	0	0.011764706	652.788	992.1816	633.2744	0.2711	4.2628	1889	1.059860489	0.002448278	69.50961116	0.160567202
33.04856466	×ÔÉí³µÁ¾	Road 1	632.1077849	97.69534607	-0.001654449	0.133111686	0	0.011764706	653.1683	992.1885	633.255	0.2712	4.2622	1890	1.059852692	0.00244826	69.5273417	0.160608159
33.06514106	×ÔÉí³µÁ¾	Road 1	632.557625	97.69456329	-0.001654449	0.13312231	0	0.011764706	653.5486	992.1953	633.2356	0.2712	4.2621	1891	1.059846603	0.002448246	69.54491015	0.160648742
33.08182926	×ÔÉí³µÁ¾	Road 1	633.0104941	97.69349213	-0.001654449	0.13222383	0	0.011764706	654.1464	992.2061	633.2051	0.2713	4.2619	1892	1.059838272	0.002448226	69.56259694	0.160689599
33.0985127	×ÔÉí³µÁ¾	Road 1	633.4632299	97.69262695	-0.001654449	0.131385311	0	0.011764706	654.5267	992.2129	633.1857	0.2714	4.2618	1893	1.059831543	0.002448211	69.58027858	0.160730444
33.11513565	×ÔÉí³µÁ¾	Road 1	633.9143202	97.69174118	-0.001654449	0.130956411	0	0.011764706	654.907	992.2197	633.1663	0.2715	4.2617	1894	1.059824654	0.002448195	69.59789599	0.16077114
33.13181286	×ÔÉí³µÁ¾	Road 1	634.3668755	97.69016876	-0.001654449	0.130337879	0	0.011764706	655.5048	992.2305	633.1357	0.2716	4.2616	1895	1.059812424	0.002448167	69.6155707	0.160811968
33.14853698	×ÔÉí³µÁ¾	Road 1	634.8206996	97.68922806	-0.001654449	0.129919231	0	0.011764706	655.8851	992.2383	633.1163	0.2706	4.2626	1896	1.059805107	0.00244815	69.63329501	0.160852911
33.16515554	×ÔÉí³µÁ¾	Road 1	635.2716546	97.68827362	-0.001654449	0.129070088	0	0.011764706	656.2654	992.2451	633.0969	0.2707	4.2625	1897	1.059797684	0.002448133	69.65090732	0.160893596
33.18184887	×ÔÉí³µÁ¾	Road 1	635.724631	97.68658447	-0.001654449	0.1293208	0	0.011764706	656.863	992.2559	633.0664	0.2708	4.2624	1898	1.059784546	0.002448102	69.66859866	0.160934463
33.19848832	×ÔÉí³µÁ¾	Road 1	636.1761404	97.68556824	-0.00165061	0.127622843	0	0.011764706	657.2434	992.2627	633.047	0.2709	4.2623	1899	1.059776642	0.002448084	69.68623276	0.160975198
33.21515453	×ÔÉí³µÁ¾	Road 1	636.6283717	97.68464813	-0.0016455	0.128243223	0	0.011764706	657.6237	992.2695	633.0276	0.2709	4.263	1900	1.059769485	0.002448068	69.7038951	0.161015998
33.23188672	×ÔÉí³µÁ¾	Road 1	637.0823857	97.68300018	-0.0016455	0.126986384	0	0.011764706	658.2213	992.2803	632.9971	0.2711	4.2629	1901	1.059756668	0.002448038	69.72162715	0.161056959
33.24847412	×ÔÉí³µÁ¾	Road 1	637.5324665	97.68203201	-0.0016455	0.12717703	0	0.011764706	658.6016	992.2871	632.9777	0.2712	4.2629	1902	1.059749138	0.002448021	69.73920563	0.161097565
33.26516415	×ÔÉí³µÁ¾	Road 1	637.9853272	97.68094711	-0.0016455	0.127190813	0	0.011764706	658.9819	992.2939	632.9583	0.2713	4.2628	1903	1.0597407	0.002448001	69.75689274	0.161138422
33.28185749	×ÔÉí³µÁ¾	Road 1	638.4382693	97.67920303	-0.0016455	0.125926673	0	0.011764706	659.5796	992.3047	632.9277	0.2716	4.2628	1904	1.059727135	0.00244797	69.77458312	0.161179287
33.29856548	×ÔÉí³µÁ¾	Road 1	638.891604	97.67807693	-0.0016455	0.126360744	0	0.011764706	659.9598	992.3115	632.9083	0.2717	4.2628	1905	1.059718376	0.002447949	69.79228889	0.161220187
33.31558358	×ÔÉí³µÁ¾	Road 1	639.3533474	97.67694397	-0.0016455	0.125523612	0	0.011764706	660.3401	992.3184	632.8889	0.2711	4.2627	1906	1.059709564	0.002447929	69.81032313	0.161261846
33.33192063	×ÔÉí³µÁ¾	Road 1	639.7965995	97.67421799	-0.0016455	0.085196644	0	0.019607844	660.9649	992.3301	632.857	0.2707	4.2631	1907	1.059688362	0.00244788	69.8276353	0.161301838
33.34849043	×ÔÉí³µÁ¾	Road 1	640.2461428	97.66897888	-0.0016455	0.00371074	0	0.027450981	661.3452	992.3369	632.8376	0.2708	4.2631	1908	1.059647614	0.002447786	69.84519346	0.161342397
33.36561887	×ÔÉí³µÁ¾	Road 1	640.710797	97.65953064	-0.0016455	-0.066708274	0	0.027450981	661.7254	992.3438	632.8182	0.2709	4.2631	1909	1.059574127	0.002447616	69.86334231	0.161384321
33.38185547	×ÔÉí³µÁ¾	Road 1	641.1511834	97.64301682	-0.0016455	-0.030107893	0	0.027450981	662.3228	992.3545	632.7877	0.2711	4.2631	1910	1.059445686	0.00244732	69.88054411	0.161424057
33.39850079	×ÔÉí³µÁ¾	Road 1	641.6026203	97.63546371	-0.0016455	0.014272784	0	0.027450981	662.7029	992.3613	632.7683	0.2712	4.263	1911	1.05938694	0.002447184	69.89817793	0.161464791
33.41524874	×ÔÉí³µÁ¾	Road 1	642.0568082	97.62843246	-0.0016455	-0.008381128	0	0.035294119	663.0831	992.3682	632.7489	0.2713	4.263	1912	1.059332253	0.002447058	69.91591958	0.161505774
33.4319417	×ÔÉí³µÁ¾	Road 1	642.5094218	97.61052475	-0.0016455	-0.168532625	0	0.043137256	663.6531	992.3789	632.7198	0.271	4.2634	1913	1.05919297	0.002446736	69.93360065	0.161546618
33.44851004	×ÔÉí³µÁ¾	Road 1	642.9585696	97.59166946	-0.0016455	-0.277978867	0	0.05882353	664.0331	992.3857	632.7004	0.2711	4.2633	1914	1.059046318	0.002446397	69.95114729	0.16158715
33.46519201	×ÔÉí³µÁ¾	Road 1	643.4106826	97.56681976	-0.0016455	-0.408611536	0	0.074509807	664.4131	992.3926	632.681	0.2713	4.2632	1915	1.058853043	0.002445951	69.96881104	0.161627954
33.4818234	×ÔÉí³µÁ¾	Road 1	643.861187	97.51539688	-0.0016455	-0.557792723	0	0.082352944	665.0098	992.4033	632.6505	0.2714	4.2631	1916	1.058453087	0.002445027	69.98641459	0.161668618
33.49849804	×ÔÉí³µÁ¾	Road 1	644.3126959	97.47928619	-0.0016455	-0.573734939	0	0.090196081	665.3894	992.4102	632.6312	0.2714	4.2631	1917	1.058172226	0.002444378	70.00405923	0.161709377
33.51587133	×ÔÉí³µÁ¾	Road 1	644.7828453	97.4218071	-0.0016455	-0.576841235	0	0.090196081	665.9856	992.4219	632.6007	0.2705	4.2639	1918	1.057725166	0.002443345	70.0224354	0.161751826
33.5484842	×ÔÉí³µÁ¾	Road 1	645.6647694	97.35196152	-0.0016455	-0.566753626	0	0.090196081	666.6356	992.4336	632.5676	0.2705	4.2639	1919	1.057181923	0.00244209	70.05691313	0.161831469
33.56519513	×ÔÉí³µÁ¾	Road 1	646.1164515	97.3049263	-0.0016455	-0.605115771	0	0.098039217	667.204	992.4434	632.5385	0.271	4.2633	1920	1.056816093	0.002441245	70.07457351	0.161872265
33.58178289	×ÔÉí³µÁ¾	Road 1	646.5646213	97.26514893	-0.0016455	-0.668593884	0	0.098039217	667.5828	992.4502	632.5192	0.271	4.2633	1921	1.056506714	0.002440531	70.0920986	0.161912748
33.59852828	×ÔÉí³µÁ¾	Road 1	647.0168415	97.22036591	-0.001644224	-0.681095898	0	0.098039217	667.9884	992.458	632.4985	0.2705	4.2637	1922	1.056158401	0.002439726	70.10978437	0.161953602
33.6151351	×ÔÉí³µÁ¾	Road 1	647.4649892	97.14872131	-0.001644224	-0.618750572	0	0.098039217	668.6641	992.4697	632.464	0.271	4.2631	1923	1.055601166	0.002438439	70.12731456	0.161994097
33.63186253	×ÔÉí³µÁ¾	Road 1	647.9162128	97.11029663	-0.001644224	-0.616852343	0	0.098039217	669.0422	992.4775	632.4447	0.27	4.2641	1924	1.055302307	0.002437748	70.14496705	0.162034874
33.64847595	×ÔÉí³µÁ¾	Road 1	648.3641796	97.07091064	-0.001644224	-0.66359055	0	0.105882354	669.4202	992.4844	632.4254	0.27	4.2641	1925	1.054995972	0.002437041	70.16249414	0.162075361
33.66513556	×ÔÉí³µÁ¾	Road 1	648.8130876	97.00520554	-0.001644224	-0.759207845	0	0.105882354	669.9869	992.4941	632.3965	0.2705	4.2635	1926	1.054484932	0.00243586	70.18006145	0.162115942
33.68185272	×ÔÉí³µÁ¾	Road 1	649.2633314	96.95891876	-0.001644224	-0.790381968	0	0.121568628	670.3644	992.501	632.3772	0.2705	4.2635	1927	1.054124924	0.002435029	70.19768343	0.162156649
33.69856622	×ÔÉí³µÁ¾	Road 1	649.713247	96.90948029	-0.001644224	-0.865467072	0	0.121568628	670.7418	992.5078	632.3579	0.2705	4.2629	1928	1.053740402	0.00243414	70.21529511	0.162197332
33.71512392	×ÔÉí³µÁ¾	Road 1	650.1587113	96.85346375	-0.001644224	-0.898293734	0	0.121568628	671.146	992.5156	632.3373	0.27	4.2633	1929	1.053304718	0.002433134	70.23273542	0.162237619
33.7317905	×ÔÉí³µÁ¾	Road 1	650.6066986	96.76580658	-0.001640401	-0.83076942	0	0.121568628	671.7921	992.5273	632.3043	0.27	4.2633	1930	1.05262294	0.002431559	70.25027904	0.162278145
33.74851279	×ÔÉí³µÁ¾	Road 1	651.0559572	96.71705475	-0.001640401	-0.816086471	0	0.121568628	672.1687	992.5342	632.2851	0.27	4.2633	1931	1.052243759	0.002430683	70.26787497	0.162318791
33.76521162	×ÔÉí³µÁ¾	Road 1	651.5043579	96.66798019	-0.001640401	-0.837912142	0	0.121568628	672.5452	992.541	632.2659	0.27	4.2633	1932	1.051862068	0.002429801	70.28543984	0.162359366
33.78176383	×ÔÉí³µÁ¾	Road 1	651.948456	96.58851471	-0.001640401	-0.863833368	0	0.121568628	673.1364	992.5518	632.2357	0.27	4.2633	1933	1.051244003	0.002428374	70.30284025	0.162399561
33.79854037	×ÔÉí³µÁ¾	Road 1	652.3983365	96.53777161	-0.001640401	-0.8525365	0	0.121568628	673.5123	992.5586	632.2165	0.27	4.2633	1934	1.050849335	0.002427462	70.32046987	0.162440285
33.81512264	×ÔÉí³µÁ¾	Road 1	652.8427774	96.48782501	-0.001640401	-0.836994469	0	0.121568628	673.888	992.5654	632.1973	0.27	4.2633	1935	1.050460861	0.002426565	70.33788889	0.162480523
33.83185703	×ÔÉí³µÁ¾	Road 1	653.29095	96.41353683	-0.001639128	-0.839170158	0	0.121568628	674.4513	992.5752	632.1686	0.2705	4.2629	1936	1.049883064	0.00242523	70.35545804	0.162521108
33.84923509	×ÔÉí³µÁ¾	Road 1	653.7561546	96.37073135	-0.001639128	-0.846590936	0	0.121568628	674.7729	992.5811	632.1521	0.2704	4.2629	1937	1.049550133	0.002424461	70.37369718	0.16256324
33.86514436	×ÔÉí³µÁ¾	Road 1	654.1816752	96.28816223	-0.001639128	-0.848723412	0	0.121568628	675.3891	992.5928	632.1207	0.2699	4.2634	1938	1.048907928	0.002422977	70.39038454	0.162601788
33.88189817	×ÔÉí³µÁ¾	Road 1	654.6295536	96.23850403	-0.001639128	-0.818757832	0	0.113725491	675.7639	992.5996	632.1016	0.2699	4.2634	1939	1.048521698	0.002422085	70.40795128	0.162642367
33.89847201	×ÔÉí³µÁ¾	Road 1	655.0723215	96.17353363	-0.001639128	-0.747229099	0	0.105882354	676.299	992.6094	632.0742	0.2698	4.2641	1940	1.048016373	0.002420918	70.42532093	0.162682491
33.91516608	×ÔÉí³µÁ¾	Road 1	655.5181178	96.13396225	-0.001639128	-0.599157453	0	0.098039217	676.6733	992.6162	632.0551	0.2698	4.2641	1941	1.047708595	0.002420207	70.44281145	0.162722894
33.93185904	×ÔÉí³µÁ¾	Road 1	655.963715	96.09734344	-0.001639128	-0.576044261	0	0.098039217	677.0475	992.623	632.036	0.2698	4.2642	1942	1.047423782	0.002419549	70.46029606	0.162763284
33.94856191	×ÔÉí³µÁ¾	Road 1	656.4093895	96.05707855	-0.001639128	-0.625084877	0	0.098039217	677.4482	992.6299	632.0156	0.2702	4.2637	1943	1.047110611	0.002418826	70.47778581	0.162803685
33.96509432	×ÔÉí³µÁ¾	Road 1	656.850318	96.01395035	-0.001639128	-0.668171823	0	0.098039217	677.8489	992.6377	631.9951	0.2697	4.2642	1944	1.046775169	0.002418051	70.49509153	0.162843661
33.98177593	×ÔÉí³µÁ¾	Road 1	657.2949162	95.94722214	-0.001639128	-0.637264192	0	0.098039217	678.4628	992.6484	631.9638	0.2701	4.2638	1945	1.046256172	0.002416852	70.51254476	0.162883978
33.99847586	×ÔÉí³µÁ¾	Road 1	657.7398231	95.908461	-0.001635312	-0.612872005	0	0.098039217	678.8362	992.6553	631.9447	0.27	4.2639	1946	1.045954697	0.002416155	70.53001213	0.162924328
34.01518972	×ÔÉí³µÁ¾	Road 1	658.1848332	95.85078278	-0.001635312	-0.627441764	0	0.098039217	679.3961	992.665	631.9161	0.2704	4.2635	1947	1.045506088	0.002415119	70.54748658	0.162964694
34.03182587	×ÔÉí³µÁ¾	Road 1	658.6275918	95.81128006	-0.001632772	-0.64379406	0	0.098039217	679.7692	992.6719	631.8971	0.2704	4.2635	1948	1.045198845	0.002414409	70.56487466	0.16300486
34.04845322	×ÔÉí³µÁ¾	Road 1	659.0699319	95.77137222	-0.001632772	-0.643165648	0	0.098039217	680.1422	992.6787	631.8781	0.2703	4.2636	1949	1.044888451	0.002413692	70.58224839	0.163044994
34.06511357	×ÔÉí³µÁ¾	Road 1	659.5129668	95.73184891	-0.001631503	-0.631929219	0	0.098039217	680.515	992.6855	631.859	0.2703	4.2637	1950	1.044581047	0.002412982	70.59965147	0.163085195
34.0818135	×ÔÉí³µÁ¾	Road 1	659.9567577	95.66789474	-0.001631503	-0.625242591	0	0.098039217	681.1271	992.6973	631.8278	0.2693	4.2643	1951	1.044083626	0.002411833	70.6170876	0.163125472
34.09844672	×ÔÉí³µÁ¾	Road 1	660.3985953	95.62882462	-0.001631503	-0.632265687	0	0.098039217	681.4995	992.7041	631.8088	0.2692	4.2644	1952	1.043779747	0.002411131	70.63444901	0.163165577
34.11512539	×ÔÉí³µÁ¾	Road 1	660.8414577	95.58943863	-0.001631503	-0.636310995	0	0.098039217	681.8717	992.71	631.7897	0.2701	4.2635	1953	1.043473412	0.002410424	70.65185276	0.16320578
34.13177144	×ÔÉí³µÁ¾	Road 1	661.2831679	95.52757874	-0.001631503	-0.631746888	0	0.098039217	682.4563	992.7207	631.7599	0.27	4.2637	1954	1.042992279	0.002409312	70.66921446	0.163245885
34.14844278	×ÔÉí³µÁ¾	Road 1	661.7253681	95.48847427	-0.001631503	-0.628161609	0	0.098039217	682.8281	992.7275	631.7409	0.2699	4.2638	1955	1.042688133	0.00240861	70.68659747	0.16328604
34.18180489	×ÔÉí³µÁ¾	Road 1	662.6096156	95.4163559	-0.001628967	-0.70336175	0	0.105882354	683.4918	992.7402	631.707	0.2693	4.2645	1956	1.042127213	0.002407314	70.72136503	0.163366353
34.19850335	×ÔÉí³µÁ¾	Road 1	663.0517903	95.32786789	-0.001628967	-0.724378407	0	0.105882354	684.2344	992.7529	631.6691	0.2701	4.2638	1957	1.041438972	0.002405724	70.73875546	0.163406525
34.21511971	×ÔÉí³µÁ¾	Road 1	663.4915927	95.28493195	-0.001628967	-0.686142266	0	0.105882354	684.6054	992.7598	631.6502	0.27	4.2639	1958	1.041105026	0.002404953	70.75605484	0.163446487
34.23280861	×ÔÉí³µÁ¾	Road 1	663.9594775	95.22274246	-0.001628967	-0.680308163	0	0.105882354	685.1617	992.7705	631.6218	0.2694	4.2646	1959	1.04062133	0.002403835	70.77446228	0.163489008
34.24865007	×ÔÉí³µÁ¾	Road 1	664.3783101	95.18047256	-0.001628967	-0.703868926	0	0.105882354	685.5323	992.7764	631.6029	0.2702	4.2638	1960	1.040292564	0.002403076	70.79094203	0.163527076
34.26695551	×ÔÉí³µÁ¾	Road 1	664.8620686	95.13726883	-0.001628967	-0.713838041	0	0.105882354	685.9028	992.7832	631.584	0.2701	4.2639	1961	1.039956535	0.0024023	70.8099789	0.163571051
34.28237873	×ÔÉí³µÁ¾	Road 1	665.2693553	95.06657867	-0.001628967	-0.813685656	0	0.121568628	686.4846	992.7939	631.5543	0.27	4.2641	1962	1.039406723	0.00240103	70.8260099	0.163608083
34.29843169	×ÔÉí³µÁ¾	Road 1	665.6930442	95.01549911	-0.001628967	-0.902585387	0	0.121568628	686.8547	992.8008	631.5354	0.2699	4.2643	1963	1.039009438	0.002400112	70.84268908	0.163646612
34.31517781	×ÔÉí³µÁ¾	Road 1	666.1347775	94.96168671	-0.001627699	-0.94222182	0	0.137254909	687.2245	992.8076	631.5165	0.2697	4.2644	1964	1.038590897	0.002399145	70.86008144	0.163686788
34.33181946	×ÔÉí³µÁ¾	Road 1	666.5734923	94.90485306	-0.001627699	-1.023028493	0	0.145098045	687.5941	992.8145	631.4976	0.2696	4.2646	1965	1.038148857	0.002398124	70.87735795	0.163726697
34.34844534	×ÔÉí³µÁ¾	Road 1	667.0114666	94.83450623	-0.001627699	-1.116498113	0	0.152941182	688.0162	992.8223	631.4761	0.2695	4.2648	1966	1.037601715	0.00239686	70.894609	0.163766547
34.36512841	×ÔÉí³µÁ¾	Road 1	667.4505789	94.75497894	-0.001627699	-1.188281536	0	0.168627456	688.4643	992.8301	631.4532	0.2698	4.2645	1967	1.03698317	0.002395431	70.91190906	0.16380651
34.38184154	×ÔÉí³µÁ¾	Road 1	667.8899371	94.63756256	-0.001627699	-1.351565361	0	0.176470593	689.07	992.8408	631.4223	0.2701	4.2643	1968	1.036069931	0.002393322	70.92922503	0.16384651
34.39851801	×ÔÉí³µÁ¾	Road 1	668.3279753	94.5606102	-0.001627699	-1.392790675	0	0.176470593	689.4383	992.8477	631.4035	0.2699	4.2645	1969	1.035471413	0.002391939	70.94649304	0.163886399
34.41508708	×ÔÉí³µÁ¾	Road 1	668.762811	94.47775955	-0.001627699	-1.398321152	0	0.192156866	689.8326	992.8545	631.3834	0.2702	4.2642	1970	1.034827019	0.00239045	70.96363916	0.163926006
34.43182734	×ÔÉí³µÁ¾	Road 1	669.201572	94.35577011	-0.001627699	-1.567957759	0	0.20784314	690.384	992.8652	631.3552	0.2695	4.265	1971	1.033878212	0.002388259	70.98094655	0.163965987
34.44846312	×ÔÉí³µÁ¾	Road 1	669.6371445	94.25832138	-0.001627699	-1.730088115	0	0.215686277	690.7773	992.8721	631.3351	0.2698	4.2647	1972	1.033120277	0.002386508	70.99813331	0.164005688
34.46507545	×ÔÉí³µÁ¾	Road 1	670.0716571	94.16174469	-0.001623902	-1.793712139	0	0.223529413	691.1441	992.8789	631.3164	0.2697	4.2649	1973	1.032369125	0.002384773	71.01528336	0.164045305
34.48175119	×ÔÉí³µÁ¾	Road 1	670.5071509	94.01548233	-0.001623902	-1.788551569	0	0.23137255	691.6935	992.8887	631.2883	0.2702	4.2646	1974	1.031231529	0.002382145	71.03247991	0.164085029
34.49849071	×ÔÉí³µÁ¾	Road 1	670.943853	93.91712723	-0.001623902	-1.829014659	0	0.239215687	692.0594	992.8955	631.2697	0.27	4.2648	1975	1.030466545	0.002380378	71.04972943	0.164124875
34.51521666	×ÔÉí³µÁ¾	Road 1	671.3797292	93.81550369	-0.001623902	-1.906197309	0	0.239215687	692.4248	992.9023	631.251	0.2697	4.265	1976	1.02967614	0.002378552	71.06695175	0.164164659
34.53174321	×ÔÉí³µÁ¾	Road 1	671.8096226	93.64424057	-0.001623902	-1.910455465	0	0.239215687	693.0243	992.9131	631.2205	0.2699	4.2648	1977	1.028344093	0.002375475	71.08394673	0.164203917
34.5484688	×ÔÉí³µÁ¾	Road 1	672.2442169	93.54165573	-0.001623902	-1.88447535	0	0.247058824	693.3887	992.9199	631.2018	0.2696	4.2644	1978	1.027546211	0.002373632	71.10113304	0.164243617
34.56522115	×ÔÉí³µÁ¾	Road 1	672.6789889	93.43043289	-0.001623902	-1.952743769	0	0.254901975	693.7526	992.9268	631.1832	0.2694	4.2646	1979	1.026681145	0.002371633	71.11833236	0.164283348
34.58179389	×ÔÉí³µÁ¾	Road 1	673.108375	93.27306747	-0.001623902	-2.091615915	0	0.254901975	694.2978	992.9365	631.1554	0.2695	4.2645	1980	1.025457191	0.002368806	71.135327	0.164322605
34.59843114	×ÔÉí³µÁ¾	Road 1	673.5389131	93.16067047	-0.001622637	-2.066020966	0	0.254901975	694.6607	992.9434	631.1369	0.2692	4.2648	1981	1.024582993	0.002366787	71.15237324	0.164361982
34.61510431	×ÔÉí³µÁ¾	Road 1	673.9696268	92.99783936	-0.001622637	-1.970358014	0	0.254901975	695.2043	992.9531	631.1091	0.2693	4.2647	1982	1.023316528	0.002363861	71.16943517	0.164401395
34.63187206	×ÔÉí³µÁ¾	Road 1	674.4022907	92.89205475	-0.001622637	-1.928004742	0	0.239215687	695.5661	992.96	631.0907	0.269	4.265	1983	1.022493759	0.002361961	71.18658009	0.164441
34.64848292	×ÔÉí³µÁ¾	Road 1	674.8304369	92.79027328	-0.001622637	-1.823045254	0	0.23137255	695.9276	992.9658	631.0722	0.2697	4.2642	1984	1.021702126	0.002360132	71.20355144	0.164480204
34.66510697	×ÔÉí³µÁ¾	Road 1	675.2582449	92.64340668	-0.001622637	-1.604974151	0	0.215686277	696.4948	992.9766	631.0433	0.2692	4.2646	1985	1.02055983	0.002357493	71.22051728	0.164519395
34.68176182	×ÔÉí³µÁ¾	Road 1	675.6864525	92.55847549	-0.001622637	-1.469561577	0	0.184313729	696.8553	992.9834	631.0248	0.2689	4.2649	1986	1.019899254	0.002355967	71.23750354	0.164558633
34.69853286	×ÔÉí³µÁ¾	Road 1	676.1172974	92.48332901	-0.001622637	-1.224200487	0	0.160784319	697.2155	992.9902	631.0065	0.2686	4.2652	1987	1.019314781	0.002354617	71.25459852	0.164598123
34.71511293	×ÔÉí³µÁ¾	Road 1	676.5428222	92.39341278	-0.001622637	-0.810941041	0	0.137254909	697.781	993	630.9776	0.269	4.2646	1988	1.018615433	0.002353002	71.27148723	0.164637135
34.73175824	×ÔÉí³µÁ¾	Road 1	676.9699137	92.37010117	-0.001622637	-0.756223679	0	0.105882354	697.9608	993.0039	630.9684	0.2684	4.2652	1989	1.01843412	0.002352583	71.28843939	0.164676295
34.7492459	×ÔÉí³µÁ¾	Road 1	677.4182561	92.29551773	-0.001622637	-0.480763108	0	0.090196081	698.6541	993.0166	630.933	0.2682	4.2653	1990	1.017854027	0.002351243	71.30623927	0.164717413
34.76515554	×ÔÉí³µÁ¾	Road 1	677.8260181	92.26754379	-0.001622637	-0.338042825	0	0.05882353	699.0134	993.0225	630.9147	0.2687	4.2646	1991	1.017636452	0.00235074	71.3224295	0.164754812
34.78177336	×ÔÉí³µÁ¾	Road 1	678.2518445	92.2488533	-0.001622637	-0.125556946	0	0.043137256	699.3726	993.0293	630.8964	0.2684	4.2649	1992	1.017491081	0.002350404	71.33933798	0.164793871
34.79843407	×ÔÉí³µÁ¾	Road 1	678.6787272	92.23963852	-0.001618848	0.124474891	0	0.027450981	699.9113	993.0391	630.8688	0.2685	4.2648	1993	1.017419411	0.002350239	71.35628891	0.164833027
34.81583083	×ÔÉí³µÁ¾	Road 1	679.124468	92.23943253	-0.001618848	0.136368379	0	0.019607844	700.2703	993.0459	630.8506	0.2682	4.2651	1994	1.017417809	0.002350235	71.37398868	0.164873914
34.8318541	×ÔÉí³µÁ¾	Road 1	679.5350123	92.23832703	-0.001618848	0.110265754	0	0.011764706	700.6295	993.0518	630.8322	0.2689	4.2644	1995	1.01740921	0.002350215	71.3902909	0.164911572
34.84840924	×ÔÉí³µÁ¾	Road 1	679.9591786	92.23711166	-0.001618848	0.136403099	0	0.011764706	700.9886	993.0586	630.8138	0.2687	4.2647	1996	1.017399757	0.002350193	71.4071341	0.16495048
34.86506775	×ÔÉí³µÁ¾	Road 1	680.3859984	92.2382103	-0.001618848	0.17800875	0	0.011764706	701.4246	993.0664	630.7916	0.2689	4.2646	1997	1.069978268	0.00247165	71.42495835	0.164991654
[truncated: 1,911 more rows]
